# Supplementary material
Source: PubMed Central journal article supplement (PMC5391502)
Supplement: ja7b01624_si_001.pdf [file ja7b01624_si_001.pdf]

## SUPPORTING INFORMATION

# Peptide Macrocyclization Inspired by Non-Ribosomal Imine Natural Products

Lara R. Malins,<sup>1‡</sup> Justine N. deGruyter,<sup>1‡</sup> Kevin J. Robbins,<sup>2</sup> Paul M. Scola,<sup>2</sup> Martin D.  
Eastgate,<sup>3</sup> M. Reza Ghadiri,<sup>1</sup> and Phil S. Baran<sup>1\*</sup>

<sup>1</sup>Department of Chemistry, The Scripps Research Institute,  
10550 North Torrey Pines Road, La Jolla, California 92037, United States

<sup>2</sup>Department of Discovery Chemistry, Bristol-Myers Squibb Research and Development,  
5 Research Parkway, Wallingford, Connecticut 06492, United States

<sup>3</sup>Chemical Development, Bristol-Myers Squibb,  
One Squibb Drive, New Brunswick, New Jersey 08903, United States

**Corresponding Author**

\*E-mail: pbaran@scripps.edu

## Table of Contents

|                                                                                    |            |
|------------------------------------------------------------------------------------|------------|
| <b>General Experimental</b> .....                                                  | <b>S7</b>  |
| <b>Methods for Peptide Synthesis</b> .....                                         | <b>S7</b>  |
| <b>Materials</b> .....                                                             | <b>S7</b>  |
| <b>General Pictorial Supporting Information</b> .....                              | <b>S8</b>  |
| <b>Random Peptide Sequence Generator</b> .....                                     | <b>S9</b>  |
| <b>General Procedure 1. Rink Amide Resin (Glycinal Series)</b> .....               | <b>S10</b> |
| <b>General Iterative Peptide Assembly</b> .....                                    | <b>S11</b> |
| <b>On-resin Deallylation</b> .....                                                 | <b>S11</b> |
| <b>Aminoacetaldehyde Dimethyl Acetal Coupling</b> .....                            | <b>S11</b> |
| <b>Coupling Conditions for Boc-Sec-OH</b> .....                                    | <b>S12</b> |
| <b>General Procedure 2. Rink TG Resin (<math>\alpha</math>-Amino Series)</b> ..... | <b>S12</b> |
| <b>Automated Peptide Synthesis</b> .....                                           | <b>S13</b> |
| <b>Notes</b> .....                                                                 | <b>S14</b> |
| <b>General Procedure 3. Strecker Macrocyclization</b> .....                        | <b>S15</b> |
| <b>Notes</b> .....                                                                 | <b>S15</b> |
| <b>General Procedure 4. Reductive Amination</b> .....                              | <b>S16</b> |
| <b>Notes</b> .....                                                                 | <b>S16</b> |
| <b>General Procedure 5. Thiazolidine Formation</b> .....                           | <b>S17</b> |
| <b>Notes</b> .....                                                                 | <b>S17</b> |
| <b>General Procedure 6. Selenazolidine Formation</b> .....                         | <b>S17</b> |
| <b>Notes</b> .....                                                                 | <b>S17</b> |
| <b>Pictorial Supporting Information, Representative Procedures</b> .....           | <b>S19</b> |
| <b>Probing Imine Macrocyclization</b> .....                                        | <b>S21</b> |
| <b>Concentration Screen</b> .....                                                  | <b>S22</b> |
| <b>Characterization Data for Peptide Aldehydes</b> .....                           | <b>S24</b> |
| <b>Peptide S1</b> .....                                                            | <b>S24</b> |
| <b>Peptide S2</b> .....                                                            | <b>S26</b> |
| <b>Peptide S3</b> .....                                                            | <b>S28</b> |
| <b>Peptide S4</b> .....                                                            | <b>S30</b> |

|                                                                  |             |
|------------------------------------------------------------------|-------------|
| Peptide S5 .....                                                 | S32         |
| Peptide S6 .....                                                 | S34         |
| Peptide S7 .....                                                 | S36         |
| Peptide S8 .....                                                 | S39         |
| Peptide S9 .....                                                 | S41         |
| Peptide S10 .....                                                | S44         |
| Peptide S11 .....                                                | S46         |
| Peptide S12 .....                                                | S48         |
| Peptide S13 .....                                                | S52         |
| Peptide S14 .....                                                | S54         |
| Peptide S15 .....                                                | S56         |
| Peptide S16 .....                                                | S58         |
| Peptide S17 .....                                                | S61         |
| Peptide S19 .....                                                | S63         |
| Peptide S20 .....                                                | S69         |
| Peptide S21 .....                                                | S71         |
| Peptide S22 .....                                                | S73         |
| Peptide S23 .....                                                | S75         |
| Peptide S24 .....                                                | S77         |
| Peptide S25 .....                                                | S79         |
| <b>Characterization Data for Strecker Macrocyclization .....</b> | <b>S81</b>  |
| Peptide 1 .....                                                  | S81         |
| Peptide 2 .....                                                  | S85         |
| Peptide 3 .....                                                  | S89         |
| Peptide 4 .....                                                  | S94         |
| Peptide 5 .....                                                  | S99         |
| Peptide 6 .....                                                  | S103        |
| Peptide 7 .....                                                  | S106        |
| Peptide 8 .....                                                  | S110        |
| <b>Characterization Data for Reductive Amination .....</b>       | <b>S114</b> |
| Peptide 9 .....                                                  | S114        |

|                                                                              |             |
|------------------------------------------------------------------------------|-------------|
| Peptide 10 .....                                                             | S118        |
| Peptide 11 .....                                                             | S122        |
| Peptide 12 .....                                                             | S125        |
| Peptide 13 .....                                                             | S129        |
| Peptide 14 .....                                                             | S133        |
| Peptide 15 .....                                                             | S137        |
| Peptide 16 .....                                                             | S141        |
| Peptide 17 .....                                                             | S144        |
| Peptide 18 .....                                                             | S149        |
| <b>Characterization Data for Internal Lysine Studies .....</b>               | <b>S154</b> |
| Peptide 19 .....                                                             | S154        |
| Peptide 20 .....                                                             | S161        |
| Peptide 21 .....                                                             | S165        |
| Peptide 22 .....                                                             | S177        |
| pH Screen .....                                                              | S184        |
| Peptide 23 .....                                                             | S187        |
| Peptide 24 .....                                                             | S192        |
| <b>Characterization Data for Introduction of Bioorthogonal Handles .....</b> | <b>S199</b> |
| Peptide 25 .....                                                             | S199        |
| Peptide 26 .....                                                             | S203        |
| Peptide 27 .....                                                             | S206        |
| Peptide 28 .....                                                             | S210        |
| <b>Characterization Data for Pictet-Spengler.....</b>                        | <b>S213</b> |
| Peptide 29 .....                                                             | S213        |
| Peptide 30 .....                                                             | S219        |
| One-pot Protocol .....                                                       | S223        |
| Peptide 31 .....                                                             | S226        |
| Peptide 32 .....                                                             | S230        |
| <b>Characterization Data for Thiazolidine Formation.....</b>                 | <b>S233</b> |
| Peptide 33 .....                                                             | S233        |
| Peptide 34 .....                                                             | S238        |



|                                                                      |             |
|----------------------------------------------------------------------|-------------|
| <b>Peptide 35</b> .....                                              | <b>S242</b> |
| <b>Characterization Data for Selenazolidine Formation</b> .....      | <b>S246</b> |
| <b>Peptide 36</b> .....                                              | <b>S246</b> |
| <b>Characterization Data for Scytonemide A Analogues</b> .....       | <b>S249</b> |
| <b>Peptide S26</b> .....                                             | <b>S249</b> |
| <b>Equilibration Studies</b> .....                                   | <b>S251</b> |
| <b>Peptide 37</b> .....                                              | <b>S258</b> |
| <b>Notes</b> .....                                                   | <b>S262</b> |
| <b>Characterization Data for Koranimine Analogues</b> .....          | <b>S263</b> |
| <b>Peptide S27</b> .....                                             | <b>S263</b> |
| <b>Peptide 38</b> .....                                              | <b>S269</b> |
| <b>Characterization Data for Lugdunin and Thr-Lugdunin</b> .....     | <b>S273</b> |
| <b>Peptide 39</b> .....                                              | <b>S273</b> |
| <b>Peptide 40</b> .....                                              | <b>S278</b> |
| <b>Notes</b> .....                                                   | <b>S283</b> |
| <b>Characterization Data for Sanguinamide A and Analogues</b> .....  | <b>S284</b> |
| <b>Peptide S28</b> .....                                             | <b>S284</b> |
| <b>Peptide S29</b> .....                                             | <b>S287</b> |
| <b>Peptide 41</b> .....                                              | <b>S290</b> |
| <b>Peptide 42</b> .....                                              | <b>S294</b> |
| <b>Peptide 43</b> .....                                              | <b>S297</b> |
| <b>Circular Dichroism and Variable Temperature NMR Studies</b> ..... | <b>S304</b> |
| <b>General Experimental</b> .....                                    | <b>S304</b> |
| <b>Circular Dichroism Studies</b> .....                              | <b>S305</b> |
| <b>Peptide S2: TOCSY</b> .....                                       | <b>S306</b> |
| <b>Peptide 9: TOCSY</b> .....                                        | <b>S307</b> |
| <b>Peptide S13: TOCSY</b> .....                                      | <b>S308</b> |
| <b>Peptide 22: TOCSY</b> .....                                       | <b>S309</b> |
| <b>Peptide S20: TOCSY</b> .....                                      | <b>S310</b> |
| <b>Peptide 29: TOCSY</b> .....                                       | <b>S311</b> |
| <b>Peptide S26: TOCSY</b> .....                                      | <b>S312</b> |

|                                      |             |
|--------------------------------------|-------------|
| <b>Peptide 37: TOCSY .....</b>       | <b>S313</b> |
| <b>Peptide S27: TOCSY .....</b>      | <b>S314</b> |
| <b>Peptide 38: TOCSY .....</b>       | <b>S315</b> |
| <b>Peptide 39: TOCSY .....</b>       | <b>S316</b> |
| <b>Troubleshooting and FAQs.....</b> | <b>S317</b> |
| <b>References .....</b>              | <b>S320</b> |

## Methods for peptide synthesis

Analytical reverse-phase HPLC was performed on a Hitachi D-7000 separations module equipped with a L-4500A photodiode array detector. Peptides were analyzed using a Vydac 218TP54 Protein & Peptide C18 column (5  $\mu\text{m}$ , 4.6 mm x 250 mm) at a flow rate of 1.5 mL min<sup>-1</sup> using a mobile phase of 99% water/1% acetonitrile containing 0.1% TFA (Solvent A) and 10% water/90% acetonitrile containing 0.07% TFA (Solvent B). Results were analyzed using Hitachi Model D-7000 Chromatography Data Station Software. Low-resolution mass spectra (LRMS) and reaction monitoring were recorded on an Agilent LCMS TOF mass spectrometer using electrospray ionization time-of-flight (ESI-TOF) reflectron experiments.

Preparative reverse-phase HPLC was performed using a Hitachi system comprised of an L-7150 pump and L-4000 programmable UV detector operating at a wavelength of 230 nm coupled to a Hitachi D-2500 Chromato-Integrator. Peptides were purified on a Thermo Scientific Bio-basic C18 10  $\mu\text{m}$  preparative column operating at a flow rate of 12 mL min<sup>-1</sup> using a mobile phase of 99% water/1% acetonitrile containing 0.1% TFA (Solvent A) and 10% water/90% acetonitrile containing 0.07% TFA (Solvent B) and a linear gradient as specified. Peptides were isolated as white solids (unless otherwise noted) following lyophilization.

Several peptide aldehydes were prepared using an Advanced ChemTech Apex 396 DCFWM automated peptide synthesizer. Reaction set-up, progress, and analysis were monitored by Aaptec Multiple Organic Synthesizer (Version 1.60.17T) software. An Innova 2000 portable platform shaker (operating at 145 rpm) was used for the general mixing and agitation of solid-phase reactions.

## Materials

Commercial materials were used as received unless otherwise noted. Amino acids and coupling reagents were obtained from Novabiochem or Combi-blocks. Rink amide resin (0.8 mmol/g) was purchased from Chempep. Solid-phase reaction vessels and pressure caps were purchased from Torviq. Reagents that were not commercially available were synthesized following literature procedures.

## General Pictorial Supporting Information

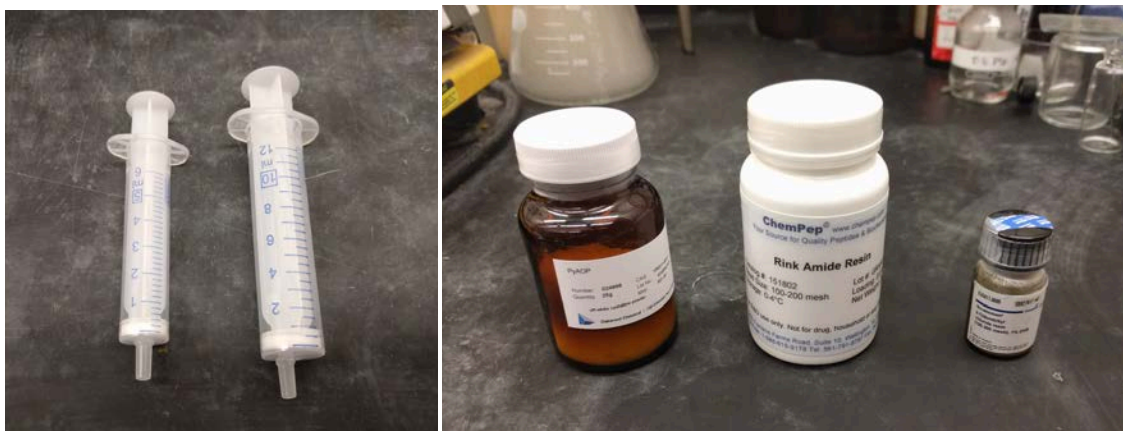

**(Left)** Solid-phase reaction vessels purchased from Torviq. **(Right)** PyAOP coupling reagent and commercially available resins (Chempep Rink amide resin and Novabiochem 2-chlorotryl chloride resin).

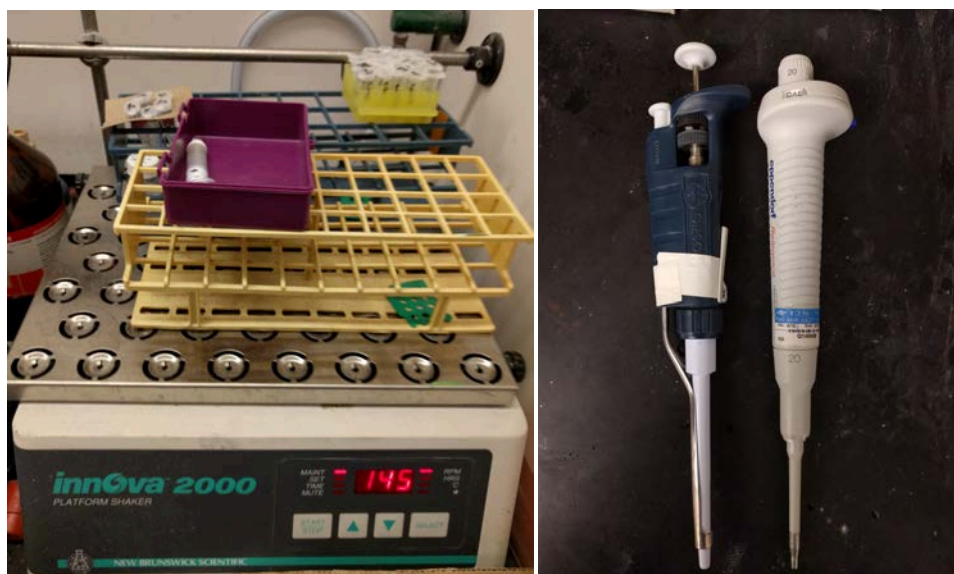

**(Left)** Orbital shaker for solid-phase peptide synthesis (SPPS). **(Right)** Adjustable pipettes (200  $\mu$ L and 20  $\mu$ L) for reaction set-up.

## Random Peptide Sequence Generator

In an effort to preclude any bias toward preorganization in our selection of substrates, the *Random Protein Sequence* tool\* was used to design indiscriminate residue sequences.

URL: [http://www.bioinformatics.org/sms2/random\\_protein.html](http://www.bioinformatics.org/sms2/random_protein.html)

The top screenshot shows the homepage of the SMS Sequence Manipulation Suite. The main heading is "Sequence Manipulation Suite: Random Protein Sequence". Below the heading, there is a description: "Random Protein Sequence generates a random sequence of the length you specify. Random sequences can be used to evaluate the significance of sequence analysis results." A text input field contains the number "1000". Below the input field, there are "Submit", "Clear", and "Reset" buttons. A note says "Please check the browser compatibility page before using this program." A dropdown menu for "Number of random sequences to generate" is set to "1". There are also links for "new window", "home", and "citation".

The bottom screenshot shows the same website but with a window displaying the results of a sequence generation. The window title is "about:blank". The content shows seven generated sequences, each consisting of 8 residues:

```
>random sequence 1 consisting of 8 residues.
TYHATLKW

>random sequence 2 consisting of 8 residues.
PKTAITRS

>random sequence 3 consisting of 8 residues.
AGEPQLMG

>random sequence 4 consisting of 8 residues.
YIGEDSWI

>random sequence 5 consisting of 8 residues.
EVVVMVA

>random sequence 6 consisting of 8 residues.
QWTWIPCL

>random sequence 7 consisting of 8 residues.
```

(Top) Screen shot of the *Random Protein Sequence* website homepage. (Bottom) Example of the sequence generator at work (number of residues: 8, number of sequences: 50).

\*The Sequence Manipulation Suite © 2000, 2004 Paul Stothard

## Solid-phase peptide synthesis

### General procedure 1. Rink amide resin (glycinal series)

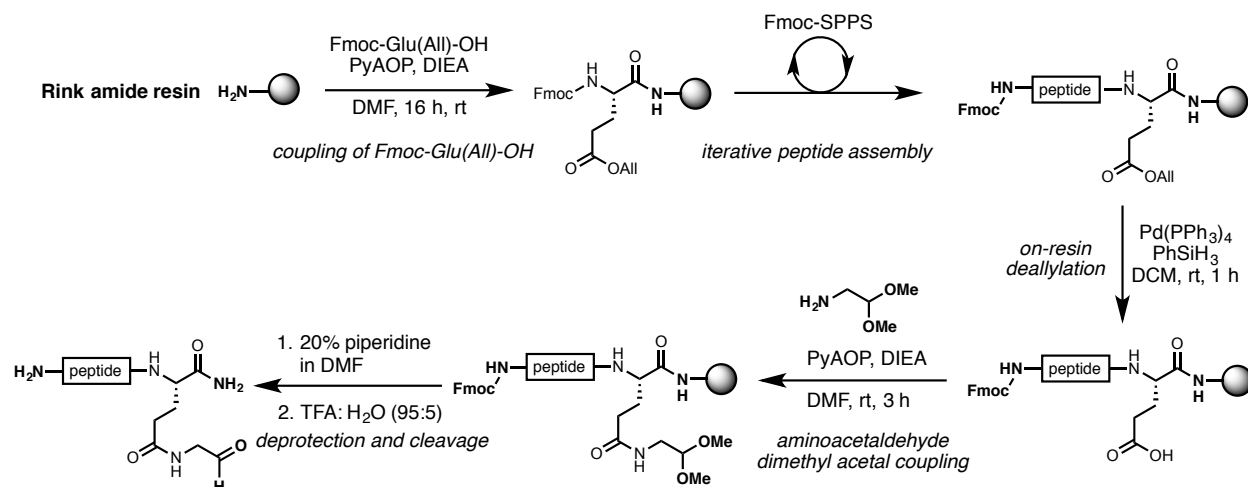

#### Preloading Rink amide resin – Coupling of Fmoc-Glu(All)-OH

Rink amide resin (1.0 equiv., substitution = 0.8 mmol/g) was swollen in dry DCM for 30 min then washed with DCM (5 x 3 mL) and DMF (5 x 3 mL). A solution of the Fmoc-Glu(All)-OH (4.0 equiv.), PyAOP (4.0 equiv.) and *N,N*-diisopropylethylamine (DIEA, 8.0 equiv.) in DMF (final concentration 0.1 M) was added to the resin (1.0 equiv.) and agitated at room temperature. After 16 h, the resin was washed with DMF (5 x 3 mL), DCM (5 x 3 mL), and DMF (5 x 3 mL). A capping step was performed as described below and the resin-bound residue was submitted to iterative peptide assembly (Fmoc-SPPS).

The loading efficiency was evaluated through treatment of the resin with 20% piperidine/DMF (3 mL, 2 x 3 min) to deprotect the Fmoc group. The combined deprotection solutions were diluted to 10 mL with 20% piperidine/DMF. An aliquot of this mixture (50  $\mu$ L) was diluted 200-fold with 20% piperidine/DMF and the UV absorbance of the piperidine-fulvene adduct was measured ( $\lambda = 301$  nm,  $\epsilon = 7800$  M<sup>-1</sup> cm<sup>-1</sup>) to quantify the amount of amino acid loaded onto the resin. The theoretical maximum for the reported yields of all isolated peptides are based on the numerical value obtained from the resin loading.

## General iterative peptide assembly (Fmoc-SPPS)

Peptides were elongated using iterative Fmoc-solid-phase peptide synthesis (Fmoc-SPPS), according to the following general protocols:

*Deprotection:* The resin was treated with 20% piperidine/DMF (3 mL, 2 x 3 min) and washed with DMF (5 x 3 mL), DCM (5 x 3 mL) and DMF (5 x 3 mL).

*General amino acid coupling:* A preactivated solution of protected amino acid (4 equiv.), PyBOP (4 equiv.), and *N*-methylmorpholine (NMM) (8 equiv.) in DMF (final concentration 0.1 M) was added to the resin. After 1 h, the resin was washed with DMF (5 x 3 mL), DCM (5 x 3 mL) and DMF (5 x 3 mL).

*Capping:* Acetic anhydride/pyridine (1:9 v/v) was added to the resin (3 mL). After 3 min the resin was washed with DMF (5 x 3 mL), DCM (5 x 3 mL) and DMF (5 x 3 mL).

### On-resin deallylation

A solution of Pd(PPh<sub>3</sub>)<sub>4</sub> (0.88 equiv.) and PhSiH<sub>3</sub> (40 equiv.) in dry DCM (final concentration of 0.1 M with respect to resin) was added to the resin (1 equiv.). The resin was shaken for 1 h and the progress of the reaction checked by cleavage of a small portion of resin beads and LC-MS analysis. The procedure was repeated if necessary, and upon completion, the resin was washed with DCM (10x 3 mL) and DMF (10 x 3 mL). To remove residual Pd from the solid support, the resin-bound peptide was washed (2 x 15 min) with a solution of sodium dimethyldithiocarbamate hydrate (0.02 M in DMF). Following Pd removal, the resin was washed with DMF (5 x 3 mL) and DCM (5 x 3 mL).

### Aminoacetaldehyde dimethyl acetal coupling

A solution of aminoacetaldehyde dimethyl acetal (10 equiv.), PyAOP (10 equiv.), and DIEA (20 equiv.) in dry DMF (final concentration of 0.1 M with respect to resin) was added to the resin (1 equiv.). The resin was shaken for 3 h and the progress of the reaction checked by cleavage of a small portion of resin beads and LC-MS analysis. The procedure was repeated if necessary and,

upon completion, the resin was washed with DMF (10 x 3 mL), DCM (10 x 3 mL), and DMF (10 x 3 mL).

### Coupling conditions for Boc-Sec-OH (for the synthesis of selenopeptide dimers)

A solution of Boc-Sec-OH dimer (2.0 eq.), HOAt (4.0 eq.) and DIC (4.0 eq.) in DMF (final concentration 0.1 M) was added to the resin (1.0 eq.) and shaken at rt. After 3 h, the resin was washed with DMF (5 x 3 mL), DCM (5 x 3 mL), and DMF (5 x 3 mL).

*Cleavage:* A mixture of TFA and water (95:5 v/v) was added to the resin. After 2 h, the resin was washed with TFA (3 x 2 mL) and DCM (3 x 2 mL). Note: The scavenger triisopropylsilane (TIS) was excluded from the cleavage mixture to prevent unwanted reduction of the aldehyde.

*Work-up:* The combined cleavage solution and TFA and DCM washes were concentrated under a stream of nitrogen. The residue was treated with cold Et<sub>2</sub>O to precipitate the crude peptide, which was subsequently dissolved in water/acetonitrile containing 0.1% TFA, filtered and purified by reverse-phase HPLC.

### General procedure 2. Rink TG resin ( $\alpha$ -amino acid series)

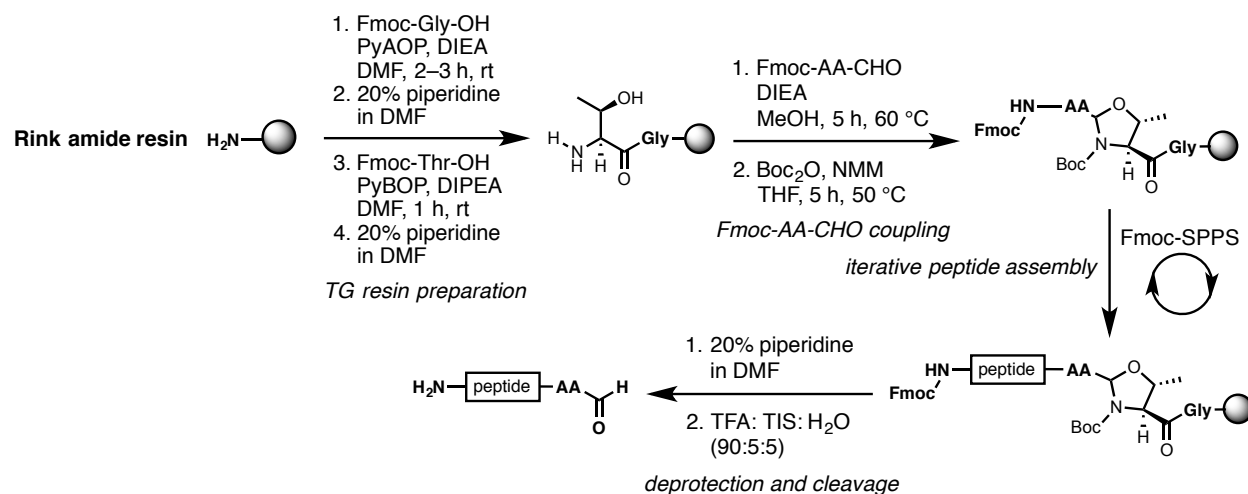

### Preloading Rink TG resin – Coupling of Fmoc-AA-CHO

Rink amide resin (1.0 equiv., substitution = 0.8 mmol/g) was swollen in dry DCM for 30 min then washed with DCM (5 x 3 mL) and DMF (5 x 3 mL). A solution of Fmoc-Gly-OH (4.0



equiv.), PyAOP (4.0 equiv.), and *N*-methylmorpholine (NMM) (8.0 equiv.) in DMF (final concentration of 0.1 M) was added and the resin agitated on an orbital shaker at rt for 2–3 h. The resin was washed with DMF (5 x 3 mL), DCM (5 x 3 mL), and DMF (5 x 3 mL) and capped with a solution of acetic anhydride/pyridine (1:9 v/v, 3 mL) for 10 min. The resin was washed with DMF (5 x 3 mL), DCM (5 x 3 mL), and DMF (5 x 3 mL), then treated with 20% piperidine/DMF (3 mL, 2 x 3 min) and washed with DMF (5 x 3 mL), DCM (5 x 3 mL), and DMF (5 x 3 mL) to effect Fmoc-deprotection. A preactivated solution of Fmoc-Thr-OH (4.0 equiv.), PyBOP (4.0 equiv.) and *N*-methylmorpholine (NMM) (8 equiv.) in DMF (final concentration 0.1 M) was added to the resin. After 1 h, the resin was washed with DMF (5 x 3 mL), DCM (5 x 3 mL) and DMF (5 x 3 mL). The Fmoc group was removed by treatment with 20% piperidine/DMF (3 mL, 2 x 3 min) and washed with DMF (5 x 3 mL), DCM (5 x 3 mL) and DMF (5 x 3 mL).

*Note: The capping step was not performed following Fmoc-Thr-OH coupling to avoid potential acetylation of the free threonine hydroxyl side-chain.*

Fmoc-AA-CHO was prepared according to literature procedure.<sup>1</sup> A solution of Fmoc-AA-CHO (4.0 equiv.) and DIEA (1% v/v with respect to MeOH) in MeOH (final concentration of 0.1 M with respect to the resin) was added to the resin and the resulting mixture was agitated at 60 °C for 5 h. The resin was then washed with MeOH (5 x 3 mL), DMF (5 x 3 mL), DCM (5 x 3 mL), and THF (5 x 3 mL). A solution of Boc<sub>2</sub>O (5.0 equiv.) and NMM (5.0 equiv.) in THF (final concentration of 0.1 M with respect to the resin) was added to the resin and agitated at 50 °C for 5 h. The resin was washed with THF (5 x 3 mL), DCM (5 x 3 mL), and DMF (5 x 3 mL). The loading efficiency was evaluated as described in general procedure 1. The resin-bound residue was submitted to iterative peptide assembly (Fmoc-SPPS), either manually (as described above) or through preparation on an automated peptide synthesizer.

*Automated Peptide Synthesis:* Each of the required Fmoc-AA-OHs were added to labeled 50 mL centrifuge tubes. The amino acids were dissolved in a stock solution of 0.4 M OxymaPure<sup>®</sup> (Ethyl (hydroxyimino)cyanoacetate) in *N*-methylpyrrolidinone (NMP). A stock solution 1.2 M of *N,N'*-diisopropylcarbodiimide (DIC) in NMP was prepared for coupling reactions, which were

run at ca. 6.4 fold excess of amino acid relative to the resin-bound peptide. A separate stock solution of 30% pyrrolidine in NMP was prepared to effect Fmoc-deprotection. The dried resin was added to the instrument well plate (70  $\mu\text{mol}$  per well), which was kept under a slow stream of  $\text{N}_2$  gas for the duration of the synthesis. The resin-bound peptide was then submitted to a reswelling period, followed by sequential deprotection–coupling reactions (ca. 2 hours per residue); progress was monitored by Aaptec Multiple Organic Synthesizer software. No capping steps were performed. On termination, the resin was transferred to a disposable PP reaction vessel, washed, and subjected to resin cleavage, as described below.

*Note: Throughout the text, general procedure 2a refers to manual elongation of the peptide amino aldehydes; general procedure 2b refers to automated elongation.*

*Cleavage:* A mixture of TFA/TIS/water (90:5:5 v/v/v) was added to the resin. After 2 h, the resin was washed with TFA (3 x 2 mL) and DCM (3 x 2 mL). *Note: With Rink TG resin, reduction of the C-terminal aldehyde was not observed in the presence of the scavenger triisopropylsilane (TIS).*

*Work-up:* The combined cleavage solution and TFA and DCM washes were concentrated under a stream of nitrogen. The residue was treated with cold  $\text{Et}_2\text{O}$  to precipitate the crude peptide, which was subsequently dissolved in water/acetonitrile containing 0.1% TFA, filtered and purified by reverse-phase HPLC.

The theoretical maximum for the reported yields of all isolated peptides are based on the numerical value obtained from the resin loading.

**Notes on aldehyde synthesis:**

- Although a commercial NovaSyn TG resin is available, all described C-terminal aldehydes were constructed on a manually prepared Rink amide-based TG resin. Qualitative assessments indicate that the loading efficiency—and accordingly, isolated yields—are significantly higher with this resin linker, and no detrimental effect on peptide purity was observed, except where otherwise noted. Similarly, cost comparisons against the commercial variant reveal economic superiority.

- Oligomerization of the purified peptide aldehydes was observed on standing at reduced temperatures. As such, for ease of analysis, it is recommended that the aldehydes be used within one week of purification. Nonetheless, due to the reversible nature of the imine formation, oligomerized starting materials can, in principle, be employed (for a more detailed examination of this phenomenon, refer to the one-pot preparation of  $\beta$ -carboline **30**).
- Epimerization of C-terminal aldehydes has been documented in the literature upon loading onto TG resin and during routine peptide purifications.<sup>2</sup> In the majority of our synthetic amino aldehydes prepared on Rink TG resin, however, we did not observe epimerization upon analysis of the purified peptide aldehydes by analytical HPLC and NMR. One notable exception was in the preparation of peptide **S12** (a model pentapeptide bearing a D-Leu aldehyde), in which we isolated small amounts of the C-terminal epimer following purification. Interestingly, in the case of the natural product imines, which are thought to spontaneously self-assemble following reductive cleavage from the NRPS, there is likely a self-correcting mechanism (thermodynamic equilibration) that leads to the cyclization of a single C-terminal configuration. Such configurational equilibration in imine macrocyclization processes has previously been observed by Marahiel and coworkers.<sup>3,4</sup>

## **Macrocyclization Protocols**

### **General procedure 3. Strecker macrocyclization**

To a solution of purified peptide aldehyde in deionized water (final concentration of 1 mM) was added KCN (1.2 equiv.). The resulting solution was stirred at room temperature for 24–48 h (unless otherwise noted) until consumption of starting material, as monitored by LC-MS analysis. The reaction was purified by preparative reverse-phase HPLC (direct inject of crude reaction mixture; eluent as noted) to afford the peptide macrocycle following lyophilization.

#### **Notes on Strecker macrocyclizations:**

- Due to the standard scale of the described reactions, KCN was typically added as a stock solution.

- As with most macrocyclization protocols, high dilution conditions are used to prevent unwanted oligomerization. See p. S22 for a thorough concentration study of the related reductive amination reaction.
- Competitive nucleophilic addition to the aldehyde, resulting in formation of the corresponding linear cyanohydrin, accounts for the majority of the mass balance. In some cases, the reversible addition of cyanide to the aldehyde allows for the gradual funneling of material to the thermodynamically more stable  $\alpha$ -aminonitrile. This feature of the equilibrium cyclization process is advantageous in slow macrocyclization reactions. In methods that require preactivation (e.g. activated ester formation in traditional amide couplings), competitive hydrolysis generally limits the yield and efficiency of such macrocyclizations.
- Care should be taken when handling the Strecker macrocyclization products in aqueous acidic media (e.g. HPLC buffers containing TFA), as gradual hydrolysis of the  $\alpha$ -aminonitrile to regenerate the linear amino aldehyde was observed in some cases. Strecker products should ideally be stored dry at  $-20\text{ }^{\circ}\text{C}$  to ensure long-term stability.

#### **General Procedure 4. Reductive amination**

To a solution of purified peptide aldehyde (final concentration of 1 mM) in NaOAc/AcOH buffer (0.4 M, pH = 5.5, unless otherwise noted) was added  $\text{NaBH}_3\text{CN}$  (10 equiv.). The resulting solution was stirred at room temperature for 8 – 24 h, until consumption of starting material, as monitored by LC-MS analysis. The reaction was purified by preparative reverse-phase HPLC (direct inject of crude reaction mixture; eluent as noted) to afford the peptide macrocycle following lyophilization.

#### **Notes on reductive amination:**

- Due to the standard scale of the described reactions,  $\text{NaBH}_3\text{CN}$  was typically added as a stock solution.
- Competitive reduction of the linear aldehyde is a common byproduct observed in the reductive amination reactions, particularly in peptides that are less predisposed to cyclize. The amount of aldehyde reduction was also found to be highly pH dependent. A brief

study on the effect of pH in the synthesis of Lys-containing macrocycle **22** indicated that lower pH resulted in greater aldehyde reduction (see p. S184 for details). However, in some substrates, reduction was more prevalent at elevated pH. As a general rule, moderately acidic conditions (pH = 5.0–5.5) allowed for efficient formation of the desired macrocycles while minimizing the amount of reduced aldehyde observed.

### **General Procedure 5. Thiazolidine formation**

*Tris*(2-carboxyethyl)phosphine (TCEP, 10 equiv.) was dissolved in Na<sub>2</sub>HPO<sub>4</sub> buffer (0.2 M, final pH = 7.0 – 7.5), and the solution was degassed under argon sparge for 10 minutes. The solution was added to purified peptide aldehyde (final concentration of 1 mM) and the resulting solution stirred at room temperature for 6–18 h, until consumption of starting material, as monitored by LC-MS analysis. The reaction was purified by preparative reverse-phase HPLC (direct inject of crude reaction mixture; eluent as noted) to afford the peptide macrocycle following lyophilization.

#### **Notes on thiazolidine formation:**

- In order to facilitate thiazolidine formation, the N-terminal Cys residue must be in reduced form. To unleash the reactive thiol from StBu disulfide-protected Cys residues (e.g. **S23**), the phosphine reductant TCEP is added to the reaction mixture. Upon addition, pungent tBuSH is immediately observed.

### **General Procedure 6. Selenazolidine formation**

*Tris*(2-carboxyethyl)phosphine (TCEP, 10 equiv.) and sodium ascorbate (50 equiv.) were dissolved in Na<sub>2</sub>HPO<sub>4</sub> buffer (0.2 M, final pH = 7.0 – 7.5), and the solution was degassed under argon sparge for 10 minutes. The solution was added to the purified peptide aldehyde (final concentration of 1 mM) and the resulting solution stirred at room temperature for 1–2 h, until consumption of starting material, as monitored by LC-MS analysis. The reaction was purified by preparative reverse-phase HPLC (direct inject of crude reaction mixture; eluent as noted) to afford the peptide macrocycle following lyophilization.

**Notes on selenazolidine formation:**

- Selenopeptides exist in solution primarily as the corresponding diselenide dimers. In order to facilitate macrocyclization, the dimer must first be reduced *in situ* by treatment with TCEP. To prevent phosphine-mediated deselenization,<sup>5</sup> sodium ascorbate is added to the reaction mixture.<sup>6,7</sup>
- The selenazolidine cyclization proceeds much more rapidly than the corresponding thiazolidine cyclization, and generally reaches completion after 1–2 h at rt.
- The selenazolidine product is stable to HPLC purification. However, prolonged exposure to aqueous media may lead to hydrolysis of the selenazolidine to re-form the linear diselenide dimer. The peptide should be stored dry and in the freezer to ensure long-term stability.

## Pictorial Supporting Information, Representative Procedures.

### Representative Procedure – Strecker Macrocyclization:

The following pictorial guide is representative of the general techniques employed in each of the macrocyclization reactions described. Reactions are generally carried out in an open flask and in aqueous reaction media, as described in the general procedures.

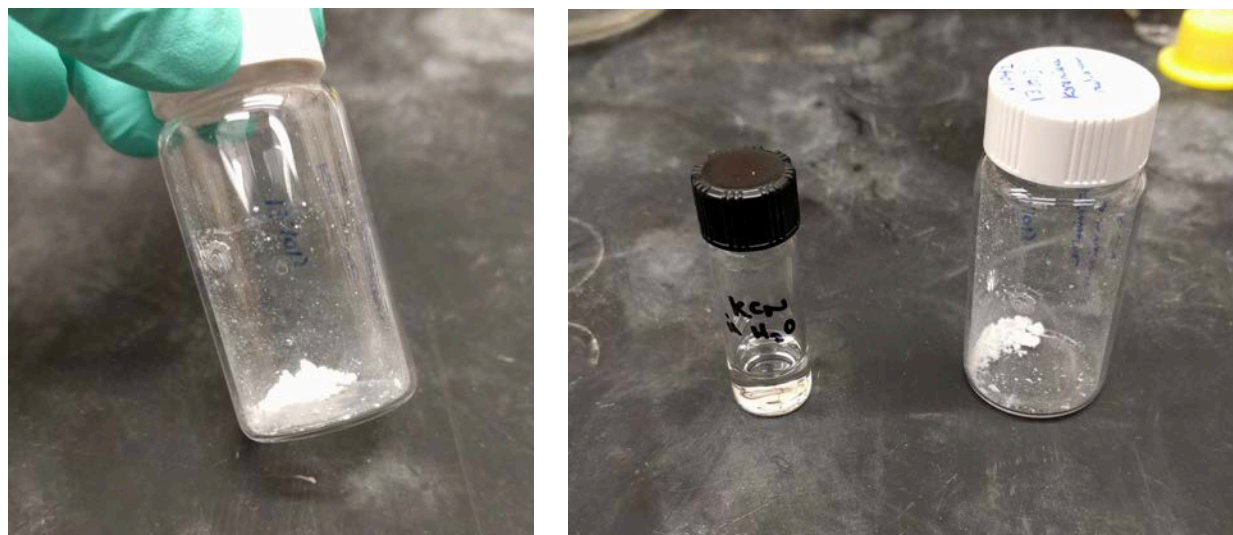

**(Left)** Purified peptide amino aldehyde following lyophilization into a 20 mL vial **(Right)** A solution of KCN in water ( $\sim 1$  mg/mL) and the peptide amino aldehyde starting material.

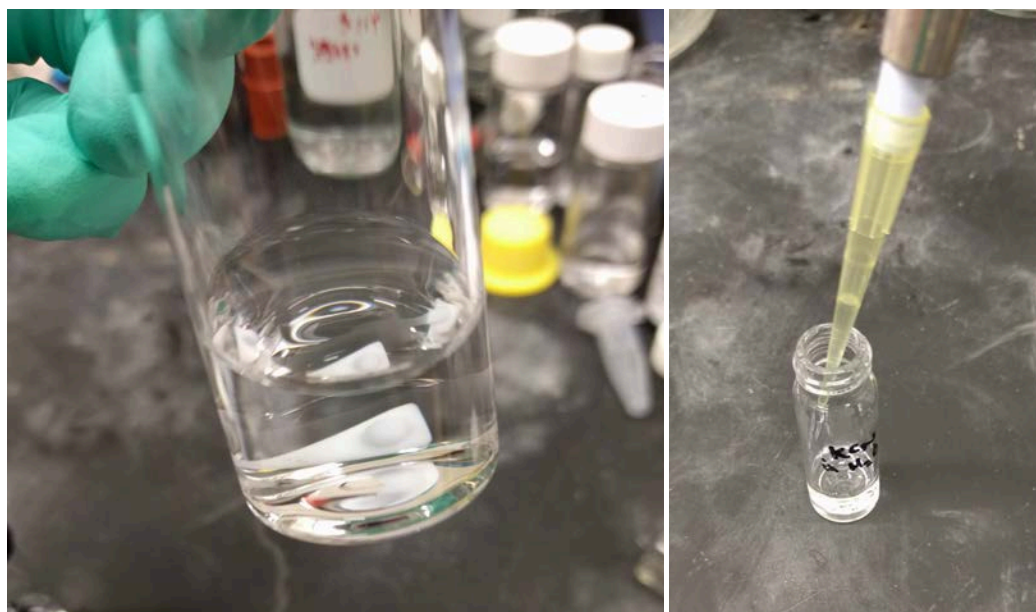

**(Left)** The peptide is dissolved in water (1 mM final concentration) and the vial charged with a magnetic stir bar **(Right)** An appropriate amount of the solution of KCN in water (1.2 eq. with respect to the peptide) is drawn up into a pipette.



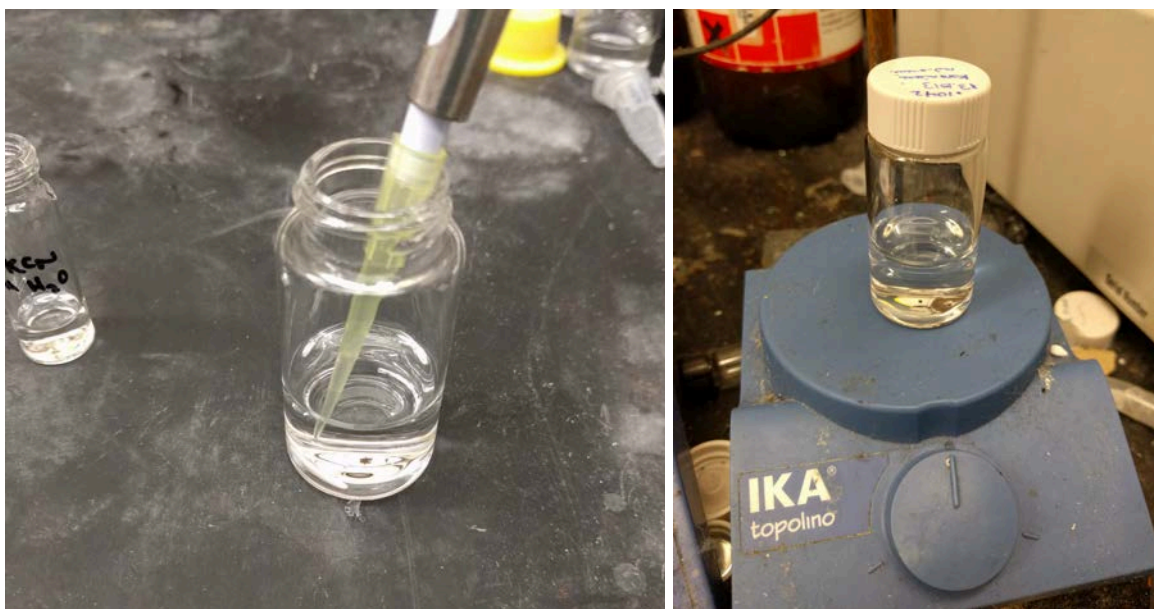

**(Left)** The KCN solution is added to the peptide. **(Right)** The reaction is stirred at room temperature and monitored by LC-MS. Upon completion, the reaction is purified immediately by preparative reverse-phase HPLC.

#### **Representative Procedure – Peptide Lyophilization:**

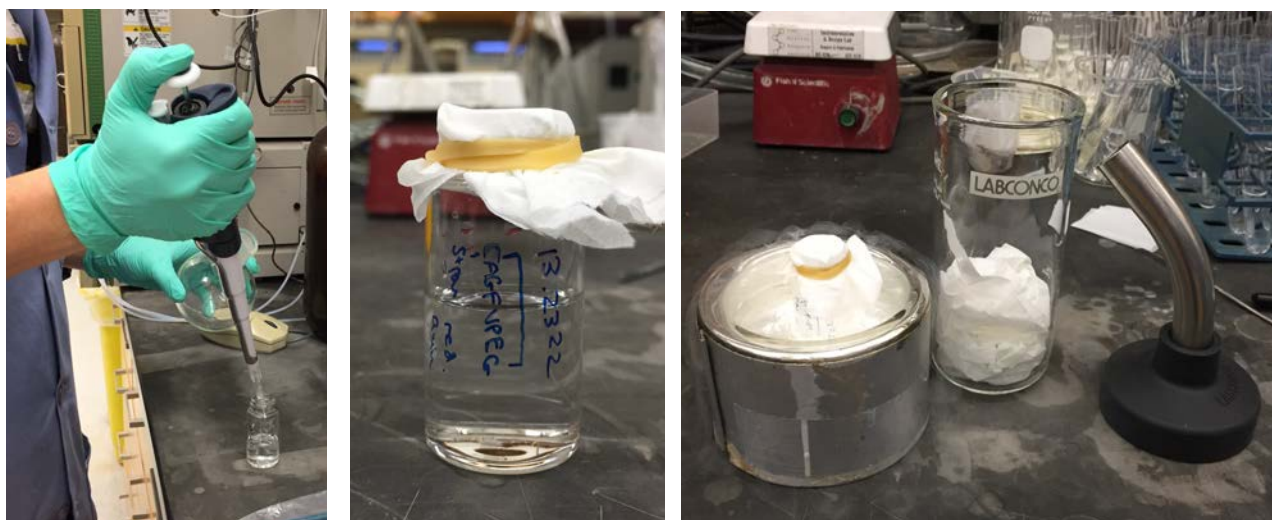

**(Left)** Following HPLC purification, clean fractions are combined, concentrated on a rotovap, and transferred to a 20 mL vial for lyophilization **(Center)** Pre-weighed vial containing combined HPLC fractions. **(Right)** The vial is flash-frozen in liquid nitrogen and placed in a freeze-drier vessel for lyophilization (24 – 48 h).



## Probing Imine Macrocyclization

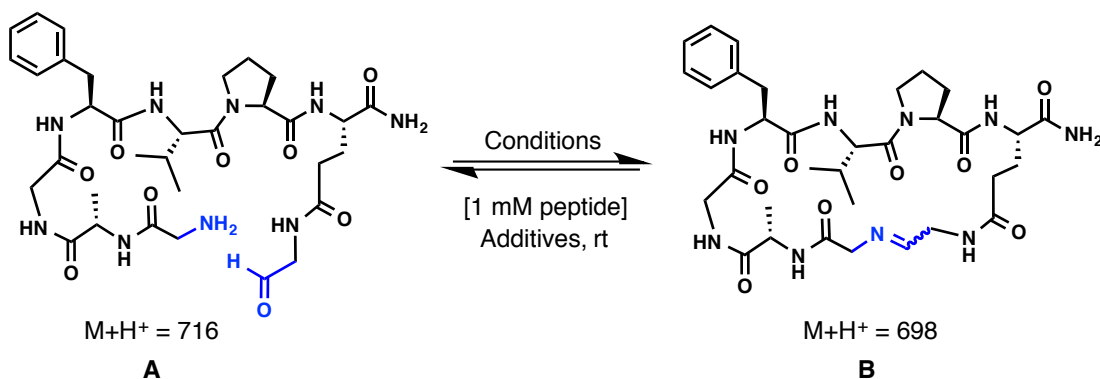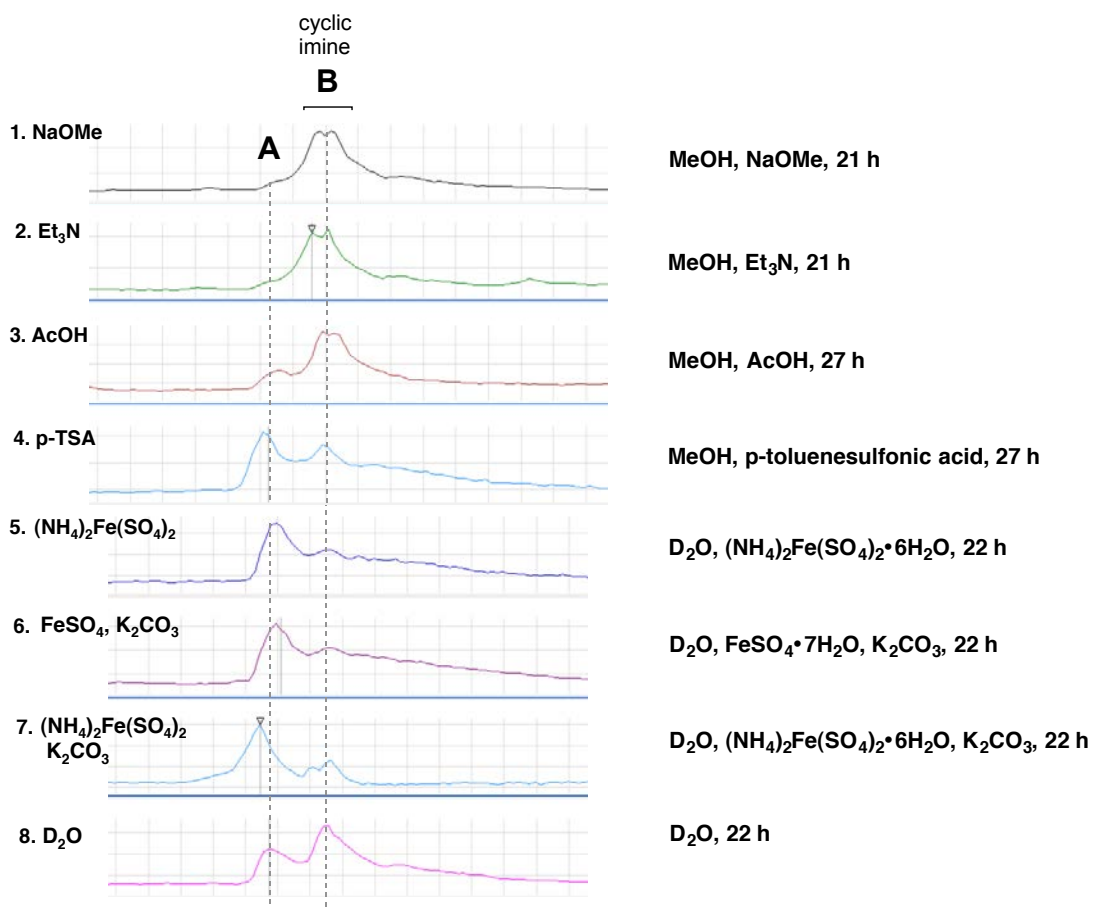

TIC traces at various timepoints showing the treatment of peptide **S2** with various additives. Formation of cyclic imine (**B**) is observed most prominently under basic conditions with MeOH as the solvent (entries 1–2). Surprisingly, condensation is also observed in aqueous media (D<sub>2</sub>O, entry 8). However, imine formation was not visible upon analysis of the same sample by <sup>1</sup>H NMR. The acidic LC-MS eluent (0.1% formic acid) may be sufficient to catalyze the condensation following injection of the sample onto the column.

## Concentration Screen

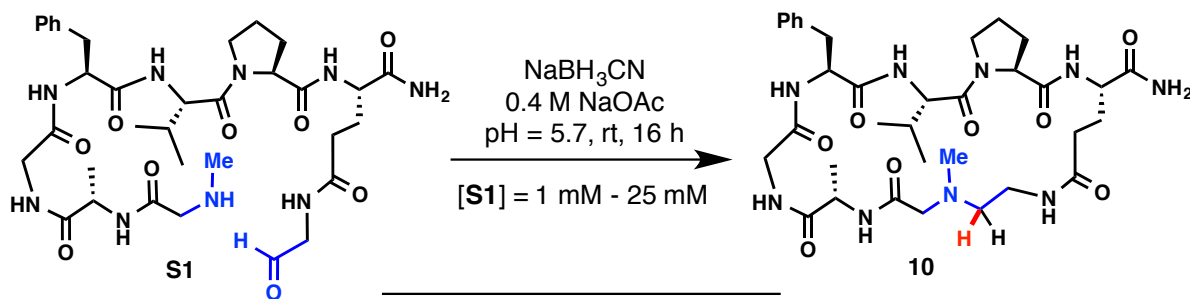

| entry | [aldehyde] | yield (%) <sup>b</sup> |
|-------|------------|------------------------|
| 1     | 1 mM       | 55 (50) <sup>c</sup>   |
| 2     | 2 mM       | 58                     |
| 3     | 5 mM       | 45                     |
| 4     | 10 mM      | 40                     |
| 5     | 25 mM      | 23                     |

<sup>a</sup> 0.5  $\mu$ mol scale. <sup>b</sup> Yields determined using analytical HPLC. <sup>c</sup> Isolated yield.

To evaluate the effect of peptide concentration on macrocyclization yield, the reductive amination of peptide **S1** was carried out in 0.4 M NaOAc buffer (pH = 5.7) at 1 mM, 2 mM, 5 mM, 10 mM, and 25 mM concentration with respect to **S1**. The peptide (0.5  $\mu$ mol scale) was dissolved in buffer and treated with NaBH<sub>3</sub>CN (10 equiv.). The reaction was stirred at rt for 16 h, diluted to a concentration of 0.5 mM with respect to the initial concentration of **S1** and evaluated by analytical reverse-phase HPLC (5 to 100% B over 25 min,  $\lambda$  = 220 nm). To estimate reaction yield, the area of the product was integrated and compared to a standard curve derived from the integration ( $\lambda$  = 220 nm) of stock samples of macrocycle **10** prepared at concentrations of 0.5 mM, 0.25 mM, and 0.10 mM.

*Standard curve preparation:*

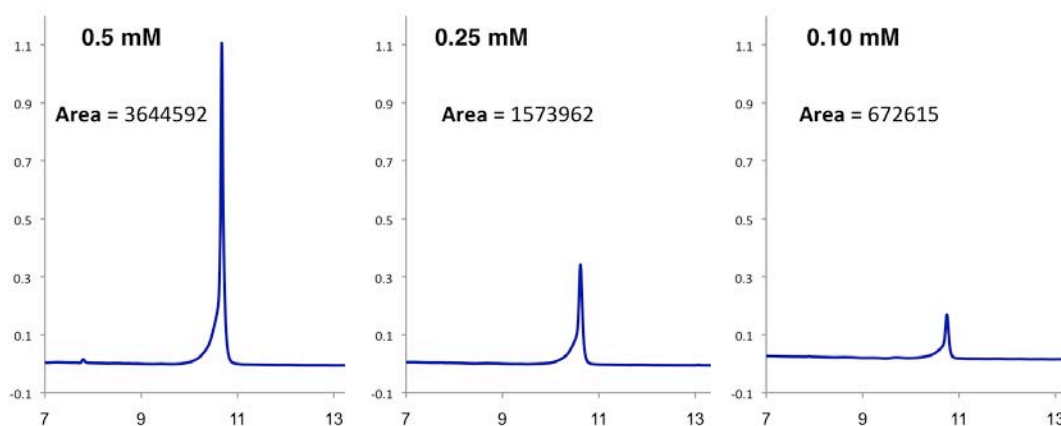

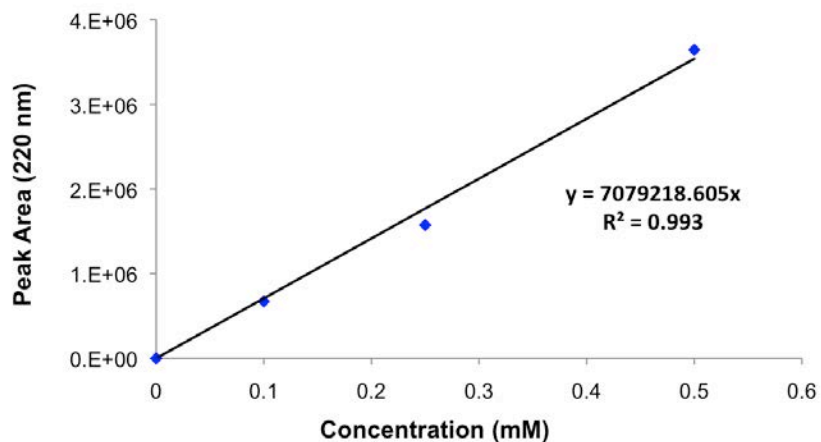

*Crude reaction traces:*

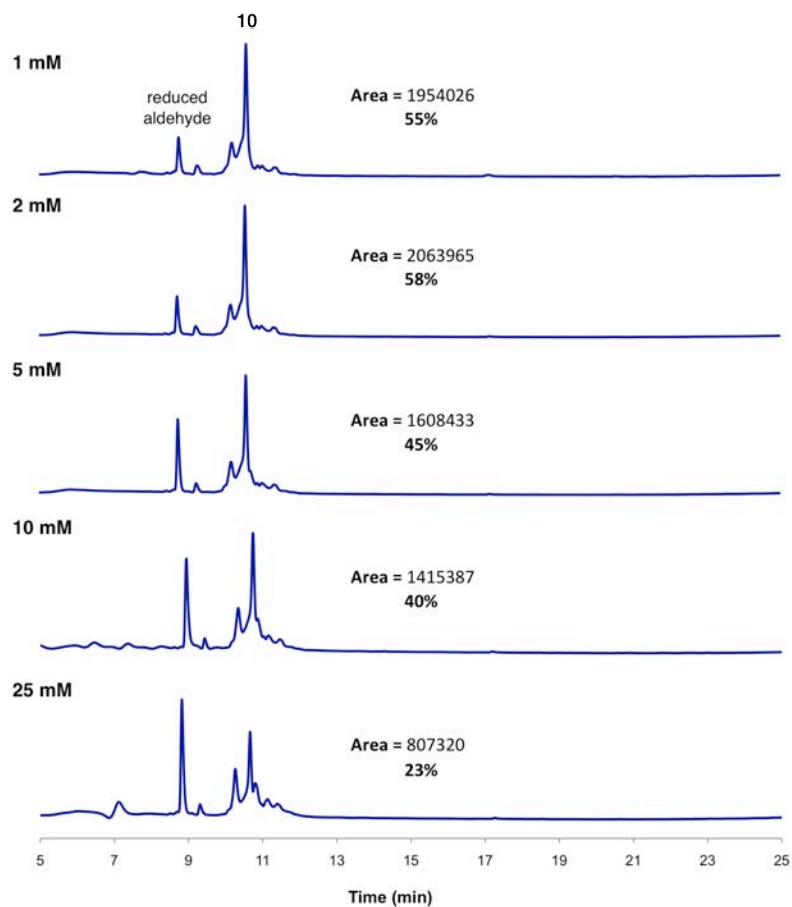

Crude analytical HPLC traces of the reductive amination of amino aldehyde **S1** to form macrocycle **10** at various reaction concentrations (5 to 100% B over 25 min,  $\lambda = 220$  nm).

## Characterization Data for Peptide Aldehydes

### Peptide S1

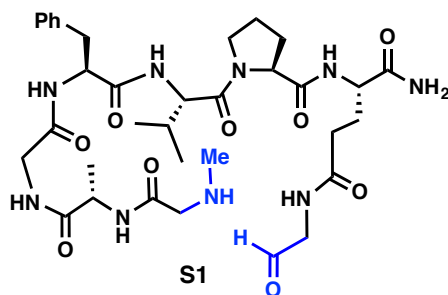

Amino aldehyde **S1** was prepared on a 30  $\mu$ mol scale on Rink amide resin using standard Fmoc-SPPS. The aldehyde was incorporated according to general procedure 1. Following cleavage from the resin and ether precipitation, the crude peptide was purified by preparative reverse-phase HPLC (15% B for 5 min, then 15% B to 50% B over 25 min) to afford peptide **S1** (10.0 mg, 46% yield based on the original resin loading) as a white solid following lyophilization.

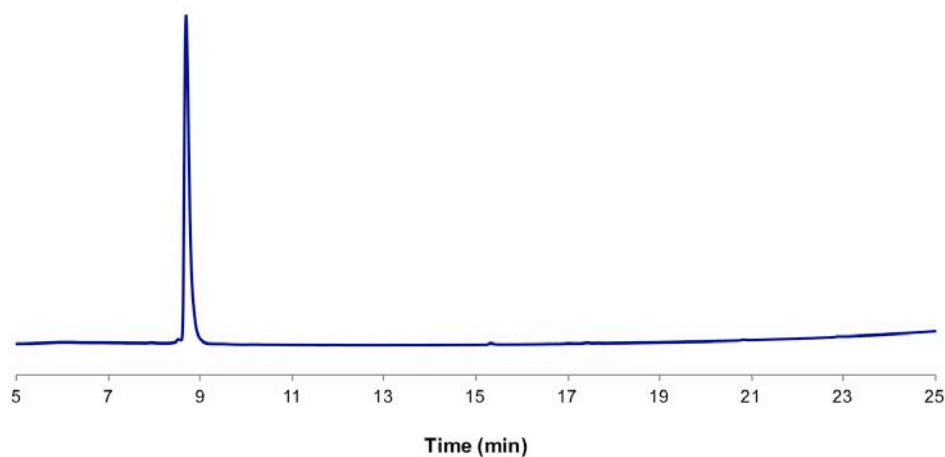

Purified peptide **S1** (Rt = 8.7 min, 5 to 100% B over 25 min,  $\lambda$  = 230 nm).

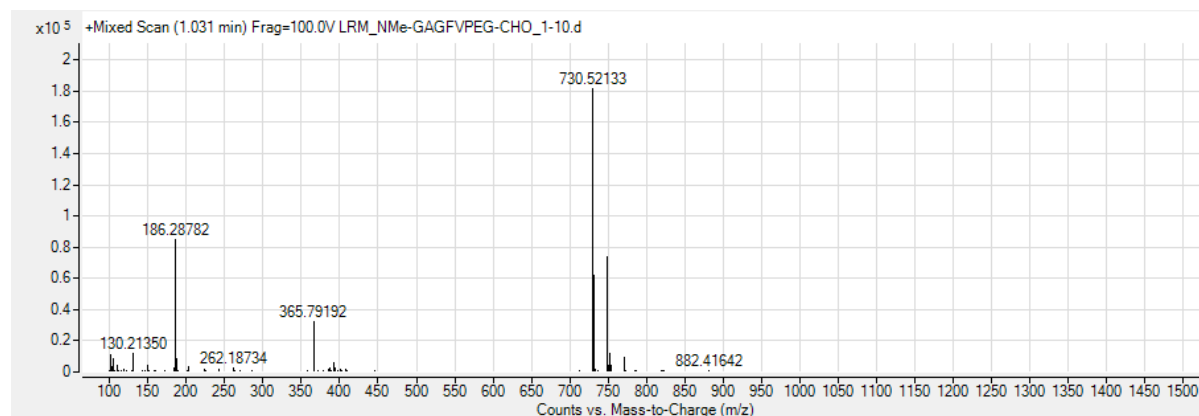

**LRMS (ESI-TOF):** calc'd for C<sub>34</sub>H<sub>52</sub>N<sub>9</sub>O<sub>9</sub> [M+H]<sup>+</sup> 730.39; found 730.52.

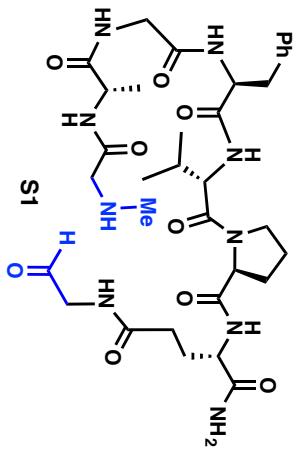

<sup>1</sup>H, DMSO-d<sub>6</sub>, 600 MHz

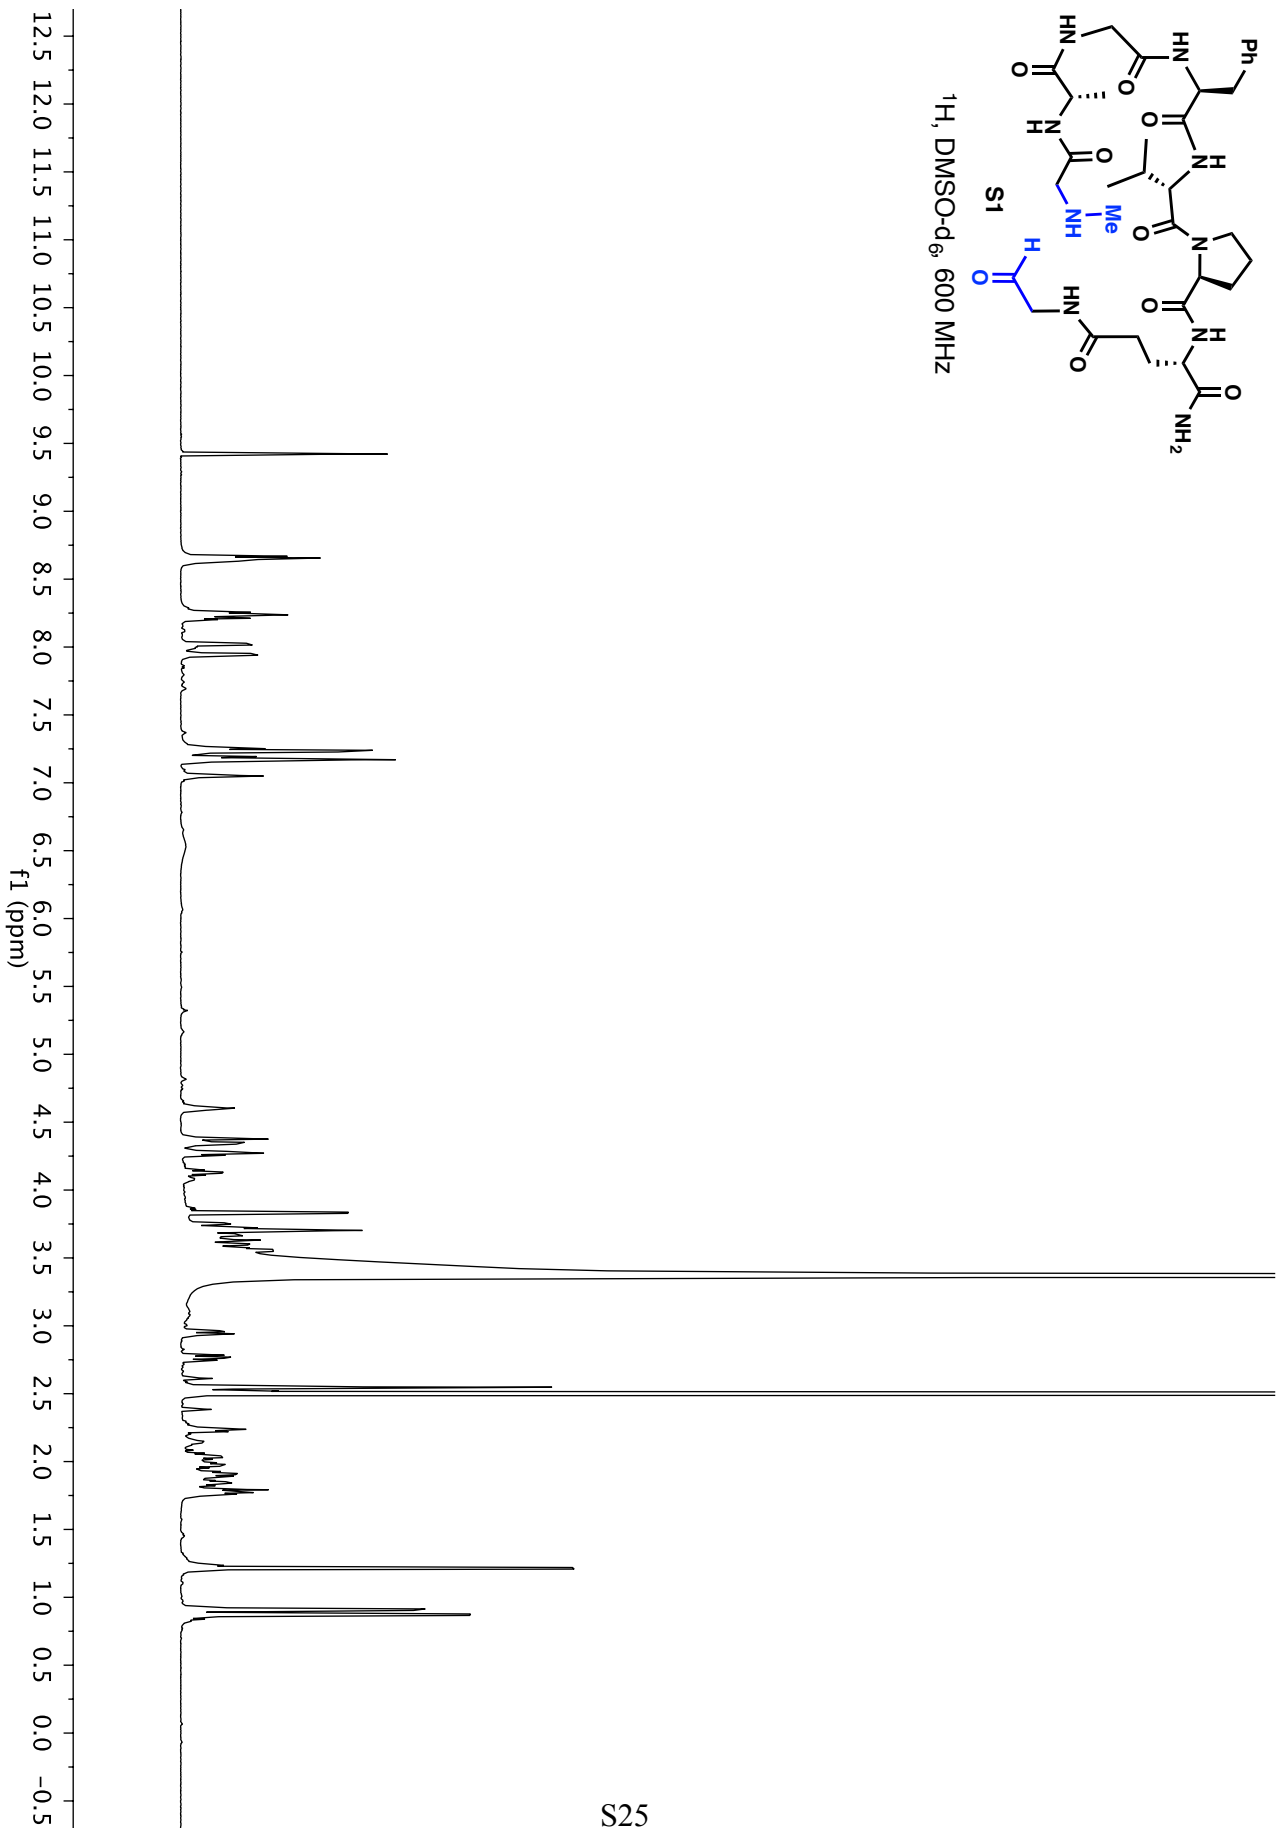

## Peptide S2

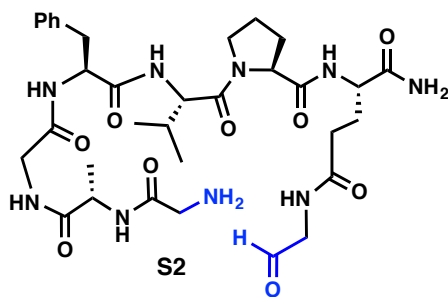

Amino aldehyde **S2** was prepared on a 50  $\mu\text{mol}$  scale on Rink amide resin using standard Fmoc-SPPS. The aldehyde was incorporated according to general procedure 1. Following cleavage from the resin and ether precipitation, the crude peptide was purified by preparative reverse-phase HPLC (5% B for 5 min, then 5% B to 35% B over 30 min) to afford peptide **S2** (8.0 mg, 22% yield based on the original resin loading) as a white solid following lyophilization.

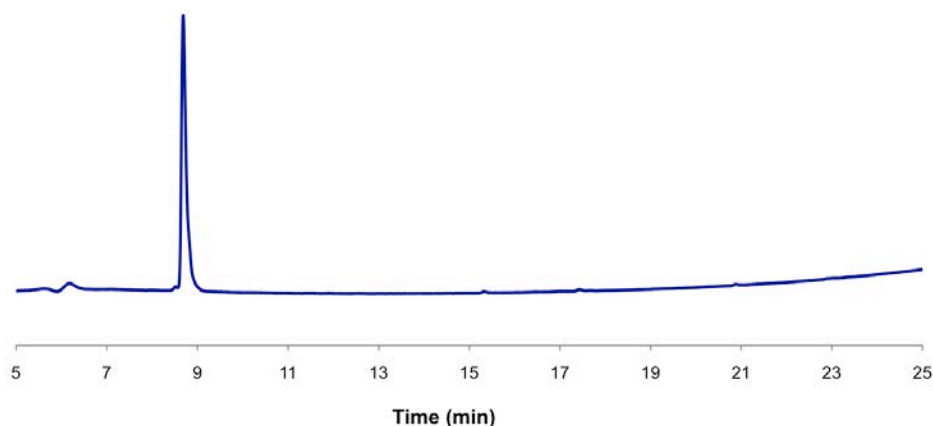

Purified peptide **S2** ( $R_t = 8.7$  min, 5 to 100% B over 25 min,  $\lambda = 230$  nm).

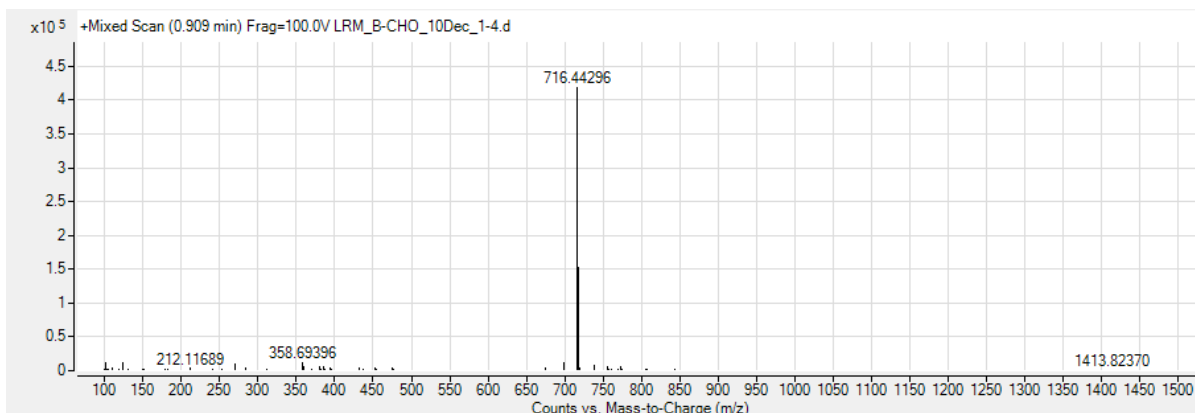

LRMS (ESI-TOF): calc'd for  $\text{C}_{33}\text{H}_{50}\text{N}_9\text{O}_9$   $[\text{M}+\text{H}]^+$  716.37; found 716.44.

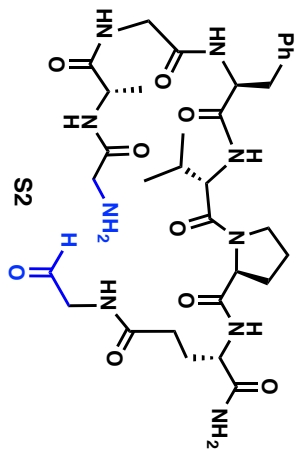

<sup>1</sup>H, D<sub>2</sub>O, 600 MHz

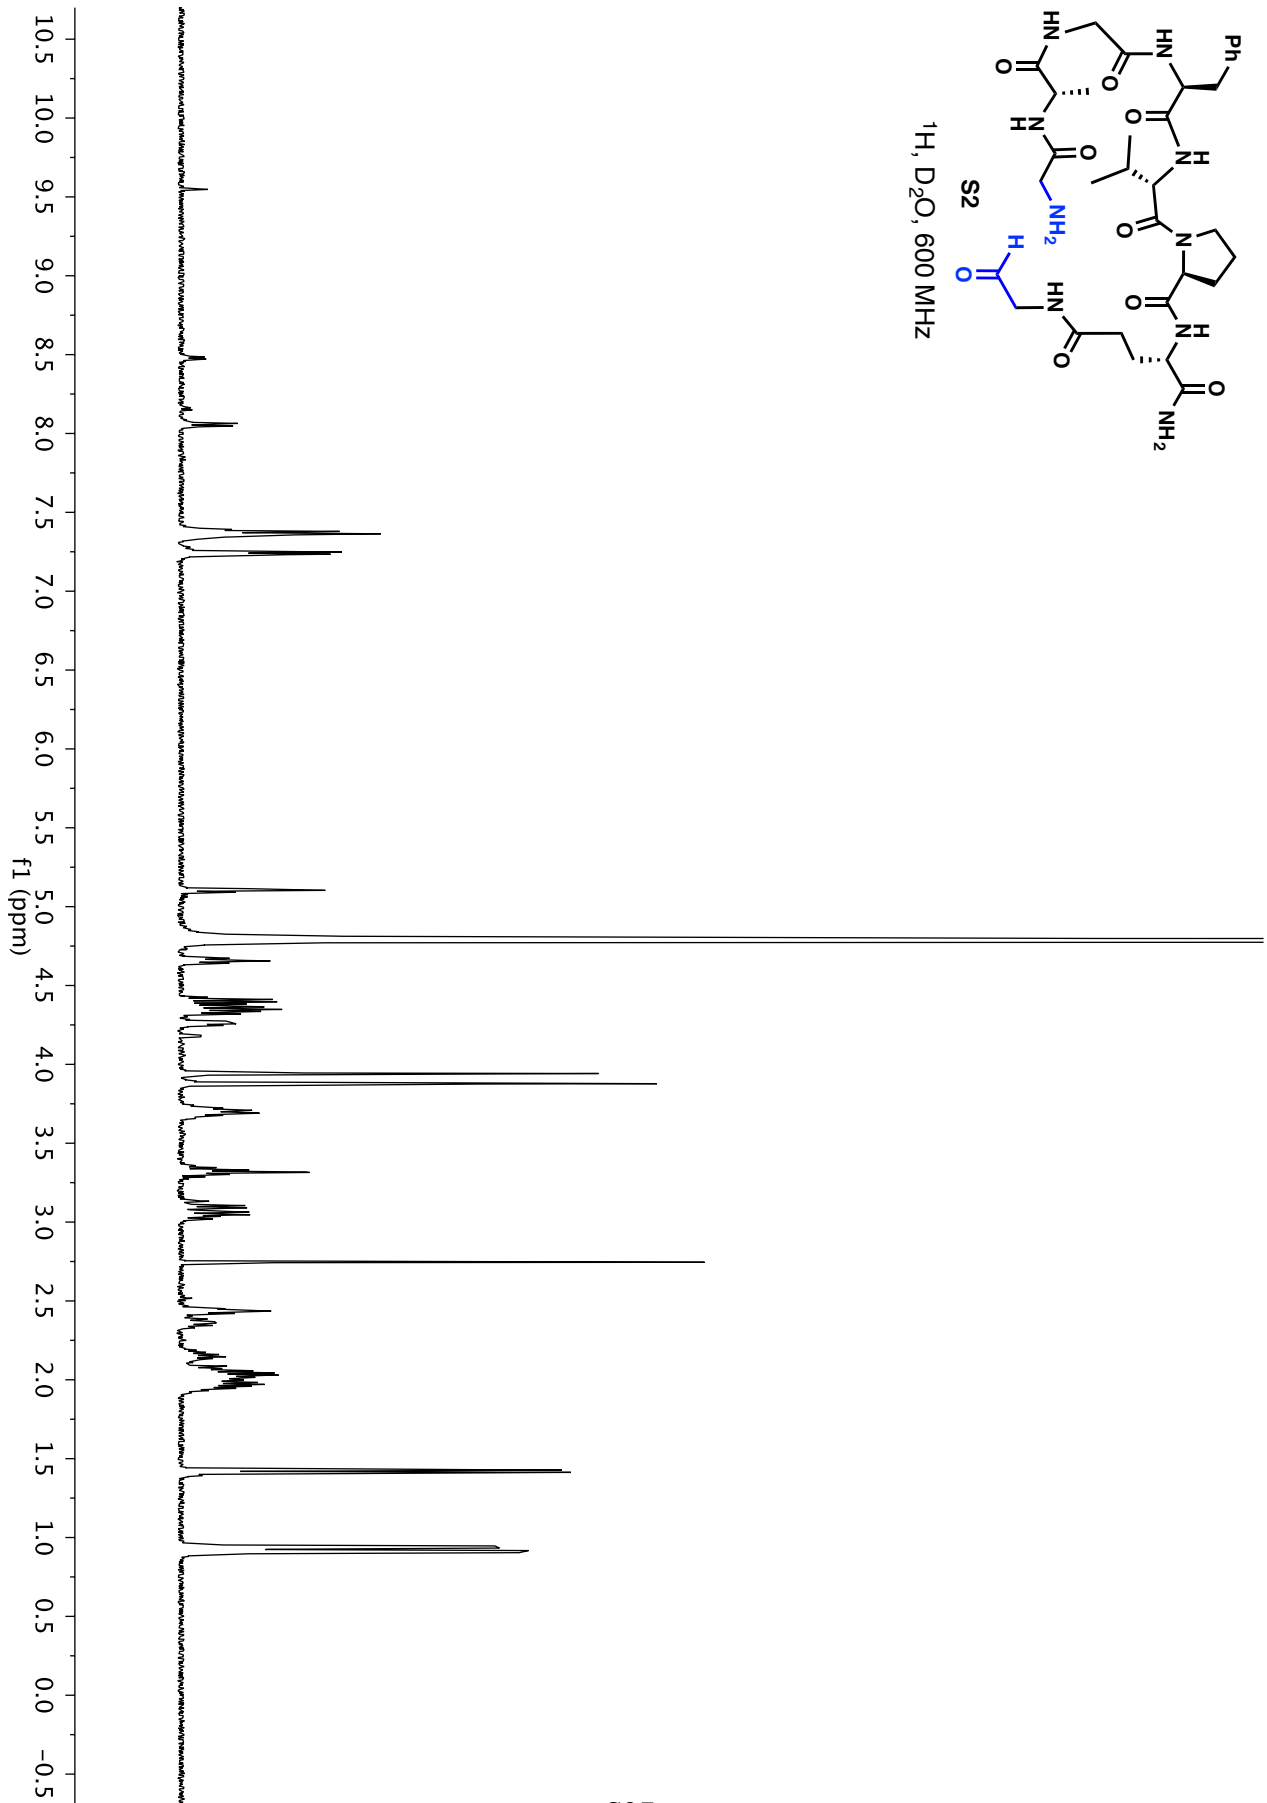

## Peptide S3

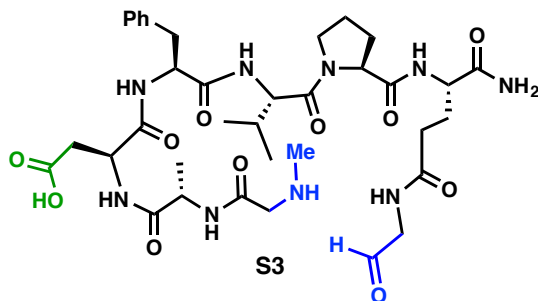

Amino aldehyde **S3** was prepared on a 62  $\mu$ mol scale on Rink amide resin using standard Fmoc-SPPS. The aldehyde was incorporated according to general procedure 1. Following cleavage from the resin and ether precipitation, the crude peptide was purified by preparative reverse-phase HPLC (5% B for 5 min, then 5% B to 40% B over 30 min) to afford peptide **S3** (16.9 mg, 35% yield based on the original resin loading) as a white solid following lyophilization.

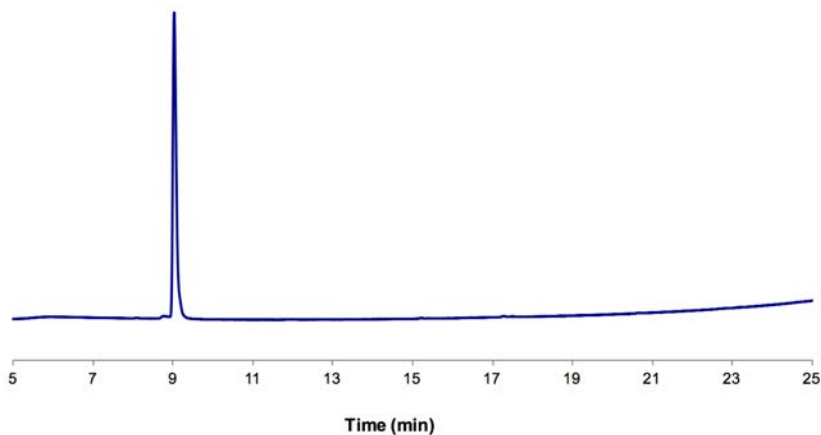

Purified peptide **S3** ( $R_t$  = 8.8 min, 5 to 100% B over 25 min,  $\lambda$  = 230 nm).

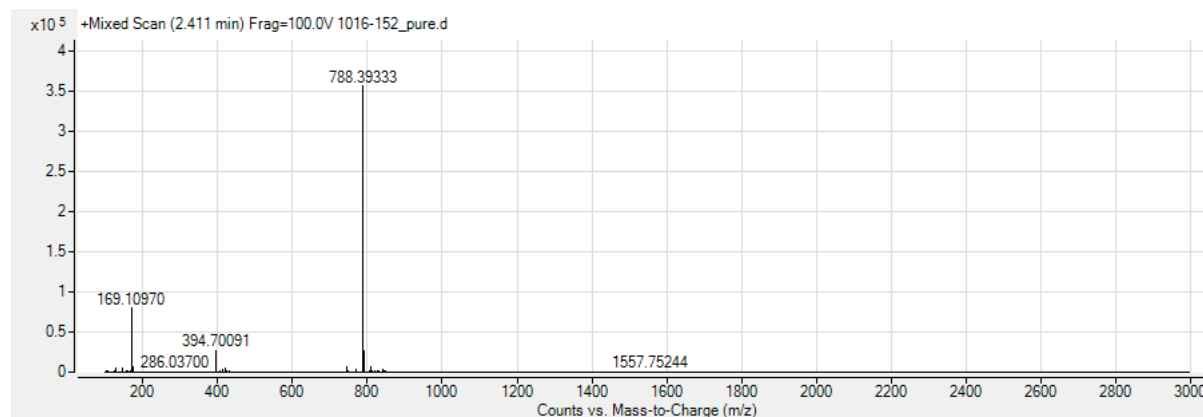

**LRMS (ESI-TOF):** calc'd for  $C_{26}H_{41}N_9O_7$   $[M+H]^+$  788.39; found 788.39.



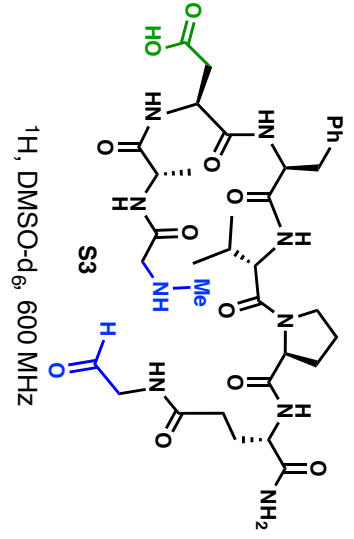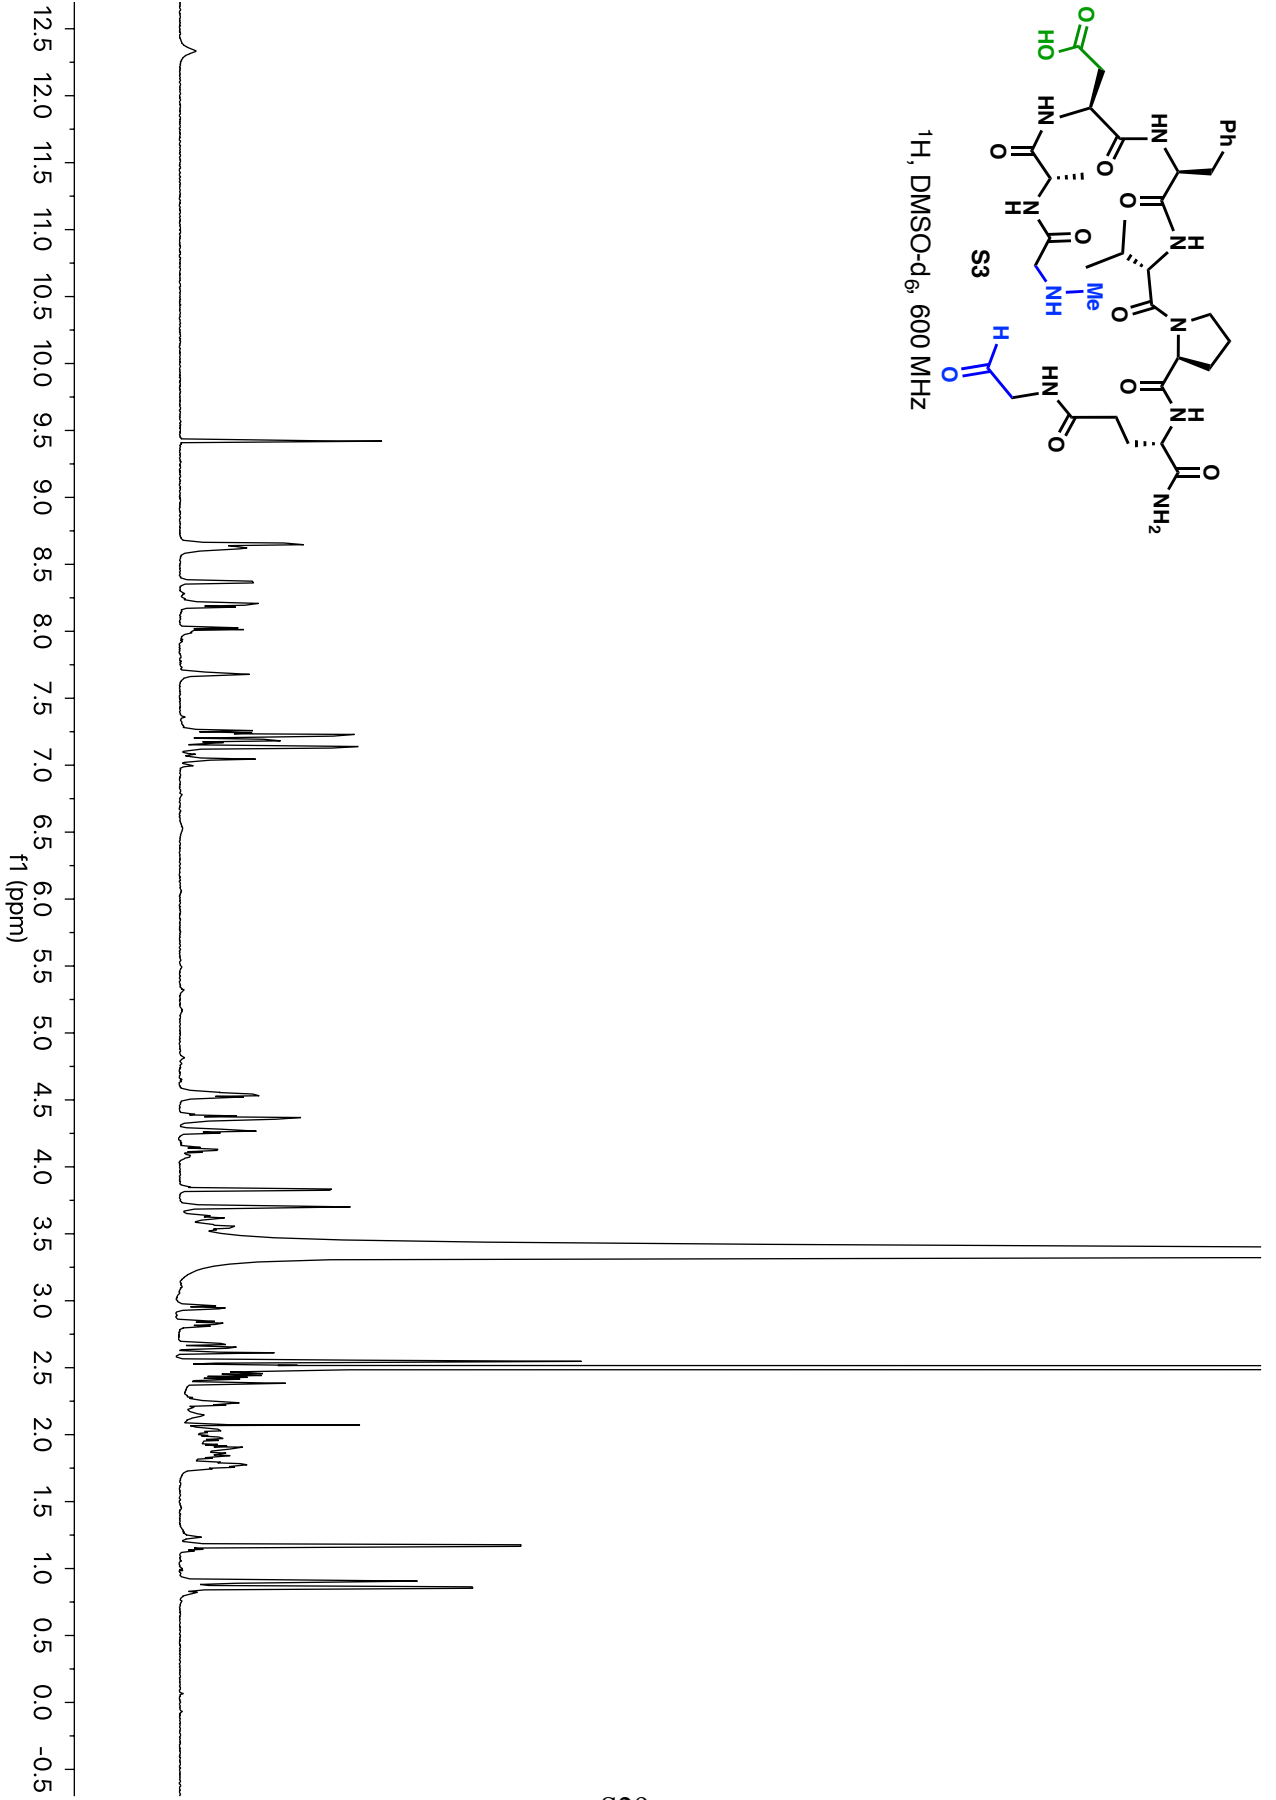

## Peptide S4

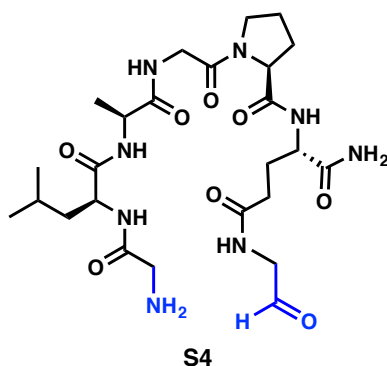

Amino aldehyde **S4** was prepared on a 170  $\mu\text{mol}$  scale on Rink amide resin using standard Fmoc-SPPS. The aldehyde was incorporated according to general procedure 1. Following cleavage from the resin and ether precipitation, the crude peptide was purified by preparative reverse-phase HPLC (5% B for 5 min, then 5% B to 40% B over 30 min) to afford peptide **S4** (30.7 mg, 31% yield based on the original resin loading) as a white solid following lyophilization.

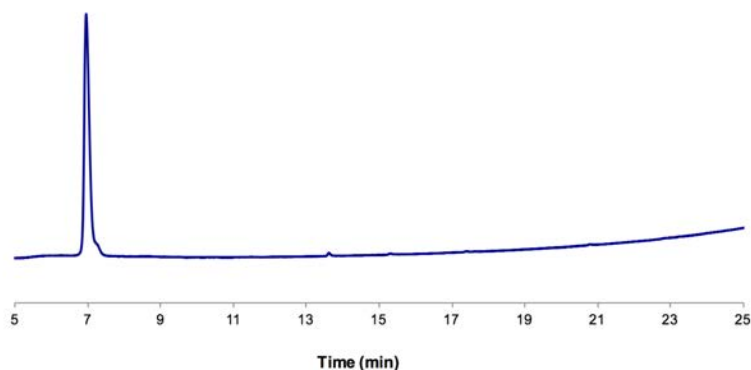

Purified peptide **S4** ( $R_t = 7.0$  min, 5 to 100% B over 25 min,  $\lambda = 230$  nm).

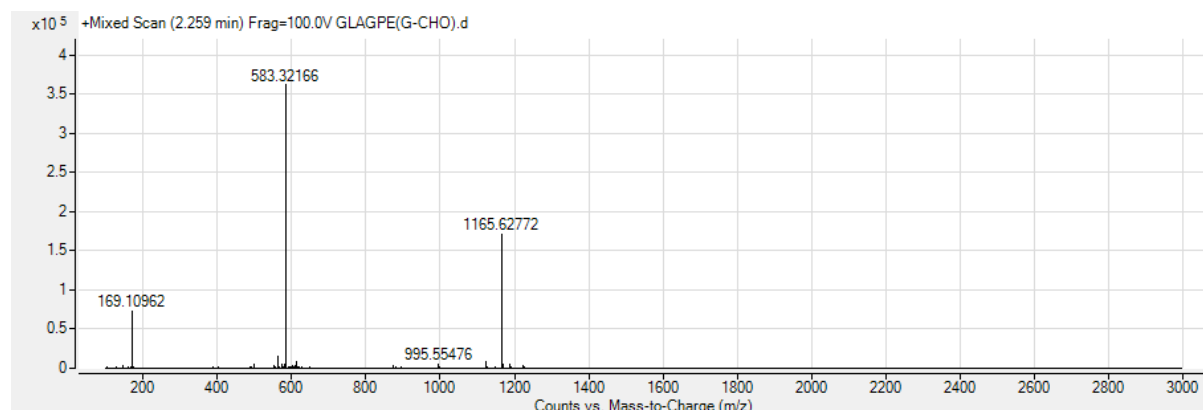

**LRMS (ESI-TOF):** calc'd for  $\text{C}_{26}\text{H}_{41}\text{N}_9\text{O}_7$   $[\text{M}+\text{H}]^+$  583.32; found 583.32.

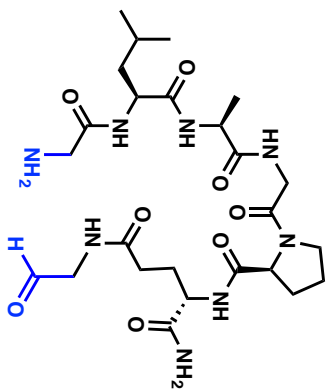

S4

$^1\text{H}$ , DMSO- $d_6$ , 600 MHz

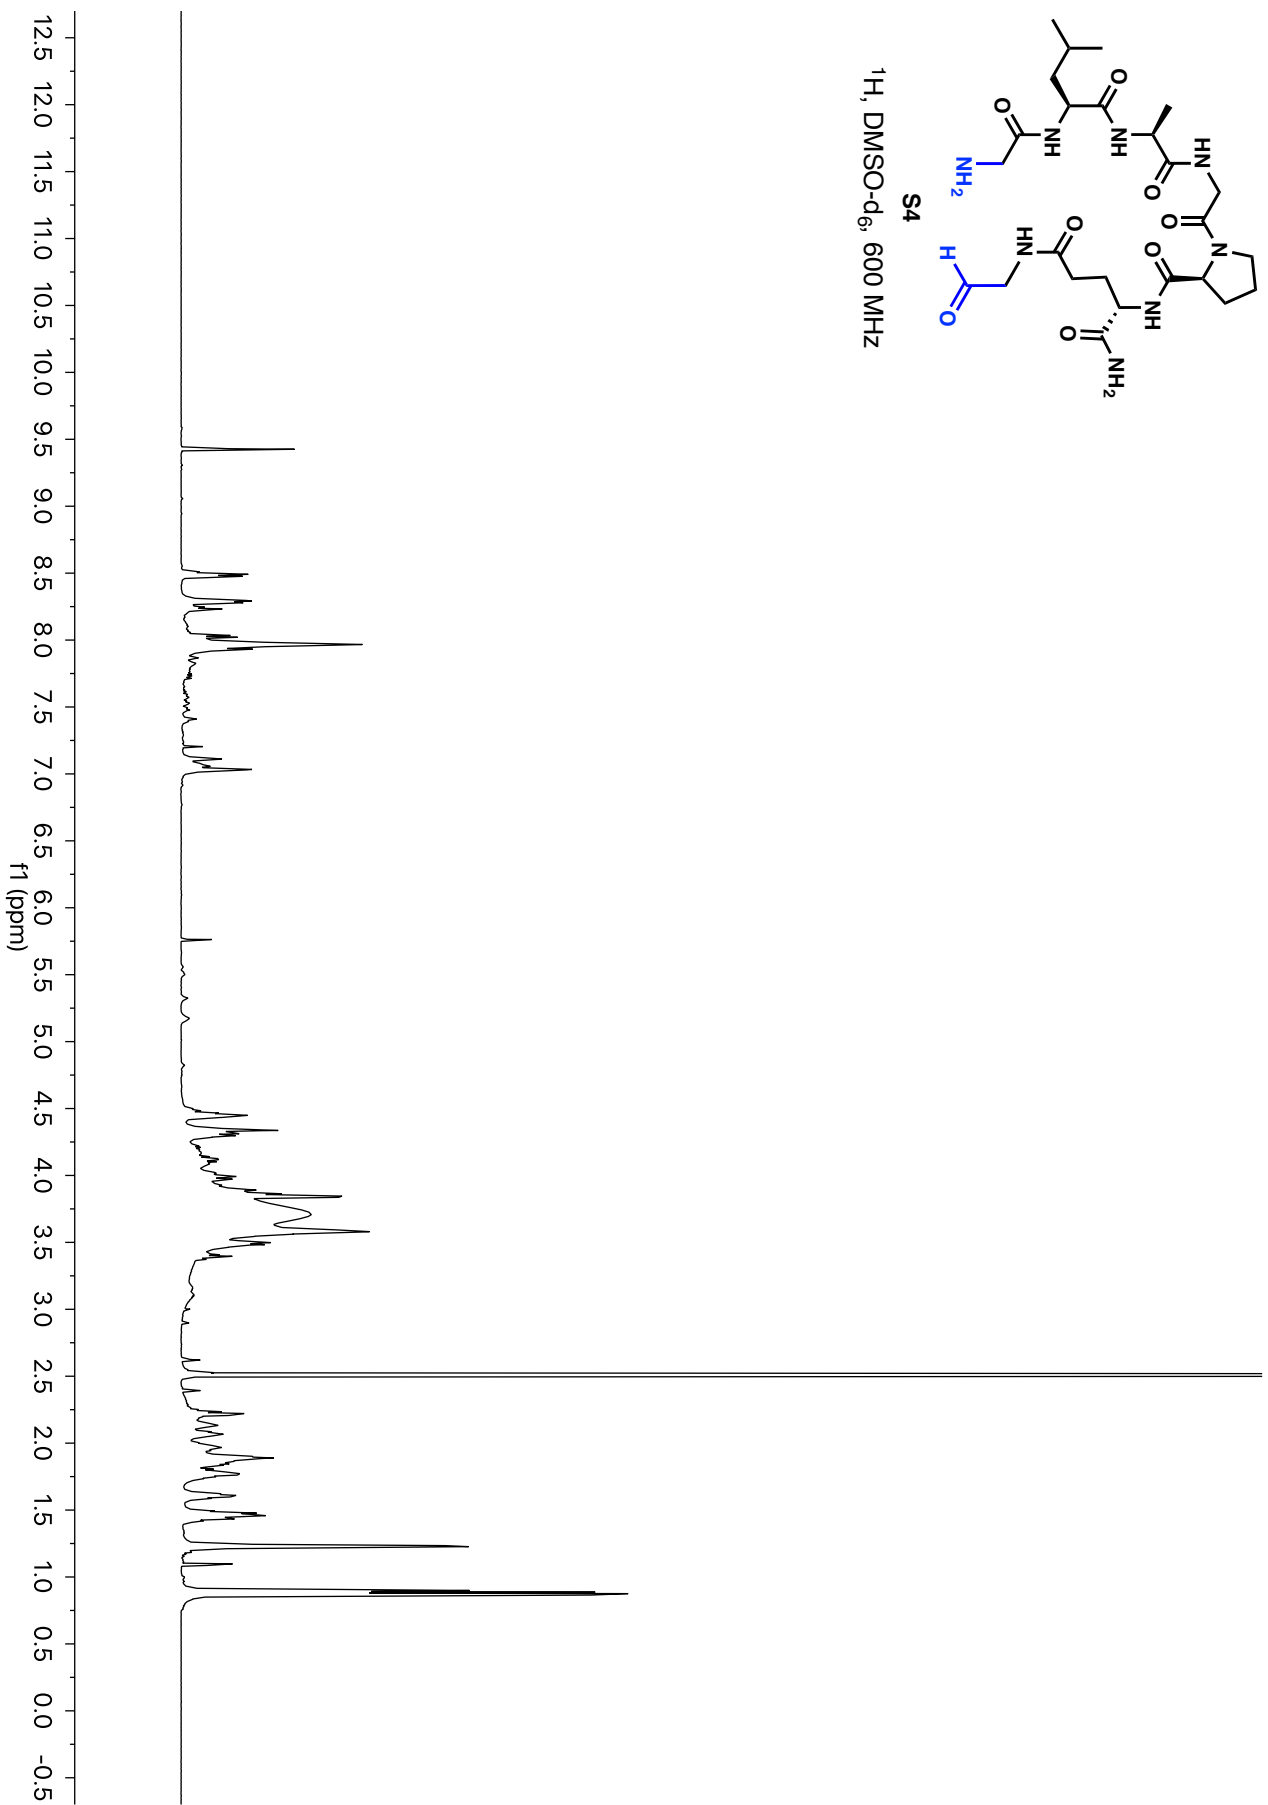

## Peptide S5

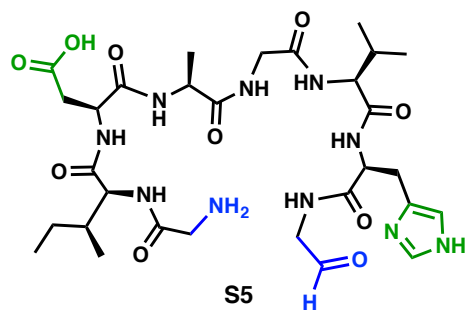

Amino aldehyde **S5** was prepared on a 70  $\mu\text{mol}$  scale according to general procedure 2b. Fmoc-Gly-CHO was loaded onto Rink TG resin and the peptide elongated using standard Fmoc-SPPS. Following cleavage from the resin and ether precipitation, the crude peptide was purified by preparative reverse-phase HPLC (5% B for 5 min, then 5% B to 40% B over 30 min) to afford peptide **S5** (31.0 mg, 63% yield based on the original resin loading) as a white solid following lyophilization.

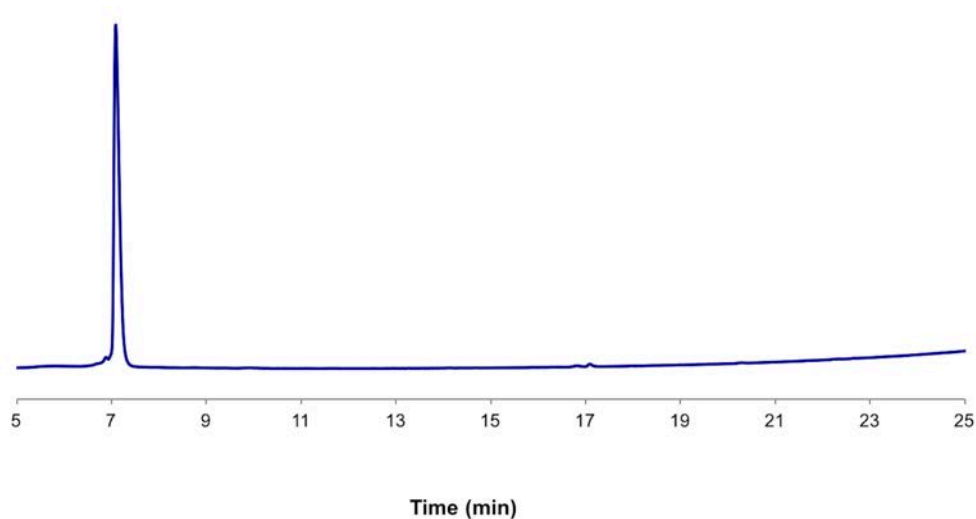

Purified peptide **S5** ( $R_t = 7.1$  min, 5 to 100% B over 25 min,  $\lambda = 210$  nm).

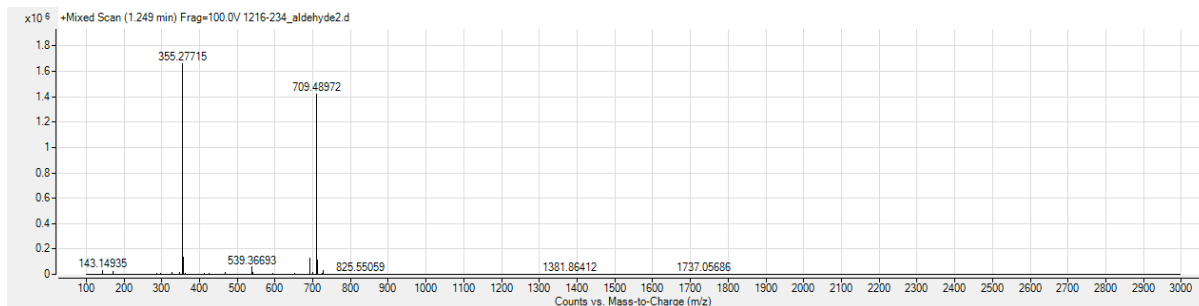

**LRMS (ESI-TOF):** calc'd for  $\text{C}_{26}\text{H}_{40}\text{N}_5\text{O}_5$   $[\text{M}+\text{H}]^+$  709.36; found 709.49,  $[\text{M}+2\text{H}]^{2+}$  355.19; found 355.28.

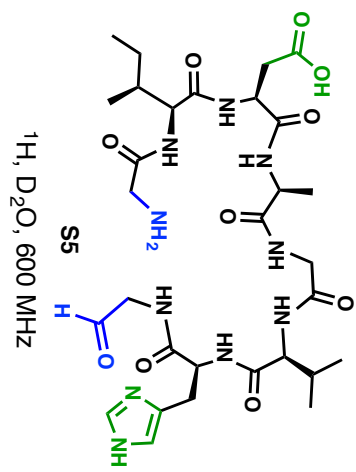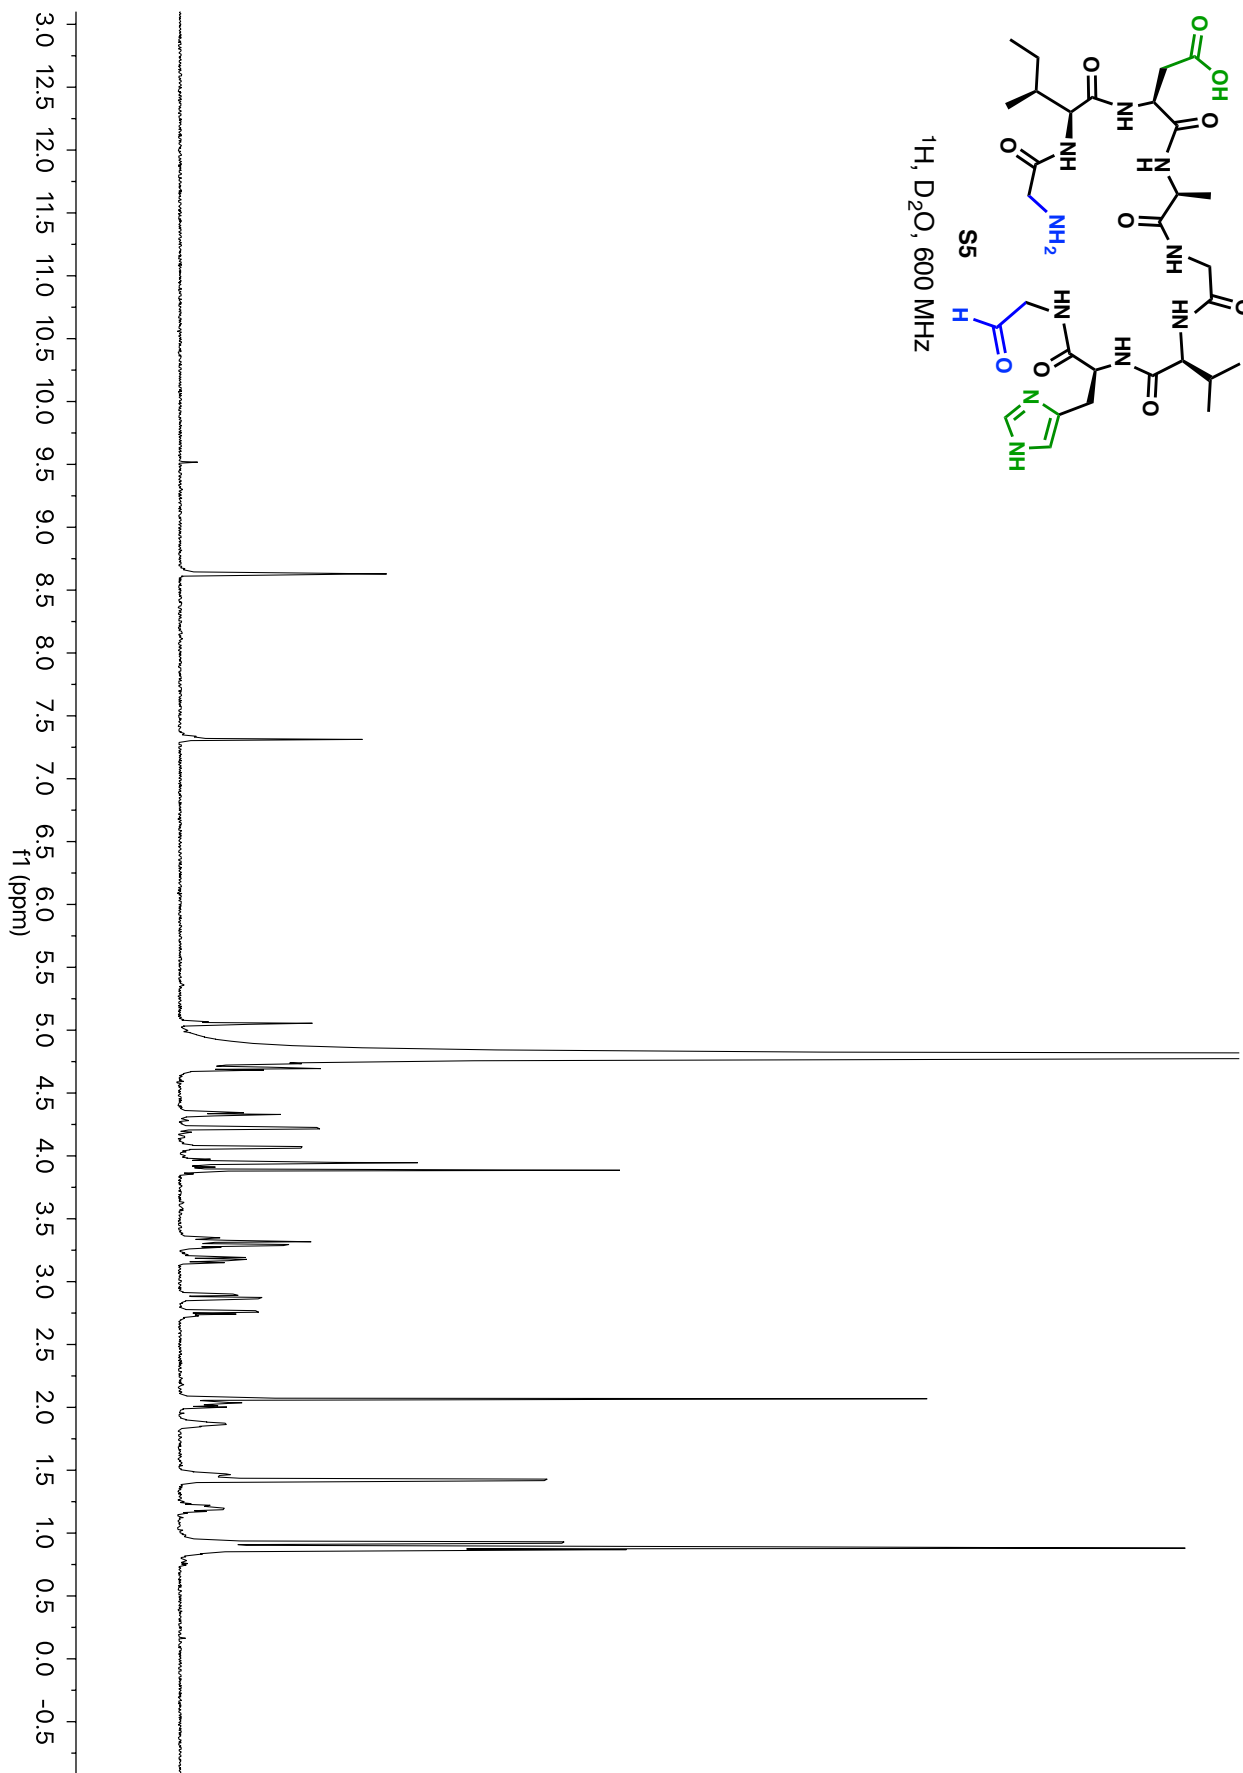

## Peptide S6

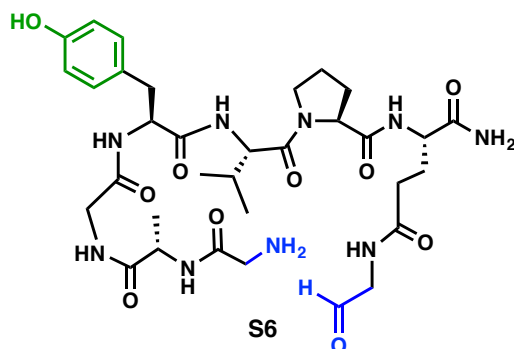

Amino aldehyde **S6** was prepared on a 25  $\mu\text{mol}$  scale on Rink amide resin using standard Fmoc-SPPS. The aldehyde was incorporated according to general procedure 1. Following cleavage from the resin and ether precipitation, the crude peptide was purified by preparative reverse-phase HPLC (5% B for 5 min, then 5% B to 40% B over 30 min) to afford peptide **S6** (3.2 mg, 17% yield based on the original resin loading) as a white solid following lyophilization.

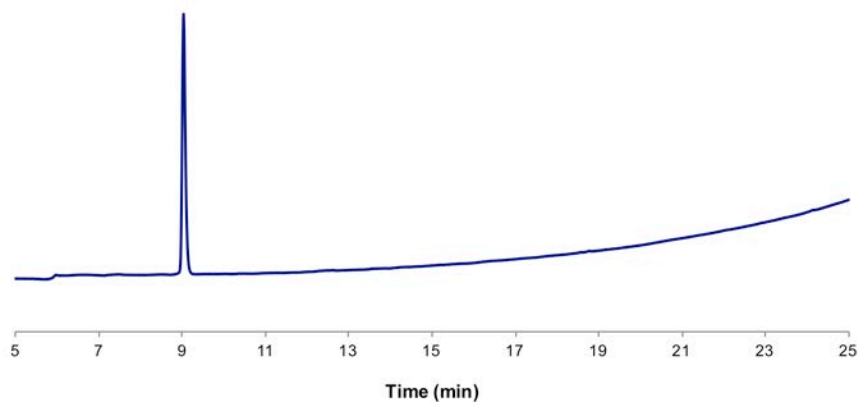

Purified peptide **S6** ( $R_t = 9.0$  min, 0 to 100% B over 25 min,  $\lambda = 230$  nm).

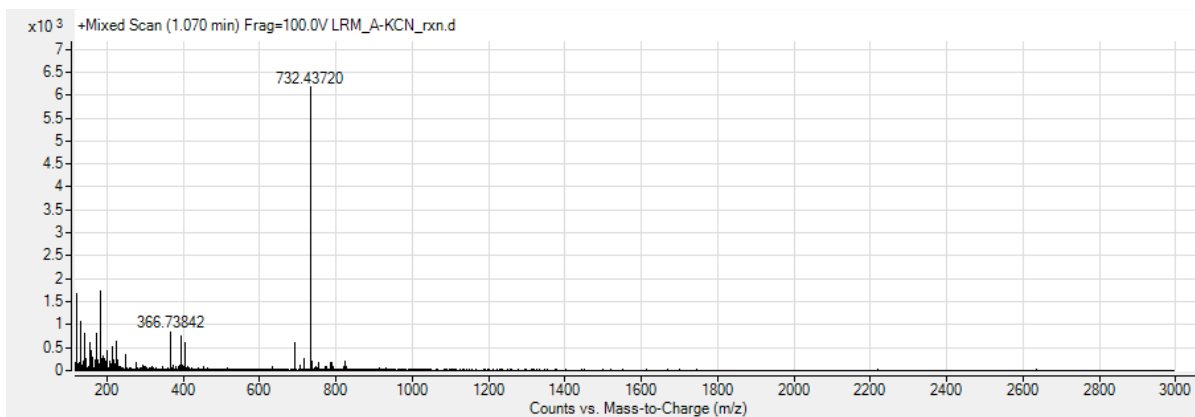

LRMS (ESI-TOF): calc'd for  $\text{C}_{33}\text{H}_{50}\text{N}_9\text{O}_{10}$   $[\text{M}+\text{H}]^+$  732.37; found 732.44.

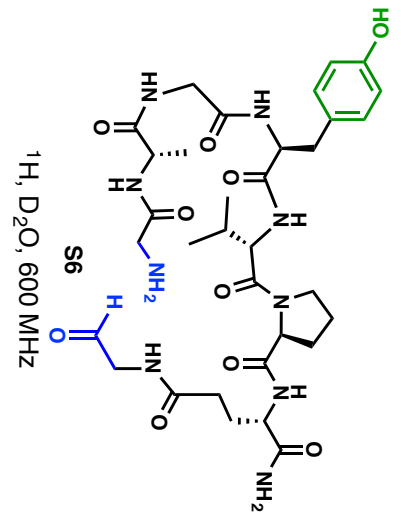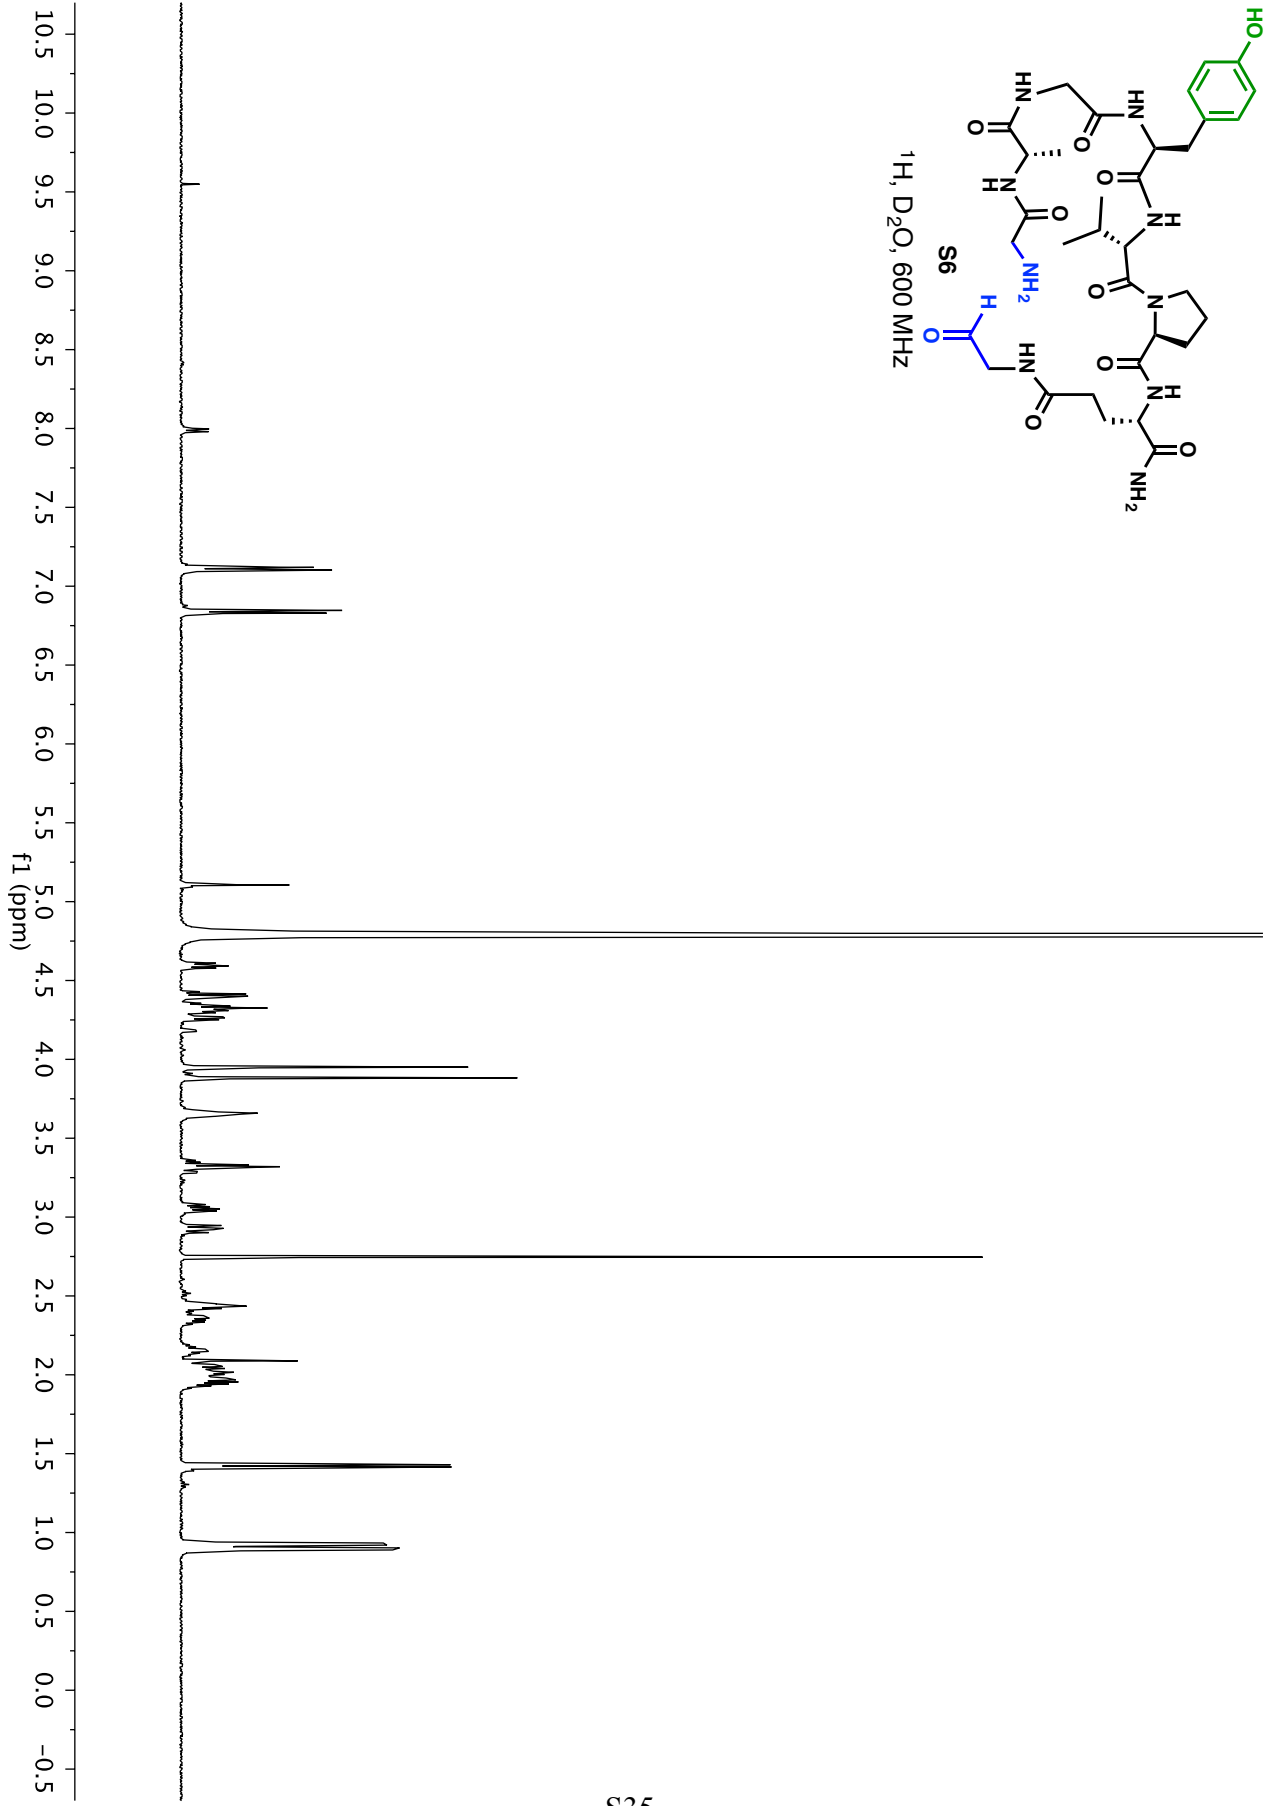

## Peptide S7

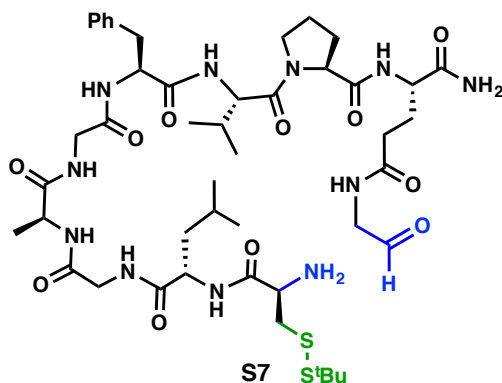

Amino aldehyde **S7** was prepared on a 50  $\mu$ mol scale on Rink amide resin using standard Fmoc-SPPS. The aldehyde was incorporated according to general procedure 1. Following cleavage from the resin and ether precipitation, the crude peptide was purified by preparative reverse-phase HPLC (20% B for 5 min, then 20% B to 55% B over 30 min) to afford peptide **S7** (8.1 mg) and a peptide epimer at the Cys(S<sup>t</sup>Bu) residue (4.6 mg) in 25% combined yield based on the original resin loading and as white solids following lyophilization.

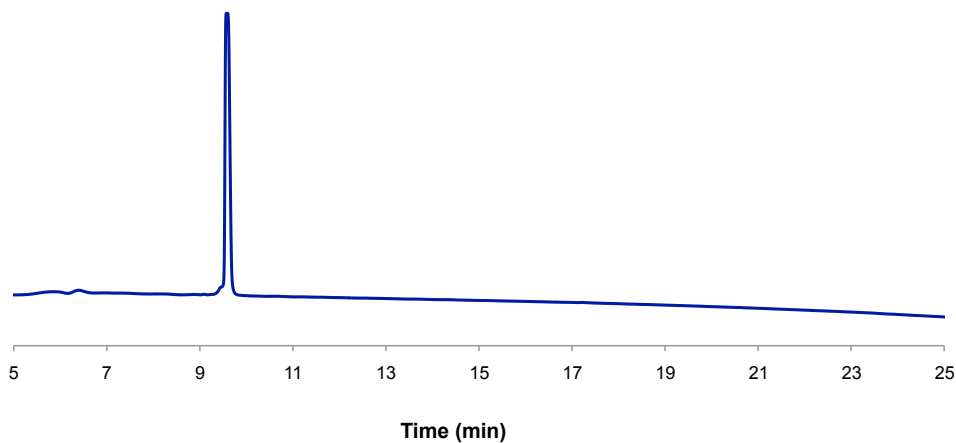

Purified peptide **S7** (Rt = 9.6 min, 5 to 100% B over 25 min,  $\lambda$  = 210 nm).



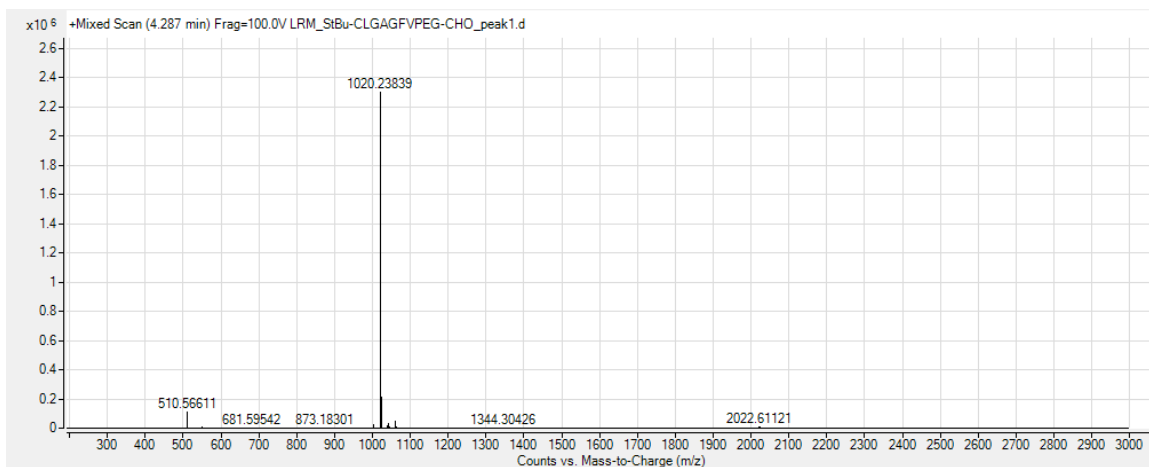

**LRMS (ESI-TOF):** calc'd for  $C_{46}H_{74}N_{11}O_{11}S_2$   $[M+H]^+$  1020.50; found 1020.24.

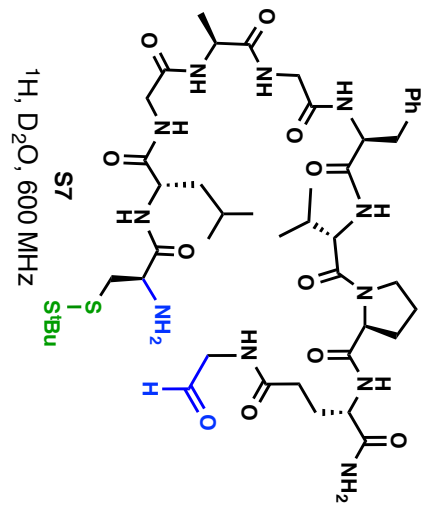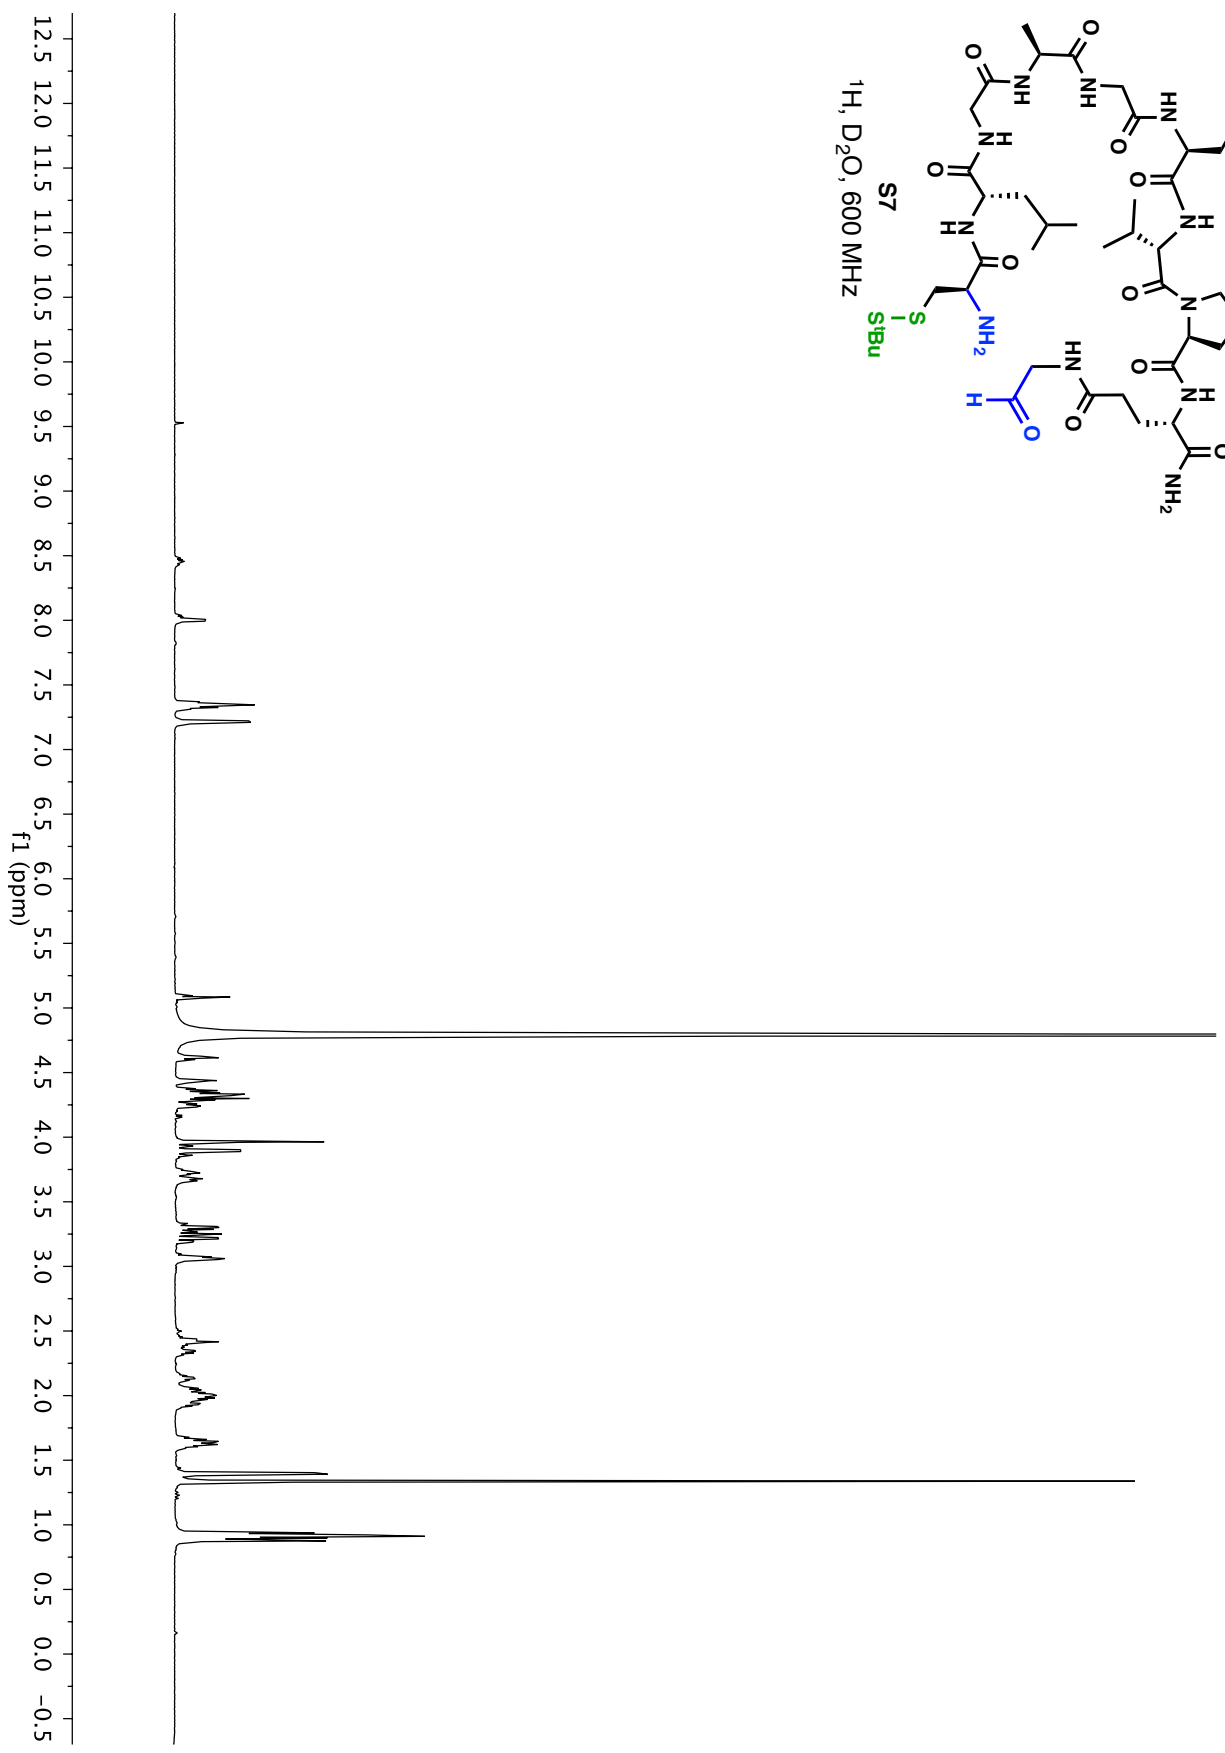

## Peptide S8

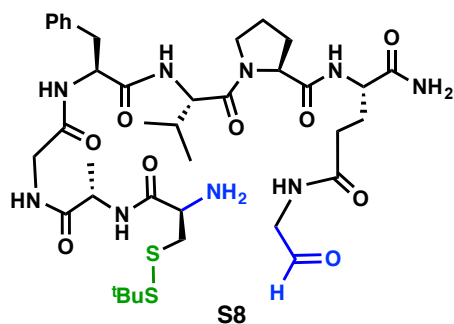

Amino aldehyde **S8** was prepared on a 23  $\mu\text{mol}$  scale on Rink amide resin using standard Fmoc-SPPS. The aldehyde was incorporated according to general procedure 1. Following cleavage from the resin and ether precipitation, the crude peptide was purified by preparative reverse-phase HPLC (15% B for 5 min, then 15% B to 60% B over 30 min) to afford peptide **S8** (6.2 mg, 32% yield based on the original resin loading) as a white solid following lyophilization.

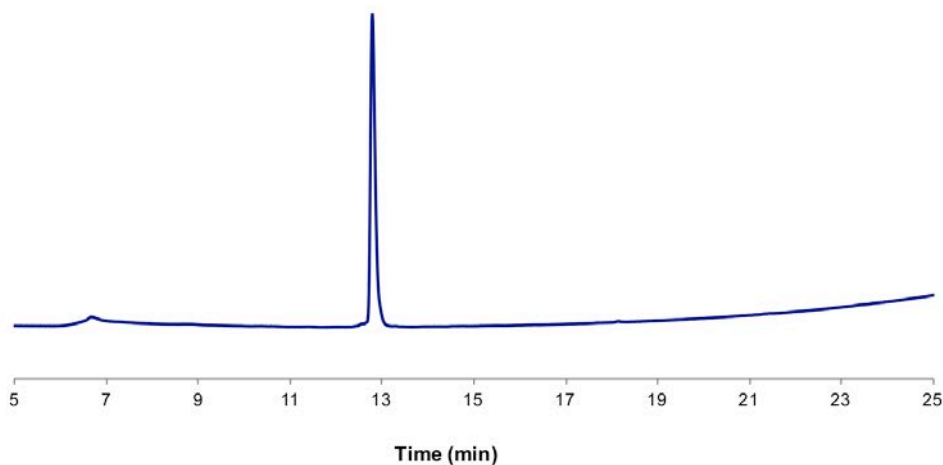

Purified peptide **S8** ( $R_t = 12.8$  min, 5 to 100% B over 25 min,  $\lambda = 230$  nm).

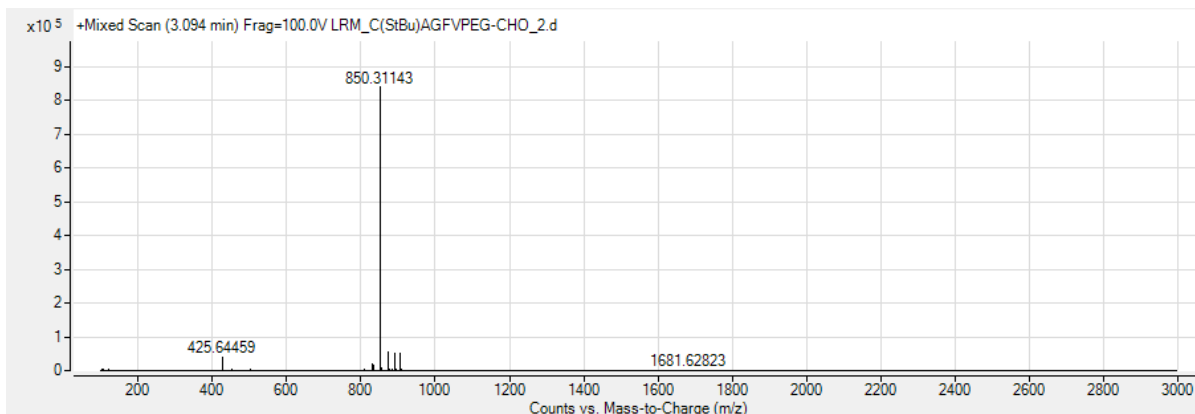

LRMS (ESI-TOF): calc'd for  $\text{C}_{38}\text{H}_{60}\text{N}_9\text{O}_9\text{S}_2$   $[\text{M}+\text{H}]^+$  850.40; found 850.31.

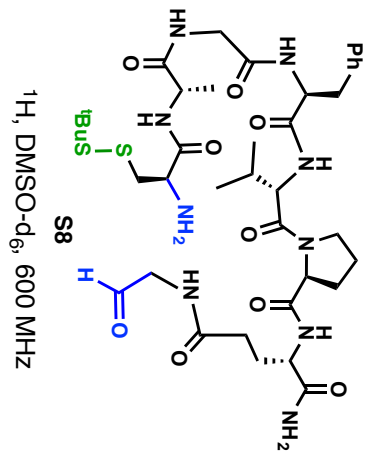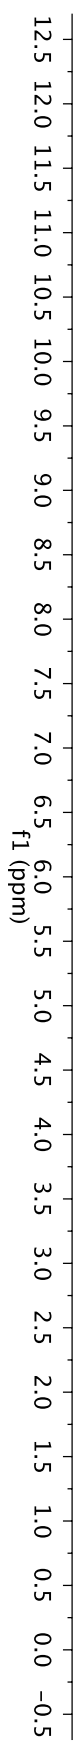

## Peptide S9

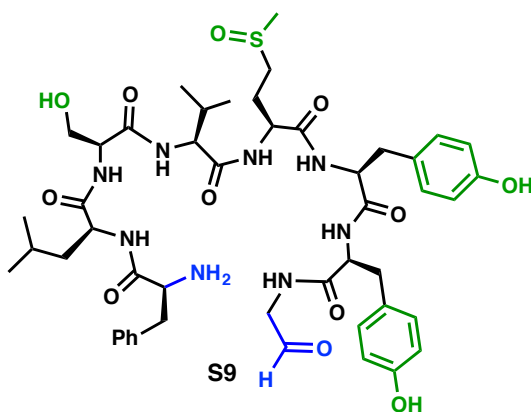

Amino aldehyde **S9** was prepared on a 35  $\mu$ mol scale according to general procedure 2b. Fmoc-Gly-CHO was loaded onto Rink TG resin and the peptide elongated using standard Fmoc-SPPS. Following cleavage from the resin and ether precipitation, the crude peptide was purified by preparative reverse-phase HPLC (20% B for 5 min, then 20% B to 60% B over 30 min) to afford peptide **S9** (6.8 mg) and a reduced Met variant (2.0 mg) in 26% combined yield based on the original resin loading and as white solids following lyophilization.

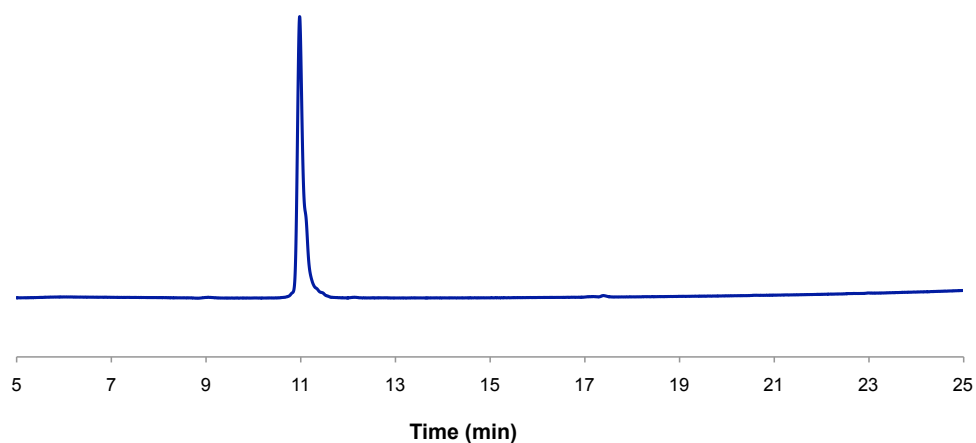

Purified peptide **S9** ( $R_t = 11.0$  min, 5 to 100% B over 25 min,  $\lambda = 230$  nm).

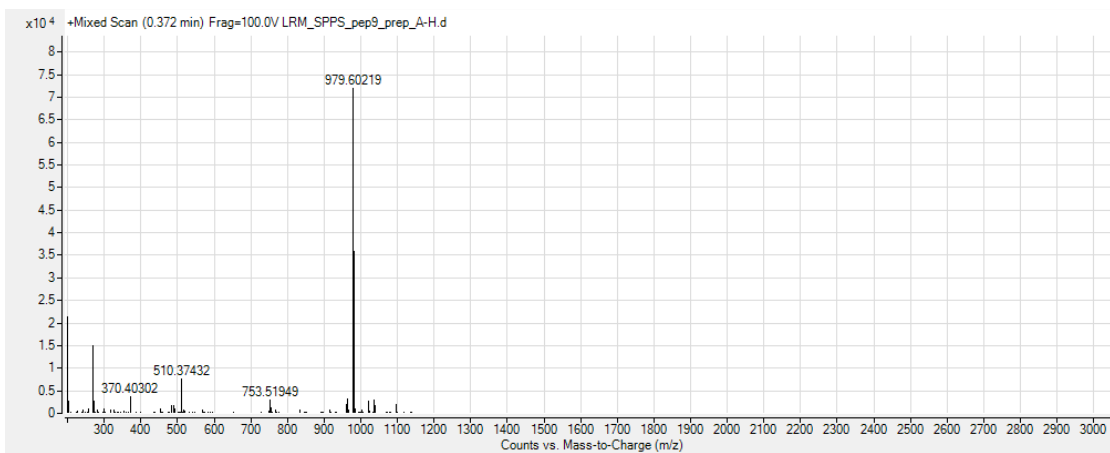

**LRMS (ESI-TOF):** calc'd for  $C_{48}H_{67}N_8O_{12}S [M+H]^+$  979.46; found 979.60.

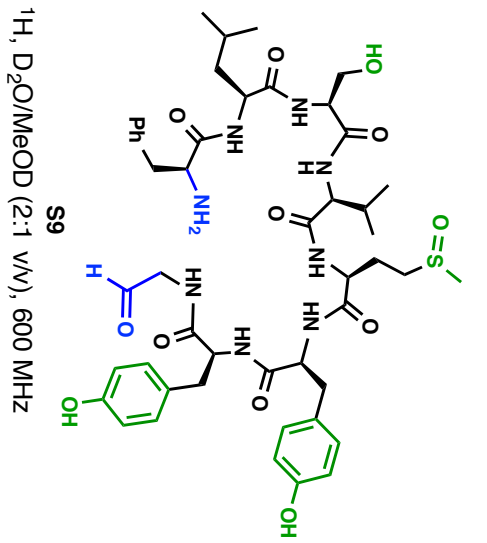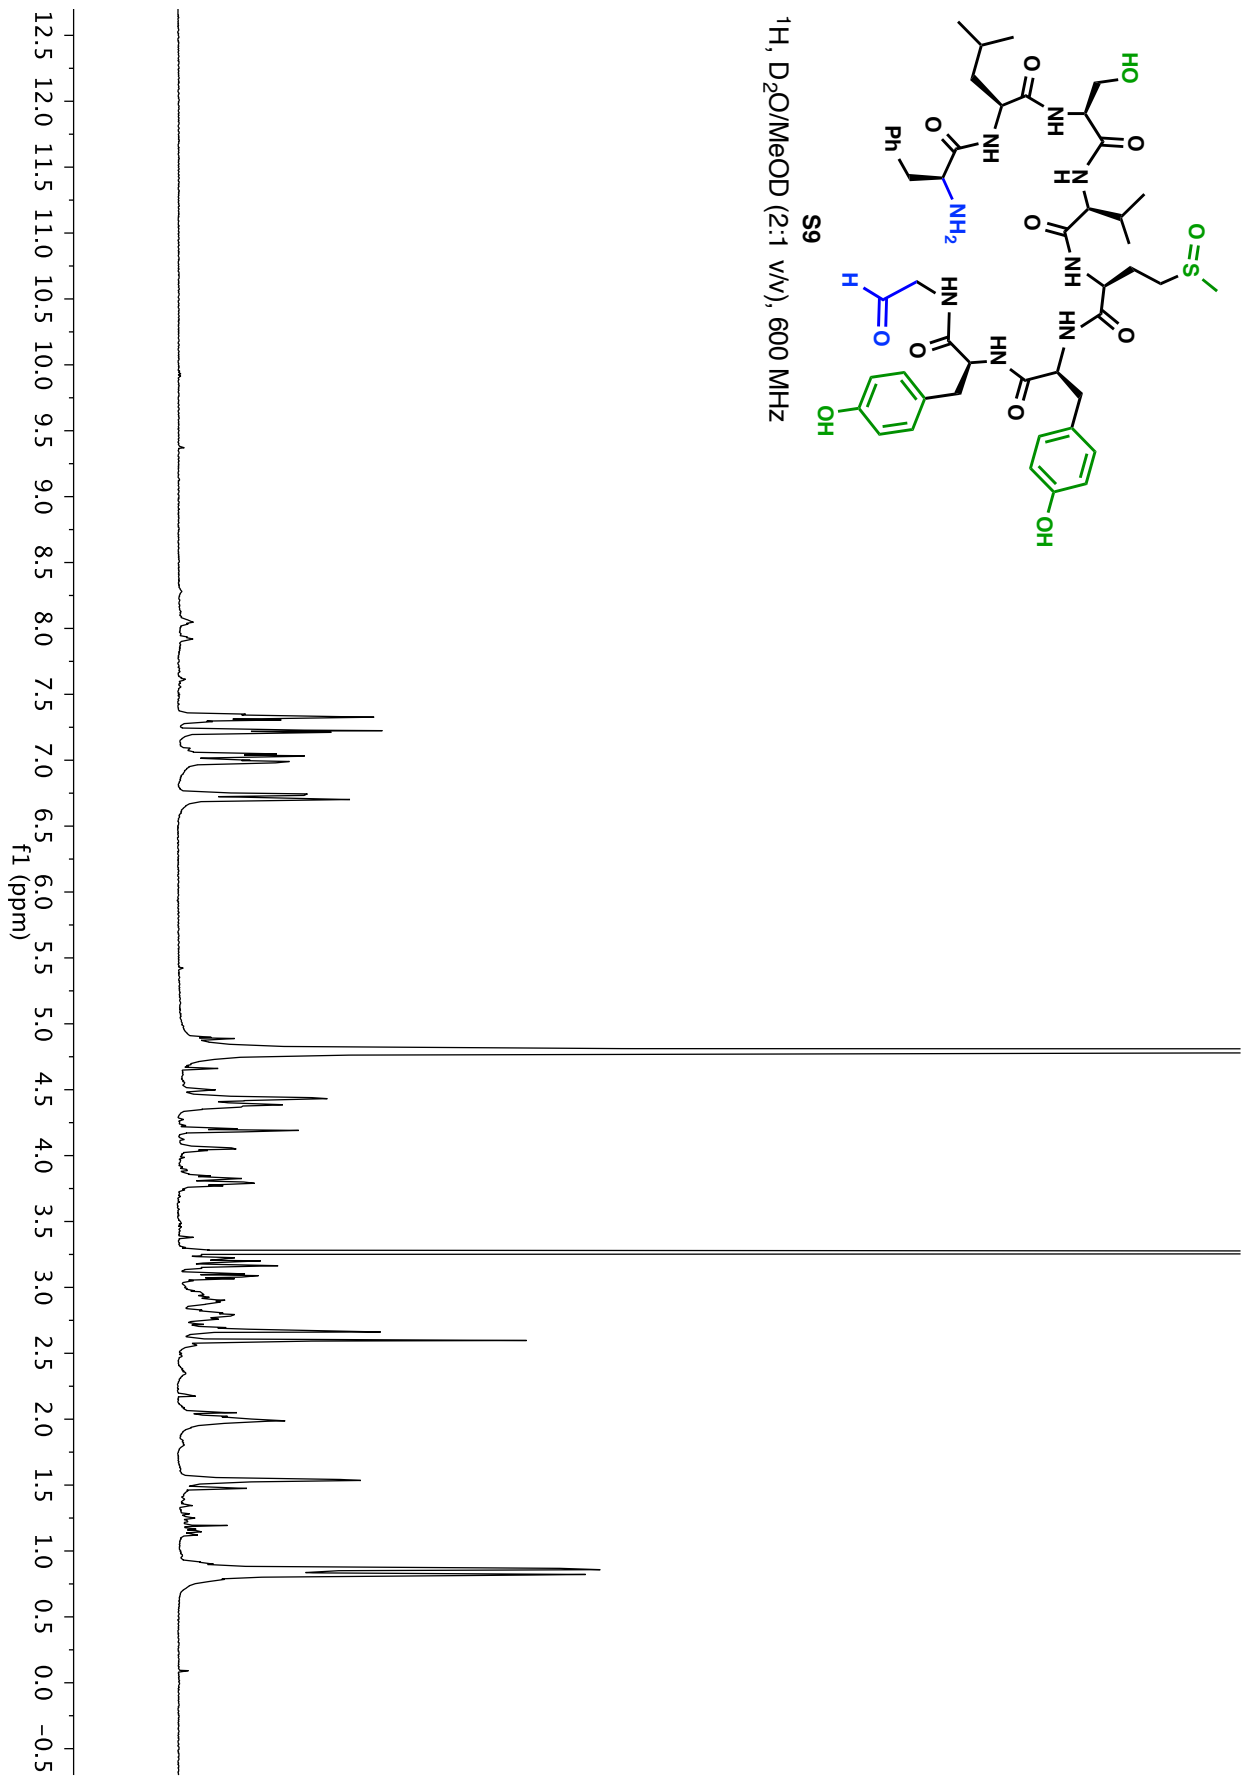

## Peptide S10

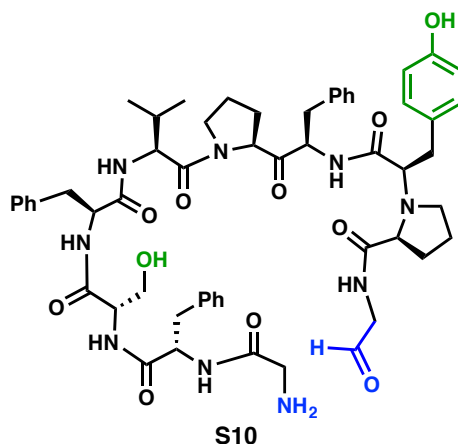

Amino aldehyde **S10** was prepared on a 35  $\mu\text{mol}$  scale according to general procedure 2b. Fmoc-Gly-CHO was loaded onto Rink TG resin and the peptide elongated using standard Fmoc-SPPS. Following cleavage from the resin and ether precipitation, the crude peptide was purified by preparative reverse-phase HPLC (35% B for 5 min, then 35% B to 75% B over 30 min) to afford peptide **S10** (17.1 mg, 45% yield based on the original resin loading) as a white solid following lyophilization.

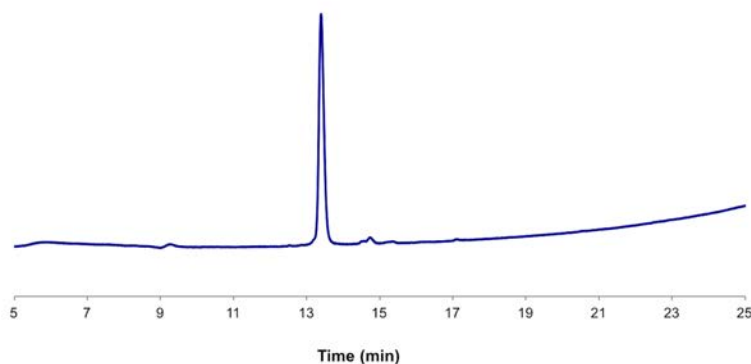

Purified peptide **S10** (Rt = 13.4 min, 5 to 100% B over 25 min,  $\lambda = 210$  nm).

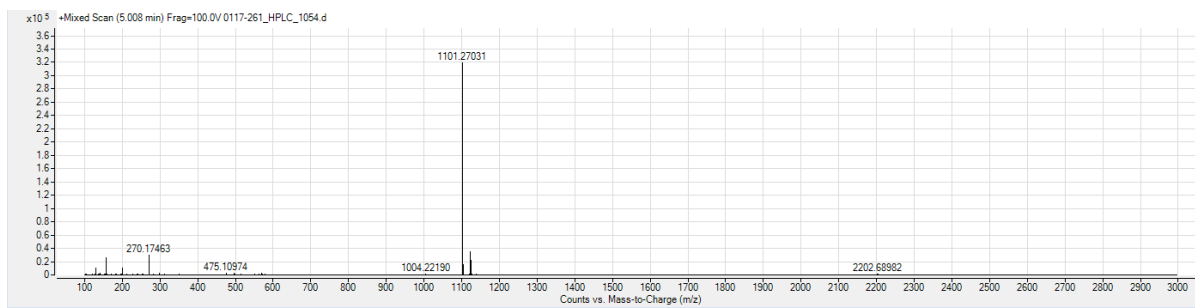

**LRMS (ESI-TOF):** calc'd for  $\text{C}_{26}\text{H}_{40}\text{N}_5\text{O}_5$   $[\text{M}+\text{H}]^+$  1101.54; found 1101.27.



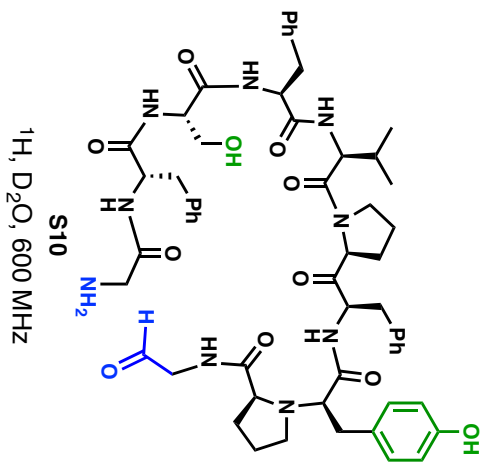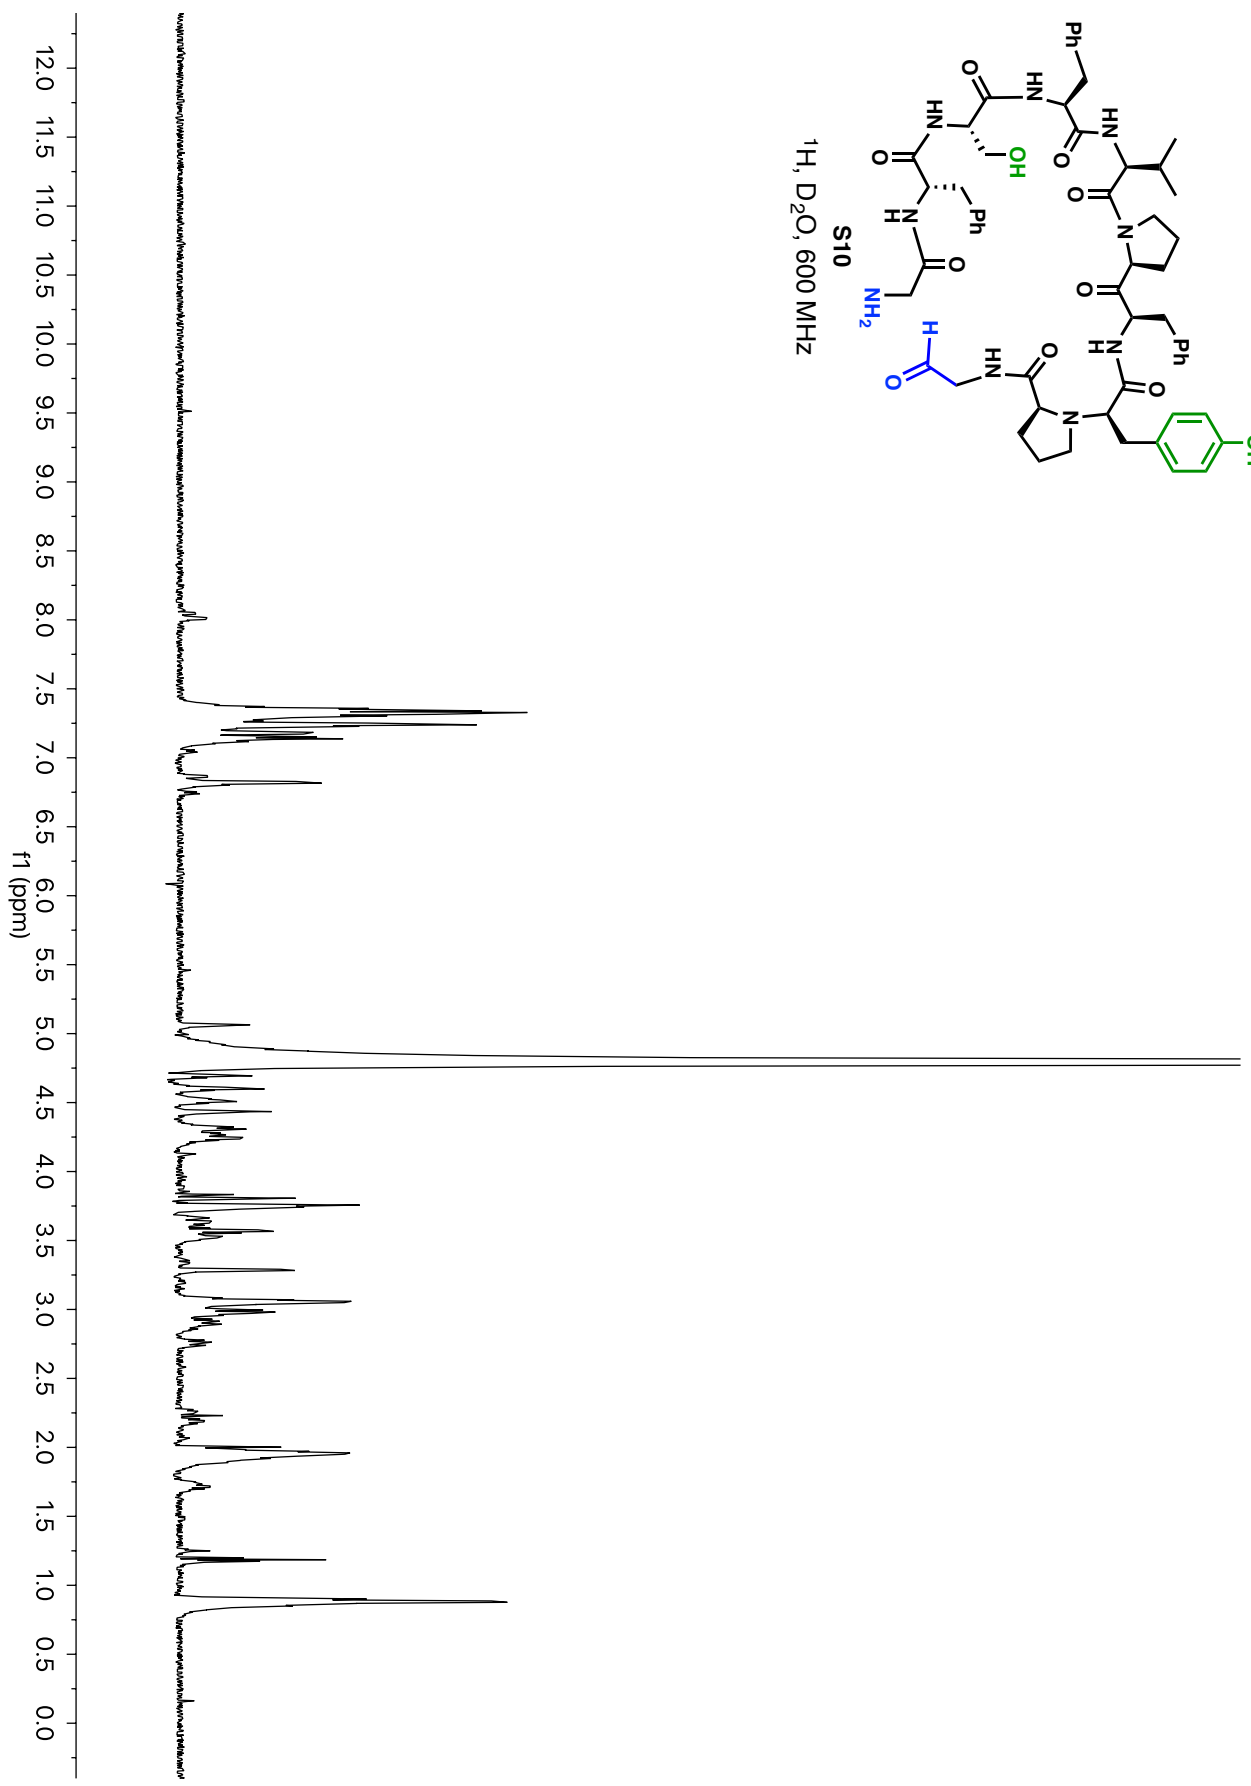

## Peptide S11

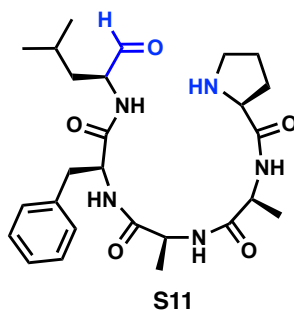

Amino aldehyde **S11** was prepared on a 37  $\mu\text{mol}$  scale according to general procedure 2a. Fmoc-Leu-CHO was loaded onto Rink TG resin and the peptide elongated using standard Fmoc-SPPS. Following cleavage from the resin and ether precipitation, the crude peptide was purified by preparative reverse-phase HPLC (15% B for 5 min, then 15% B to 55% B over 25 min) to afford peptide **S11** (13.0 mg, 70% yield based on the original resin loading) as a white solid following lyophilization.

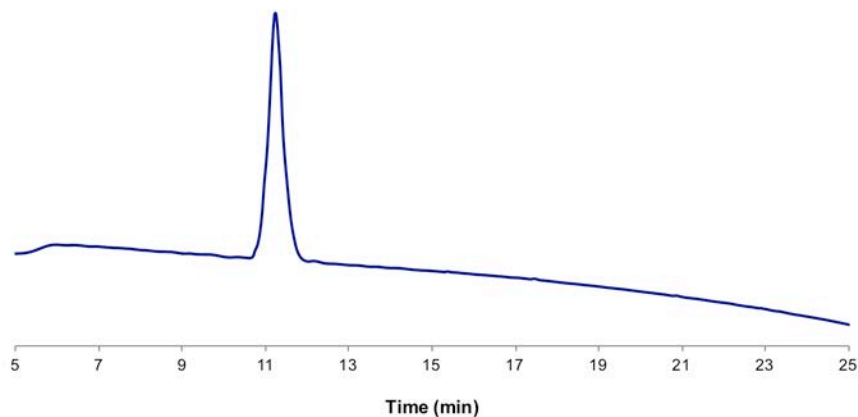

Purified peptide **S11** ( $R_t = 11.2$  min, 5 to 100% B over 25 min,  $\lambda = 210$  nm).

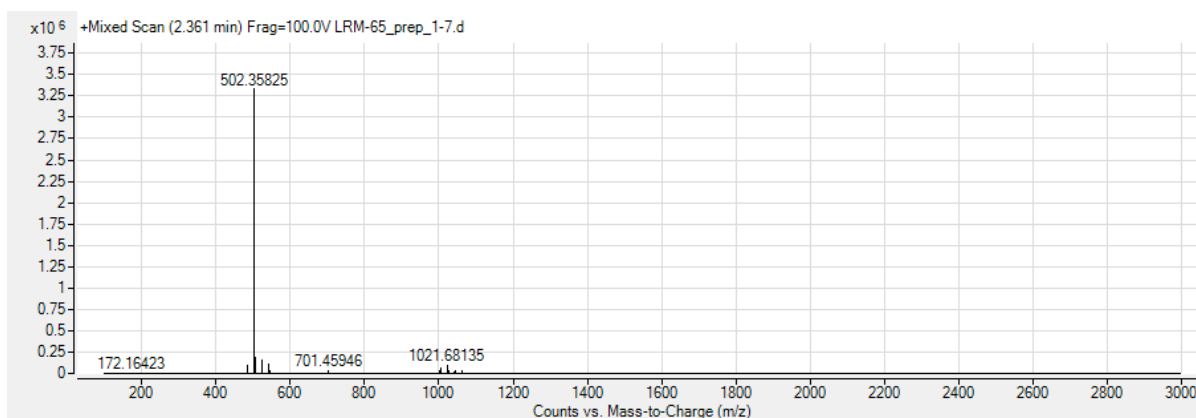

**LRMS (ESI-TOF):** calc'd for  $\text{C}_{26}\text{H}_{40}\text{N}_5\text{O}_5$   $[\text{M}+\text{H}]^+$  502.30; found 502.36.

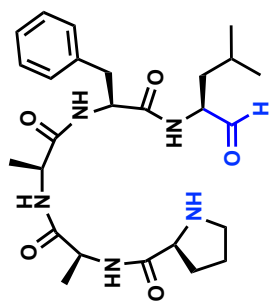

S11  
<sup>1</sup>H, DMSO-d<sub>6</sub>, 500 MHz

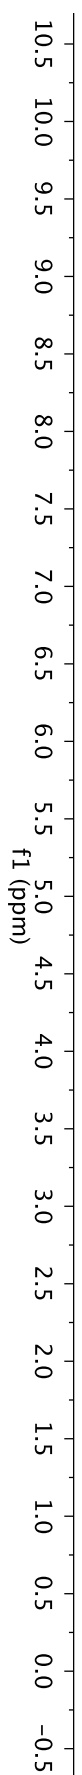

## Peptide S12

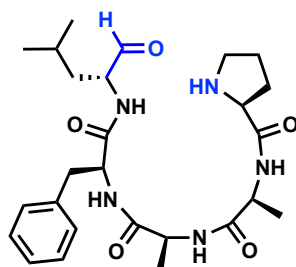

**S12**

Amino aldehyde **S12** was prepared on a 47.5  $\mu\text{mol}$  scale according to general procedure 2a. Fmoc-D-Leu-CHO was loaded onto Rink TG resin and the peptide elongated using standard Fmoc-SPPS. Following cleavage from the resin and ether precipitation, the crude peptide was purified by preparative reverse-phase HPLC (20% B for 5 min, then 20% B to 55% B over 30 min) to afford peptide **S12** (11.5 mg, 48% yield based on the original resin loading) as a white solid following lyophilization.

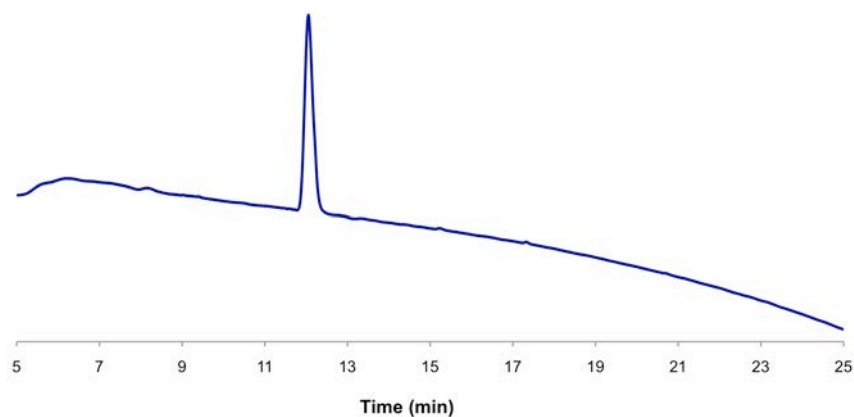

Purified peptide **S12** ( $R_t = 12.1$  min, 5 to 100% B over 25 min,  $\lambda = 210$  nm).

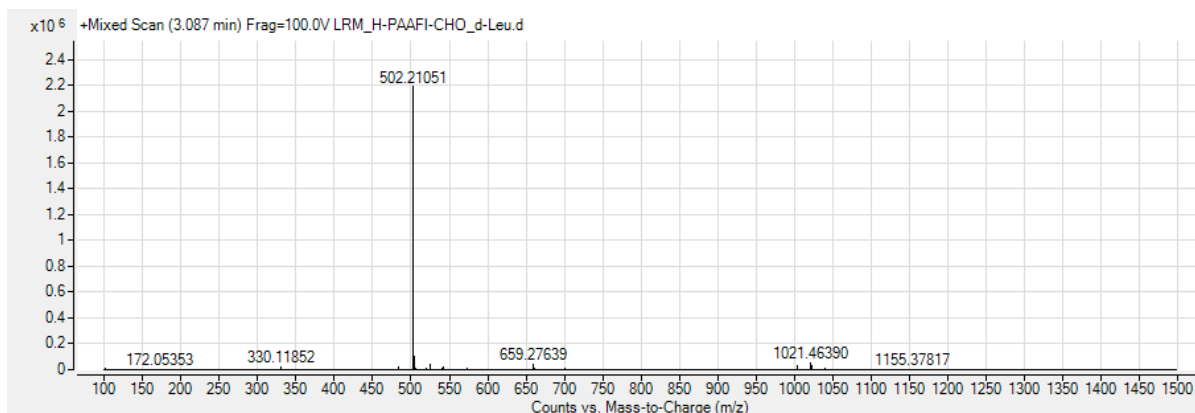

**LRMS (ESI-TOF):** calc'd for  $\text{C}_{26}\text{H}_{40}\text{N}_5\text{O}_5$   $[\text{M}+\text{H}]^+$  502.30; found 502.21.

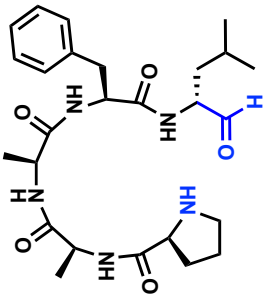

S12

$^1\text{H}$ , DMSO- $d_6$ , 600 MHz

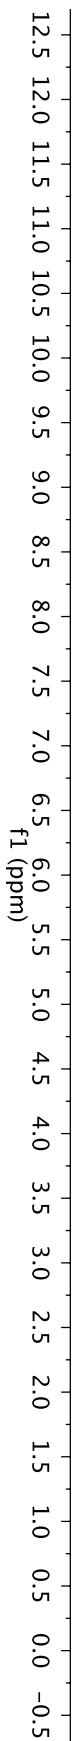

## HPLC overlay of peptides S11 and S12

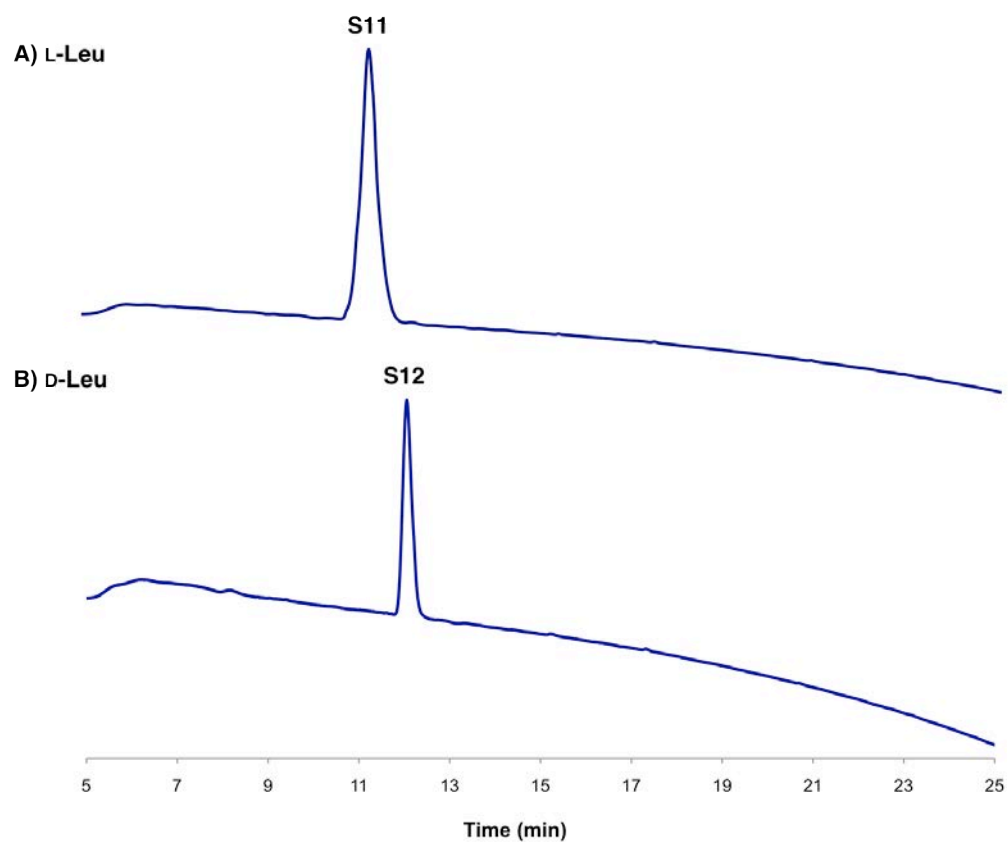

**A)** Purified amino aldehyde **S11**, H-PAAFL-CHO ( $R_t = 11.2$  min, 5 to 100% B over 25 min,  $\lambda = 210$  nm). **B)** Purified amino aldehyde **S12**, H-PAAFL-CHO ( $R_t = 12.1$  min, 5 to 100% B over 25 min,  $\lambda = 210$  nm).

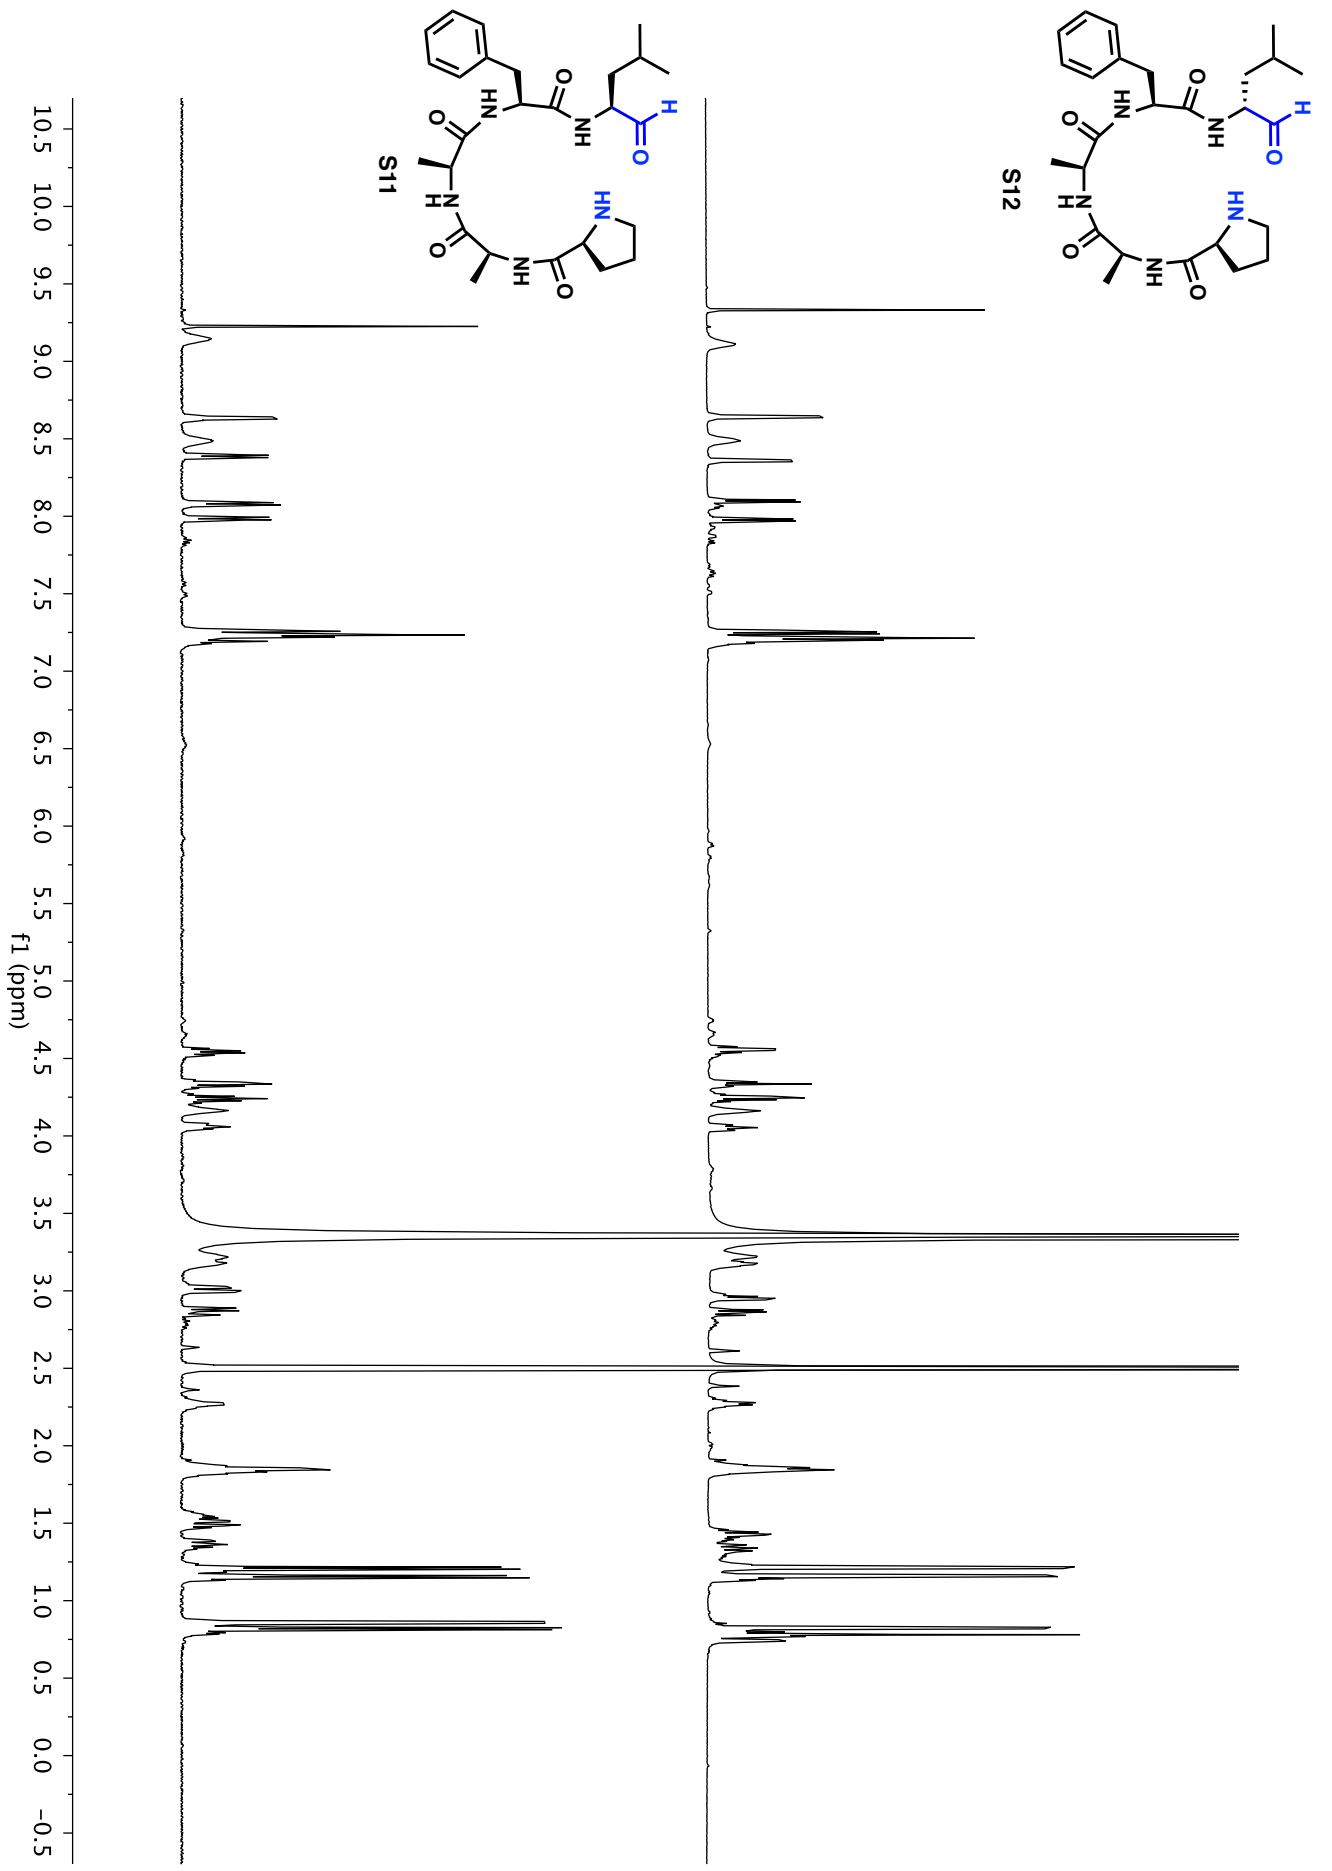

## Peptide S13

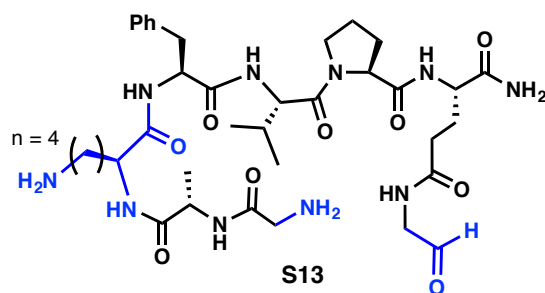

Amino aldehyde **S13** was prepared on a 50  $\mu\text{mol}$  scale on Rink amide resin using standard Fmoc-SPPS. The aldehyde was incorporated according to general procedure 1. Following cleavage from the resin and ether precipitation, the crude peptide was purified by preparative reverse-phase HPLC (0% B for 5 min, then 0% B to 70% B over 30 min) to afford peptide **S13** (16.5 mg, 42% yield based on the original resin loading) as a white solid following lyophilization.

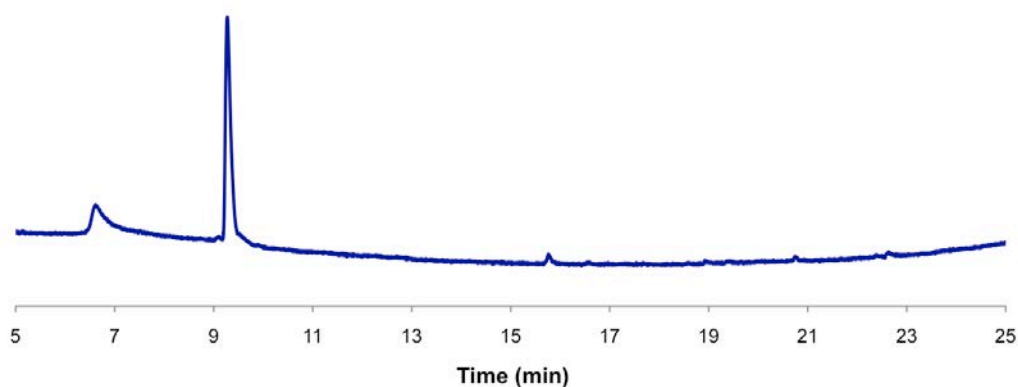

Purified peptide **S13** ( $R_t = 9.3$  min, 0 to 100% B over 25 min,  $\lambda = 254$  nm).

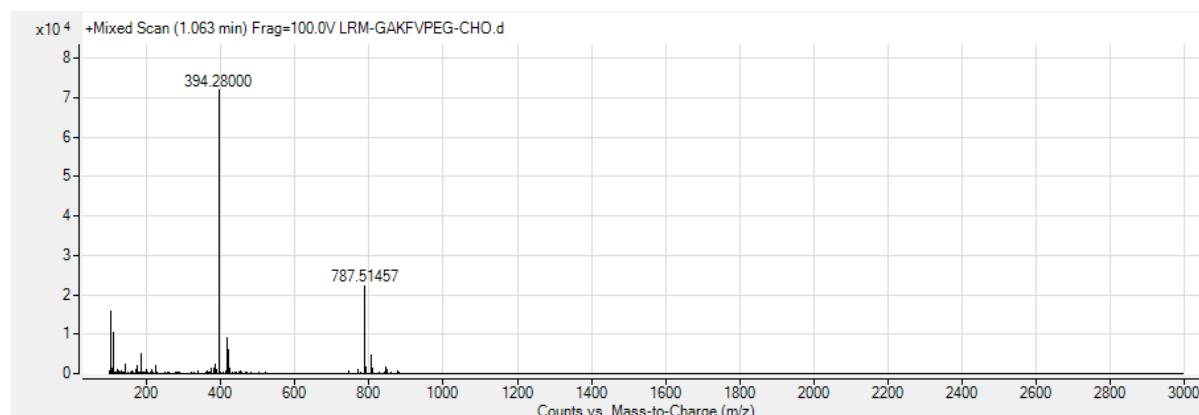



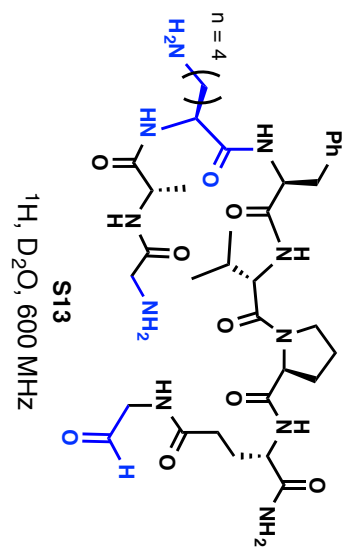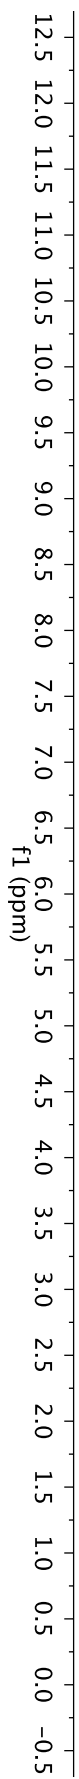

## Peptide S14

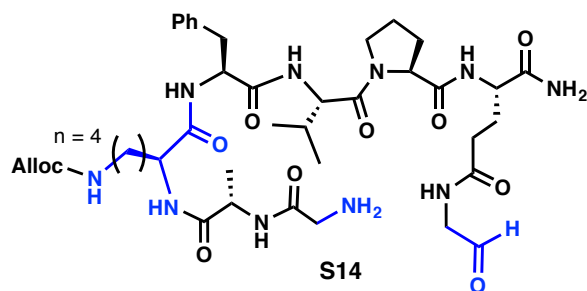

Amino aldehyde **S14** was prepared on a 50  $\mu\text{mol}$  scale on Rink amide resin using standard Fmoc-SPPS. The aldehyde was incorporated according to general procedure 1. Following cleavage from the resin and ether precipitation, the crude peptide was purified by preparative reverse-phase HPLC (0% B for 5 min, then 0% B to 70% B over 30 min) to afford peptide **S14** (16.5 mg, 38% yield based on the original resin loading) as a white solid following lyophilization.

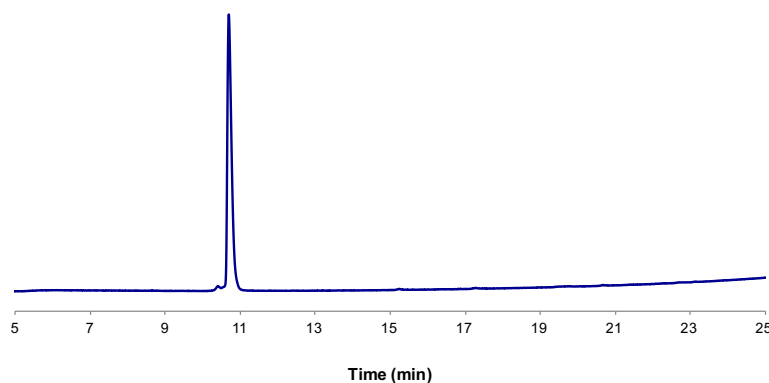

Purified peptide **S14** ( $R_t = 10.7$  min, 5 to 100% B over 25 min,  $\lambda = 230$  nm).

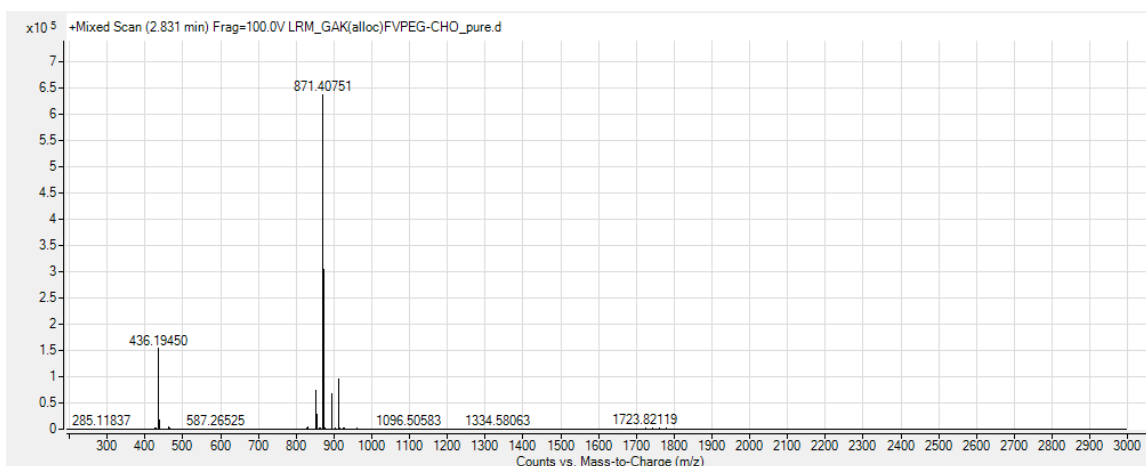

**LRMS (ESI-TOF):** calc'd for  $\text{C}_{41}\text{H}_{63}\text{N}_{10}\text{O}_{11}$   $[\text{M}+\text{H}]^+$  871.47; found 871.41.

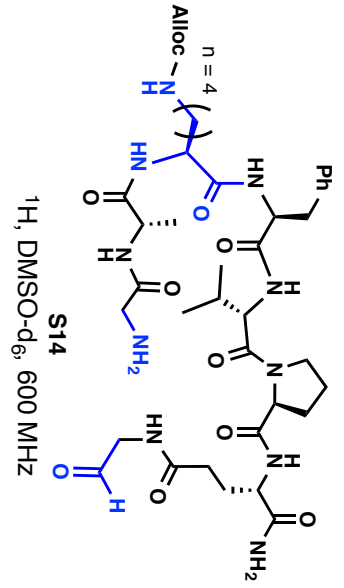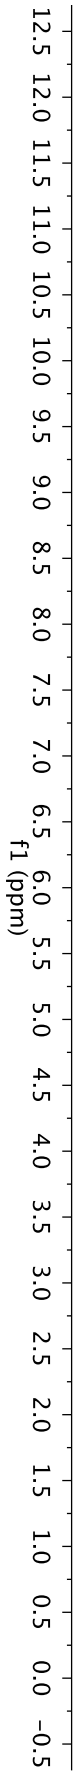

## Peptide S15

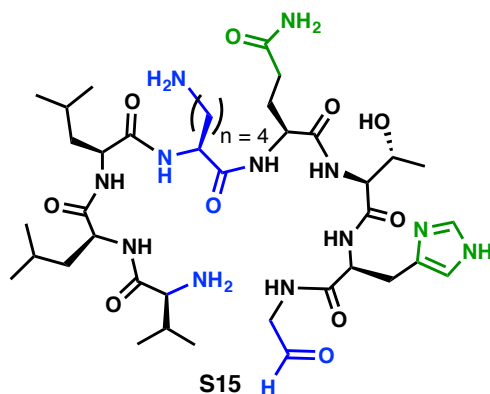

Amino aldehyde **S15** was prepared on a 70  $\mu\text{mol}$  scale according to general procedure 2b. Fmoc-Gly-CHO was loaded onto Rink TG resin and the peptide elongated using standard Fmoc-SPPS. Following cleavage from the resin and ether precipitation, the crude peptide was purified by preparative reverse-phase HPLC (10% B for 5 min, then 10% B to 60% B over 30 min) to afford peptide **S15** (31.2 mg, 51% yield based on the original resin loading) as a white solid following lyophilization.

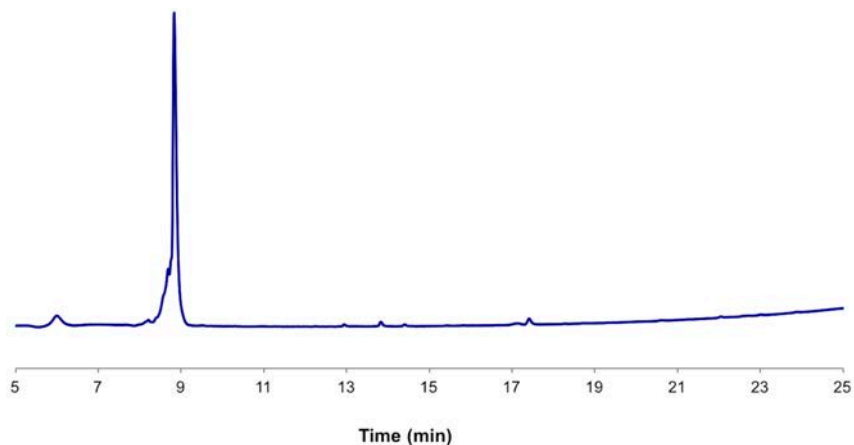

Purified peptide **S15** ( $R_t = 8.8$  min, 5 to 100% B over 25 min,  $\lambda = 210$  nm).

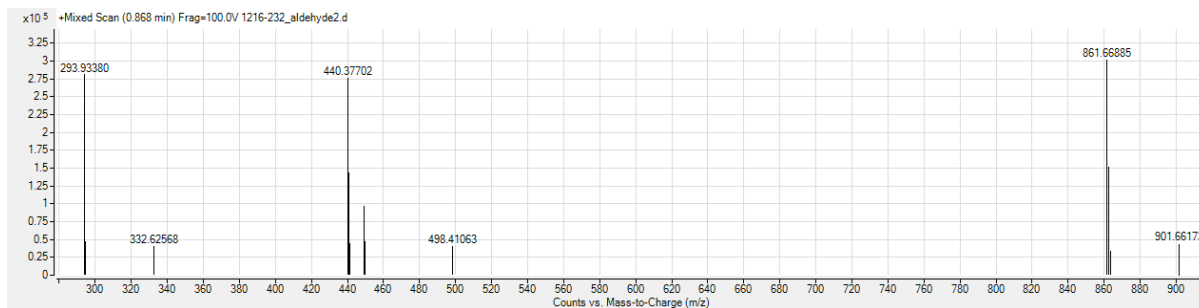

**LRMS (ESI-TOF):** calc'd for  $\text{C}_{26}\text{H}_{40}\text{N}_5\text{O}_5$   $[\text{M}+\text{H}]^+$  861.53; found 861.67.

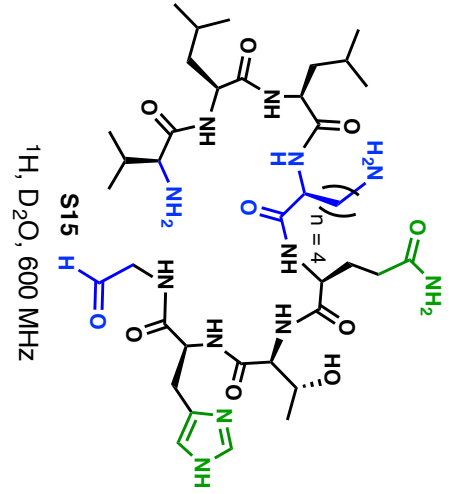

$^1H$ ,  $D_2O$ , 600 MHz

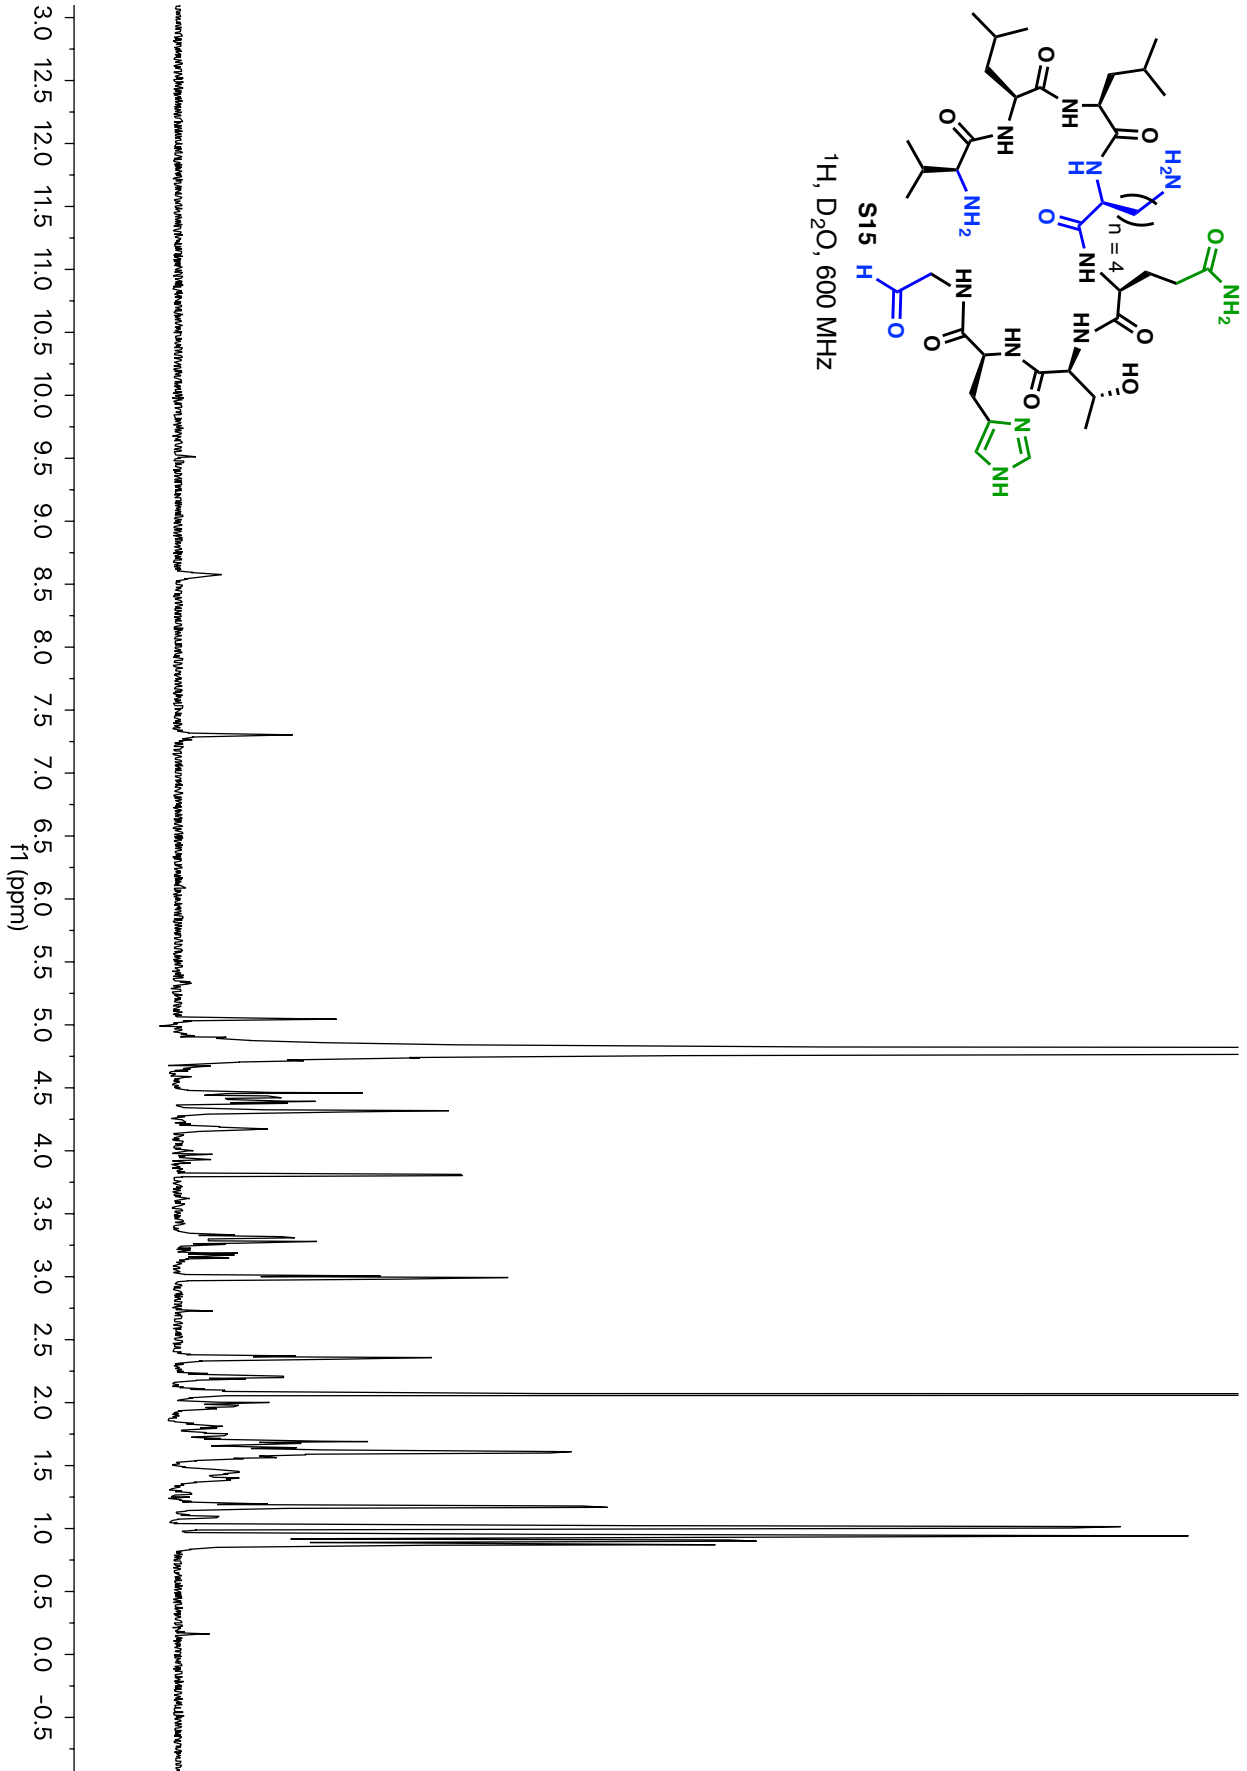

## Peptide S16

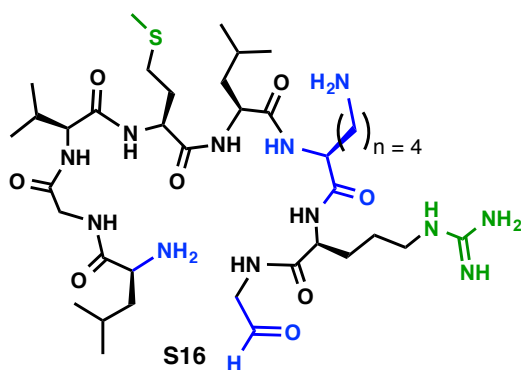

Amino aldehyde **S16** was prepared on a 35  $\mu\text{mol}$  scale according to general procedure 2b. Fmoc-Gly-CHO was loaded onto Rink TG resin and the peptide elongated using standard Fmoc-SPPS. Following cleavage from the resin and ether precipitation, the crude peptide was purified by preparative reverse-phase HPLC (5% B for 5 min, then 5% B to 45% B over 35 min) to afford peptide **S16** (3.1 mg) and an oxidized Met variant (3.5 mg) in 22% combined yield based on the original resin loading and as white solids following lyophilization.

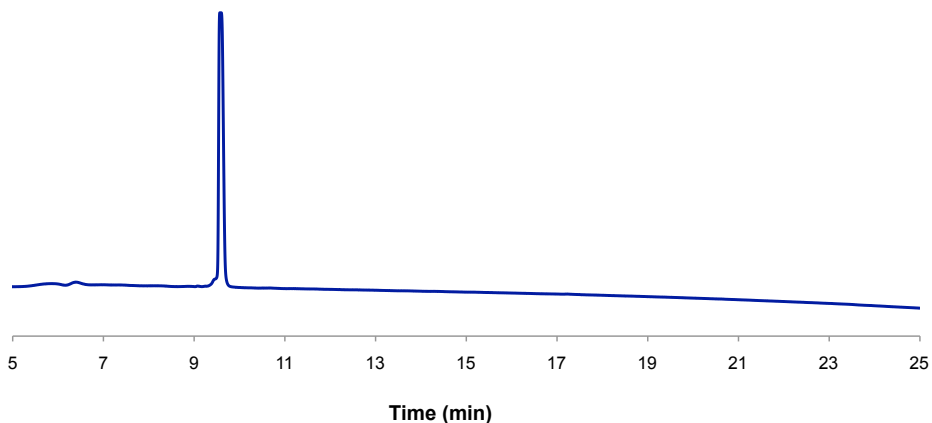

Purified peptide **S16** (Rt = 9.6 min, 5 to 100% B over 25 min,  $\lambda = 210$  nm).

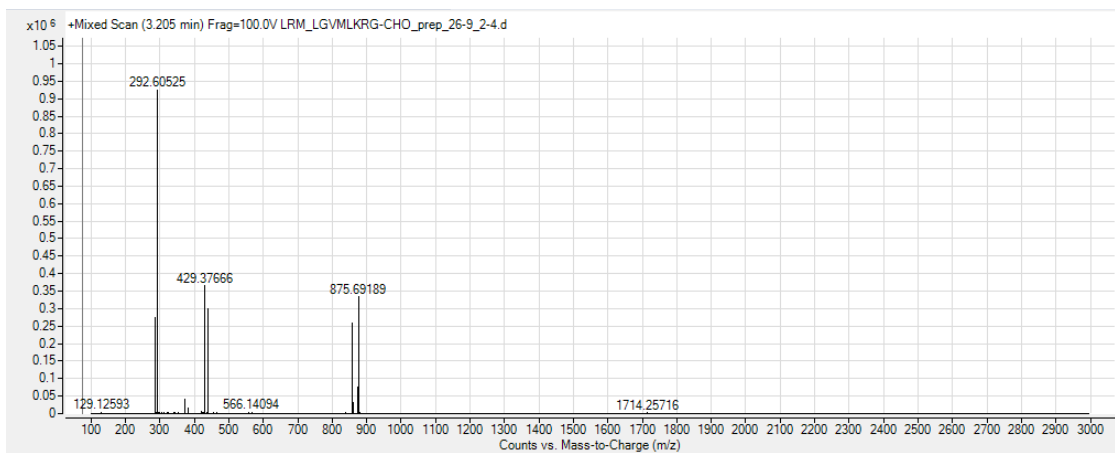

**LRMS (ESI-TOF):** calc'd for  $C_{38}H_{73}N_{12}O_8S$   $[M+H]^+$  857.54; found 875.69 (aldehyde hydrate),  $[M+2H]^{2+}$  429.27; found 429.38,  $[M+3H]^{3+}$  286.52; found 292.60 (aldehyde hydrate).

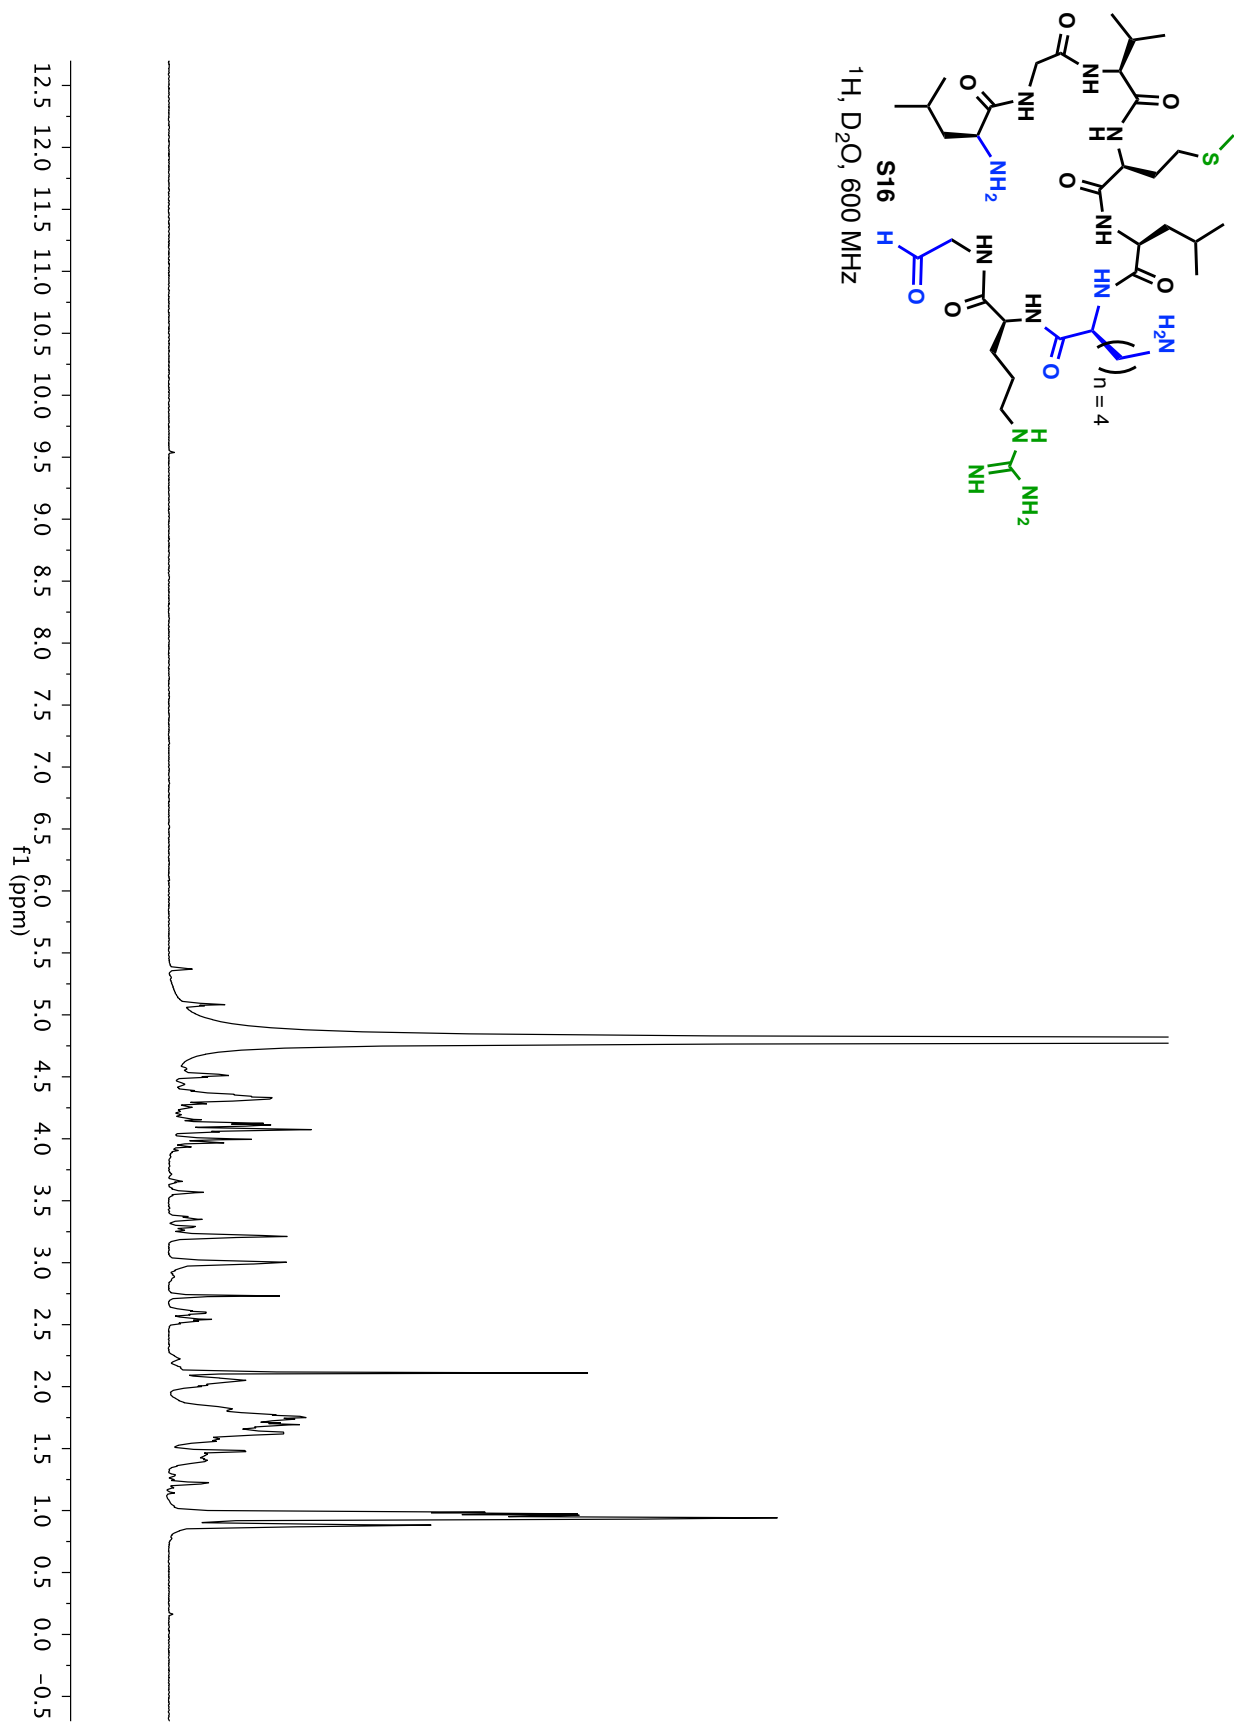



## Peptide S17

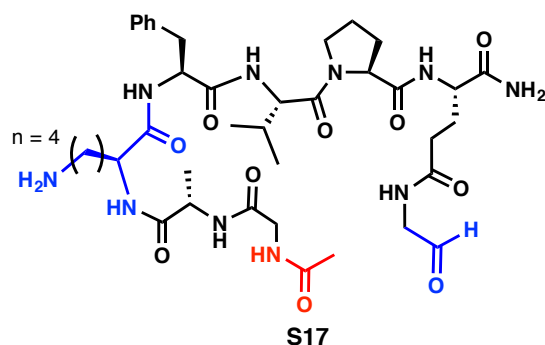

Amino aldehyde **S17** was prepared on a 40  $\mu\text{mol}$  scale on Rink amide resin using standard Fmoc-SPPS. The aldehyde was incorporated according to general procedure 1. Following cleavage from the resin and ether precipitation, the crude peptide was purified by preparative reverse-phase HPLC (5% B for 5 min, then 5% B to 40% B over 25 min) to afford peptide **S17** (1.3 mg, 4% yield based on the original resin loading) as a white solid following lyophilization.

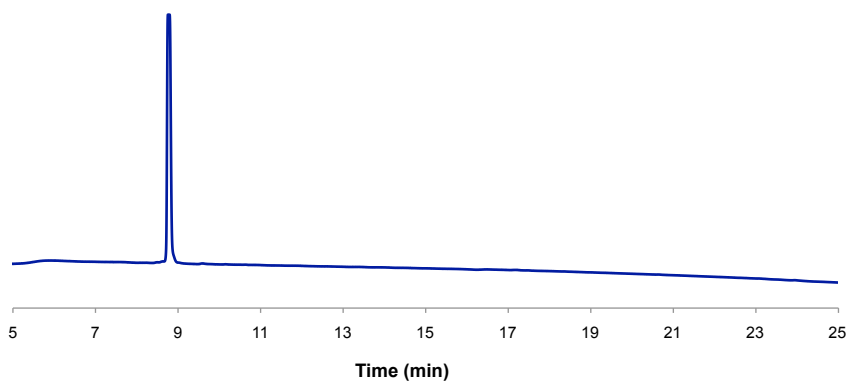

Purified peptide **S17** ( $R_t = 8.8$  min, 5 to 100% B over 25 min,  $\lambda = 210$  nm).

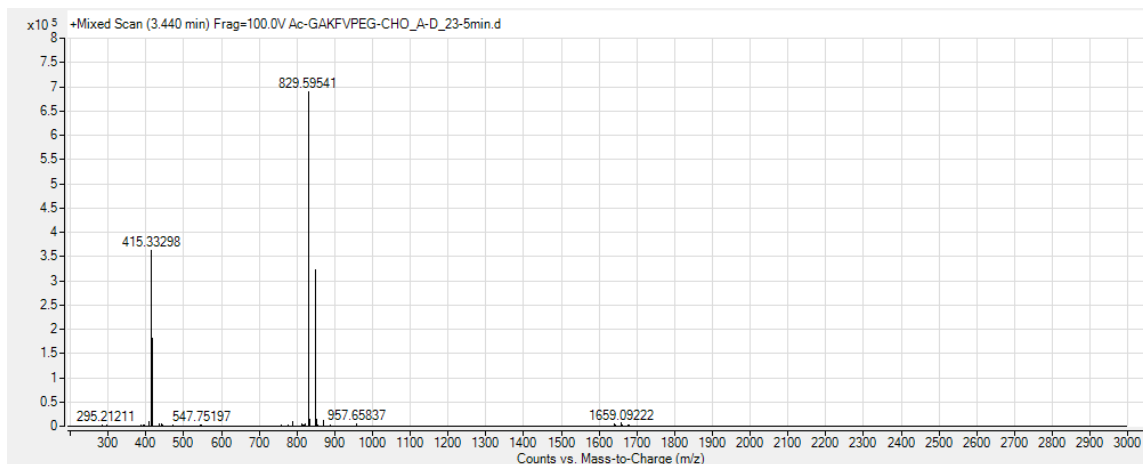

LRMS (ESI-TOF): calc'd for  $\text{C}_{39}\text{H}_{61}\text{N}_{10}\text{O}_{10}$   $[\text{M}+\text{H}]^+$  829.46; found 829.60.

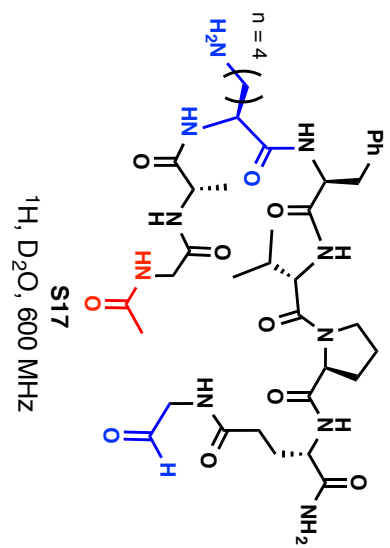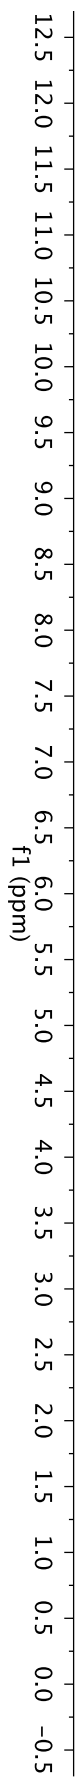

## Peptide S19

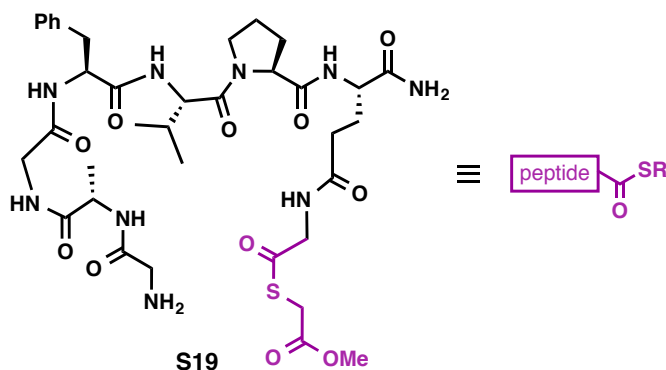

Peptide **S19** was prepared on Rink amide resin using Fmoc-SPPS according to the following reaction scheme:

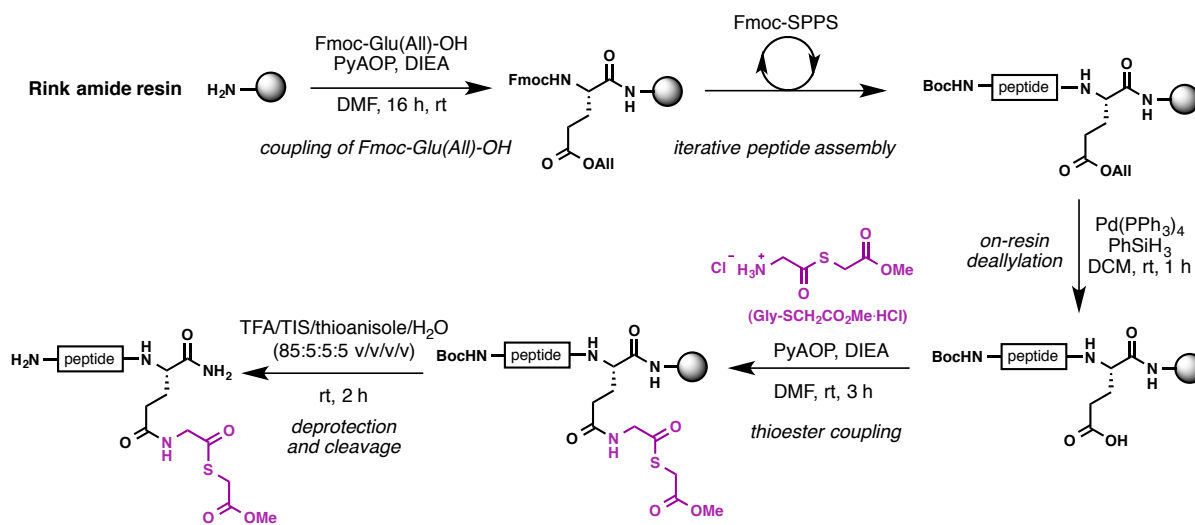

### Preparation of Gly-SCH<sub>2</sub>CO<sub>2</sub>Me•HCl:

Gly-SCH<sub>2</sub>CO<sub>2</sub>Me•HCl was prepared from Boc-Gly-OH according to a published protocol,<sup>8</sup> by employing methyl thioglycolate in the thioesterification step. Briefly, Boc-Gly-OH (1.00 g, 5.71 mmol) was dissolved in THF (20 mL) and treated with methyl thioglycolate (1.0 equiv.). The reaction was cooled to 0 °C and then treated with HOBt (1.2 equiv.) and DIC (1.2 equiv.). The reaction was warmed to rt and stirred for 20 h. The crude reaction mixture was filtered through a plug of Celite, eluted with DCM, and concentrated *in vacuo*. The residue was resuspended in EtOAc (40 mL) and washed with 5% NaHCO<sub>3</sub> (30 mL), 0.1 M HCl (30 mL), and brine (30 mL). The organic layer was dried (MgSO<sub>4</sub>), filtered and concentrated, and subsequently purified by flash column chromatography (1:2 EtOAc/Hexanes) to afford the Boc-protected thioester

(1.301 g, 86% yield). A portion of the thioester (0.951 g, 3.61 mmol) was dissolved in DCM (2 mL) and treated with 4 M HCl in dioxane (1.5 mL) to remove the Boc group. After stirring at rt for 3 h, a second aliquot of 4 M HCl in dioxane (1 mL) was added and the reaction stirred for an additional 3 h. The reaction mixture was concentrated *in vacuo* and coevaporated twice with EtOAc to afford the target thioester as the HCl salt in quantitative yield.

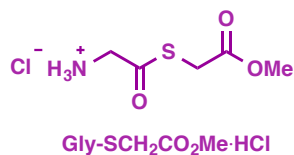

**Physical State:** white solid

**<sup>1</sup>H NMR** (600 MHz, D<sub>2</sub>O) δ 4.28 (s, 2H), 3.97 (s, 2H), 3.80 (s, 3H).

**<sup>13</sup>C NMR** (151 MHz, D<sub>2</sub>O) δ 193.8, 171.1, 53.5, 46.8, 30.9.

**HRMS (ESI-TOF):** calc'd for C<sub>5</sub>H<sub>10</sub>NO<sub>3</sub>S [M+H]<sup>+</sup> 164.0376; found 164.0376.

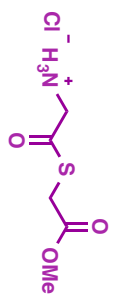

Gly-SCH<sub>2</sub>CO<sub>2</sub>Me·HCl

<sup>1</sup>H, D<sub>2</sub>O, 600 MHz

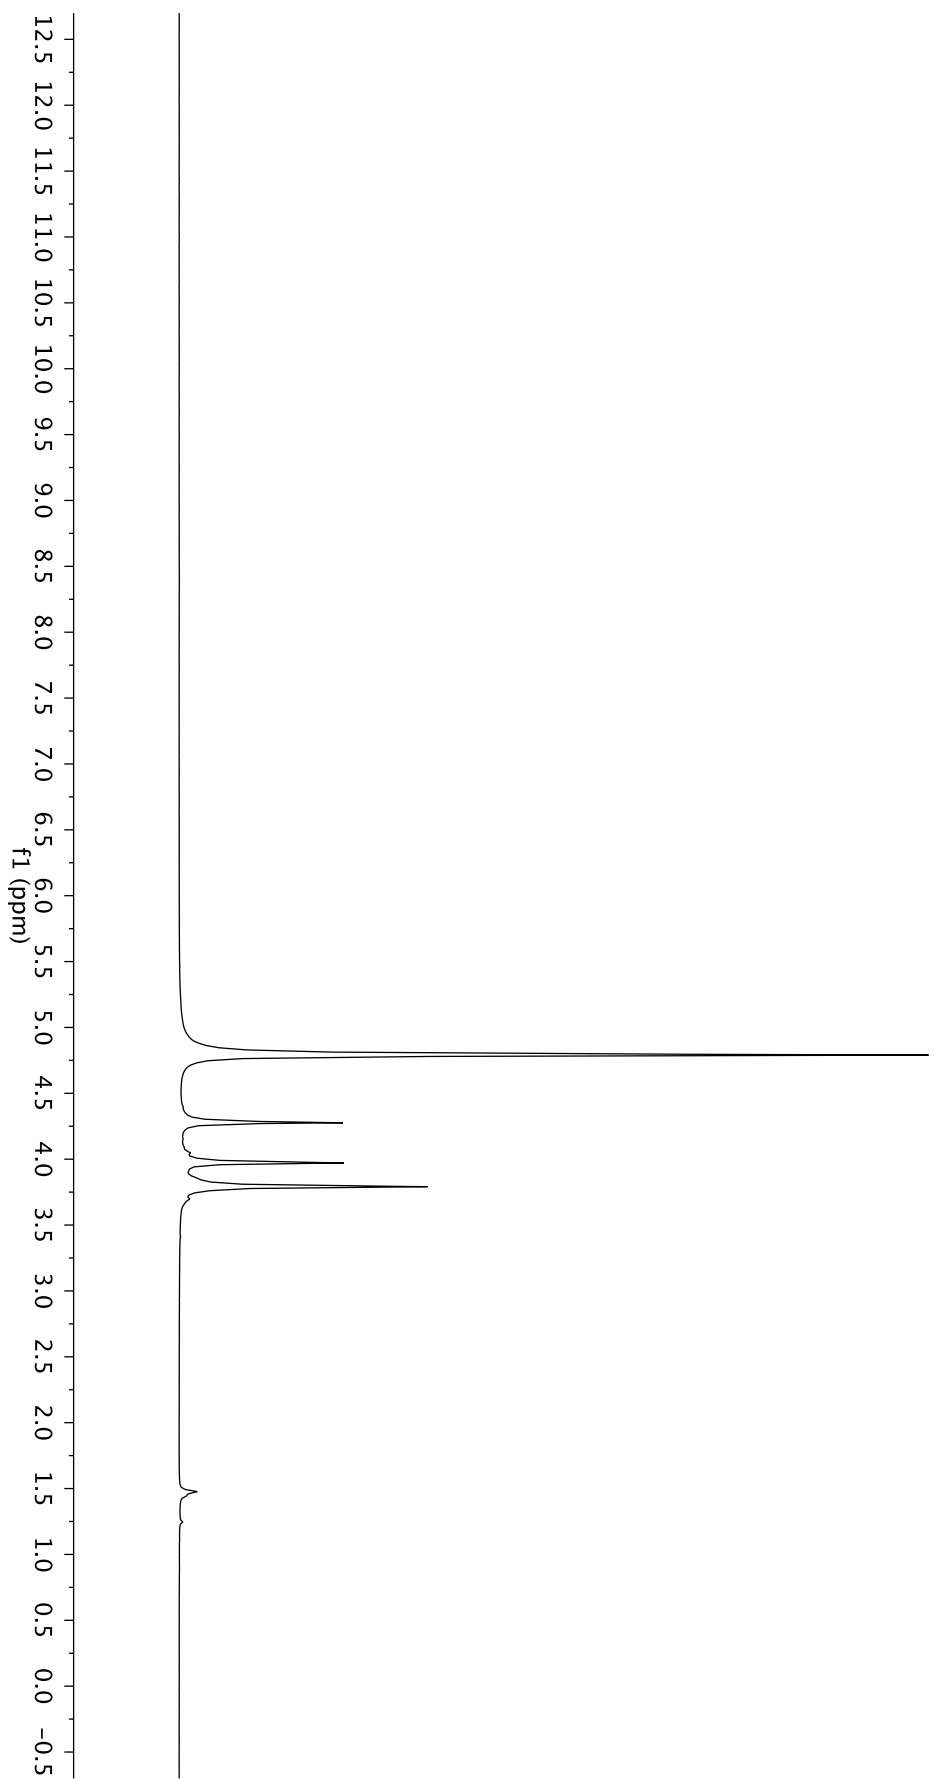

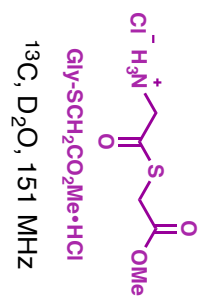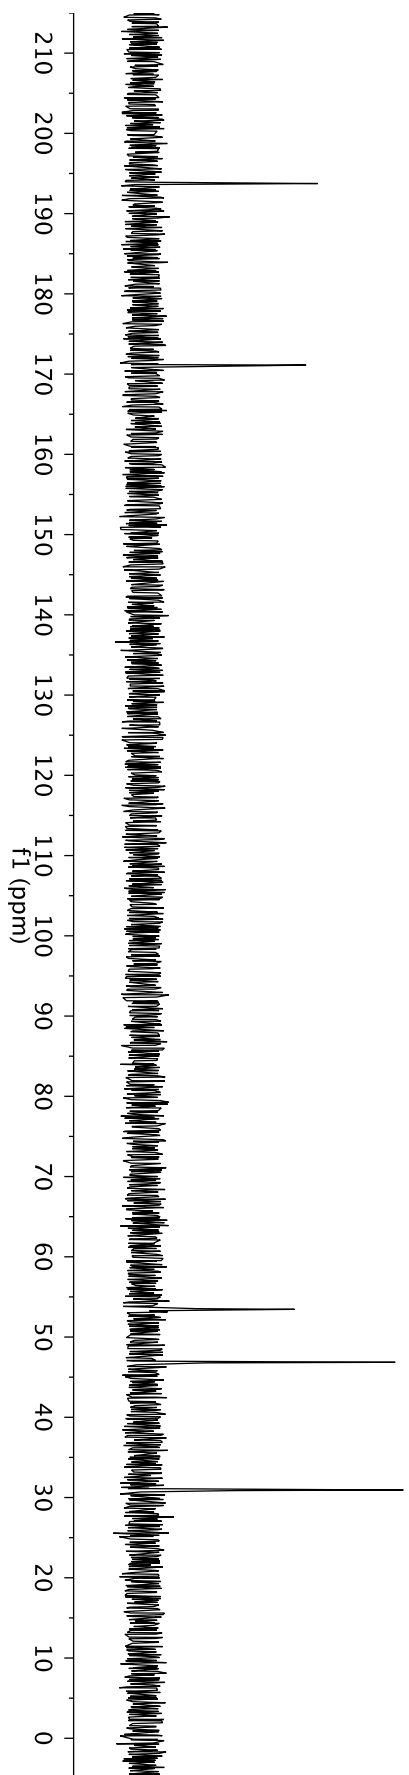

*Preparation of peptide thioester S19:*

General iterative Fmoc-SPPS was used to prepare the precursor peptide, Boc-GAGFVPE(All)-Rink. The resin-bound peptide was deallylated using Pd(PPh<sub>3</sub>)<sub>4</sub> and PhSiH<sub>3</sub> as described in the general solid-phase protocols. The preformed amino acid thioester, Gly-SCH<sub>2</sub>CO<sub>2</sub>Me•HCl, was next coupled to the resin (20 μmol scale). The thioester (10 equiv.) was dissolved in DMF (0.55 mL) and treated with DIEA (20 equiv.). PyAOP (10 equiv.) was added as a solid to the reaction vessel, followed by the addition of the solution of thioester. The resin was shaken at rt for 2 h then washed with DMF, and DCM. The peptide was cleaved from the resin upon treatment with a mixture of TFA/TIS/thioanisole/water (85:5:5:5 v/v/v/v) at rt for 2 h. The cleavage solution was concentrated under a stream of nitrogen and the crude peptide precipitated with cold ether. Purification by preparative reverse-phase HPLC (20% for 5 min, 20% to 70% over 30 min) afforded thioester **S19** (6.7 mg, 41% yield) as a white solid following lyophilization.

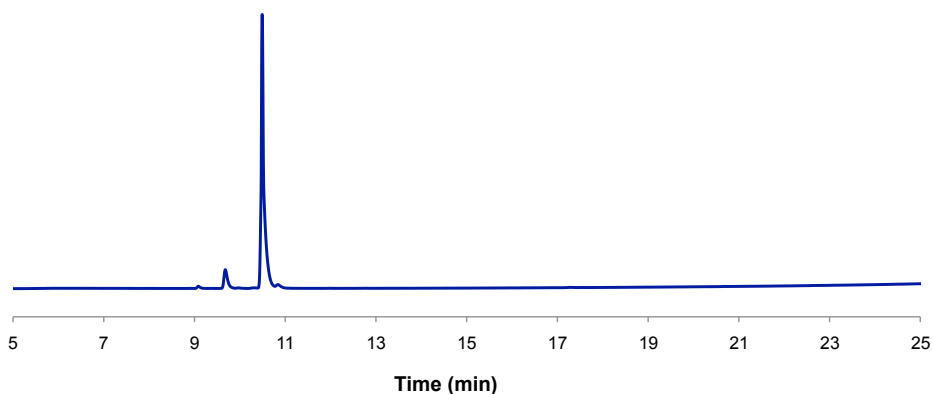

Purified peptide **S19** (Rt = 10.5 min, 5 to 100% B over 25 min, λ = 230 nm).

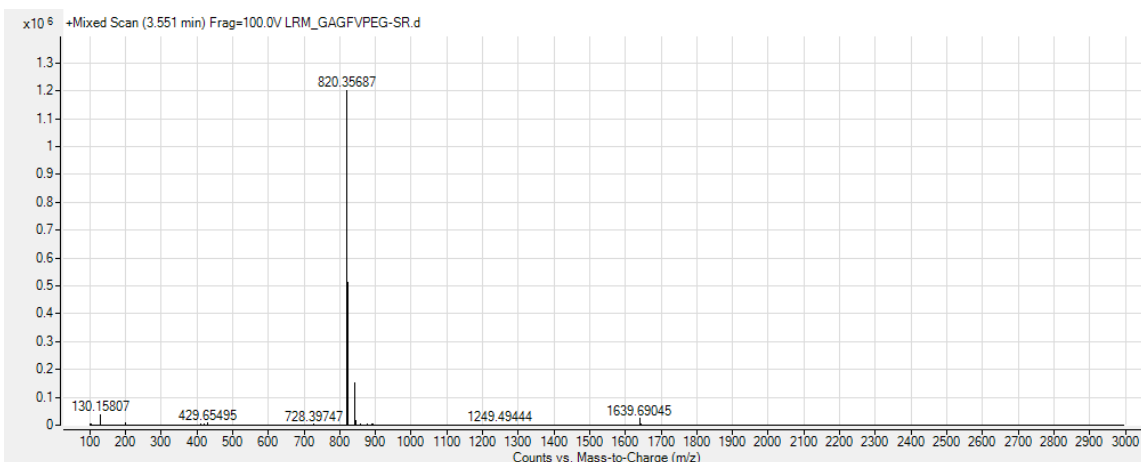

**LRMS (ESI-TOF):** calc'd for C<sub>36</sub>H<sub>54</sub>N<sub>9</sub>O<sub>11</sub>S [M+H]<sup>+</sup> 820.37; found 820.36.

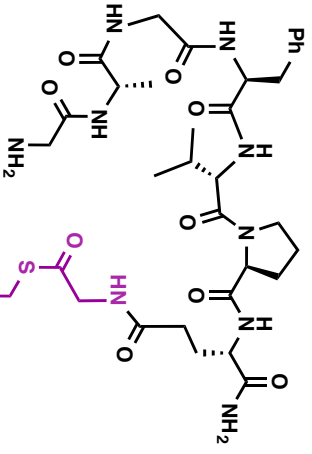

**S19**  
<sup>1</sup>H, D<sub>2</sub>O, 600 MHz

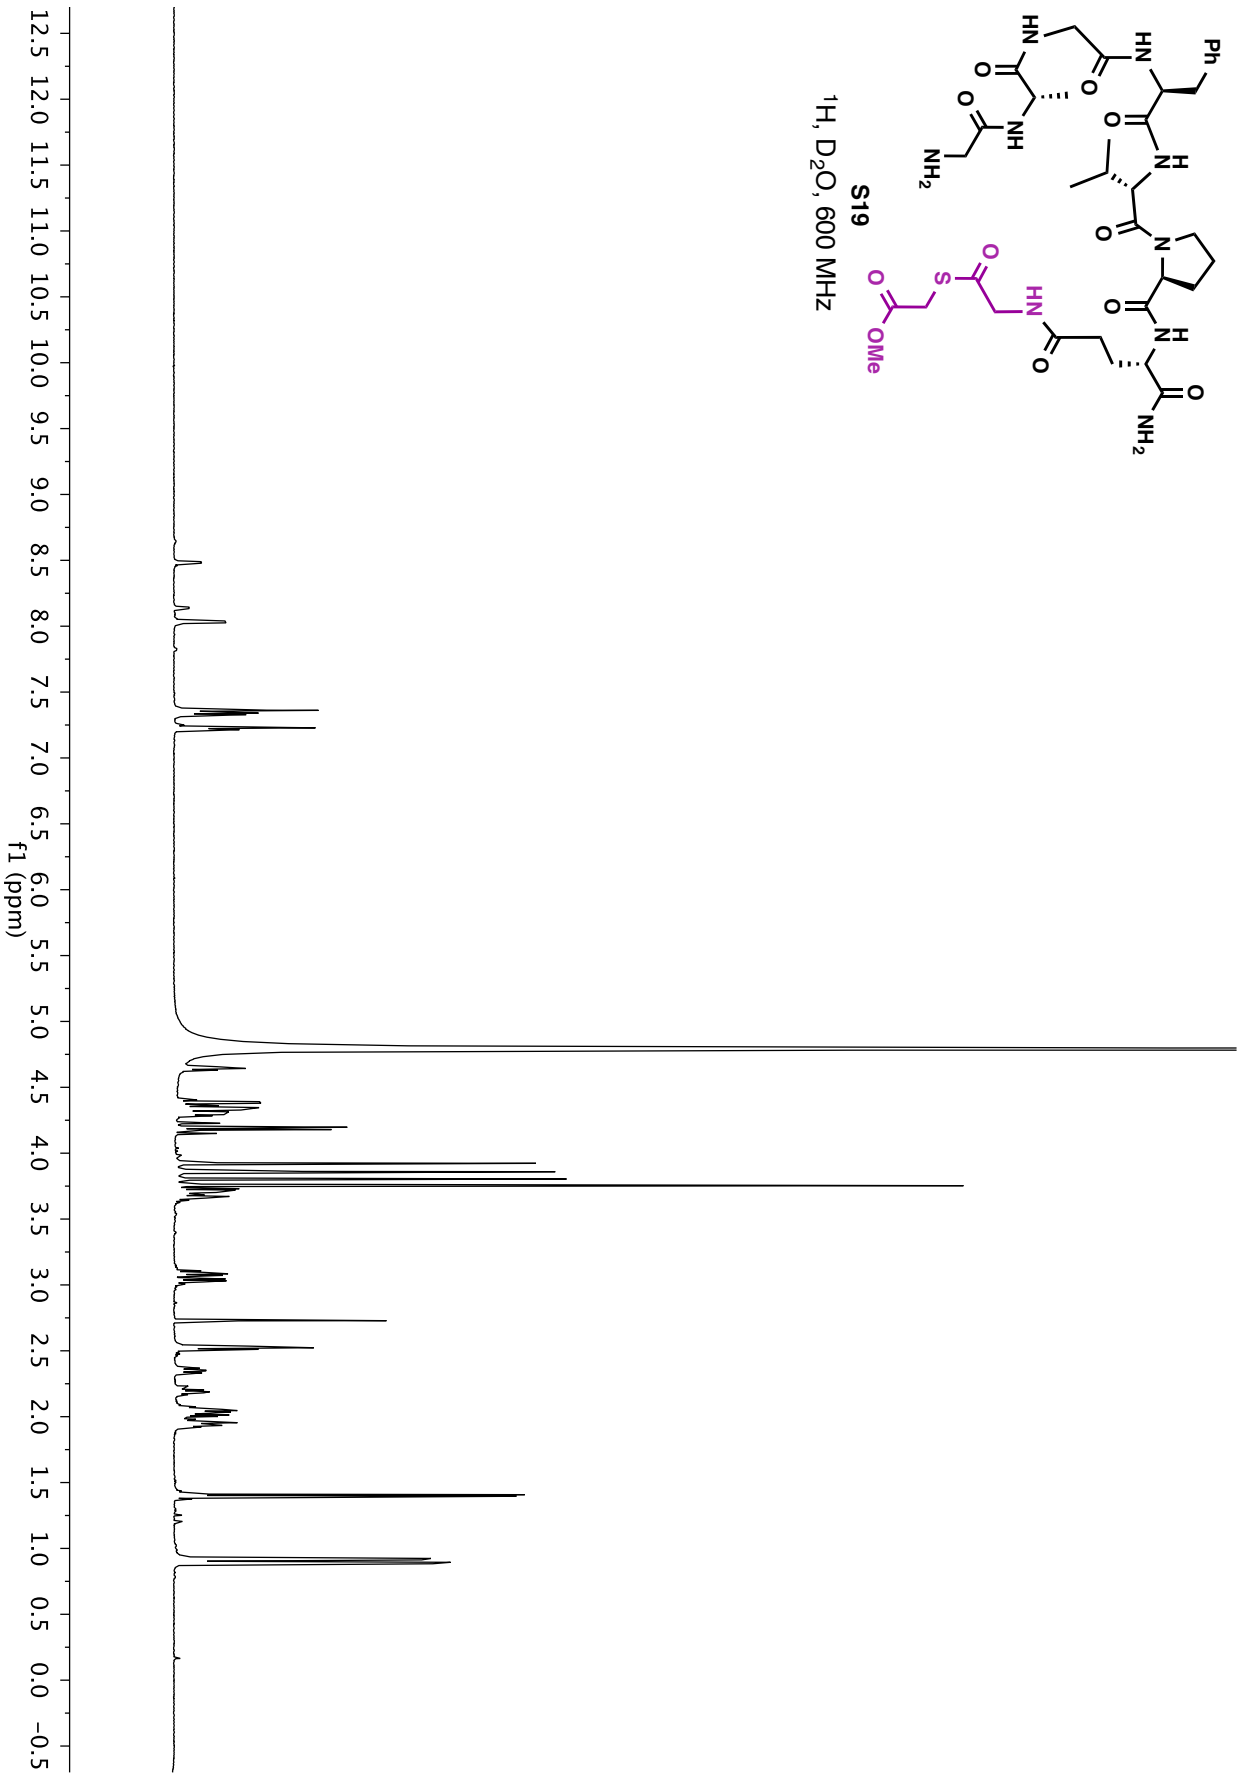



## Peptide S20

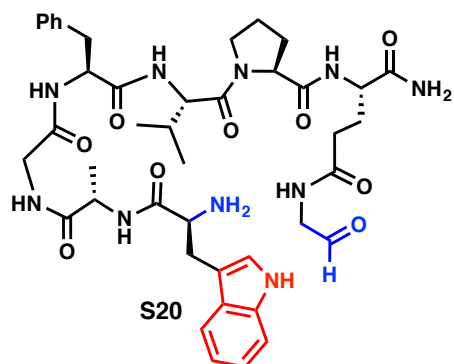

Amino aldehyde **S20** was prepared on a 34  $\mu\text{mol}$  scale on Rink amide resin using standard Fmoc-SPPS. The aldehyde was incorporated according to general procedure 1. Following cleavage from the resin and ether precipitation, the crude peptide was purified by preparative reverse-phase HPLC (20% B for 5 min, then 20% B to 55% B over 25 min) to afford peptide **S20** (6.2 mg, 22% yield based on the original resin loading) as a white solid following lyophilization.

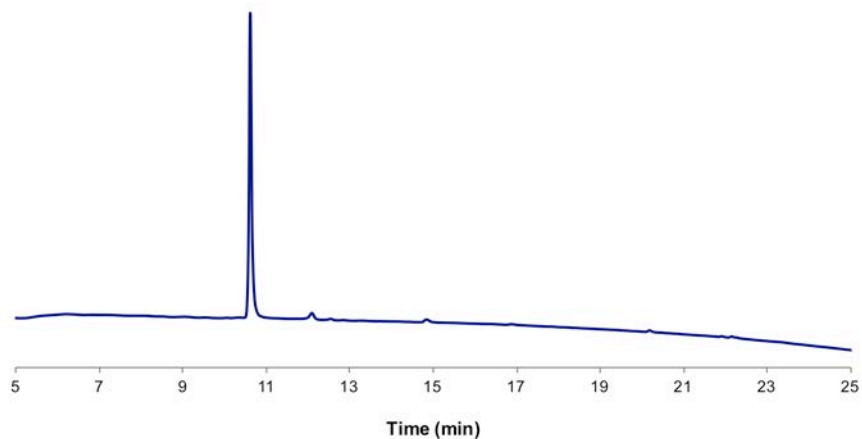

Purified peptide **S20** ( $R_t = 10.6$  min, 5 to 100% B over 25 min,  $\lambda = 210$  nm).

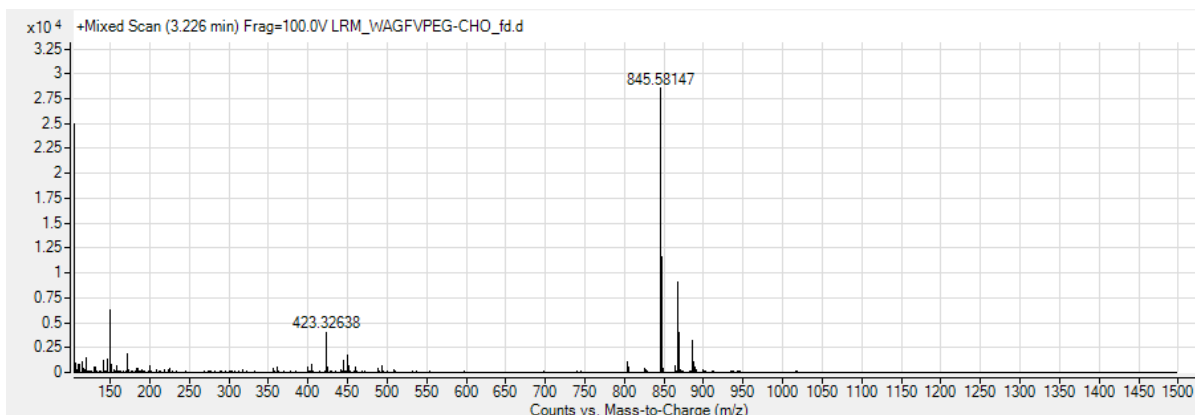

LRMS (ESI-TOF): calc'd for  $\text{C}_{42}\text{H}_{57}\text{N}_{10}\text{O}_9$   $[\text{M}+\text{H}]^+$  845.43; found 845.58.

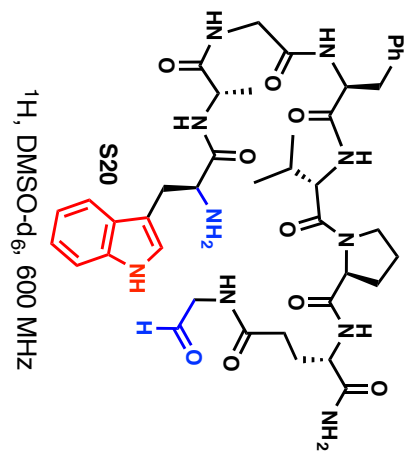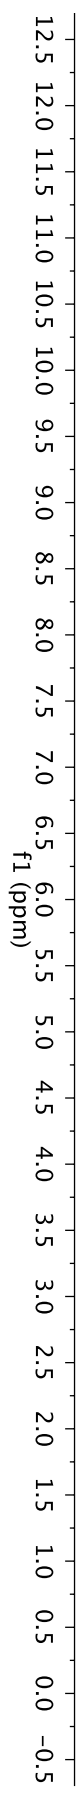

## Peptide S21

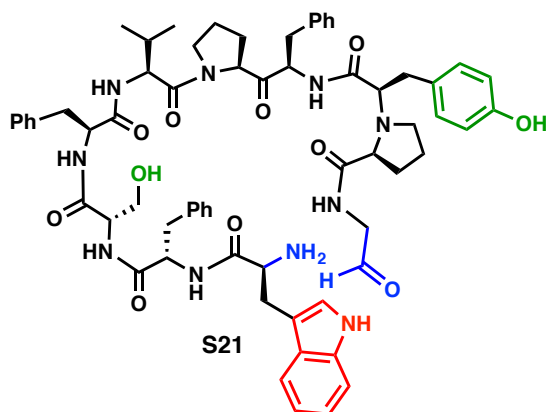

Amino aldehyde **S21** was prepared on a 35  $\mu\text{mol}$  scale according to general procedure 2b. Fmoc-Gly-CHO was loaded onto Rink TG resin and the peptide elongated using standard Fmoc-SPPS. Following cleavage from the resin and ether precipitation, the crude peptide was purified by preparative reverse-phase HPLC (35% B for 5 min, then 35% B to 75% B over 30 min) to afford peptide **S21** (16.3 mg, 38% yield based on the original resin loading) as a white solid following lyophilization.

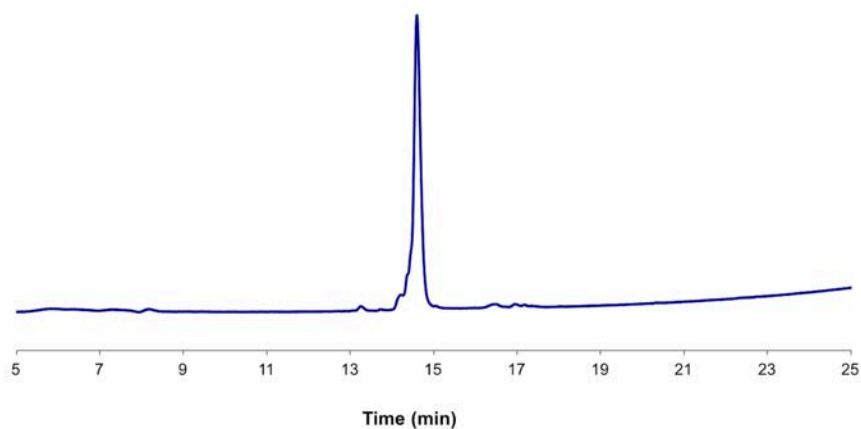

Purified peptide **S21** ( $R_t = 14.6$  min, 5 to 100% B over 25 min,  $\lambda = 210$  nm).

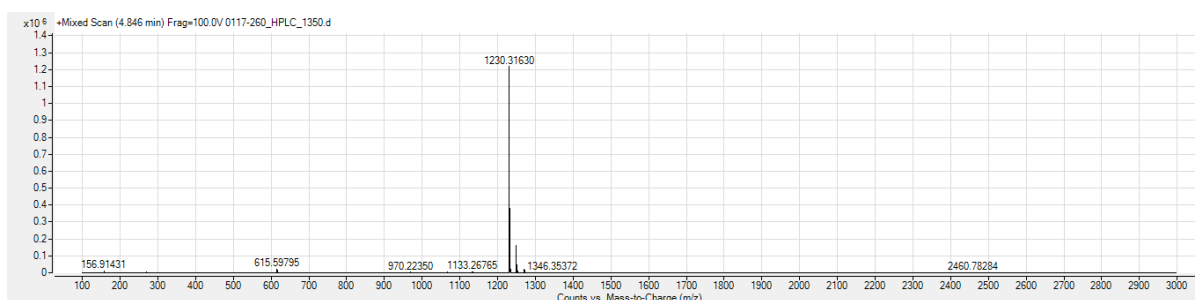

**LRMS (ESI-TOF):** calc'd for  $\text{C}_{26}\text{H}_{40}\text{N}_5\text{O}_5$   $[\text{M}+\text{H}]^+$  1230.60; found 1230.32.

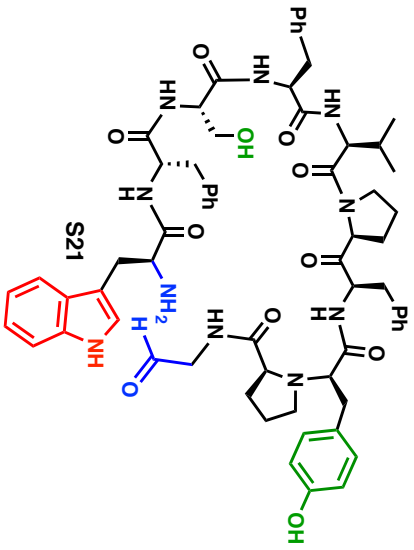

<sup>1</sup>H, DMSO-d<sub>6</sub>/D<sub>2</sub>O (20:1 v/v), 600 MHz

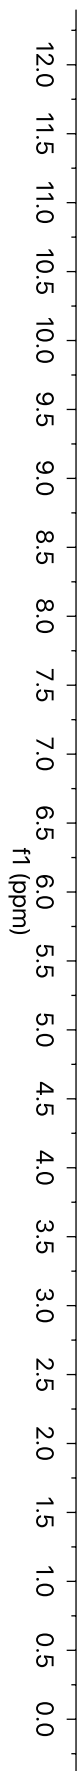

## Peptide S22

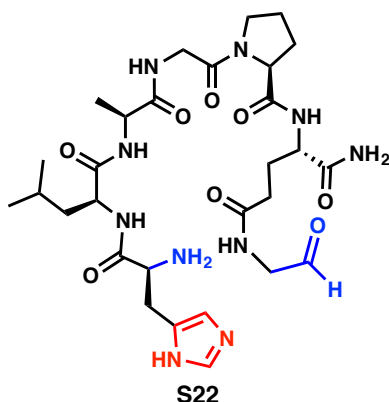

Amino aldehyde **S22** was prepared on a 170  $\mu\text{mol}$  scale on Rink amide resin using standard Fmoc-SPPS. The aldehyde was incorporated according to general procedure 1. Following cleavage from the resin and ether precipitation, the crude peptide was purified by preparative reverse-phase HPLC (5% B for 5 min, then 5% B to 40% B over 30 min) to afford peptide **S22** (31.6 mg, 28% yield based on the original resin loading) as a white solid following lyophilization.

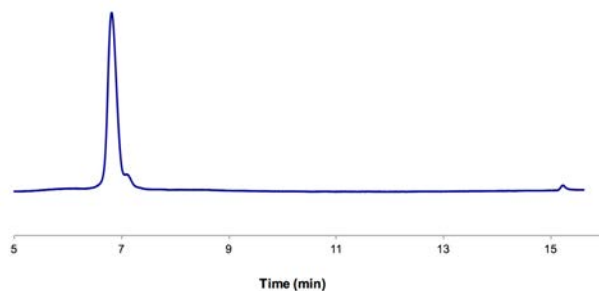

Purified peptide **S22** (Rt = 6.80 min, 5 to 100% B over 25 min,  $\lambda = 210$  nm).

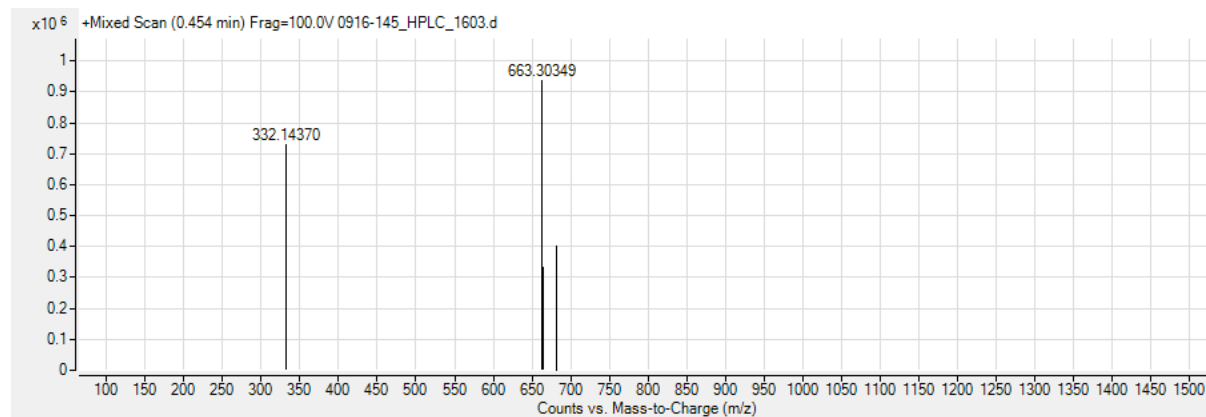

**LRMS (ESI-TOF):** calc'd for  $\text{C}_{26}\text{H}_{41}\text{N}_9\text{O}_7$   $[\text{M}+\text{H}]^+$  663.36; found 663.30,  $[\text{M}+2\text{H}]^{2+}$  332.18; found 332.14.

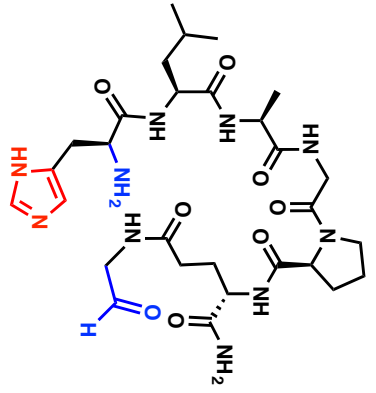

S22

<sup>1</sup>H, DMSO-d<sub>6</sub>, 600 MHz

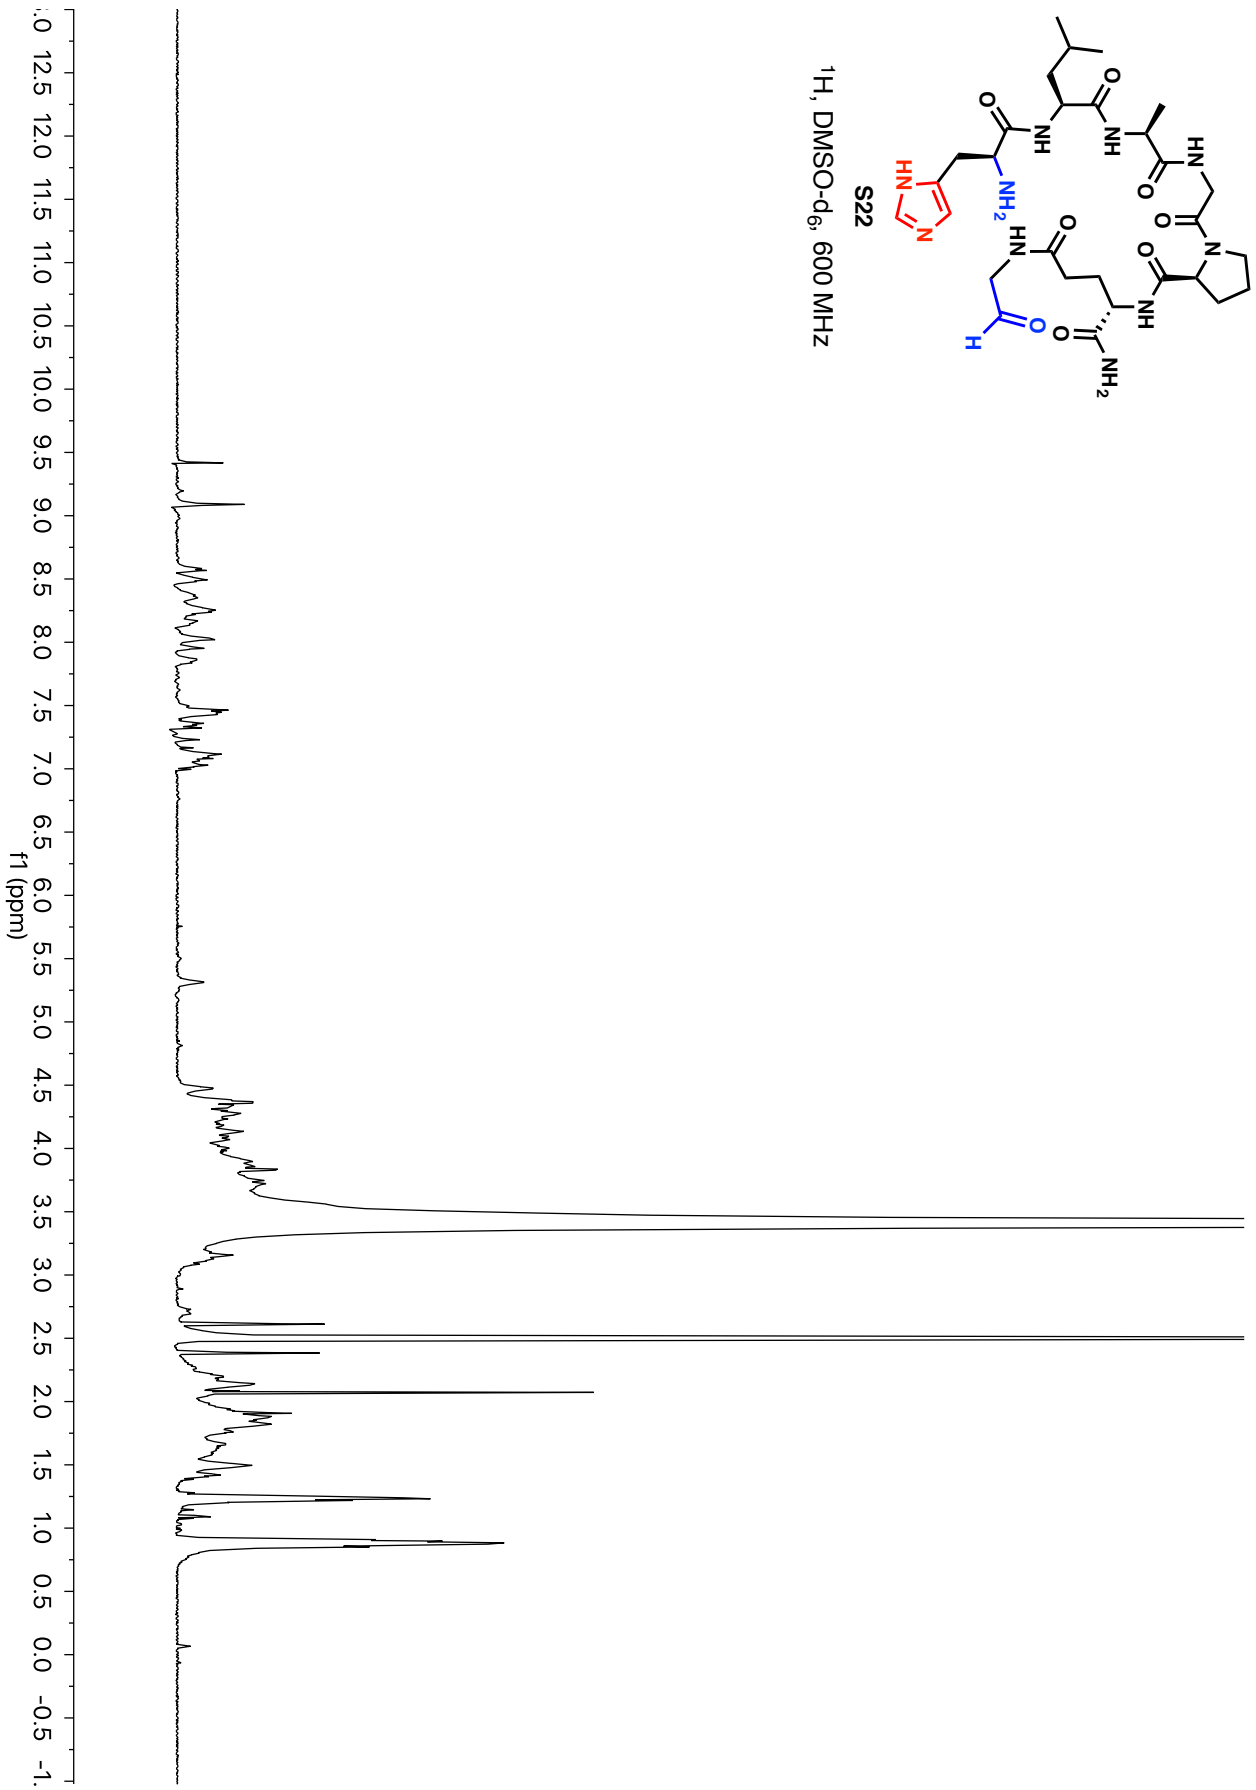

## Peptide S23

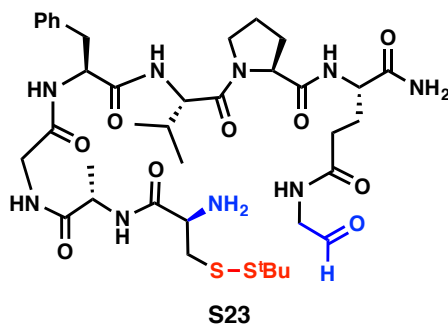

Amino aldehyde **S23** was prepared on a 23  $\mu\text{mol}$  scale on Rink amide resin using standard Fmoc-SPPS. The aldehyde was incorporated according to general procedure 1. Following cleavage from the resin and ether precipitation, the crude peptide was purified by preparative reverse-phase HPLC (15% B for 5 min, then 15% B to 60% B over 30 min) to afford peptide **S23** (6.2 mg, 32% yield based on the original resin loading) as a white solid following lyophilization.



Purified peptide **S23** ( $R_t = 12.8$  min, 5 to 100% B over 25 min,  $\lambda = 230$  nm).



LRMS (ESI-TOF): calc'd for  $\text{C}_{38}\text{H}_{60}\text{N}_9\text{O}_9\text{S}_2$   $[\text{M}+\text{H}]^+$  850.40; found 850.31.

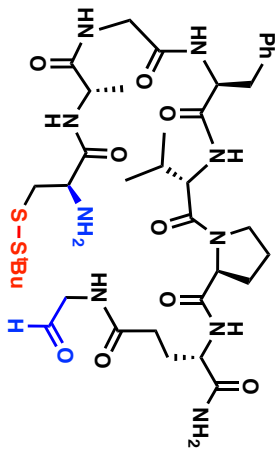

S23  
 $^1\text{H}$ , DMSO- $d_6$ , 600 MHz

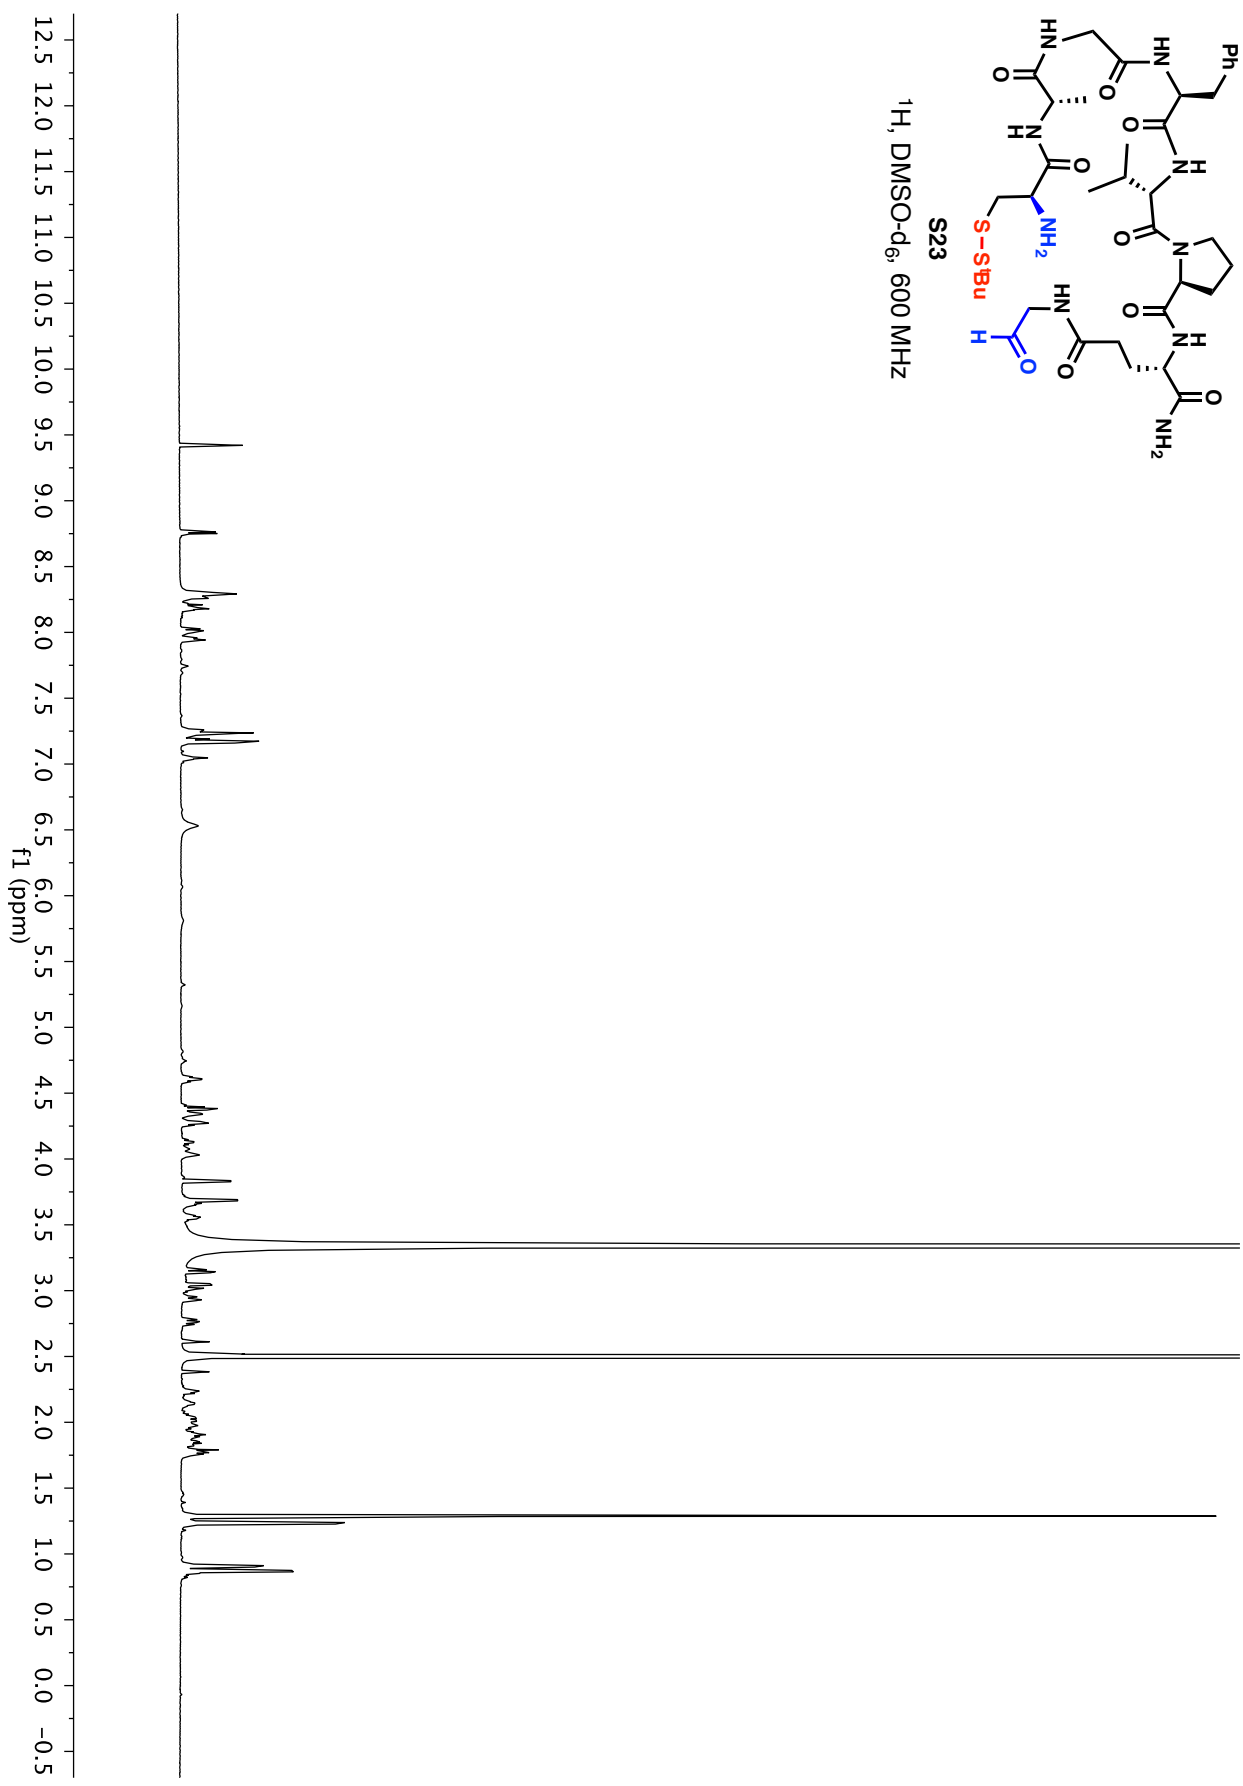



## Peptide S24

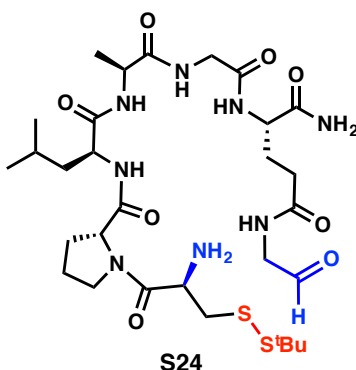

Amino aldehyde **S24** was prepared on a 113  $\mu\text{mol}$  scale on Rink amide resin using standard Fmoc-SPPS. The aldehyde was incorporated according to general procedure 1. Following cleavage from the resin and ether precipitation, the crude peptide was purified by preparative reverse-phase HPLC (5% B for 5 min, then 5% B to 40% B over 30 min) to afford peptide **S24** (27.1mg, 34% yield based on the original resin loading) as a white solid following lyophilization.

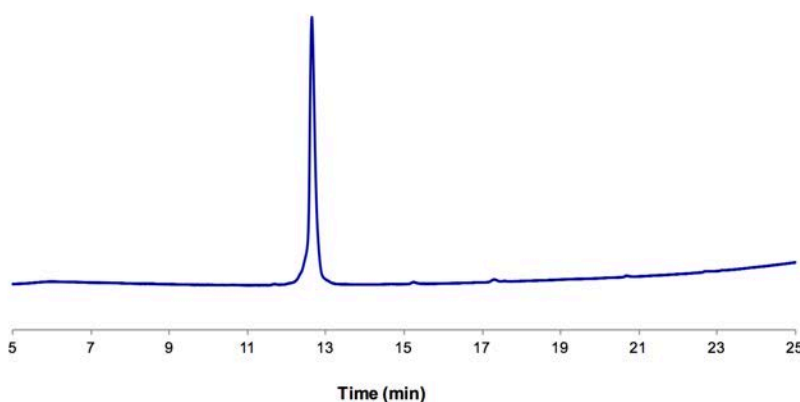

Purified peptide **S24** ( $R_t = 12.64$  min, 5 to 100% B over 25 min,  $\lambda = 230$  nm).

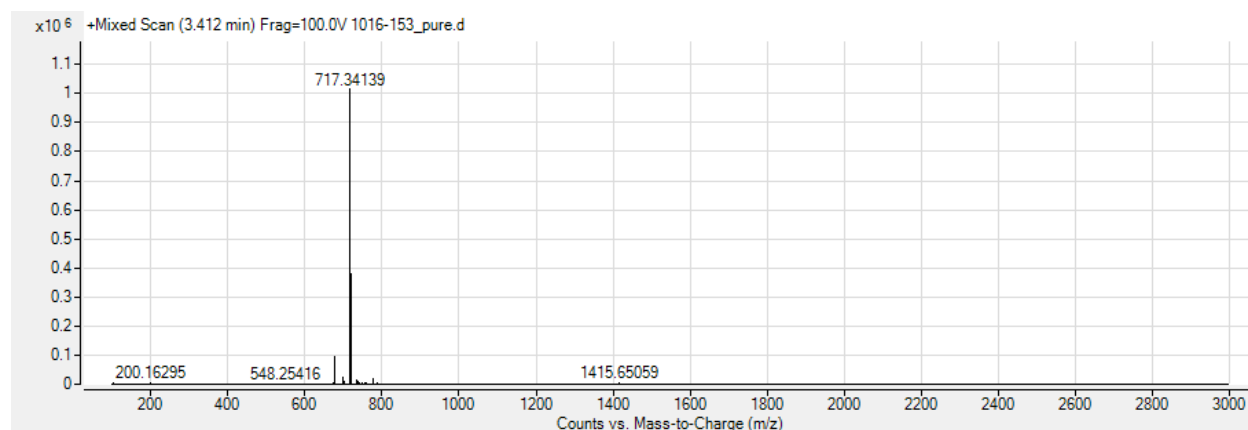

LRMS (ESI-TOF): calc'd for  $\text{C}_{26}\text{H}_{41}\text{N}_9\text{O}_7$   $[\text{M}+\text{H}]^+$  717.34; found 717.34.

<sup>1</sup>H, DMSO-d<sub>6</sub>, 600 MHz

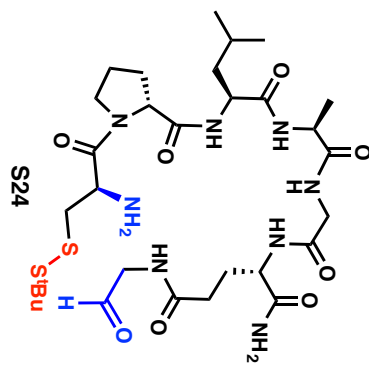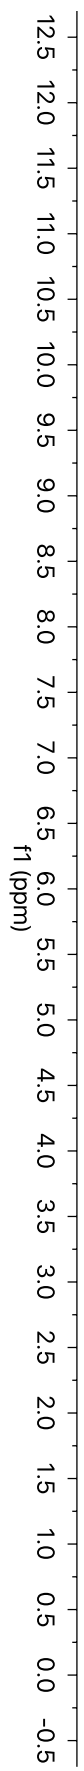

## Peptide S25

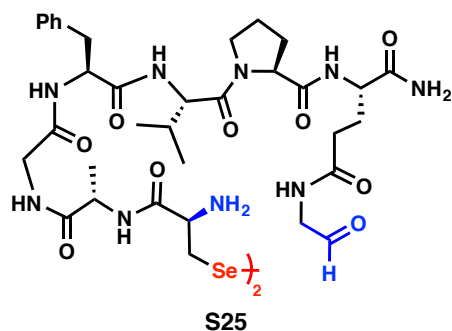

Amino aldehyde **S25** was prepared on a 40  $\mu$ mol scale on Rink amide resin using standard Fmoc-SPPS. The aldehyde was incorporated according to general procedure 1. Following cleavage from the resin and ether precipitation, the crude peptide was purified by preparative reverse-phase HPLC (15% B for 5 min, then 15% B to 50% B over 25 min) to afford peptide **S25** (5.8 mg, 18% yield based on the original resin loading) as a white solid following lyophilization.

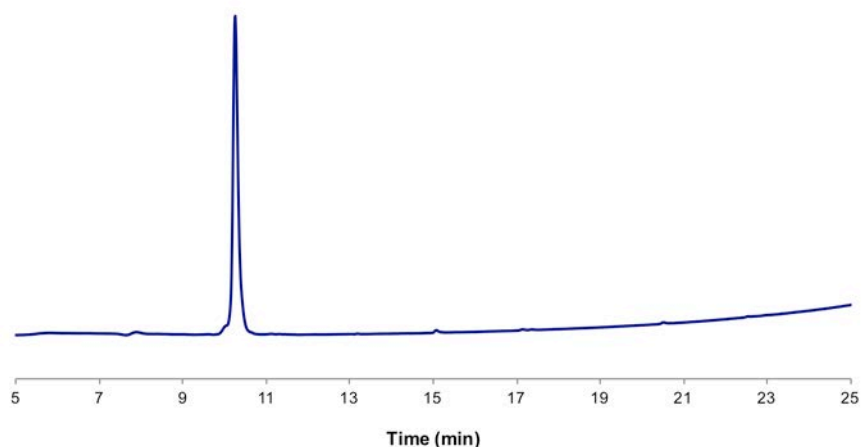

Purified peptide **S25** (Rt = 10.2 min, 5 to 100% B over 25 min,  $\lambda$  = 230 nm).

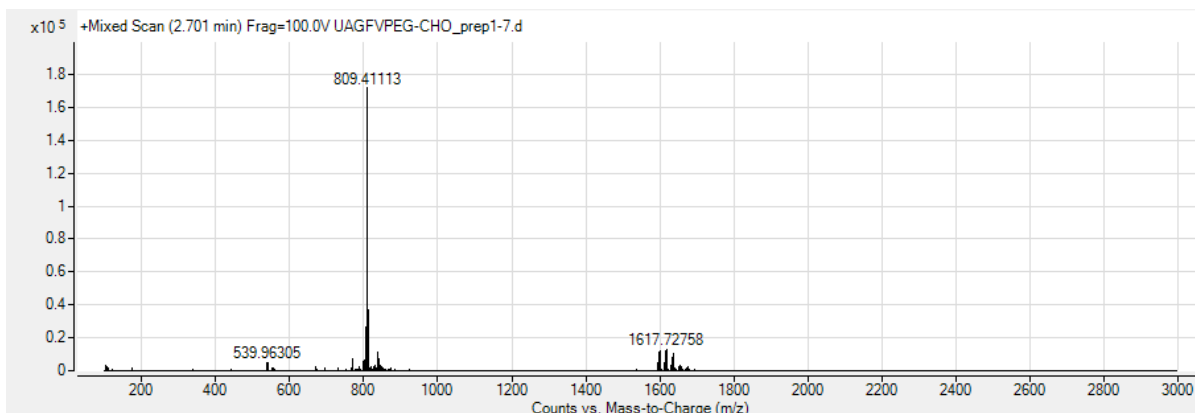

**LRMS (ESI-TOF):** calc'd for C<sub>68</sub>H<sub>101</sub>N<sub>18</sub>O<sub>18</sub>Se<sub>2</sub> [M+H]<sup>+</sup> 1617.59; found 1617.73, [M+2H]<sup>2+</sup> 809.30; found 809.41.

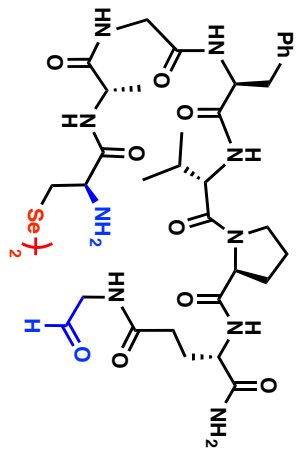

<sup>1</sup>H, DMSO-d<sub>6</sub>, 600 MHz

S25

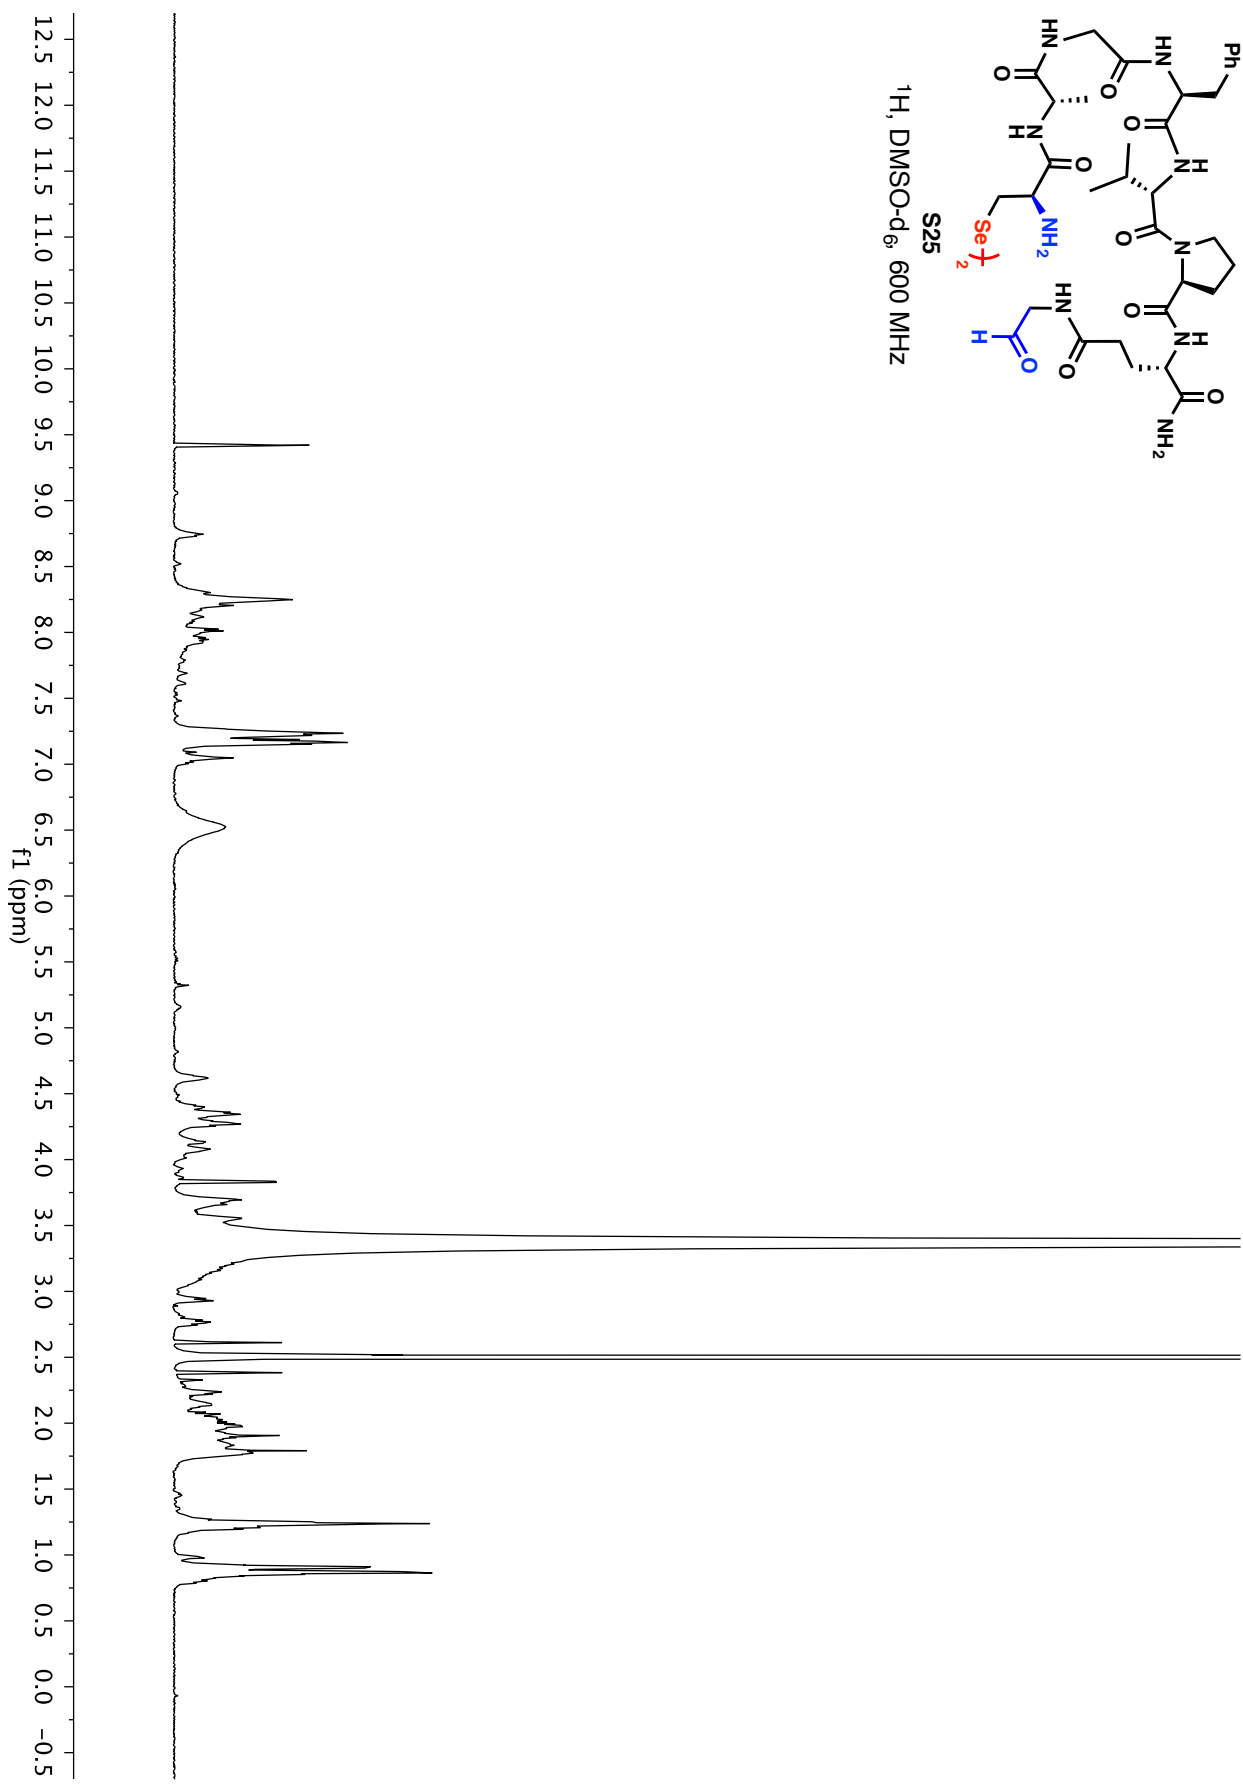

## Characterization Data for Strecker Macrocyclization

### Peptide 1

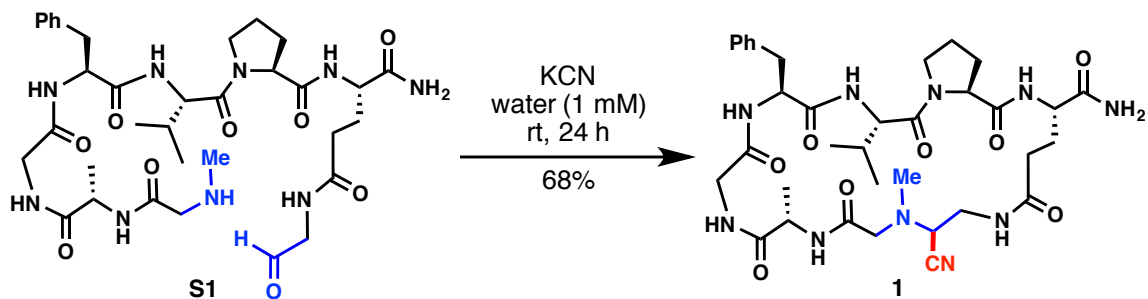

Peptide **1** was prepared according to general procedure 3 from linear amino aldehyde **S1** (5.8 mg, 7.9  $\mu\text{mol}$ ). At  $t = 24$  h, the reaction was purified by preparative reverse-phase HPLC (20% B for 5 min, then 20% to 50% B over 30 min) to afford peptide macrocycle **1** (4.0 mg, 68% yield) as a mixture of diastereomers and as a white solid following lyophilization.

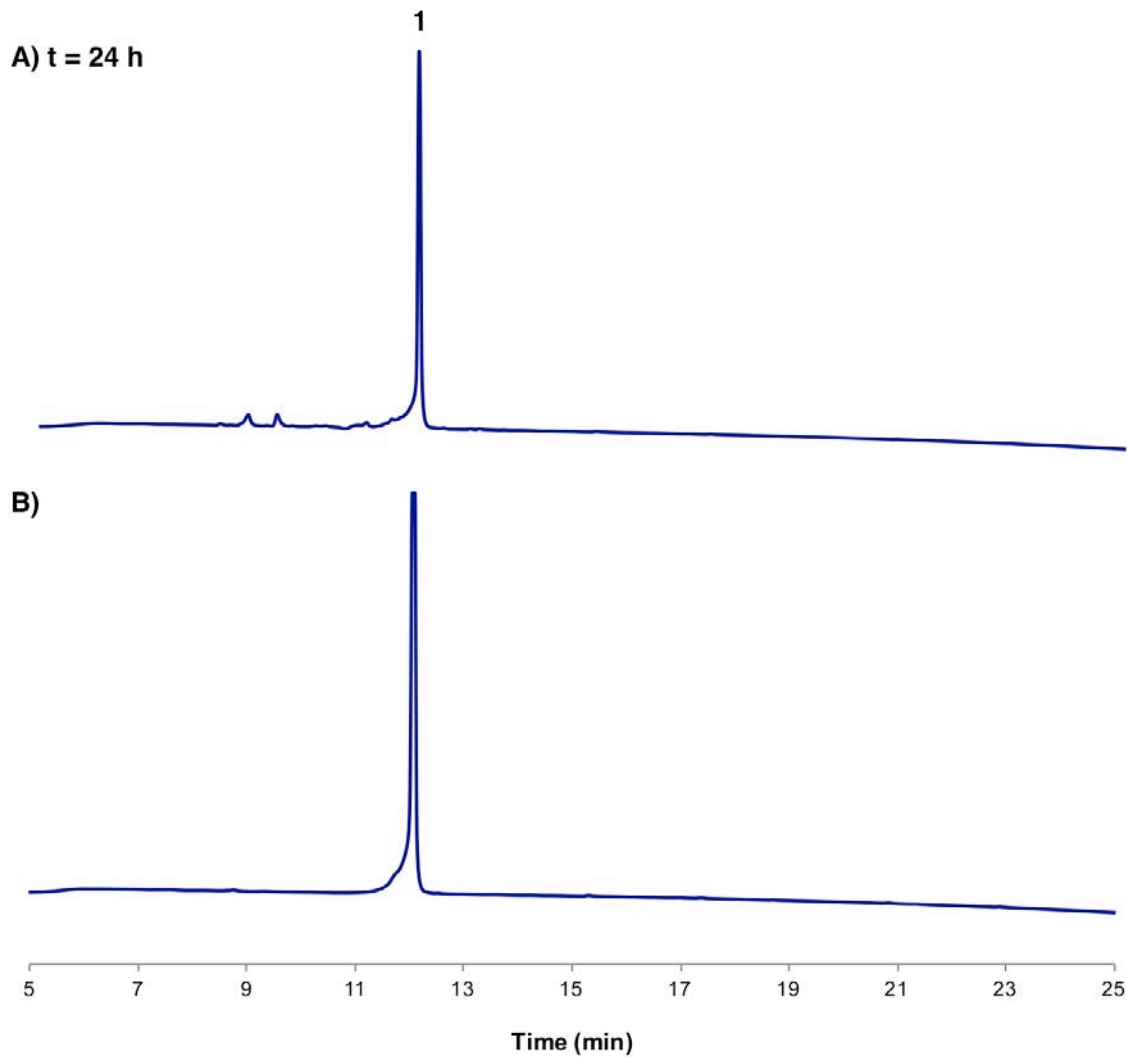

**A)** Crude analytical HPLC trace of the formation of **1** from amino aldehyde **S1** following Strecker macrocyclization (5 to 100% B over 25 min,  $\lambda = 210$  nm). **B)** Purified peptide **1** ( $R_t = 12.1$  min, 5 to 100% B over 25 min,  $\lambda = 210$  nm).

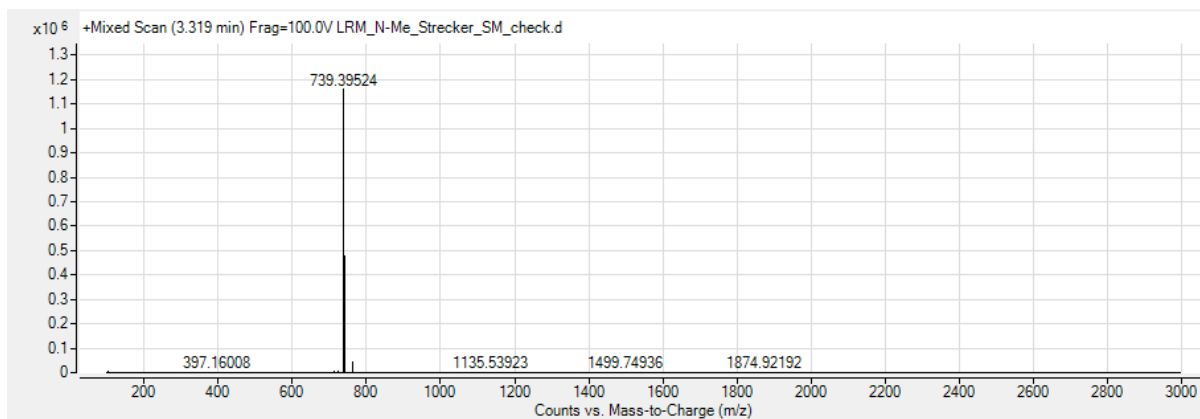

**LRMS (ESI-TOF):** calc'd for  $C_{35}H_{51}N_{10}O_8$   $[M+H]^+$  739.39; found 739.40.

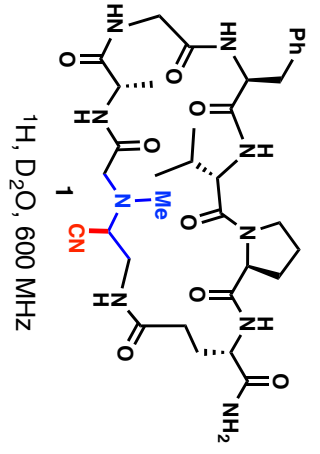

<sup>1</sup>H, D<sub>2</sub>O, 600 MHz

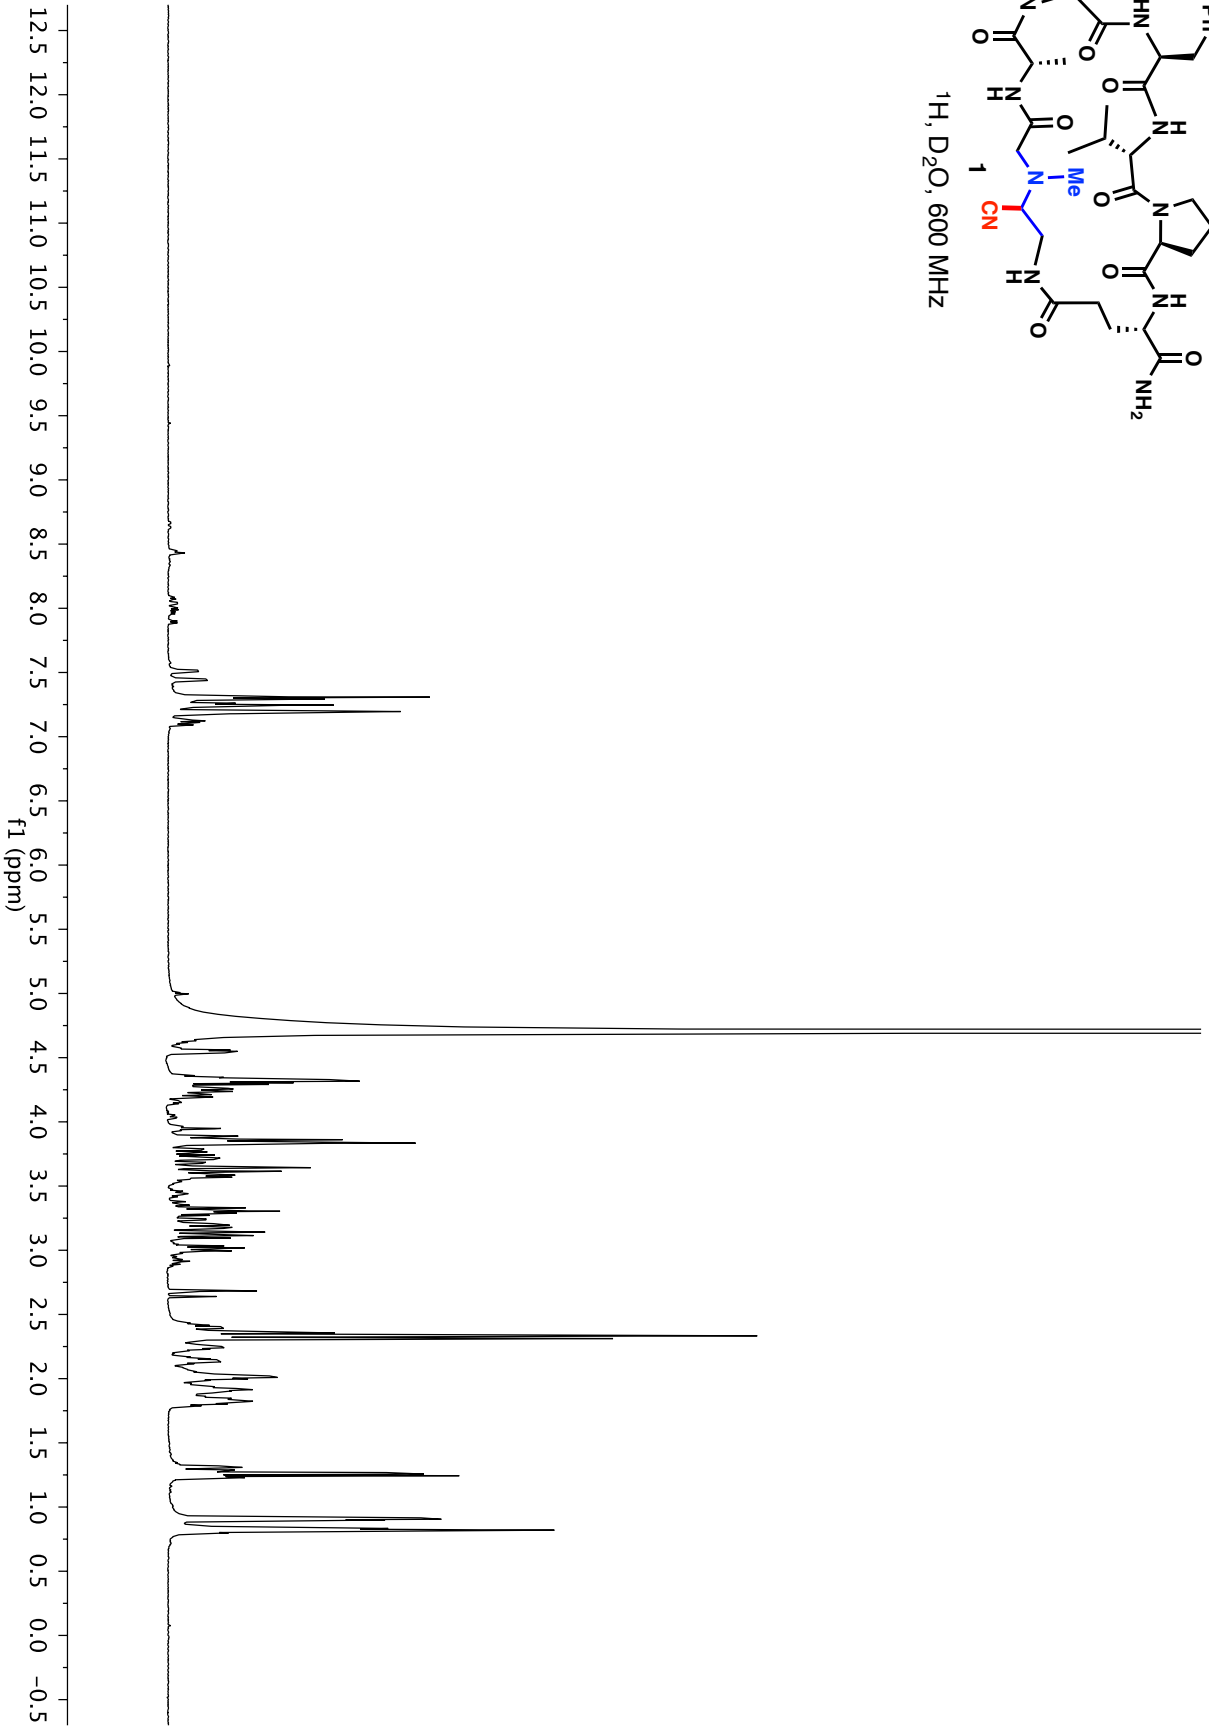

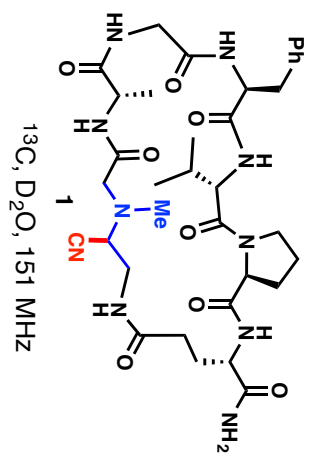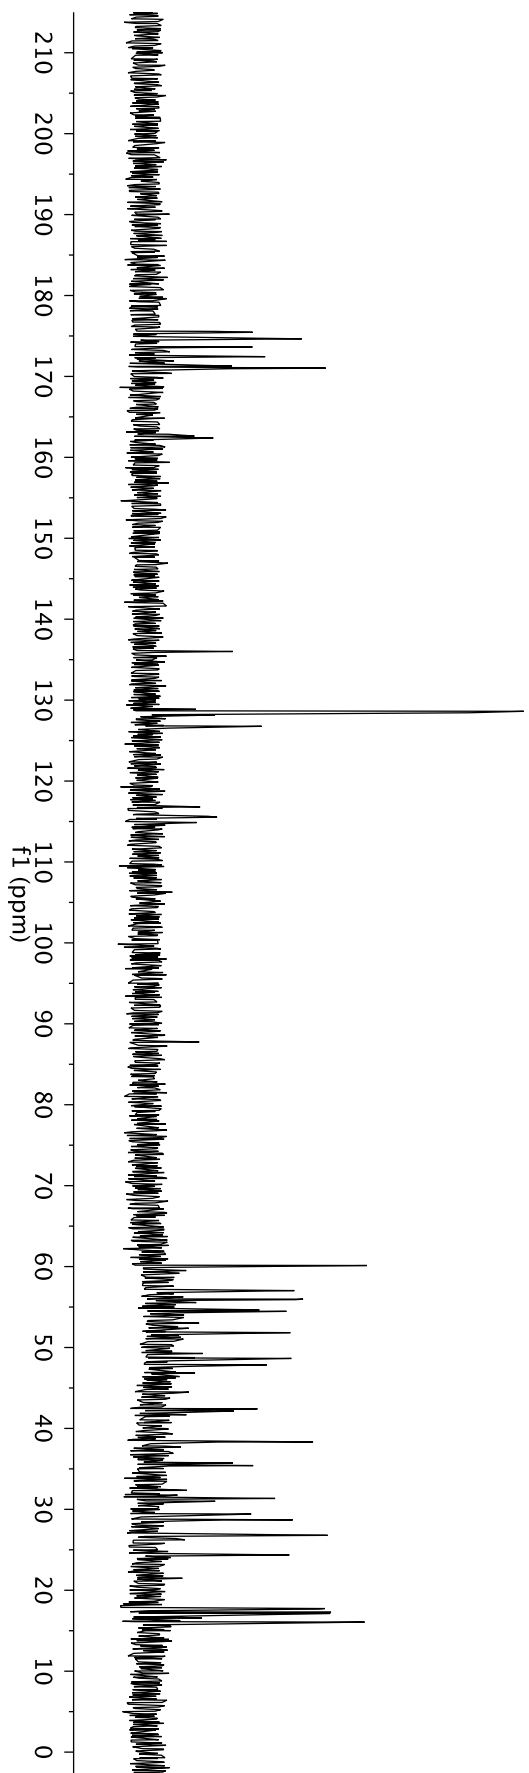



## Peptide 2

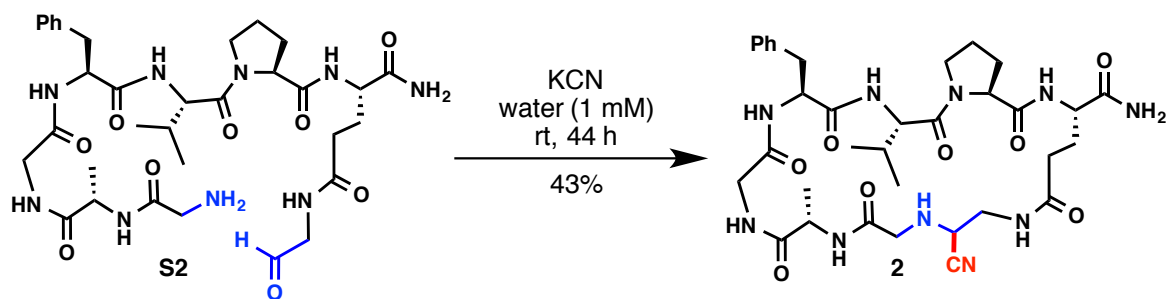

Peptide **2** was prepared according to general procedure 3 from linear amino aldehyde **S2** (3.7 mg, 5.2  $\mu\text{mol}$ ). At  $t = 44$  h, the reaction was purified by preparative reverse-phase HPLC (5% B for 5 min, 5% B to 20% B over 5 min, then 20% to 55% B over 30 min) to afford peptide macrocycle **2** (1.6 mg, 43% yield) as a mixture of diastereomers and as a white solid following lyophilization.

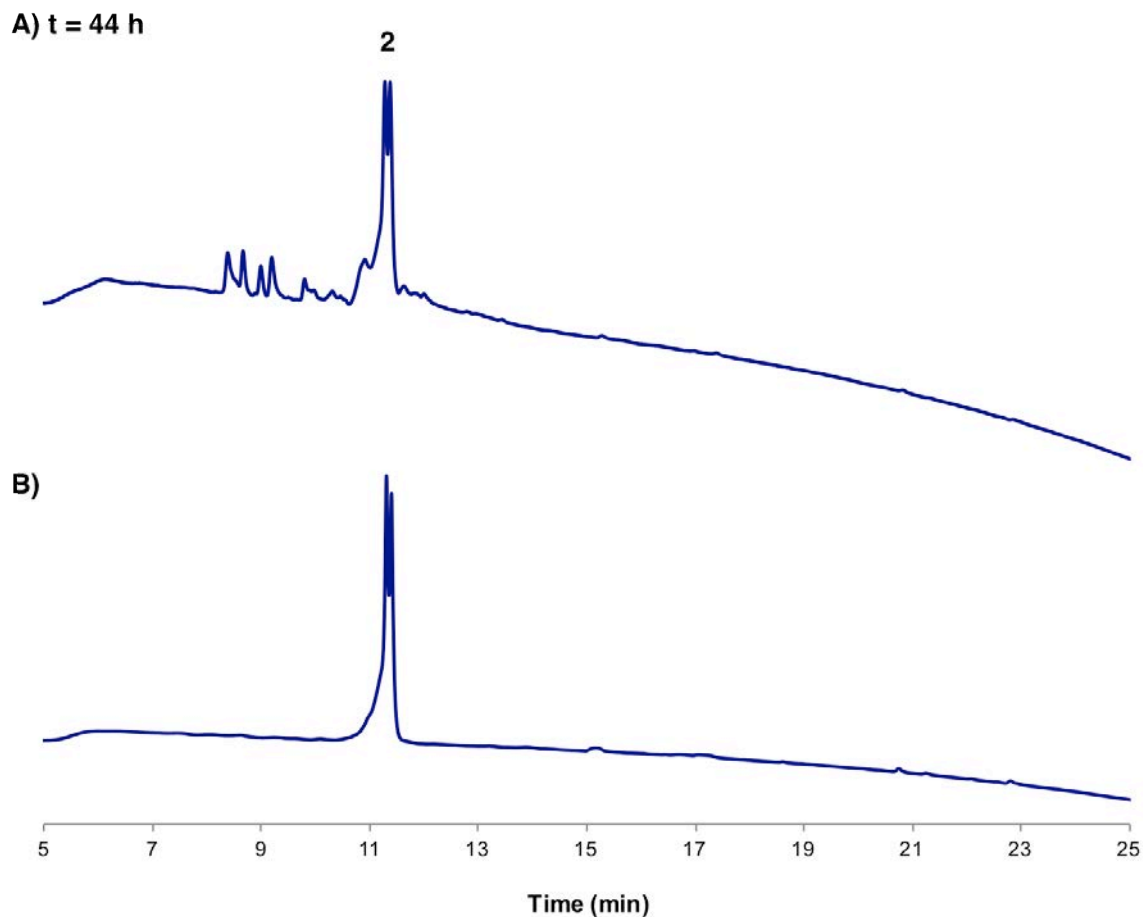

**A)** Crude analytical HPLC trace of the formation of **2** from amino aldehyde **S2** following Strecker macrocyclization (5 to 100% B over 25 min,  $\lambda = 210$  nm). **B)** Purified peptide **2** ( $R_t = 11.3, 11.4$  min, 5 to 100% B over 25 min,  $\lambda = 210$  nm).

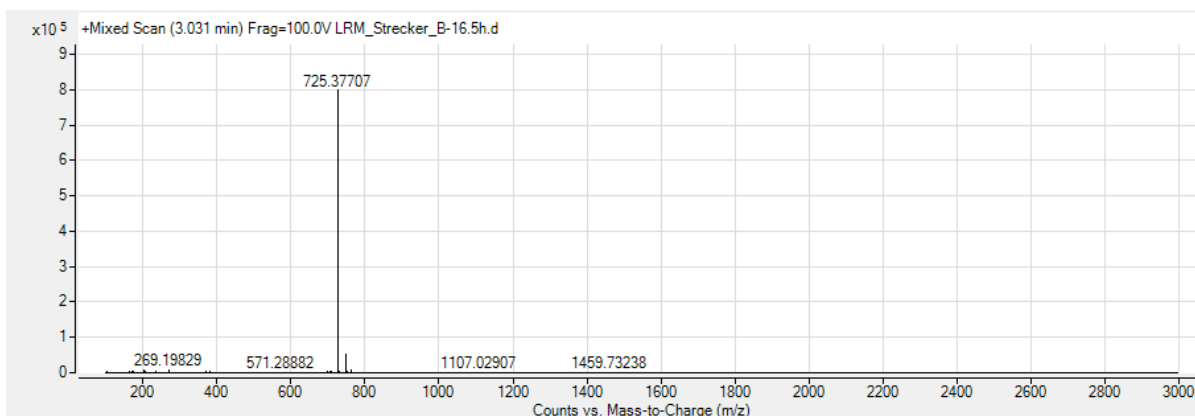

**LRMS (ESI-TOF):** calc'd for  $C_{34}H_{49}N_{10}O_8$   $[M+H]^+$  725.37; found 725.38.

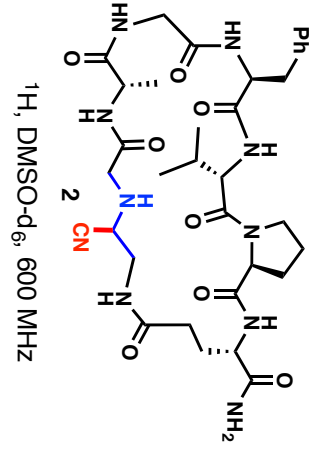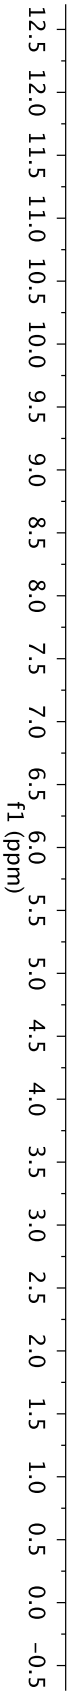

**2**  
COSY, DMSO-d<sub>6</sub>, 600 MHz

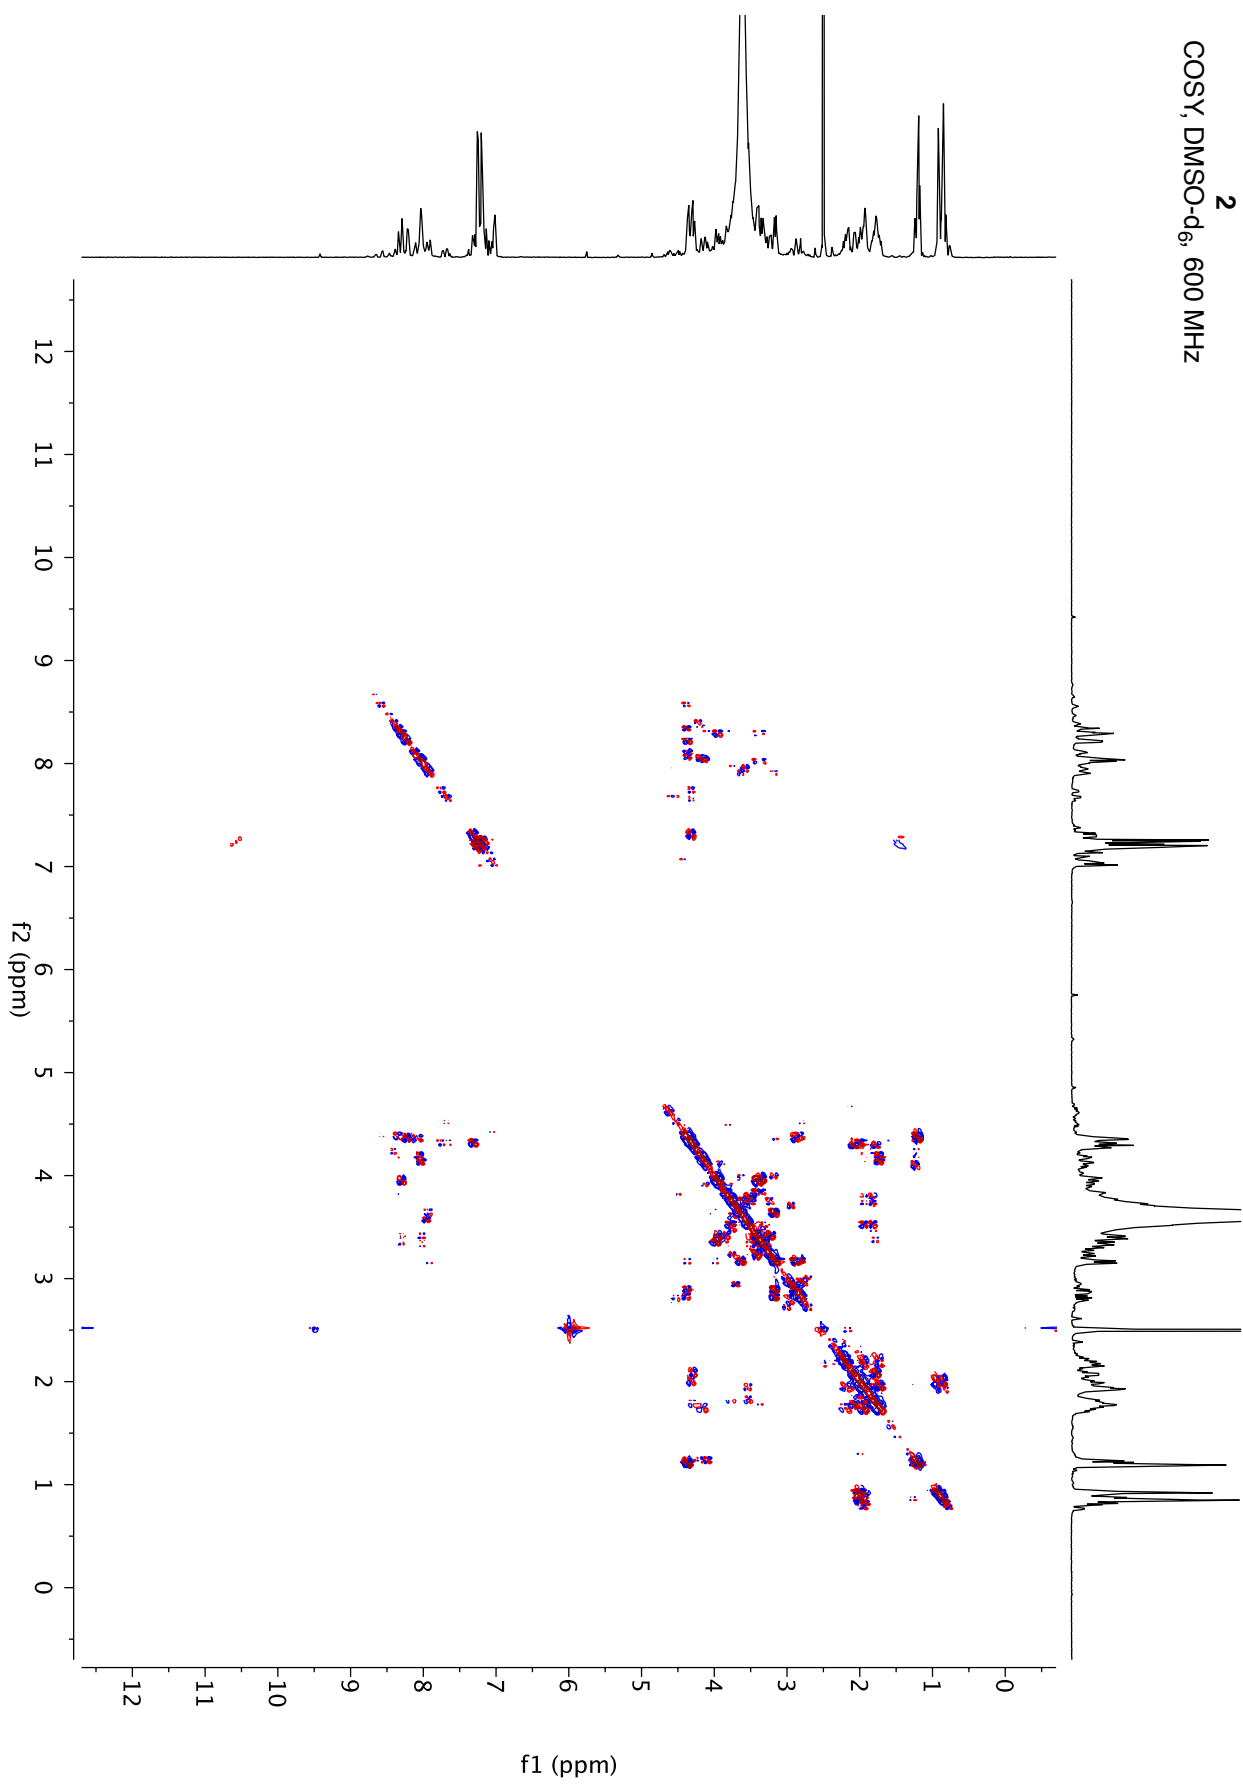

### Peptide 3

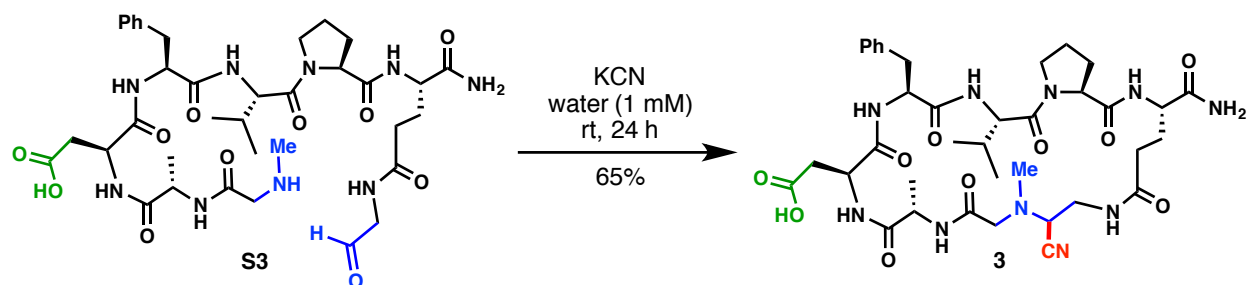

Peptide **3** was prepared according to general procedure 3 from linear amino aldehyde **S3** (10.0 mg, 13  $\mu$ mol). At  $t = 24$  h, the reaction was purified by preparative reverse-phase HPLC (10% B for 5 min, then 10% B to 55% B over 30 min) to afford peptide macrocycle **3** (6.6 mg, 65% yield) as an inseparable mixture of diastereomers and as a white solid following lyophilization.

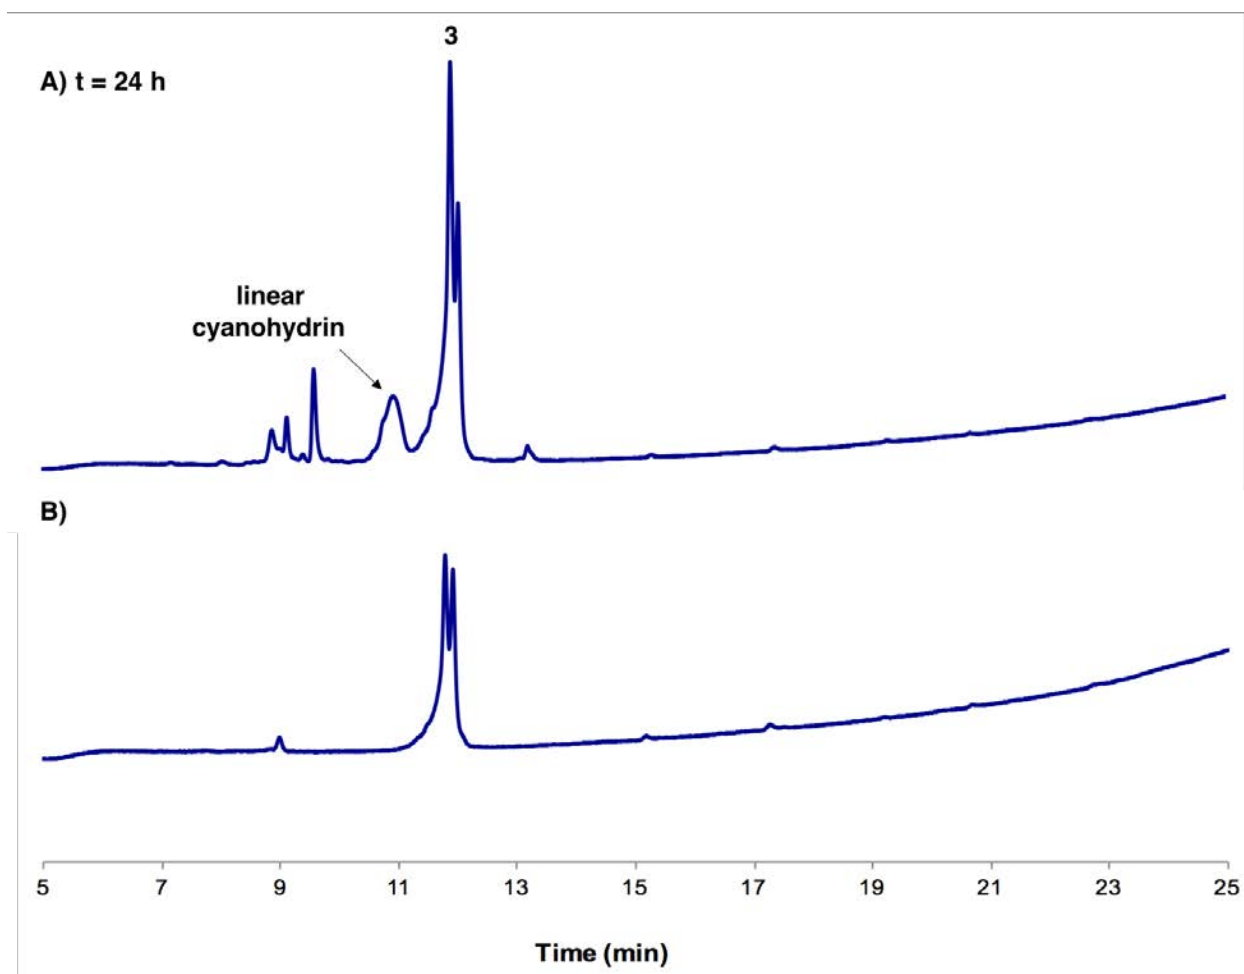

**A)** Crude analytical HPLC trace of the formation of **3** from amino aldehyde **S3** following Strecker macrocyclization (5 to 100% B over 25 min,  $\lambda = 230$  nm). **B)** Purified peptide **3** ( $R_t = 11.8, 11.9$  min, 5 to 100% B over 25 min,  $\lambda = 230$  nm).

*Note: Diastereomers were inseparable by preparative reverse-phase HPLC.*

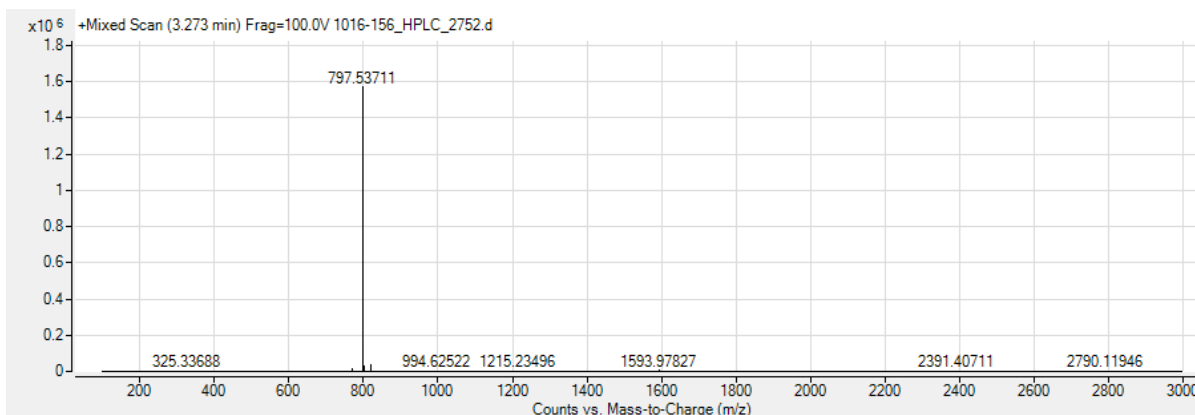

**LRMS (ESI-TOF):** calc'd for  $C_{37}H_{52}N_{10}O_{10}$   $[M+H]^+$  797.39; found 797.54.

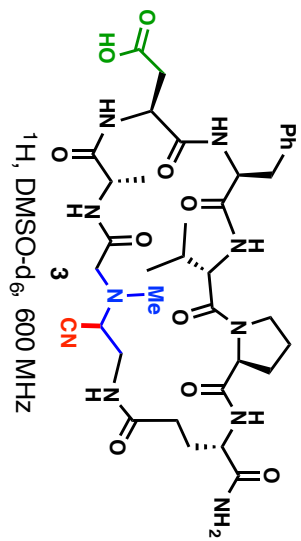

<sup>1</sup>H, DMSO-d<sub>6</sub>, 600 MHz

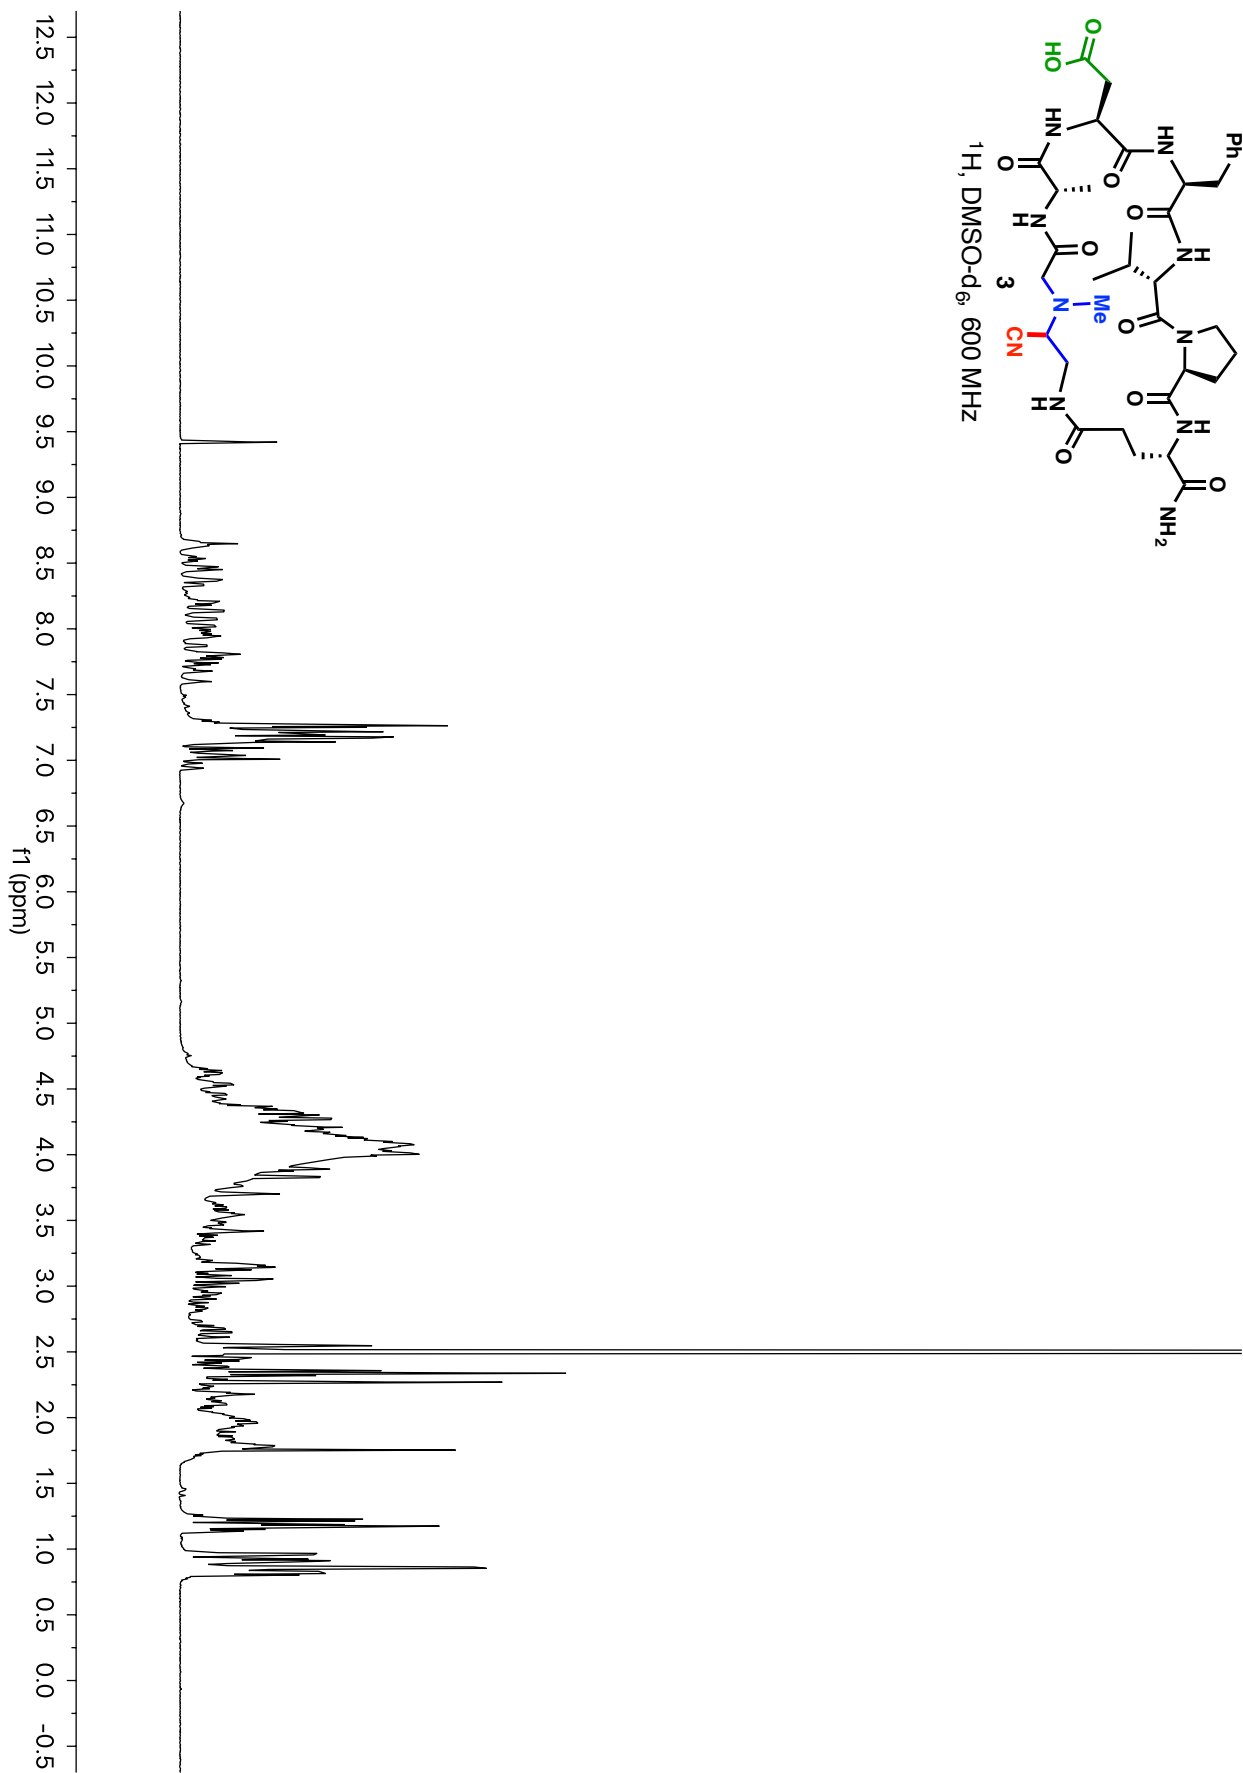

3  
COSY, DMSO-d<sub>6</sub>, 600 MHz

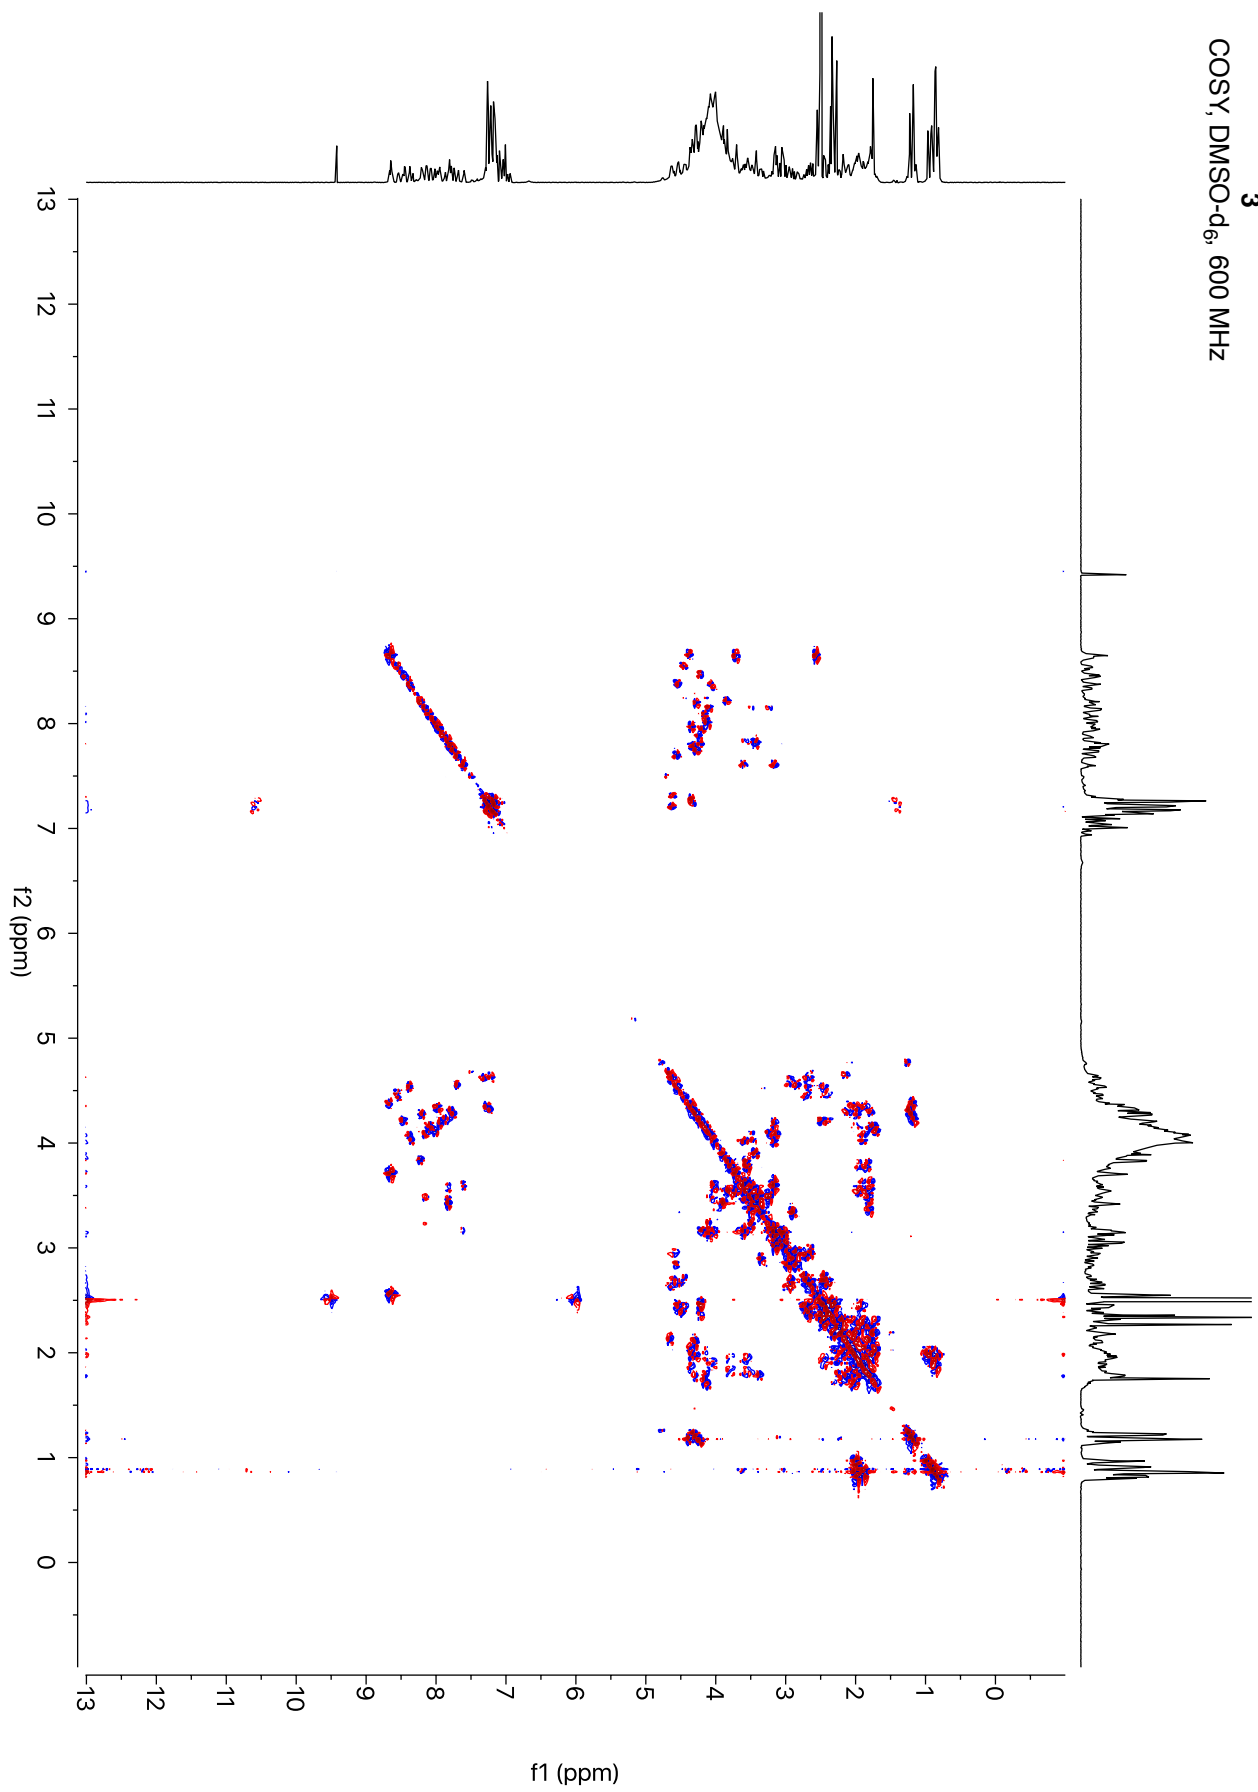

S92



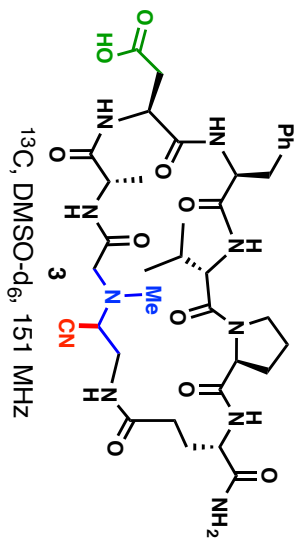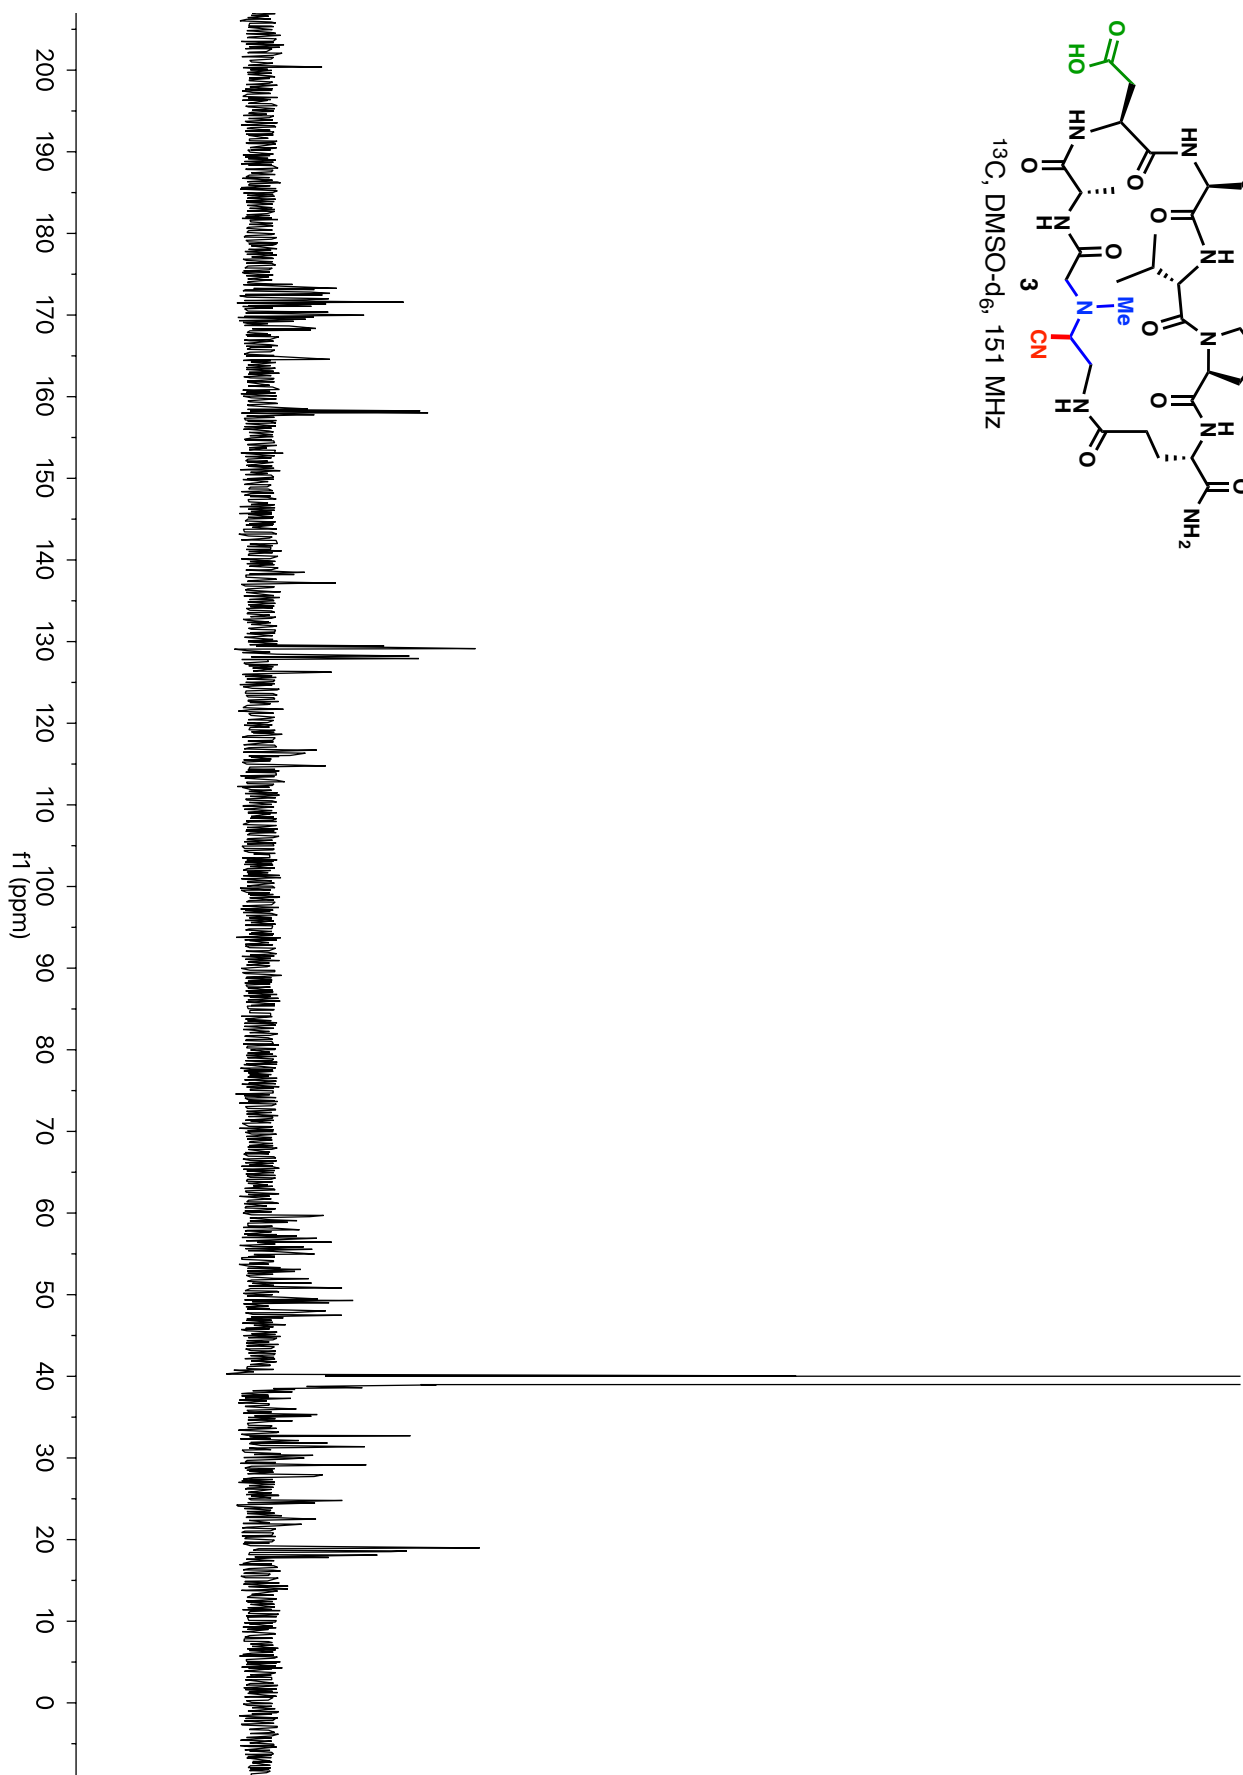

## Peptide 4

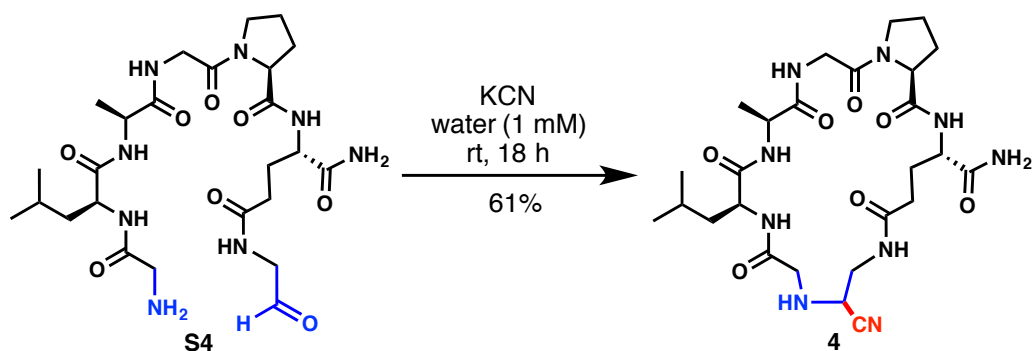

Peptide **4** was prepared according to general procedure 3 from linear amino aldehyde **S4** (10.0 mg, 17  $\mu$ mol). At  $t = 18$  h, the reaction was purified by preparative reverse-phase HPLC (10% B for 5 min, 10% B to 50% B over 30 min) to afford peptide macrocycle **4** (6.1 mg, 61% yield) as a mixture of diastereomers and as a white solid following lyophilization.

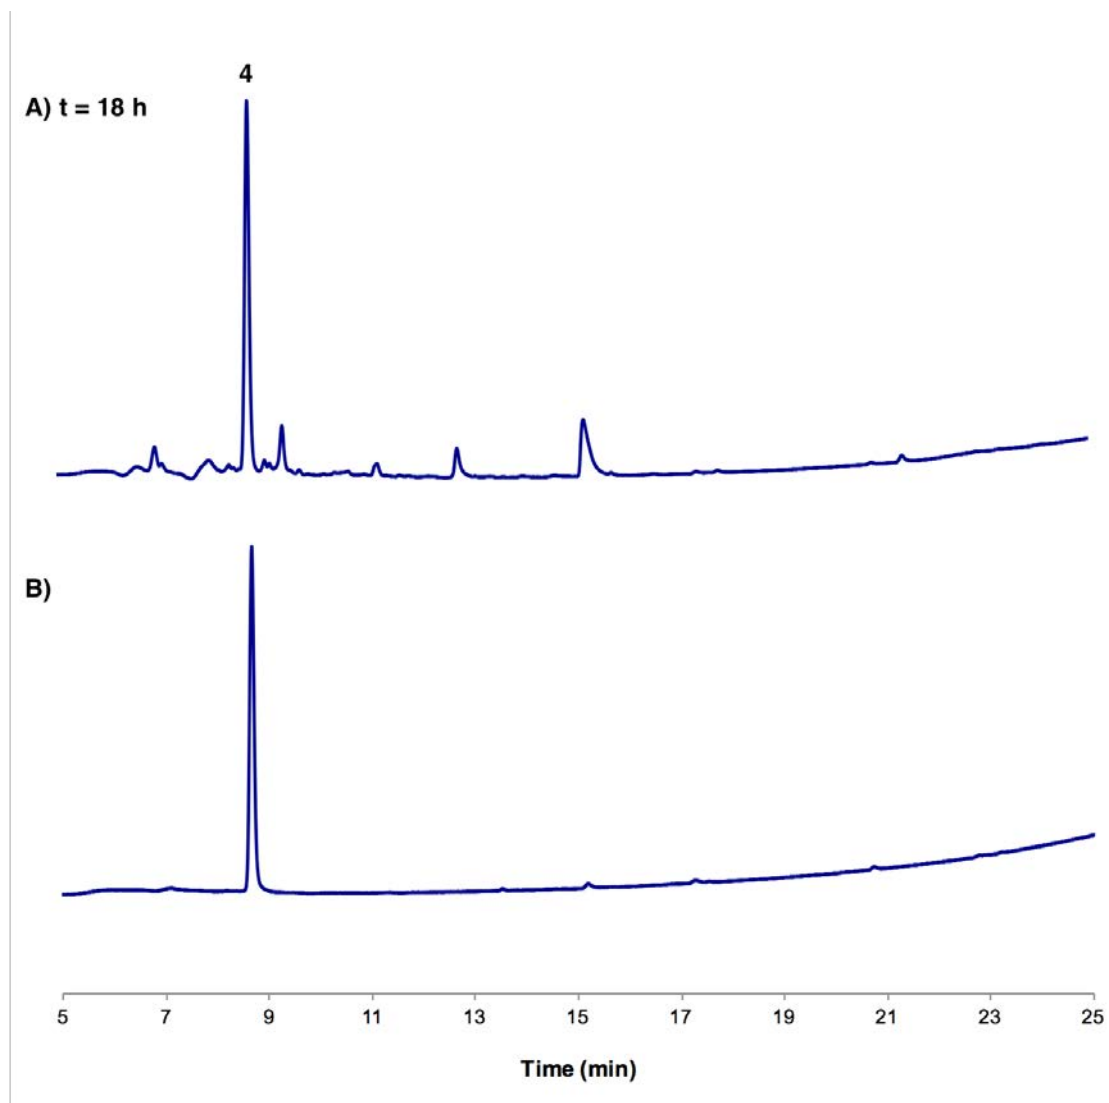

**A)** Crude analytical HPLC trace of the formation of **4** from amino aldehyde **S4** following Strecker macrocyclization (5 to 100% B over 25 min,  $\lambda = 230$  nm). **B)** Purified peptide **4** ( $R_t = 8.7$  min, 5 to 100% B over 25 min,  $\lambda = 230$  nm).

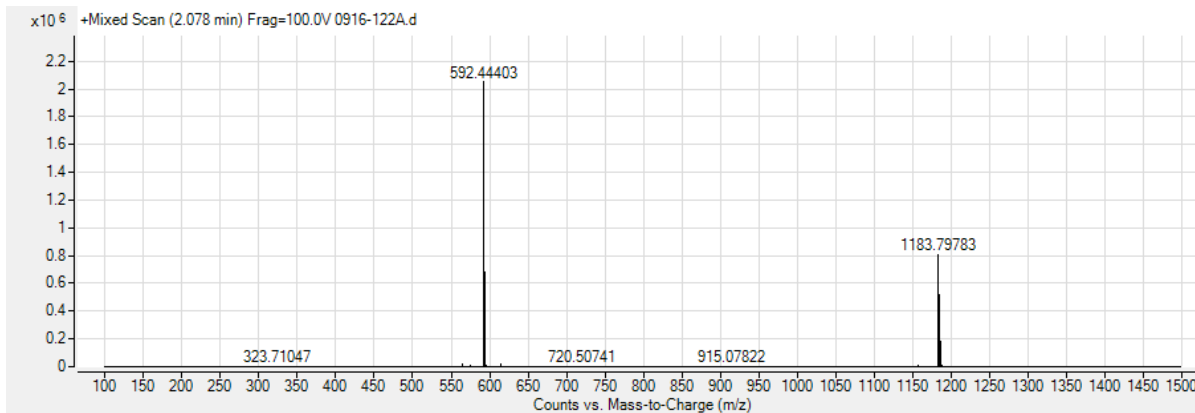

**LRMS (ESI-TOF):** calc'd for  $C_{26}H_{41}N_9O_7$   $[M+H]^+$  592.32; found 592.44.

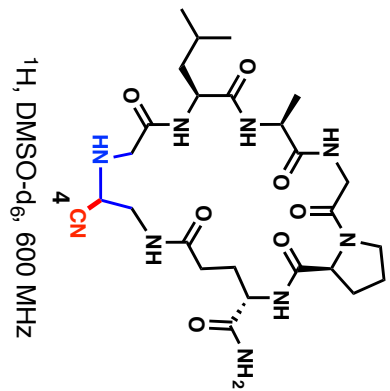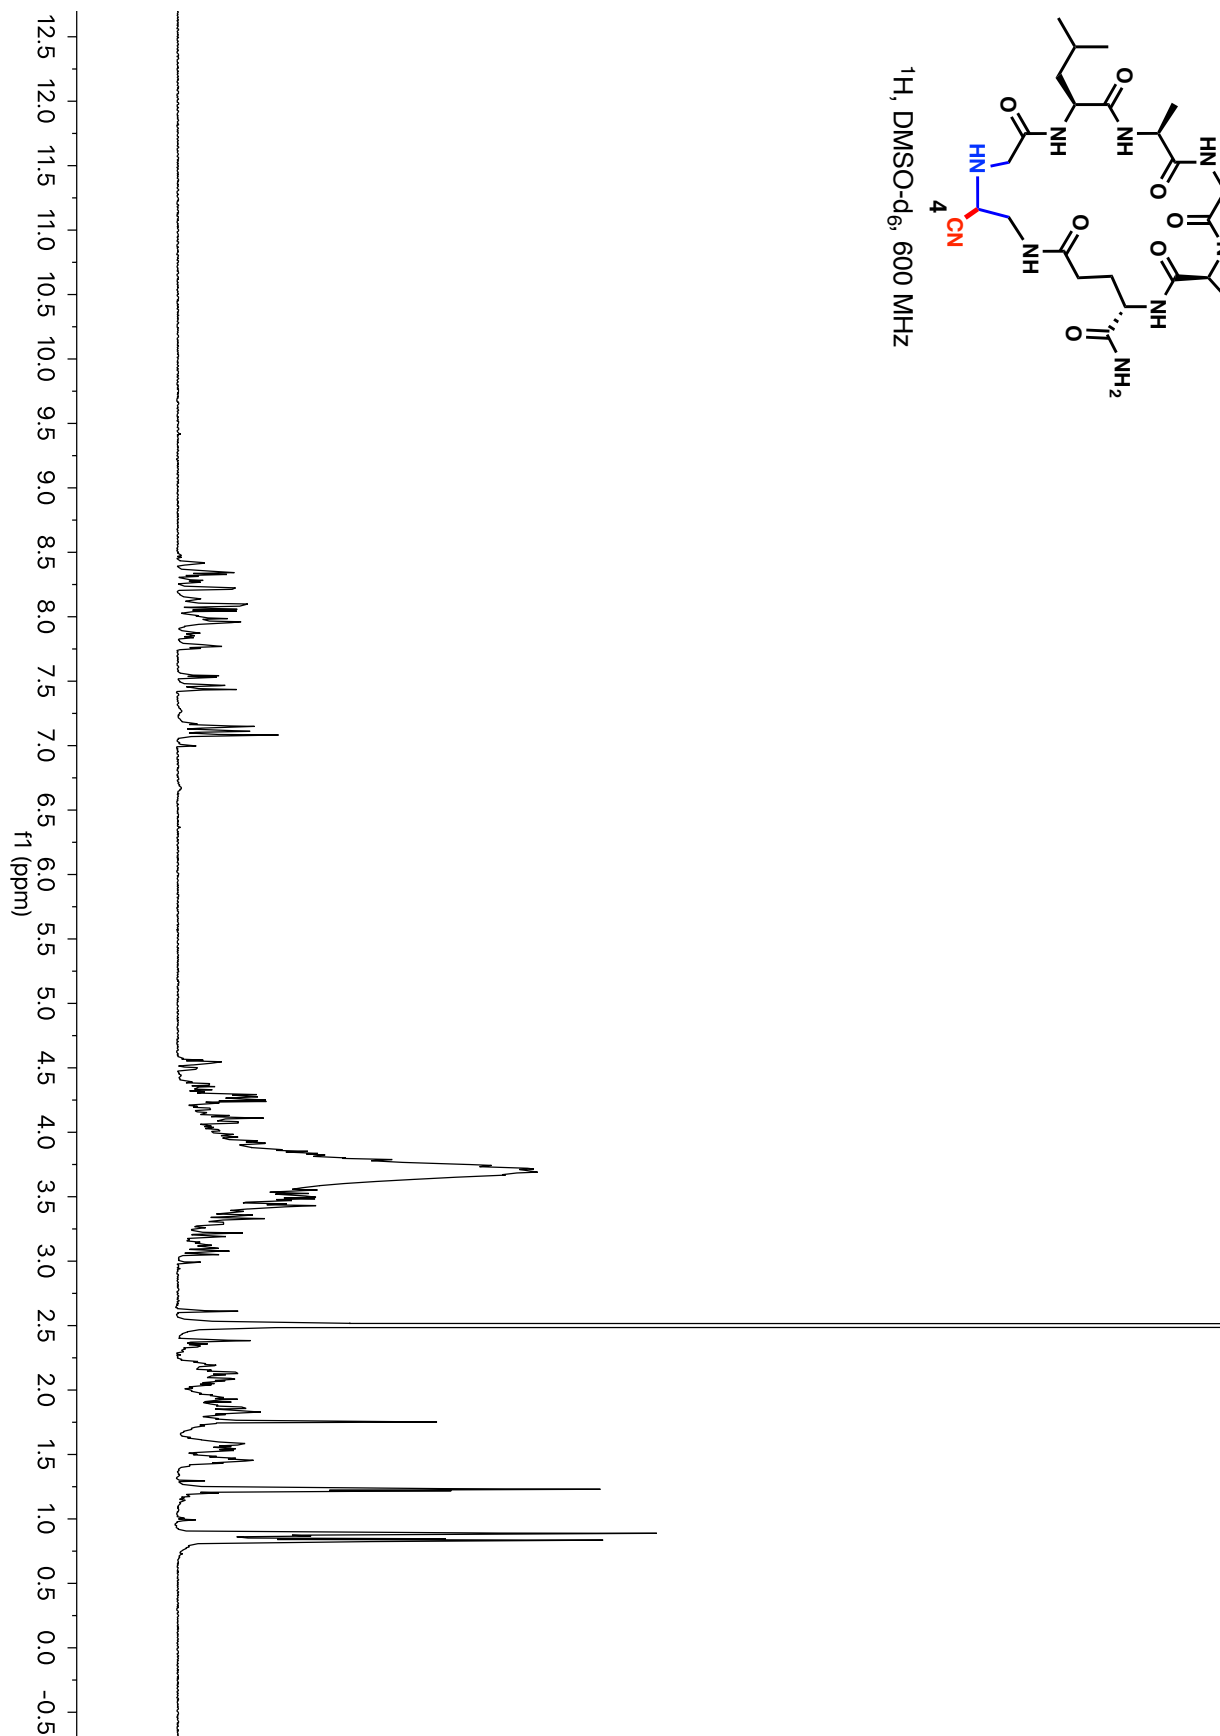

4  
COSY, DMSO-d<sub>6</sub>, 600 MHz

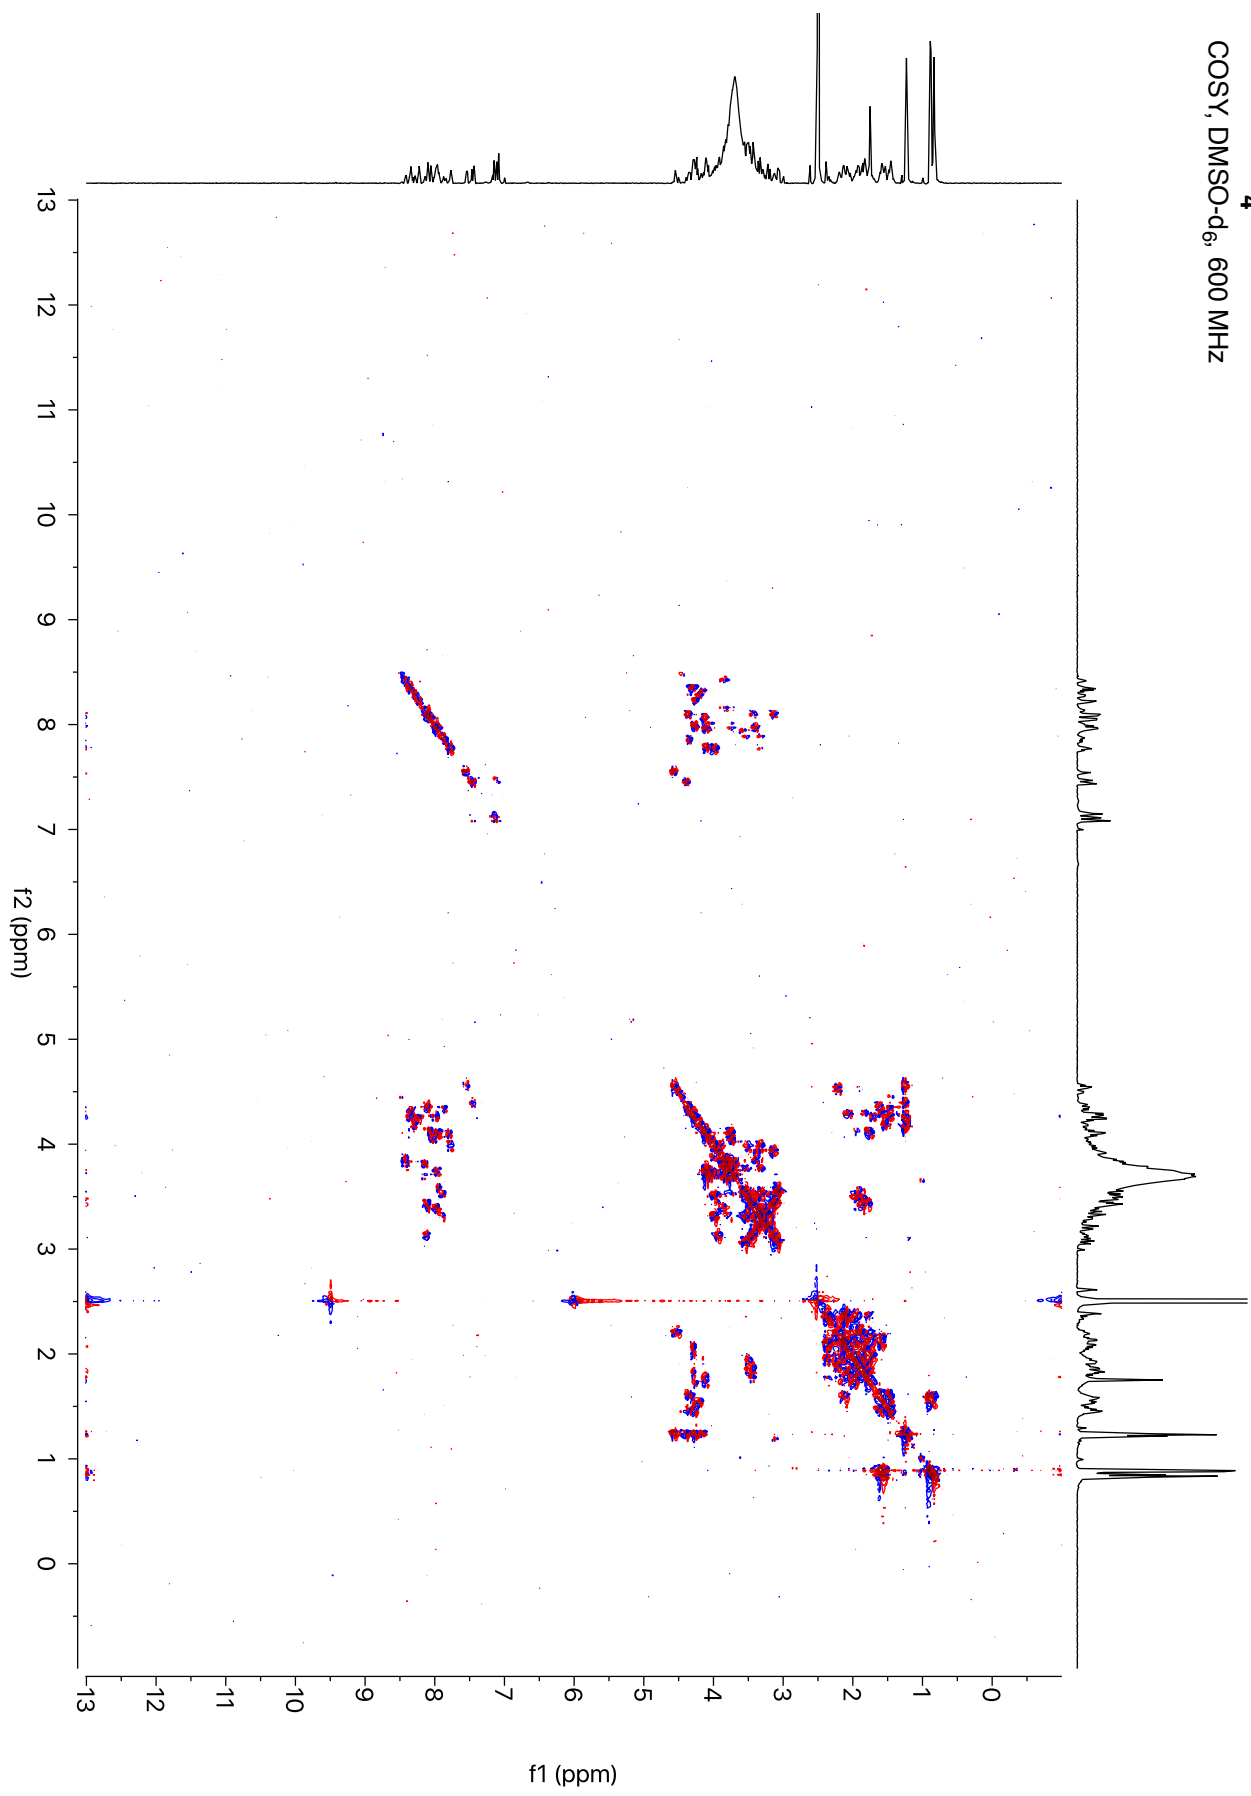

f1 (ppm)

S97

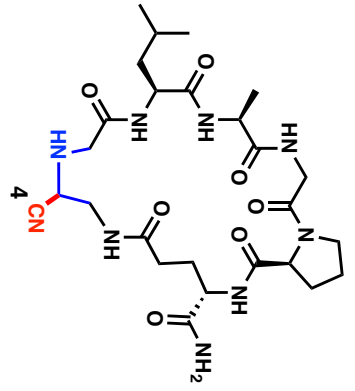

$^{13}\text{C}$ , DMSO- $d_6$ , 151 MHz

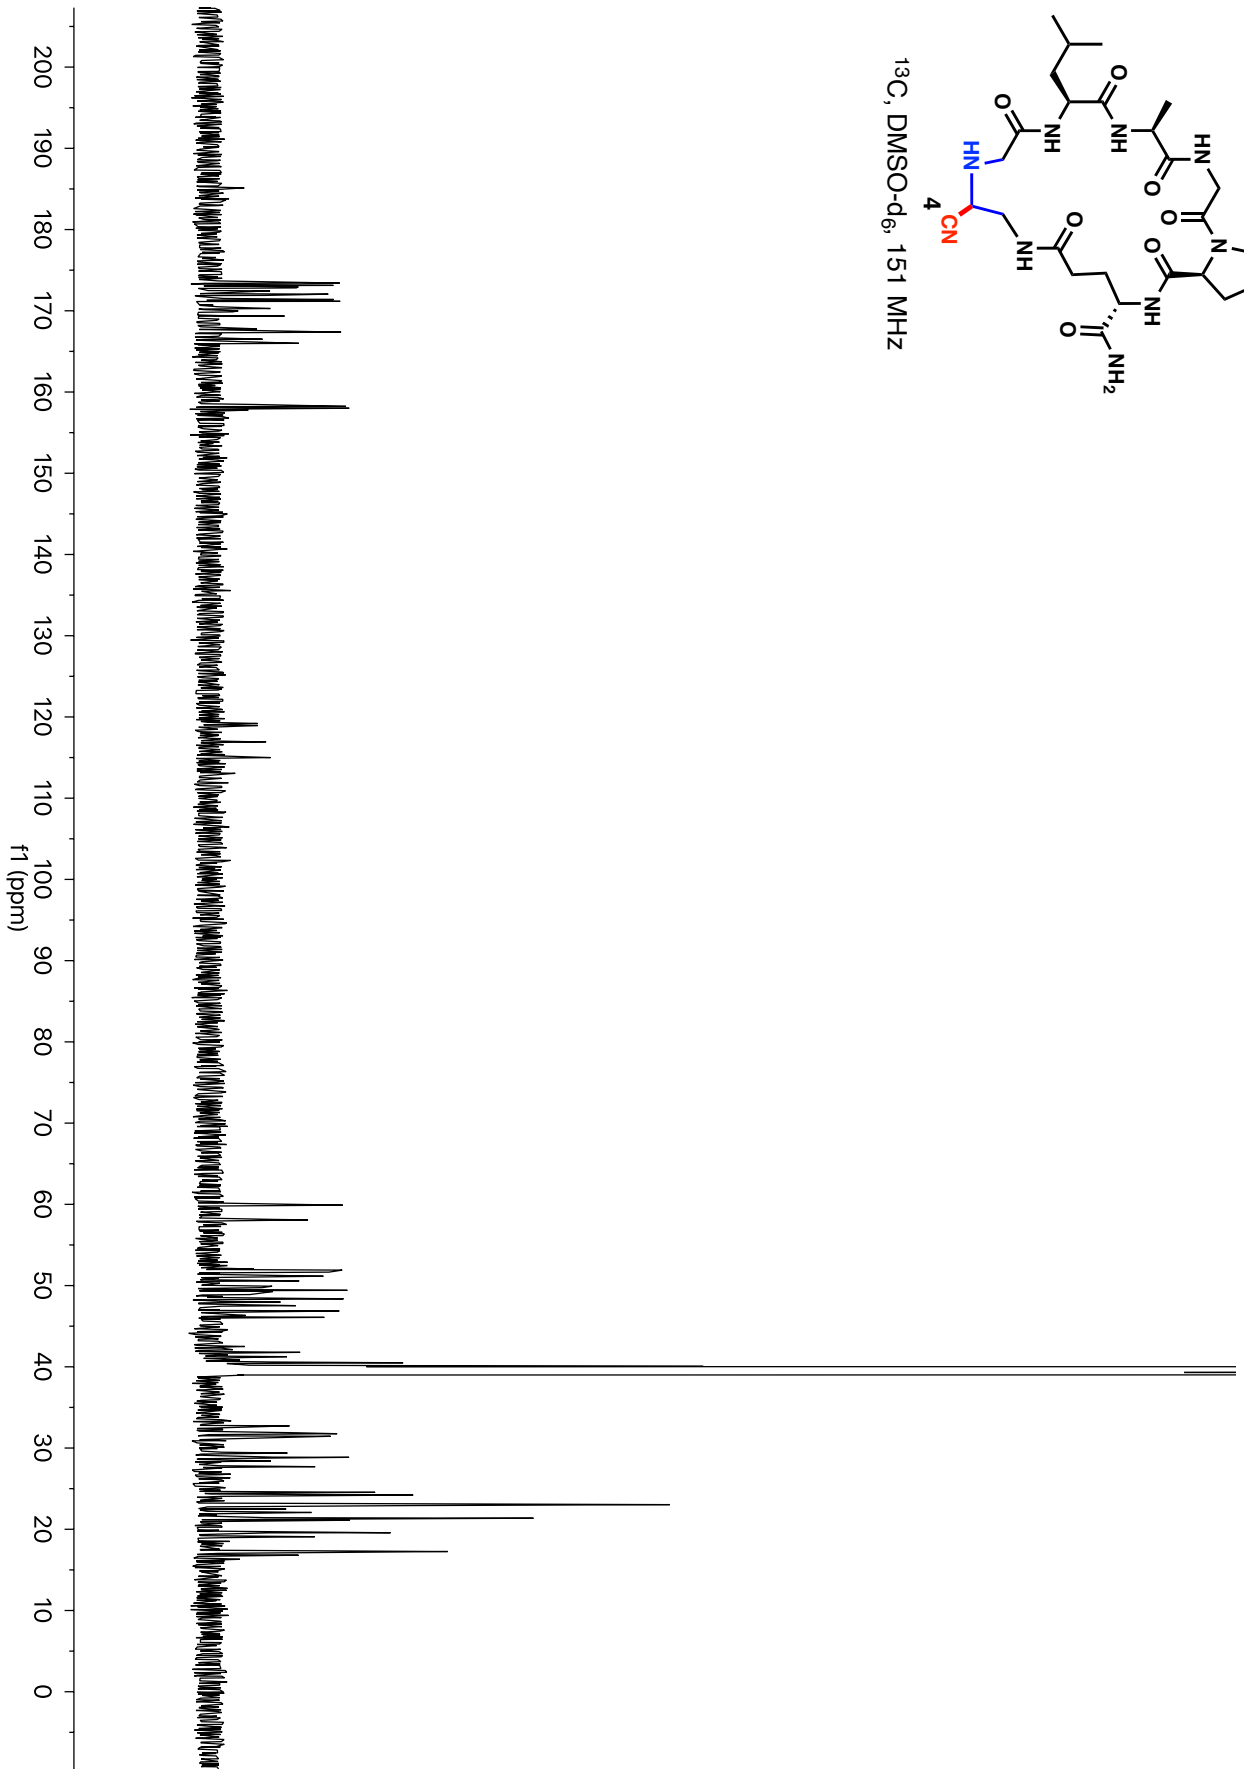

## Peptide 5

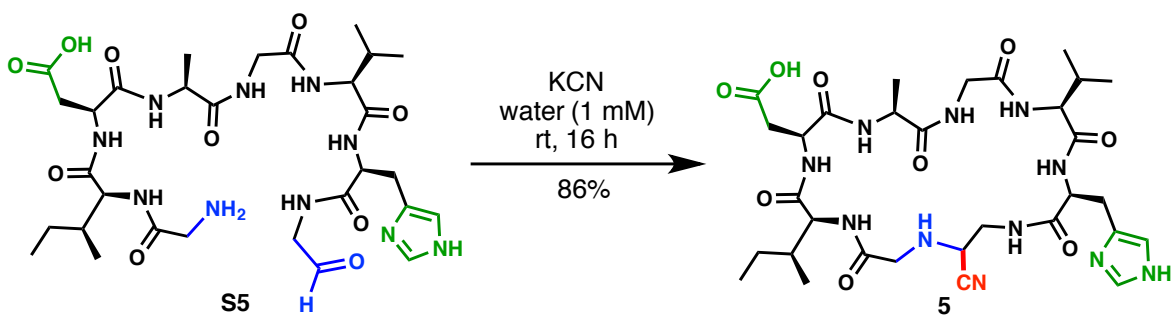

Peptide **5** was prepared according to general procedure 3 from linear amino aldehyde **S5** (5.6 mg, 7.90  $\mu\text{mol}$ ). At  $t = 16$  h, the reaction was purified by preparative reverse-phase HPLC (10% B for 5 min, then 10% to 45% B over 30 min) to afford peptide macrocycle **5** (4.9 mg, 86% yield) as a mixture of diastereomers and as a white solid following lyophilization.

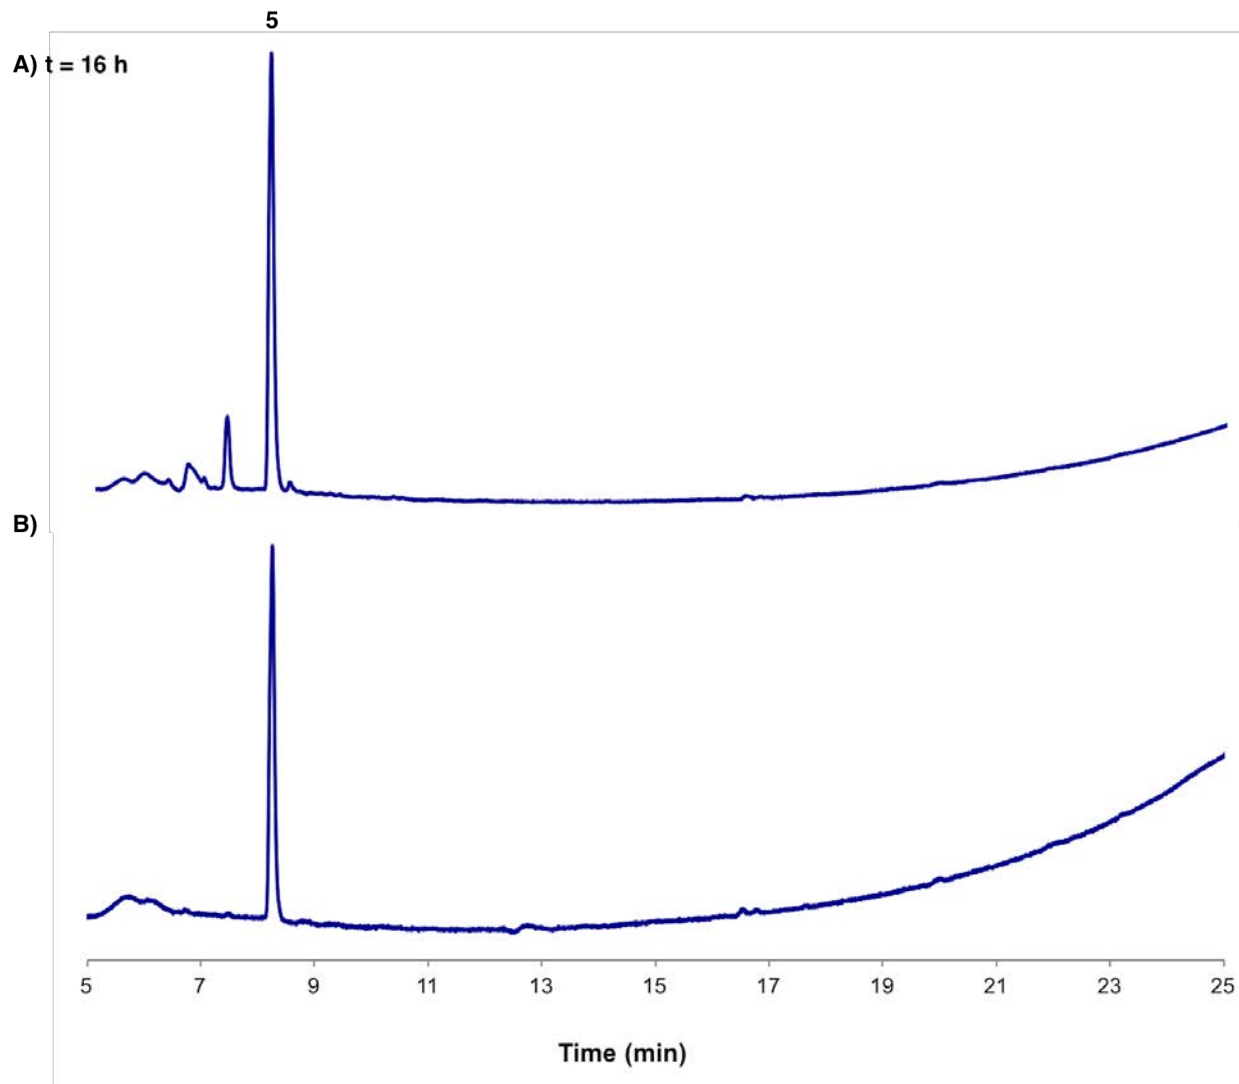

**A)** Crude analytical HPLC trace of the formation of **5** from amino aldehyde **S5** following Strecker macrocyclization (5 to 100% B over 25 min,  $\lambda = 210$  nm). **B)** Purified peptide **5** ( $R_t = 8.3$  min, 5 to 100% B over 25 min,  $\lambda = 210$  nm).

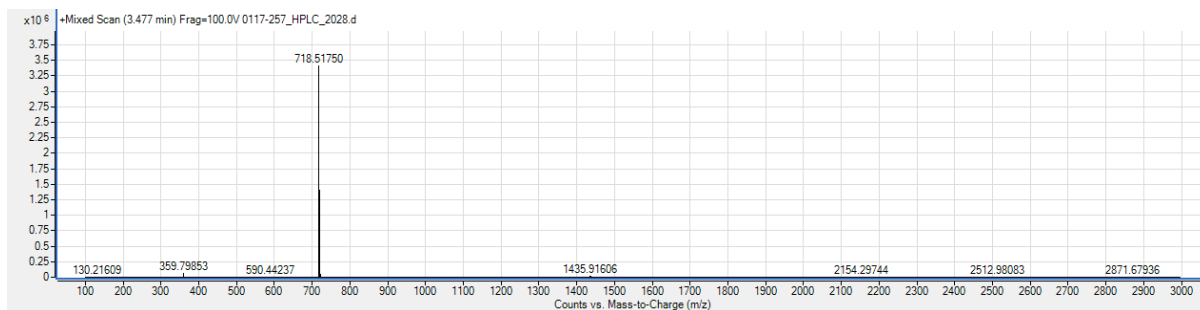

**LRMS (ESI-TOF):** calc'd for  $C_{26}H_{40}N_5O_5$   $[M+H]^+$  718.36; found 718.52.



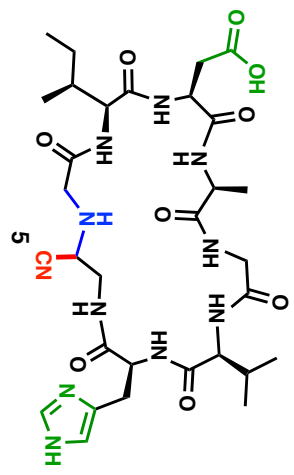

$^1\text{H}$ , DMSO- $d_6$ /D $_2$ O (20:1 v/v), 600 MHz

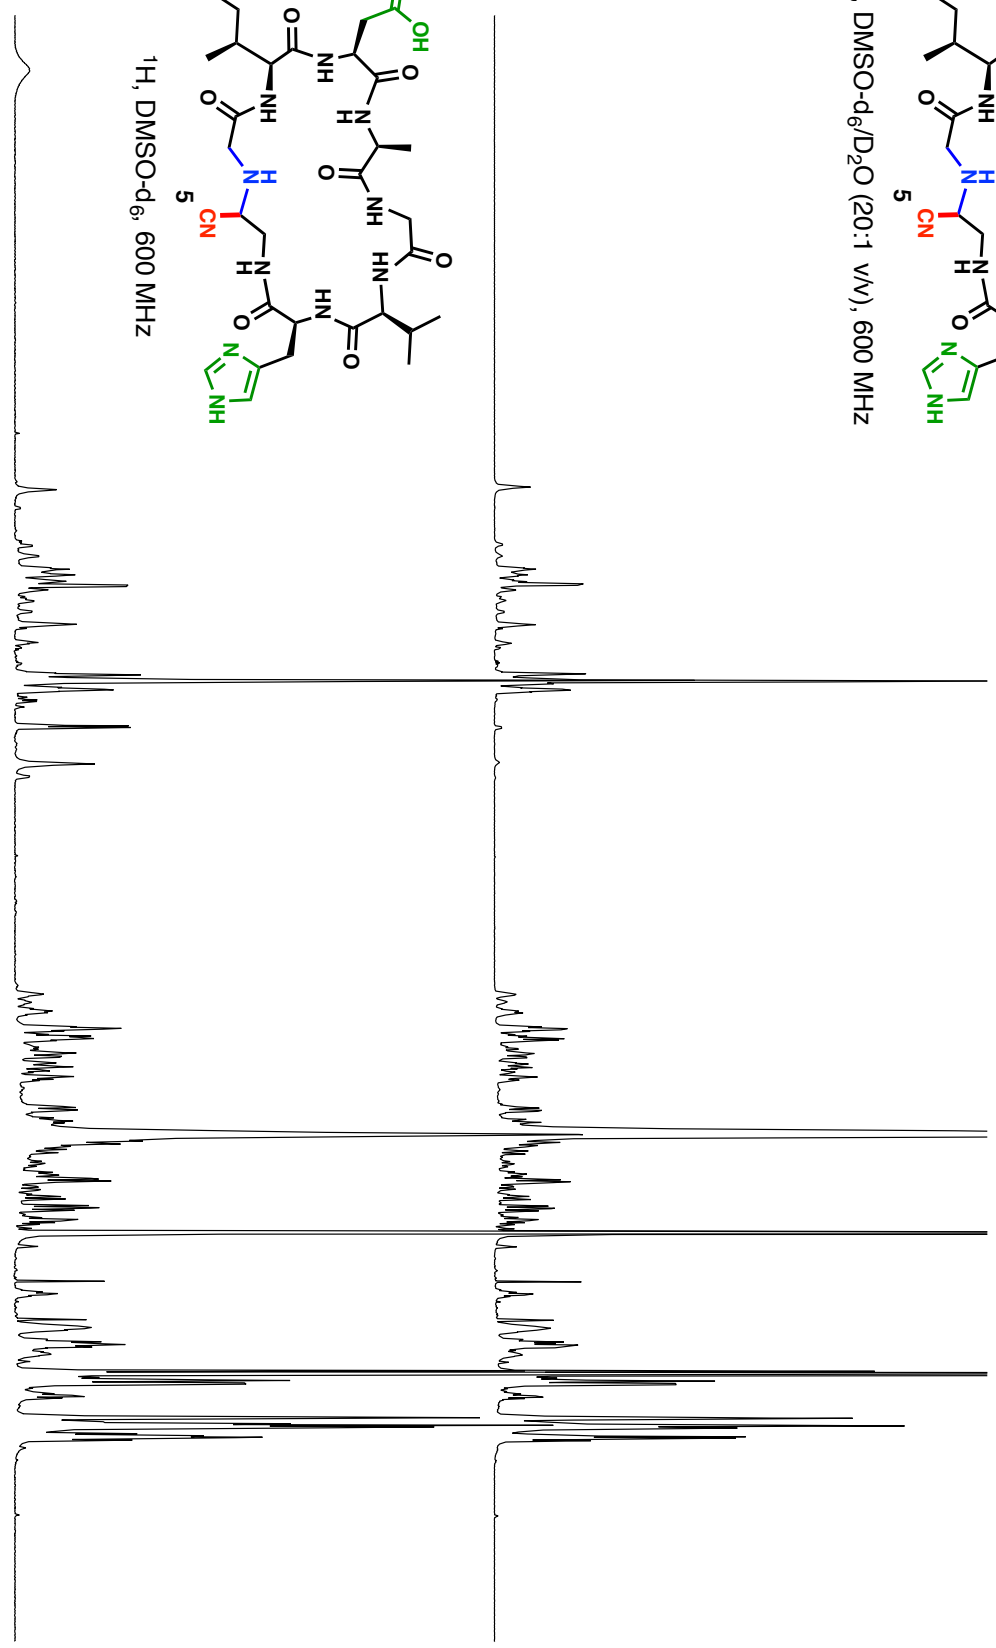

12.5 12.0 11.5 11.0 10.5 10.0 9.5 9.0 8.5 8.0 7.5 7.0 6.5 6.0 5.5 5.0 4.5 4.0 3.5 3.0 2.5 2.0 1.5 1.0 0.5 0.0 -0.5 -1.0

$\delta$  (ppm)

5  
COSY, DMSO-d<sub>6</sub>, 600 MHz

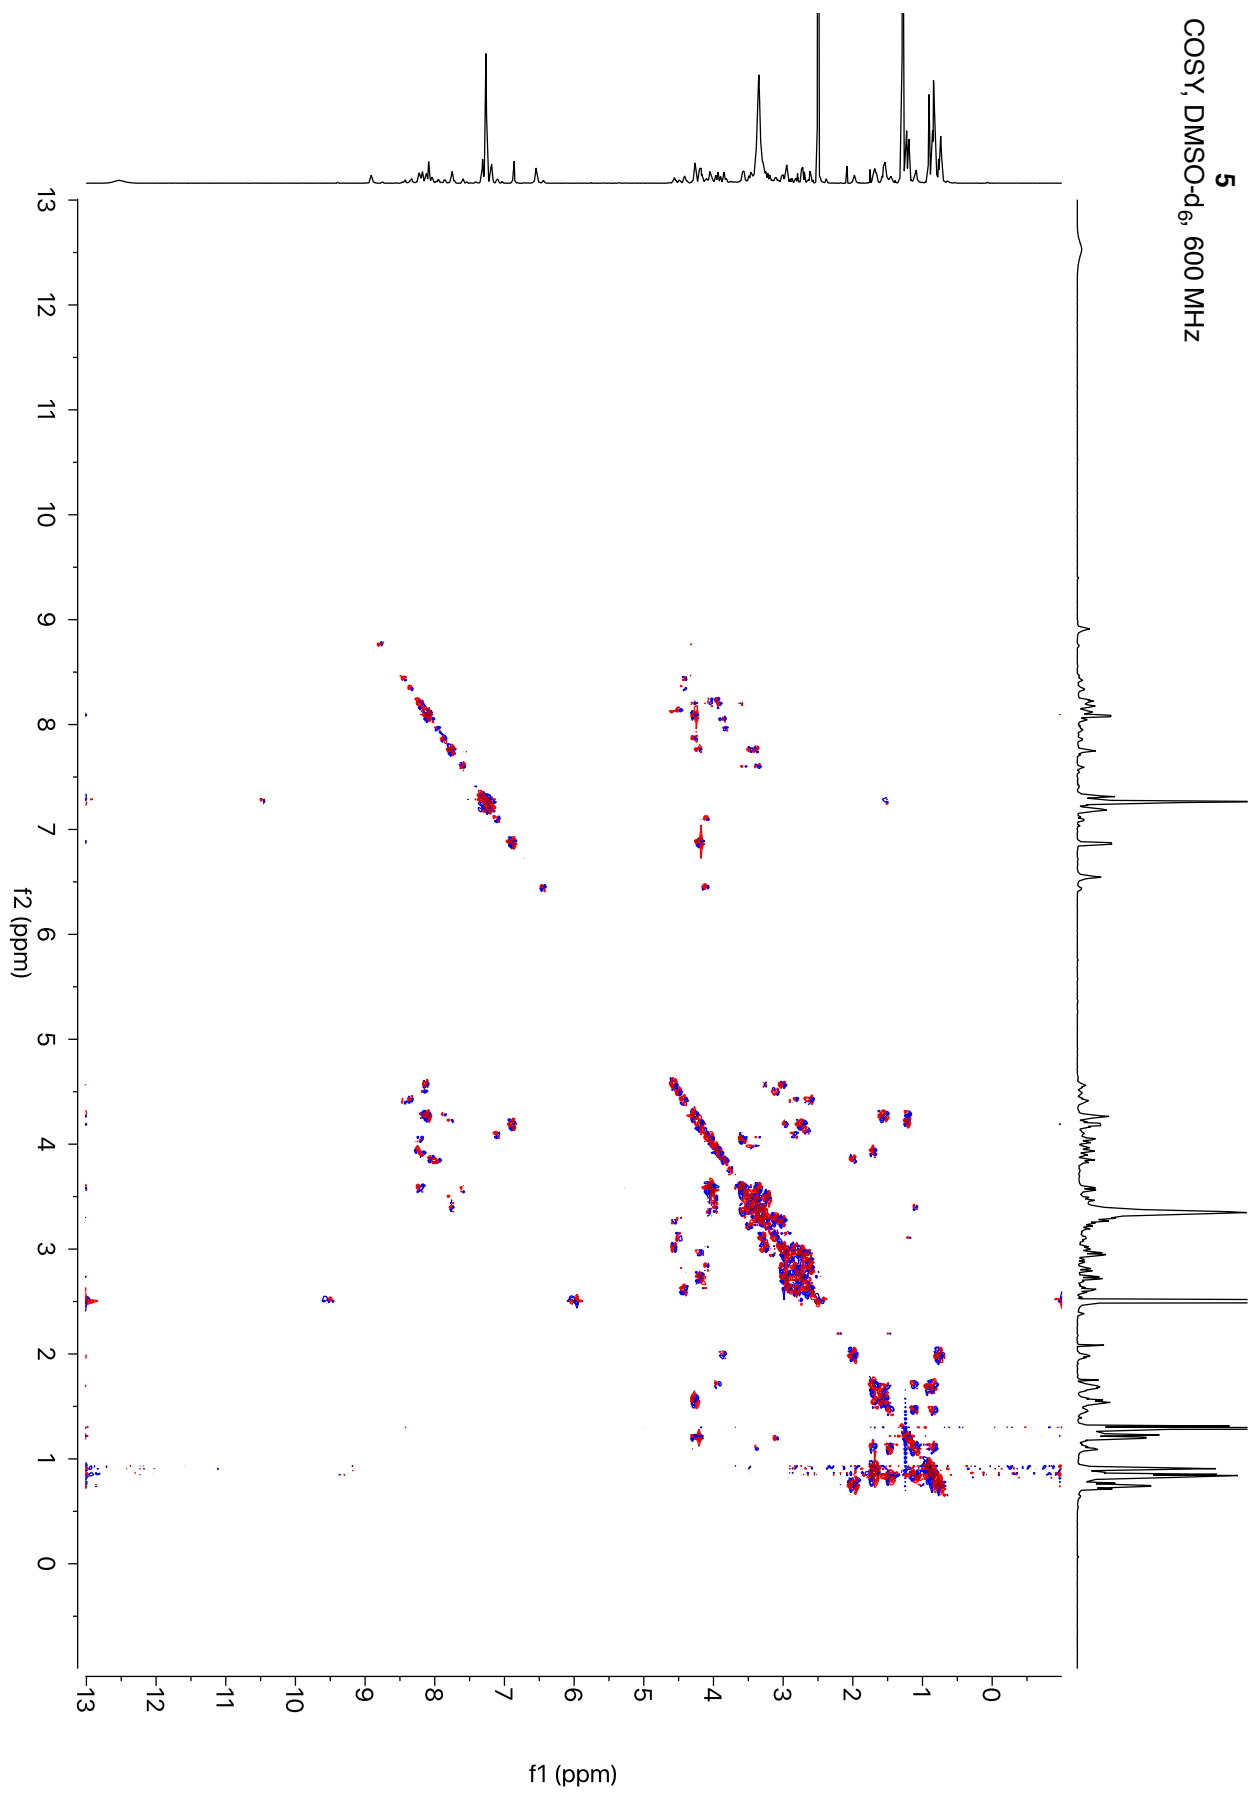

f1 (ppm)

S102

## Peptide 6

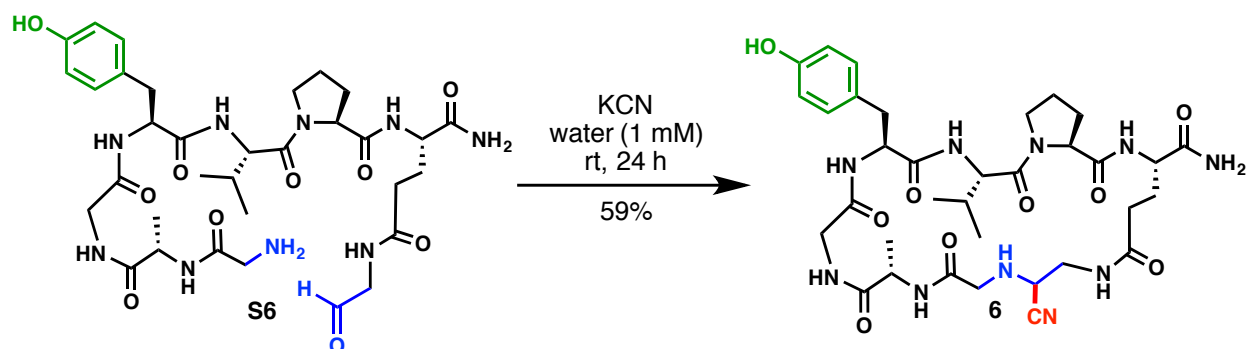

Peptide **6** was prepared according to general procedure 3 from linear amino aldehyde **S6** (5.0 mg, 6.8  $\mu\text{mol}$ ). At  $t = 24$  h, the reaction was purified by preparative reverse-phase HPLC (5% B for 5 min, 5% B to 15% B over 5 min, then 15% to 45% B over 30 min) to afford peptide macrocycle **6** (3.0 mg, 59% yield) as a mixture of diastereomers and as a white solid following lyophilization.

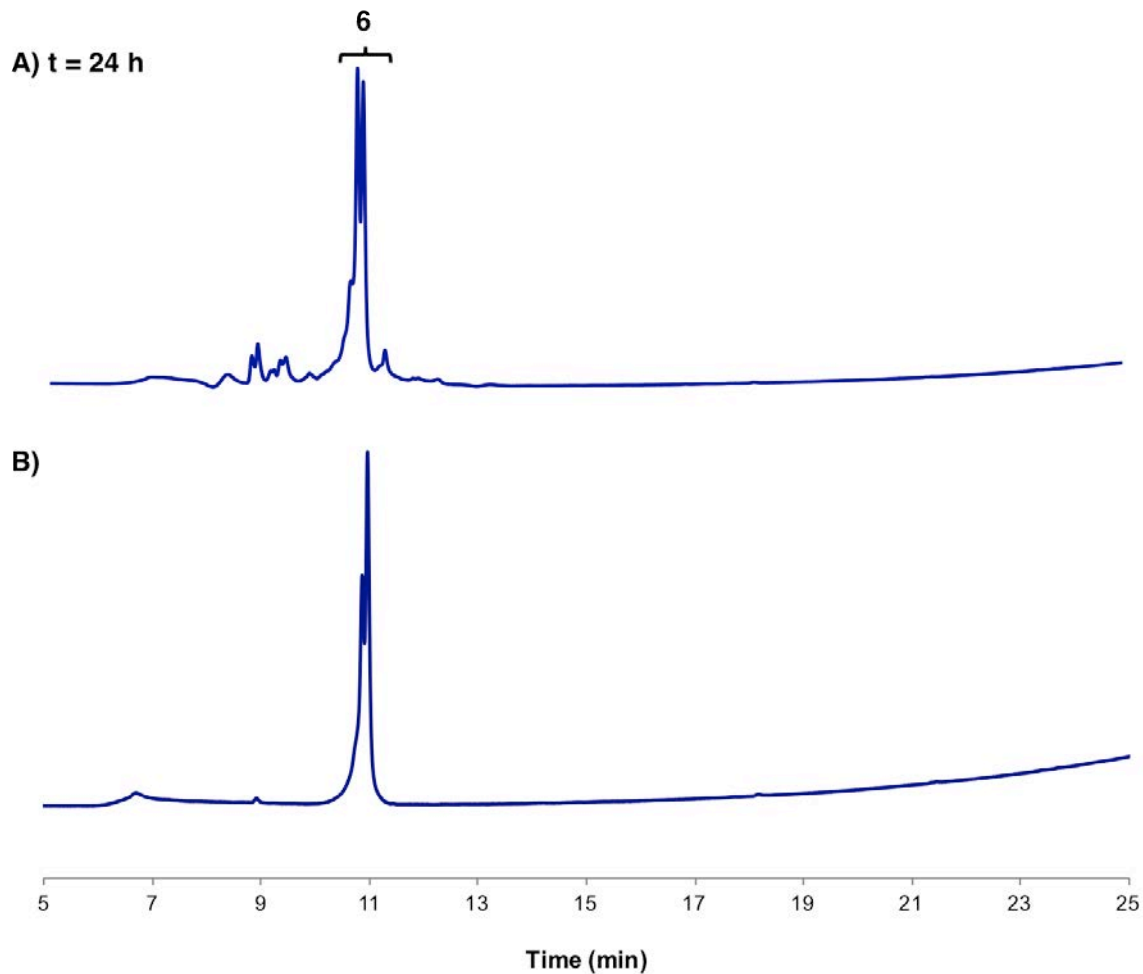

**A)** Crude analytical HPLC trace of the formation of **6** from amino aldehyde **S6** following Strecker macrocyclization (0 to 100% B over 25 min,  $\lambda = 230$  nm). **B)** Purified peptide **6** ( $R_t = 10.7, 10.8$  min, 0 to 100% B over 25 min,  $\lambda = 230$  nm).

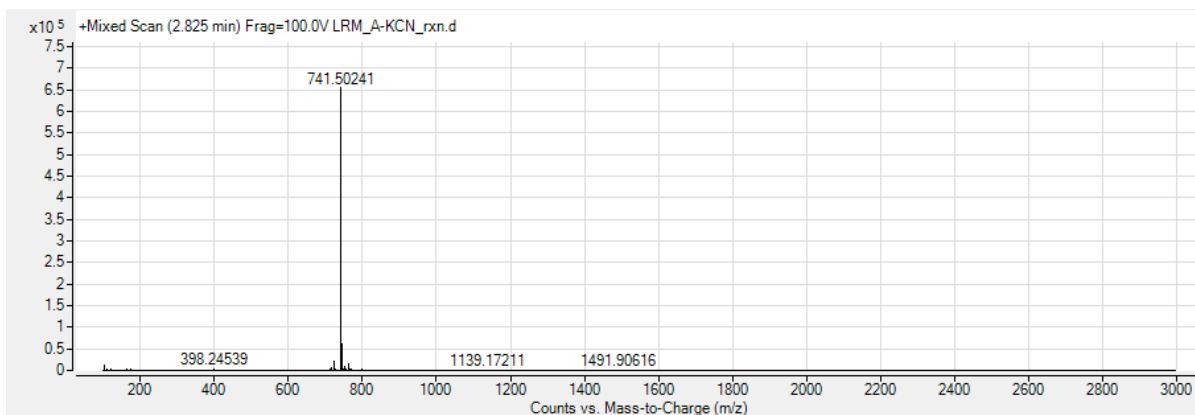

**LRMS (ESI-TOF):** calc'd for  $C_{34}H_{49}N_{10}O_9$   $[M+H]^+$  741.37; found 741.50.

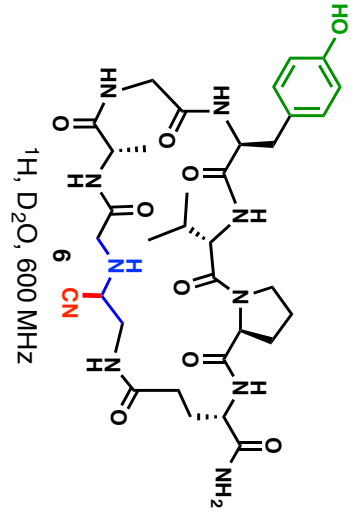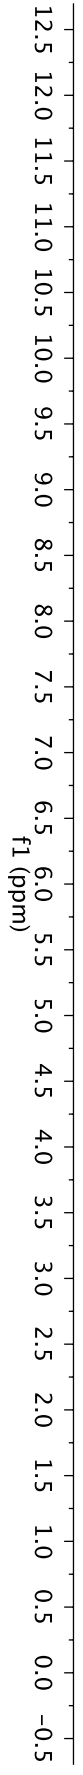

## Peptide 7

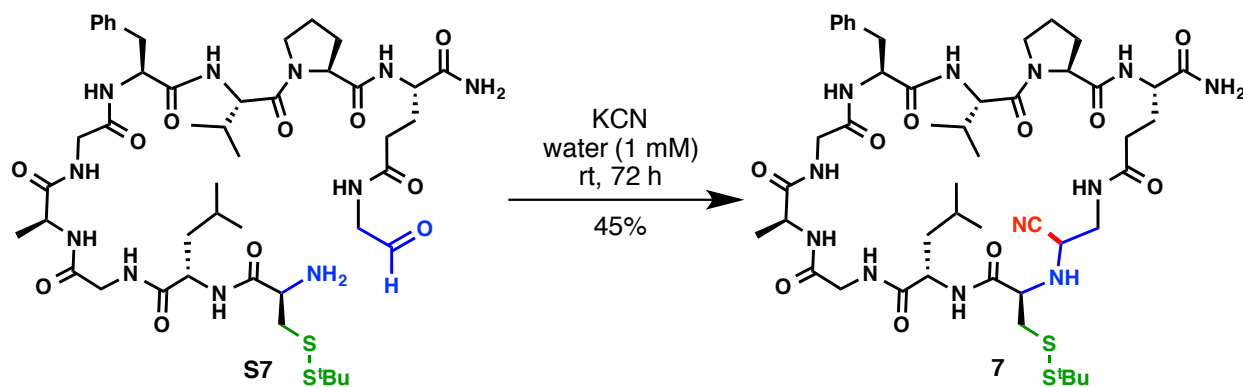

Peptide **7** was prepared according to general procedure 3 from linear amino aldehyde **S7** (3.6 mg, 3.5  $\mu\text{mol}$ ). At  $t = 48$  h, an additional portion of KCN (1.2 equiv.) was added to the reaction mixture. At  $t = 72$  h, the reaction was purified by preparative reverse-phase HPLC (25% B for 5 min, then 25% to 70% B over 35 min) to afford peptide macrocycle **7** (1.6 mg, 45% yield) as a mixture of diastereomers (3:1 *d.r.*) and as a white solid following lyophilization.

*Note: Linear cyanohydrin (1.2 mg) was also isolated from the crude reaction mixture. As the Strecker macrocyclization is an equilibrium process with cyanohydrin formation more readily reversible than  $\alpha$ -aminonitrile formation, higher yields of the Strecker adduct may be obtained with prolonged reaction times.*

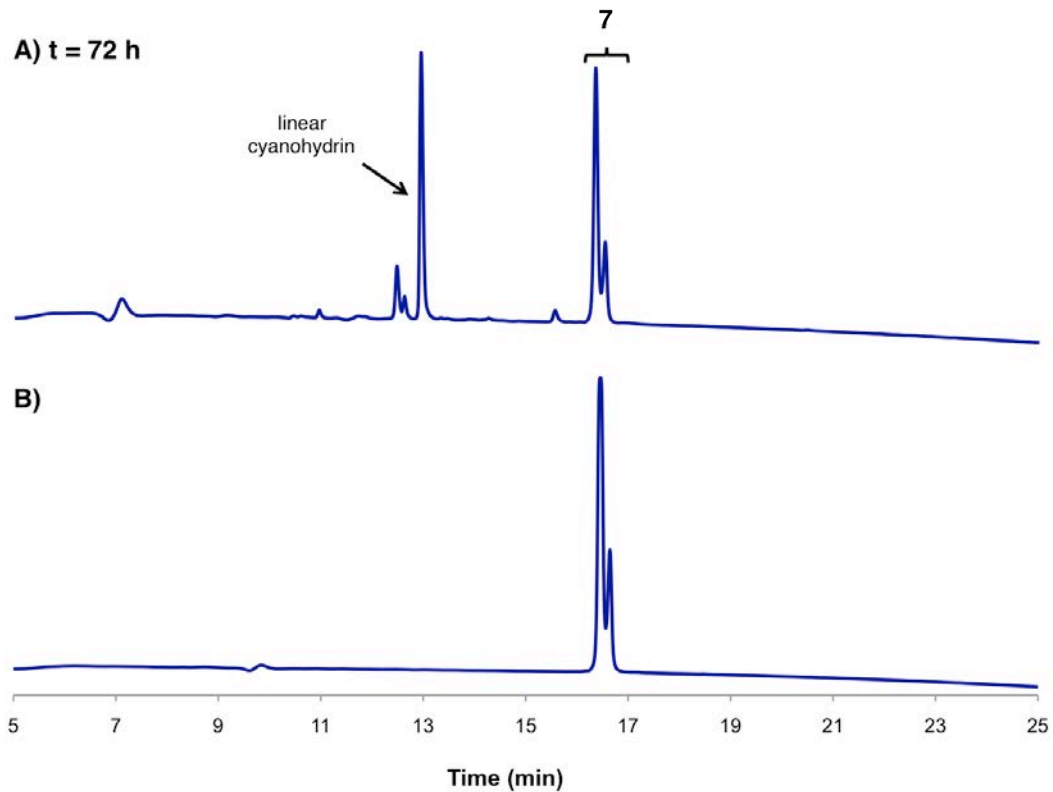

**A)** Crude analytical HPLC trace of the formation of **7** from amino aldehyde **S7** following Strecker macrocyclization (5 to 100% B over 25 min,  $\lambda = 210$  nm). **B)** Purified peptide **7** ( $R_t = 16.5, 16.6$  min, 5 to 100% B over 25 min,  $\lambda = 210$  nm).

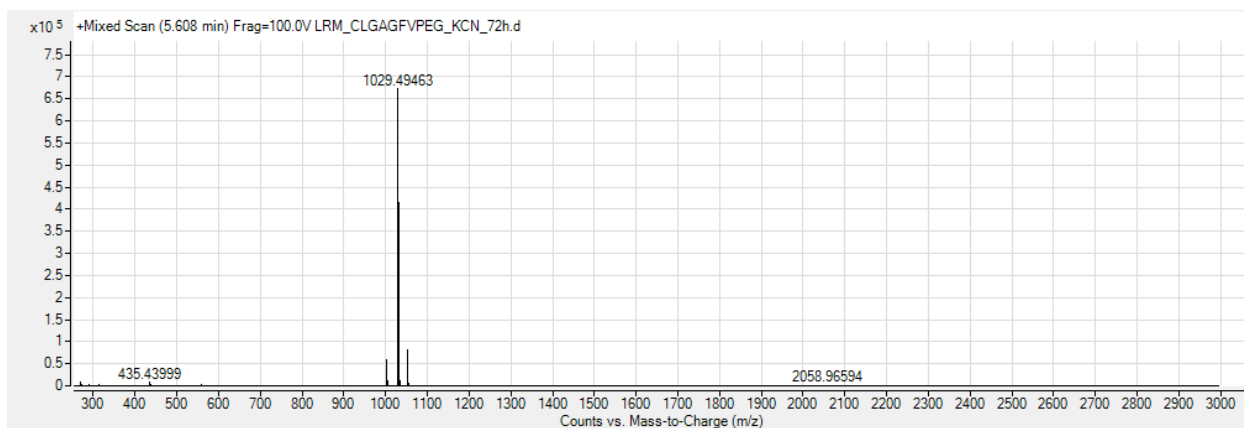

**LRMS (ESI-TOF):** calc'd for  $C_{47}H_{73}N_{12}O_{10}S_2$   $[M+H]^+$  1029.50; found 1029.49.

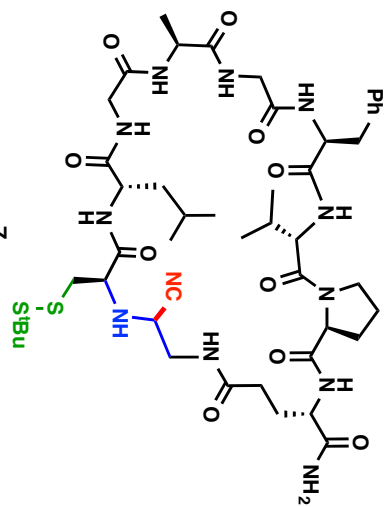

7  
<sup>1</sup>H, D<sub>2</sub>O/MeOD (4:1 v/v), 600 MHz

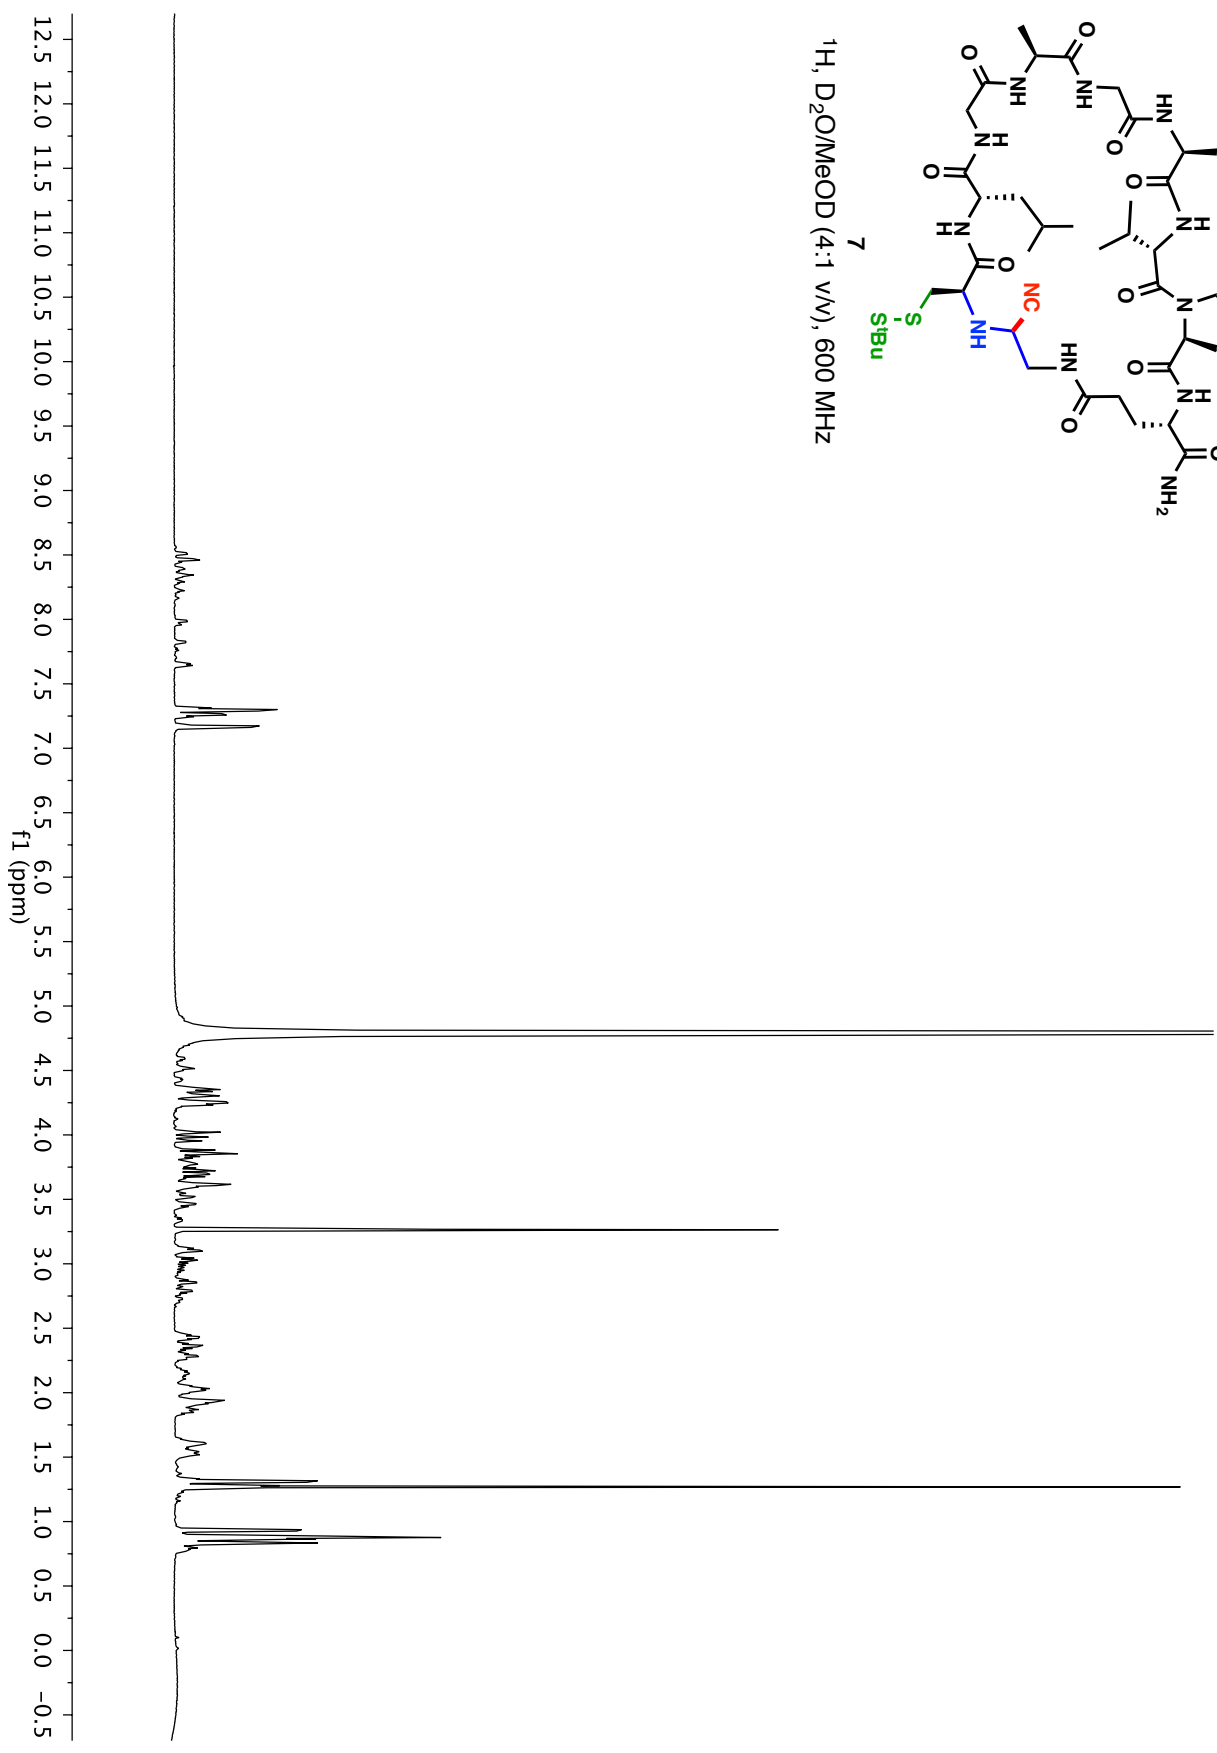



7  
COSY, D<sub>2</sub>O/MeOD (4:1 v/v), 600 MHz

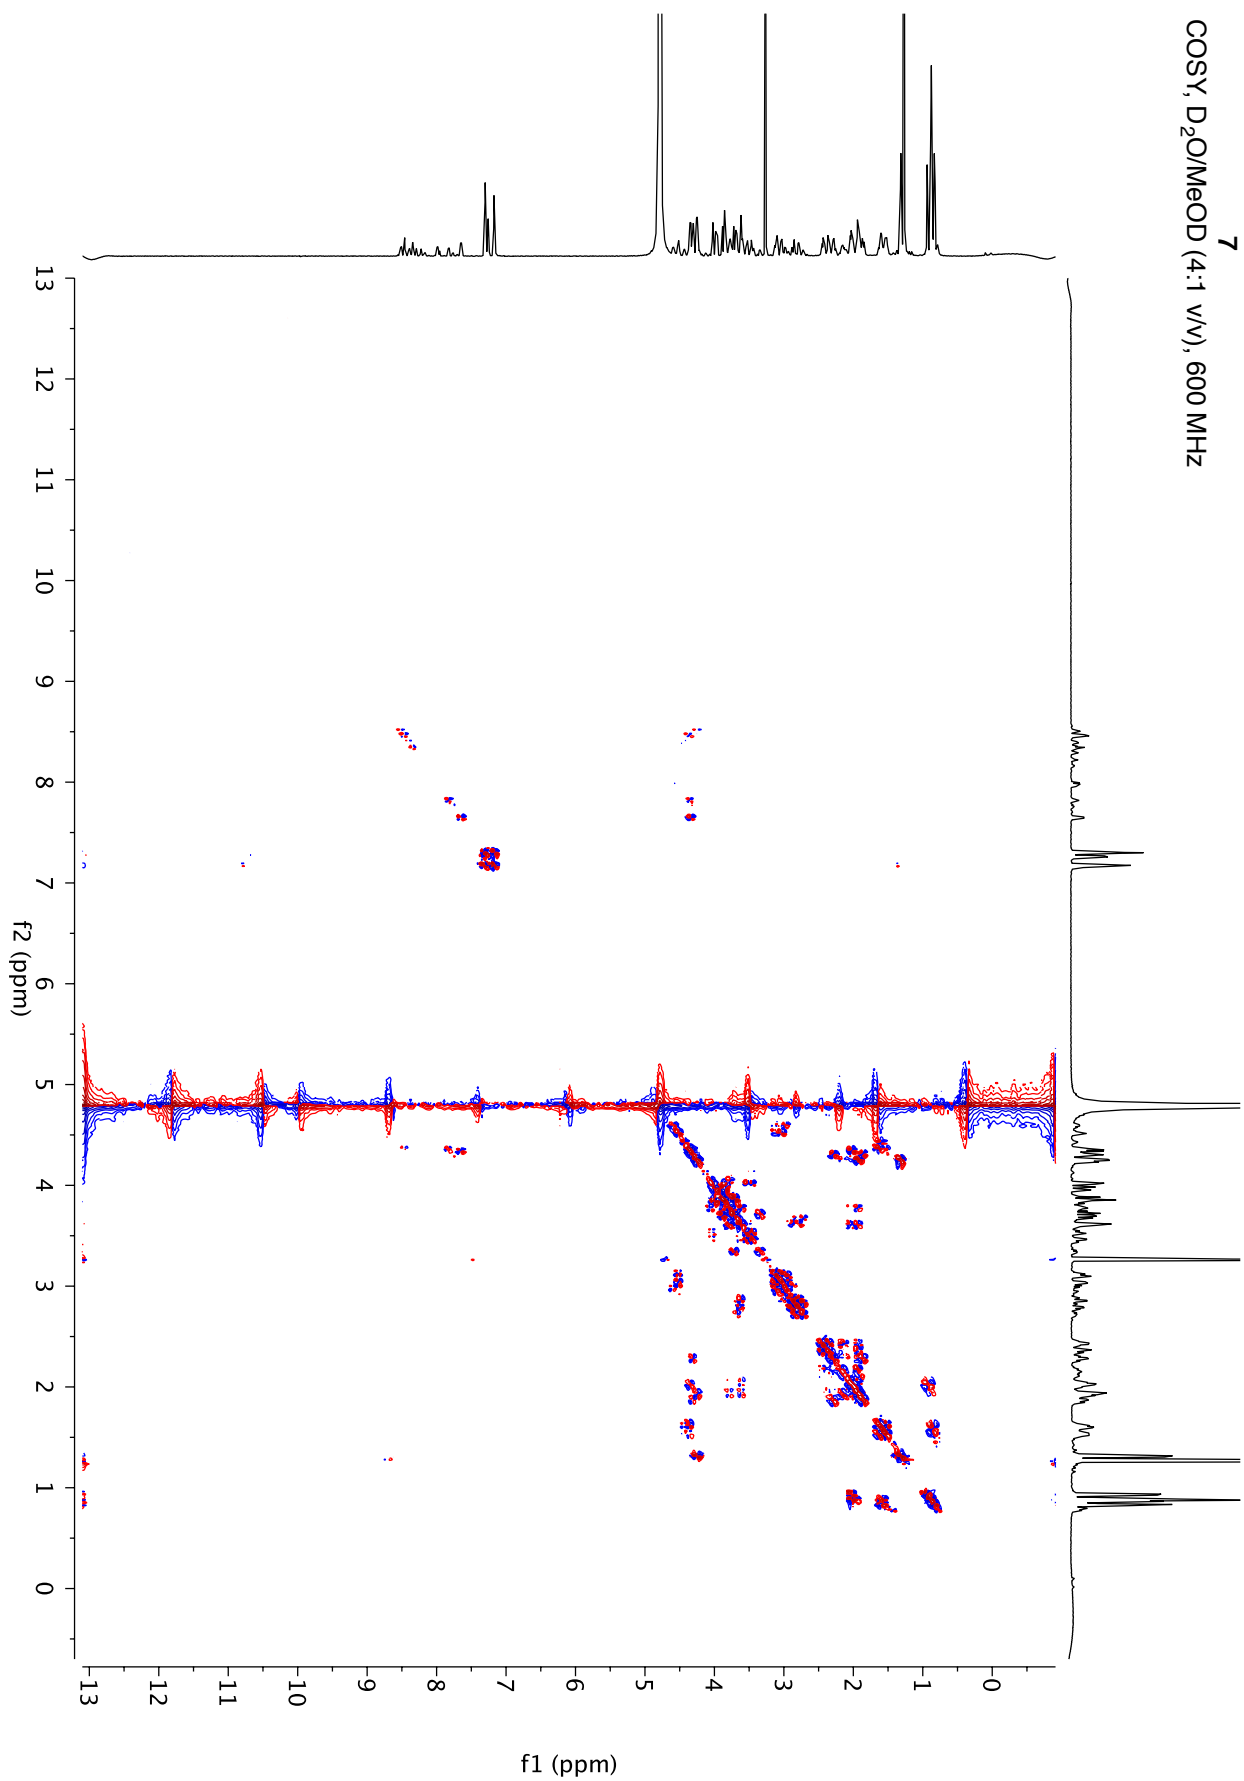

## Peptide 8

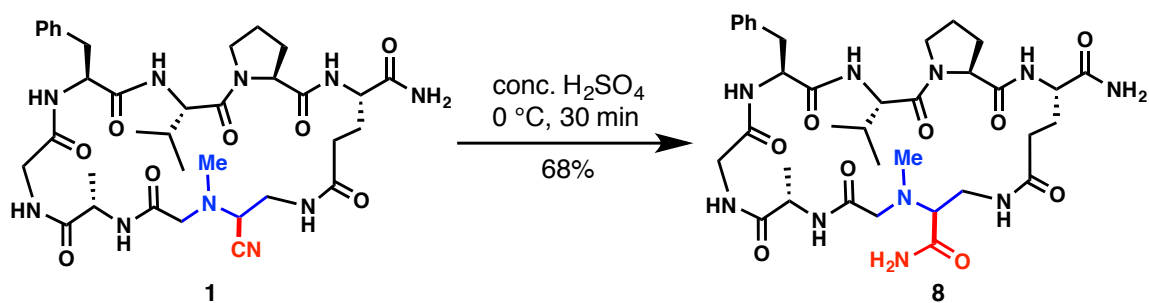

Peptide **8** was prepared from macrocycle **1** (4.0 mg, 5.4  $\mu\text{mol}$ ) by treatment with ice-cold conc.  $\text{H}_2\text{SO}_4$  (1.25 mL). The reaction was stirred at  $0\text{ }^\circ\text{C}$  for 30 min at which point LC-MS analysis indicated complete consumption of the starting peptide. The reaction mixture was kept at  $0\text{ }^\circ\text{C}$  and slowly diluted with 10 mL of water before purification by preparative reverse-phase HPLC (15% B for 5 min, then 15% to 50% B over 25 min) to afford peptide macrocycle **8** (2.8 mg, 68% yield) as a mixture of diastereomers and as a white solid following lyophilization.

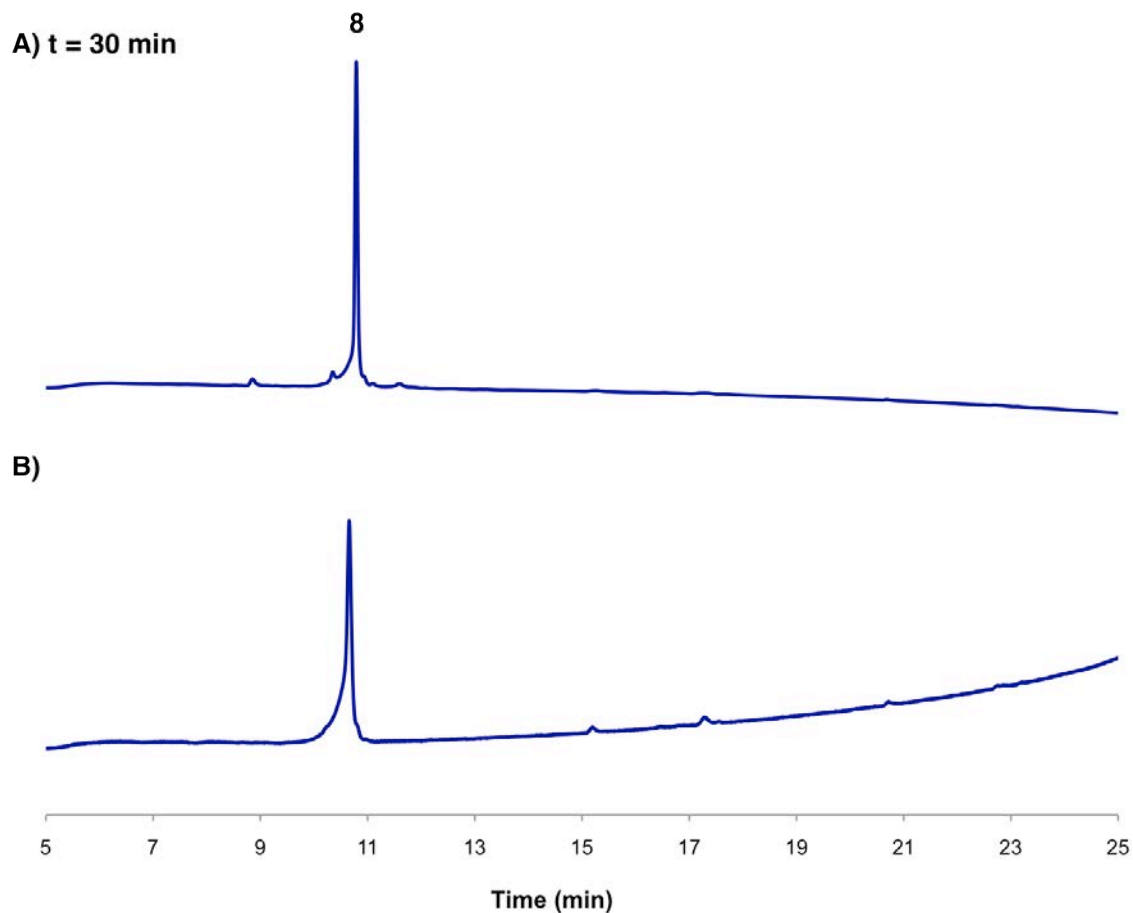

**A)** Crude analytical HPLC trace of the formation of **8** from macrocycle **1** following acidic hydrolysis (5 to 100% B over 25 min,  $\lambda = 210$  nm). **B)** Purified peptide **8** ( $R_t = 10.7$  min, 5 to 100% B over 25 min,  $\lambda = 230$  nm).

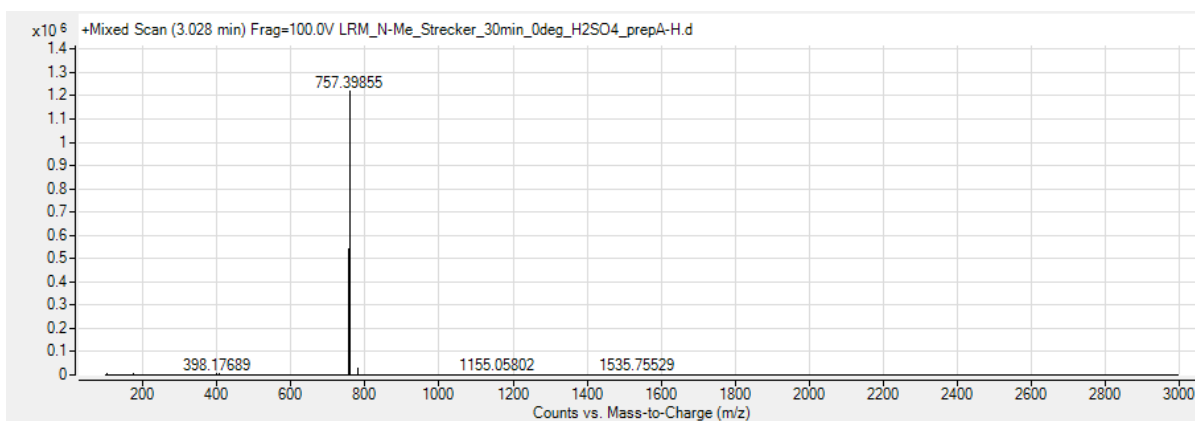

**LRMS (ESI-TOF):** calc'd for  $C_{35}H_{53}N_{10}O_9$   $[M+H]^+$  757.40; found 757.40.

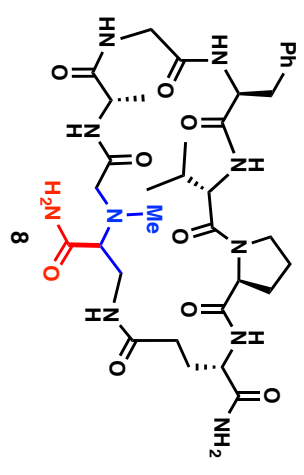

<sup>1</sup>H, DMSO-d<sub>6</sub>/D<sub>2</sub>O (20:1 v/v), 600 MHz

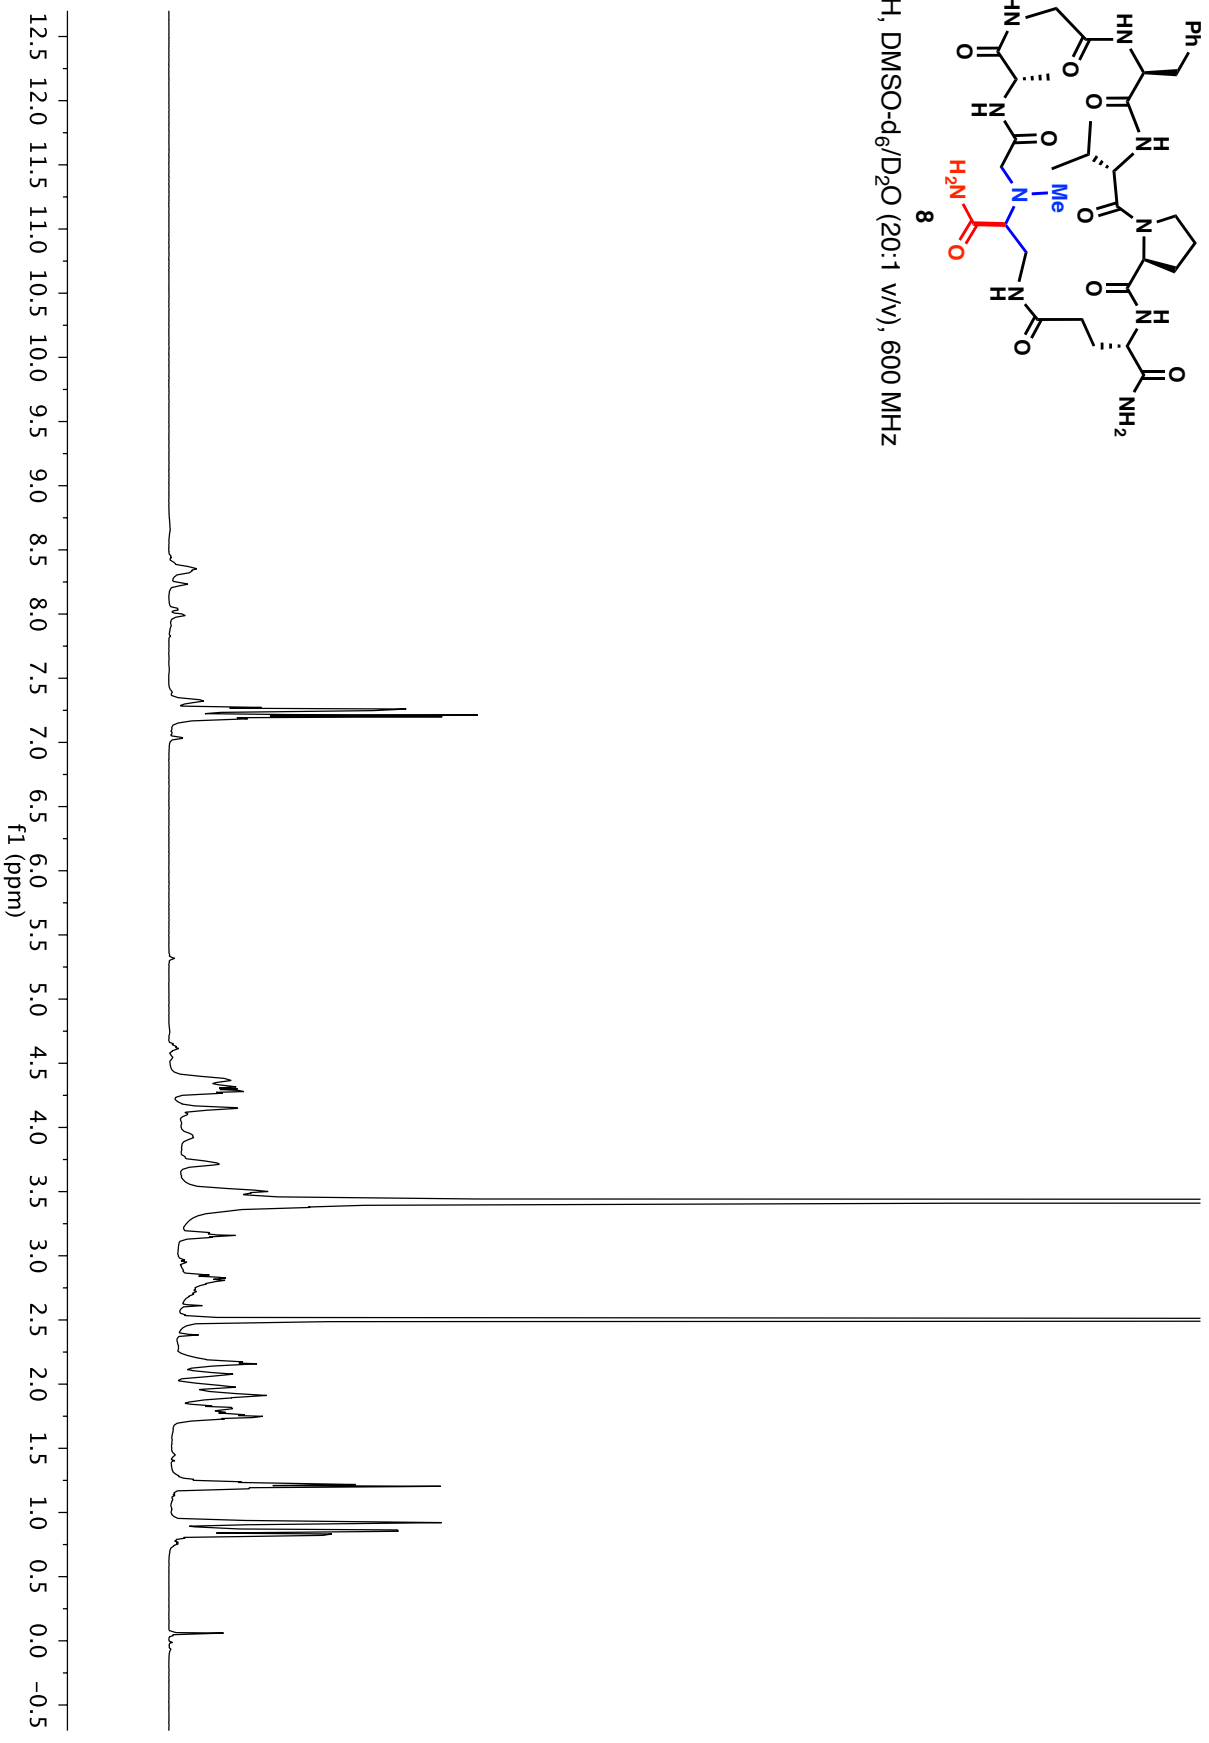

**8**  
COSY, DMSO-d<sub>6</sub>, 600 MHz

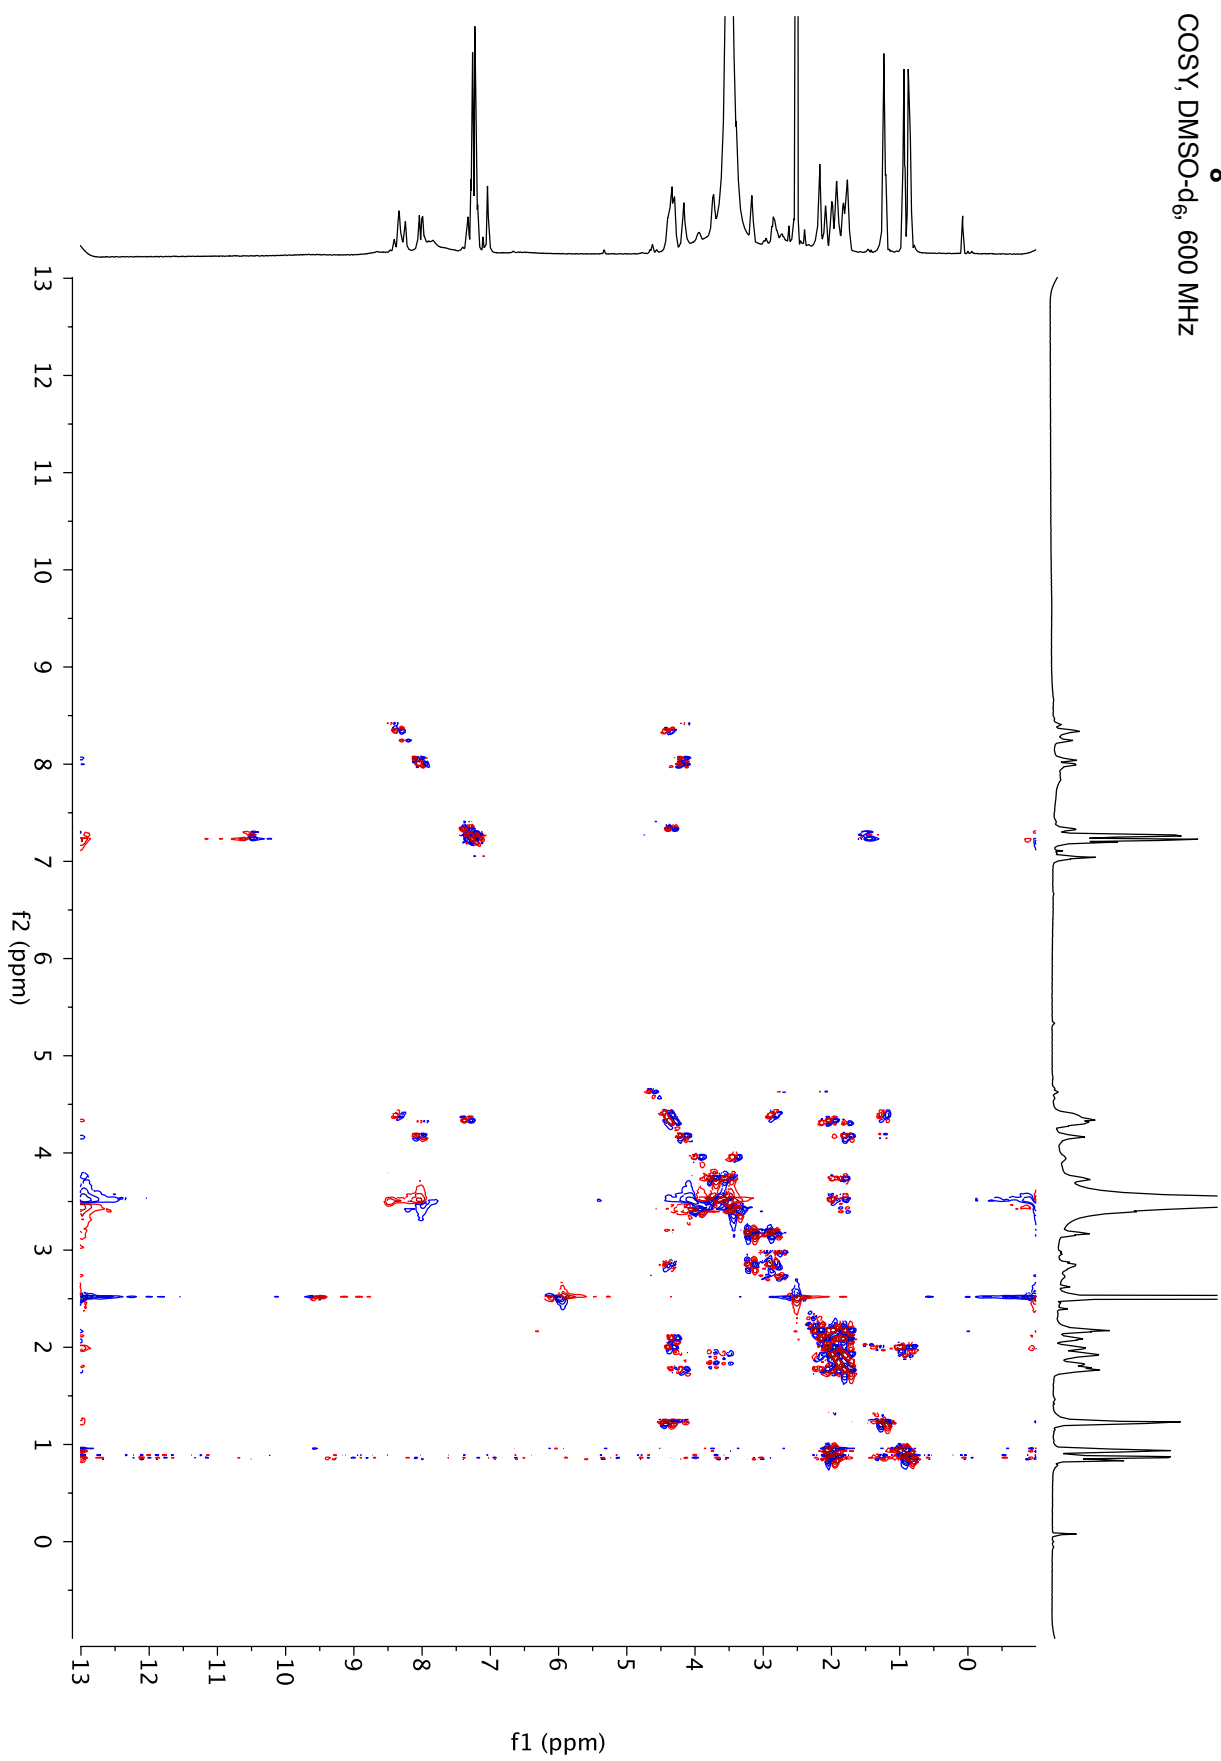

## Characterization Data for Reductive Amination

### Peptide 9

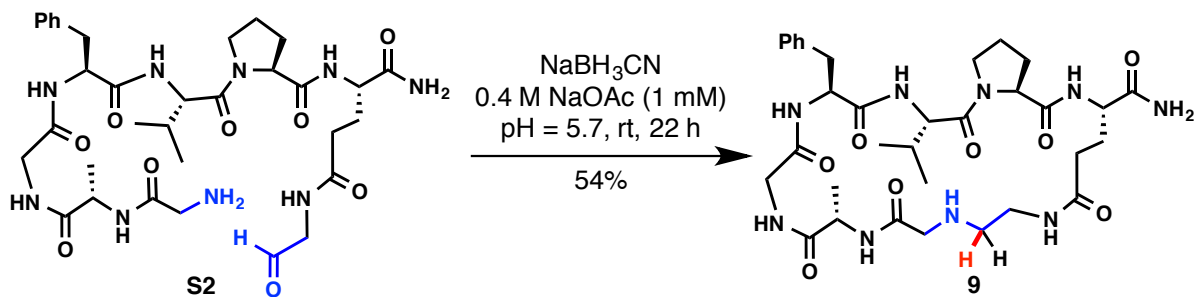

Peptide **9** was prepared according to general procedure 4 from linear amino aldehyde **S2** (7.0 mg, 9.8  $\mu\text{mol}$ ). At  $t = 22$  h, the reaction was purified by preparative reverse-phase HPLC (15% B for 5 min, then 15% to 50% B over 30 min) to afford peptide macrocycle **9** (3.7 mg, 54% yield) as a white solid following lyophilization.

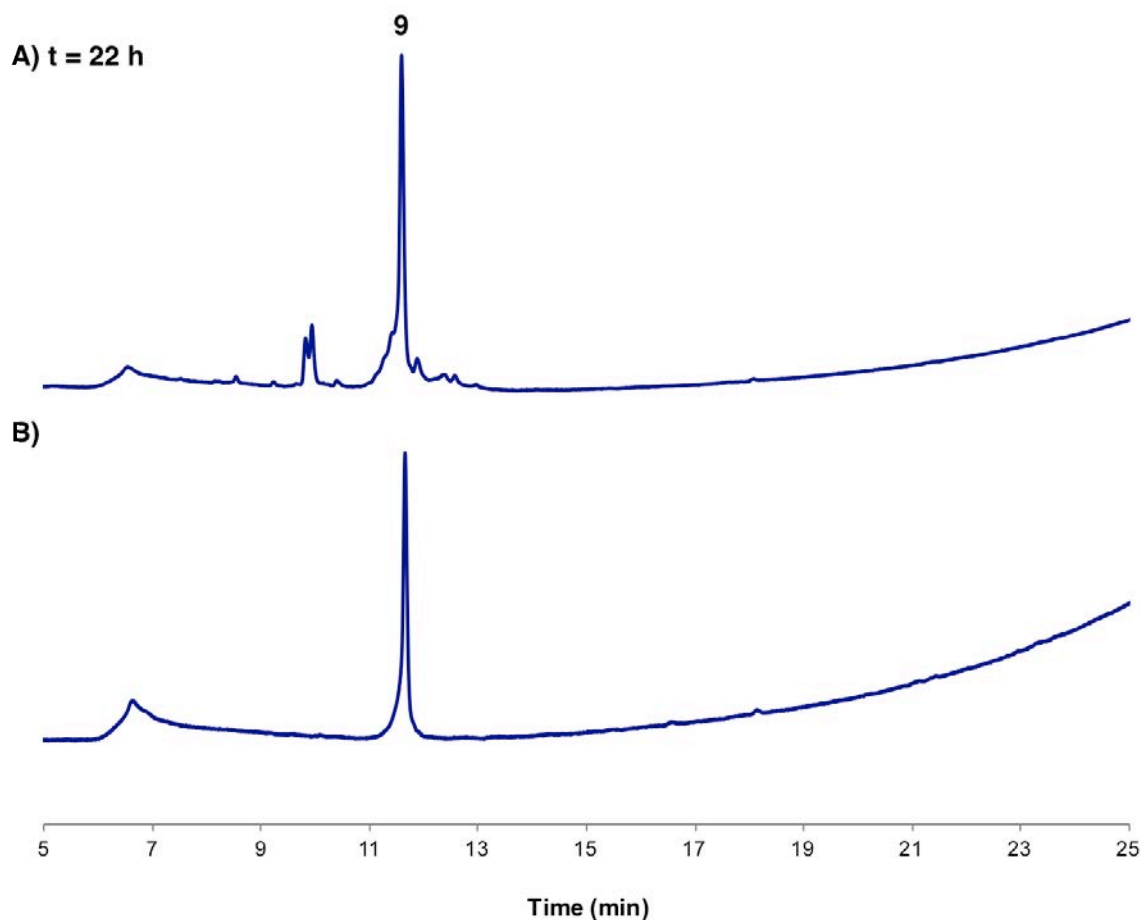

**A)** Crude analytical HPLC trace of the formation of **9** from amino aldehyde **S2** following reductive amination (0 to 100% B over 25 min,  $\lambda = 230$  nm). **B)** Purified peptide **9** ( $R_t = 11.7$  min, 0 to 100% B over 25 min,  $\lambda = 230$  nm).

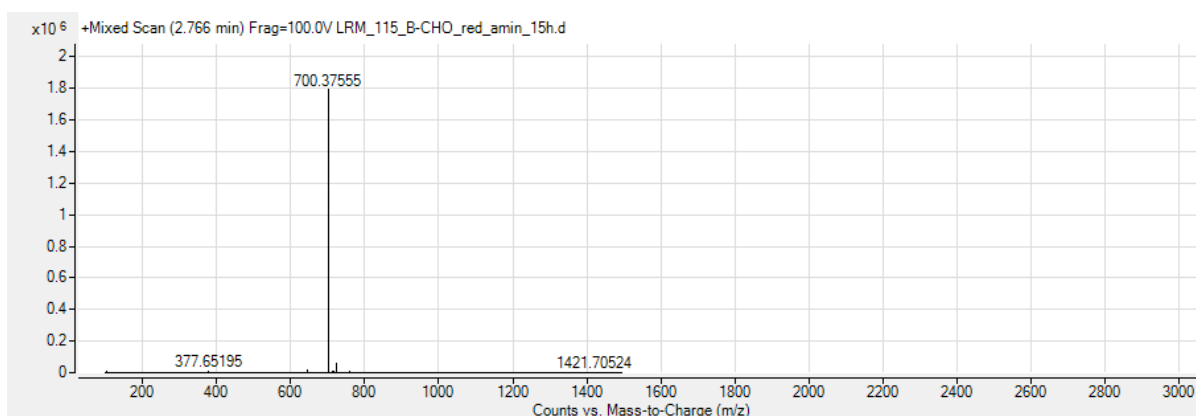

**LRMS (ESI-TOF):** calc'd for  $C_{33}H_{50}N_9O_8$   $[M+H]^+$  700.38; found 700.38.

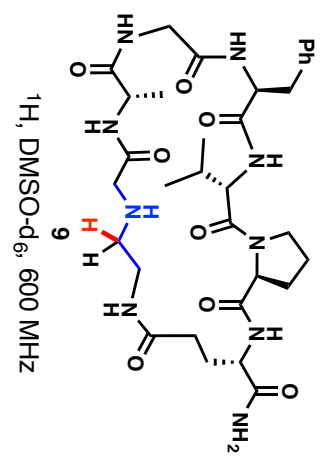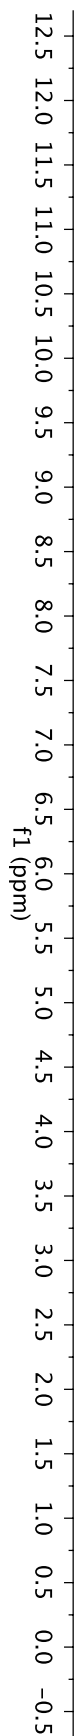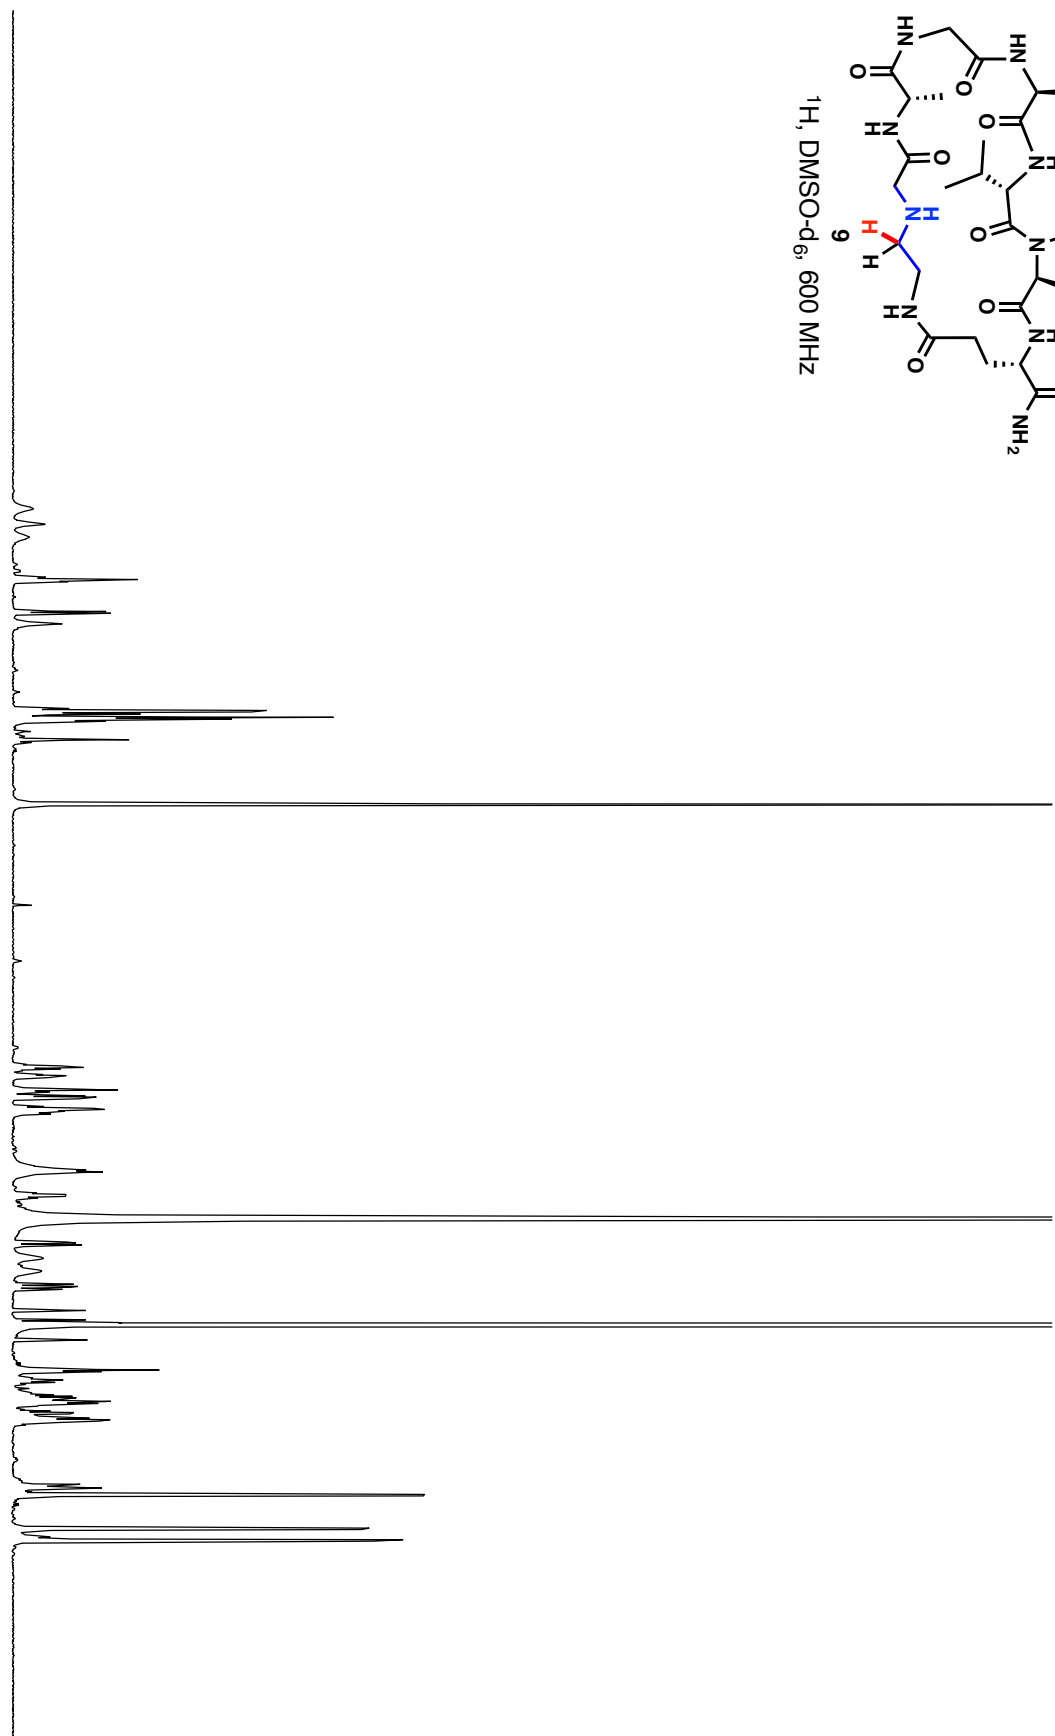



**9**  
COSY, DMSO-d<sub>6</sub>, 600 MHz

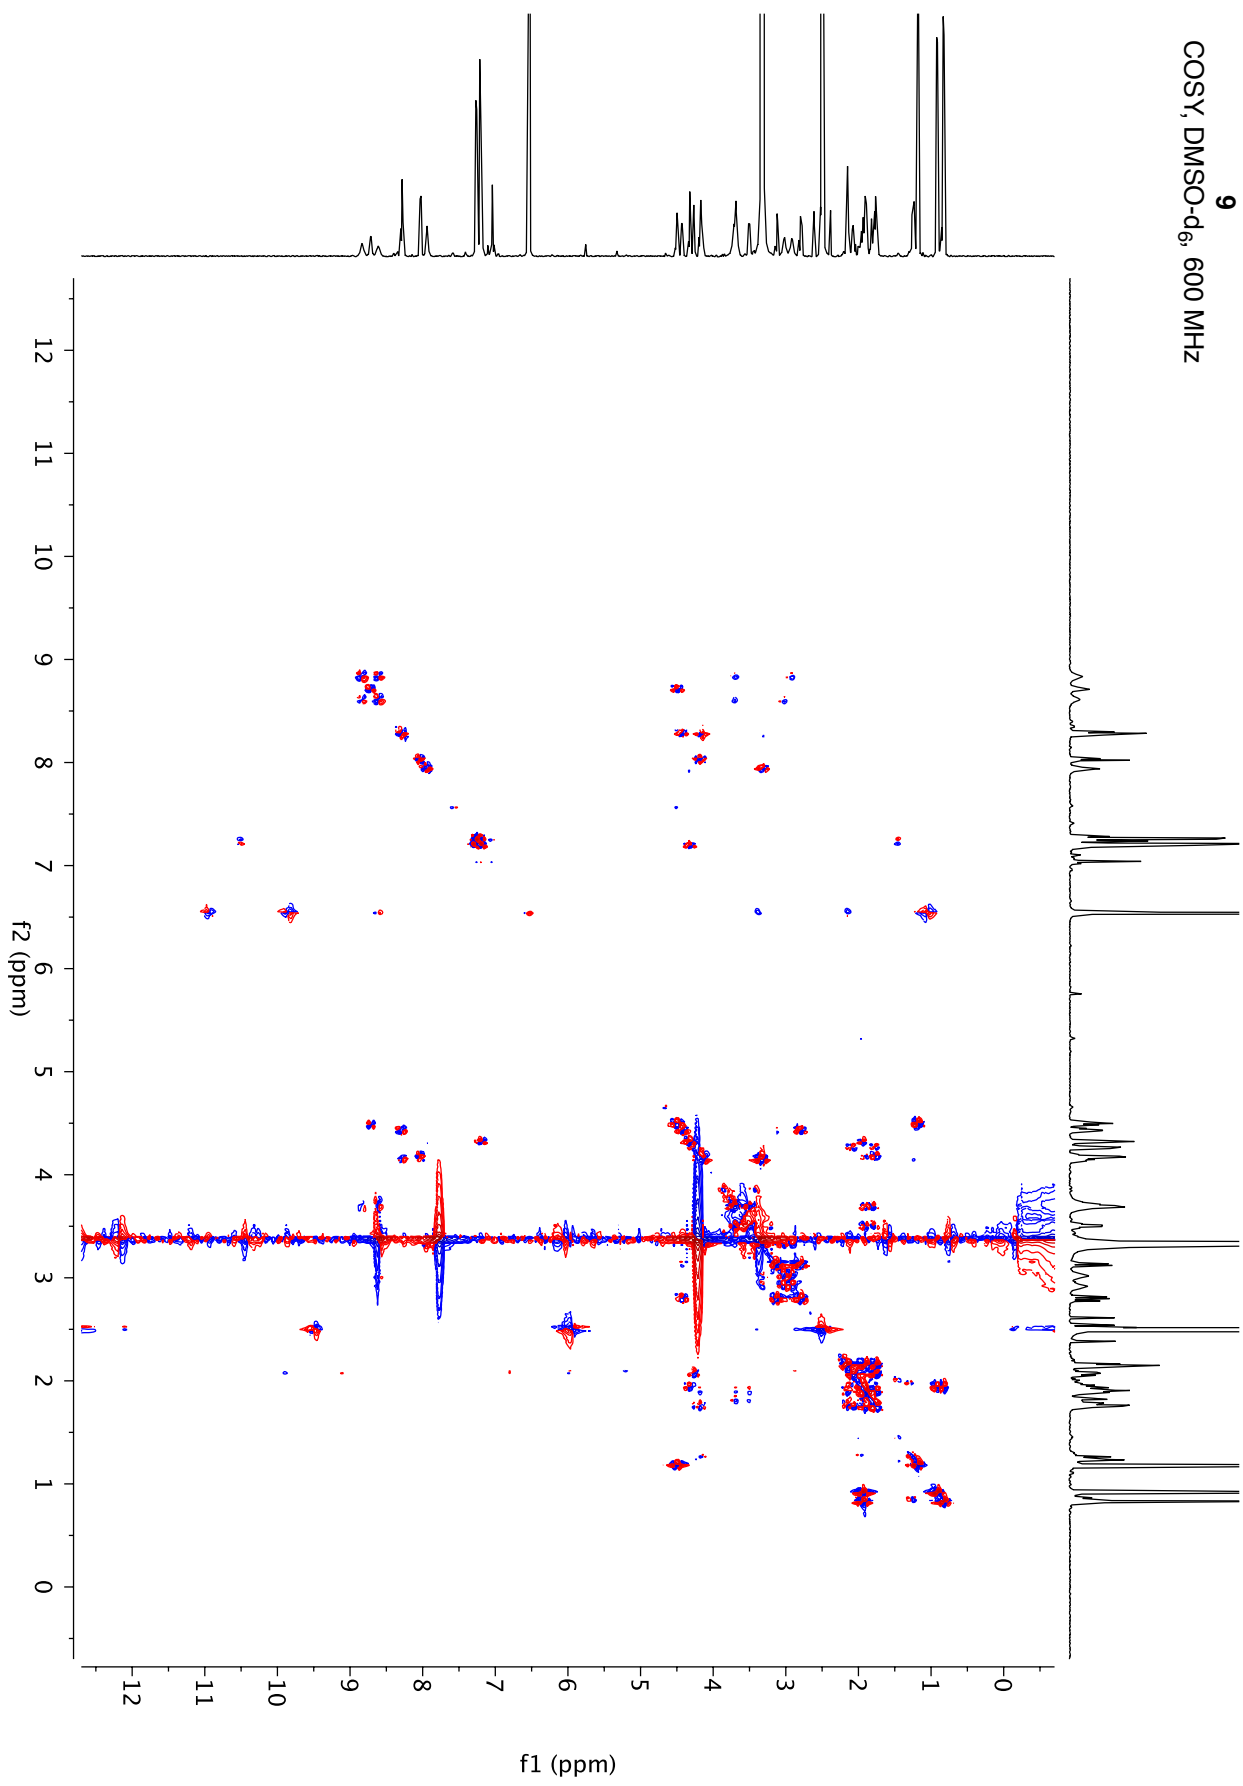

## Peptide 10

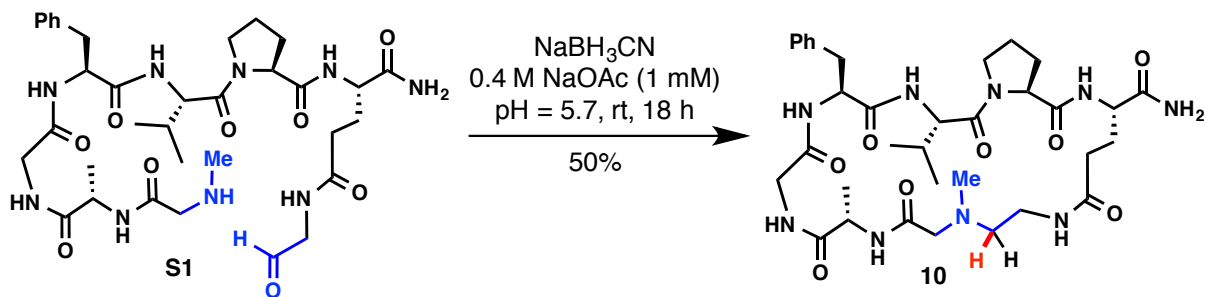

Peptide **10** was prepared according to general procedure 4 from linear amino aldehyde **S1** (4.3 mg, 5.9  $\mu\text{mol}$ ). At  $t = 18$  h, the reaction was purified by preparative reverse-phase HPLC (15% B for 5 min, then 15% to 50% B over 35 min) to afford peptide macrocycle **10** (2.1 mg, 50% yield) as a white solid following lyophilization.

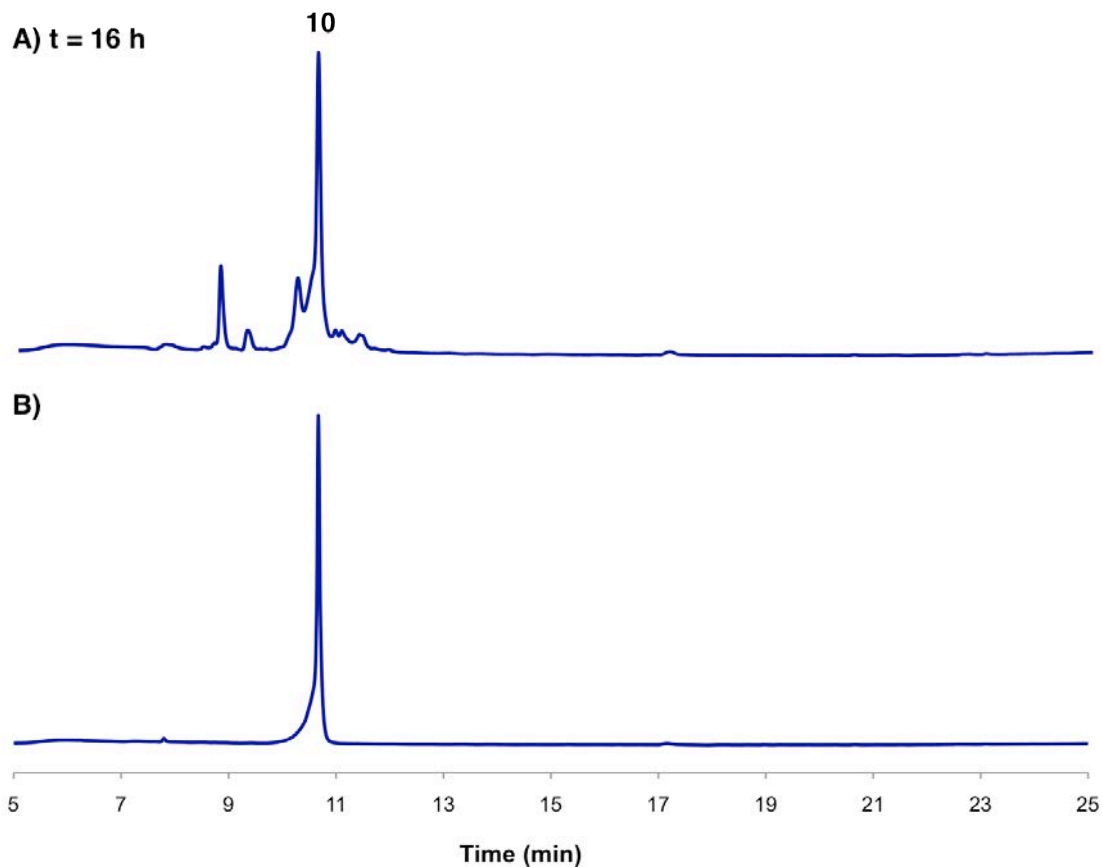

**A)** Crude analytical HPLC trace of the formation of **10** from amino aldehyde **S1** following reductive amination (5 to 100% B over 25 min,  $\lambda = 220$  nm). **B)** Purified peptide **10** ( $R_t = 10.7$  min, 5 to 100% B over 25 min,  $\lambda = 220$  nm).

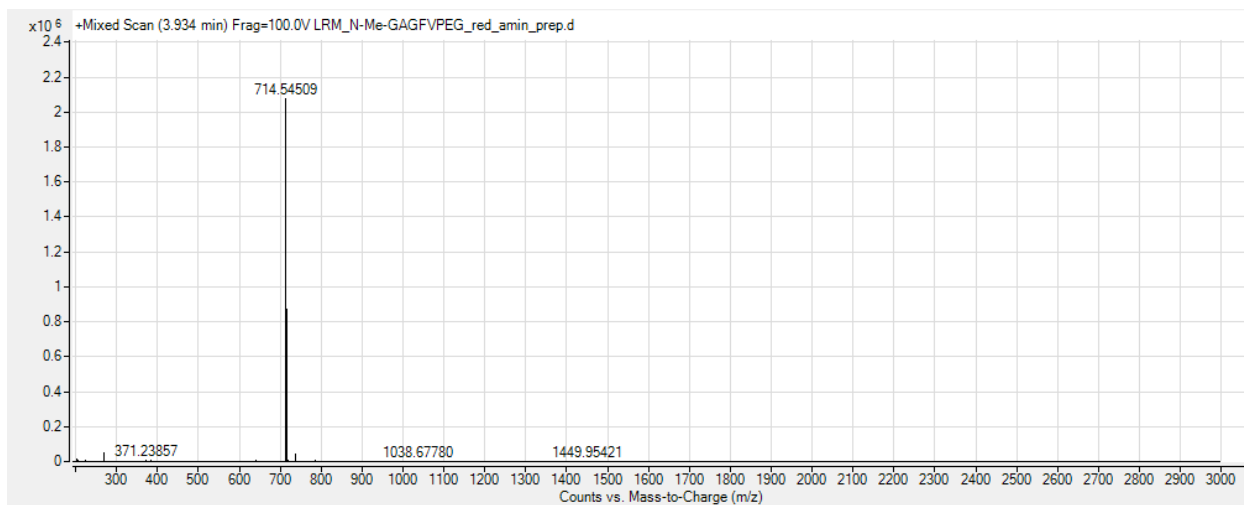

**LRMS (ESI-TOF):** calc'd for  $C_{34}H_{52}N_9O_8$   $[M+H]^+$  714.39; found 714.55.

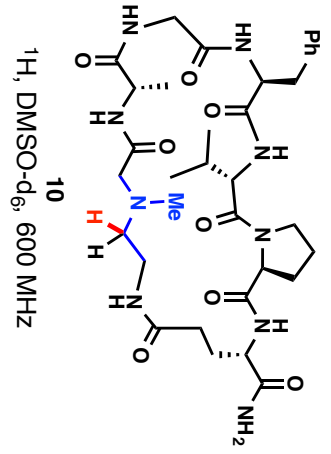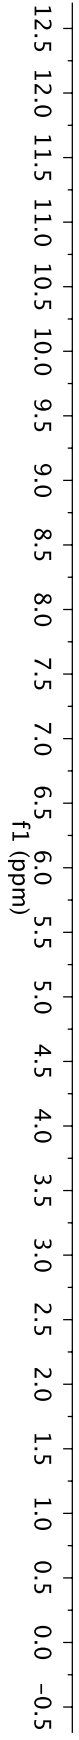

10  
COSY, DMSO-d<sub>6</sub>, 600 MHz

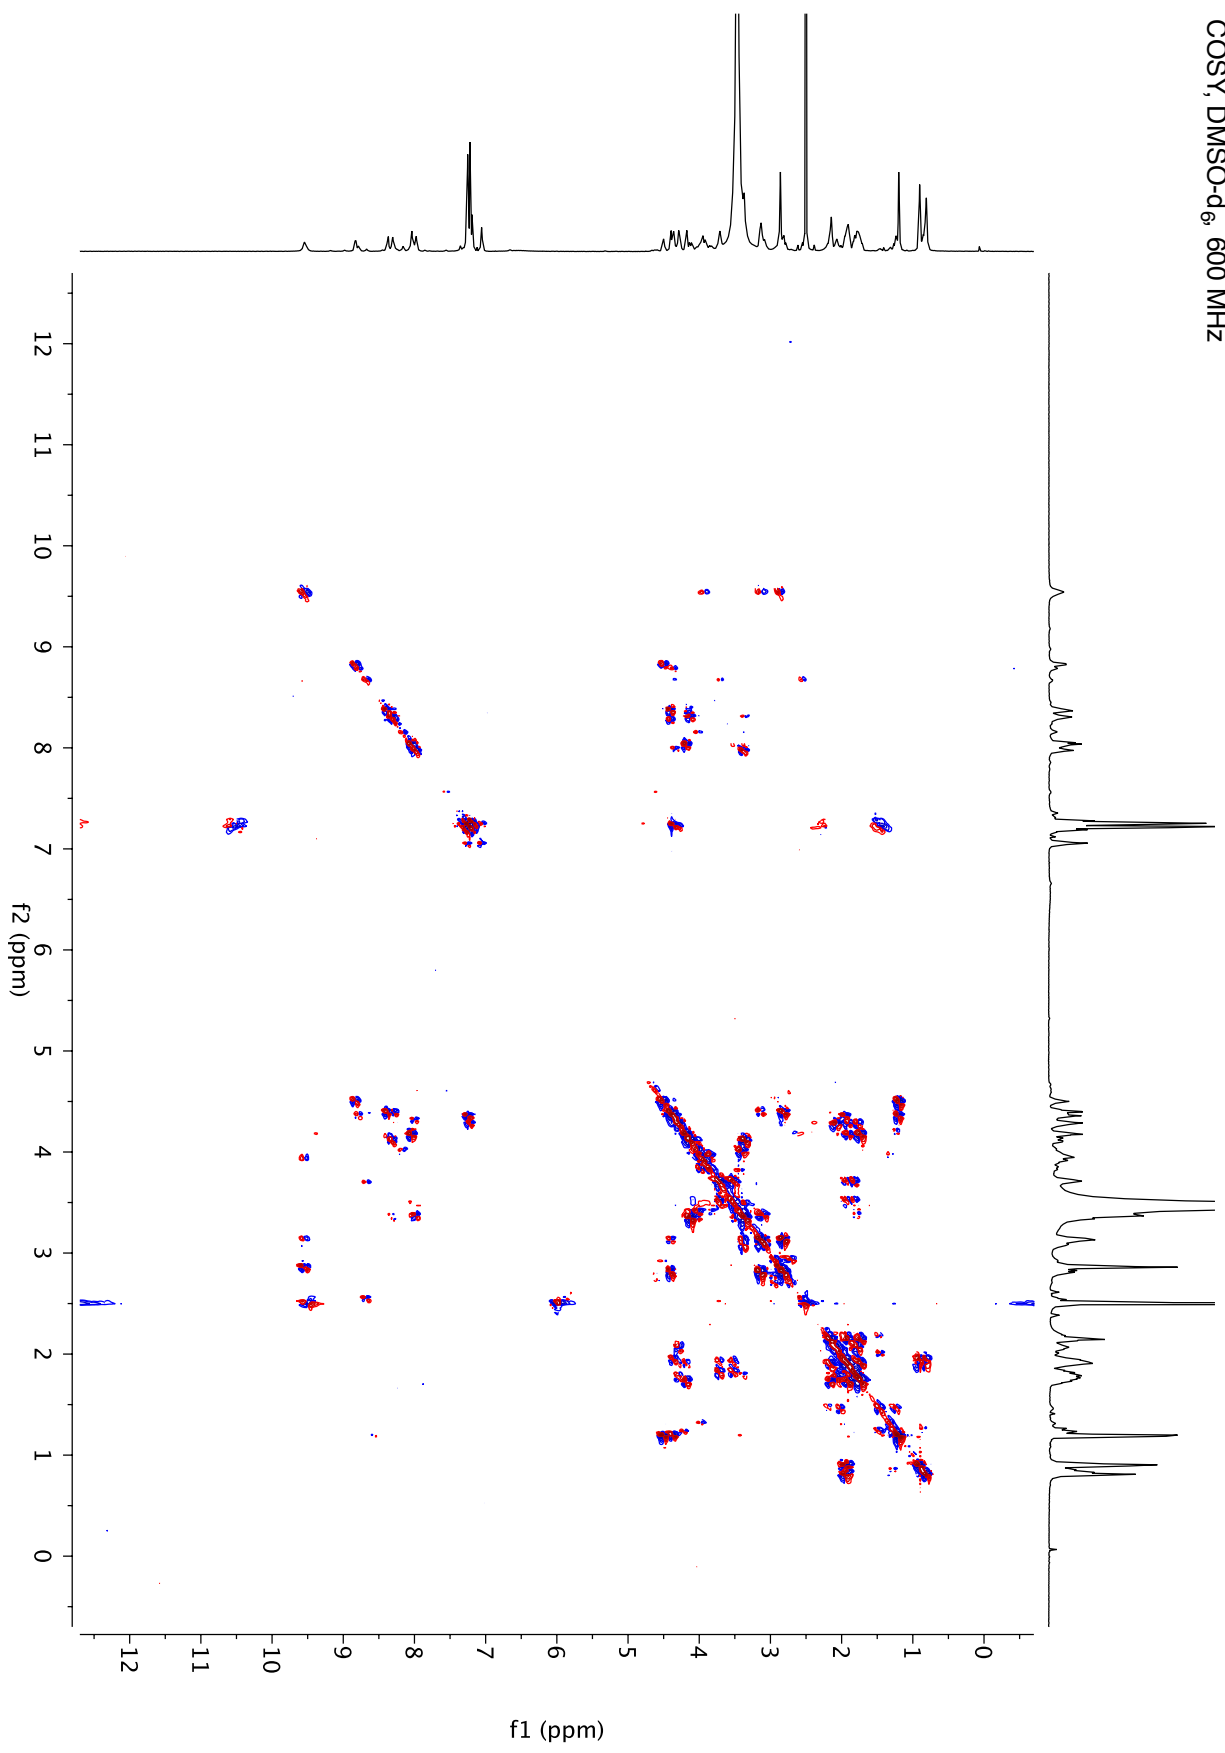

## Peptide 11

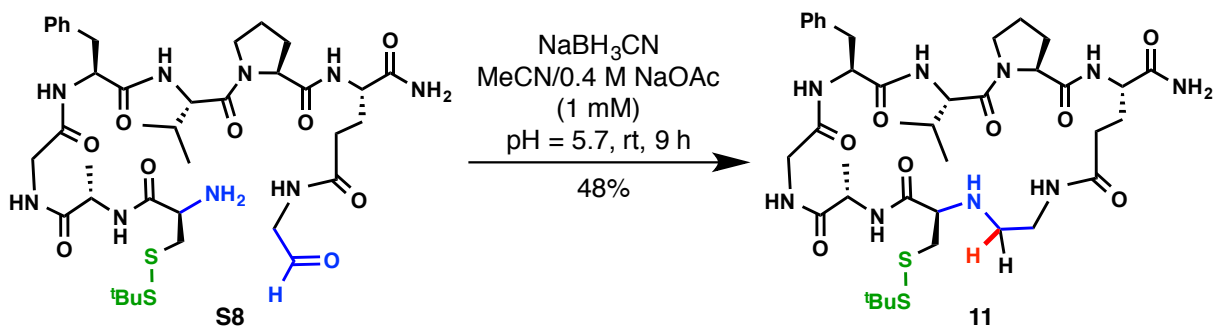

Peptide **11** was prepared according to general procedure 4 from linear amino aldehyde **S8** (3.6 mg, 4.2  $\mu$ mol). The peptide was solubilized in a 1:3 (v/v) mixture of MeCN/0.4 M NaOAc buffer (pH = 5.7). At  $t = 9$  h, the reaction was purified by preparative reverse-phase HPLC (30% B for 5 min, then 30% to 60% B over 25 min) to afford peptide macrocycle **11** (1.7 mg, 48% yield) as a white solid following lyophilization.

A) t = 9 h

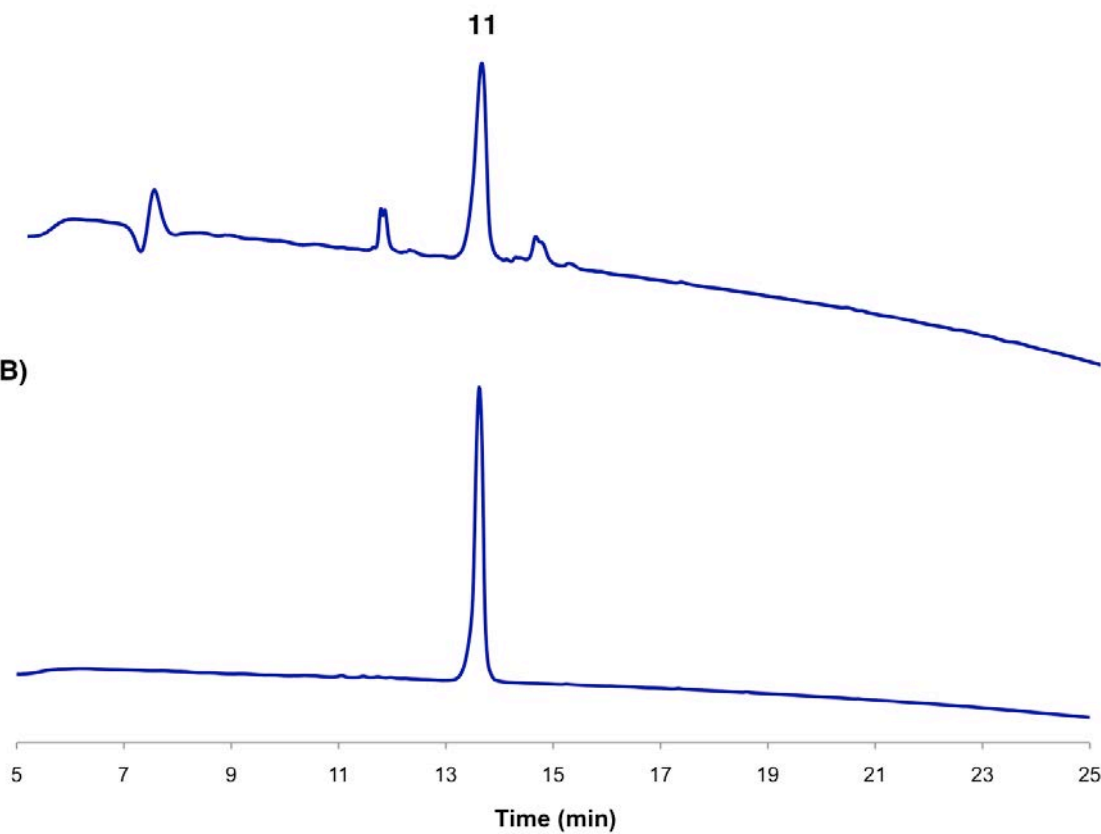

A) Crude analytical HPLC trace of the formation of **11** from amino aldehyde **S8** following reductive amination (5 to 100% B over 25 min,  $\lambda = 210$  nm). B) Purified peptide **11** ( $R_t = 13.6$  min, 5 to 100% B over 25 min,  $\lambda = 210$  nm).

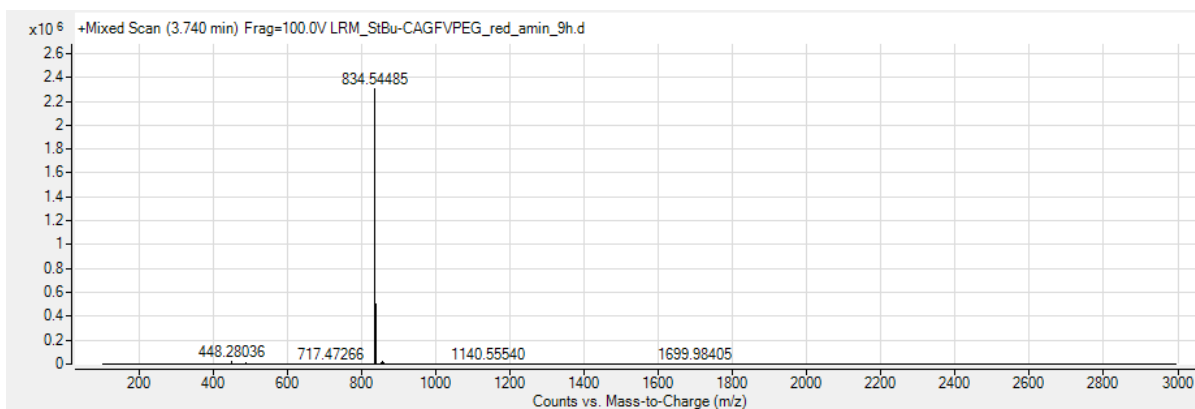

LRMS (ESI-TOF): calc'd for  $C_{38}H_{60}N_9O_8S_2$   $[M+H]^+$  834.40; found 834.54.

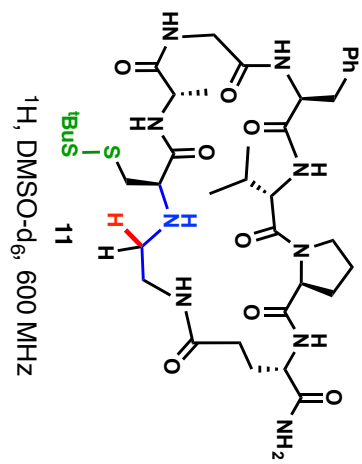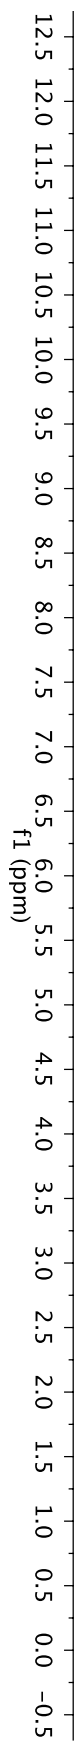



## Peptide 12

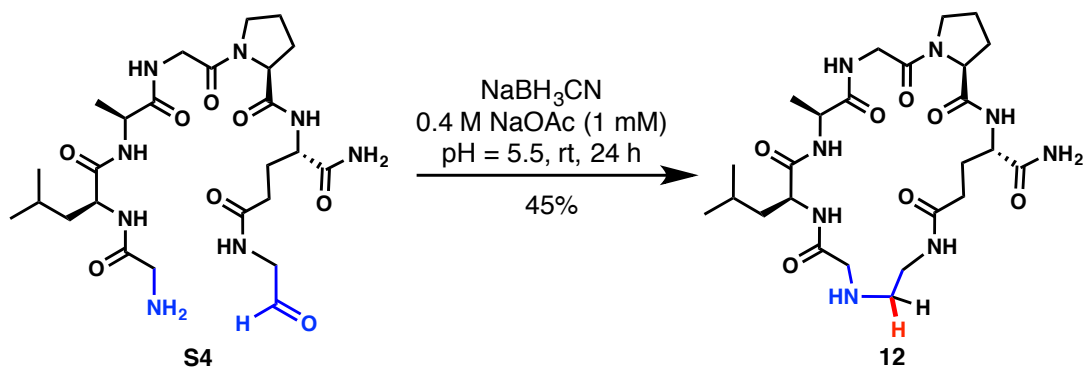

Peptide **12** was prepared according to general procedure 4 from linear amino aldehyde **S4** (10.0 mg, 17  $\mu\text{mol}$ ). At  $t = 24$  h, the reaction was purified by preparative reverse-phase HPLC (5% B for 5 min, 5% B to 40% B over 30 min) to afford peptide macrocycle **12** (4.4 mg, 45% yield) as a white solid following lyophilization.

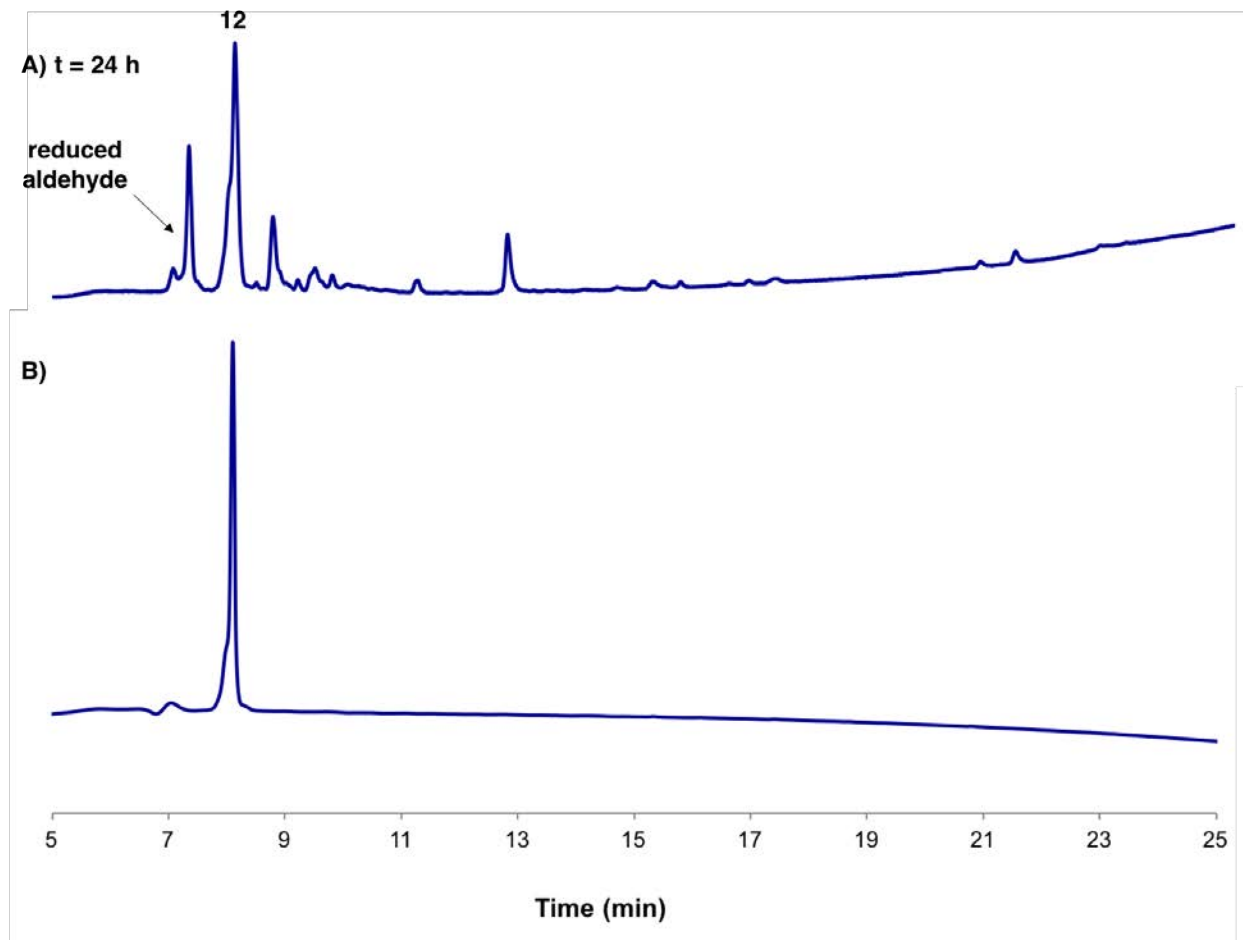

**A)** Crude analytical HPLC trace of the formation of **12** from amino aldehyde **S4** following reductive amination (5 to 100% B over 25 min,  $\lambda = 230$  nm). **B)** Purified peptide **12** ( $R_t = 8.1$  min, 5 to 100% B over 25 min,  $\lambda = 230$  nm).

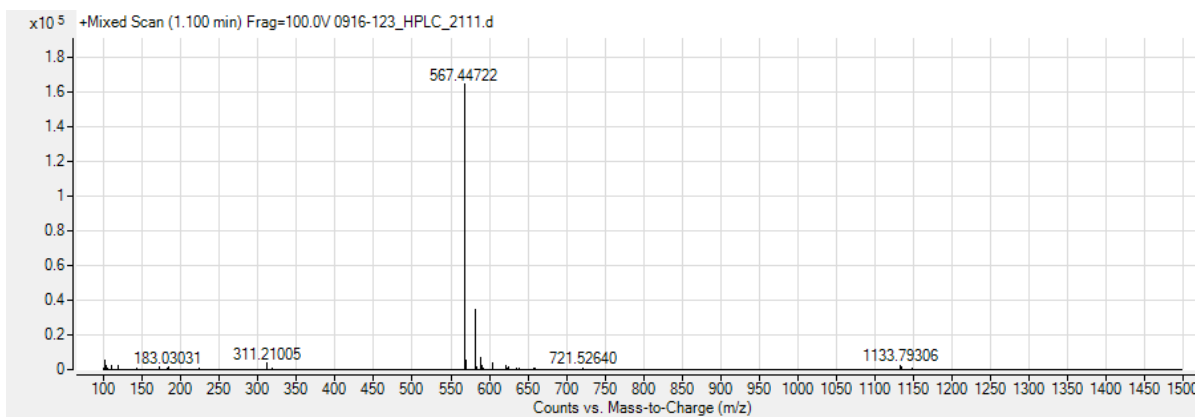

**LRMS (ESI-TOF):** calc'd for  $C_{25}H_{42}N_8O_7$   $[M+H]^+$  567.32; found 567.45.

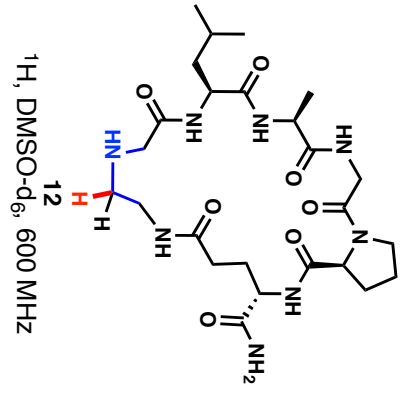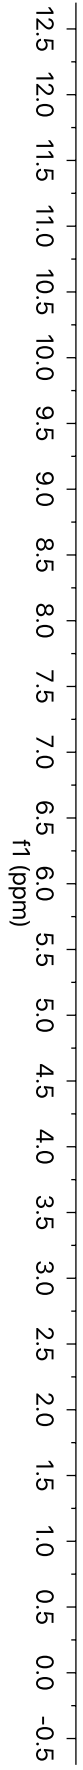

**12**  
COSY, DMSO-d<sub>6</sub>, 600 MHz

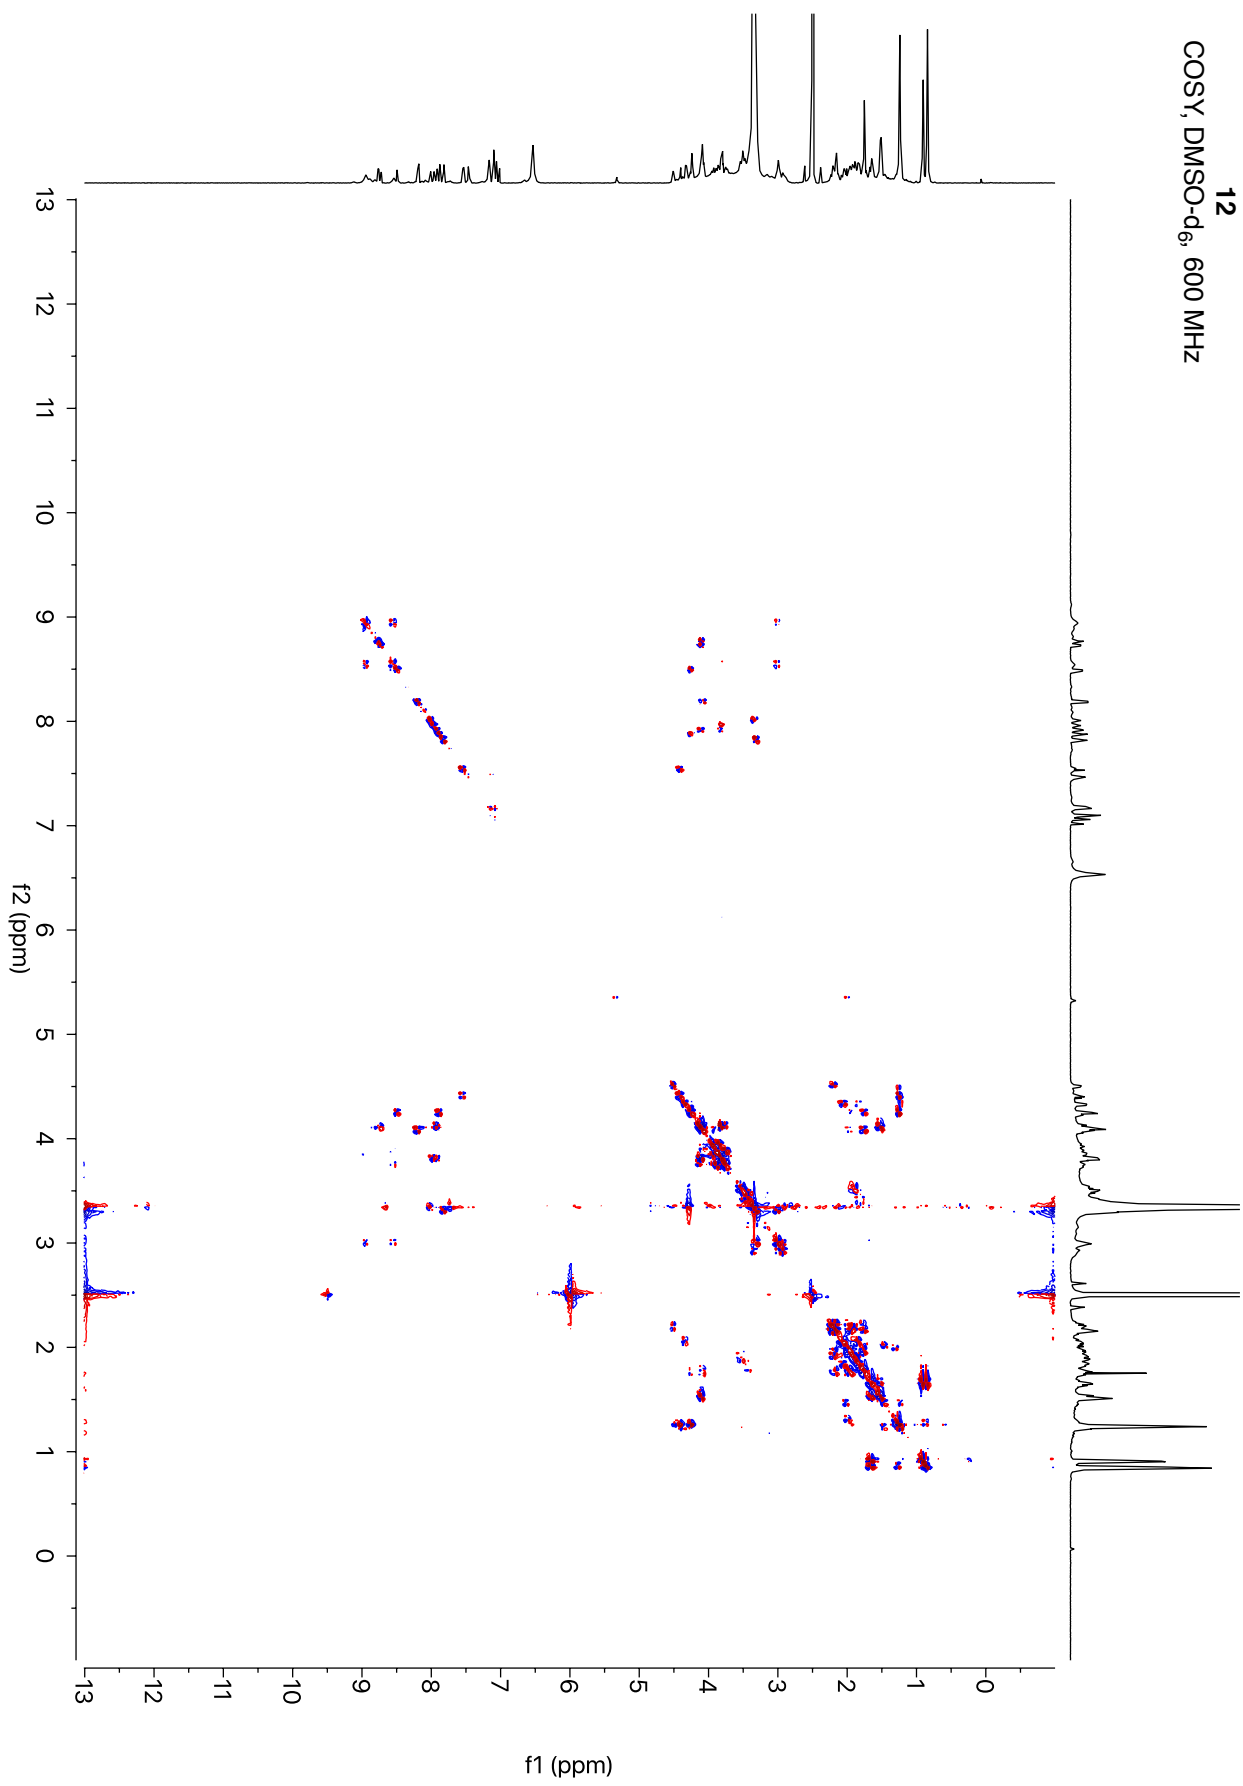

## Peptide 13

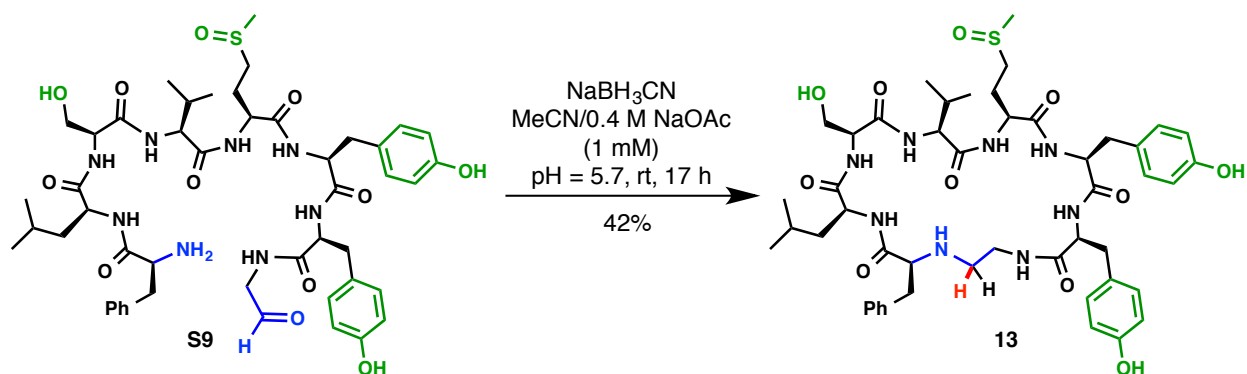

Peptide **13** was prepared according to general procedure 4 from linear amino aldehyde **S9** (4.4 mg, 4.5  $\mu\text{mol}$ ). The peptide was solubilized in a 2:3 (v/v) mixture of  $\text{MeCN}/0.4 \text{ M NaOAc}$  buffer ( $\text{pH} = 5.7$ ). At  $t = 17 \text{ h}$ , the reaction was purified by preparative reverse-phase HPLC (25% B for 5 min, then 25% to 60% B over 30 min) to afford peptide macrocycle **13** (1.8 mg, 42% yield) as a white solid following lyophilization. A small amount of macrocyclic product bearing a reduced Met residue was also isolated (0.5 mg, 12% yield).

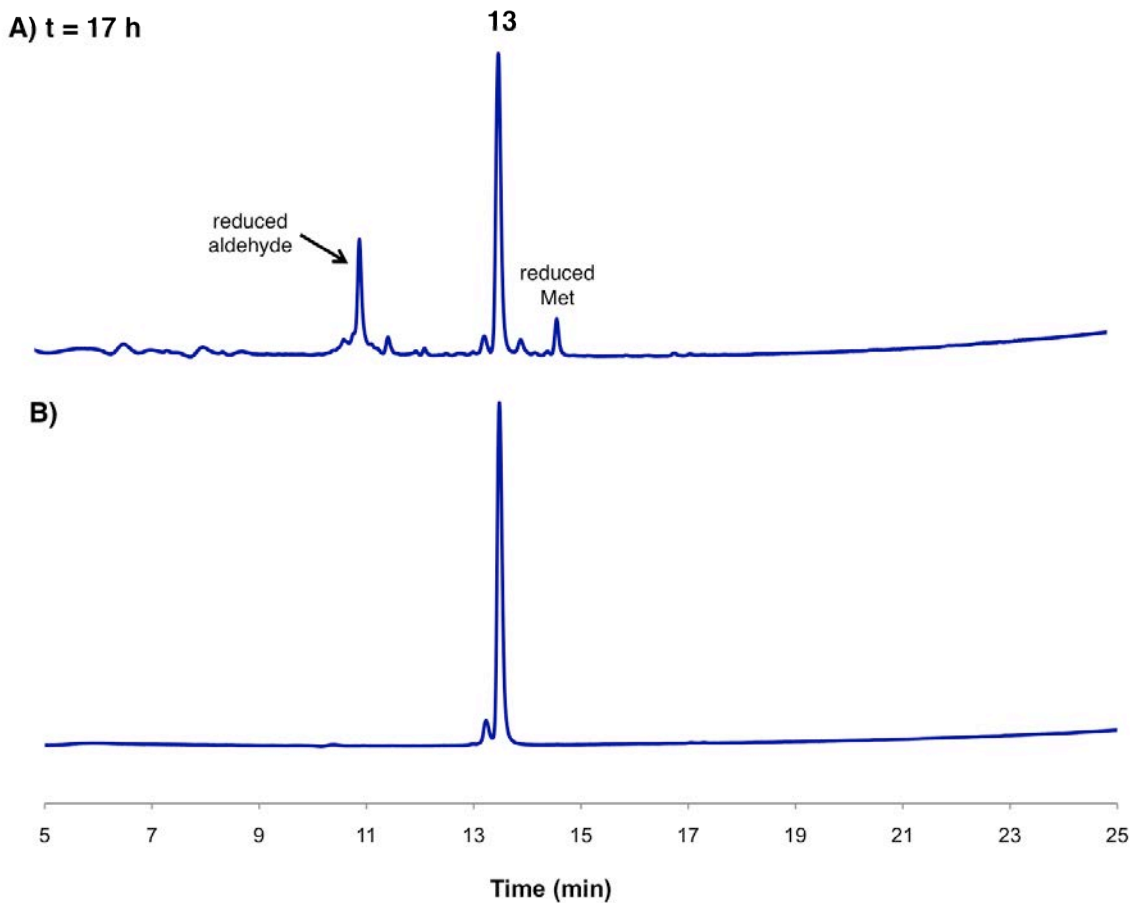

**A)** Crude analytical HPLC trace of the formation of **13** from amino aldehyde **S9** following reductive amination (5 to 100% B over 25 min,  $\lambda = 230$  nm). **B)** Purified peptide **13** ( $R_t = 13.5$  min, 5 to 100% B over 25 min,  $\lambda = 230$  nm).

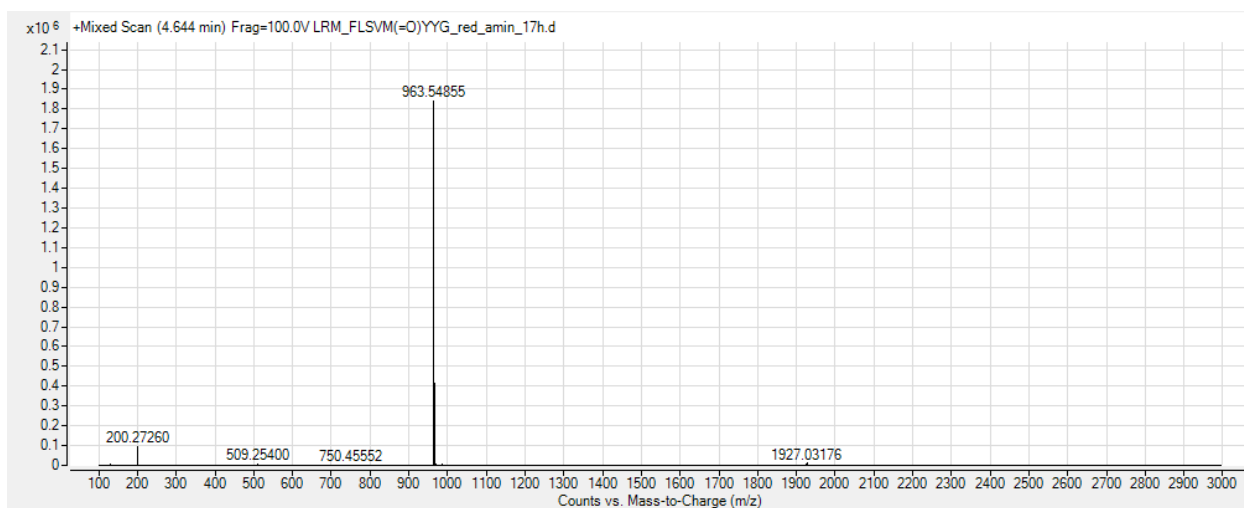

**LRMS (ESI-TOF):** calc'd for  $C_{48}H_{67}N_8O_{11}S$   $[M+H]^+$  963.46; found 963.55.

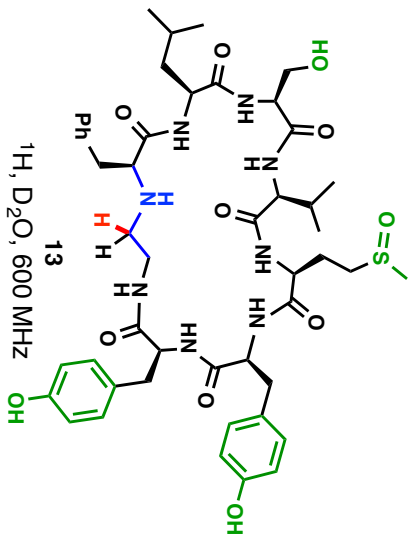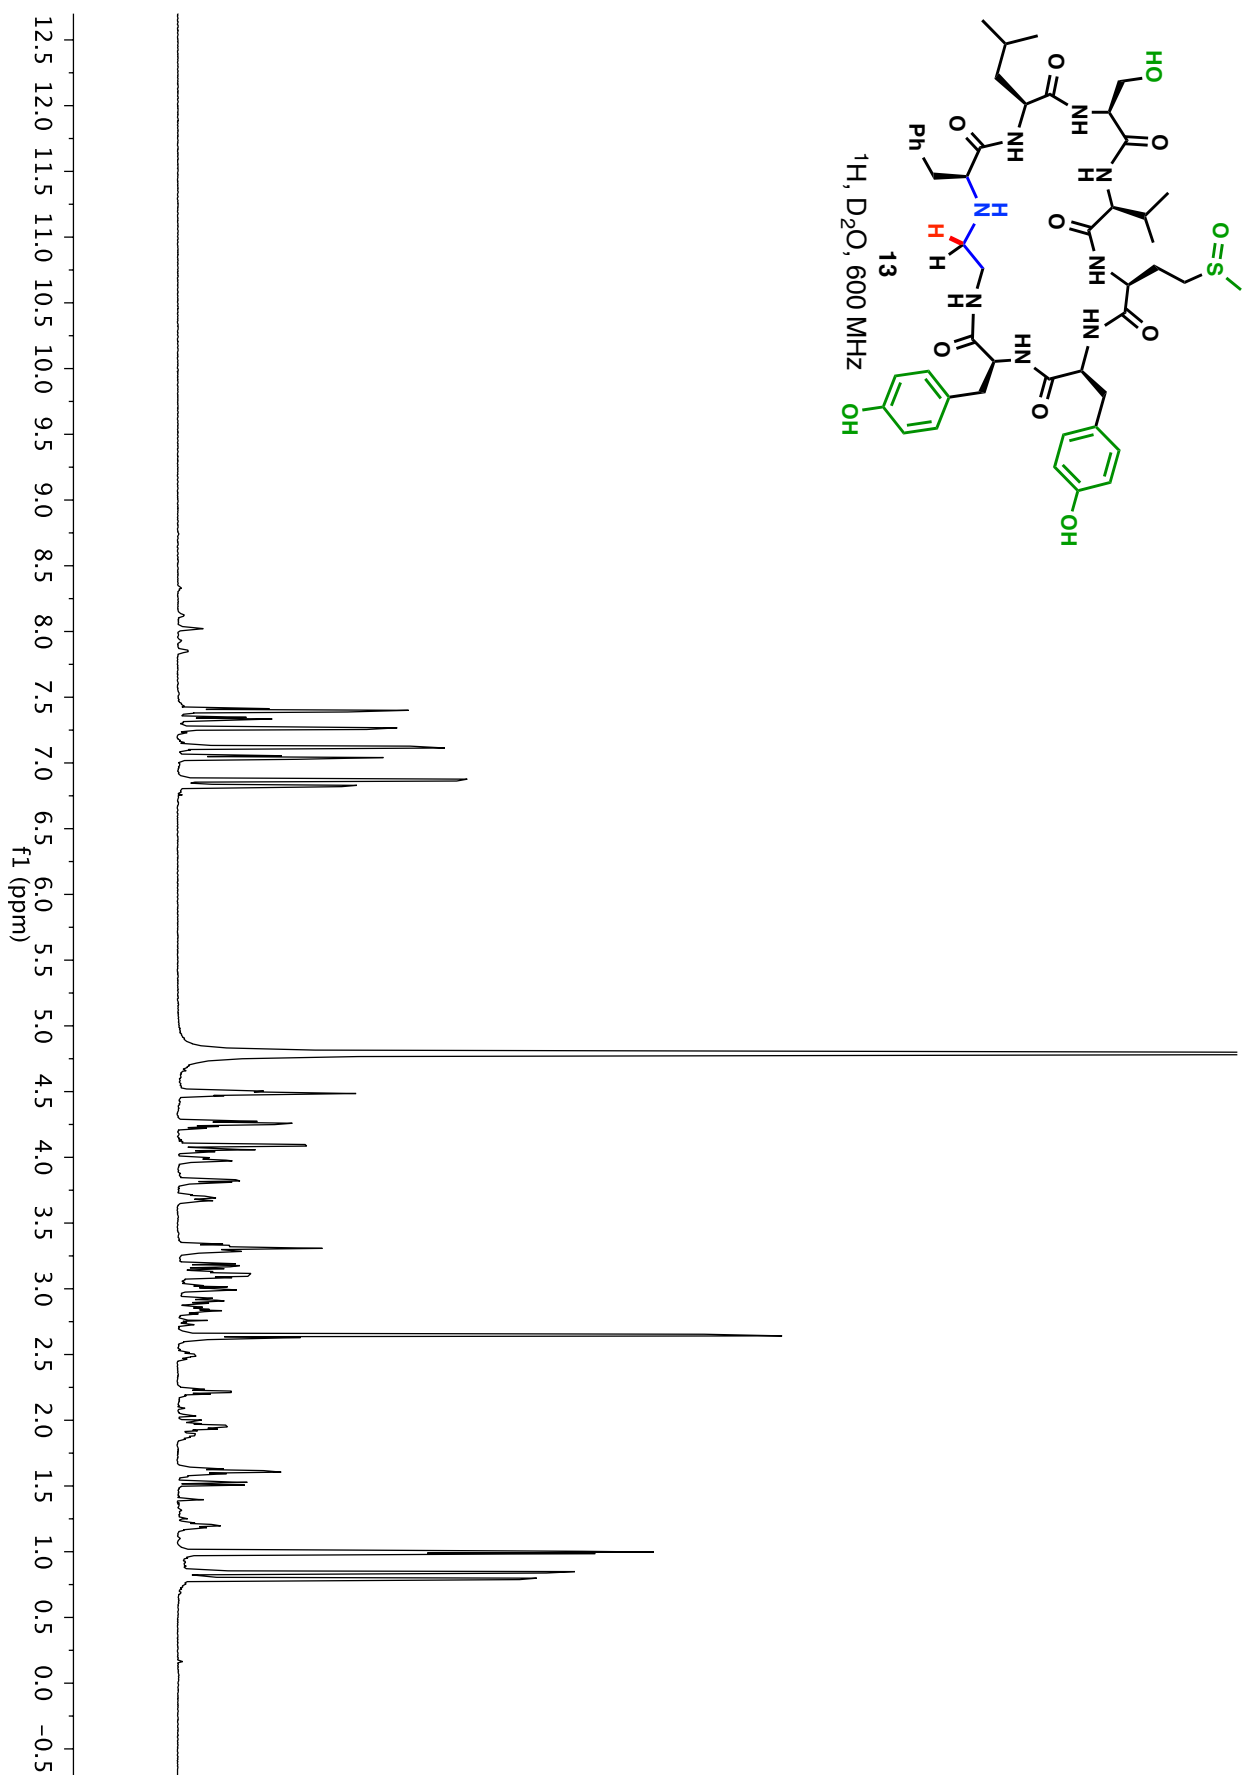

<sup>13</sup>COSY, D<sub>2</sub>O, 600 MHz

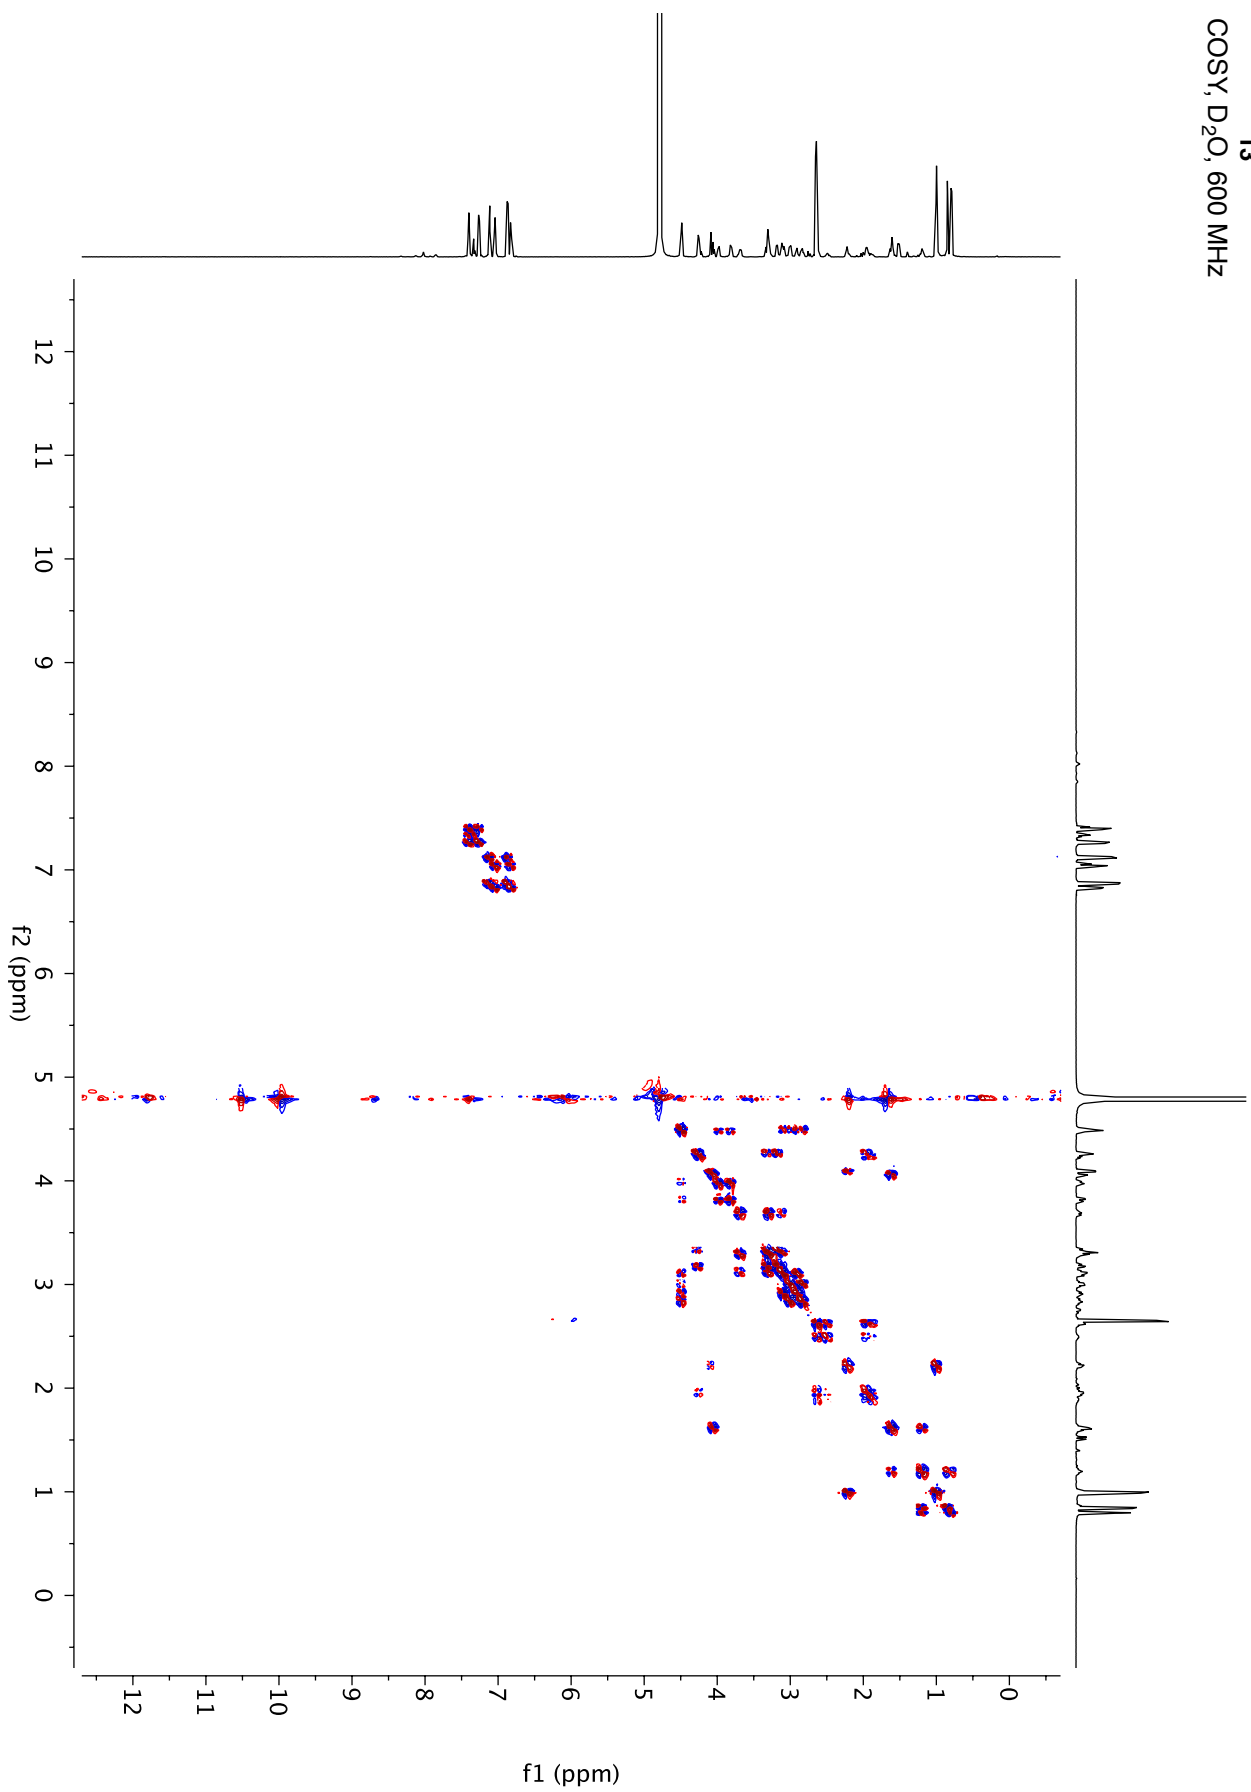

S132



## Peptide 14

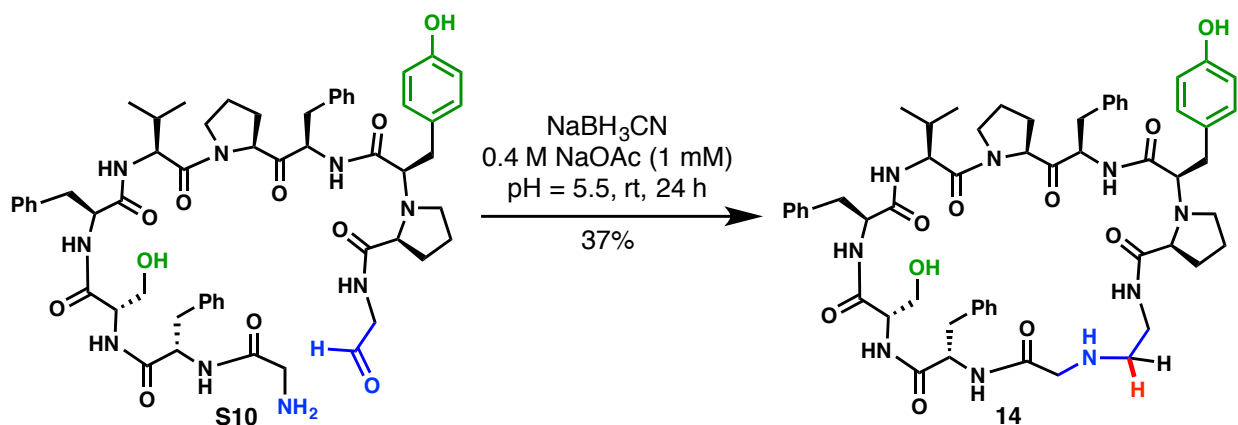

Peptide **14** was prepared according to general procedure 4 from linear amino aldehyde **S10** (5.1 mg, 4.63  $\mu$ mol). At  $t = 24$  h, the reaction was purified by preparative reverse-phase HPLC (40% B for 5 min, then 40% to 80% B over 30 min) to afford peptide macrocycle **14** (1.9 mg, 37% yield) as a white solid following lyophilization.

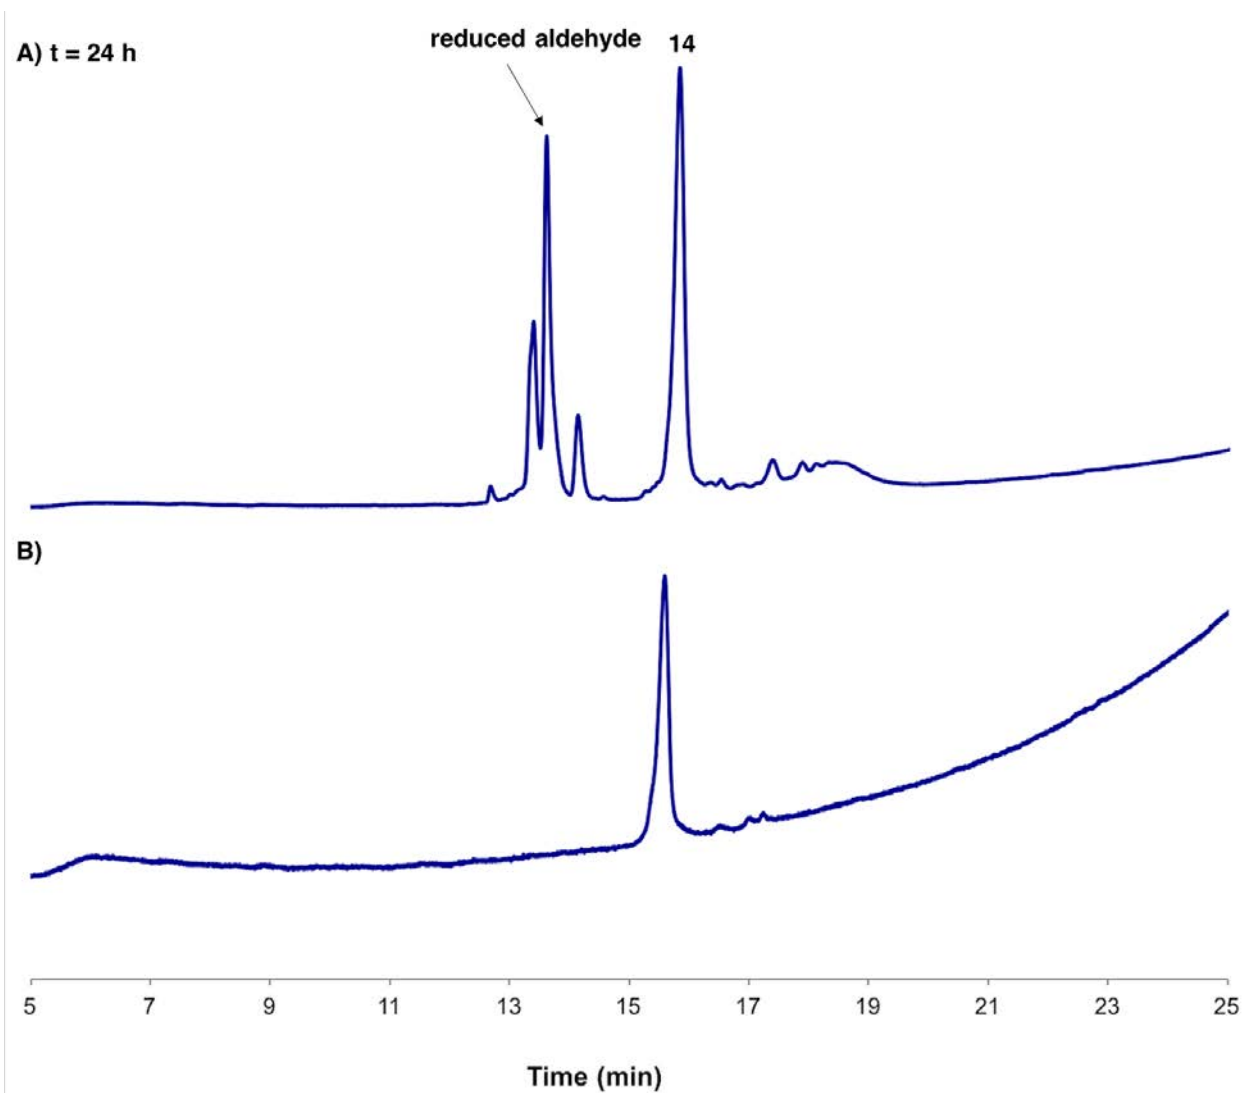

**A)** Crude analytical HPLC trace of the formation of **14** from amino aldehyde **S10** following reductive amination (0 to 100% B over 25 min,  $\lambda = 210$  nm). **B)** Purified peptide **14** ( $R_t = 15.6$  min, 0 to 100% B over 25 min,  $\lambda = 210$  nm).

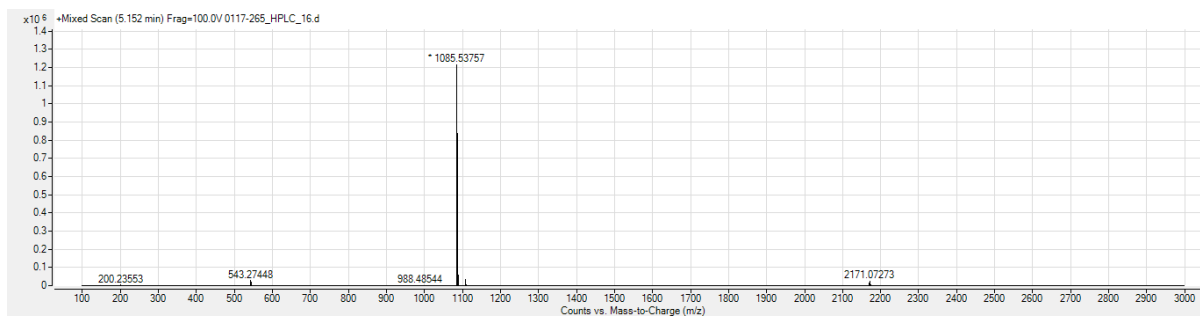

**LRMS (ESI-TOF):** calc'd for  $C_{26}H_{40}N_5O_5$   $[M+H]^+$  1085.55; found 1085.54.

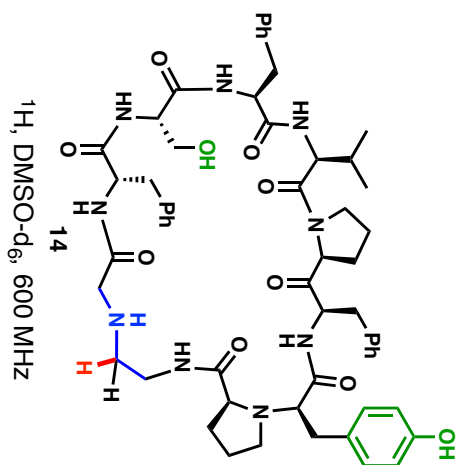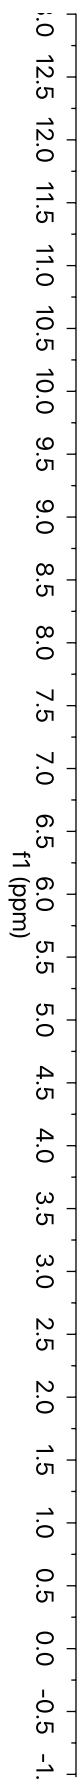

14  
COSY, DMSO-d<sub>6</sub>, 600 MHz

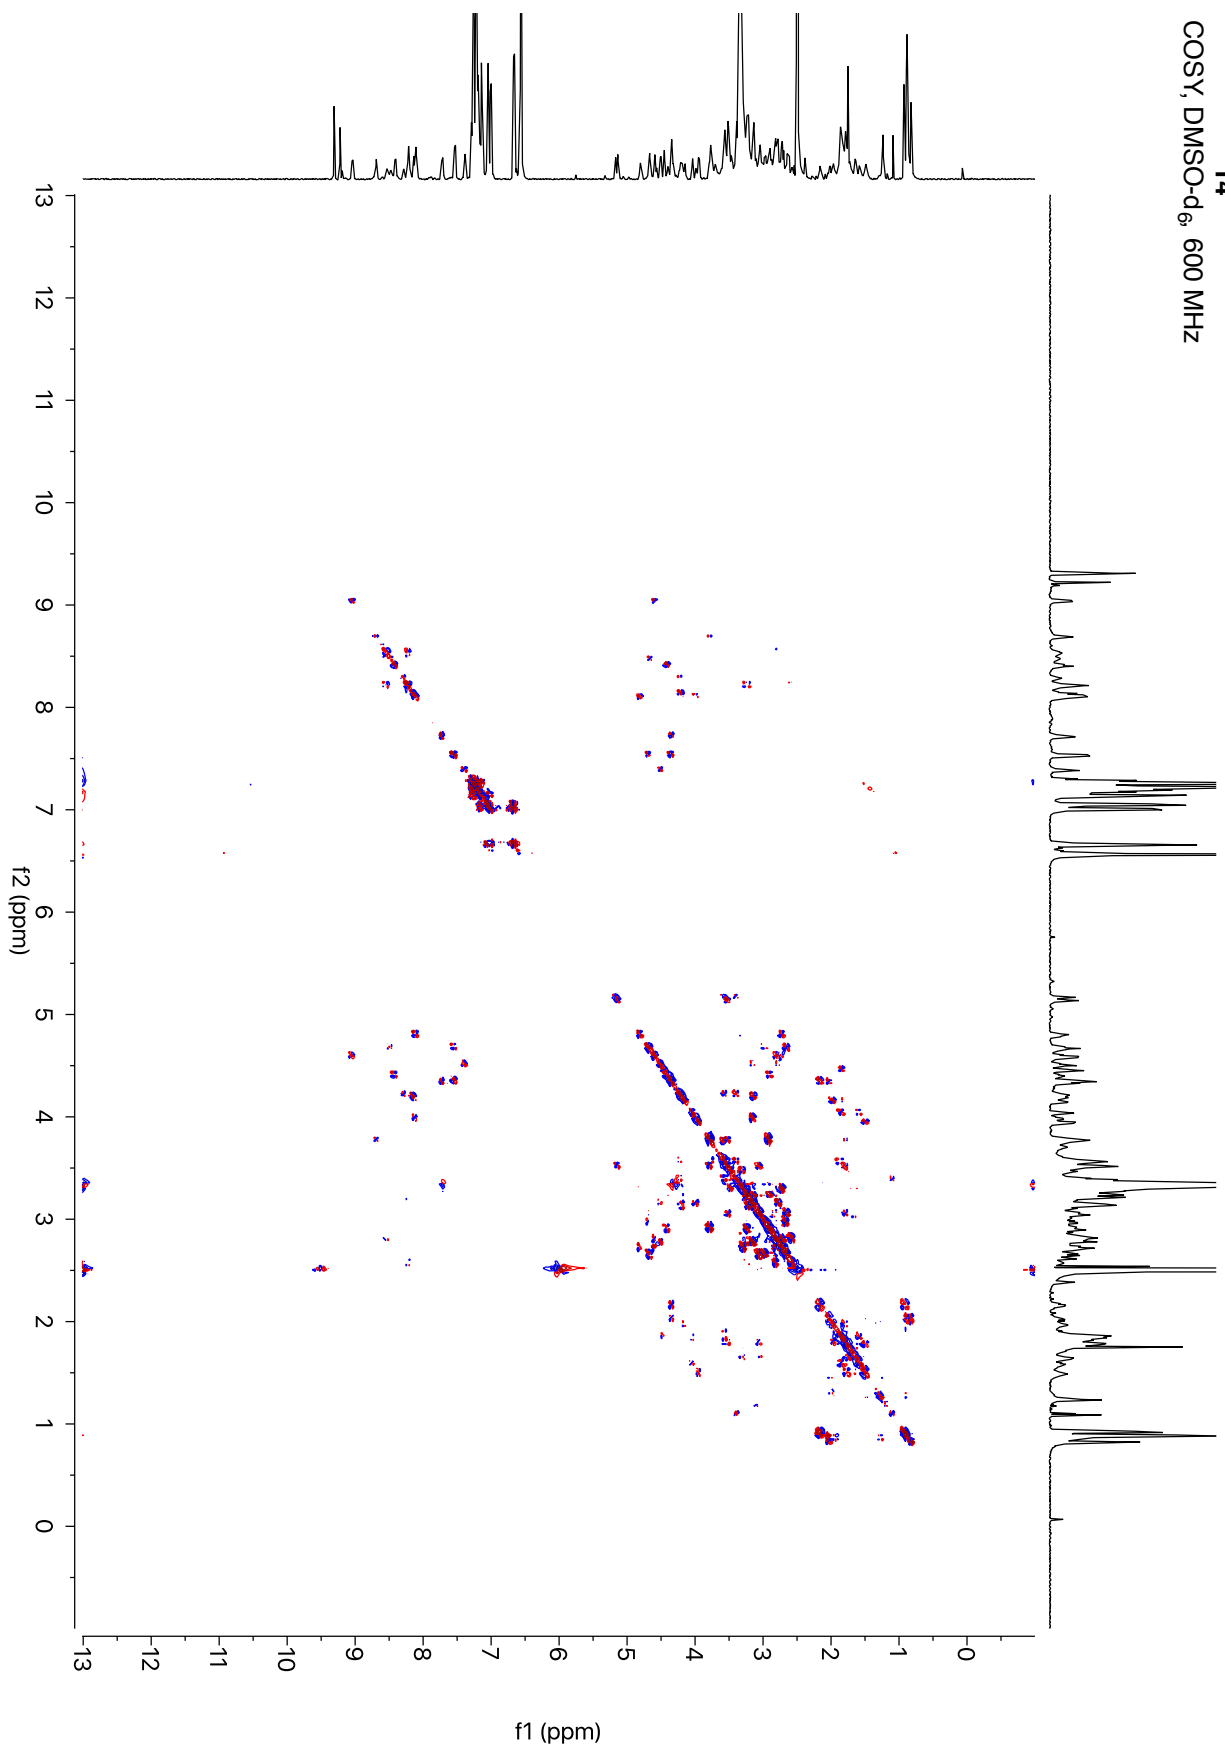

## Peptide 15

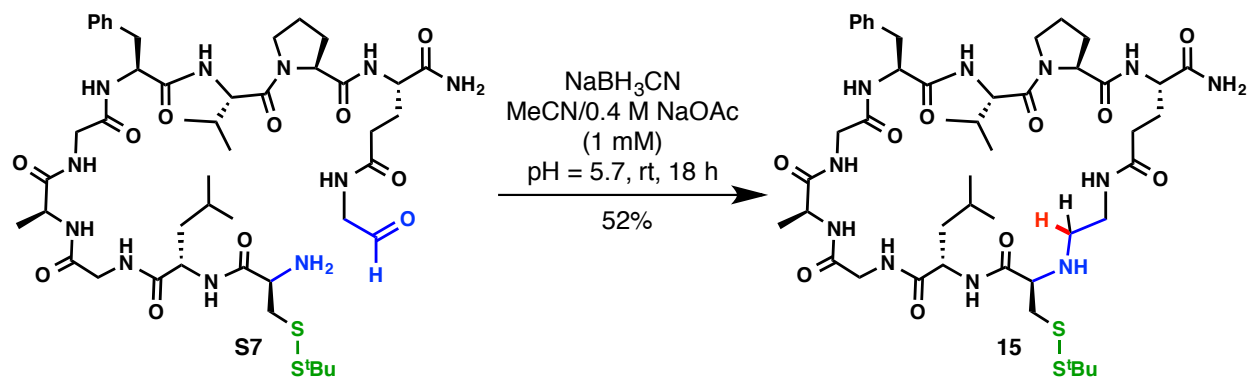

Peptide **15** was prepared according to general procedure 4 from linear amino aldehyde **S7** (4.5 mg, 4.4  $\mu\text{mol}$ ). The peptide was solubilized in a 1:3.6 (v/v) mixture of MeCN/0.4 M NaOAc buffer ( $\text{pH} = 5.7$ ). At  $t = 18 \text{ h}$ , the reaction was purified by preparative reverse-phase HPLC (25% B for 5 min, then 25% to 60% B over 30 min) to afford peptide macrocycle **15** (2.3 mg, 52% yield) as a white solid following lyophilization.

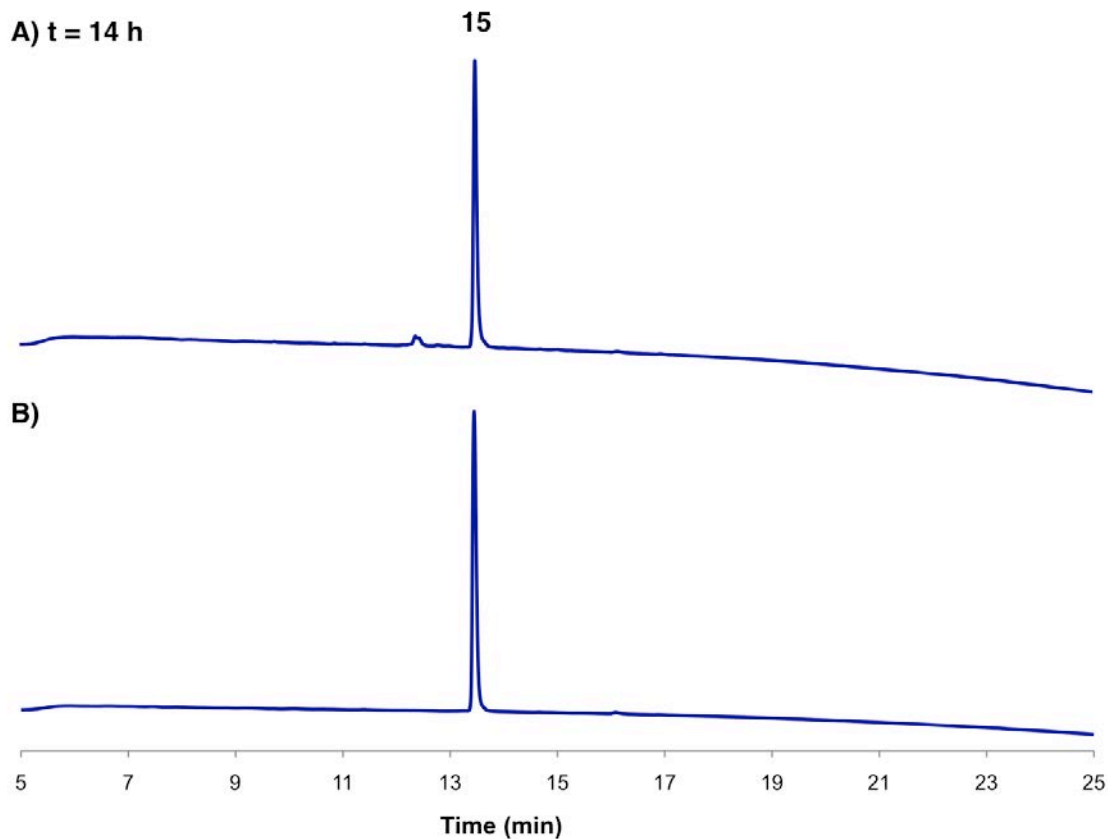

**A)** Crude analytical HPLC trace of the formation of **15** from amino aldehyde **S7** following reductive amination (5 to 100% B over 25 min,  $\lambda = 210$  nm). **B)** Purified peptide **15** ( $R_t = 13.4$  min, 5 to 100% B over 25 min,  $\lambda = 210$  nm).

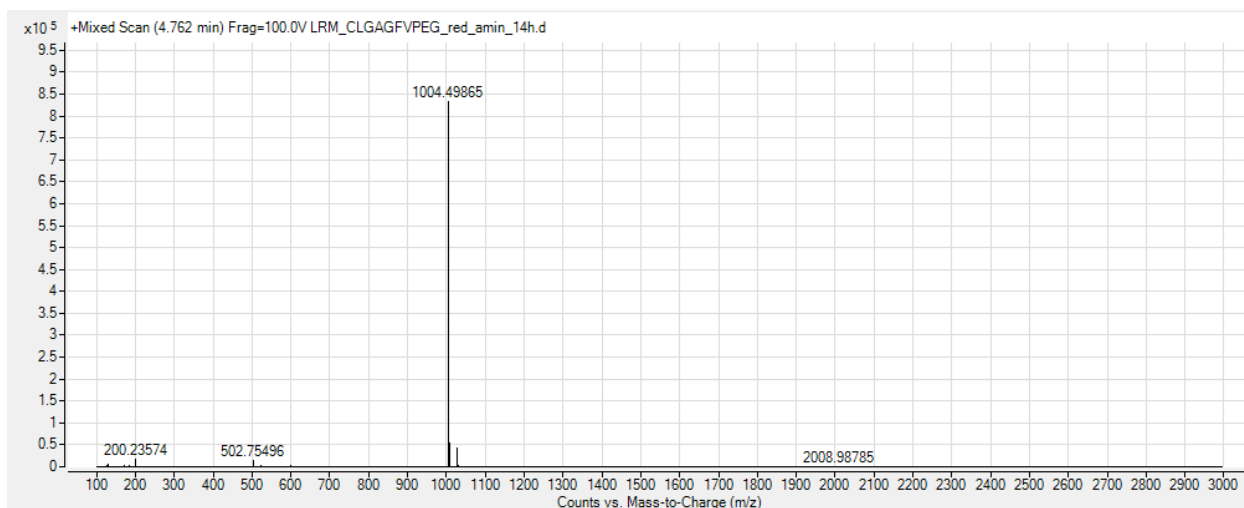

**LRMS (ESI-TOF):** calc'd for  $C_{46}H_{74}N_{11}O_{10}S_2$   $[M+H]^+$  1004.51; found 1004.50.

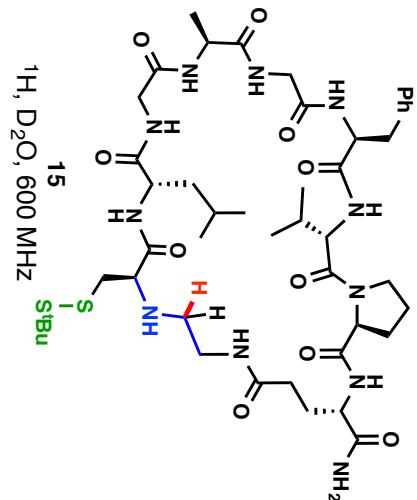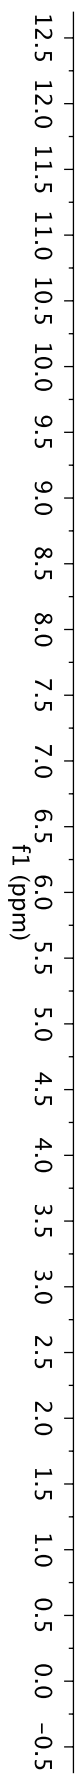

15  
COSY, D<sub>2</sub>O, 600 MHz

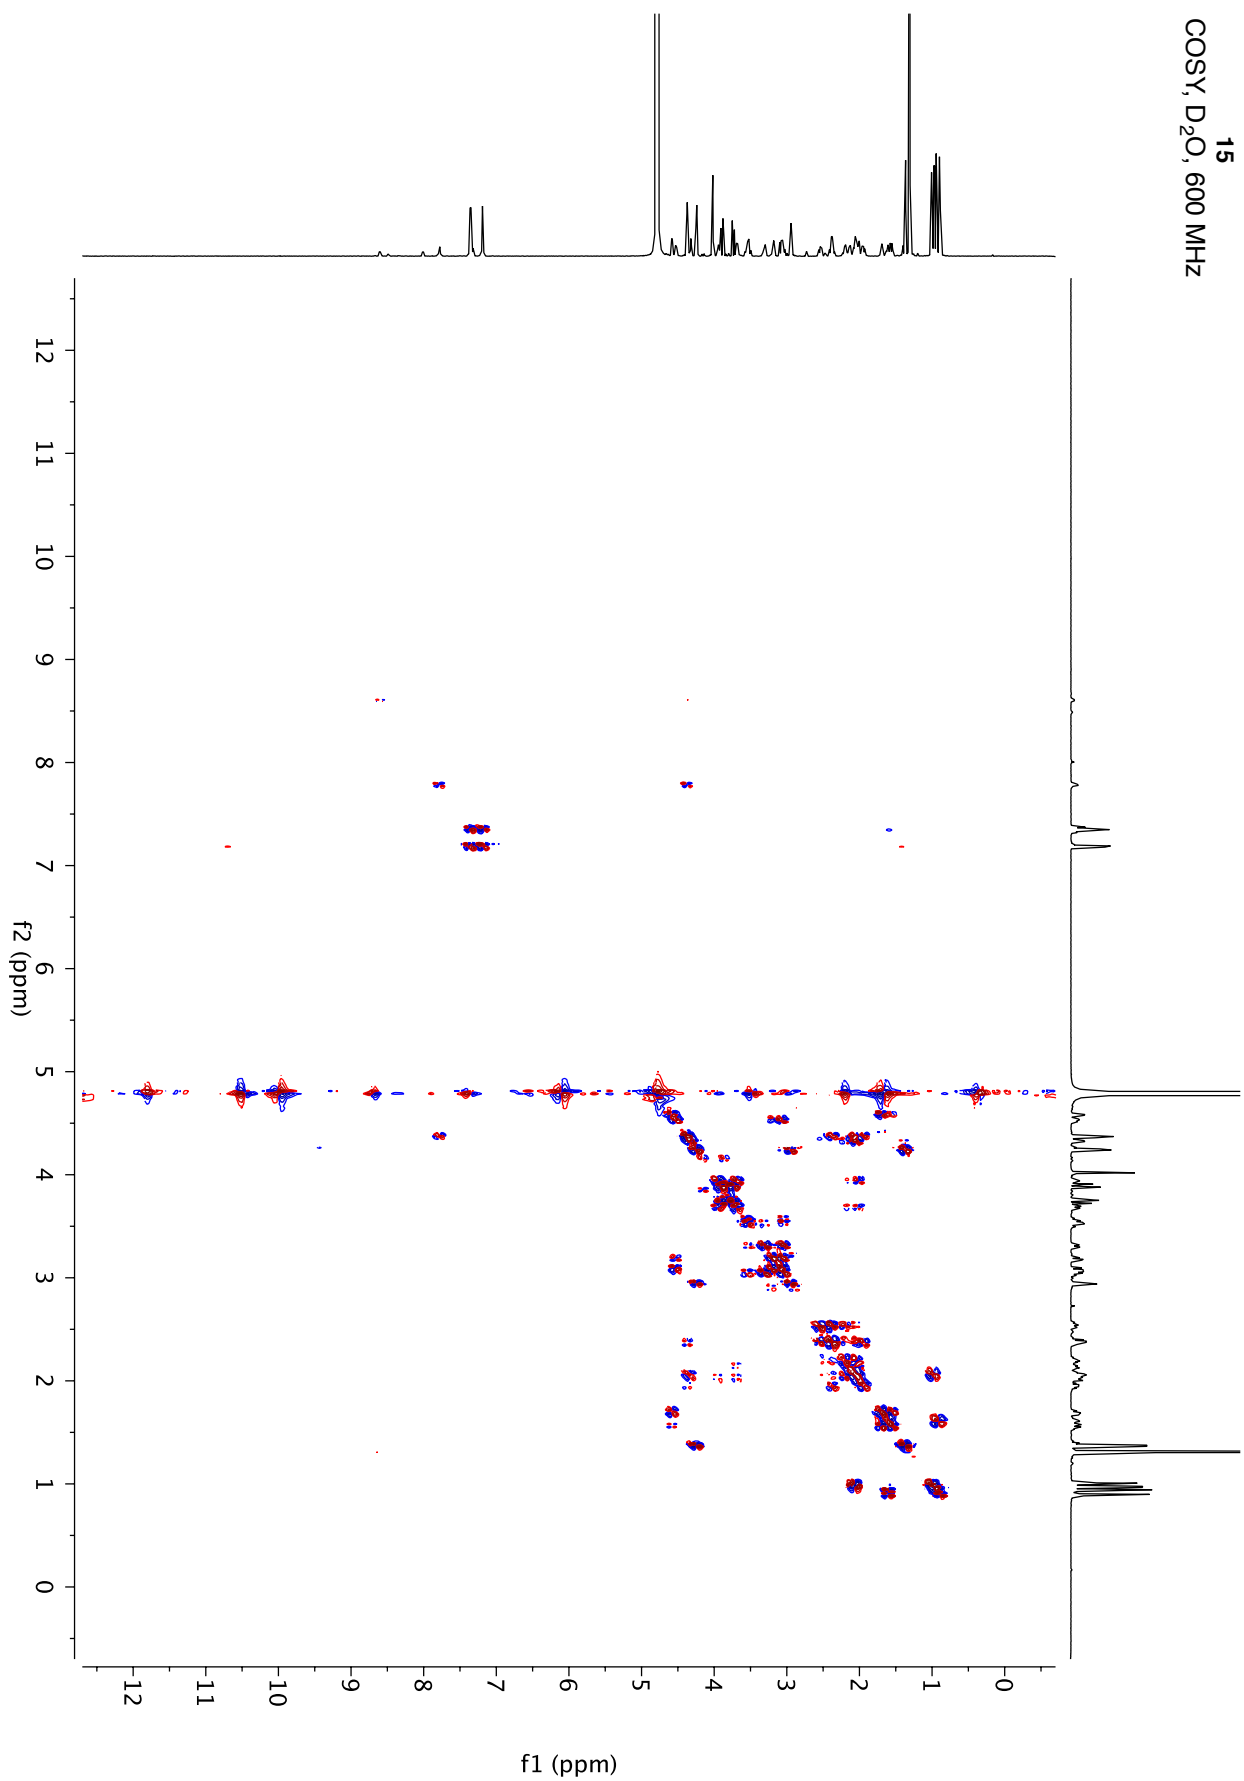

S140



## Peptide 16

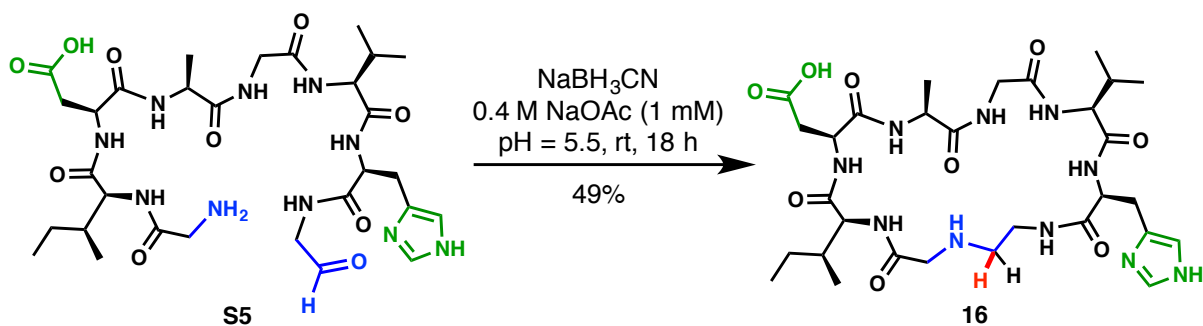

Peptide **16** was prepared according to general procedure 4 from linear amino aldehyde **S5** ( $4.2 \text{ mg}$ ,  $5.93 \mu\text{mol}$ ). At  $t = 18 \text{ h}$ , the reaction was purified by preparative reverse-phase HPLC ( $5\% \text{ B}$  for  $5 \text{ min}$ , then  $5\%$  to  $40\% \text{ B}$  over  $30 \text{ min}$ ) to afford peptide macrocycle **16** ( $2.0 \text{ mg}$ ,  $49\%$  yield) as a white solid following lyophilization.

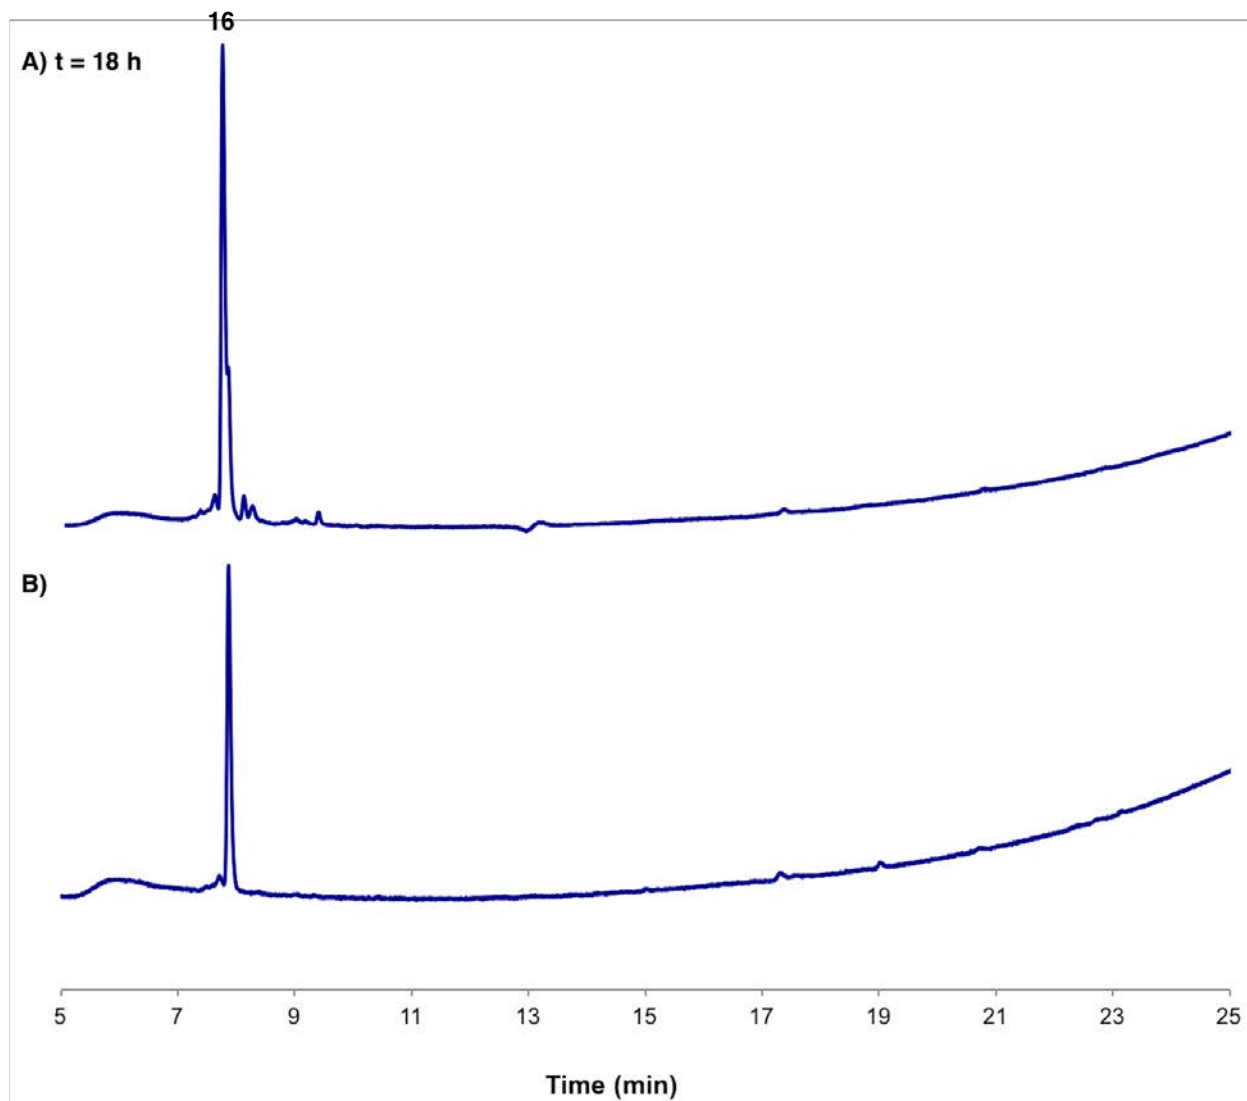

**A)** Crude analytical HPLC trace of the formation of **16** from amino aldehyde **S5** following reductive amination (0 to 100% B over 25 min,  $\lambda = 230$  nm). **B)** Purified peptide **16** ( $R_t = 7.86$  min, 0 to 100% B over 25 min,  $\lambda = 230$  nm).

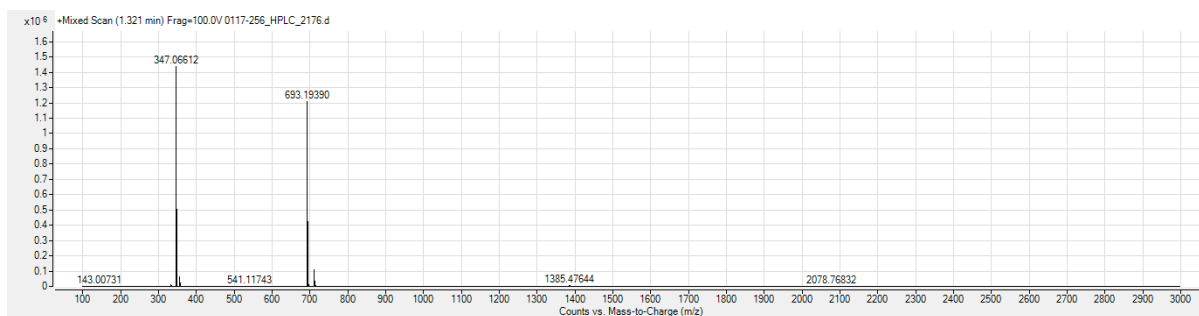

**LRMS (ESI-TOF):** calc'd for  $C_{26}H_{40}N_5O_5$   $[M+H]^+$  693.37; found 693.19,  $[M+2H]^{2+}$  347.19; found 347.07.

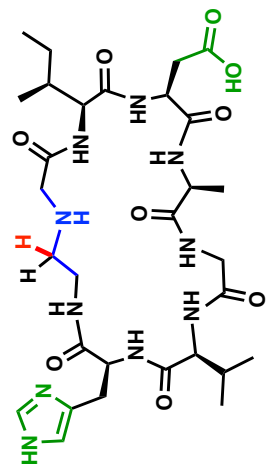

<sup>1</sup>H, DMSO-d<sub>6</sub>/D<sub>2</sub>O (20:1 v/v), 600 MHz

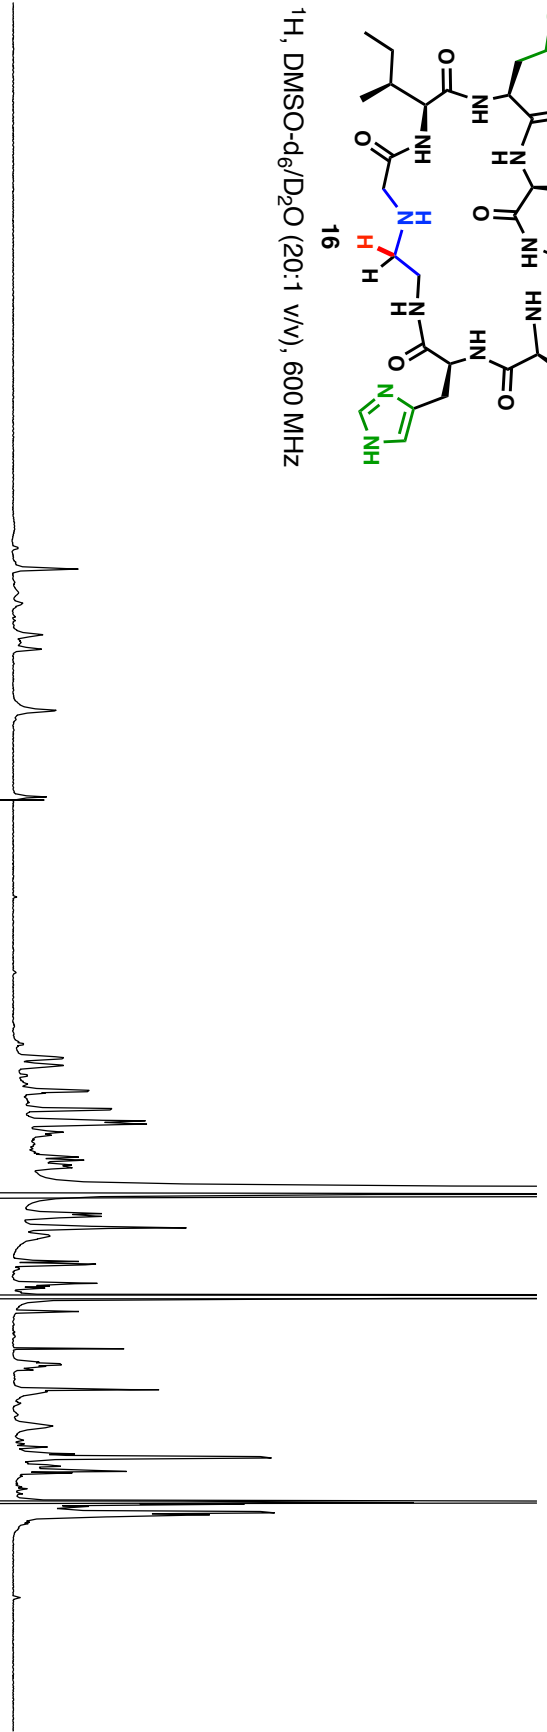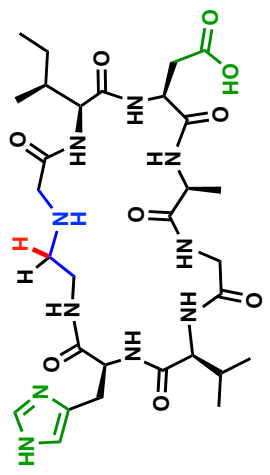

<sup>1</sup>H, DMSO-d<sub>6</sub>, 600 MHz

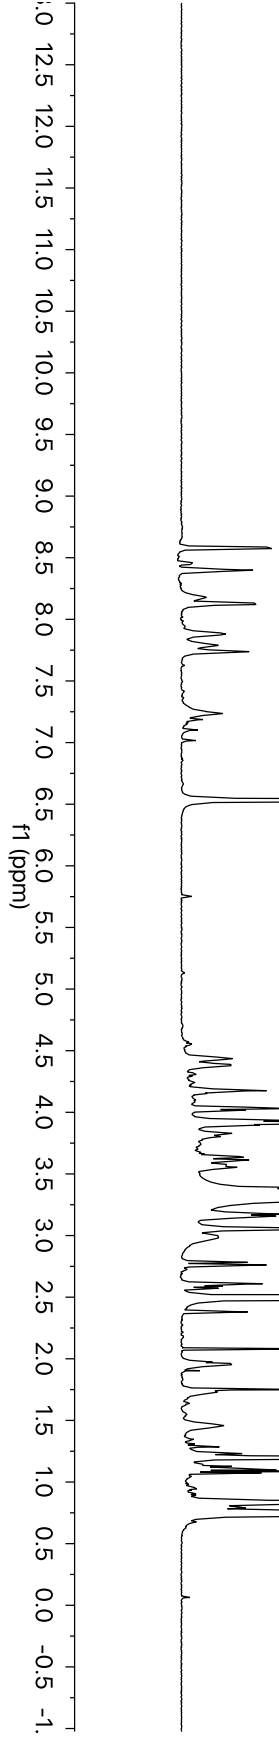

## Peptide 17

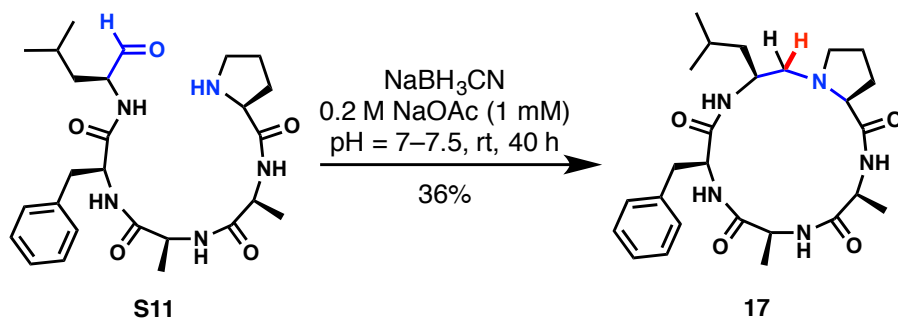

Peptide **17** was prepared according to general procedure 4 from linear amino aldehyde **S11** (9.5 mg, 19.0  $\mu\text{mol}$ ). The peptide was solubilized in 0.2 M NaOAc buffer (pH = 7–7.5). At  $t = 40$  h, the reaction was purified by preparative reverse-phase HPLC (15% B for 5 min, 15% to 55% B over 25 min, then 55% to 70% B over 10 min) to afford peptide macrocycle **17** (3.3 mg, 36% yield) as a white solid following lyophilization. Reduction of the starting aldehyde was also observed (3.1 mg, 36% yield).

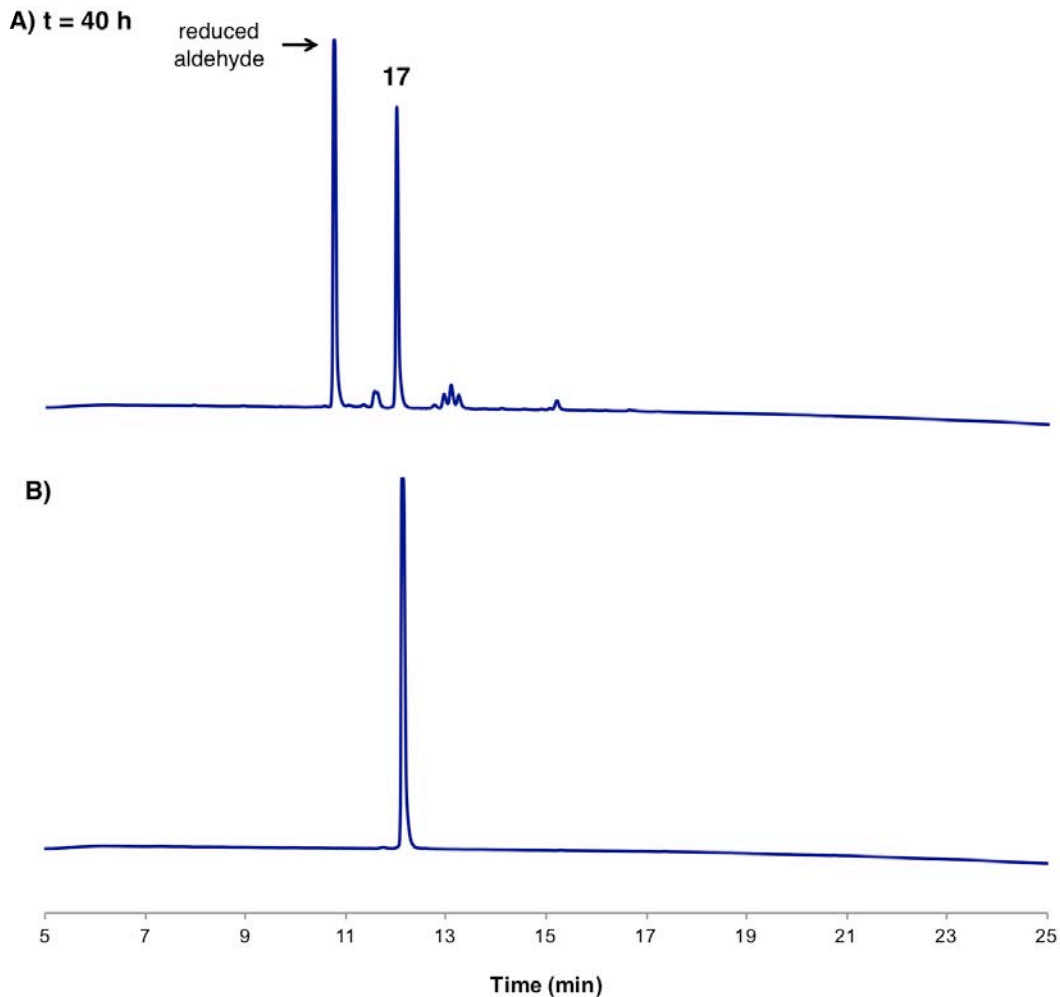

**A)** Crude analytical HPLC trace of the formation of **17** from amino aldehyde **S11** following reductive amination (5 to 100% B over 25 min,  $\lambda = 210$  nm). **B)** Purified peptide **17** ( $R_t = 12.1$  min, 5 to 100% B over 25 min,  $\lambda = 210$  nm).

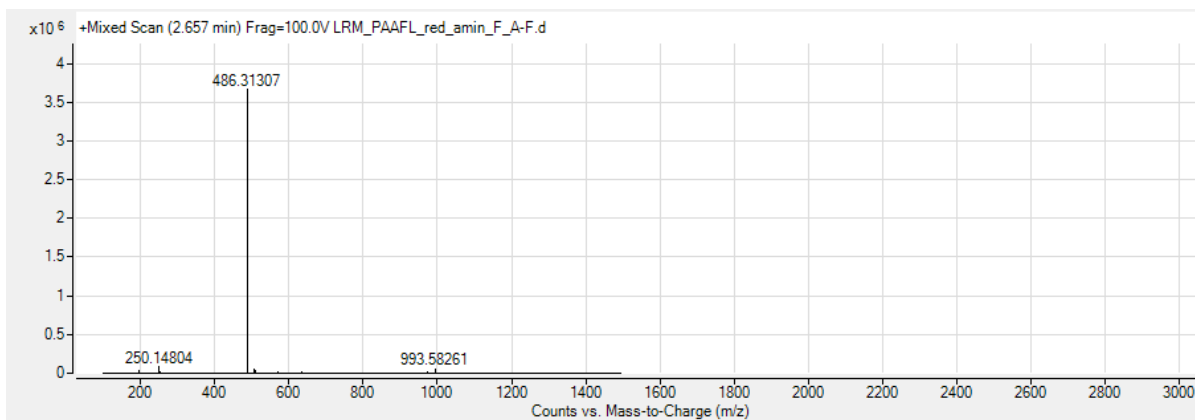

**LRMS (ESI-TOF):** calc'd for  $C_{26}H_{40}N_5O_4$   $[M+H]^+$  486.31; found 486.31.

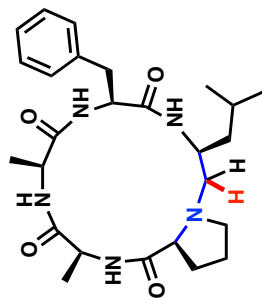

<sup>1</sup>H, DMSO-d<sub>6</sub>/D<sub>2</sub>O (20:1 v/v), 600 MHz

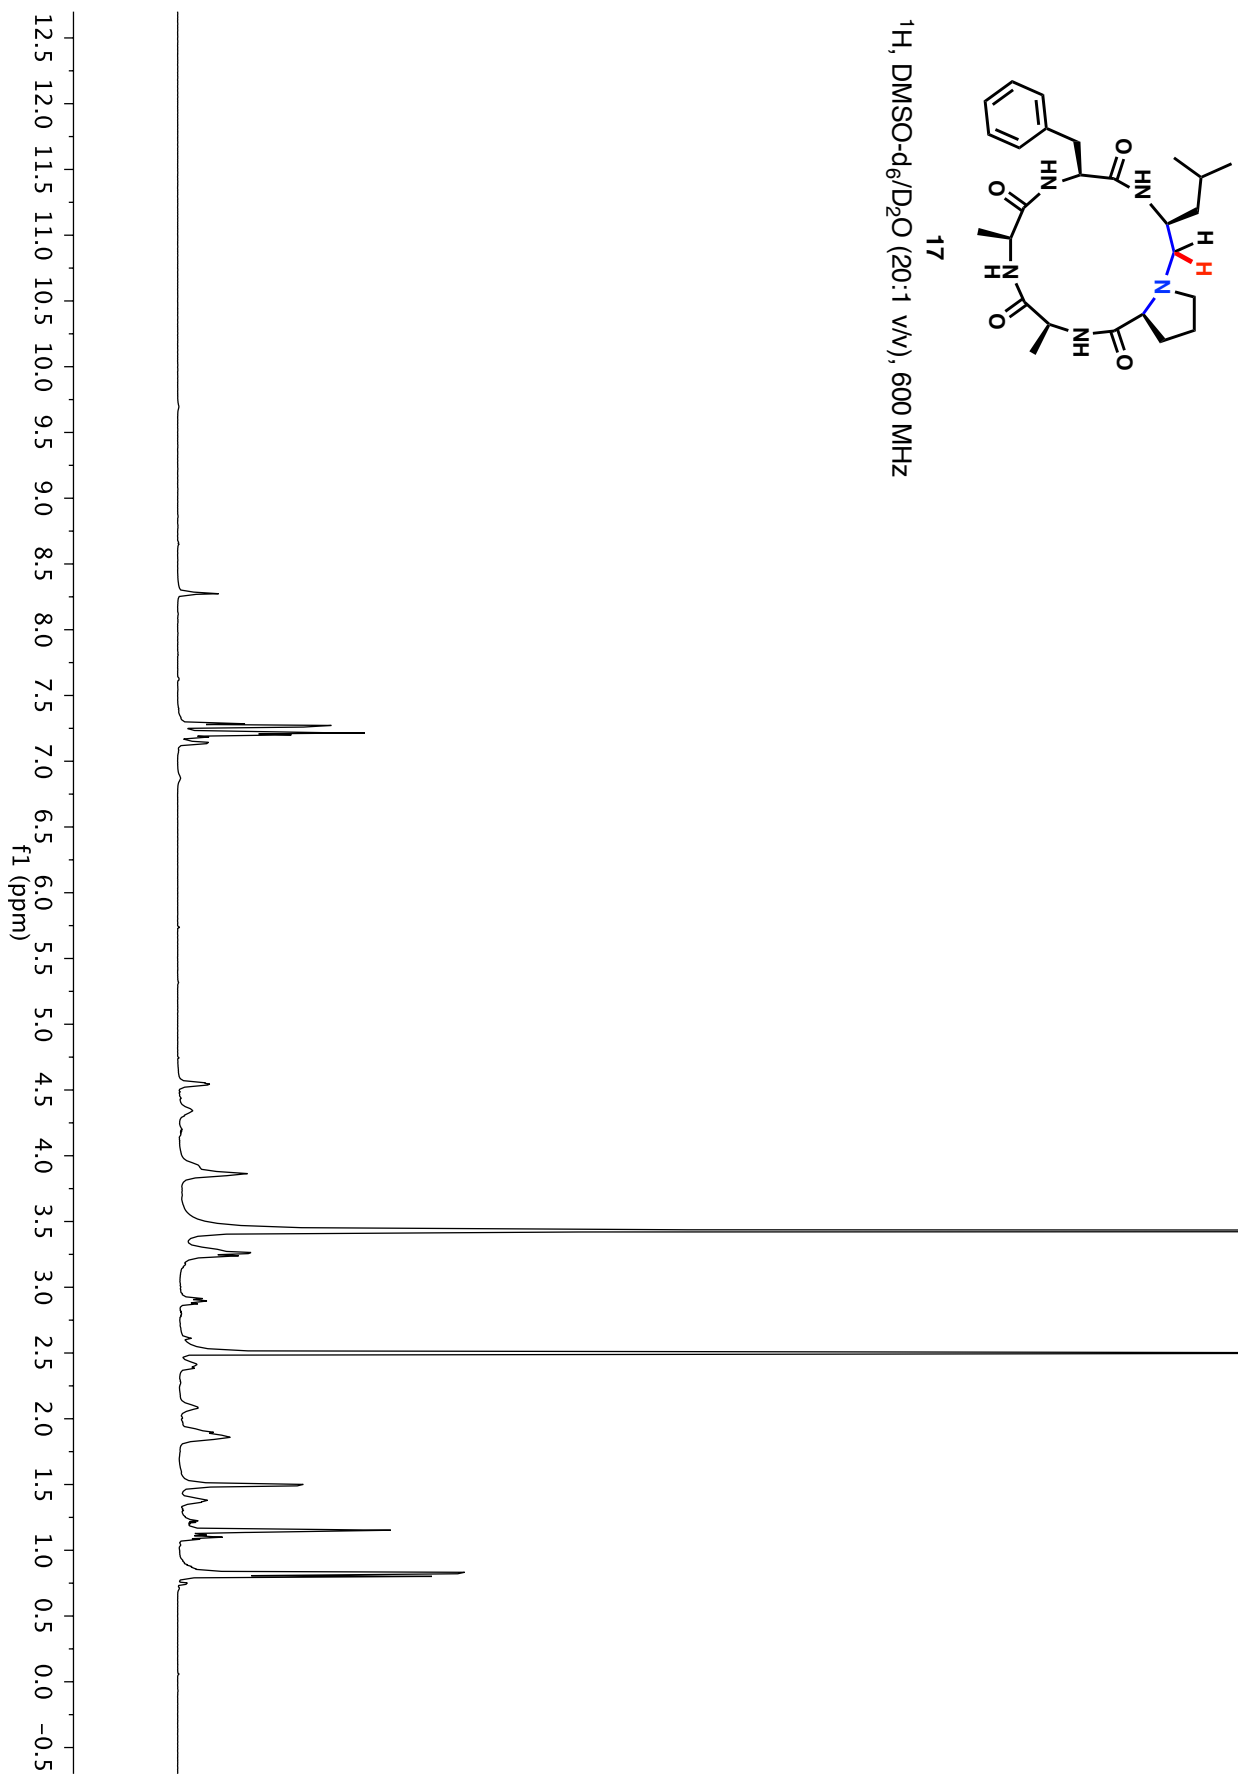

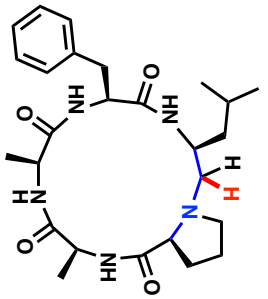

<sup>13</sup>C, DMSO-d<sub>6</sub>/D<sub>2</sub>O (20:1 v/v), 151 MHz

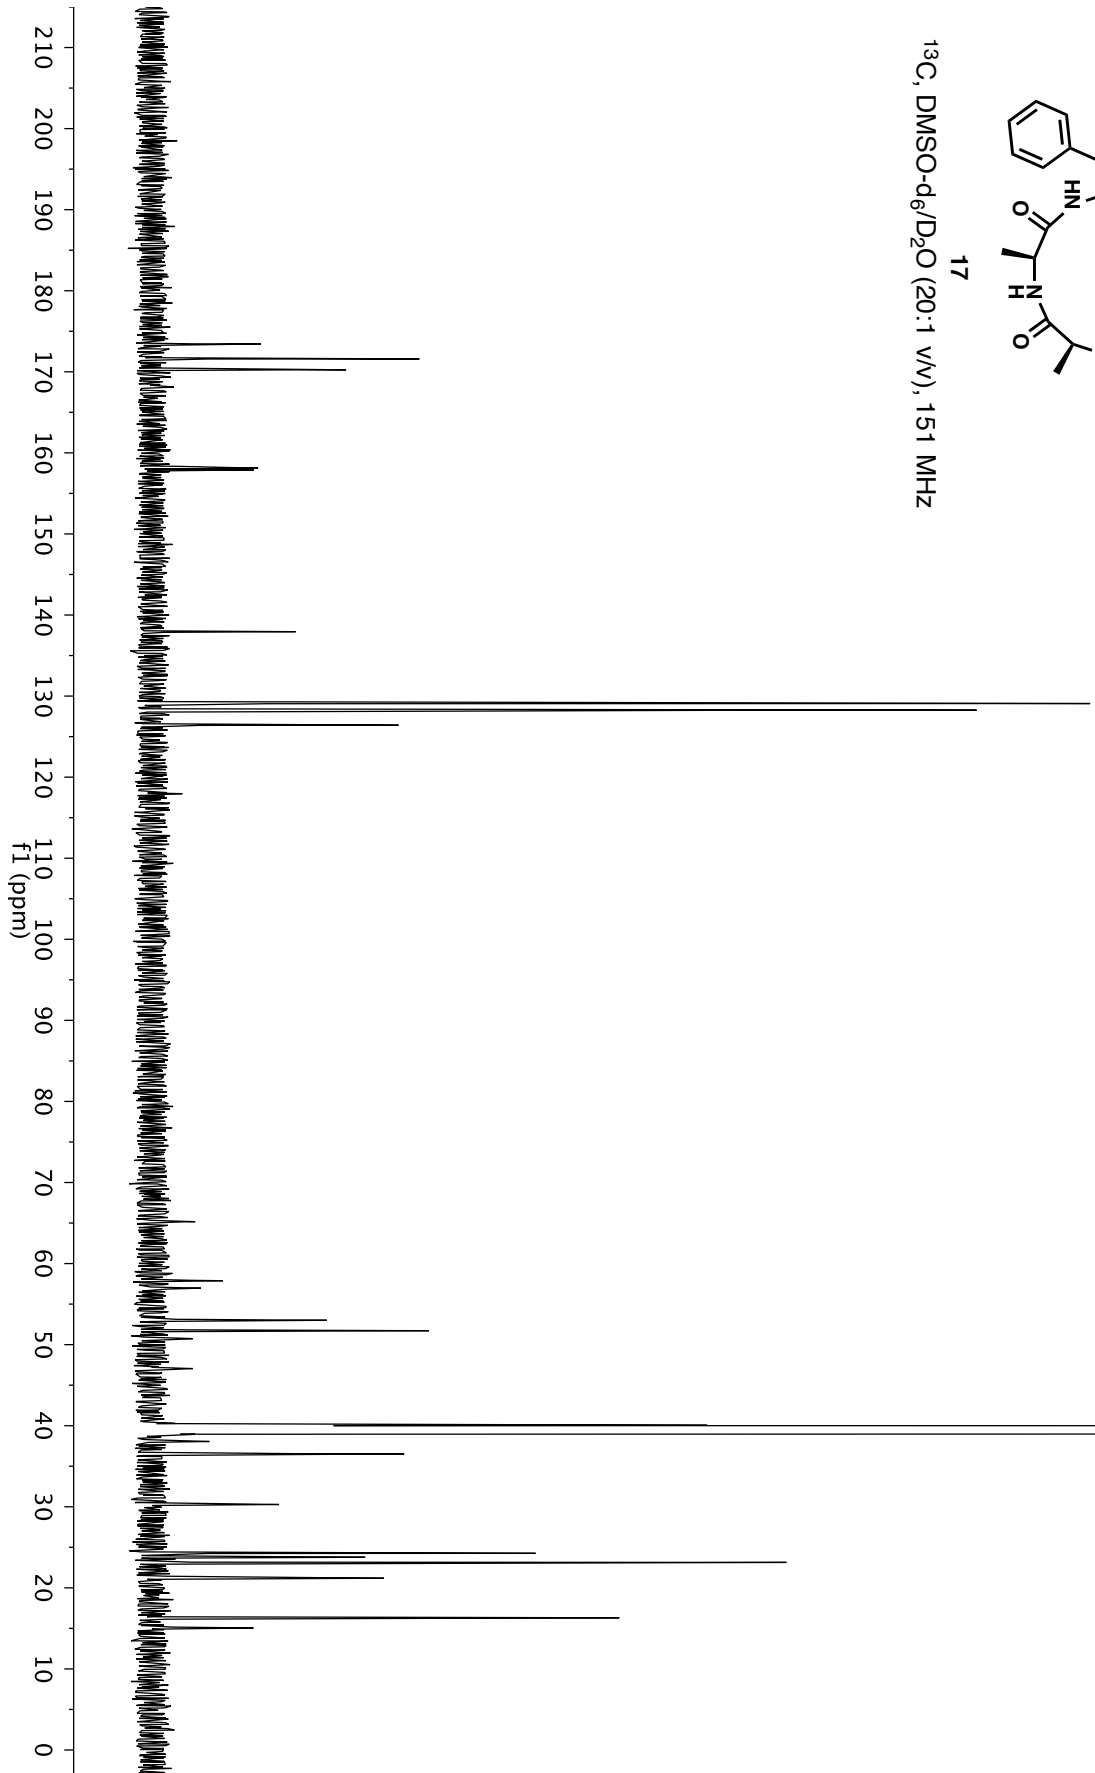

17  
COSY, DMSO-d<sub>6</sub>/D<sub>2</sub>O (20:1 v/v), 600 MHz

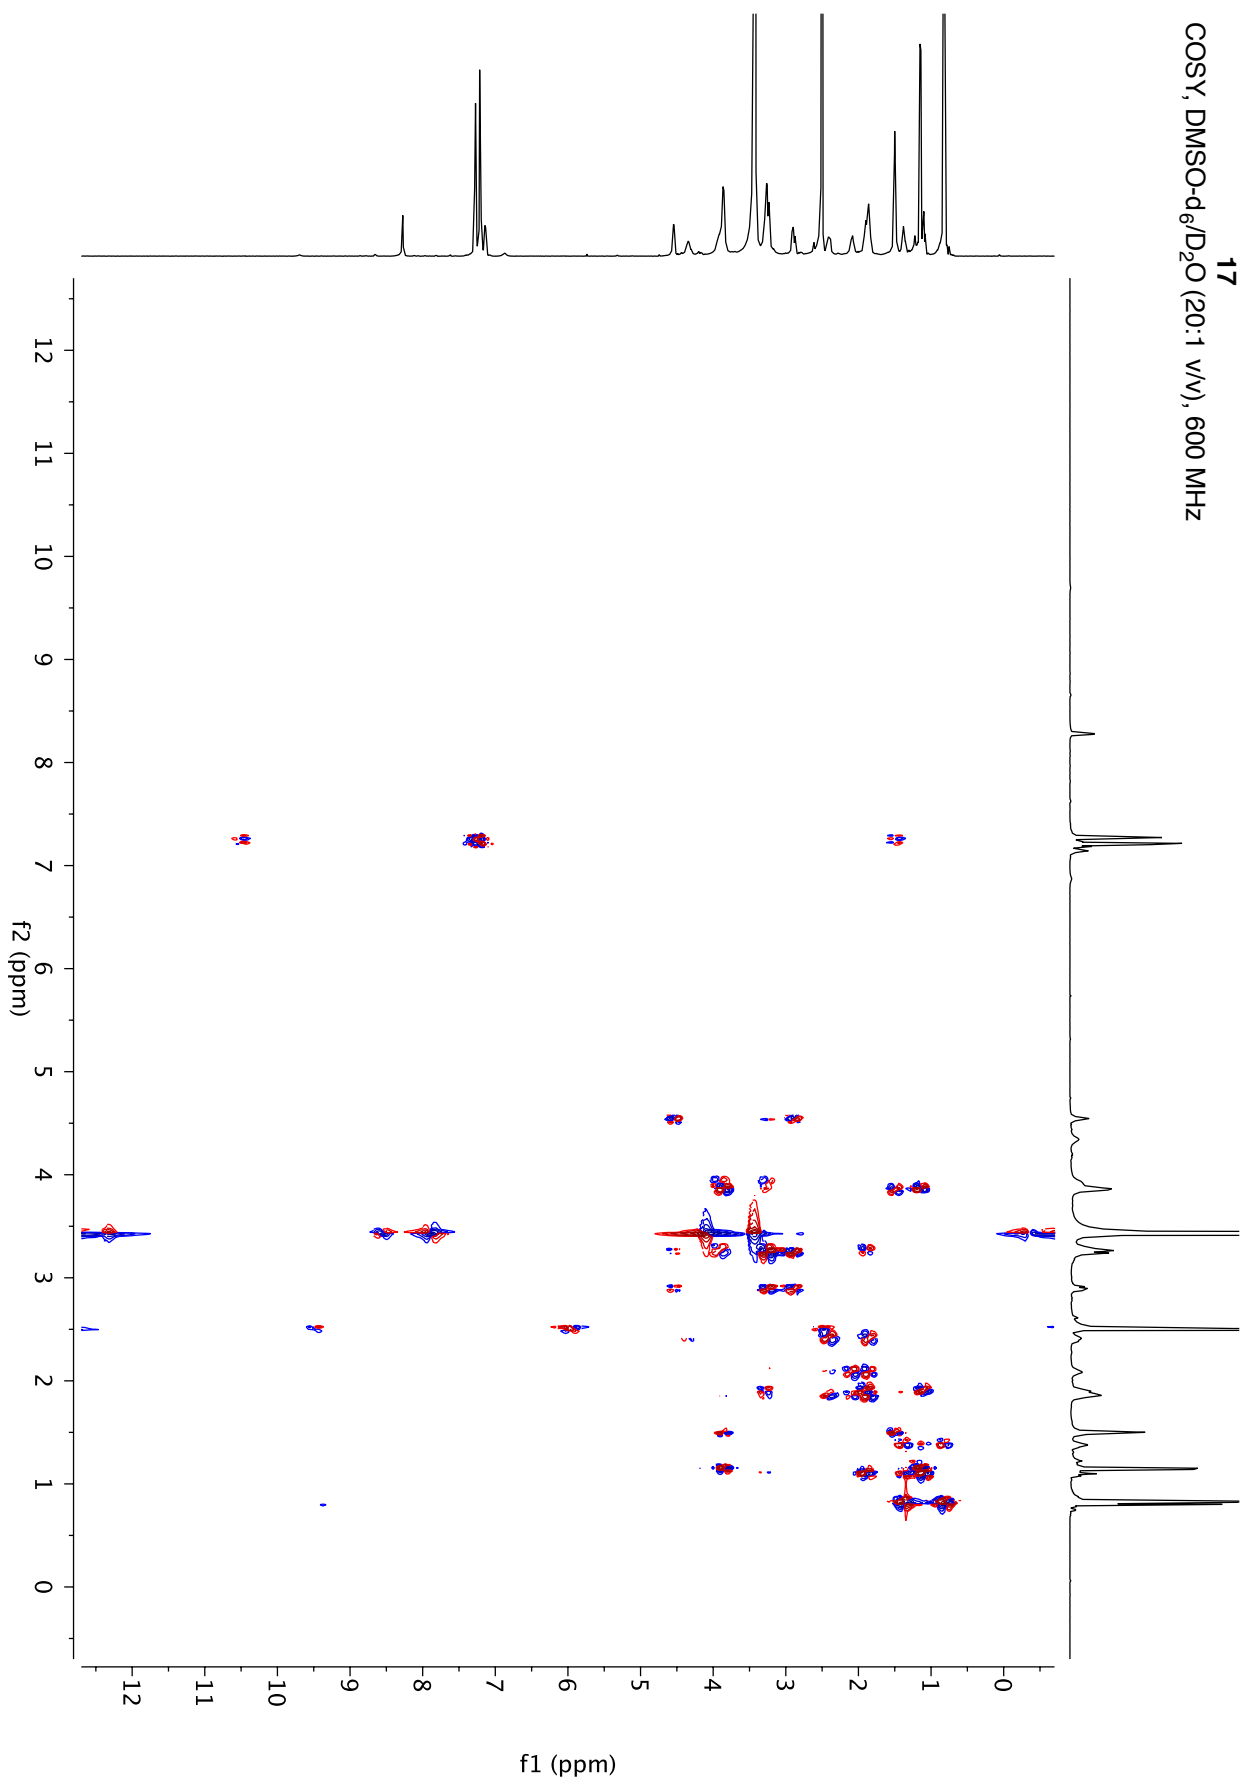



## Peptide 18

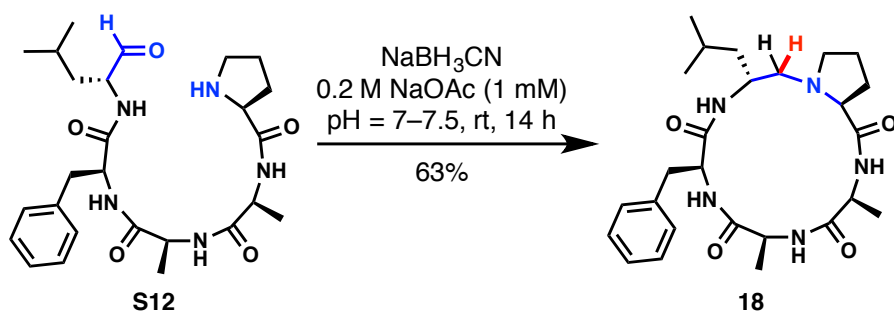

Peptide **18** was prepared according to general procedure 4 from linear amino aldehyde **S12** (6.1 mg, 12.2  $\mu\text{mol}$ ). The peptide was solubilized in 0.2 M NaOAc buffer (pH = 7–7.5). At  $t = 14$  h, the reaction was purified by preparative reverse-phase HPLC (20% B for 5 min, then 20% to 50% B over 25 min) to afford peptide macrocycle **18** (3.7 mg, 63% yield) as a white solid following lyophilization.

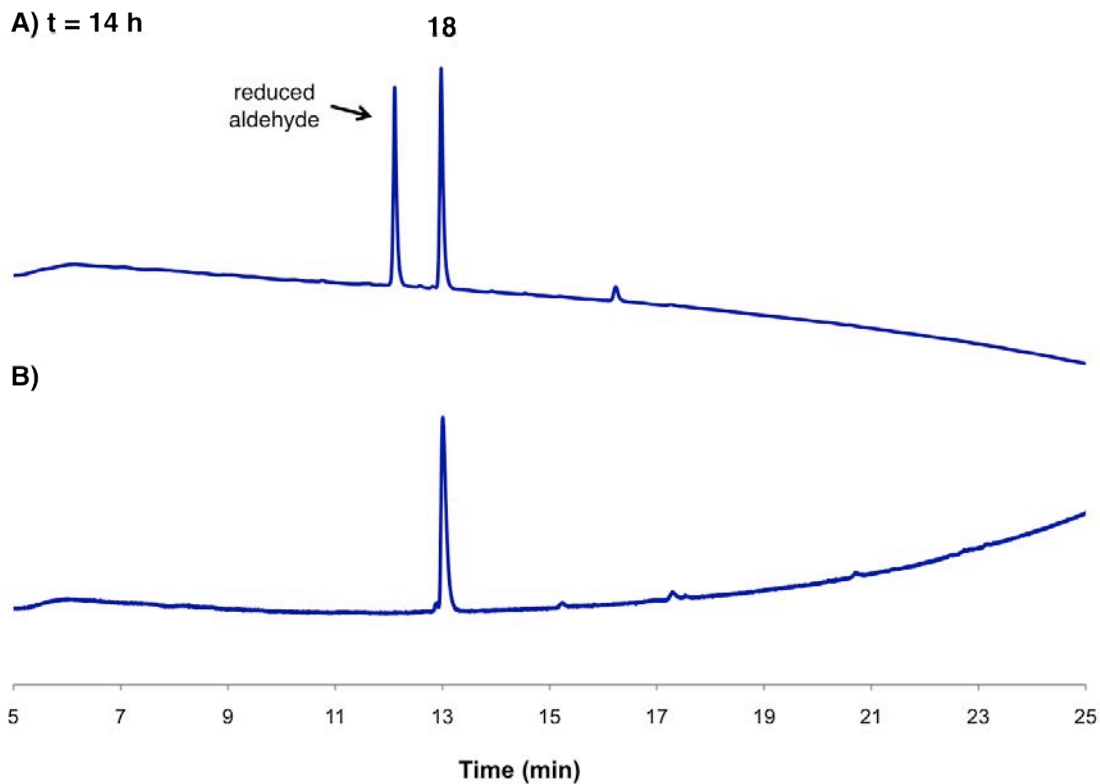

**A)** Crude analytical HPLC trace of the formation of **18** from amino aldehyde **S12** following reductive amination (5 to 100% B over 25 min,  $\lambda = 210$  nm). **B)** Purified peptide **18** ( $R_t = 13.0$  min, 5 to 100% B over 25 min,  $\lambda = 230$  nm).

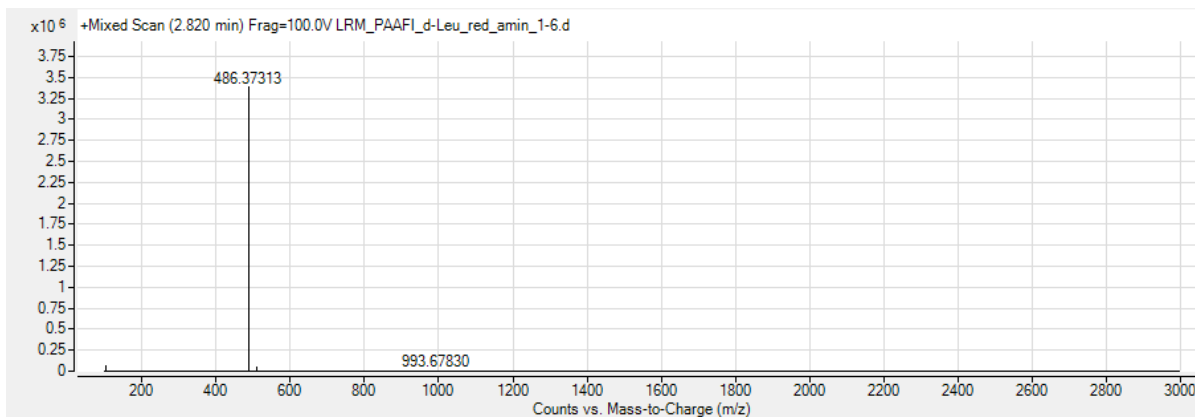

**LRMS (ESI-TOF):** calc'd for  $C_{26}H_{40}N_5O_4$   $[M+H]^+$  486.31; found 486.37.

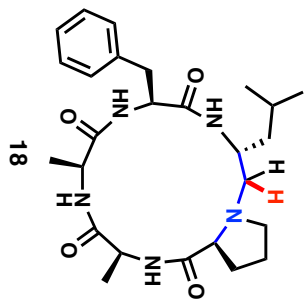

$^1\text{H}$ , DMSO- $d_6$ /D $_2$ O (20:1 v/v), 600 MHz

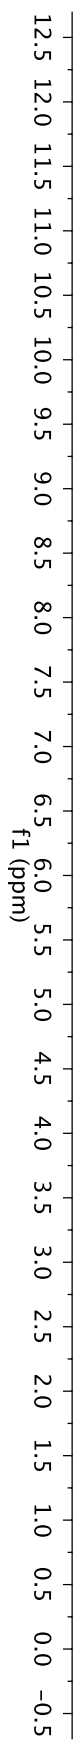

**18**  
COSY, DMSO-d<sub>6</sub>/D<sub>2</sub>O (20:1 v/v), 600 MHz

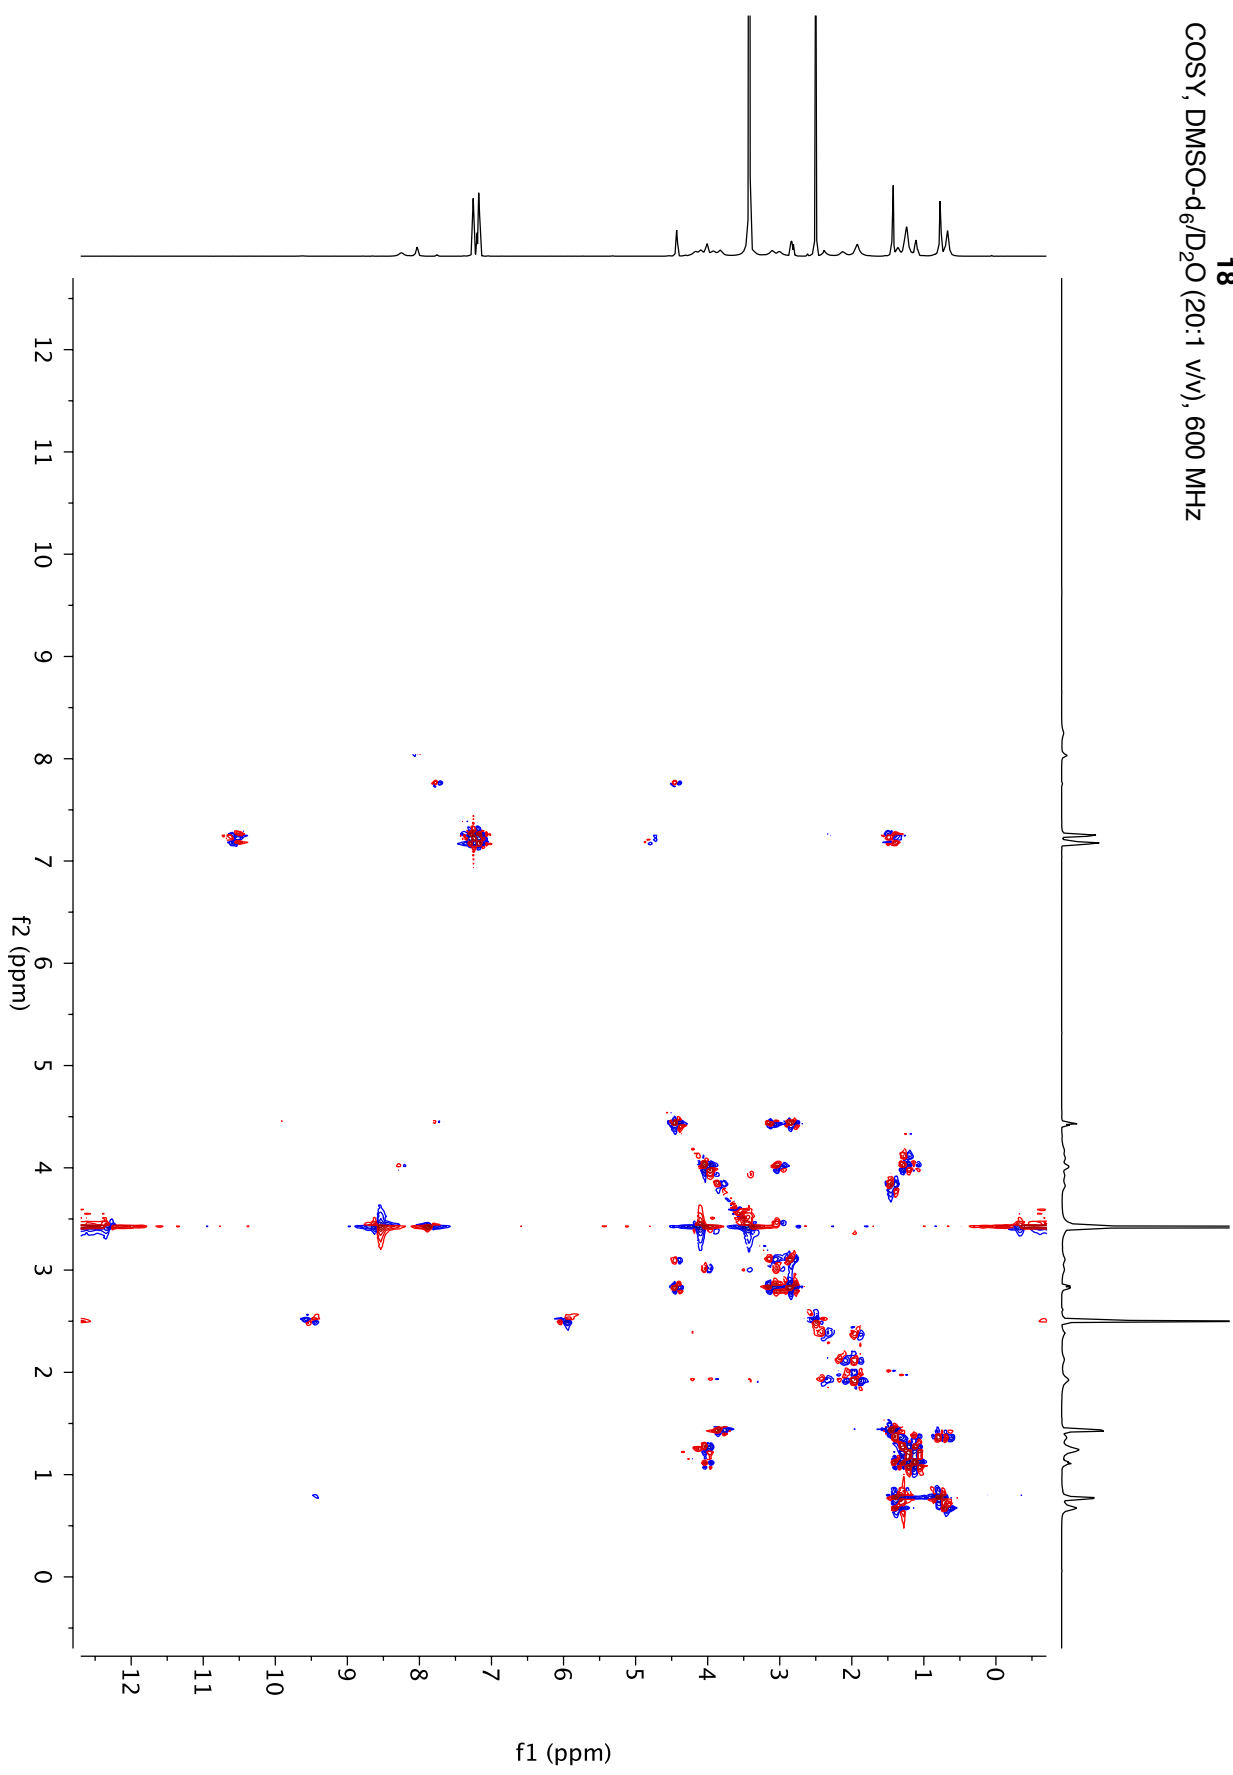

## Comparative macrocyclization: Peptide 17 and 18

A) t = 40 h

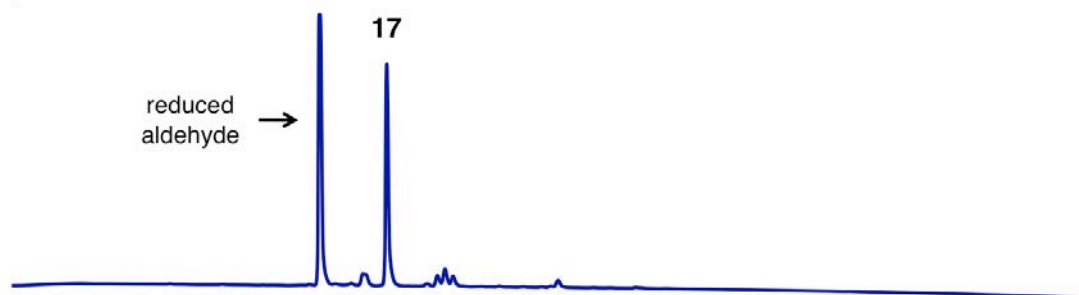

B) t = 14 h

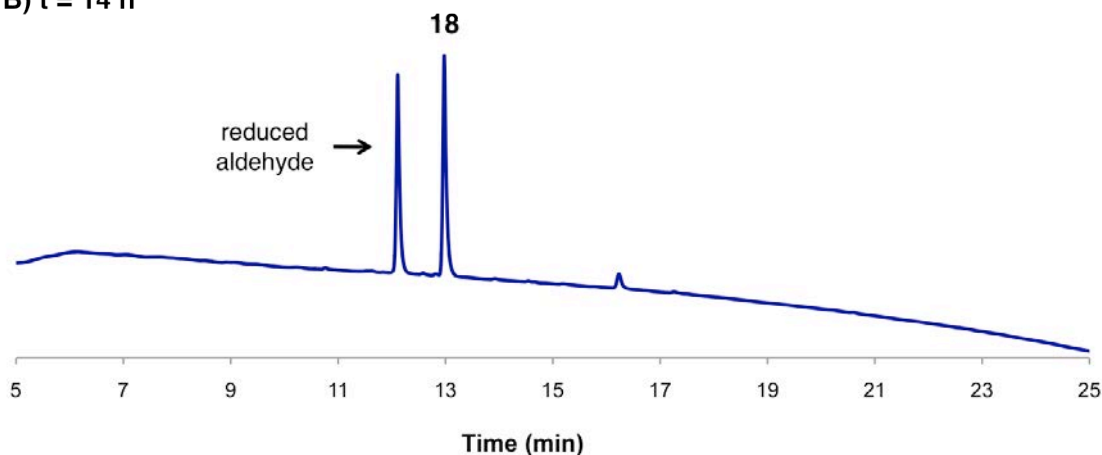

**A)** Crude analytical HPLC trace of the formation of **17** from amino aldehyde **S11** at t = 40 h (5 to 100% B over 25 min,  $\lambda = 210$  nm). **B)** Crude analytical HPLC trace of the formation of **18** from amino aldehyde **S12** at t = 14 h (5 to 100% B over 25 min,  $\lambda = 210$  nm).

Note the enhanced rate of reaction for peptide **S12**, bearing a D-Leu aldehyde as the C-terminal residue. Based on HPLC analysis, the slower macrocyclization (**S11** to **17**) was also more prone to aldehyde reduction, cyanohydrin formation and dimerization (see minor byproducts in figure A, above). Based on retention time, a small amount of linear **S11** may have epimerized at the C-terminal aldehyde to afford macrocycle **18**. However, this potential byproduct was not substantial enough to be isolated for analysis following HPLC purification.

## Characterization Data for Internal Lysine Studies

### Peptide 19

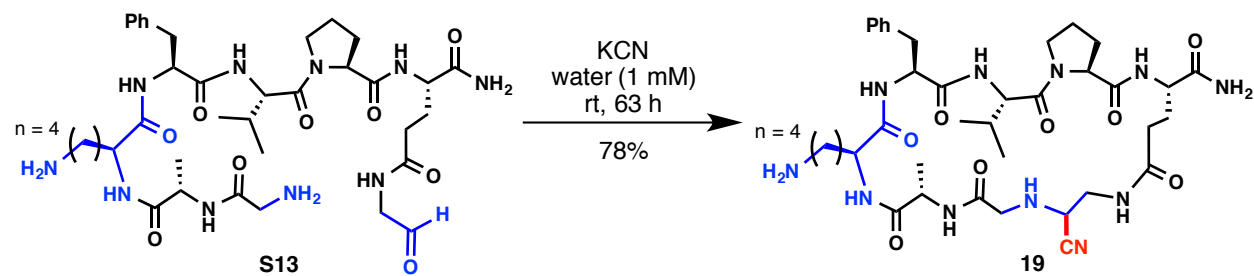

Peptide **19** was prepared according to general procedure 3 from linear amino aldehyde **S13** (5.1 mg, 6.5  $\mu\text{mol}$ ). At  $t = 63$  h, the reaction was purified by preparative reverse-phase HPLC (10% B for 5 min, then 10% to 45% B over 30 min) to afford peptide macrocycle **19** (4.0 mg, 78% yield) as a mixture of diastereomers and as a white solid following lyophilization.

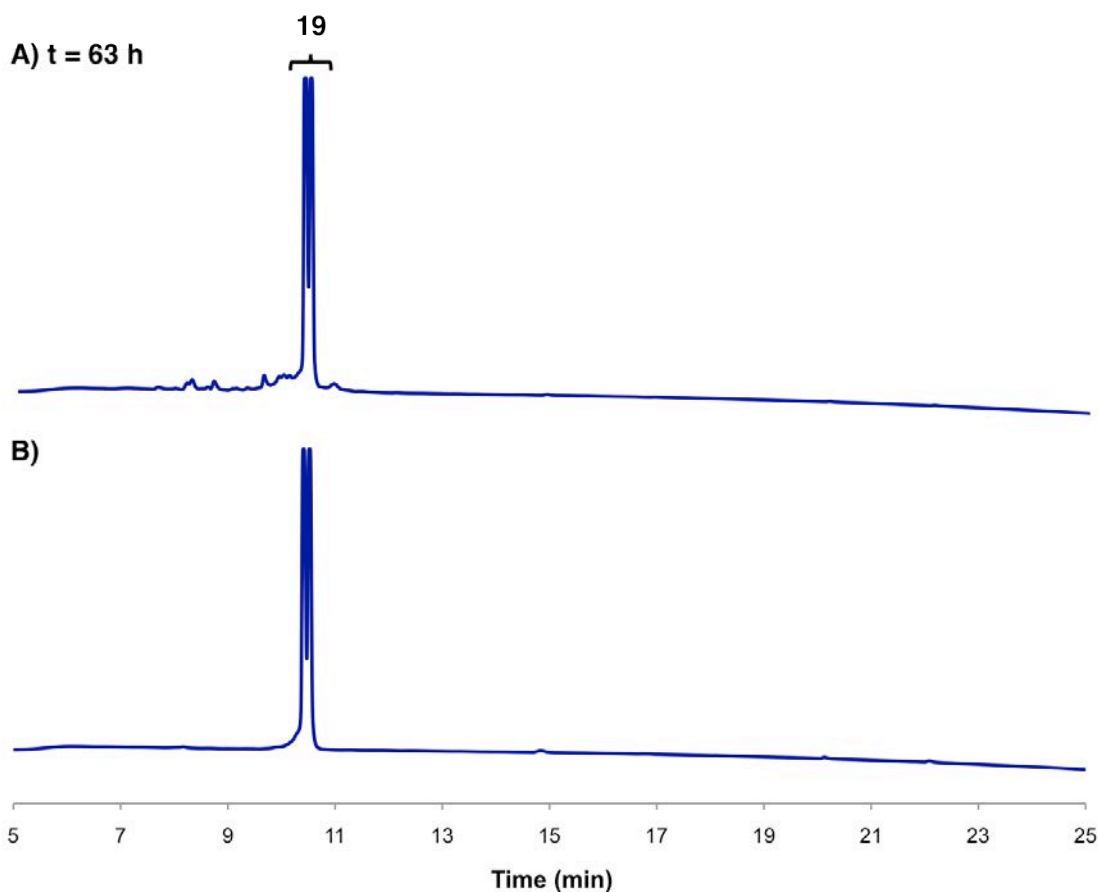

**A)** Crude analytical HPLC trace of the formation of **19** from amino aldehyde **S13** following Strecker macrocyclization (5 to 100% B over 25 min,  $\lambda = 210$  nm). **B)** Purified peptide **19** ( $R_t = 10.4, 10.5$  min, 5 to 100% B over 25 min,  $\lambda = 210$  nm).

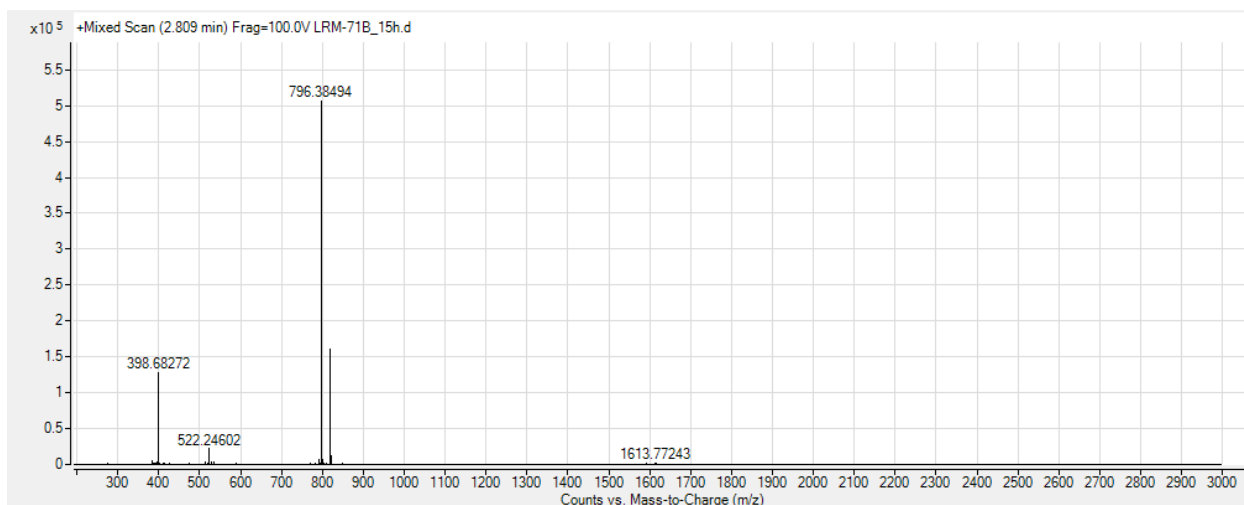

**LRMS (ESI-TOF):** calc'd for  $C_{38}H_{58}N_{11}O_8$   $[M+H]^+$  796.45; found 796.38.

**Partial 2D NMR Correlations:**

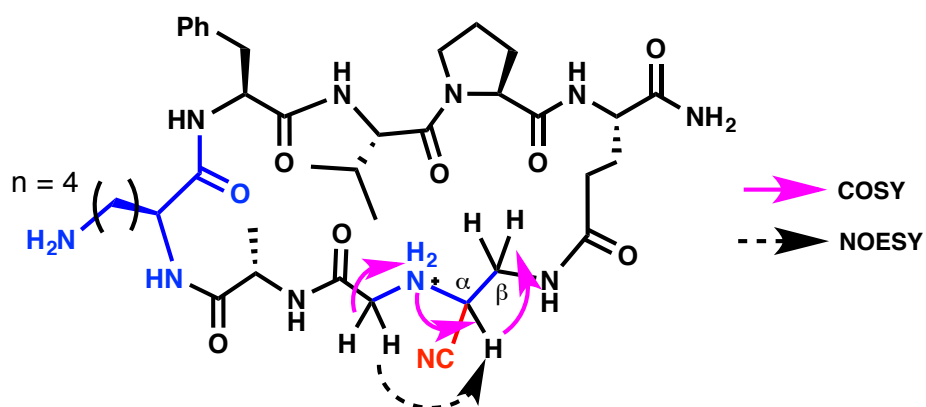

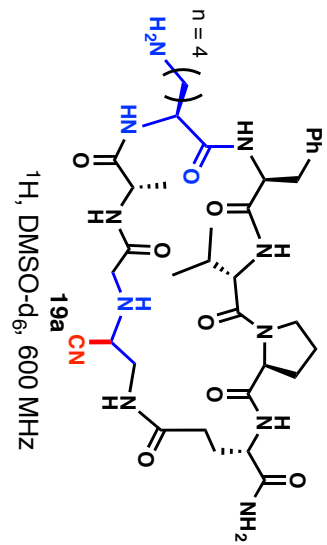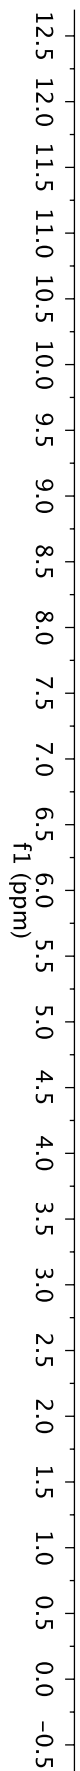



**19a**  
COSY, DMSO-d<sub>6</sub>, 600 MHz

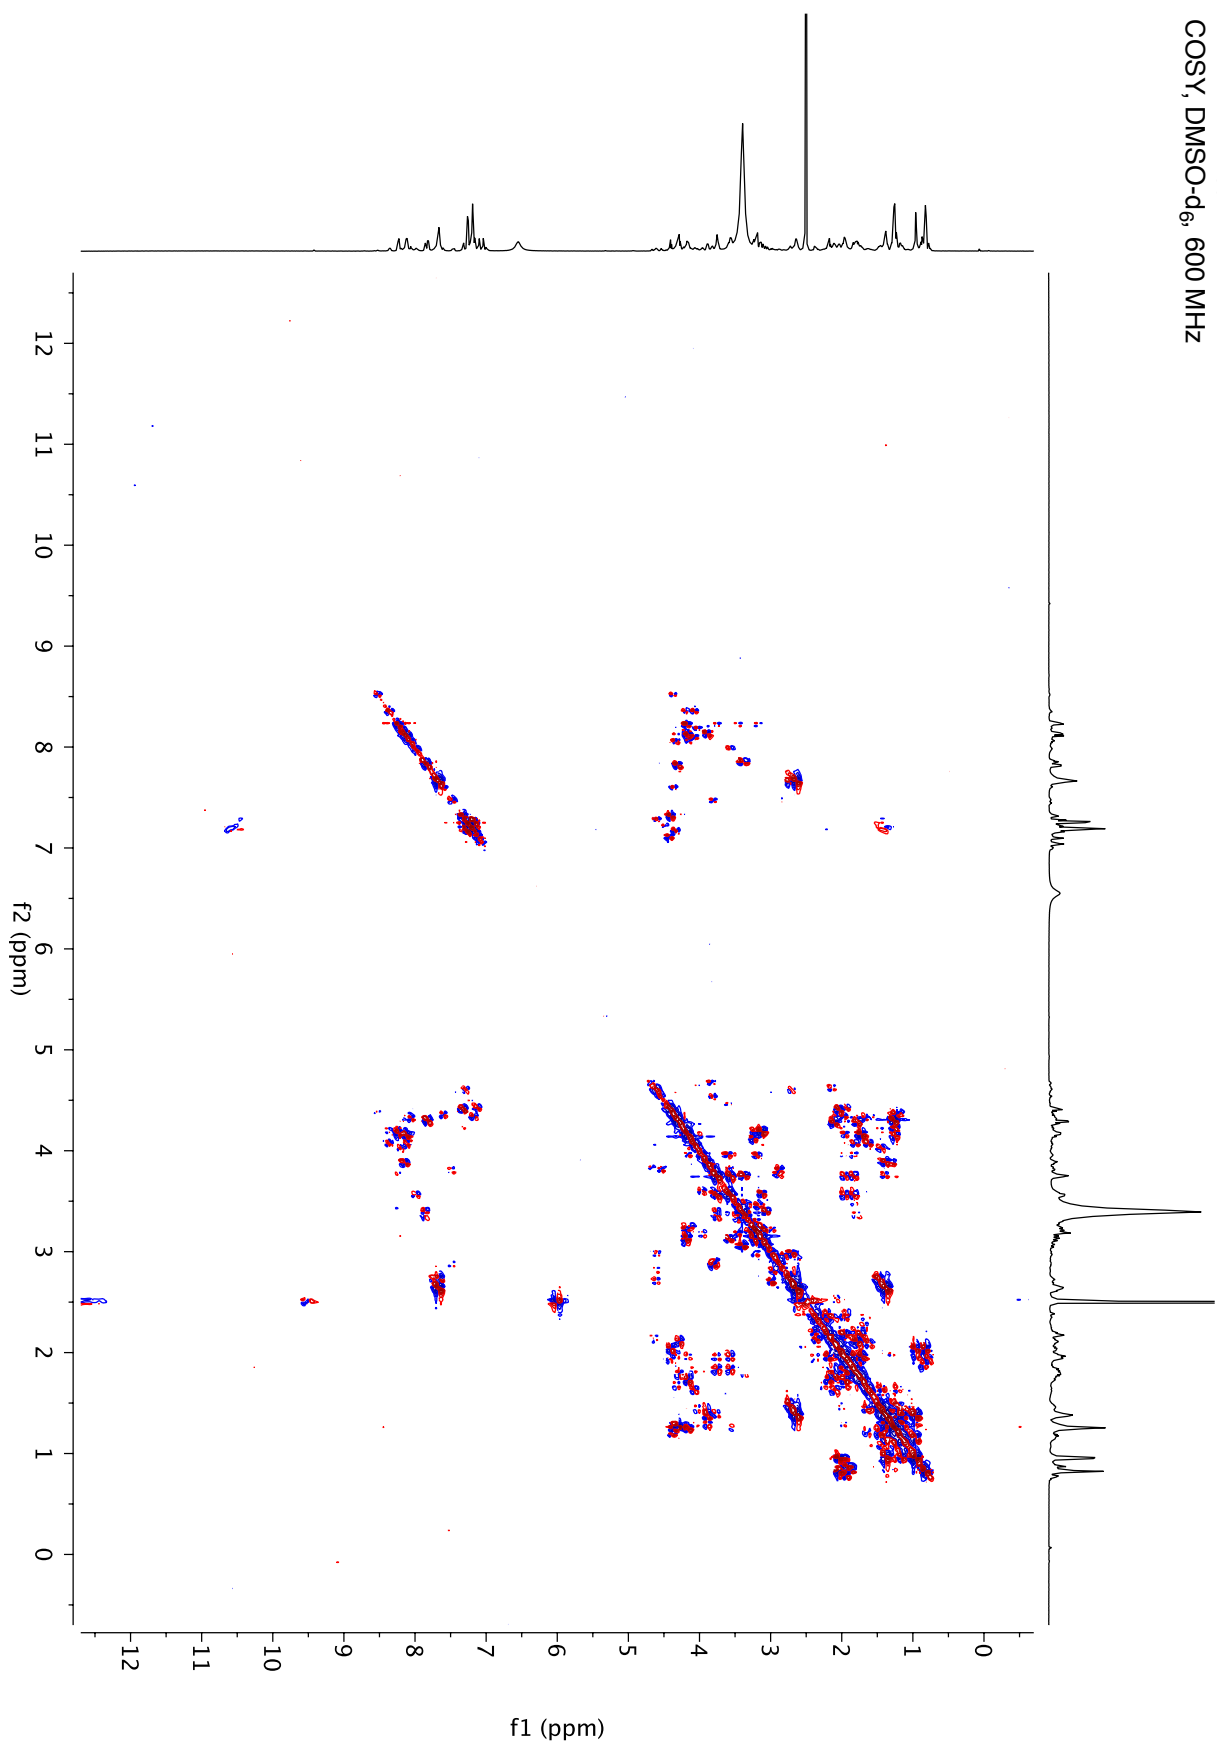

**19a**  
COSY, DMSO-d<sub>6</sub>, 600 MHz

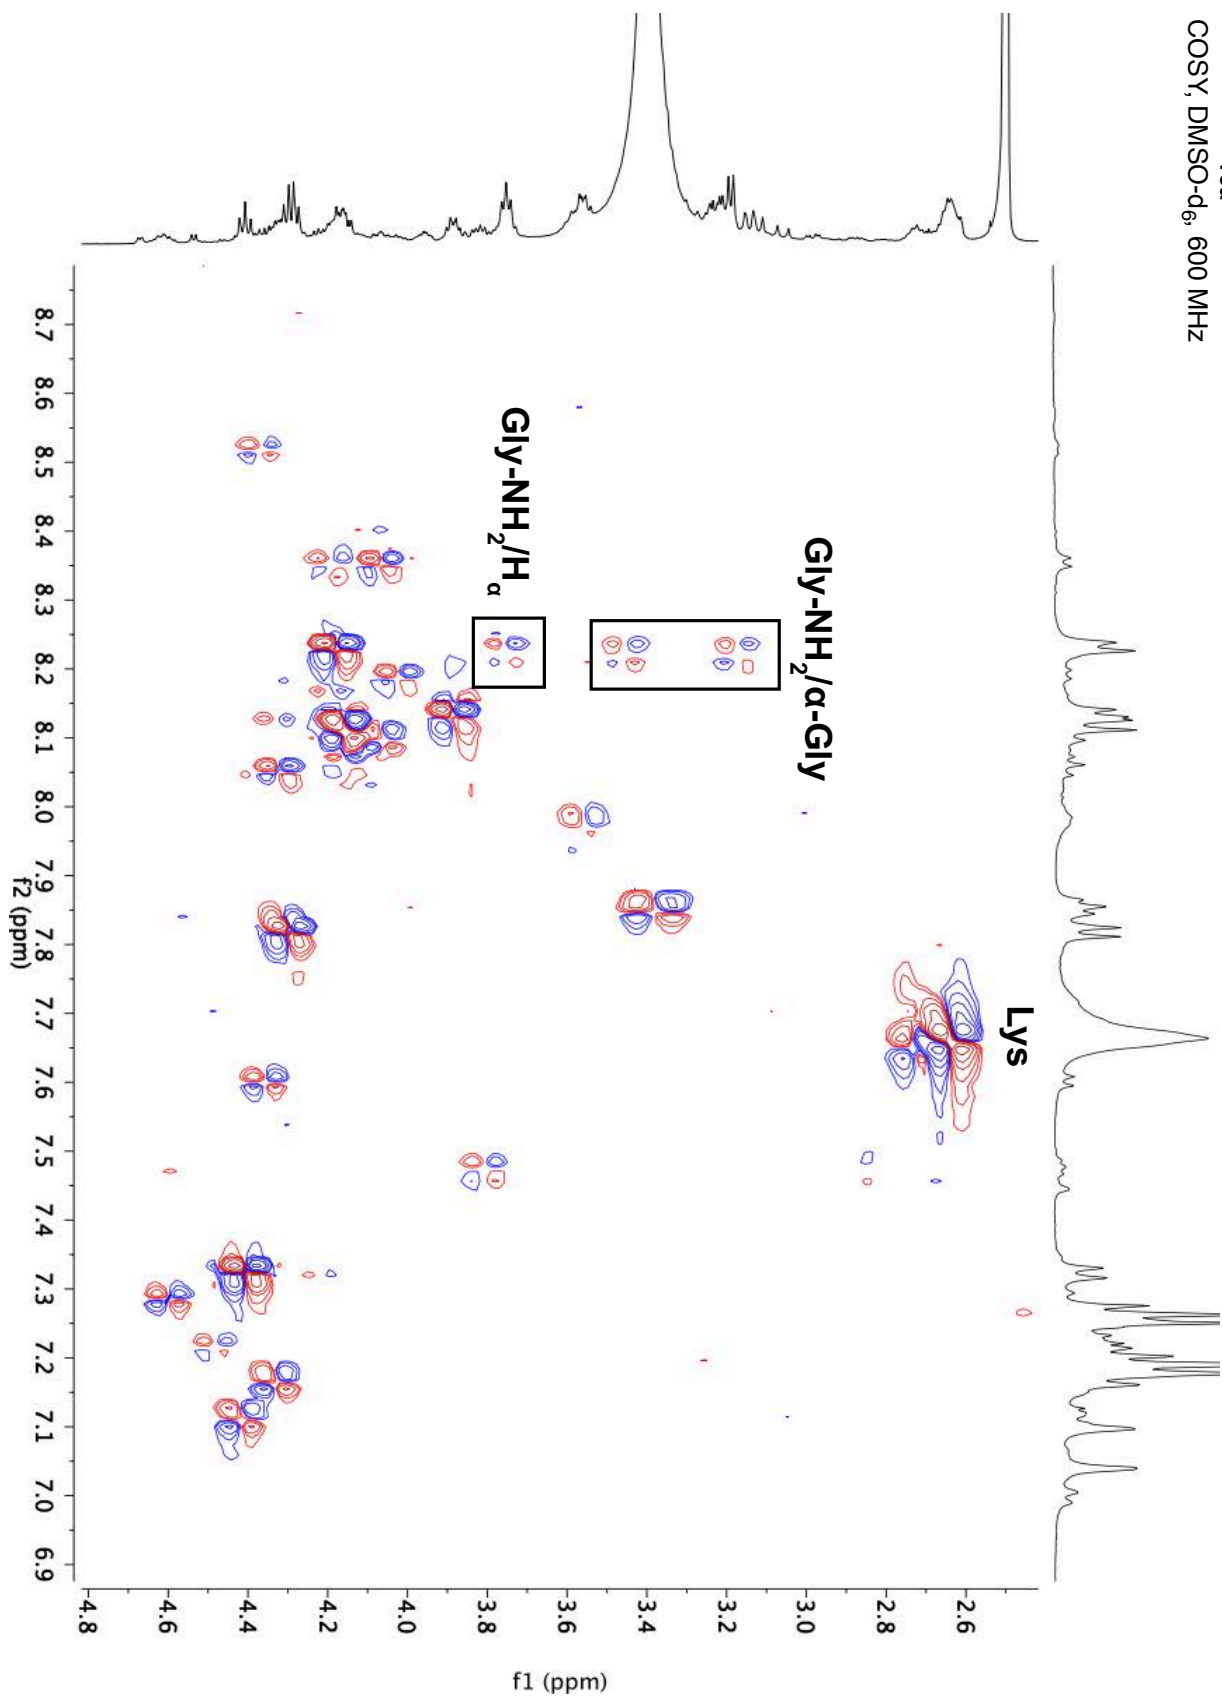

**19a**  
NOESY, DMSO-d<sub>6</sub>/D<sub>2</sub>O (20:1 v/v), 600 MHz

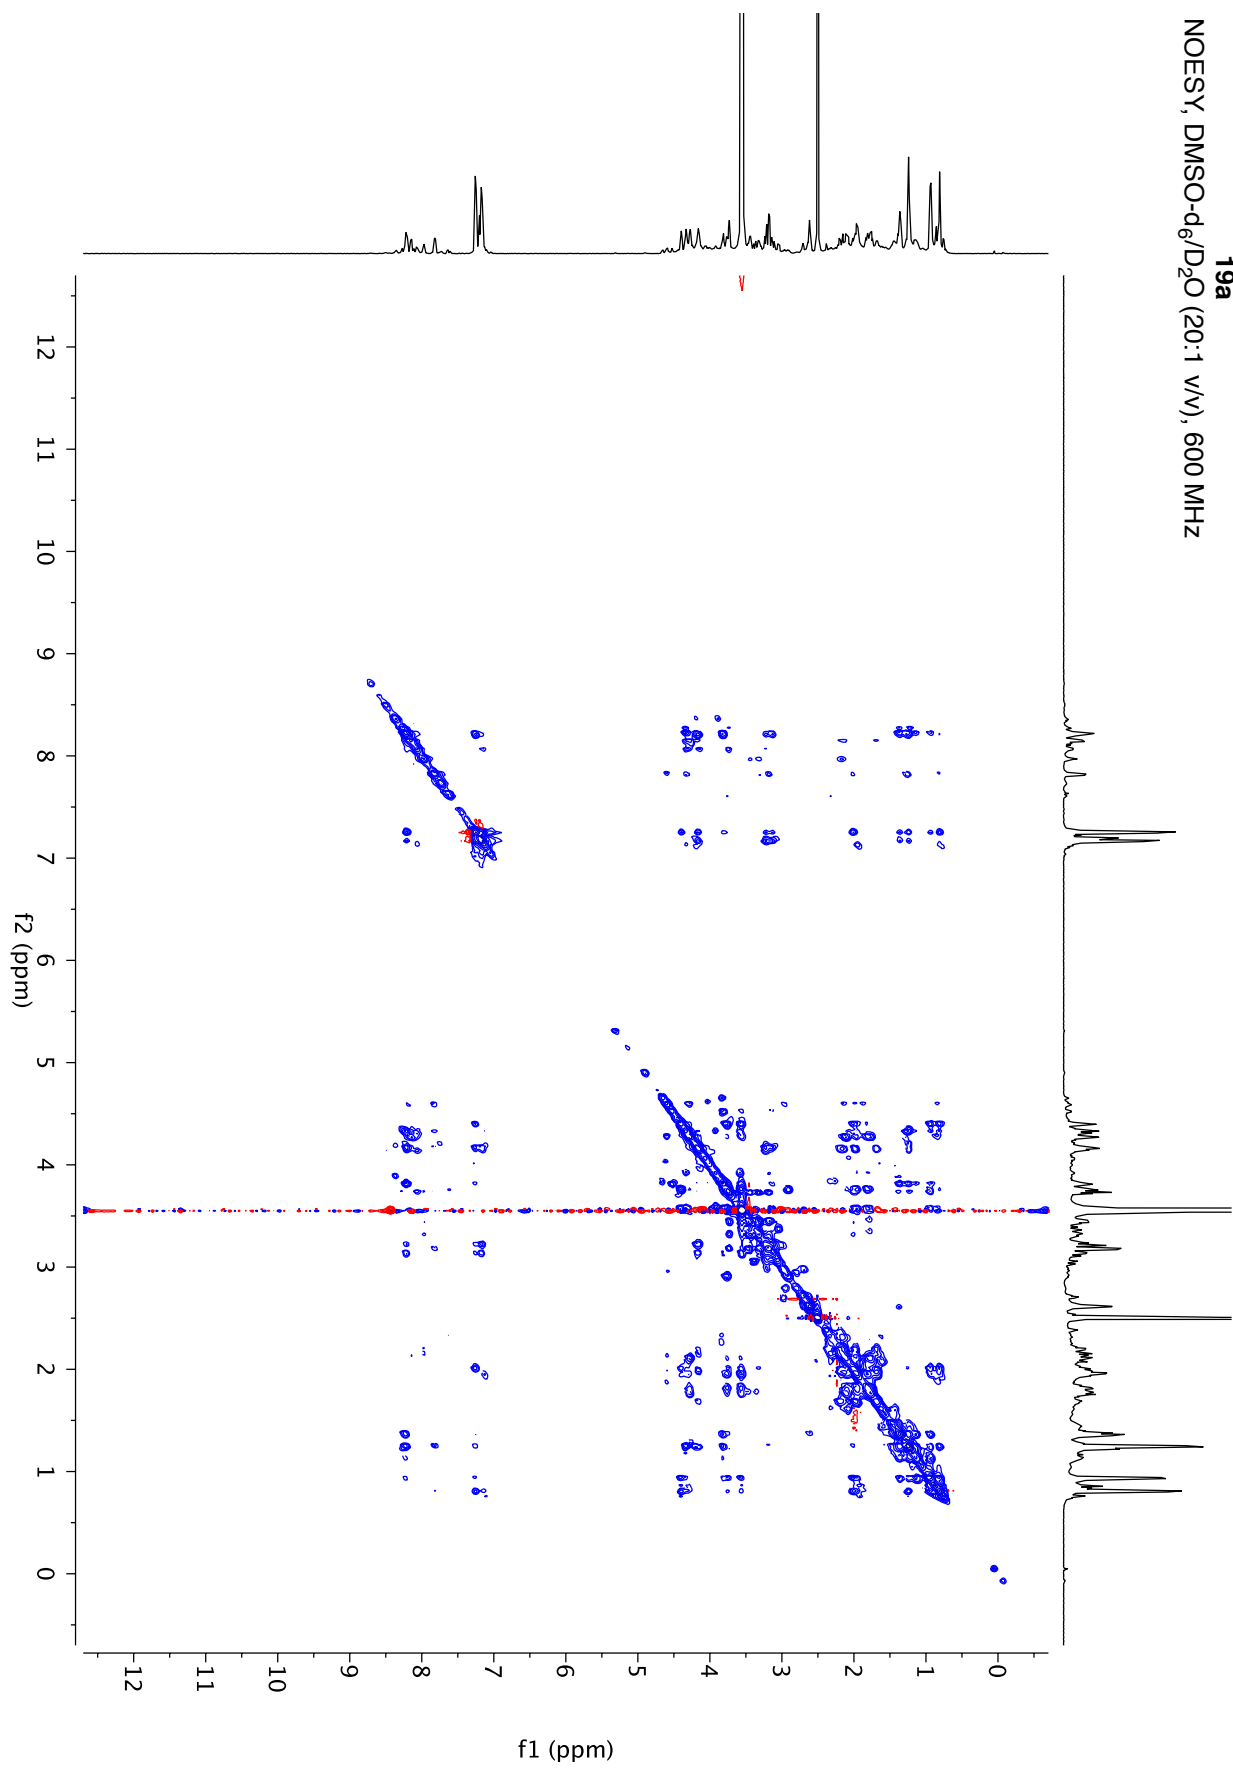

**19a**  
NOESY, DMSO-d<sub>6</sub>/D<sub>2</sub>O (20:1 v/v), 600 MHz

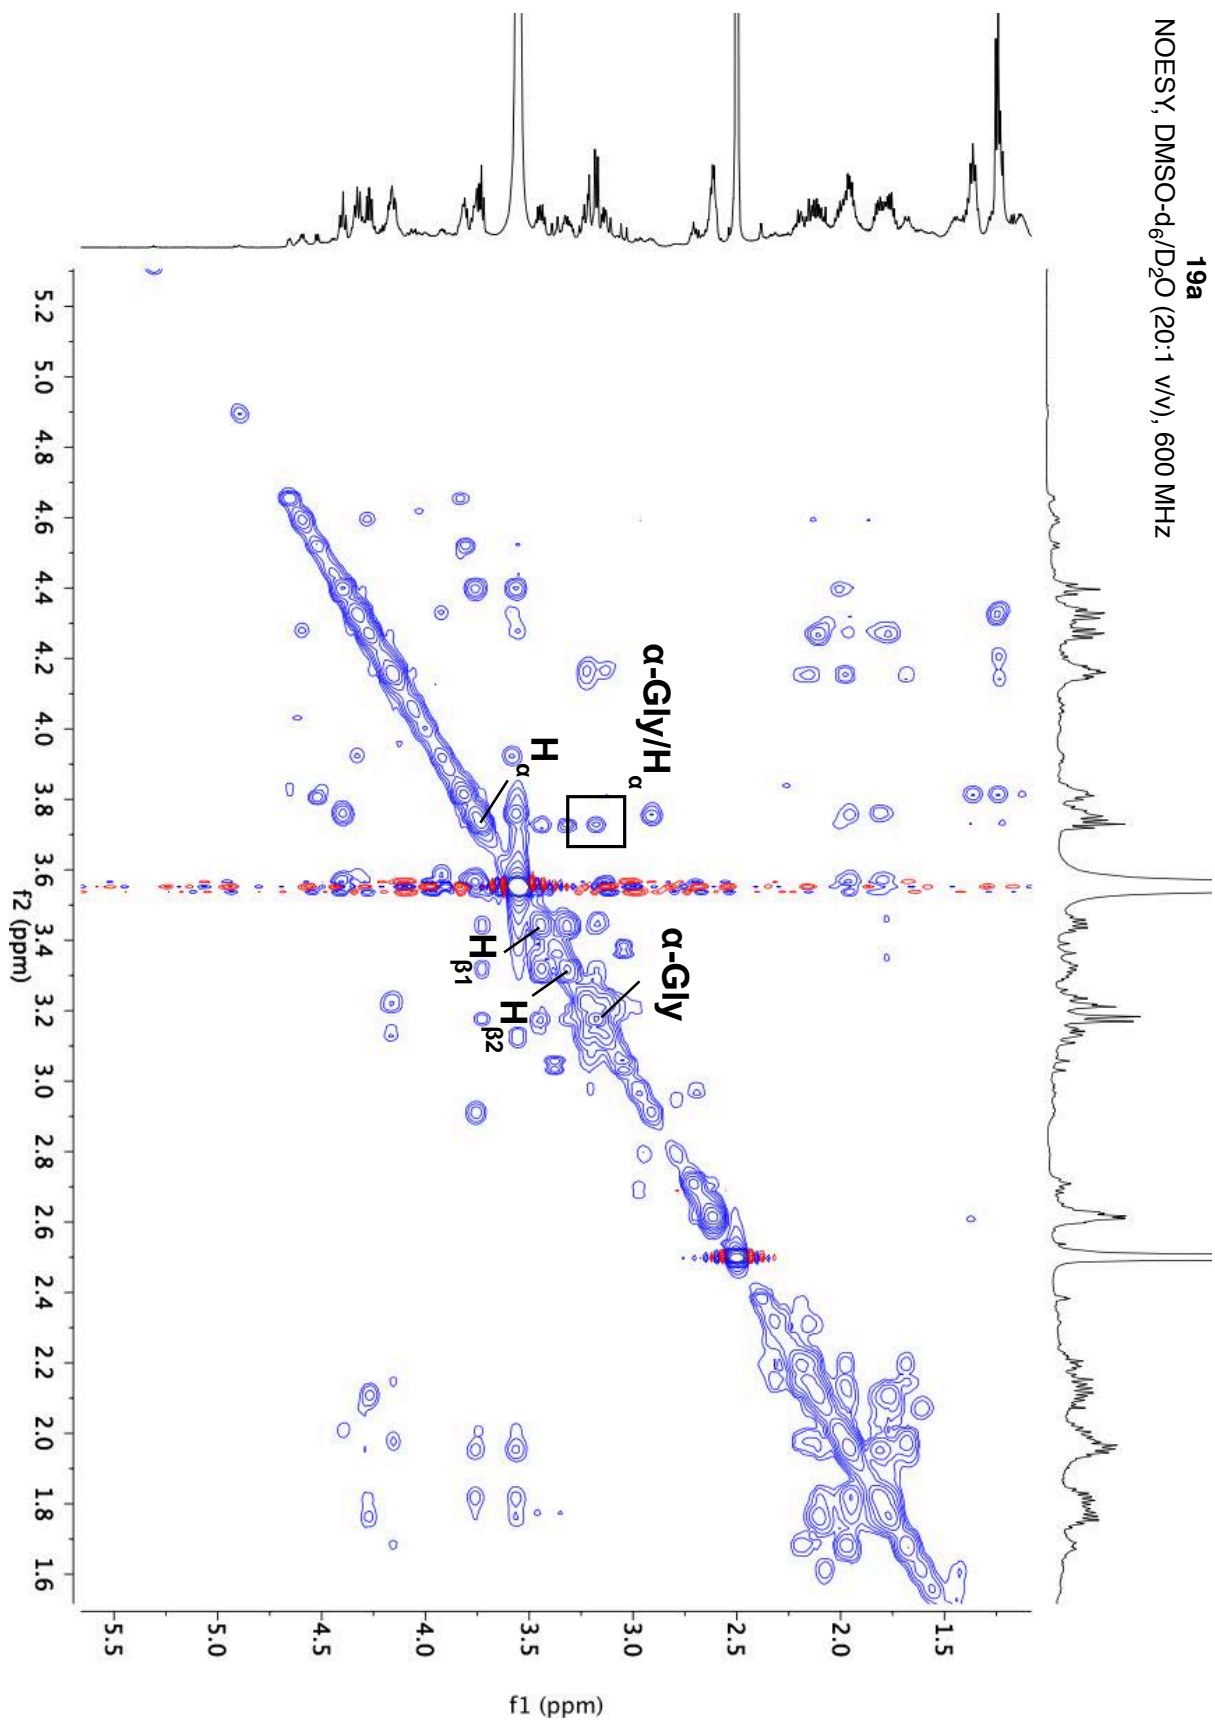

## Peptide 20

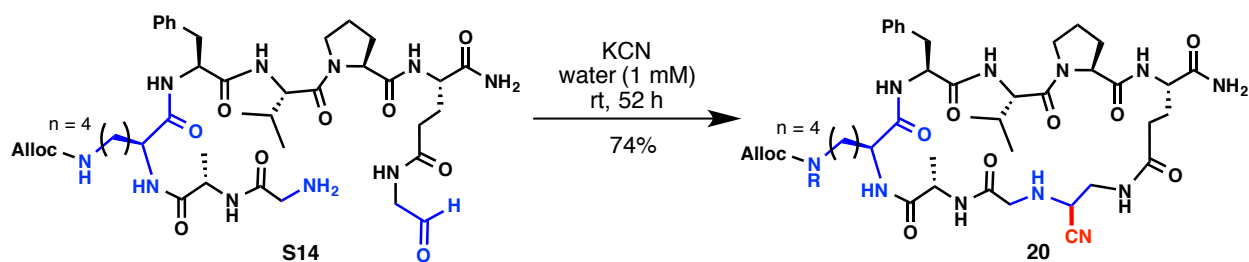

Peptide **20** was prepared according to general procedure 3 from linear amino aldehyde **S14** (3.9 mg, 4.5  $\mu$ mol). At  $t = 52$  h, the reaction was purified by preparative reverse-phase HPLC (25% B for 5 min, then 25% to 60% B over 30 min) to afford peptide macrocycle **20** (2.9 mg, 74% yield) as a mixture of diastereomers and as a white solid following lyophilization.

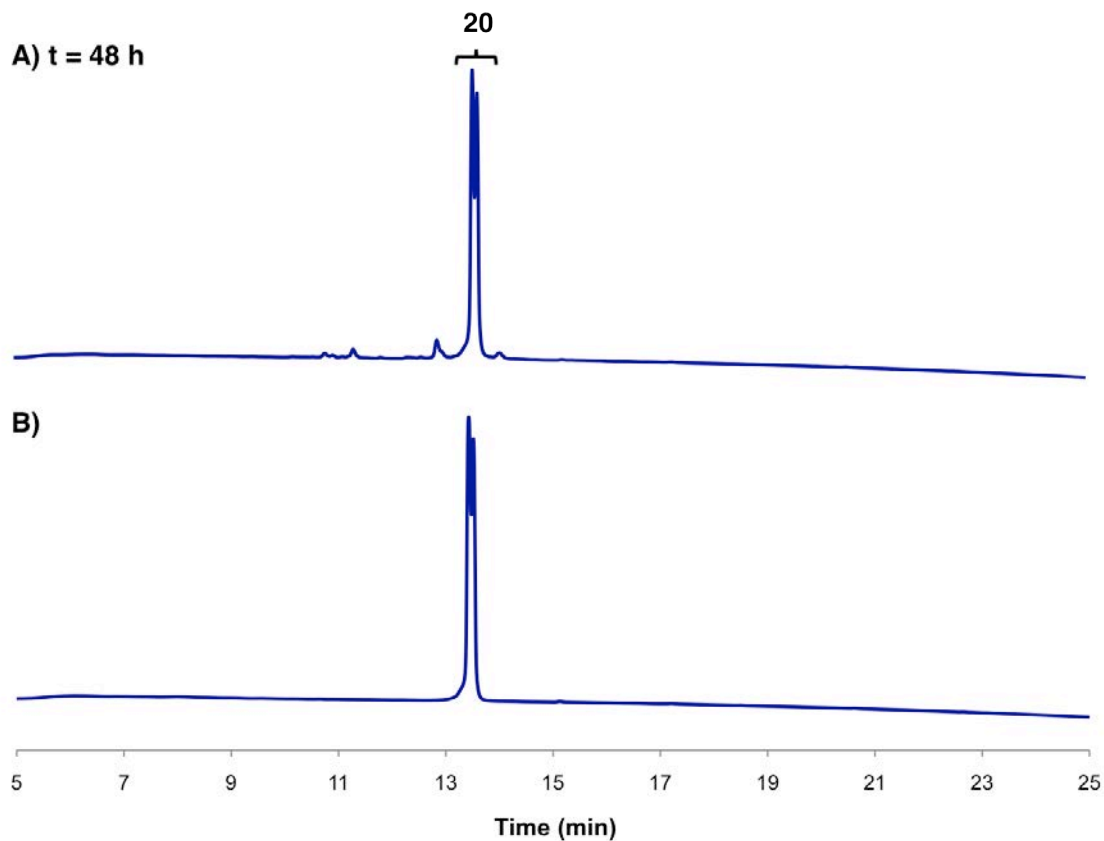

**A)** Crude analytical HPLC trace of the formation of **20** from amino aldehyde **S14** following Strecker macrocyclization (5 to 100% B over 25 min,  $\lambda = 210$  nm). **B)** Purified peptide **20** (Rt = 13.4, 13.5 min, 5 to 100% B over 25 min,  $\lambda = 210$  nm).

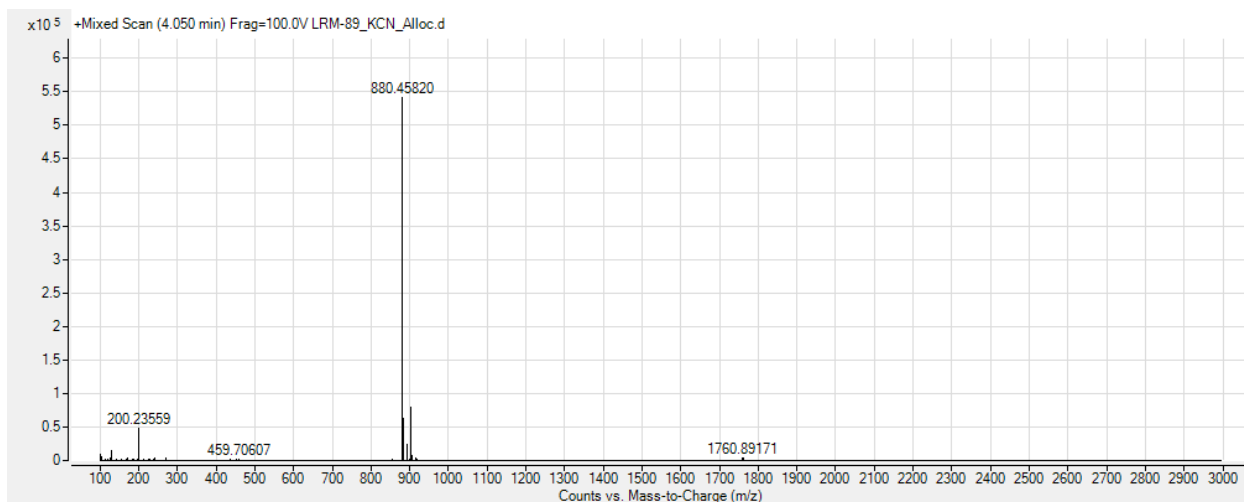

**LRMS (ESI-TOF):** calc'd for C<sub>42</sub>H<sub>62</sub>N<sub>11</sub>O<sub>10</sub> [M+H]<sup>+</sup> 880.47; found 880.46.

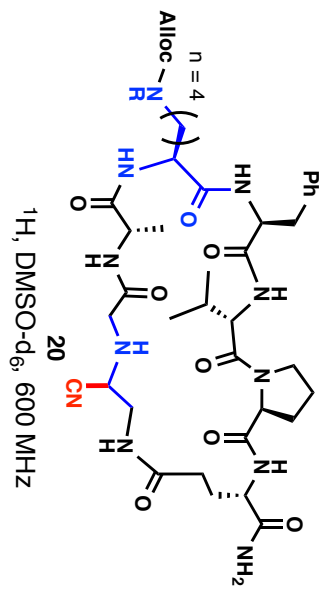

<sup>1</sup>H, DMSO-d<sub>6</sub>, 600 MHz

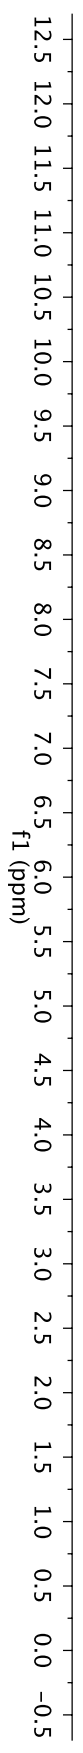

20  
COSY, DMSO-d<sub>6</sub>, 600 MHz

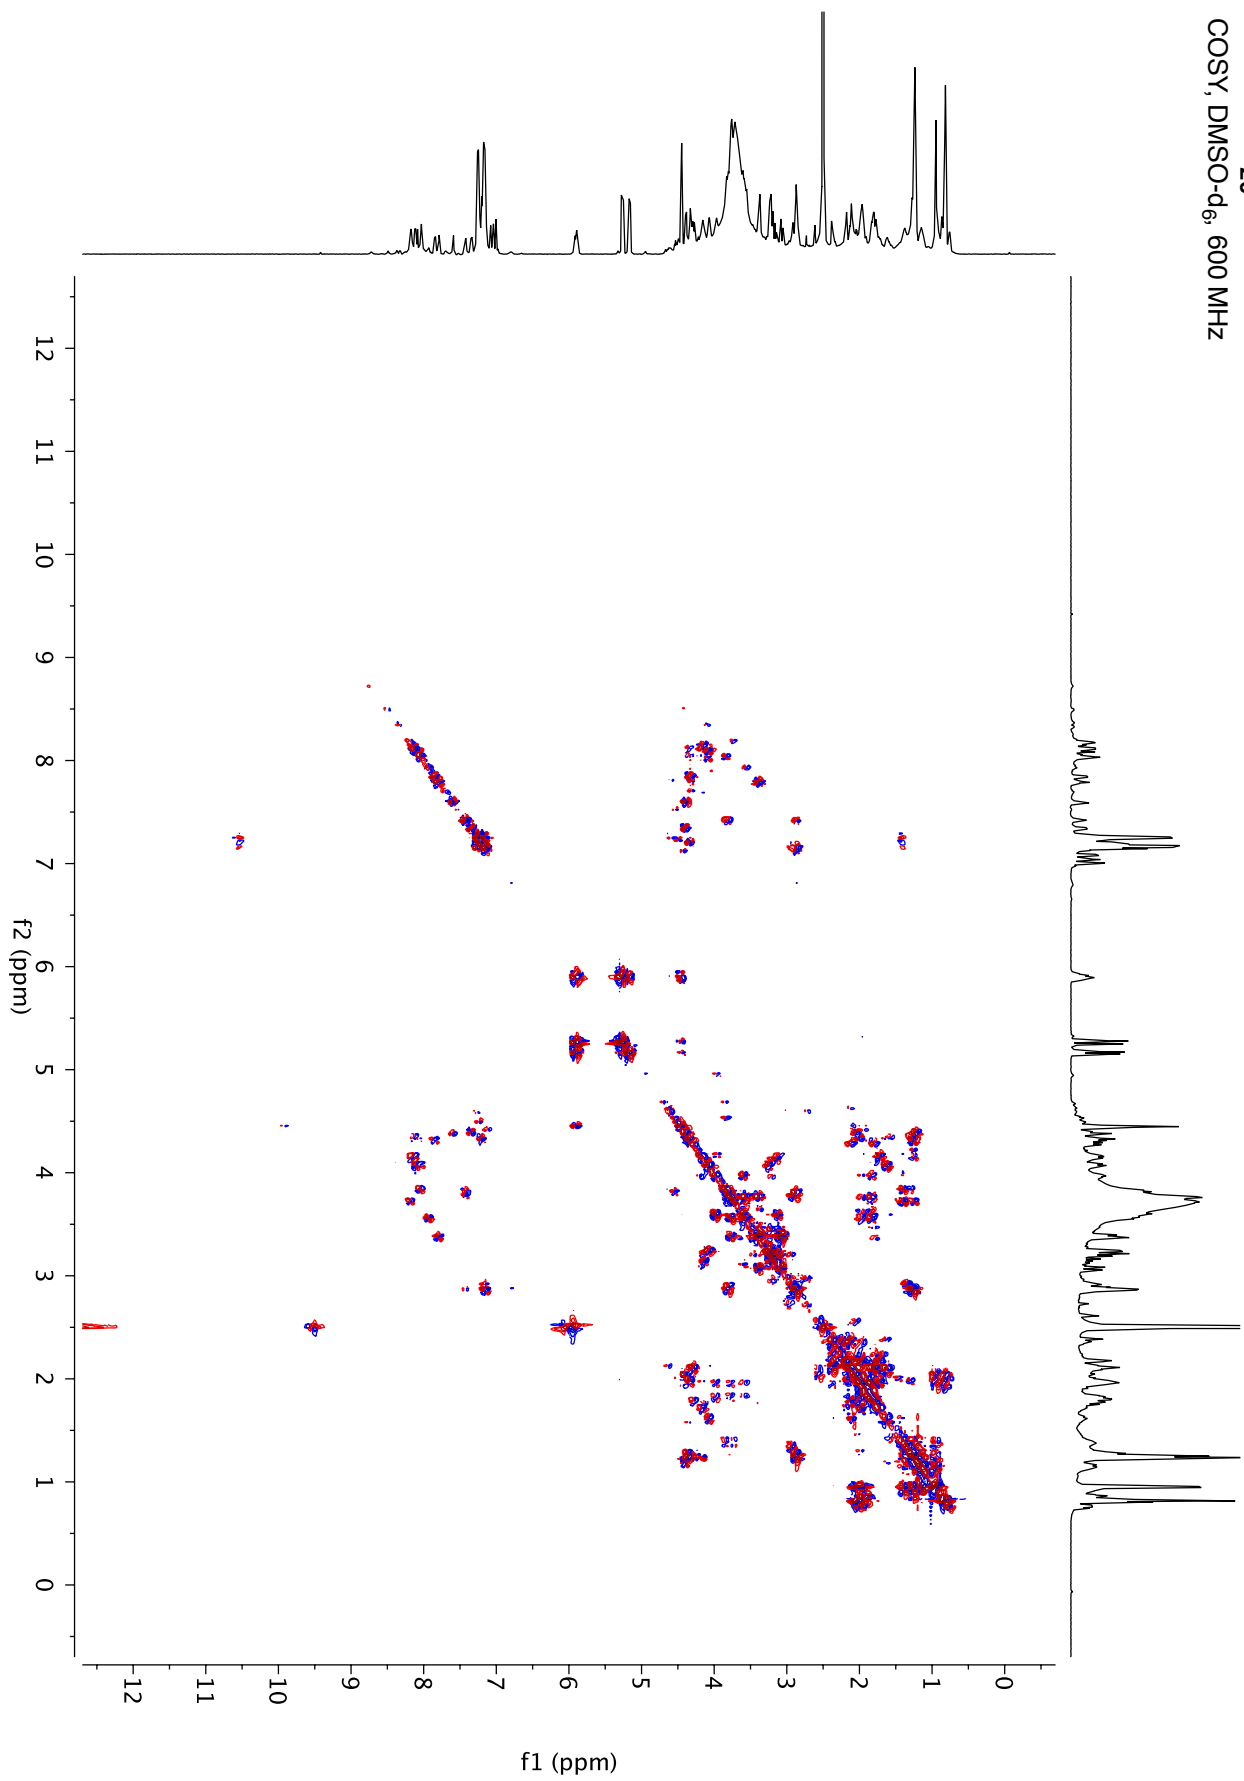

S164



## Peptide 21

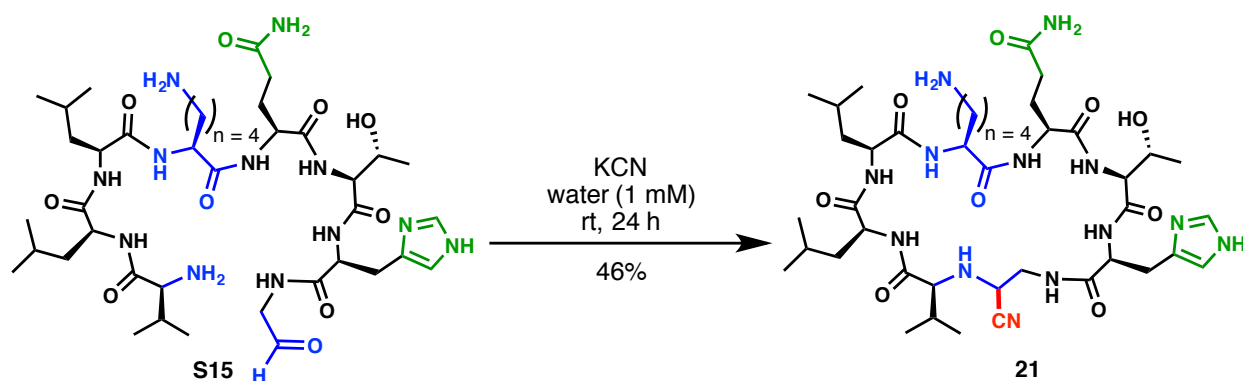

Peptide **21** was prepared according to general procedure 3 from linear amino aldehyde **S15** (7.0 mg, 7.96  $\mu\text{mol}$ ). At  $t = 24$  h, the reaction was purified by preparative reverse-phase HPLC (10% B for 5 min, then 10% to 45% B over 30 min) to afford peptide macrocycle **21** (4.6 mg, 46% yield) as a mixture of diastereomers and as a white solid following lyophilization. *Note: The lysine- $\epsilon\text{NH}_2$  cyclized compound was also isolated as a minor product (2.3:1 **21**:**21-Lys**).*

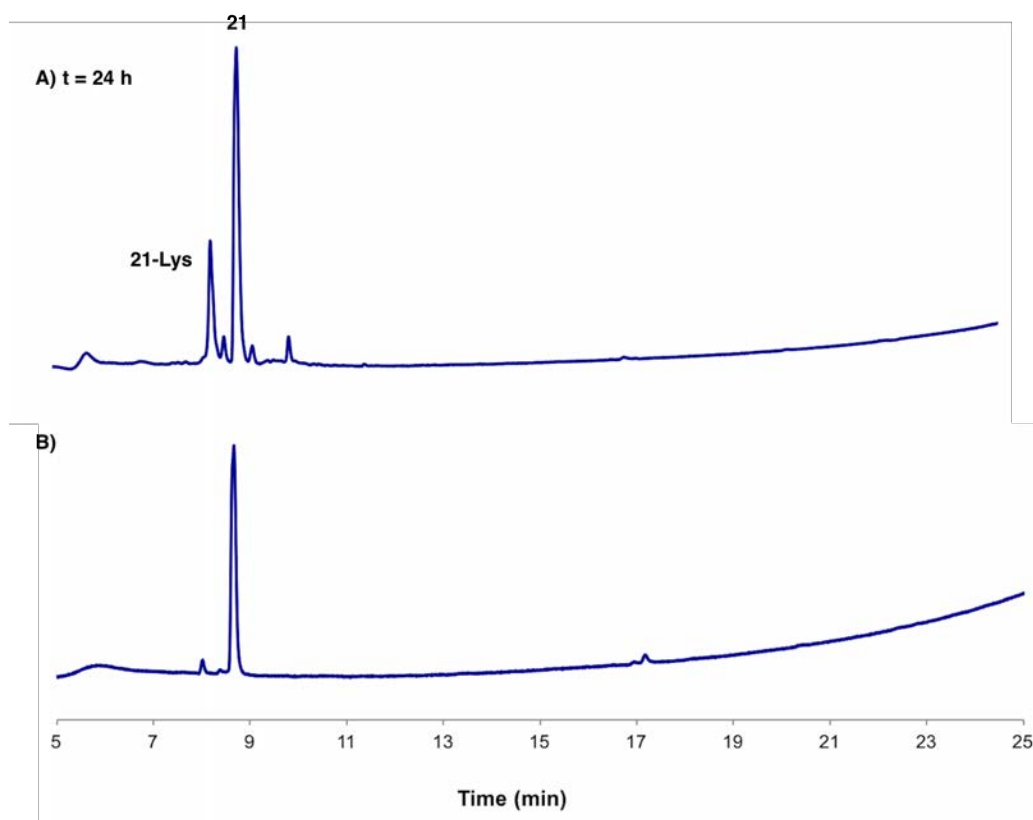

**A)** Crude analytical HPLC trace of the formation of **21** from amino aldehyde **S15** following Strecker macrocyclization (5 to 100% B over 25 min,  $\lambda = 210$  nm). **B)** Purified peptide **21** (Rt = 8.7 min, 5 to 100% B over 25 min,  $\lambda = 210$  nm).

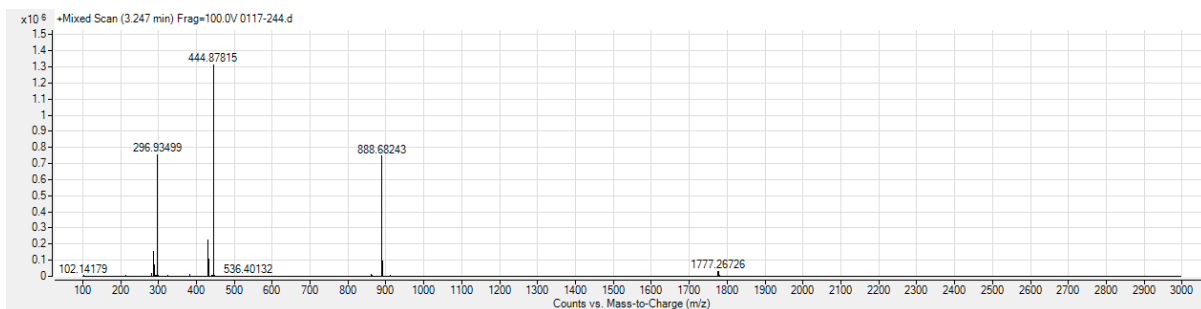

**LRMS (ESI-TOF):** calc'd for  $C_{26}H_{40}N_5O_5$   $[M+H]^+$  888.54; found 888.68,  $[M+2H]^{2+}$  444.77; found 444.89.

**Partial 2D NMR Correlations:**

(top: compound **21**; bottom: compound **21-Lys**)

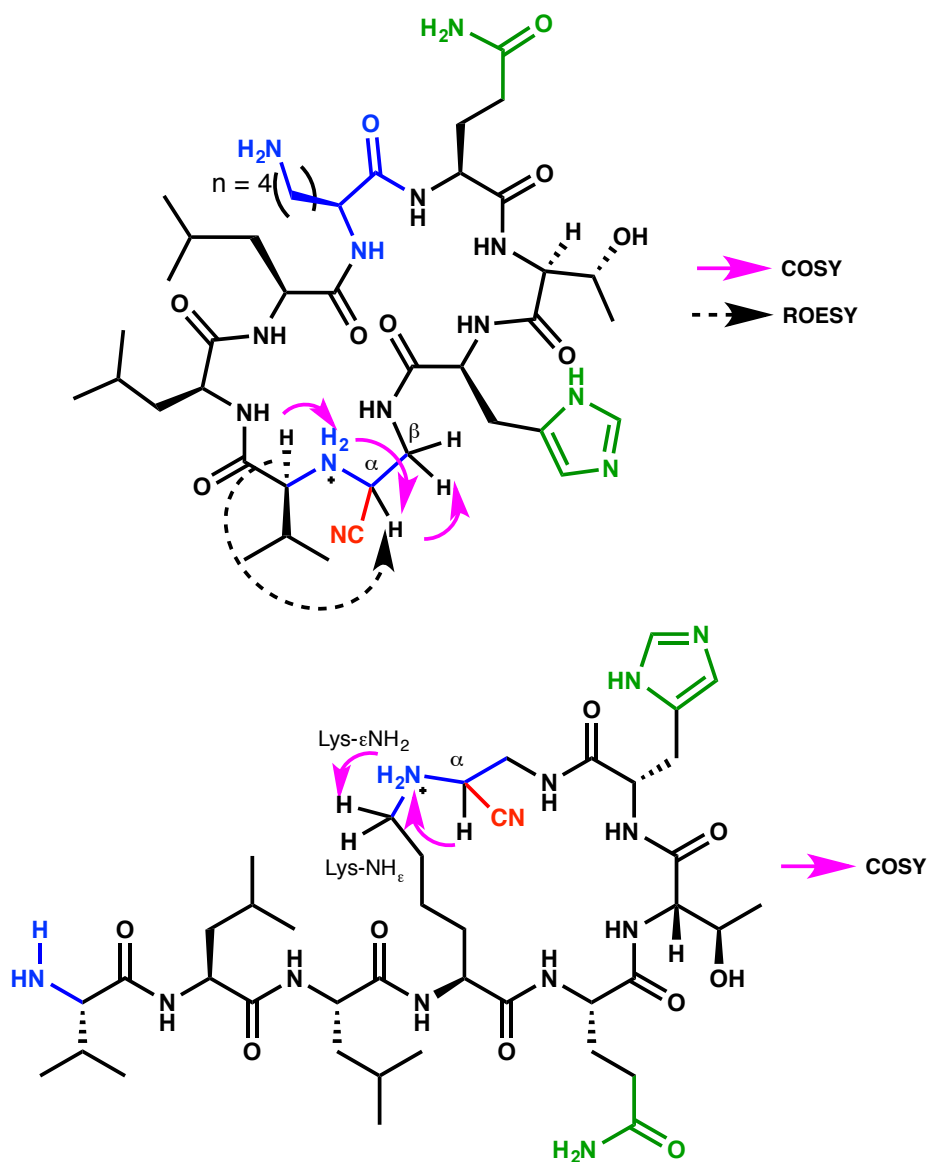

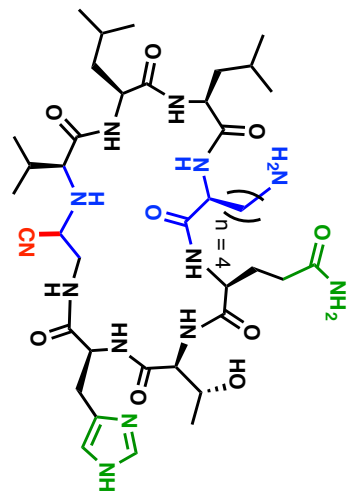

<sup>1</sup>H, DMSO-d<sub>6</sub>, 600 MHz

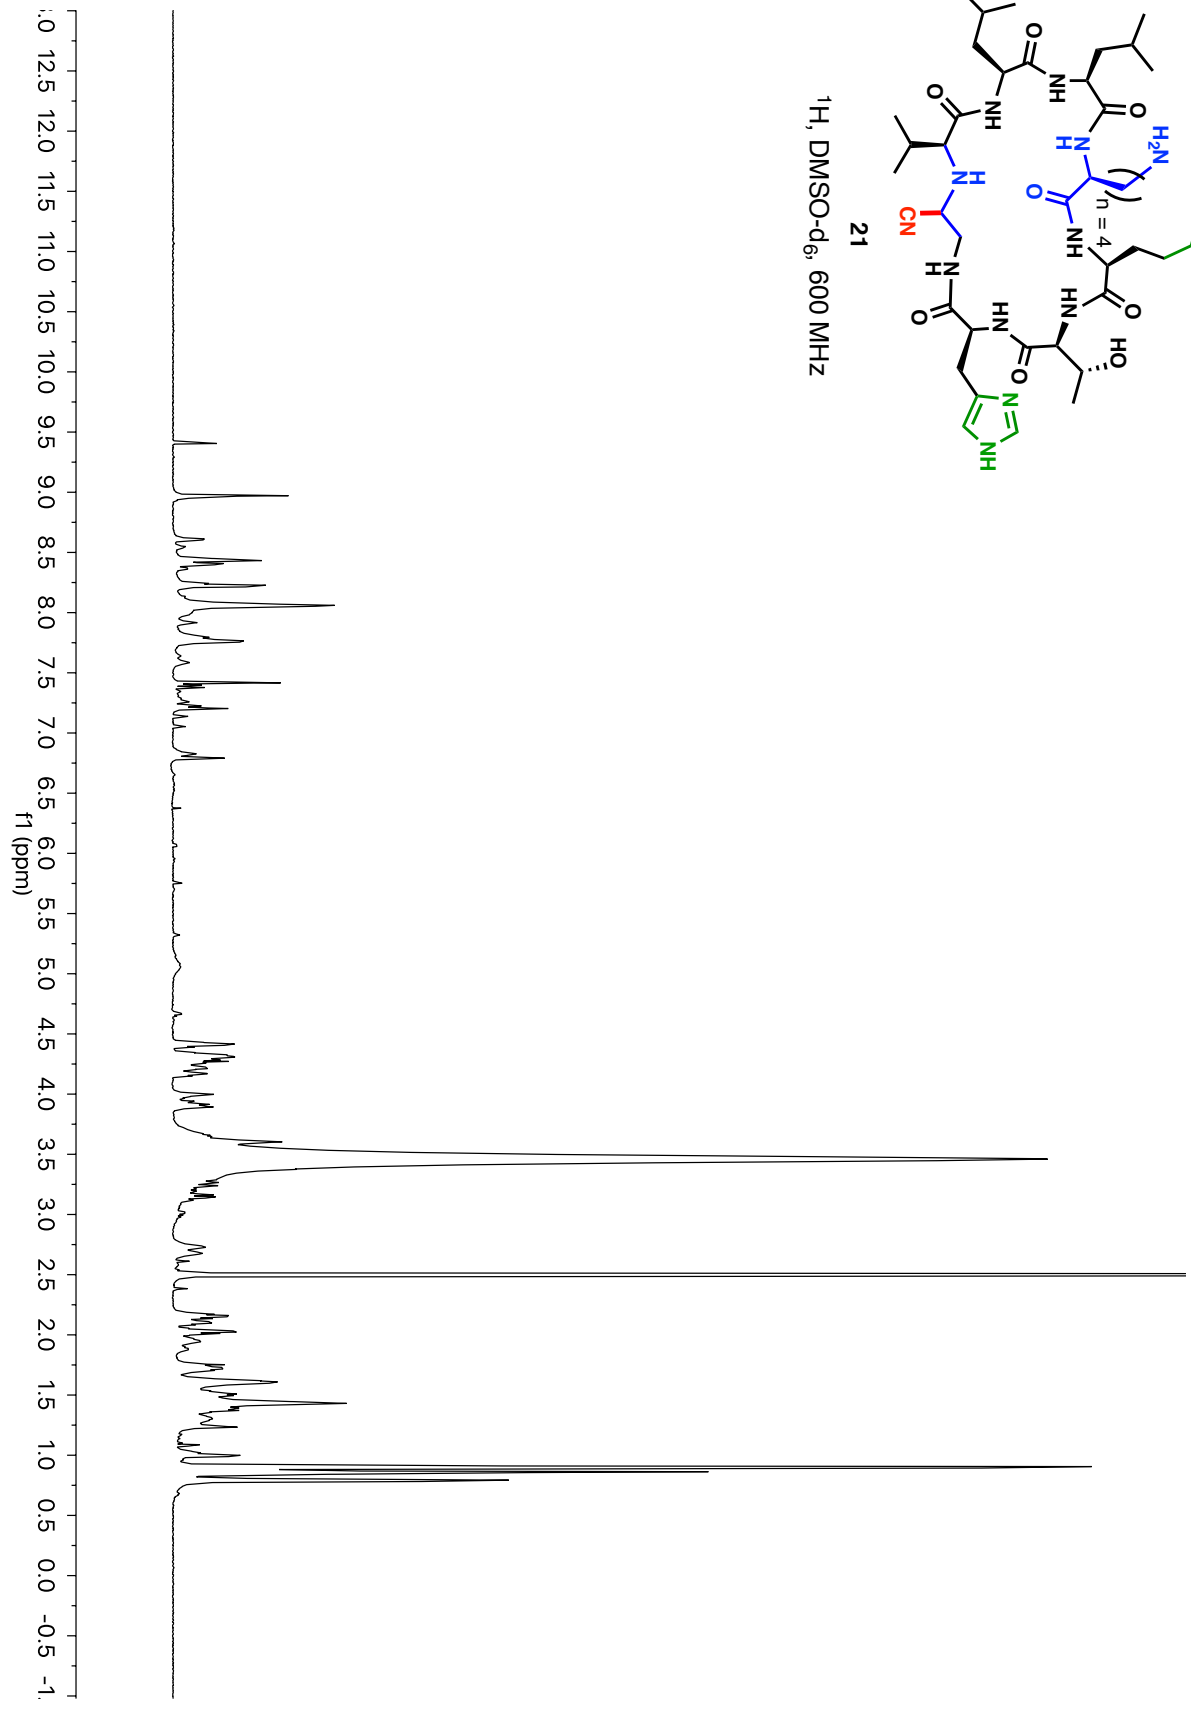

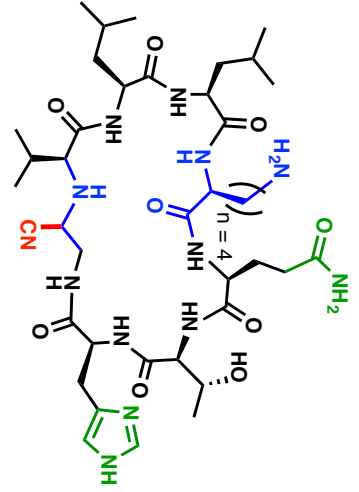

21

<sup>13</sup>C, DMSO-d<sub>6</sub>, 151 MHz

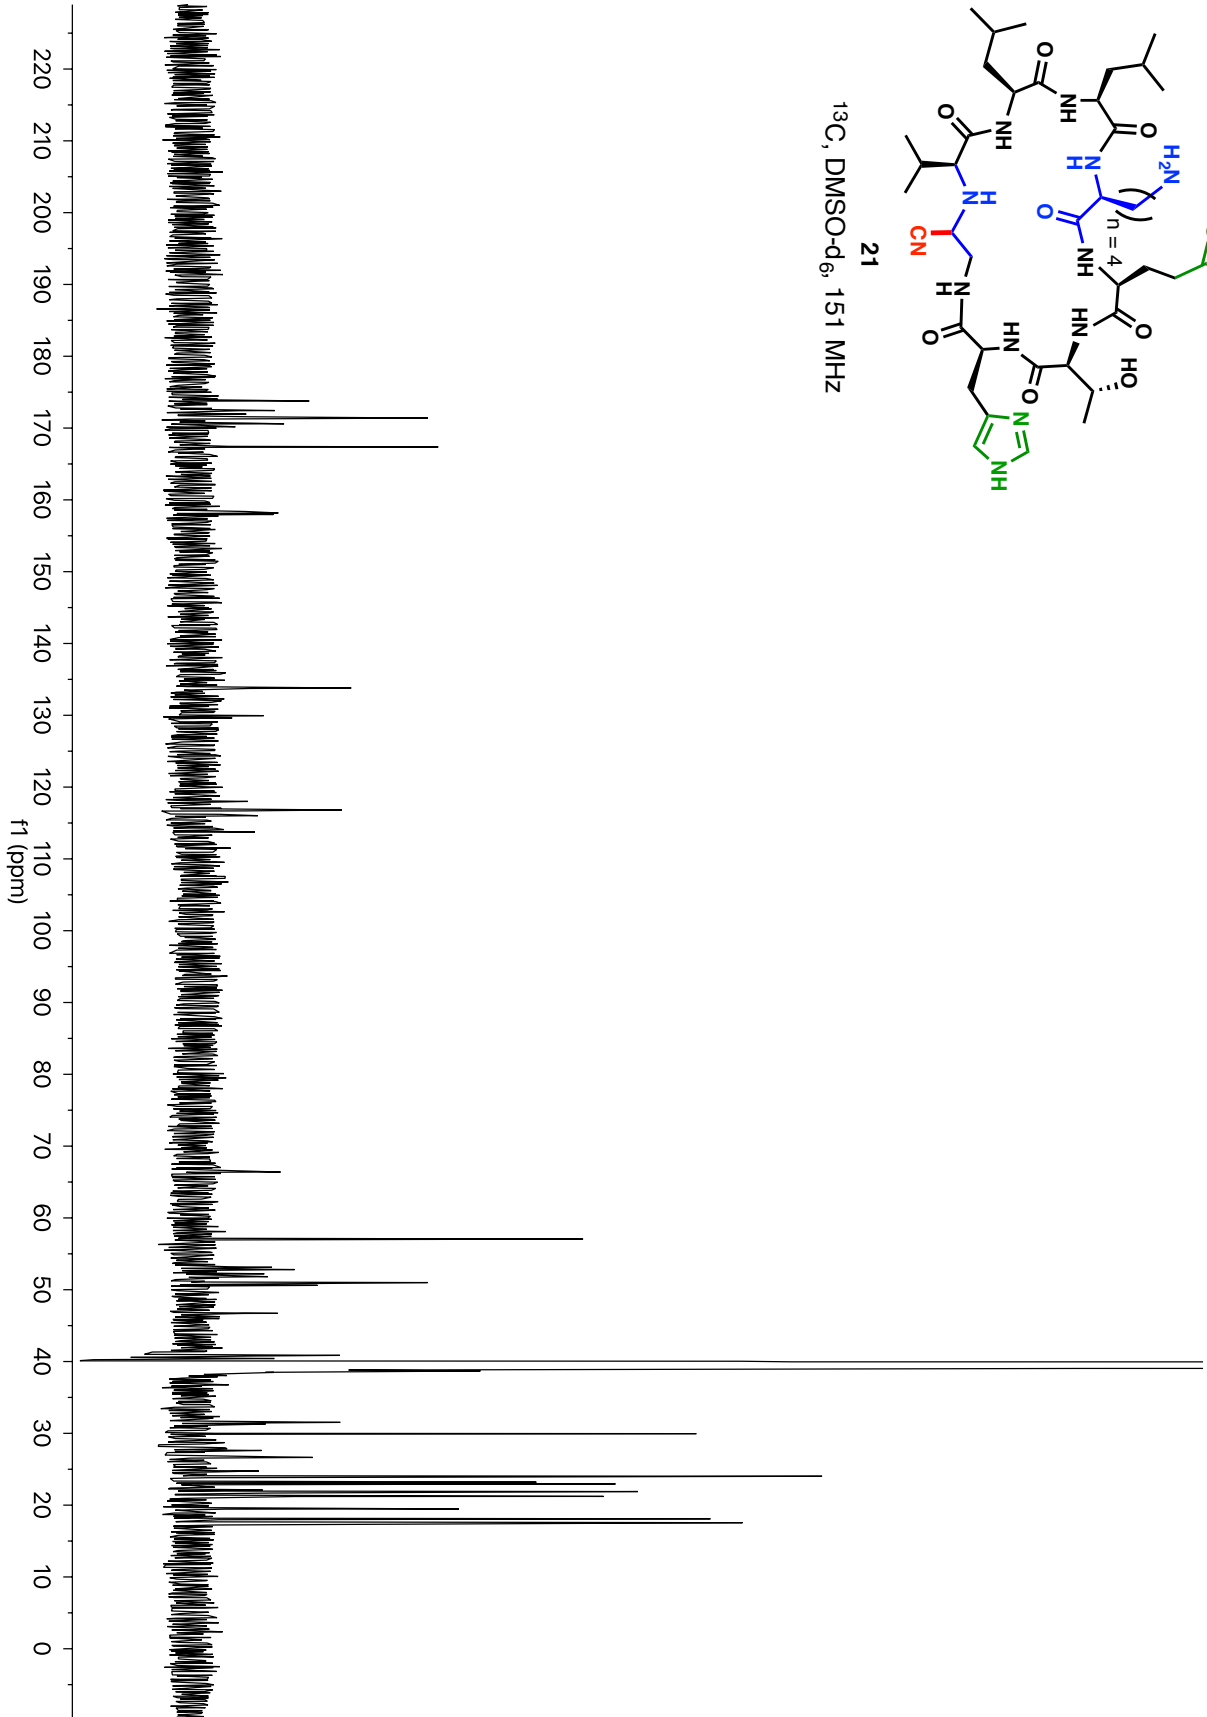

21  
COSY, DMSO-d<sub>6</sub>, 600 MHz

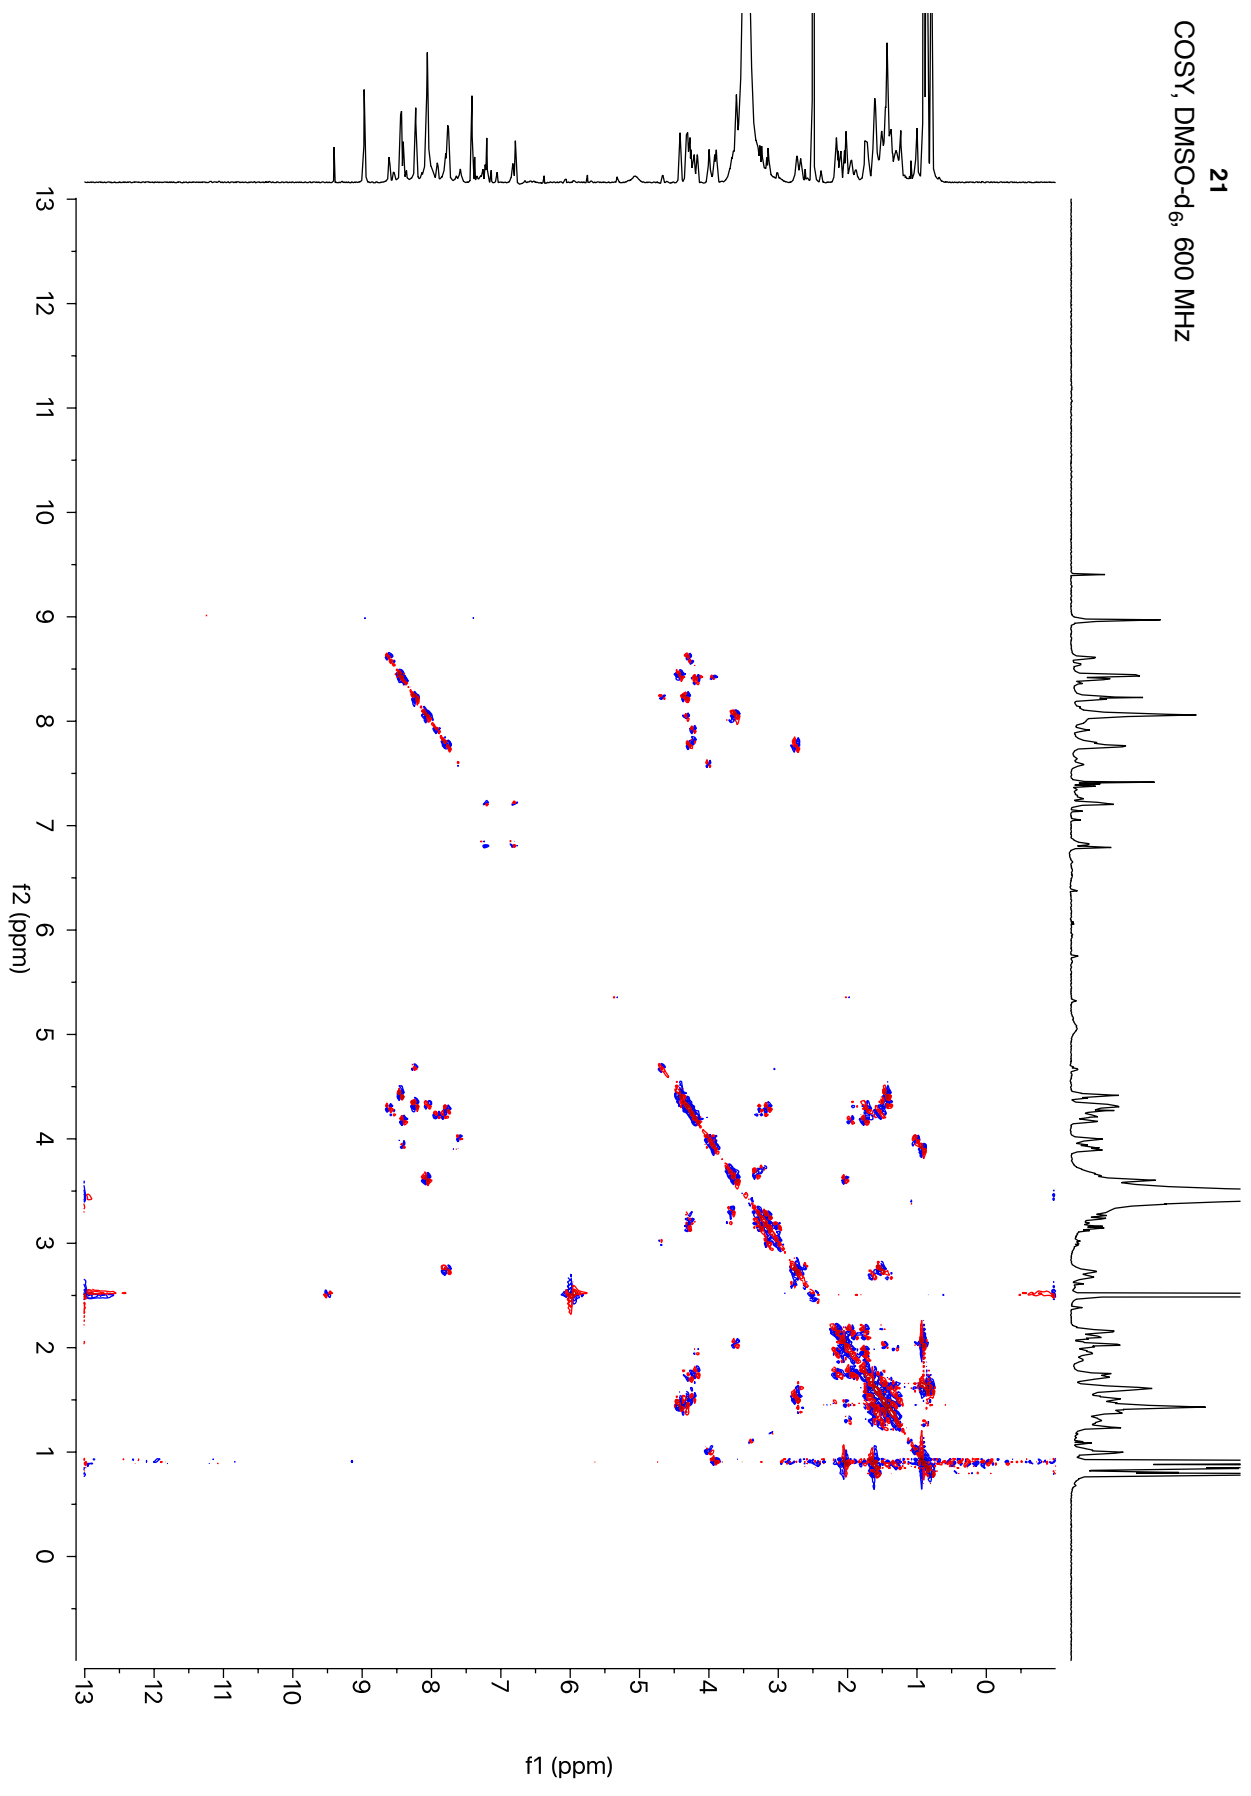

21  
COSY, DMSO-d<sub>6</sub>, 600 MHz

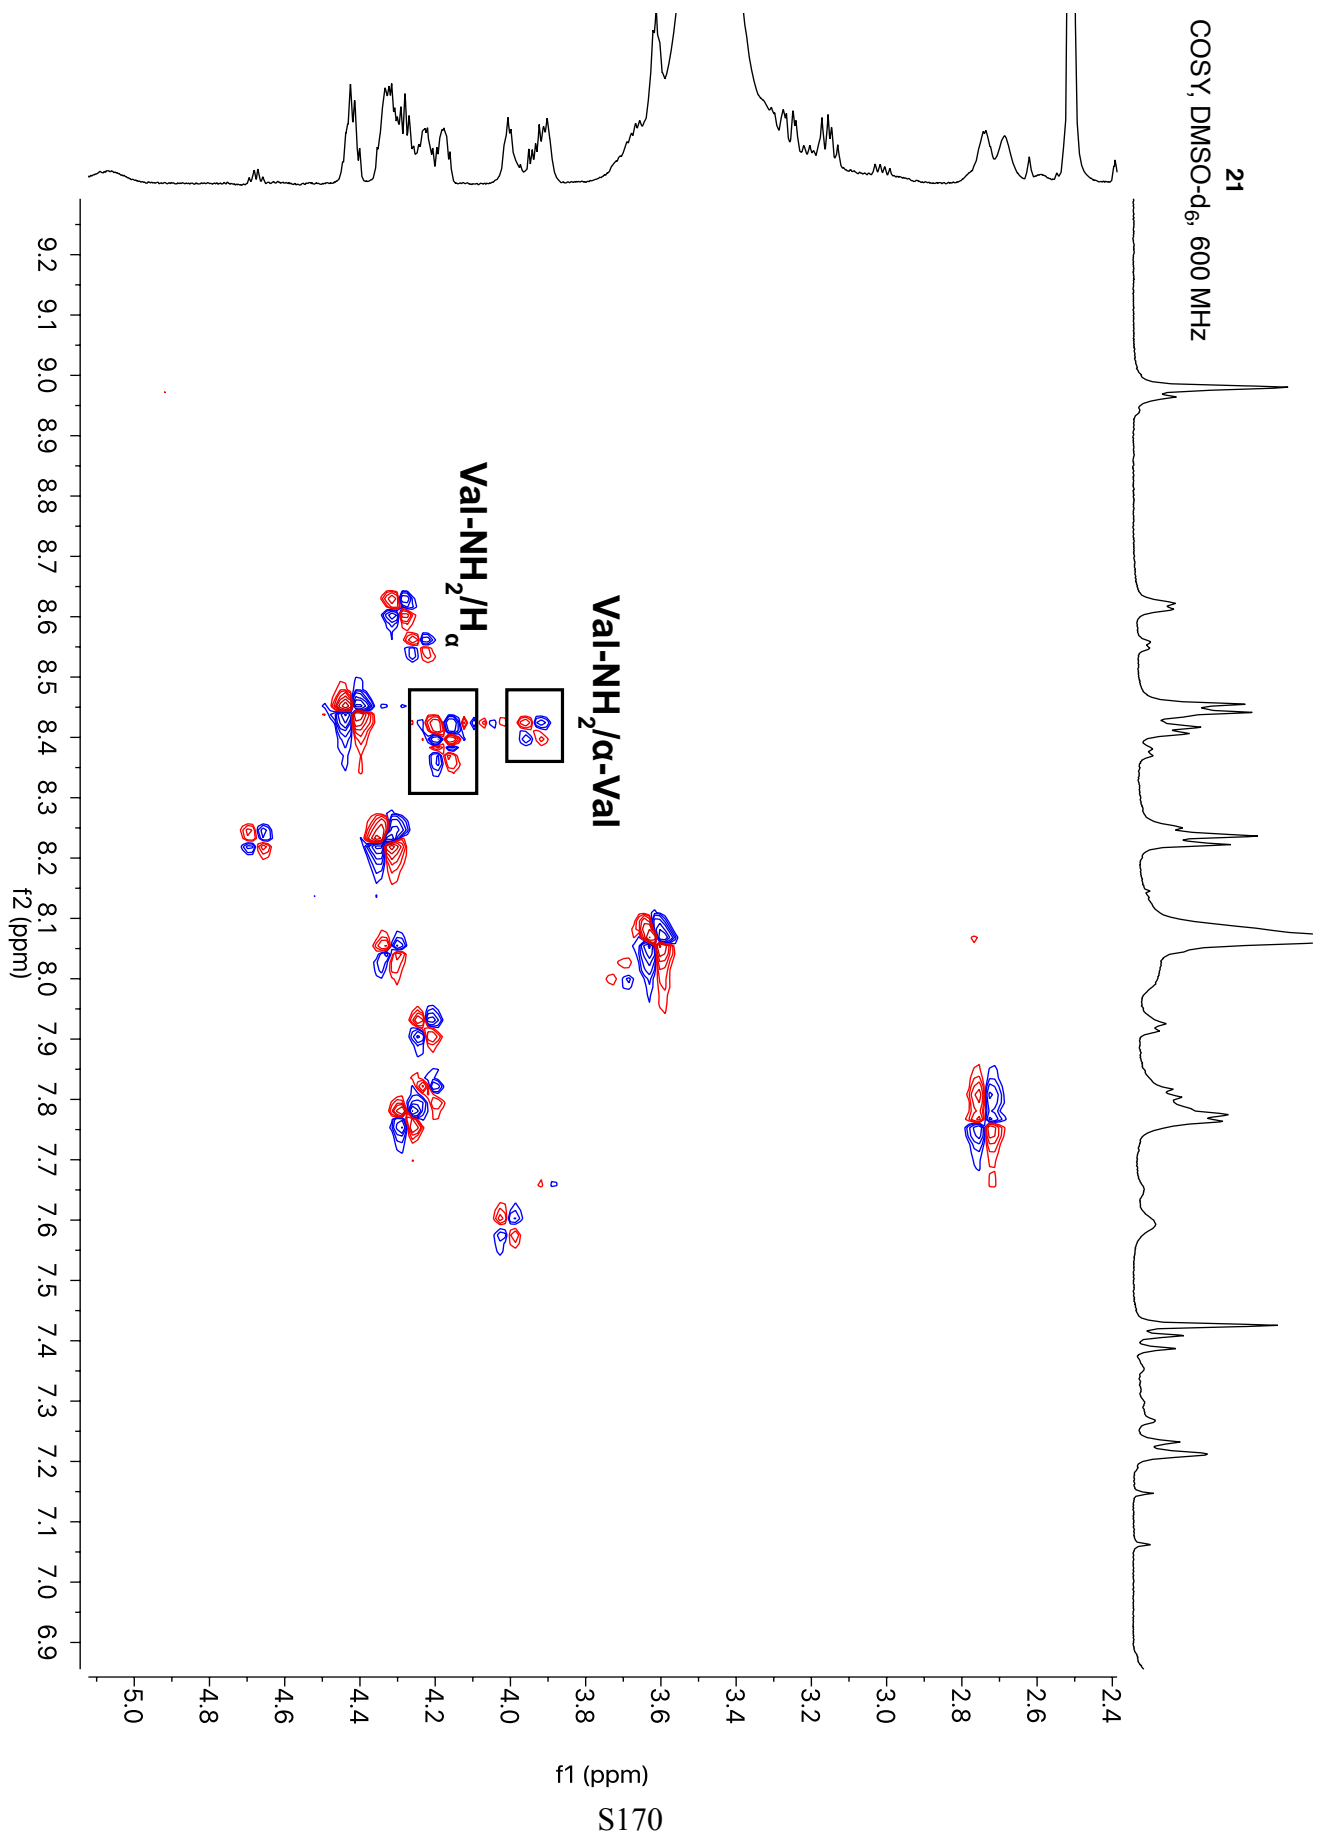

f1 (ppm)  
S170

21  
HMBC, DMSO-d<sub>6</sub>, 600 MHz

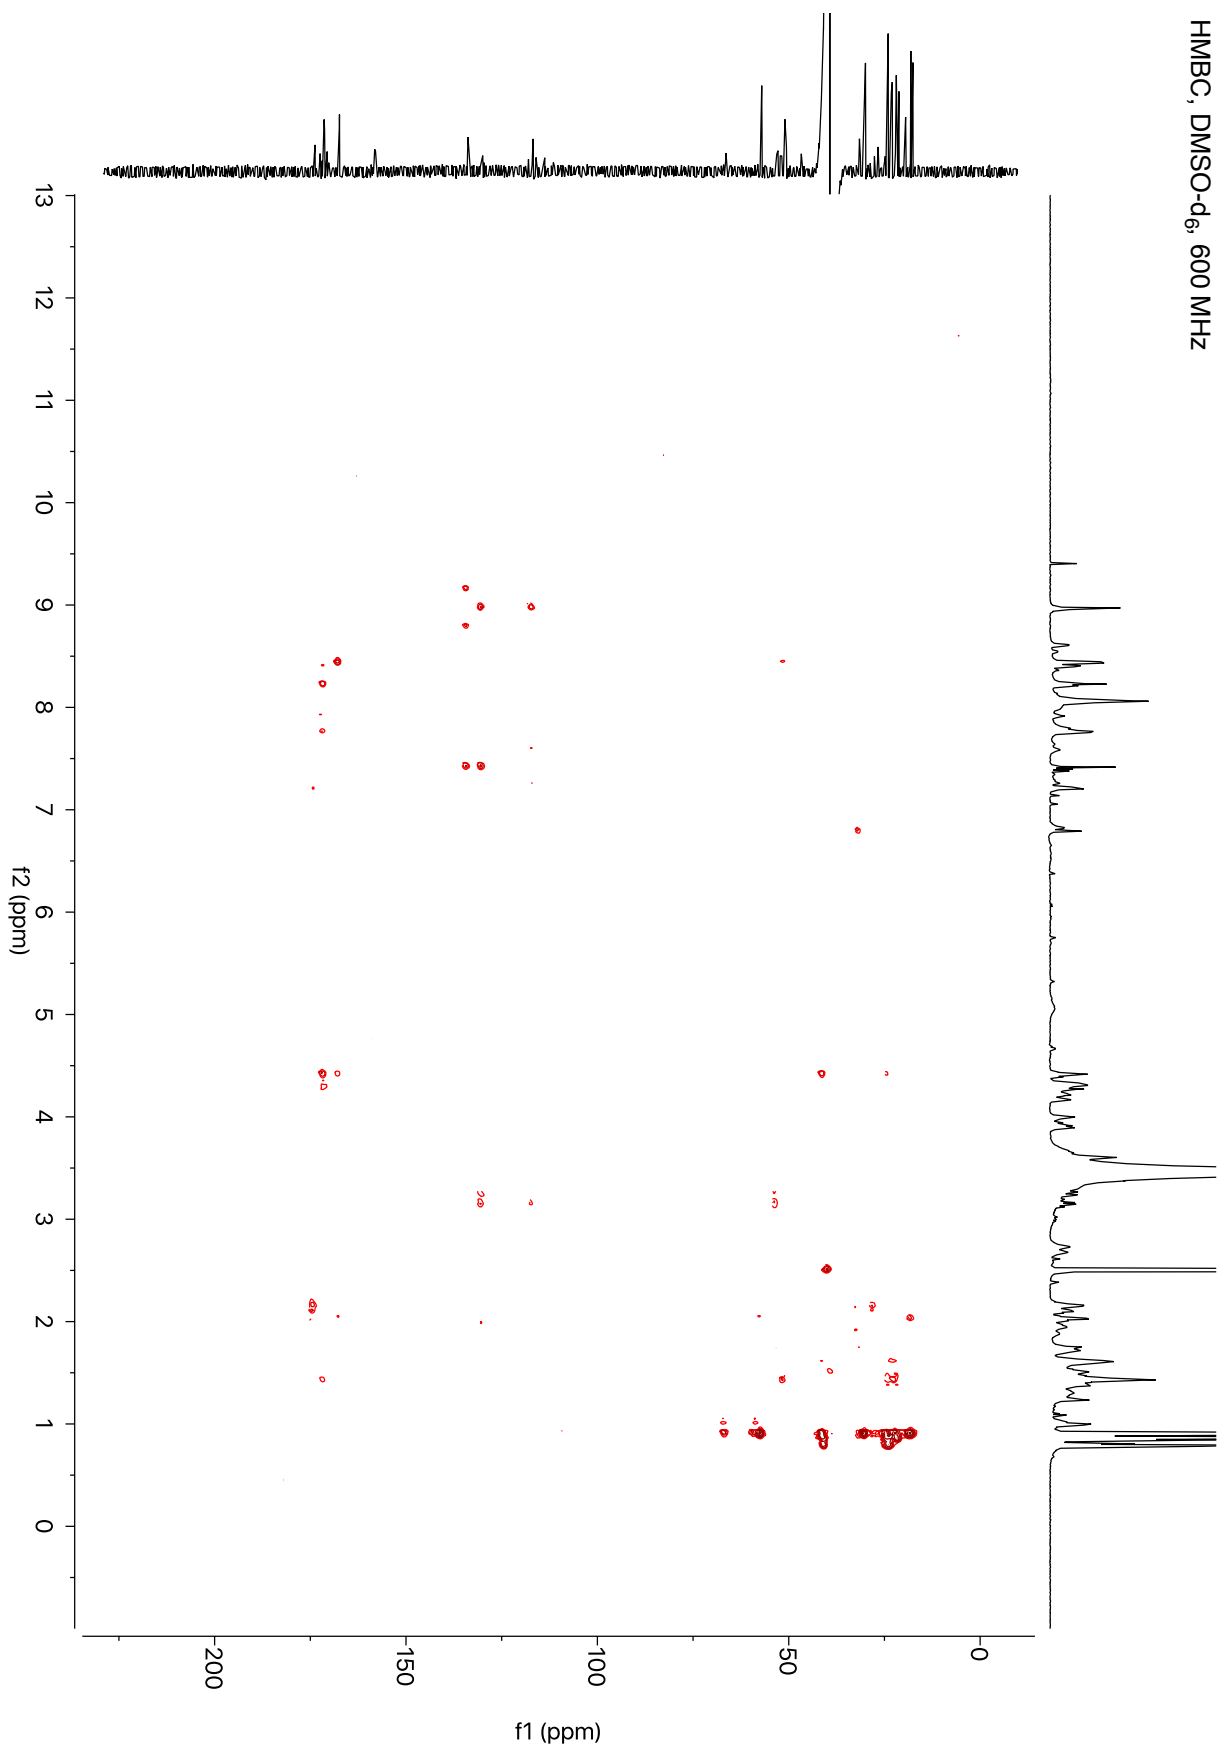

21  
ROESY, DMSO-d<sub>6</sub>, 600 MHz

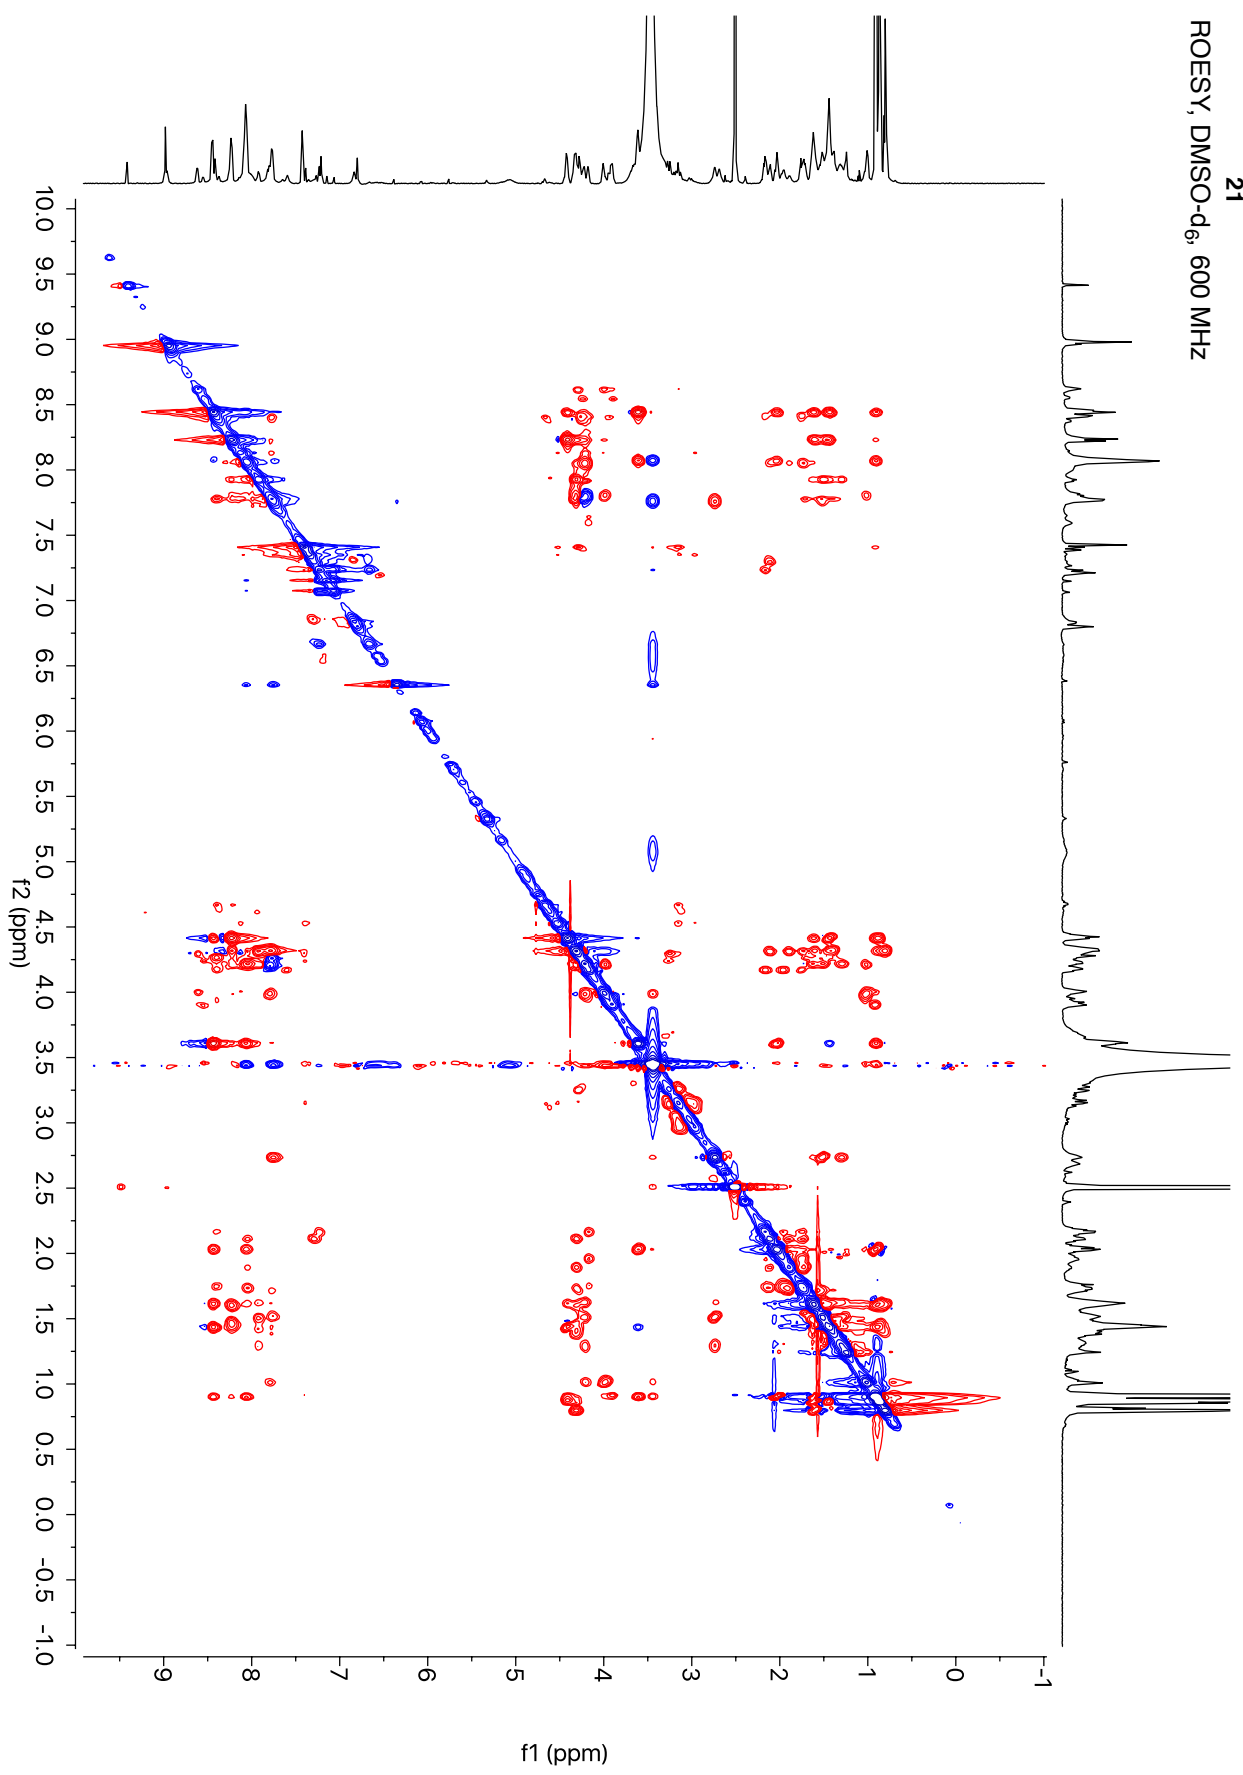



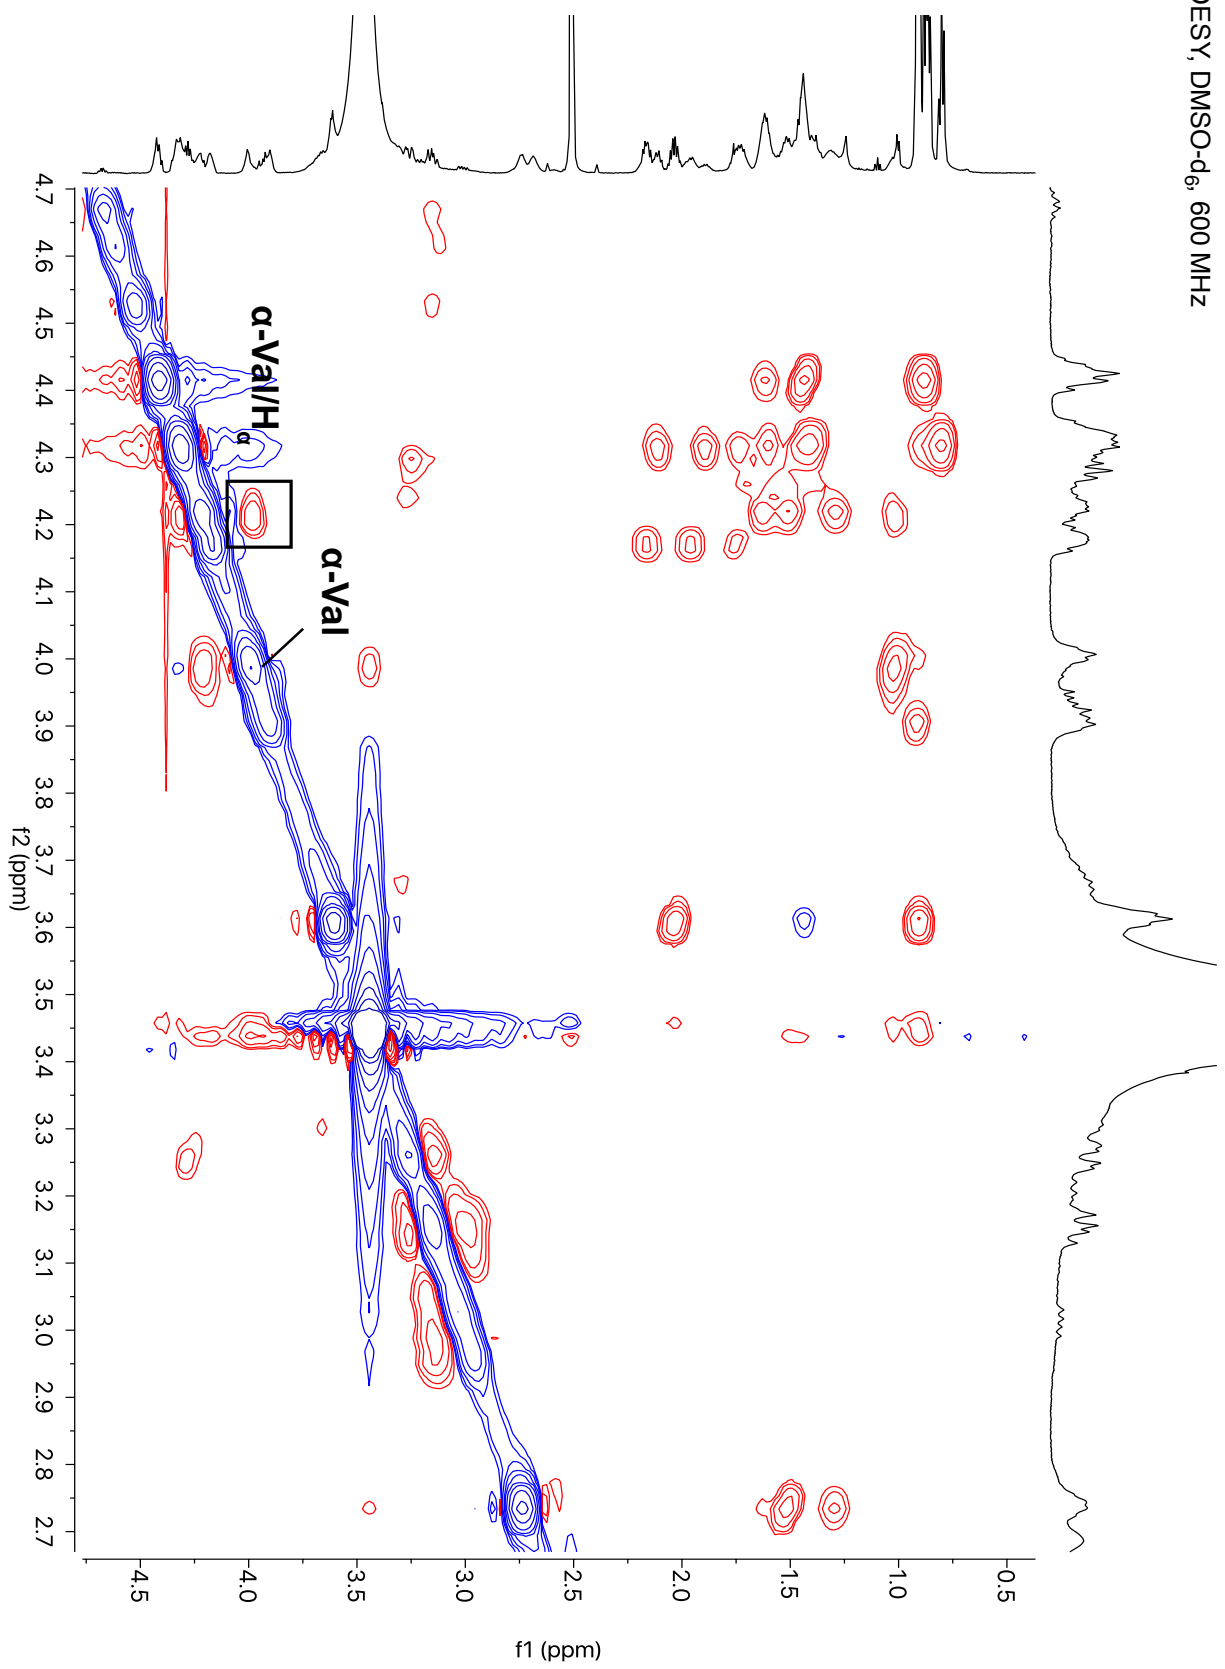

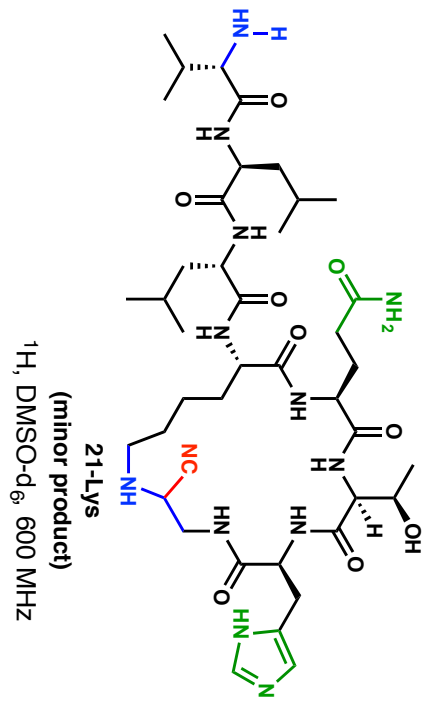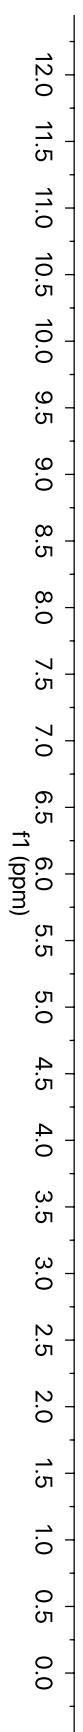

21-Lys  
(minor product)  
COSY, DMSO-d<sub>6</sub>, 600 MHz

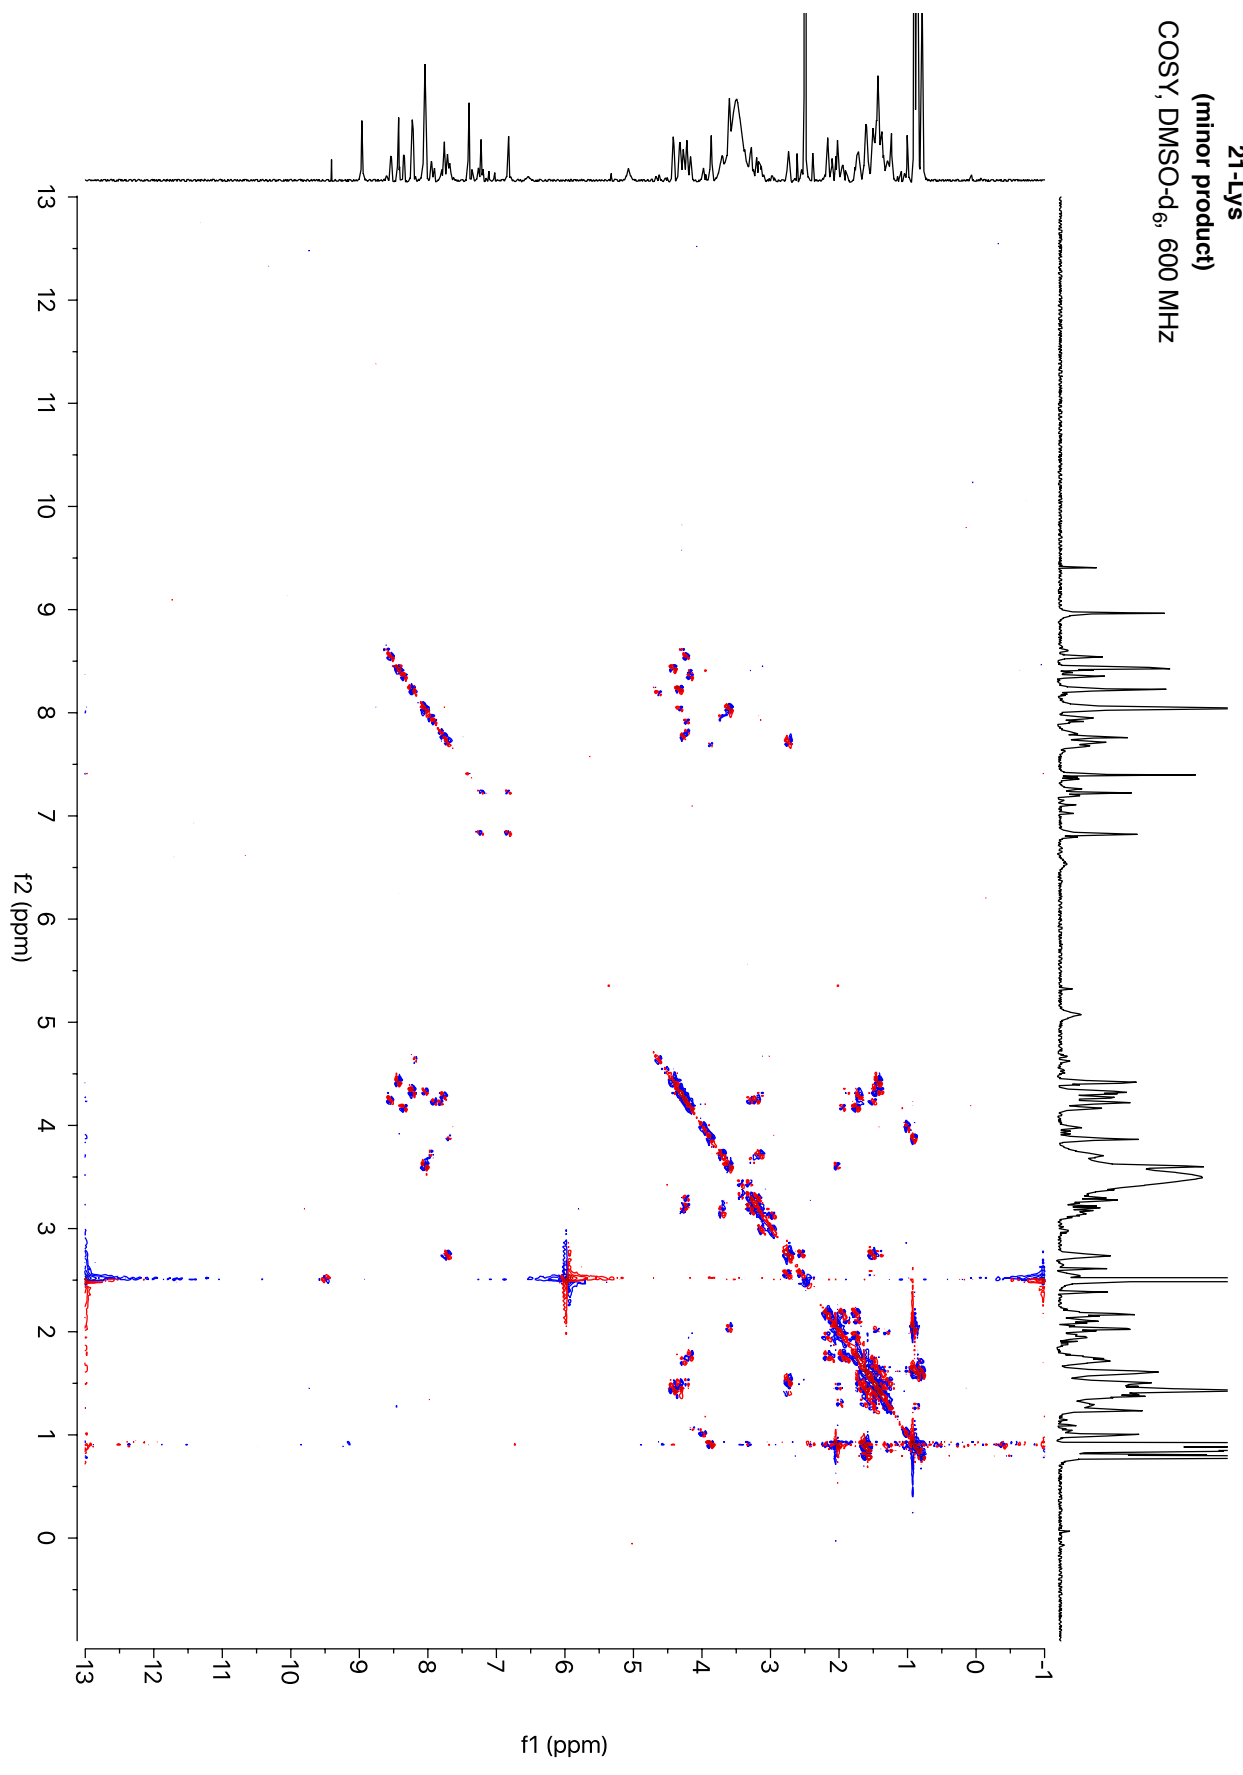

21-Lys  
(minor product)  
COSY, DMSO-d<sub>6</sub>, 600 MHz

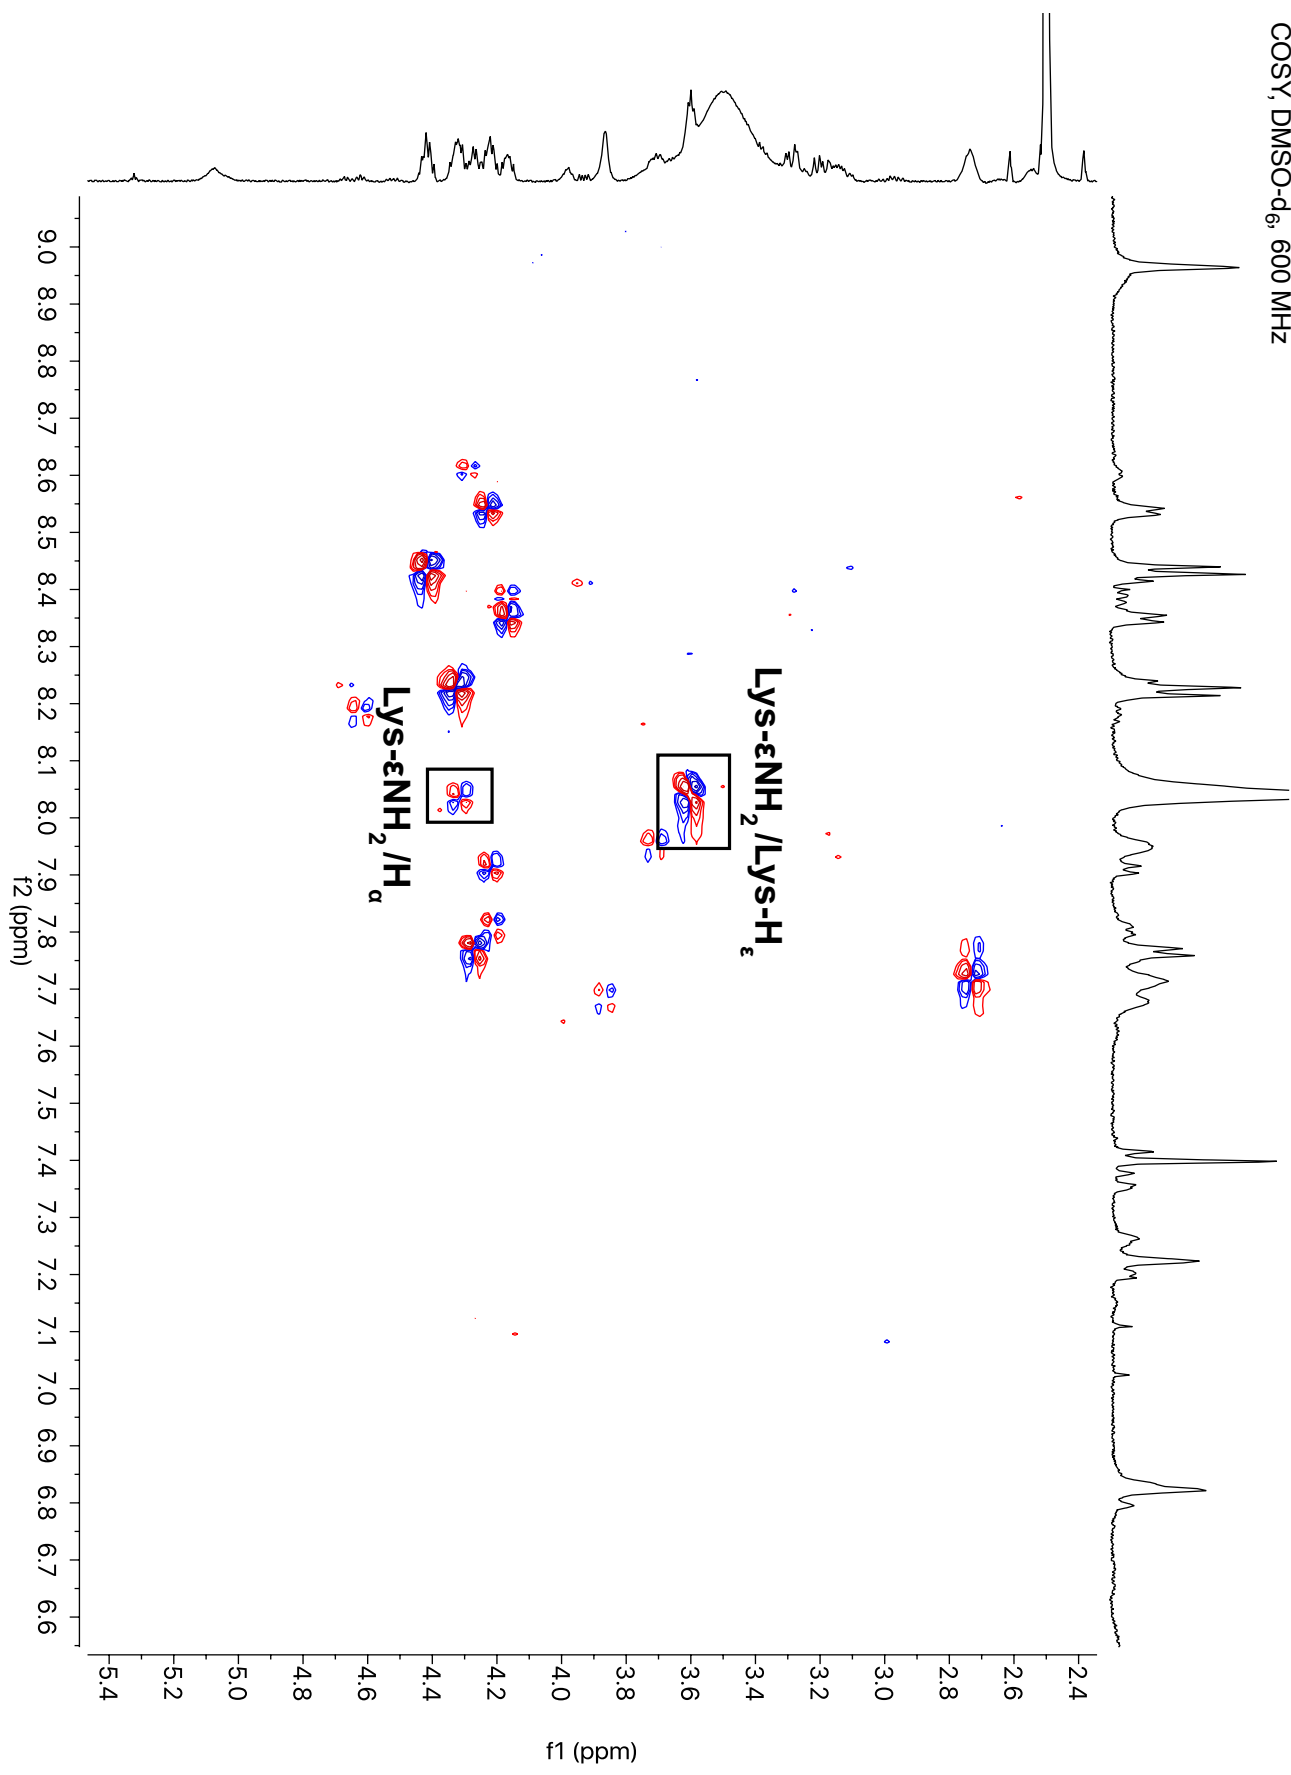

## Peptide 22

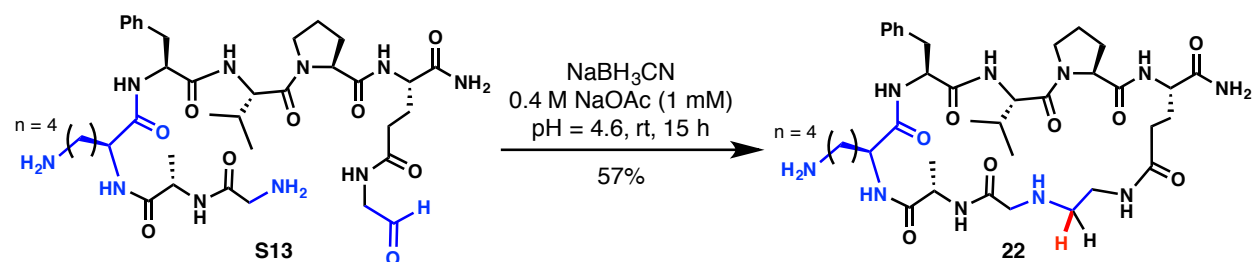

Peptide **22** was prepared according to general procedure 4 from linear amino aldehyde **S13** ( $4.3 \text{ mg}$ ,  $5.5 \mu\text{mol}$ ). At  $t = 15 \text{ h}$ , the reaction was purified by preparative reverse-phase HPLC ( $5\% \text{ B}$  for  $5 \text{ min}$ , then  $5\%$  to  $45\% \text{ B}$  over  $30 \text{ min}$ ) to afford peptide macrocycle **22** ( $2.4 \text{ mg}$ ,  $57\%$  yield) as a white solid following lyophilization.

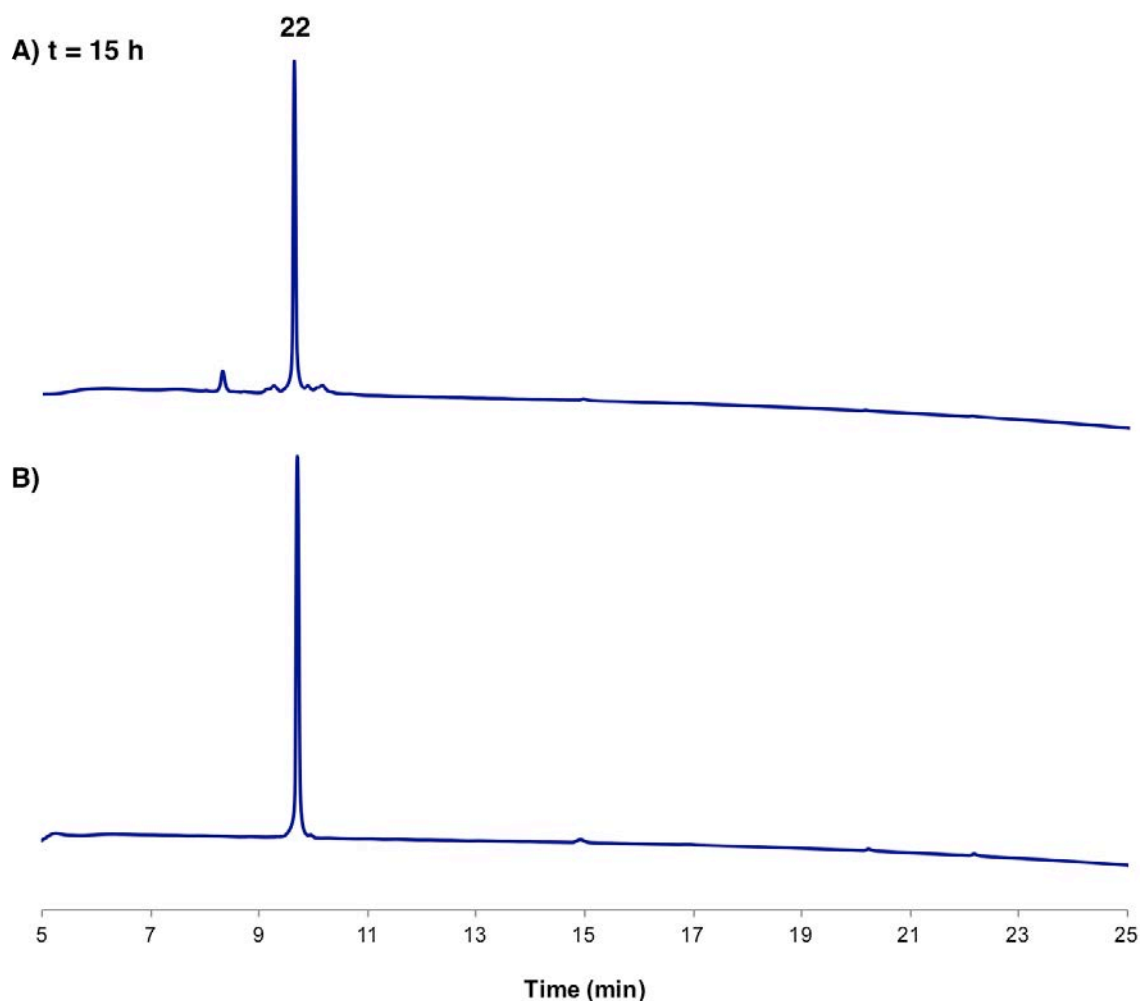

**A)** Crude analytical HPLC trace of the formation of **22** from amino aldehyde **S13** following reductive amination ( $5$  to  $100\% \text{ B}$  over  $25 \text{ min}$ ,  $\lambda = 210 \text{ nm}$ ). **B)** Purified peptide **22** ( $R_t = 9.7 \text{ min}$ ,  $5$  to  $100\% \text{ B}$  over  $25 \text{ min}$ ,  $\lambda = 210 \text{ nm}$ ).

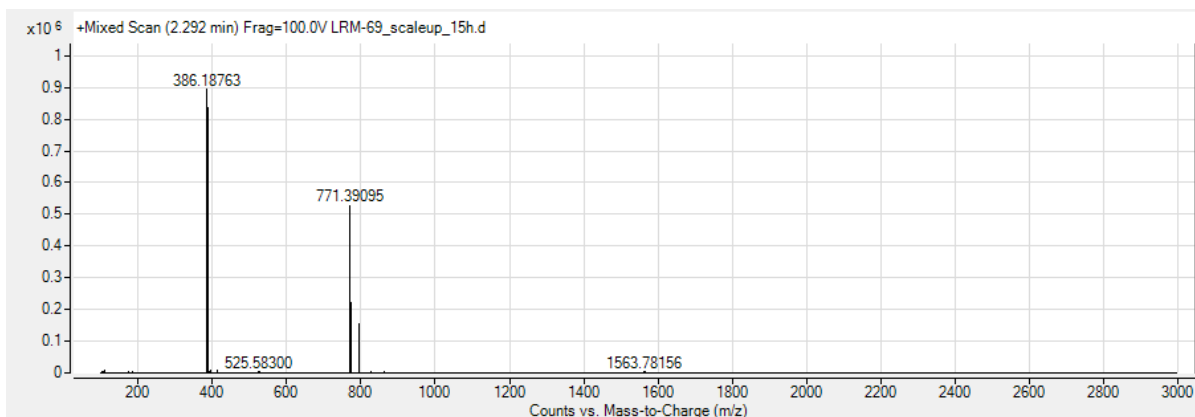

**LRMS (ESI-TOF):** calc'd for  $C_{37}H_{59}N_{10}O_8$   $[M+H]^+$  771.45; found 771.39,  $[M+2H]^{2+}$  386.23; found 386.19.

**Partial 2D NMR Correlations:**

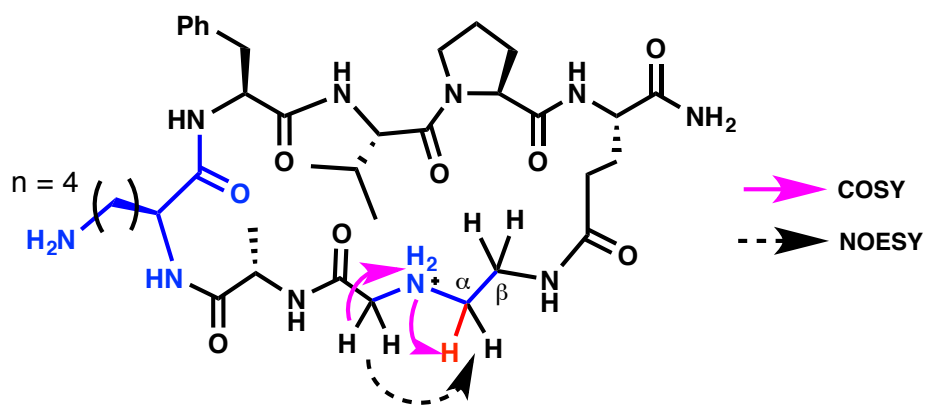

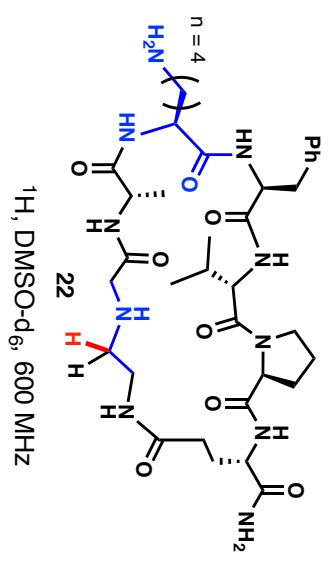

$^1H$ , DMSO- $d_6$ , 600 MHz

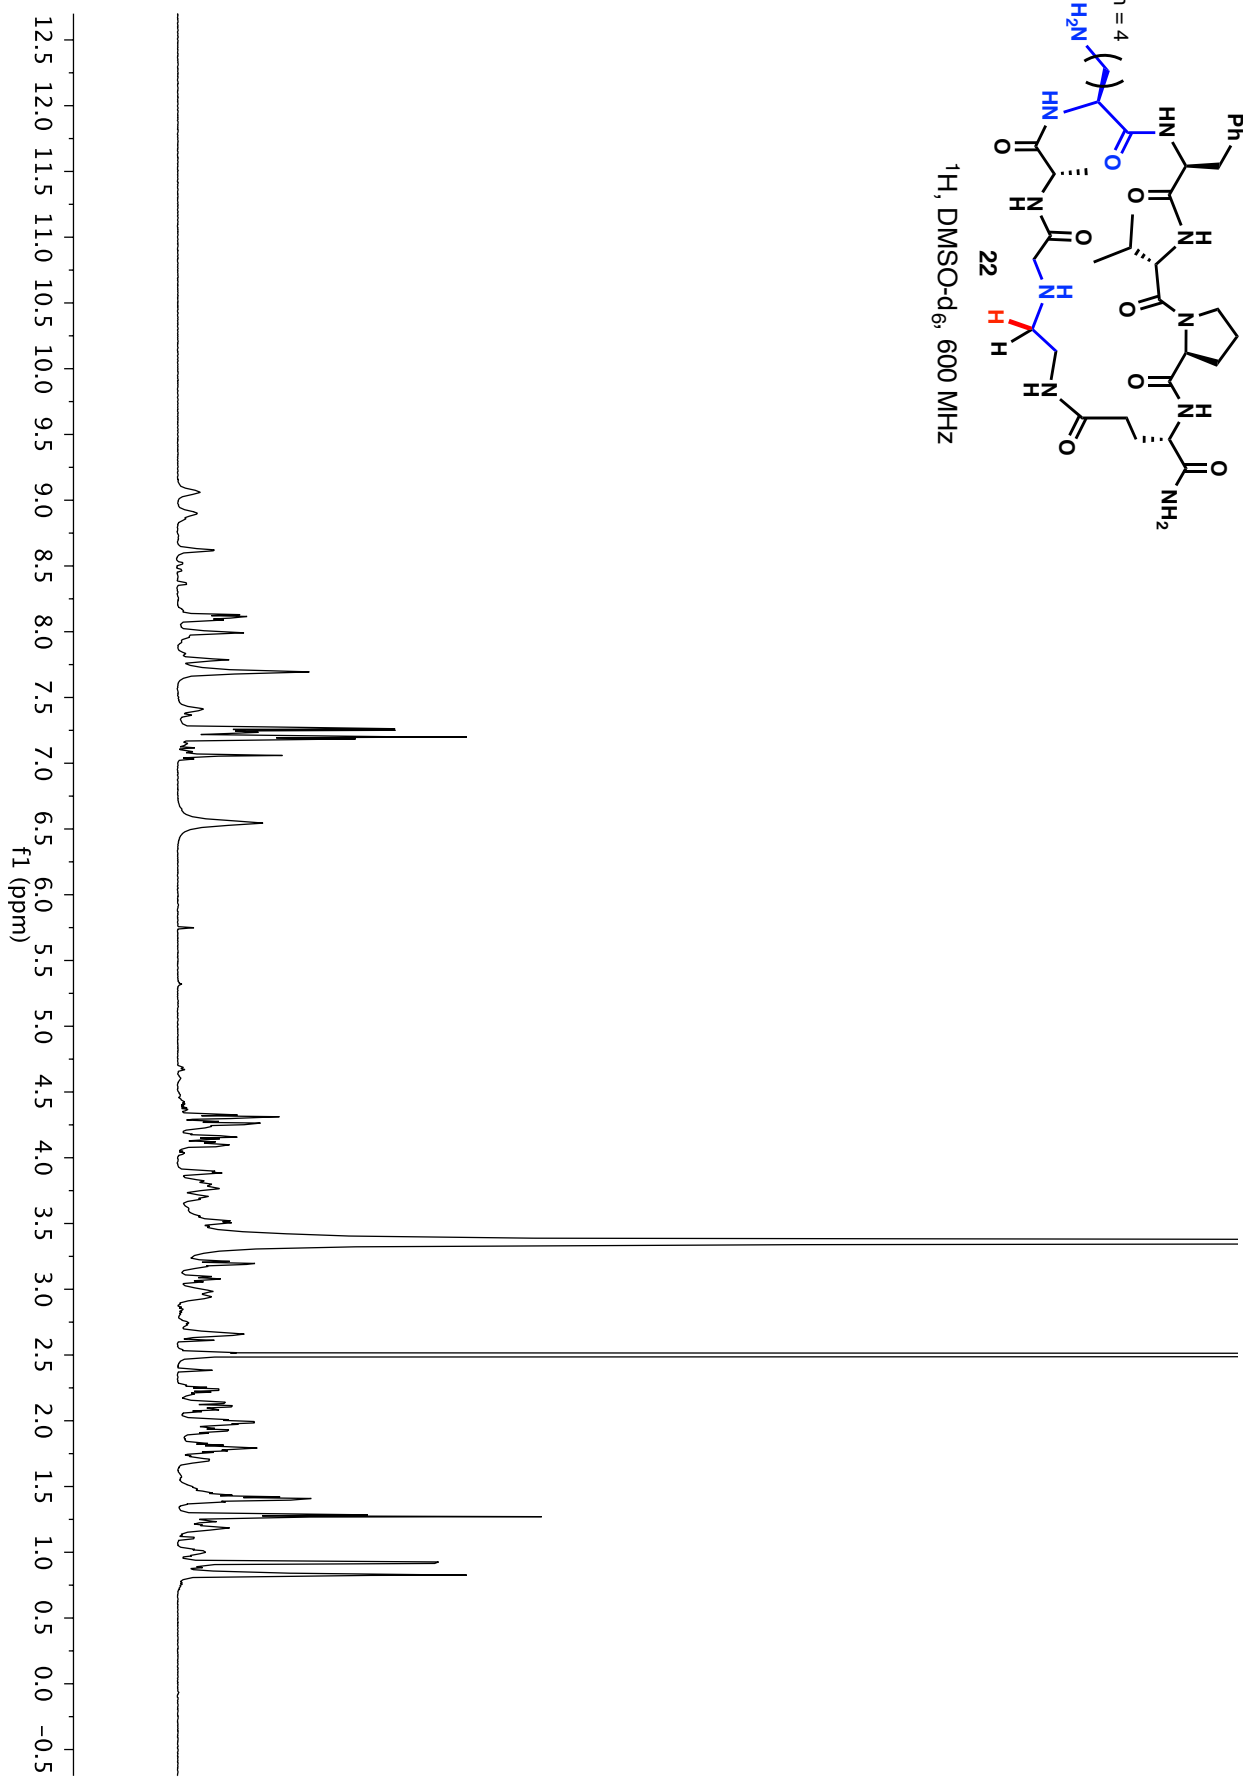

22  
COSY, DMSO-d<sub>6</sub>, 600 MHz

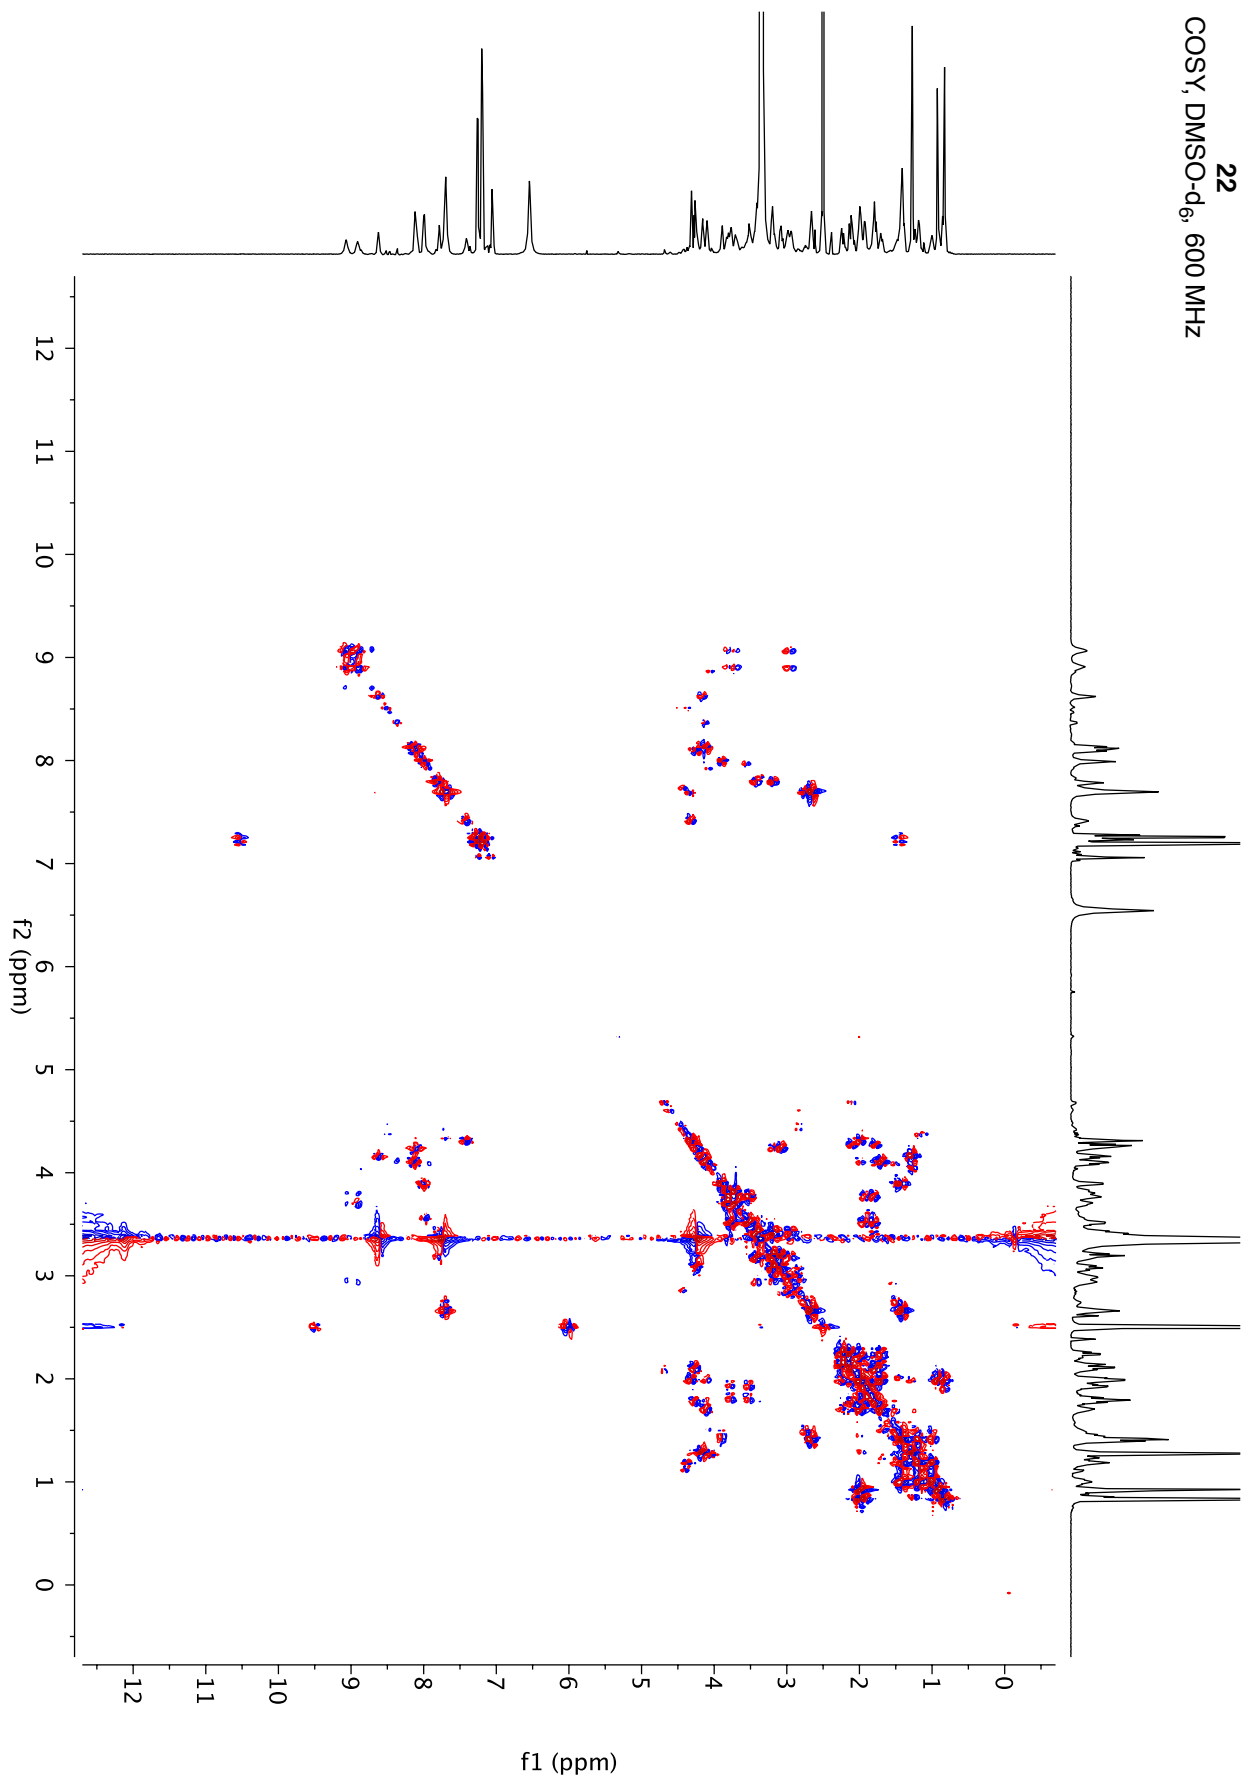



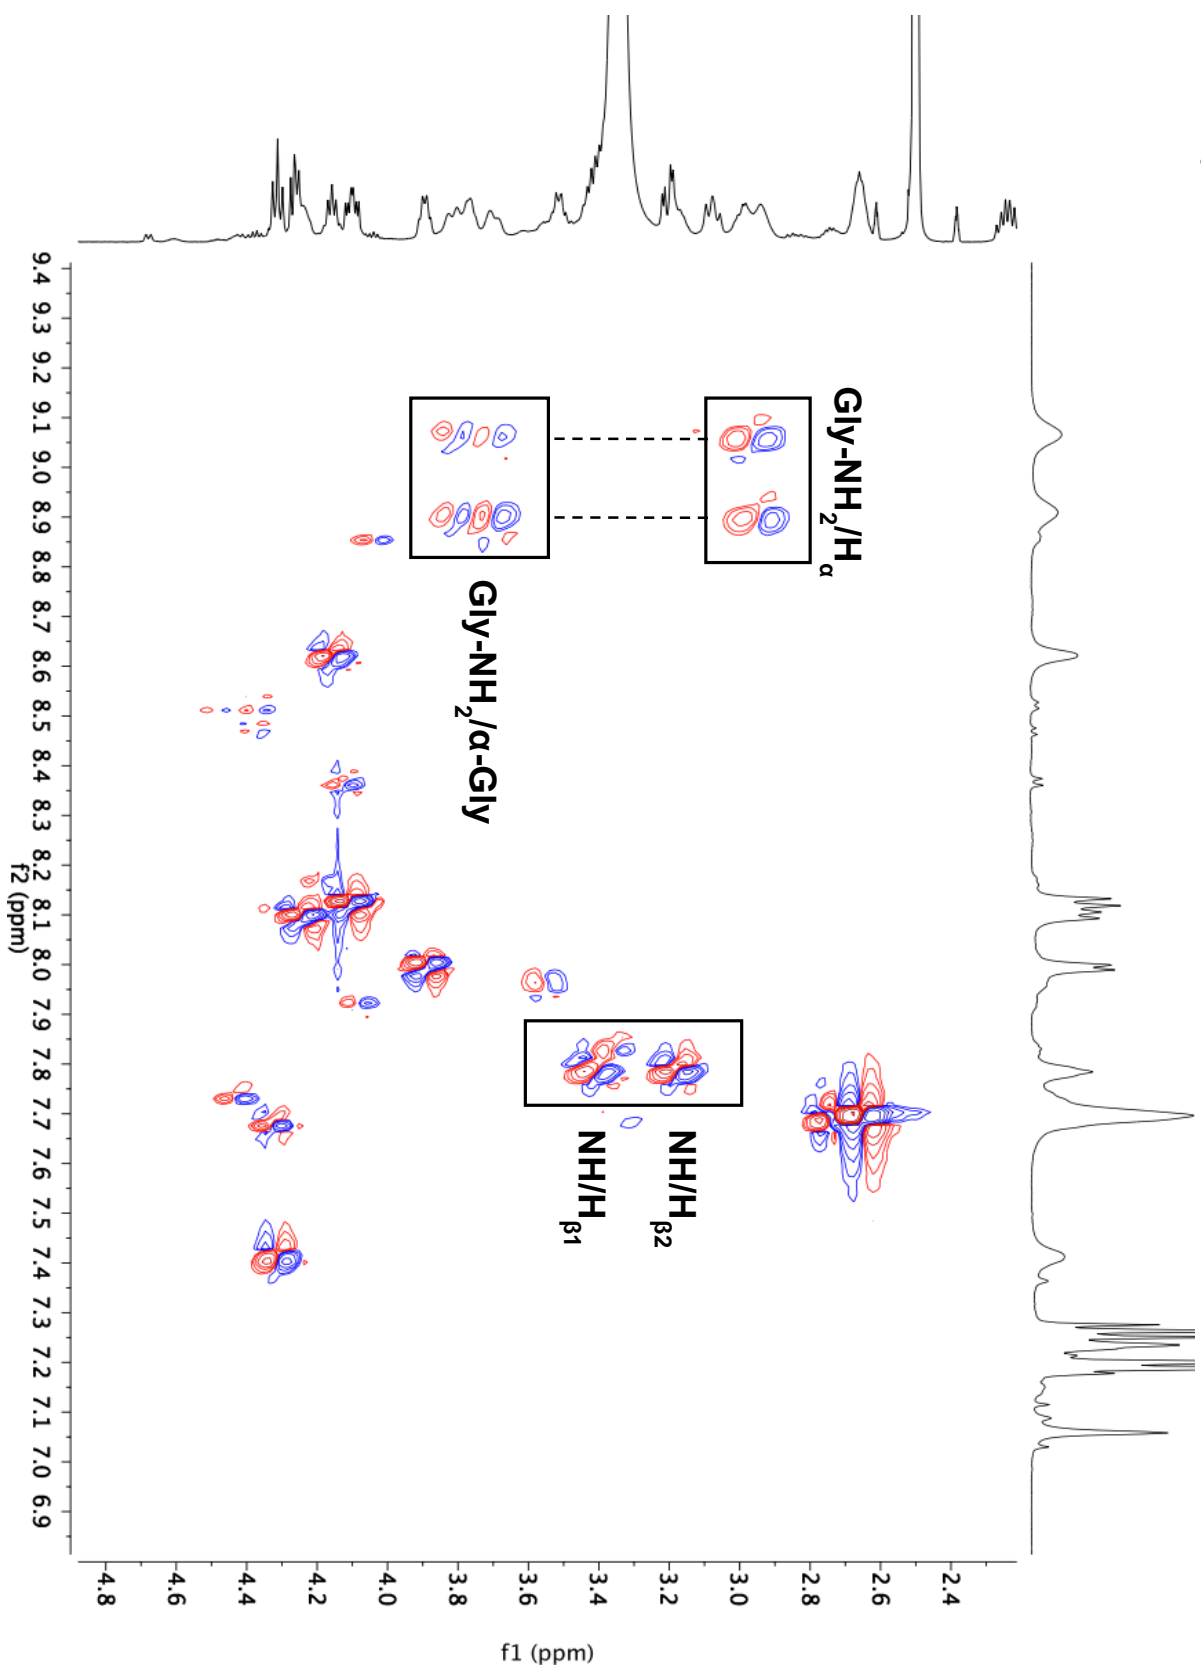

NOESY, DMSO-d<sub>6</sub>, 600 MHz

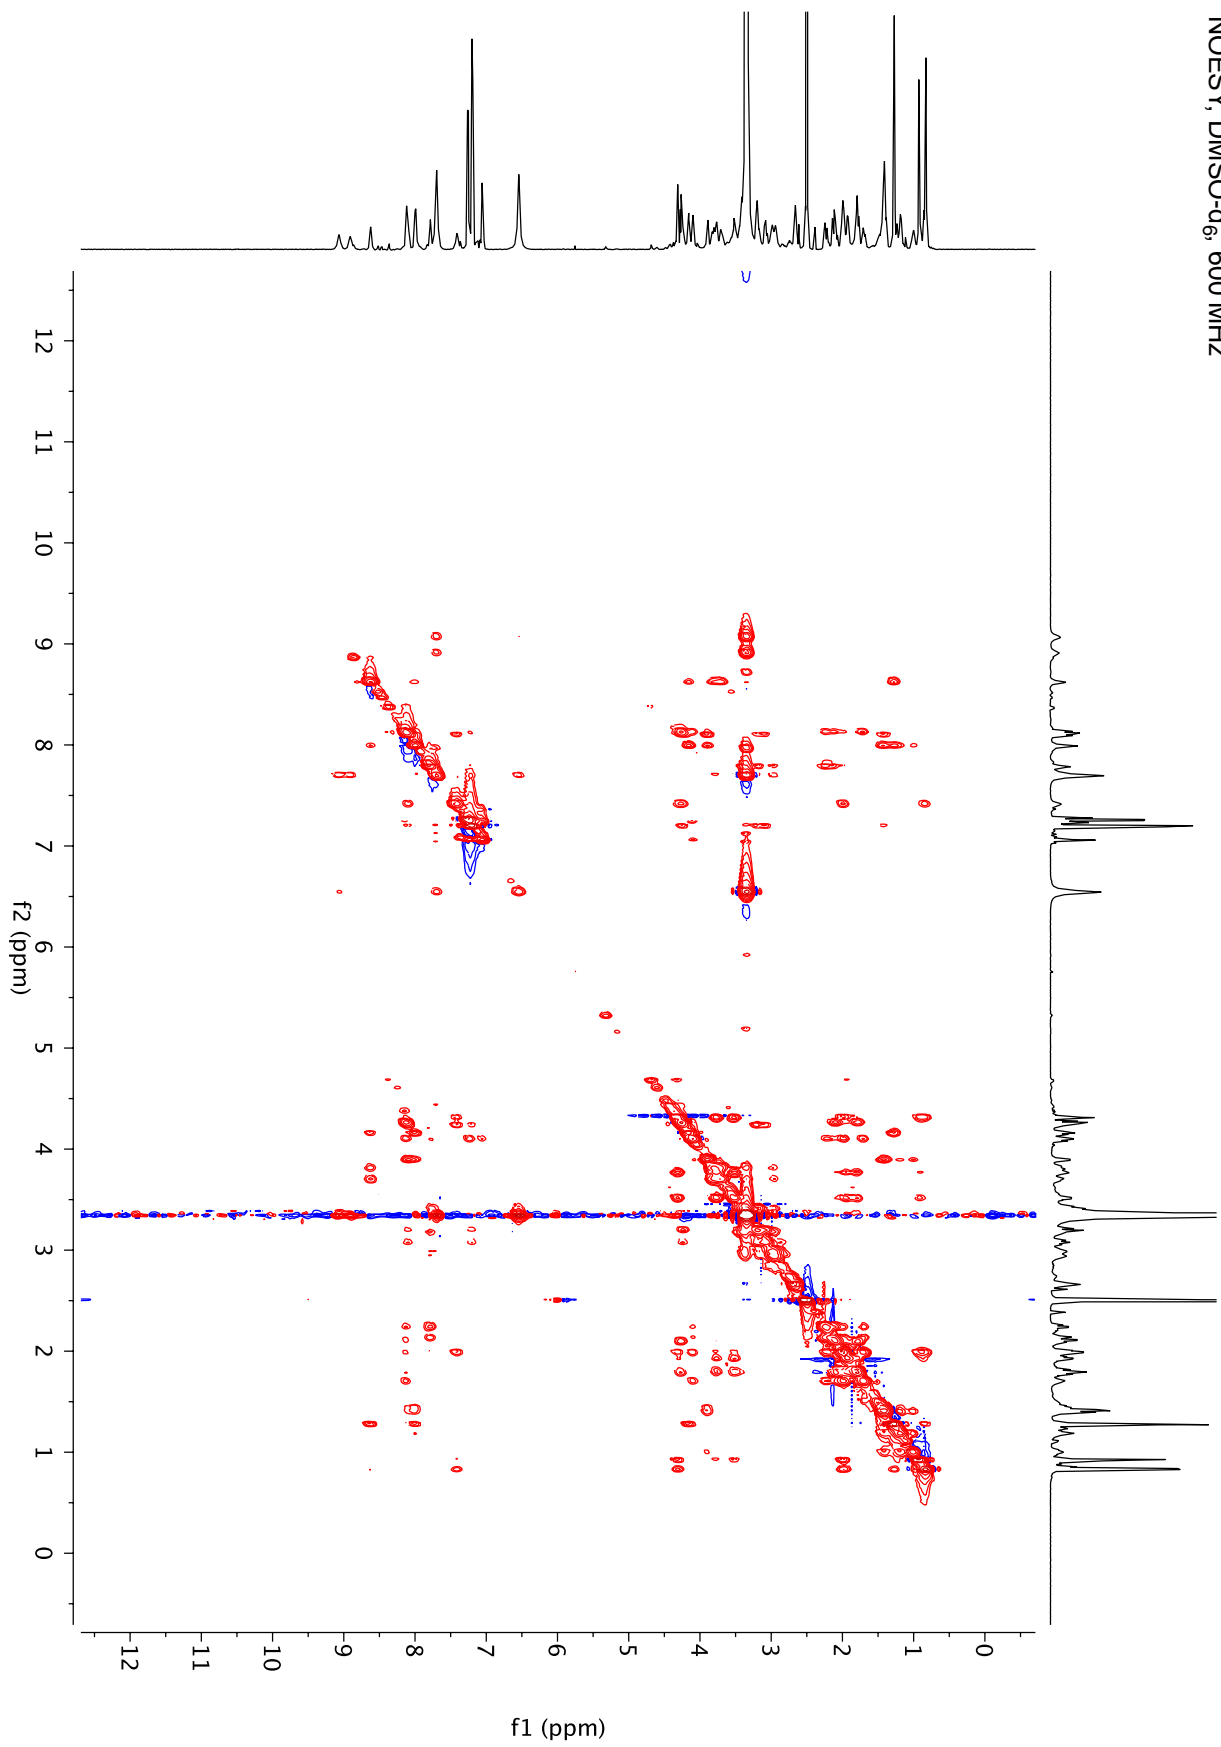

NOESY, DMSO-d<sub>6</sub>, 600 MHz

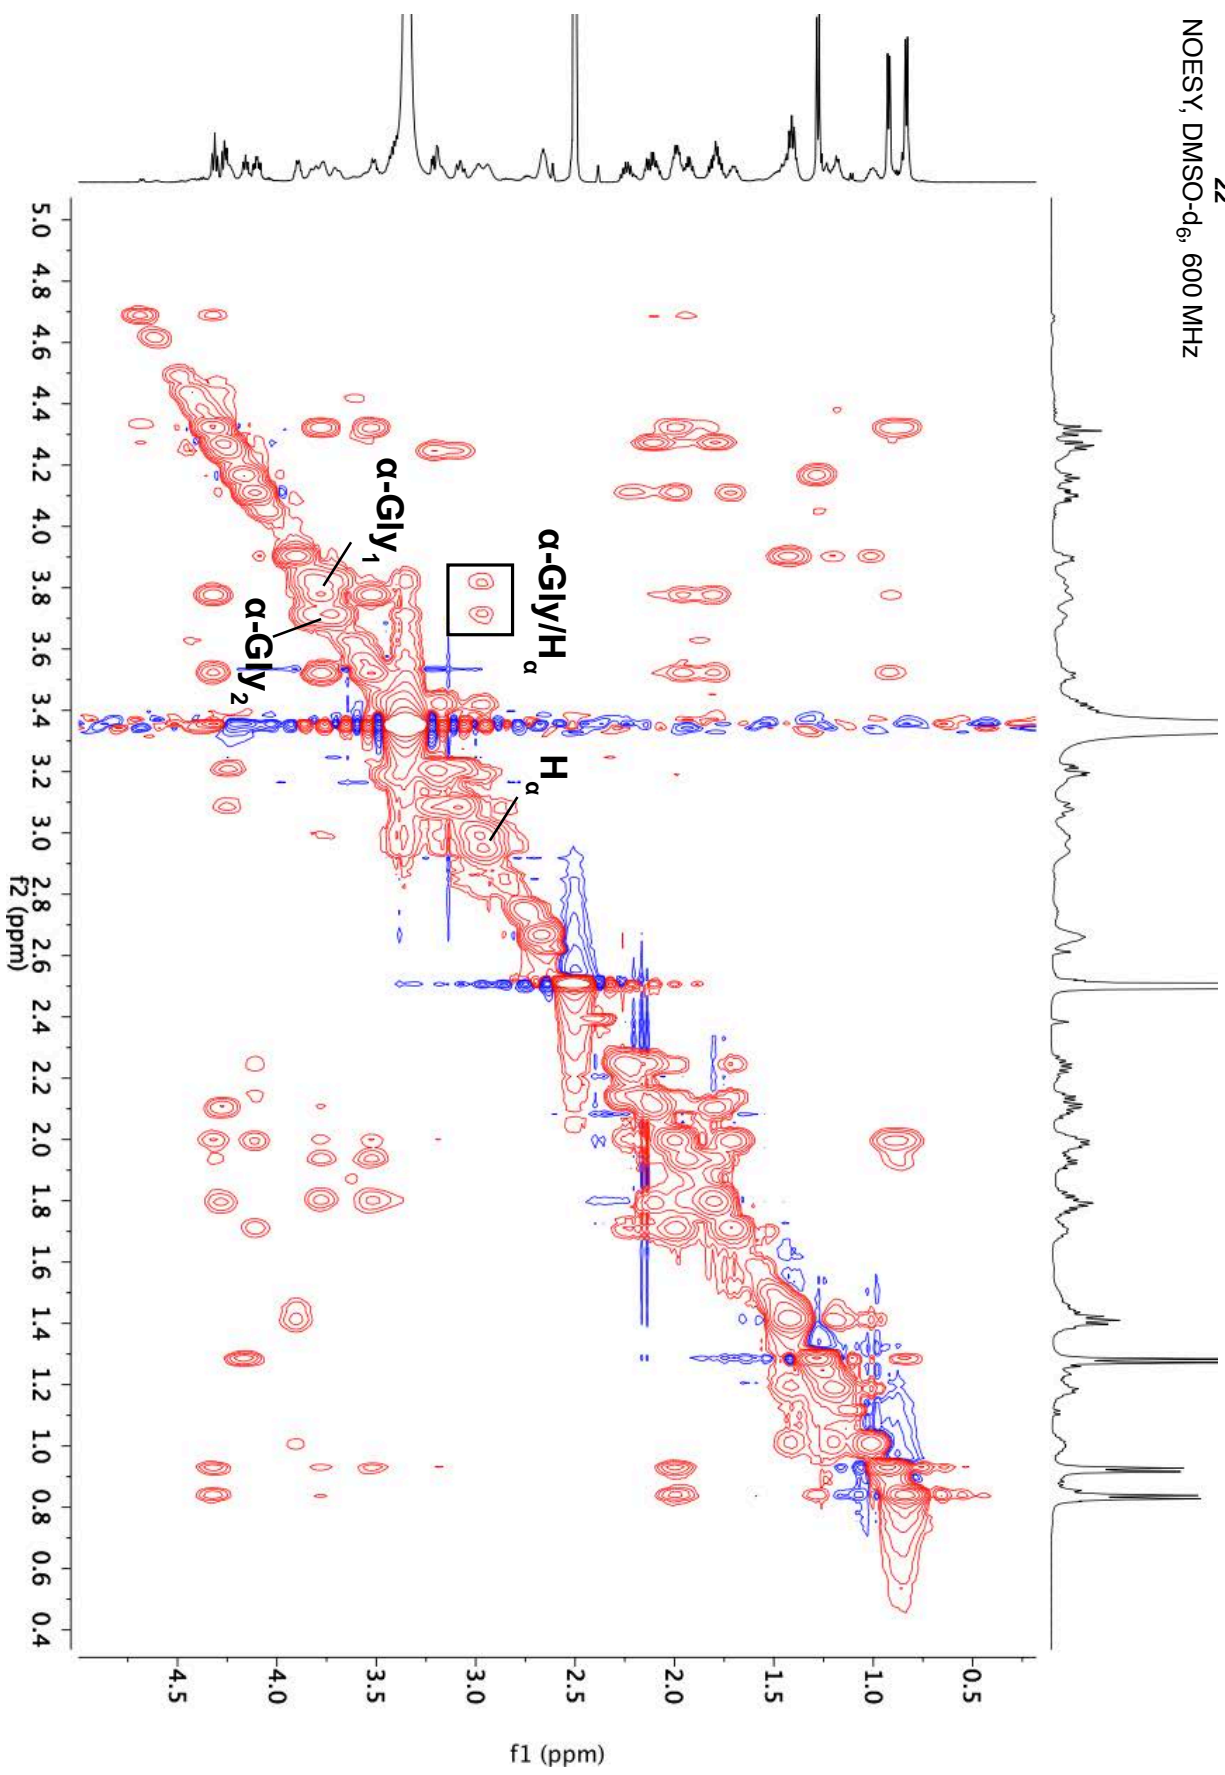

## pH Screen

The reductive amination of peptide **S13** to form macrocycle **22** was studied at a variety of different pH conditions (0.4 M NaOAc buffer, adjusted to pH 3.7, 4.6, and 5.6 and 0.2 M Na<sub>2</sub>HPO<sub>4</sub> buffer, adjusted to pH 7.0). All reactions yielded the same product macrocycle, but the relative amount of reduced aldehyde was sensitive to changes in pH, with the largest amount of aldehyde reduction observed at pH = 3.7. At pH = 7, minor macrocyclic byproducts were also observed. These minor byproducts were not sufficient in intensity to isolate by HPLC.

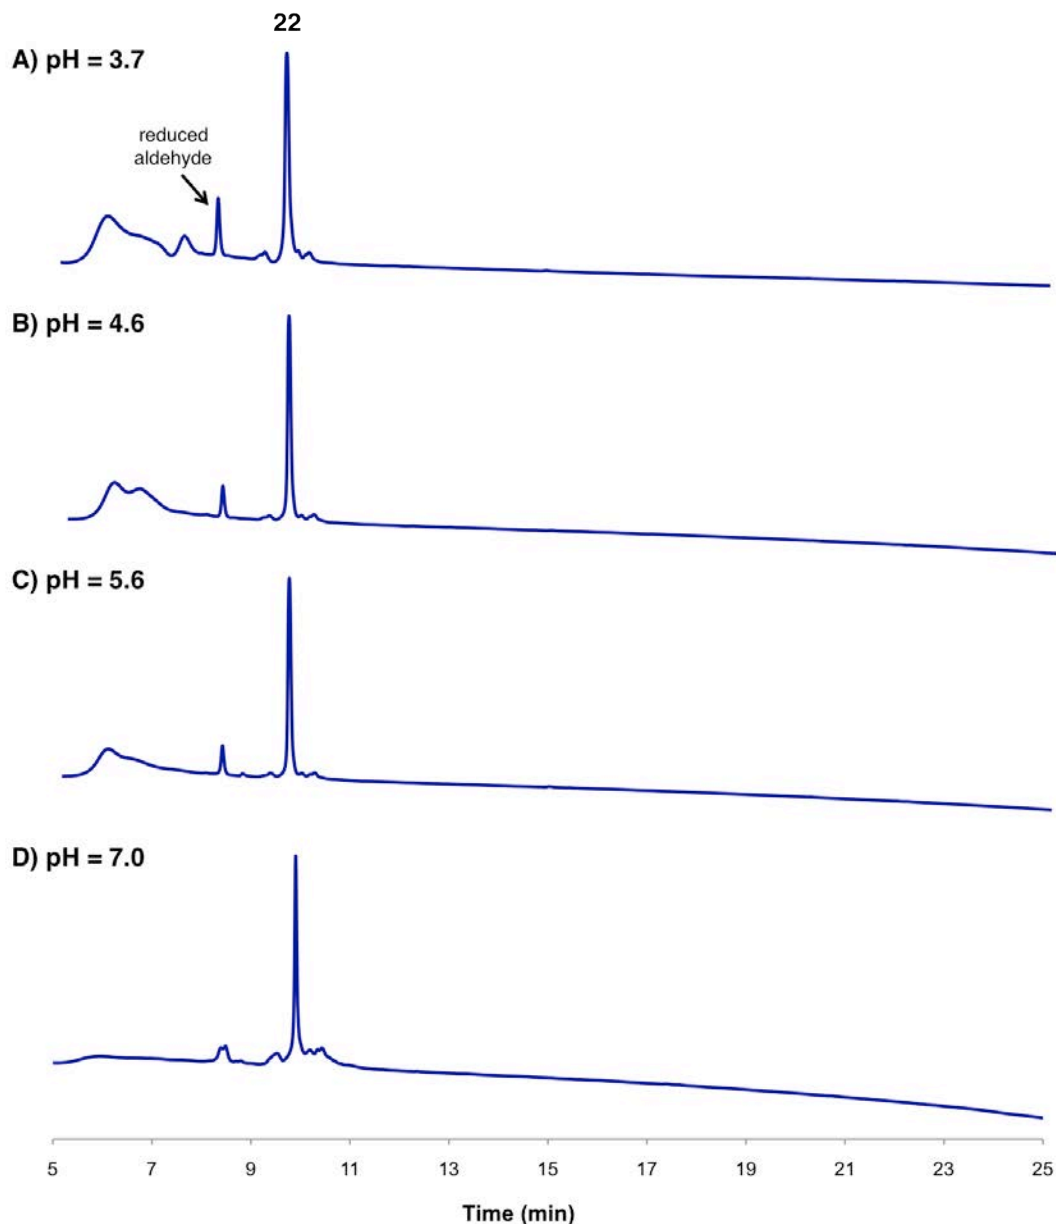

Crude analytical HPLC traces (5 to 100% B over 25 min,  $\lambda = 210$  nm) of the formation of **22** from amino aldehyde **S13** following reductive amination. The reaction was performed in 0.4 M

NaOAc buffer (pH = 3.7, 4.6, or 5.6, 1 mM concentration) or in 0.2 M Na<sub>2</sub>HPO<sub>4</sub> buffer (pH = 7.0, 1 mM concentration). Reactions were run for 16 h at **A**) pH = 3.7, **B**) pH = 4.6, **C**) pH = 5.6, and **D**) pH = 7.0.

*Note: Cyclization of **S13** at the  $\alpha$ -amine outcompetes cyclization at the  $\epsilon$ -amine lysine side-chain at a variety of reaction pH conditions. To ensure that cyclization at the  $\alpha$ -amine does not result from an absolute conformational preference over the side-chain lysine, an N-acetylated linear peptide aldehyde, **S17**, was prepared and subjected to the reductive amination conditions. Without competitive  $\alpha$ -amine cyclization, reaction at the lysine side-chain was observed by analytical HPLC and LC-MS, although the reaction at pH = 5.7 was considerably slower, resulting in the formation of substantial reduced aldehyde and linear cyanohydrin:*

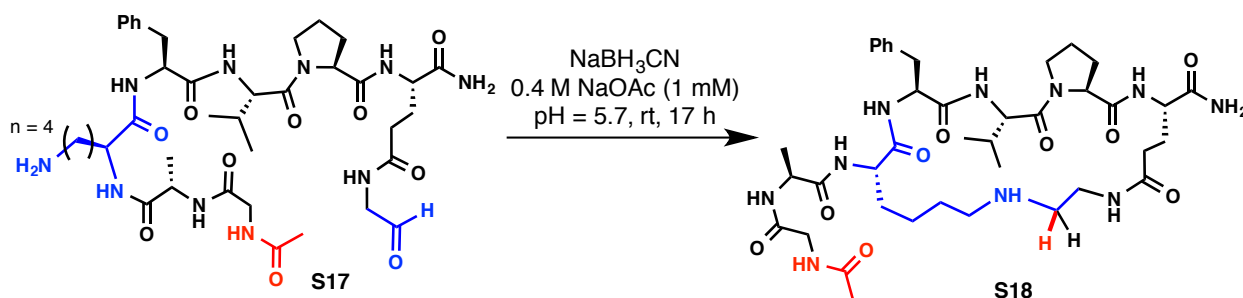

Peptide **S18** was prepared on an analytical scale according to general procedure 4 from linear amino aldehyde **S17**. At t = 17 h, the reaction was monitored by LC-MS and analytical HPLC to determine the extent of macrocyclization.

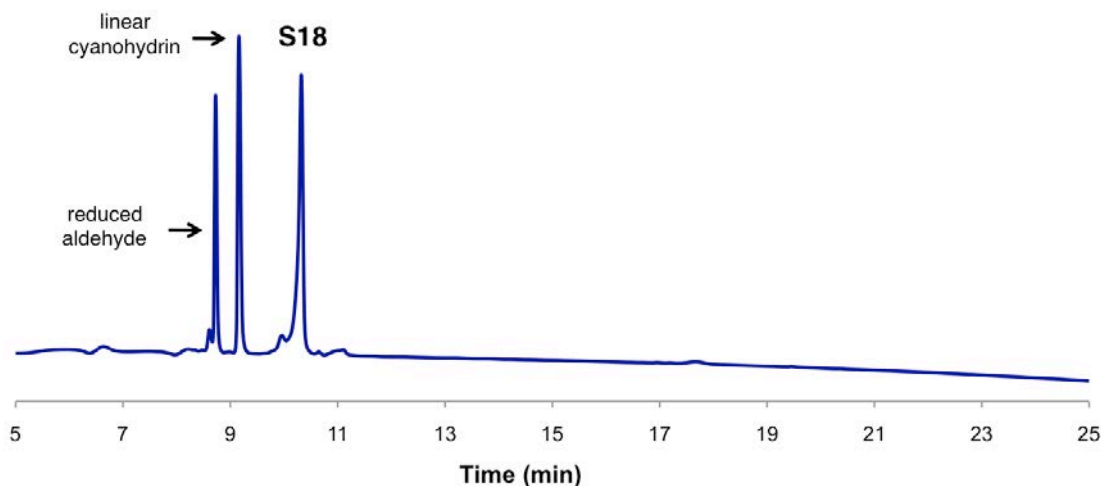

Crude analytical HPLC trace (5 to 100% B over 25 min,  $\lambda = 210$  nm) of the formation of **S18** from amino aldehyde **S17** following reductive amination.

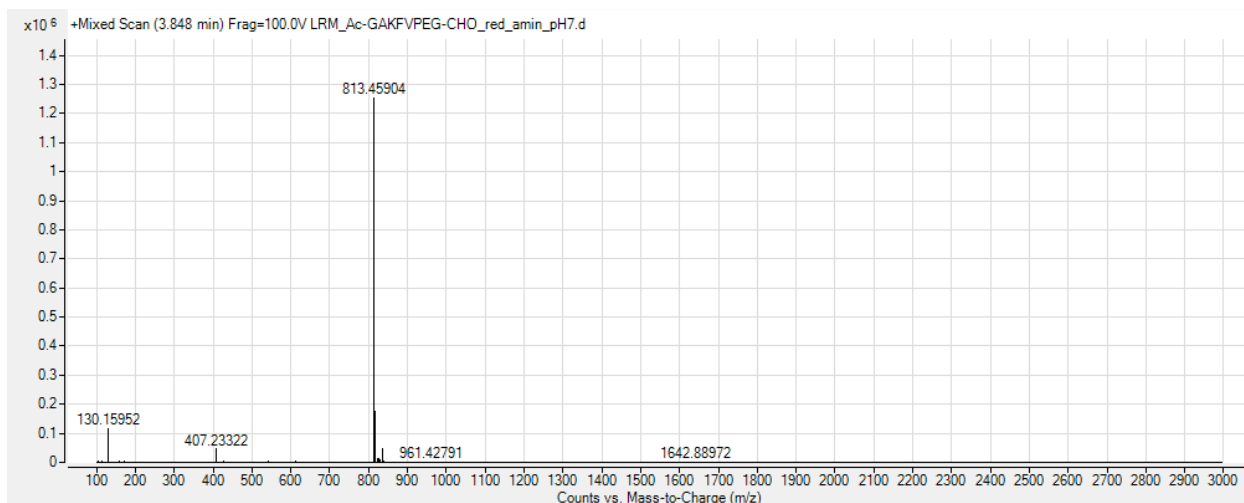

**LRMS (ESI-TOF):** calc'd for C<sub>39</sub>H<sub>61</sub>N<sub>10</sub>O<sub>9</sub> [M+H]<sup>+</sup> 813.46; found 813.46.

## Peptide 23

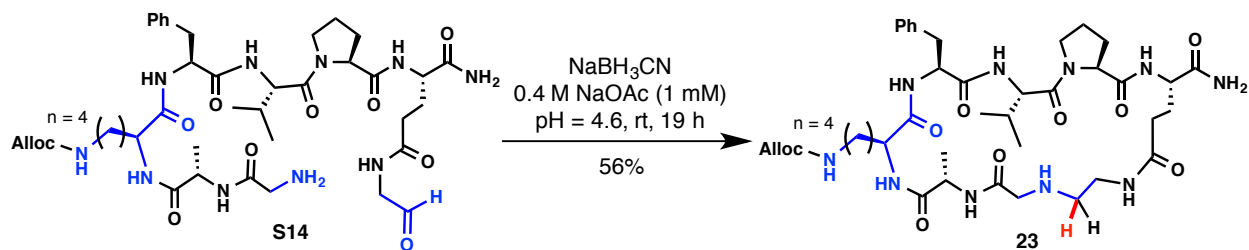

Peptide **23** was prepared according to general procedure 4 from linear amino aldehyde **S14** (4.4 mg, 5.1  $\mu\text{mol}$ ). At  $t = 19$  h, the reaction was purified by preparative reverse-phase HPLC (20% B for 5 min, then 20% to 55% B over 25 min) to afford peptide macrocycle **23** (2.4 mg, 56% yield) as a white solid following lyophilization.

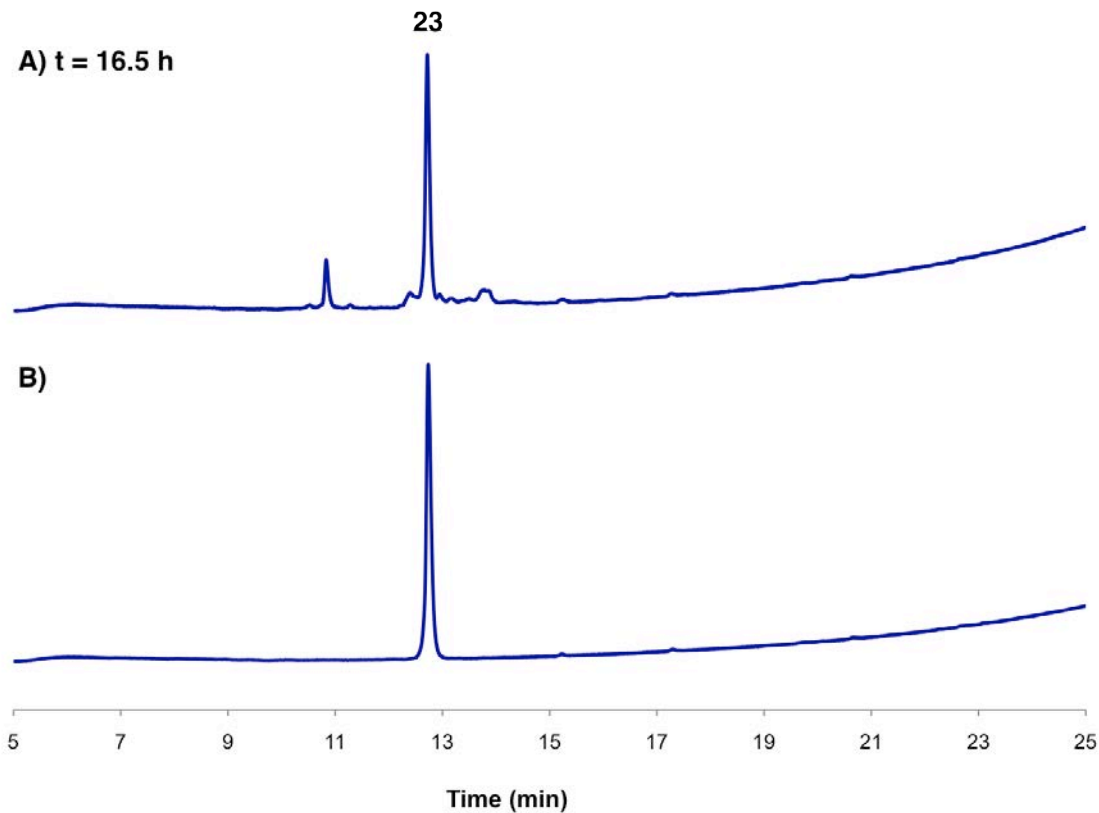

**A)** Crude analytical HPLC trace of the formation of **23** from amino aldehyde **S14** following reductive amination (5 to 100% B over 25 min,  $\lambda = 230$  nm). **B)** Purified peptide **23** ( $R_t = 12.7$  min, 5 to 100% B over 25 min,  $\lambda = 230$  nm).

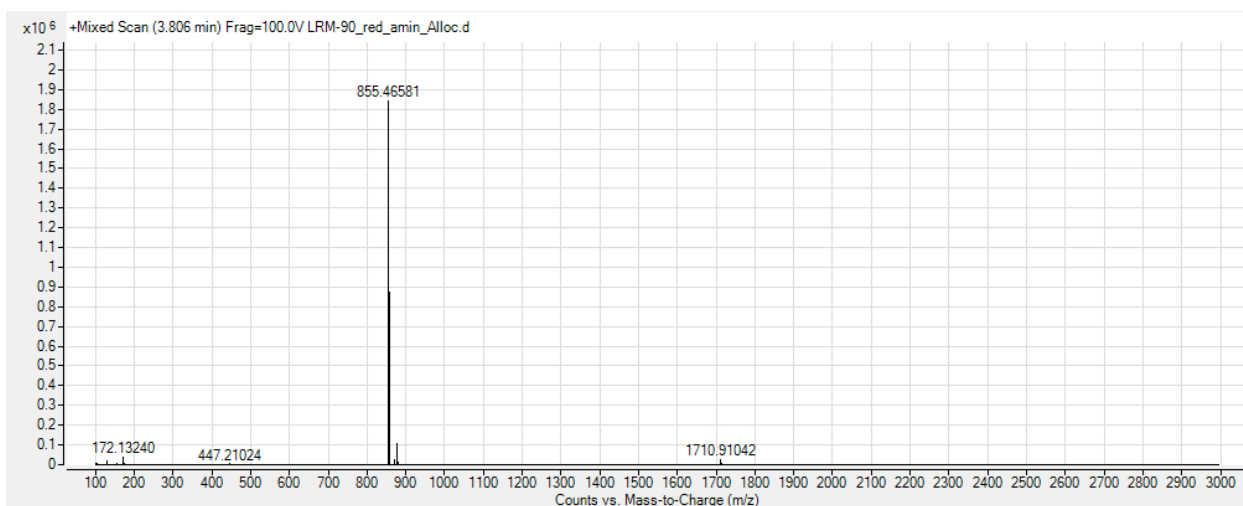

**LRMS (ESI-TOF):** calc'd for  $C_{41}H_{63}N_{10}O_{10}$   $[M+H]^+$  855.47; found 855.47.



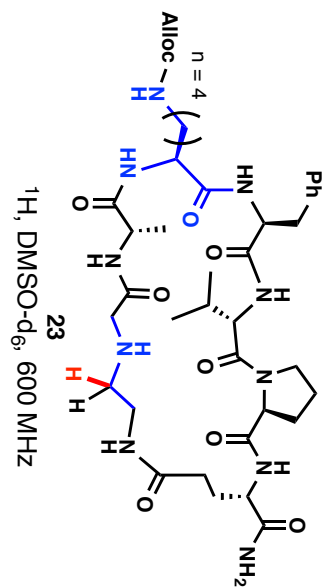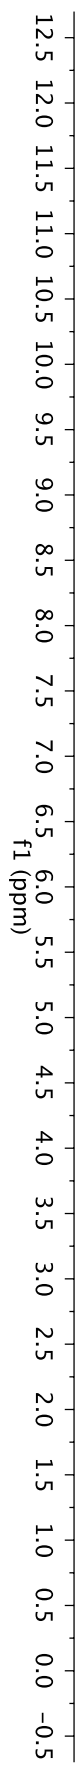

23  
COSY, DMSO-d<sub>6</sub>, 600 MHz

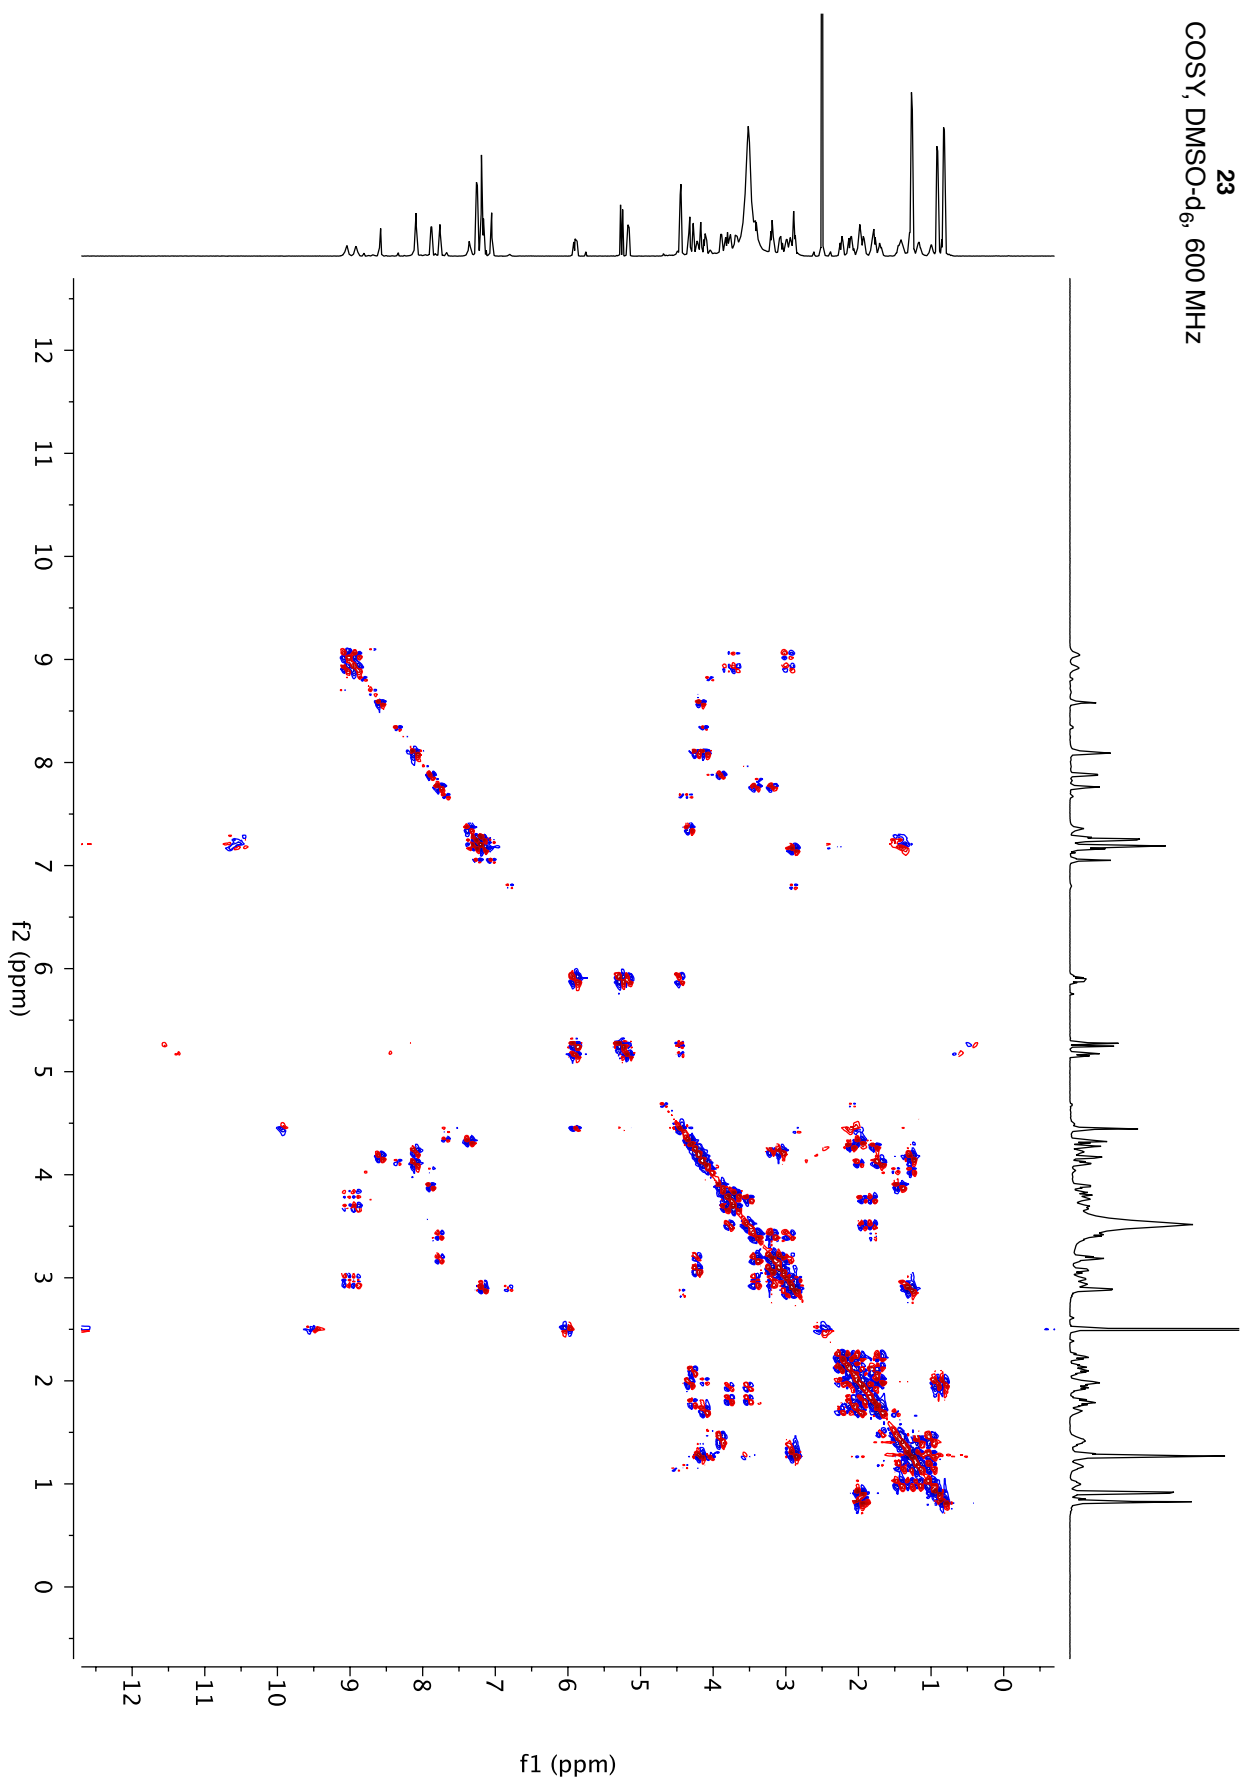

S190

**23**  
ROESY, DMSO-d<sub>6</sub>, 600 MHz

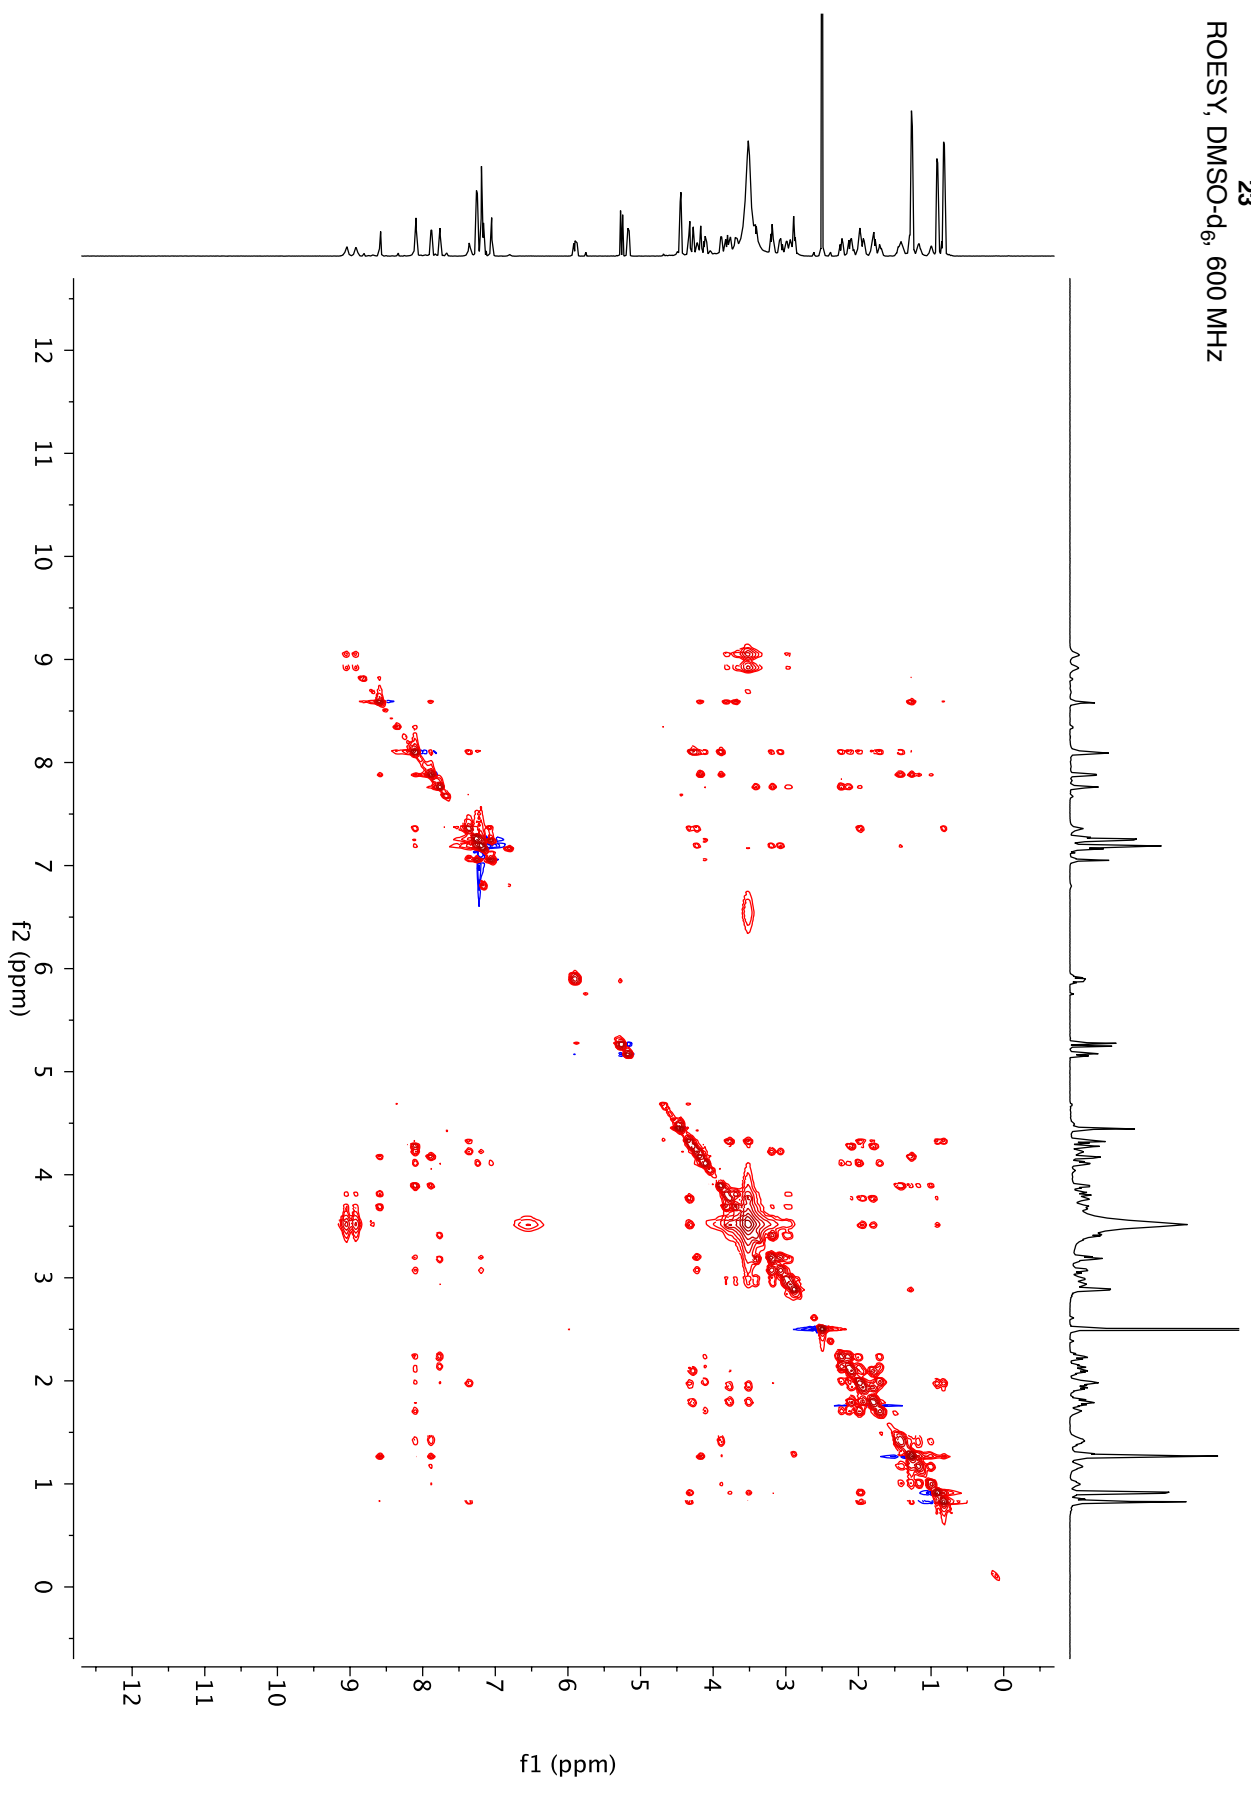

## Peptide 24

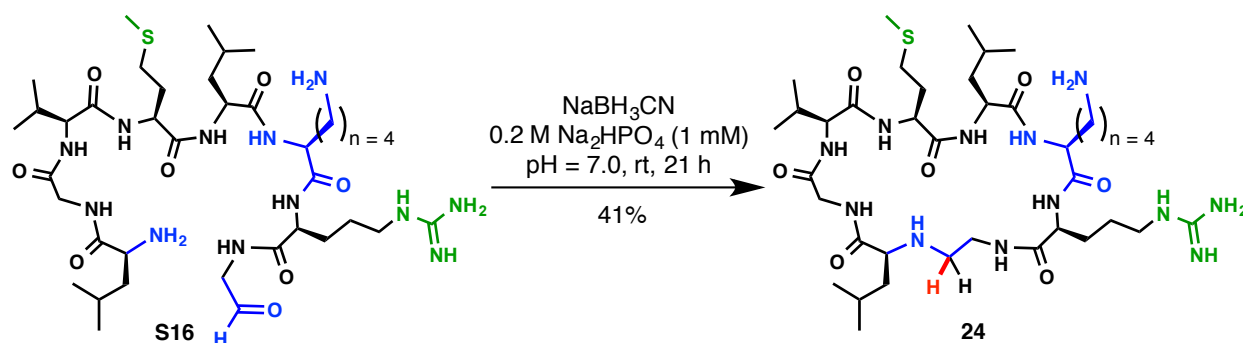

Peptide **24** was prepared according to general procedure 4 from linear amino aldehyde **S16** (2.5 mg, 2.9  $\mu$ mol). The peptide aldehyde was solubilized in 0.2 M Na<sub>2</sub>HPO<sub>4</sub> (pH = 7.0). At t = 21 h, the reaction was purified by preparative reverse-phase HPLC (15% B for 5 min, then 15% to 50% B over 30 min) to afford peptide macrocycle **24** (1.0 mg, 41% yield) as a white solid following lyophilization.

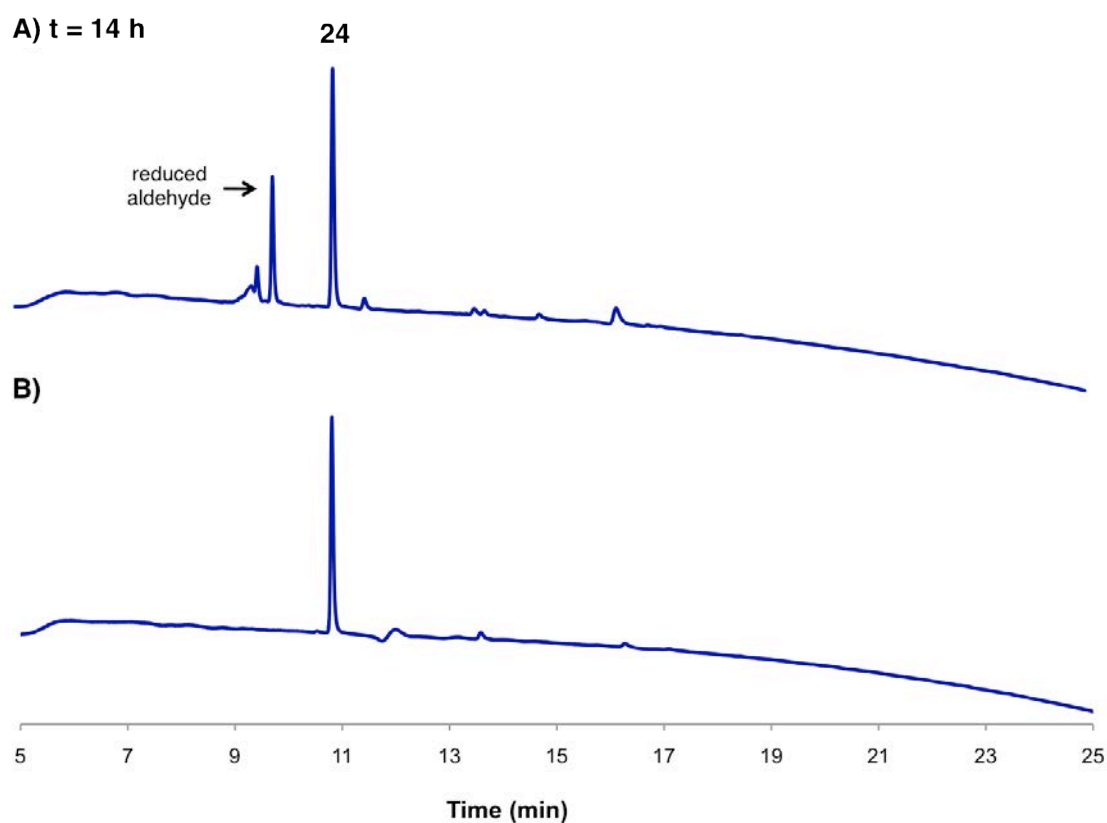

**A)** Crude analytical HPLC trace of the formation of **24** from amino aldehyde **S16** following reductive amination (5 to 100% B over 25 min,  $\lambda$  = 210 nm). **B)** Purified peptide **24** (Rt = 10.8 min, 5 to 100% B over 25 min,  $\lambda$  = 210 nm).

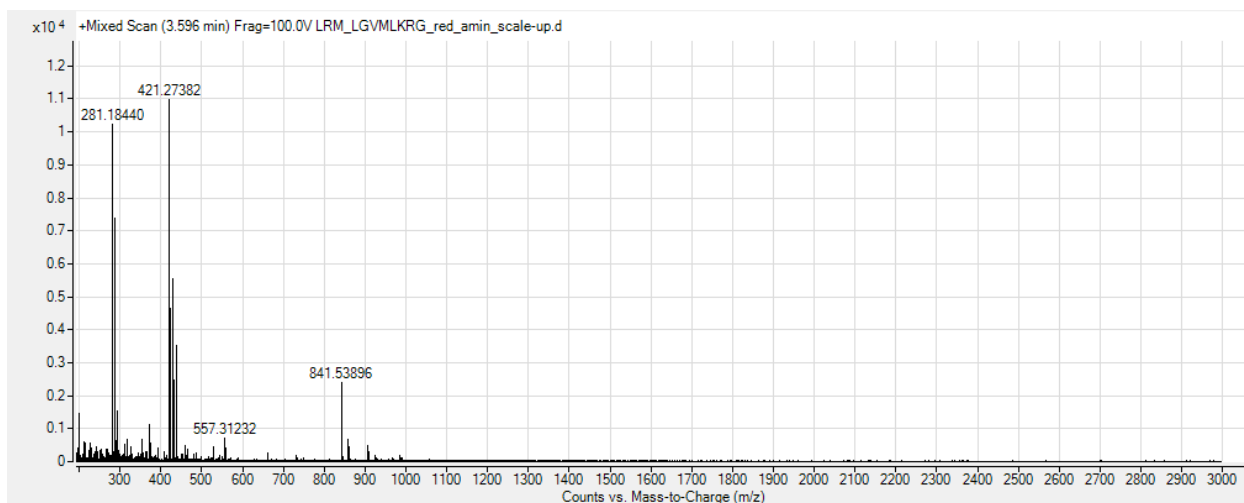

**LRMS (ESI-TOF):** calc'd for C<sub>38</sub>H<sub>73</sub>N<sub>12</sub>O<sub>7</sub>S [M+H]<sup>+</sup> 841.54; found 841.54, [M+2H]<sup>2+</sup> 421.28; found 421.27, [M+3H]<sup>3+</sup> 281.19; found 281.18.

**Partial 2D NMR Correlations:**

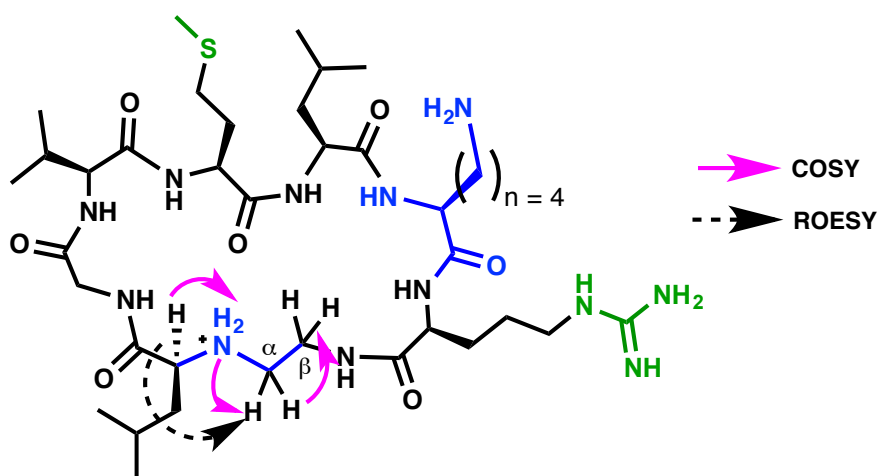

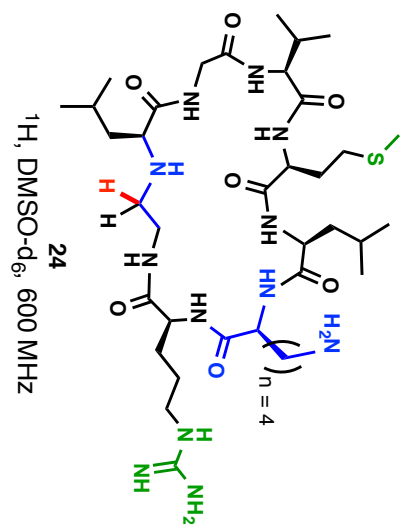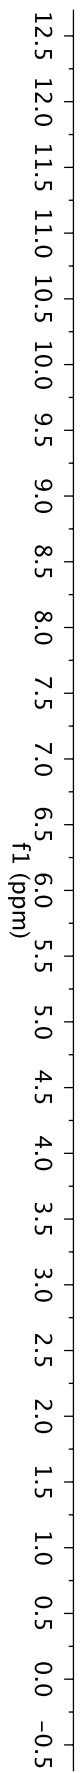

24  
COSY, DMSO-d<sub>6</sub>, 600 MHz

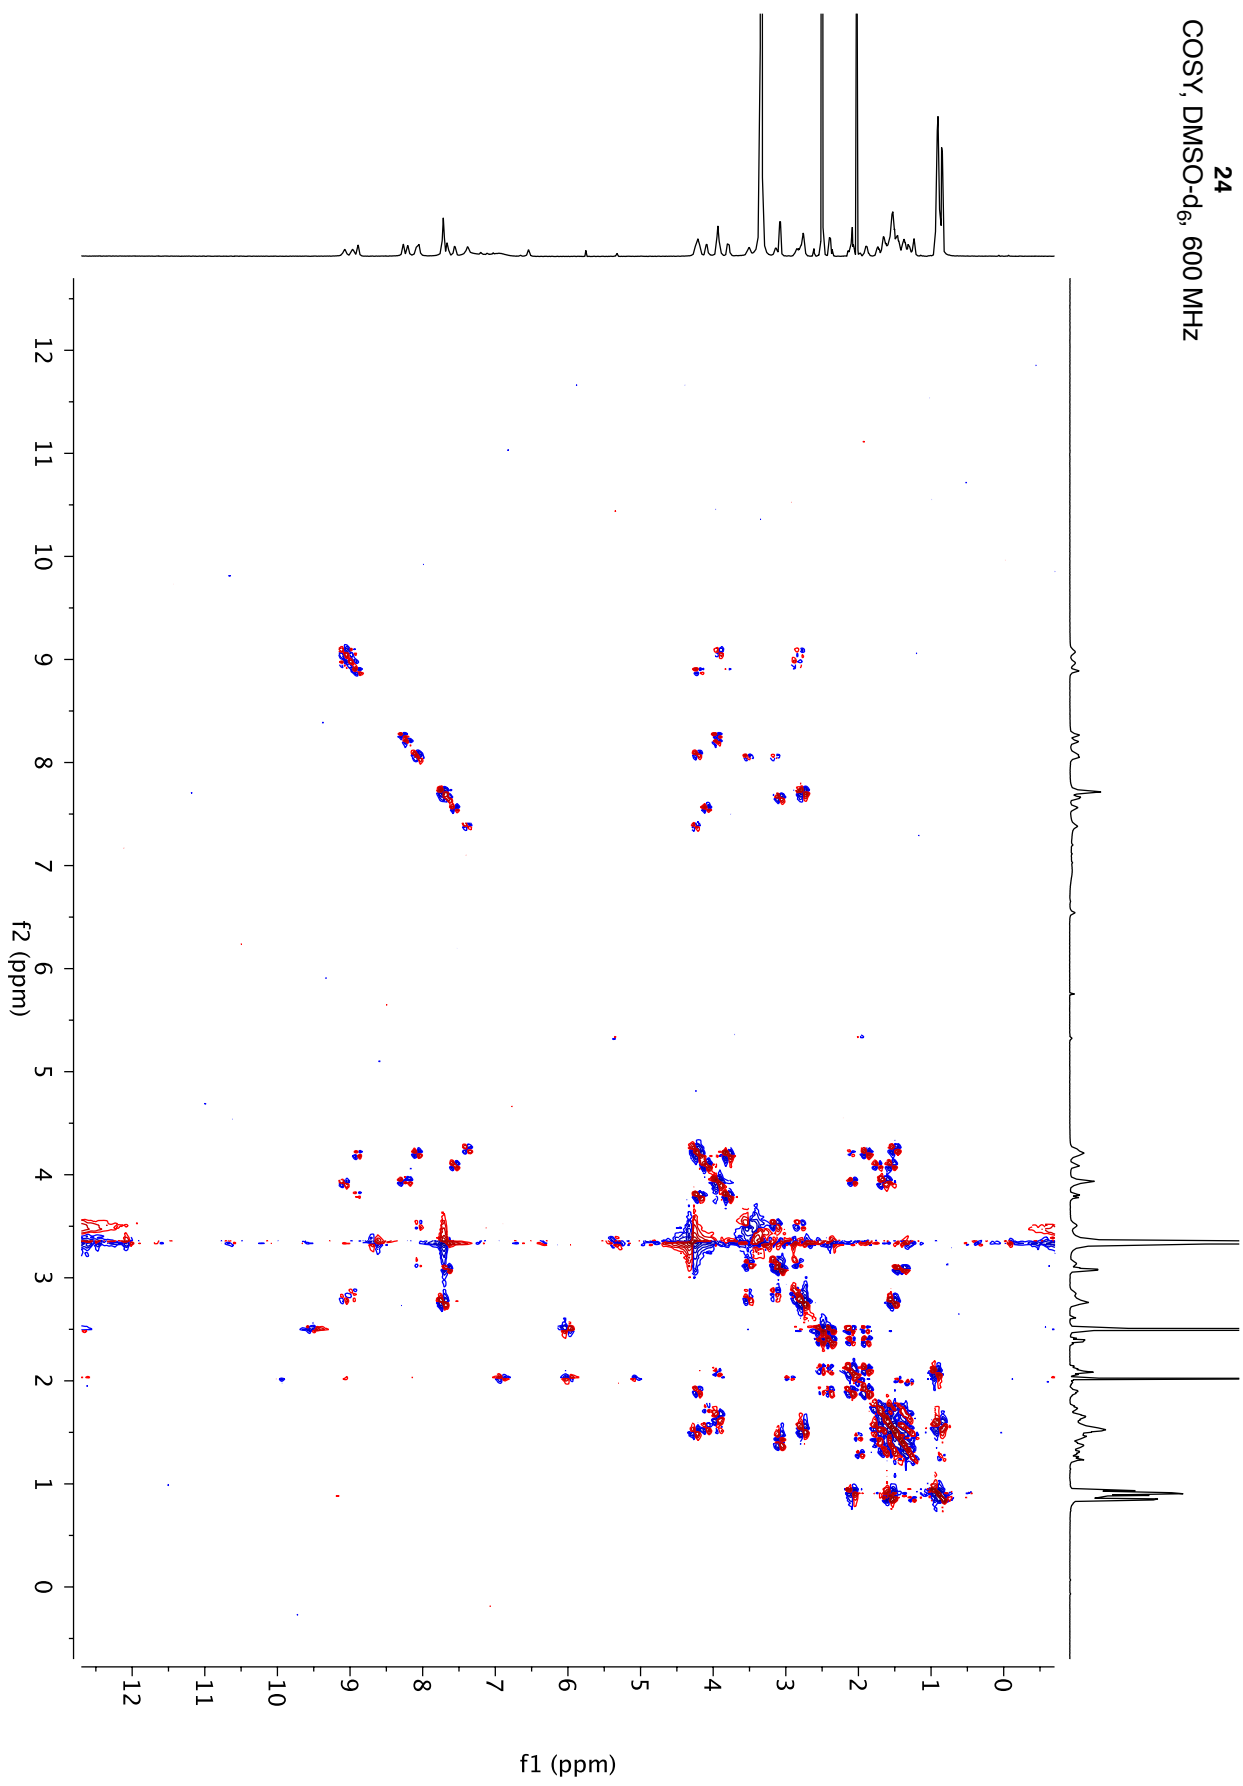

24  
COSY, DMSO-d<sub>6</sub>, 600 MHz

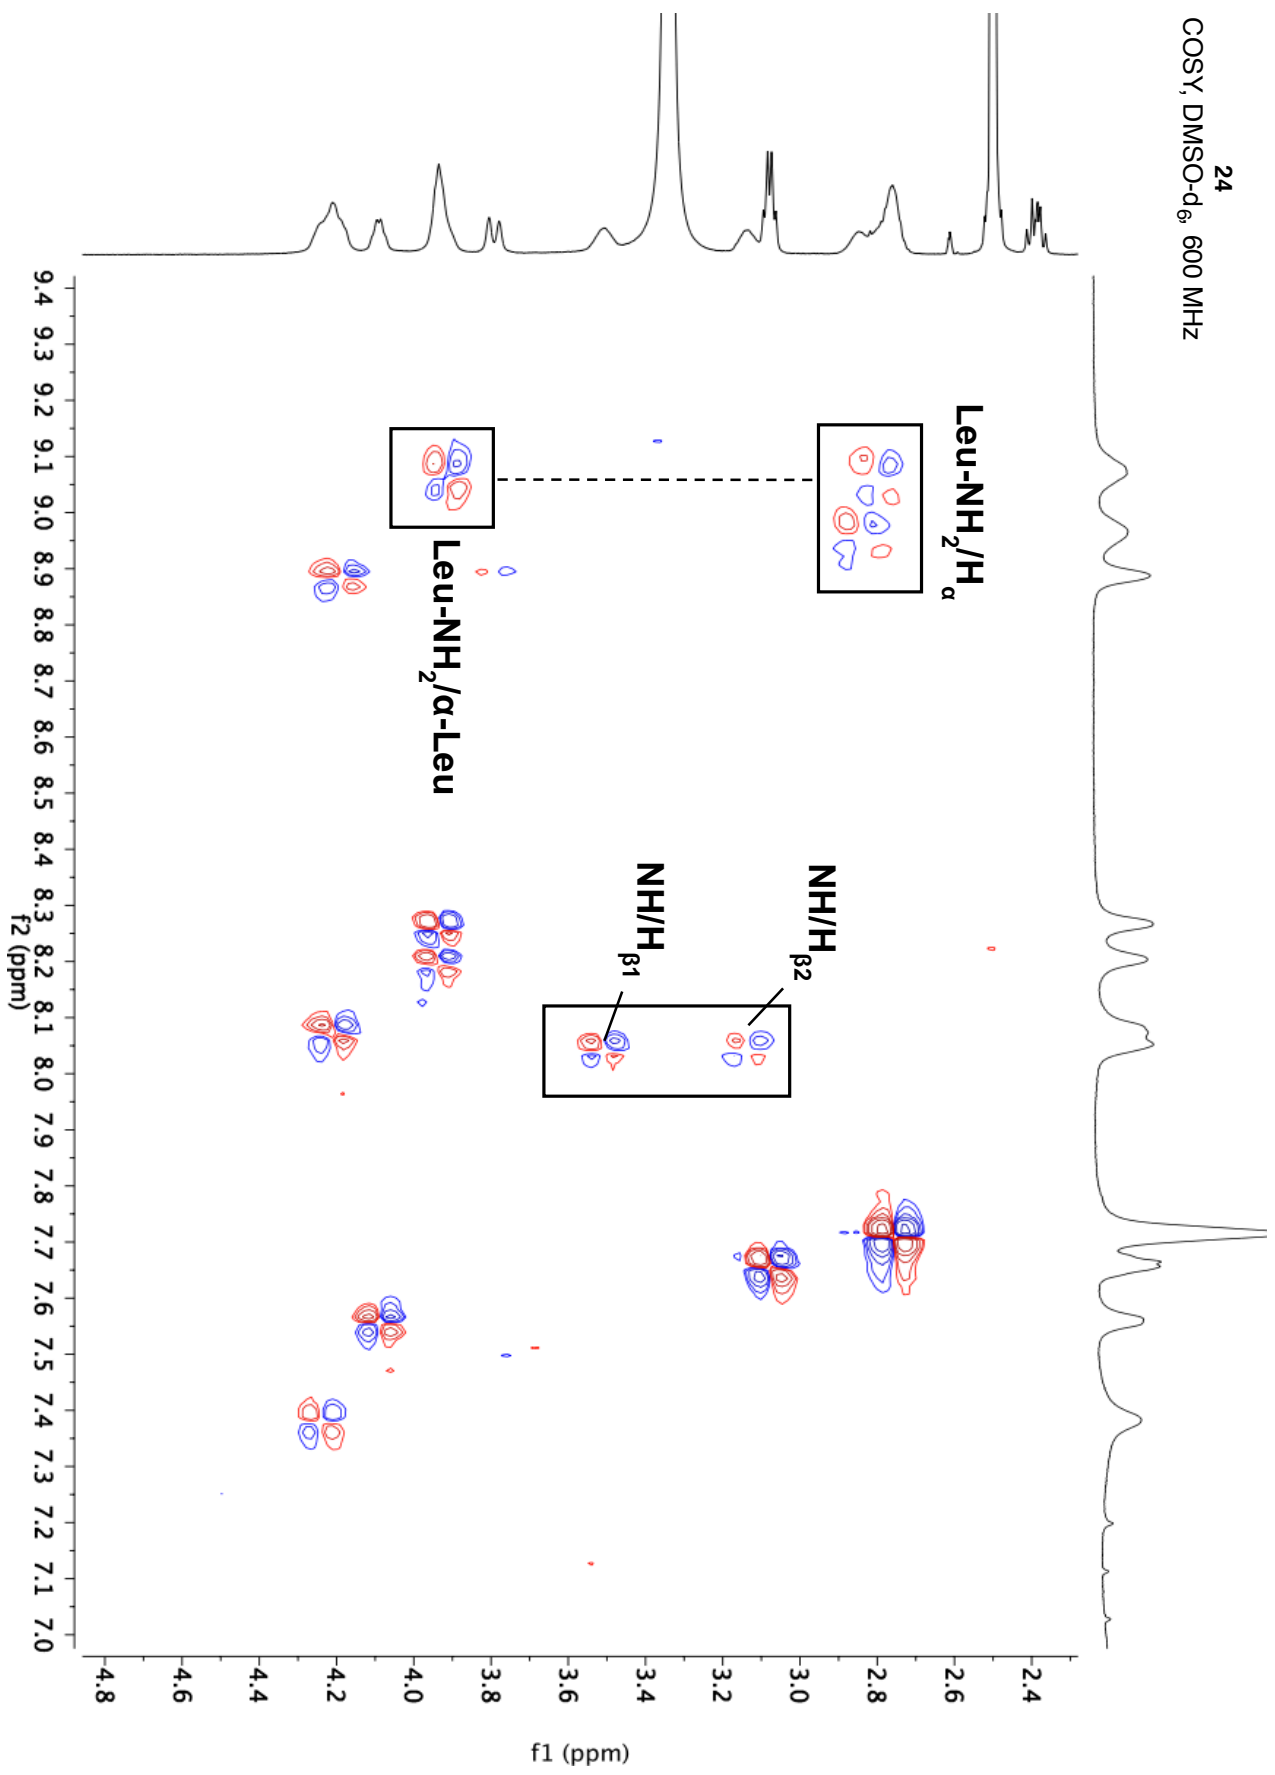



24  
ROESY, DMSO-d<sub>6</sub>, 600 MHz

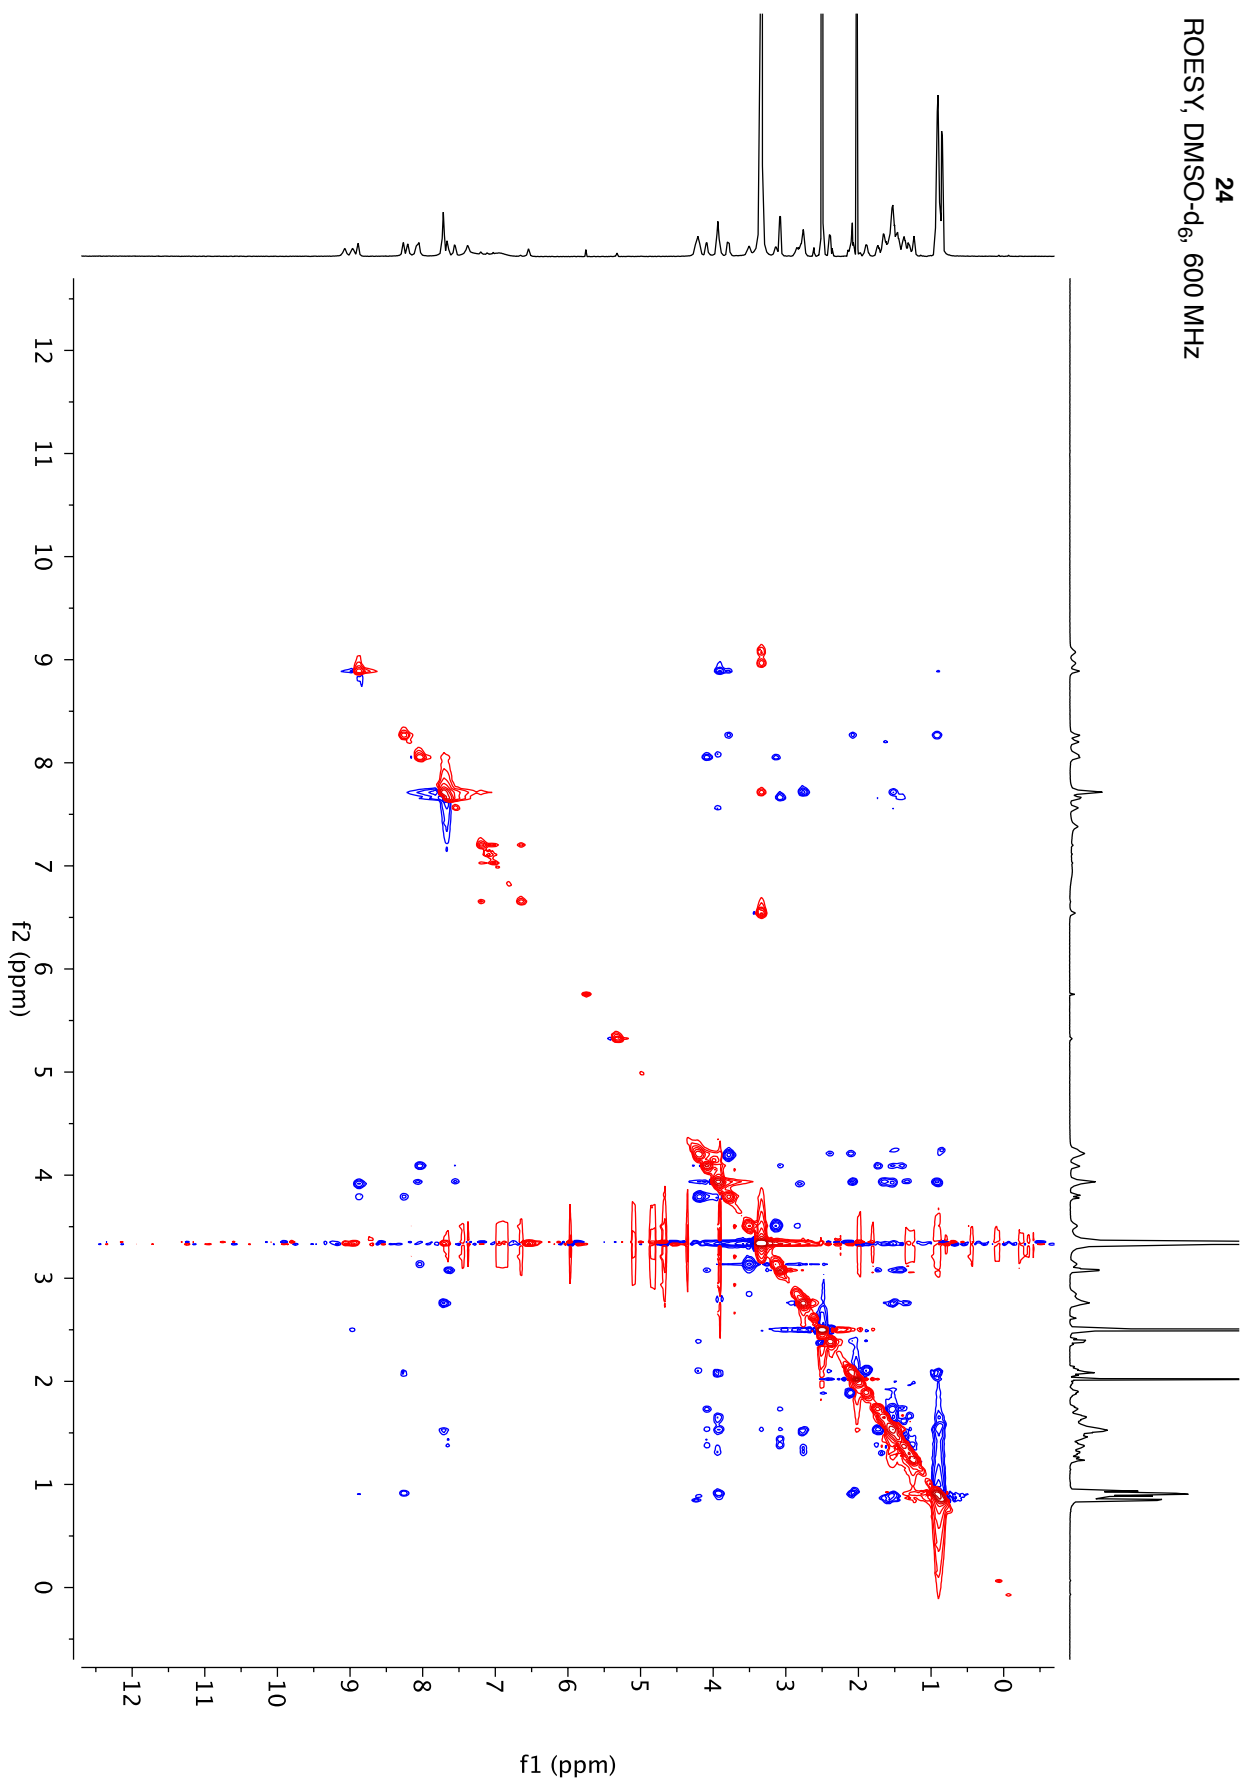

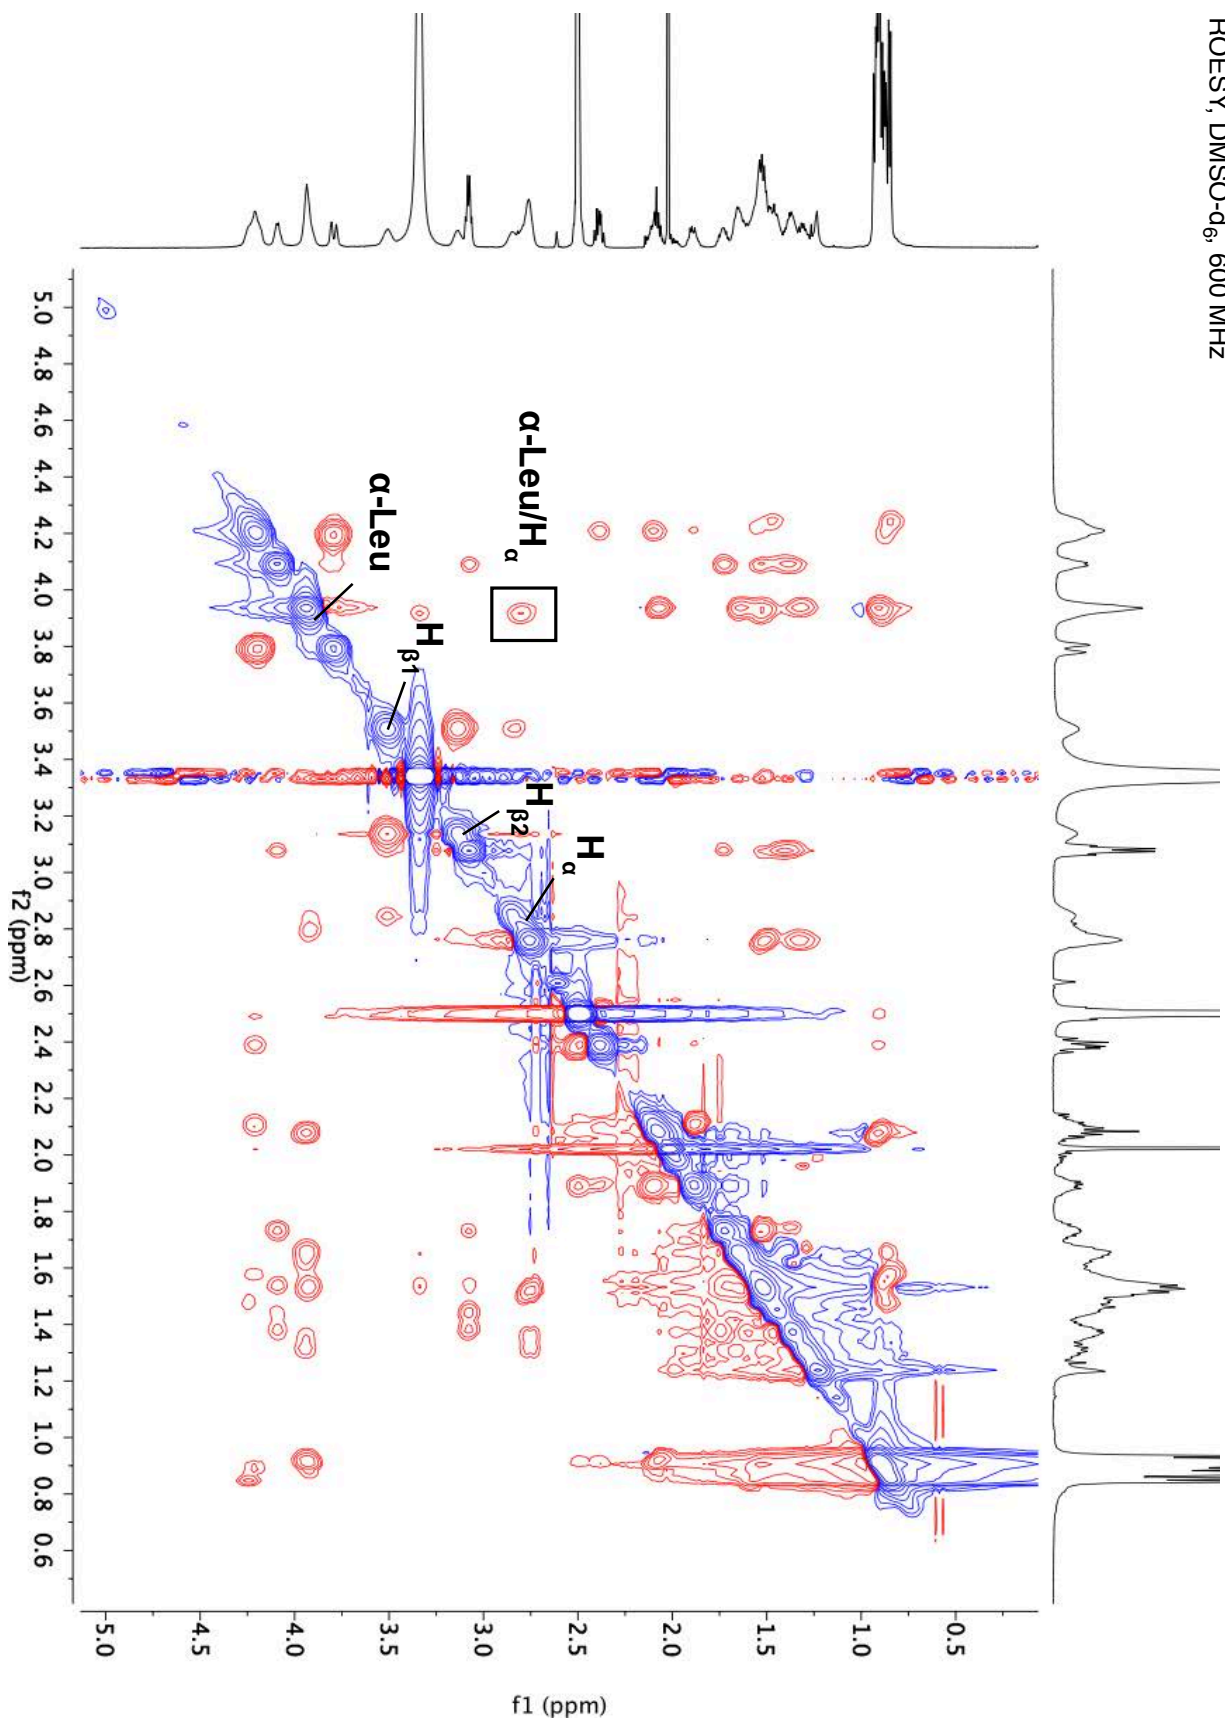

## Characterization Data for Introduction of Bioorthogonal Handles

### Peptide 25

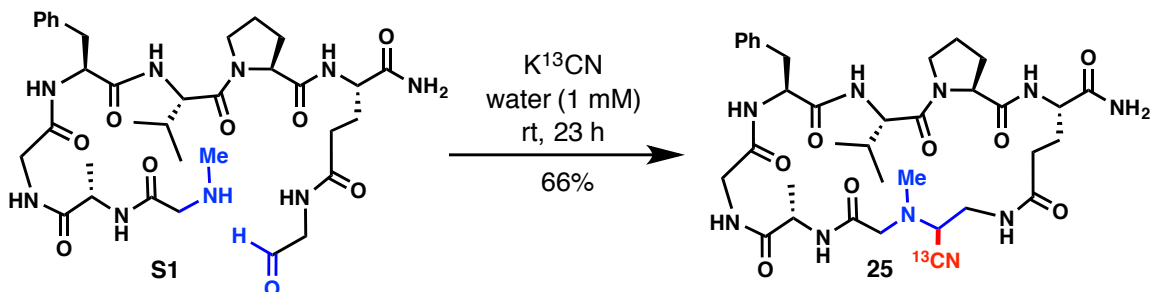

Peptide **25** was prepared with  $K^{13}CN$  according to general procedure 3 from linear amino aldehyde **S1** (1.5 mg, 2.1  $\mu$ mol). At  $t = 23$  h, the reaction was purified by preparative reverse-phase HPLC (20% B for 5 min, then 20% to 50% B over 30 min) to afford isotope-labeled peptide macrocycle **25** (1.0 mg, 66% yield) as a mixture of diastereomers and as a white solid following lyophilization.

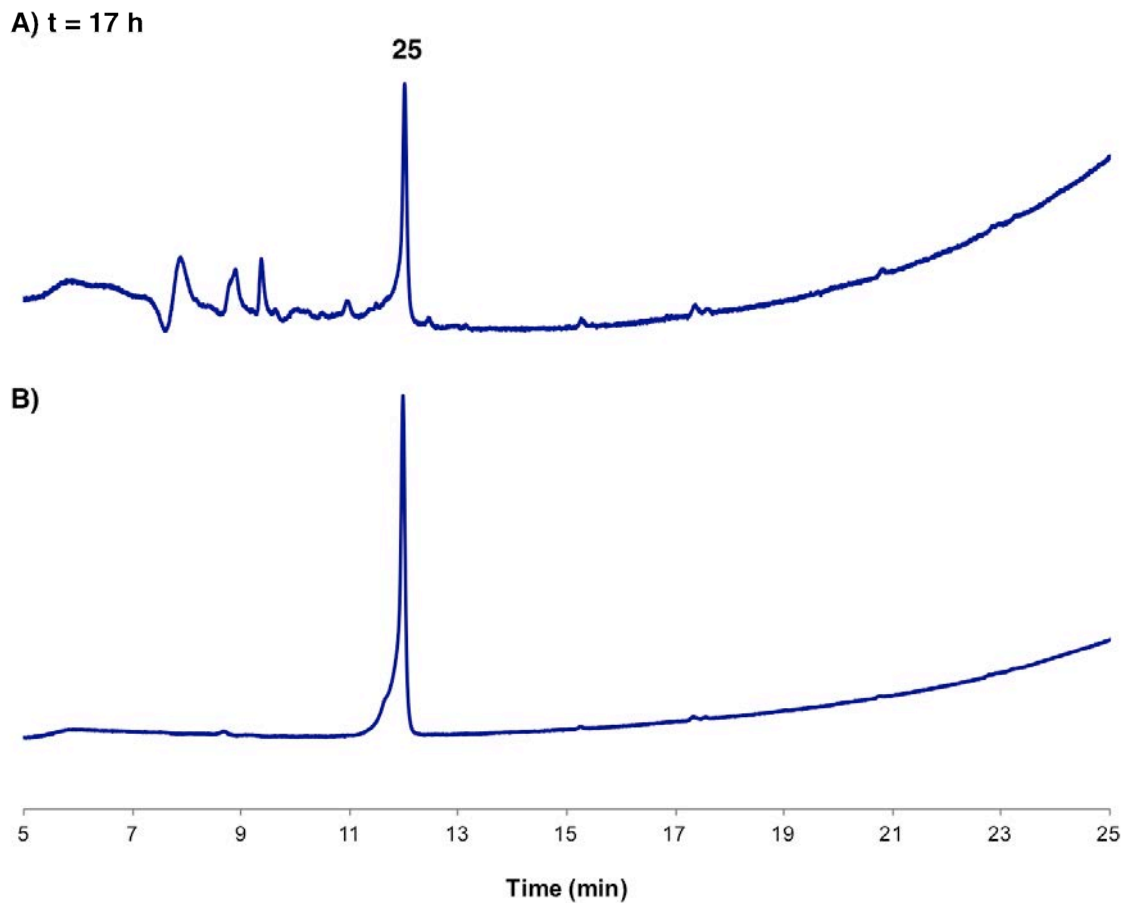

**A)** Crude analytical HPLC trace of the formation of **25** from amino aldehyde **S1** following Strecker macrocyclization with  $K^{13}CN$  (5 to 100% B over 25 min,  $\lambda = 230$  nm). **B)** Purified peptide **25** ( $R_t = 12.0$  min, 5 to 100% B over 25 min,  $\lambda = 230$  nm).

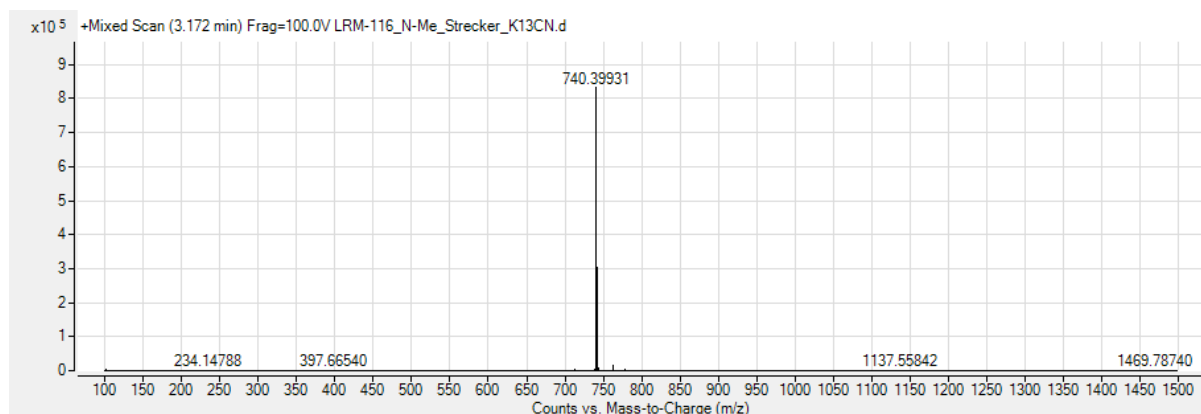

**LRMS (ESI-TOF):** calc'd for  $C_{34}^{13}CH_{51}N_{10}O_8$   $[M+H]^+$  740.39; found 740.40.

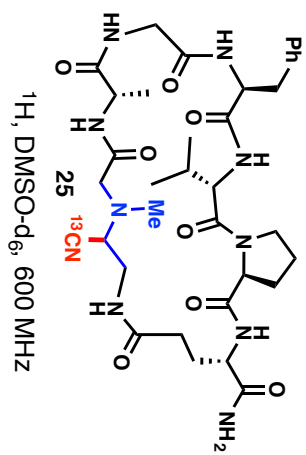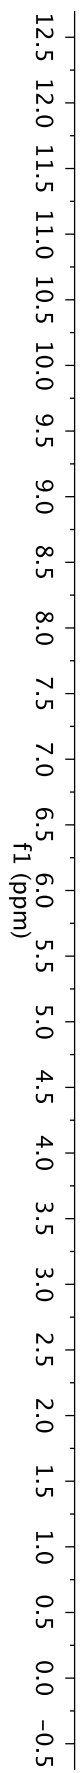

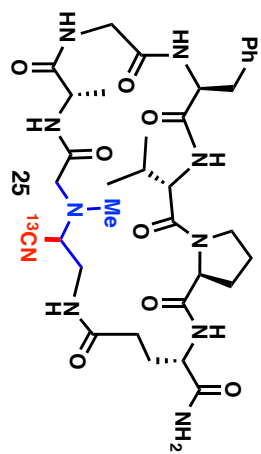

<sup>13</sup>C, DMSO-d<sub>6</sub>, 151 MHz

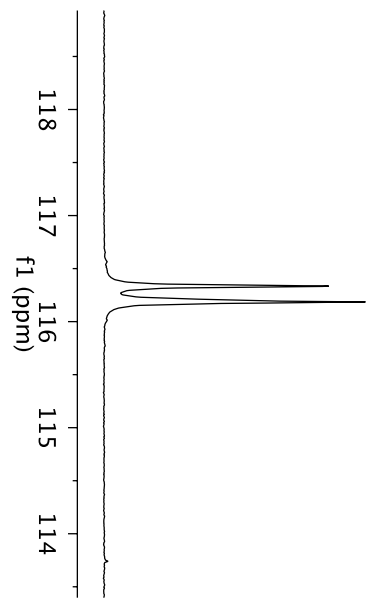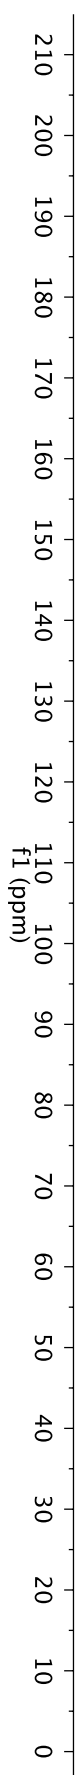

## Peptide 26

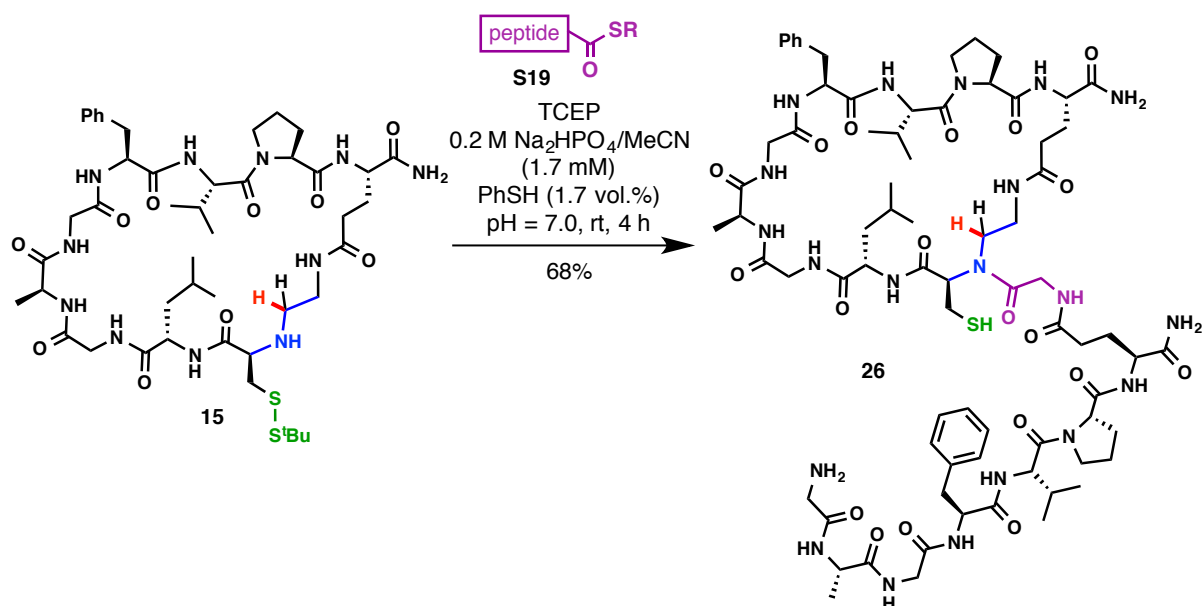

Peptide **26** was prepared by ligation of macrocycle **15** and peptide thioester **S19**. Ligation buffer was first prepared by dissolving the phosphine reductant *tris*(2-carboxyethyl)phosphine hydrochloride (TCEP) in aqueous 0.2 M Na<sub>2</sub>HPO<sub>4</sub> to provide a 50 mM solution of TCEP. The final pH of the buffer was adjusted to 7.0 using 1 M NaOH. The buffer was then sparged with argon for 5 min. Peptide thioester **S19** (0.9 mg, 1.1 μmol) was dissolved in ligation buffer (498 μL) and added to peptide macrocycle **15** (1.0 mg, 1.0 μmol) in a 1.5 mL eppendorf vial. MeCN (100 μL) was added to the reaction mixture to aid in solubilizing macrocycle **15**, thus providing a final reaction concentration of 1.7 mM with respect to peptide **15**. Thiophenol (10 μL, 1.7 vol.%) was added and the reaction mixture was stirred at rt and monitored by LC-MS. At t = 4 h, the reaction was purified by preparative reverse-phase HPLC (20% B for 5 min, then 20% to 50% B over 30 min) to afford ligation product **26** (1.1 mg, 68% yield) as a white solid following lyophilization.

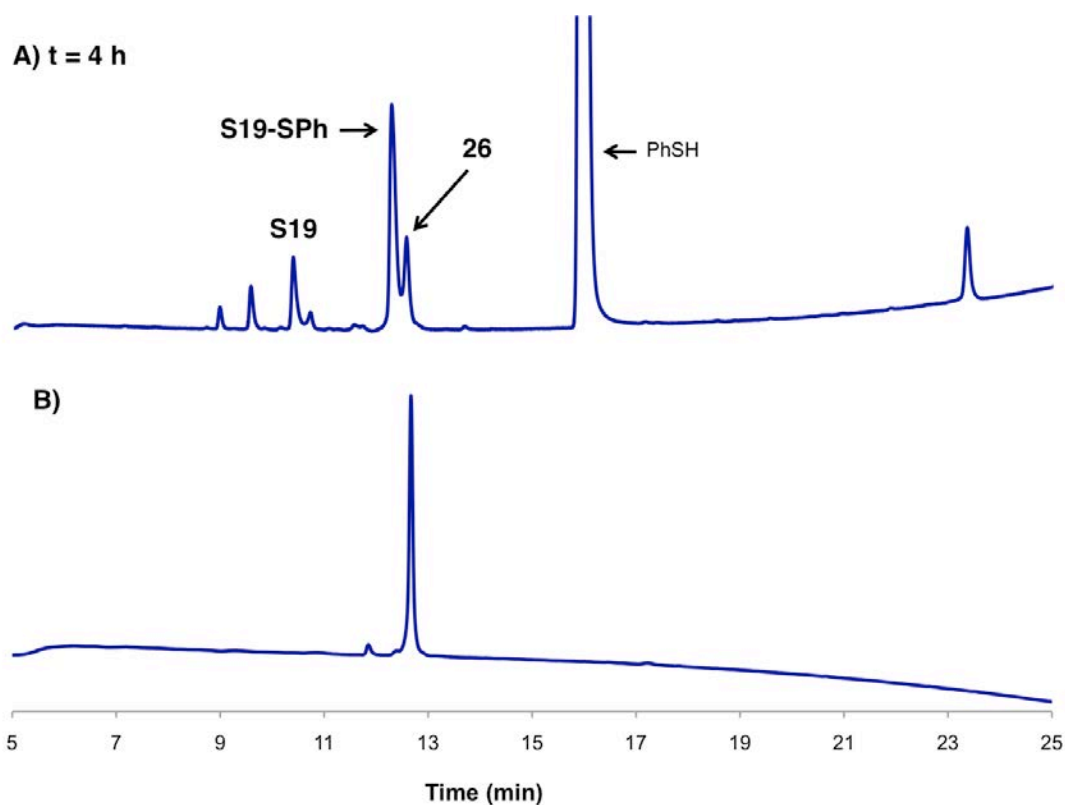

**A)** Crude analytical HPLC trace of the formation of **26** from macrocycle **15** and peptide thioester **S19** following native chemical ligation (5 to 100% B over 25 min,  $\lambda = 230$  nm). *Note: S19-SPh* represents the thiophenyl thioester variant of **S19** which forms upon transthioesterification of **S19** in the presence of excess PhSH. **B)** Purified peptide **26** ( $R_t = 12.7$  min, 5 to 100% B over 25 min,  $\lambda = 210$  nm).

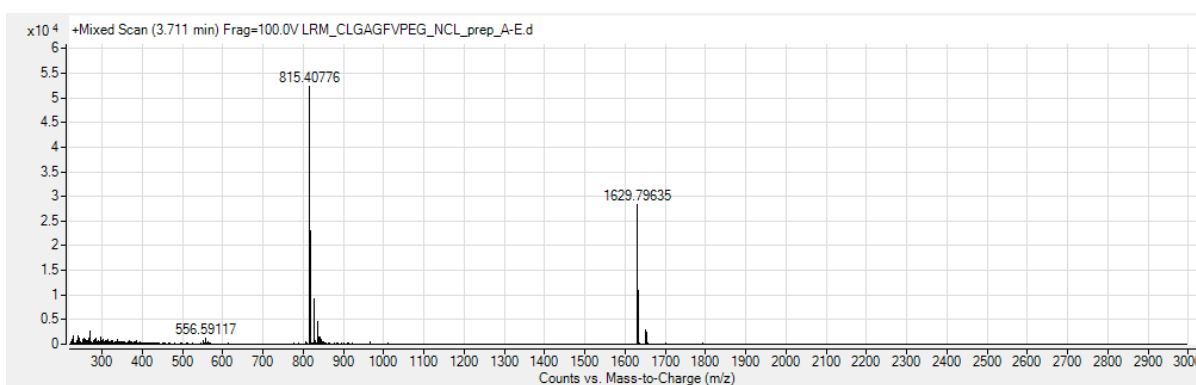

**LRMS (ESI-TOF):** calc'd for  $C_{75}H_{113}N_{20}O_{19}S$   $[M+H]^+$  1629.82; found 1629.80,  $[M+2H]^{2+}$  815.41; found 815.41





## Peptide 27

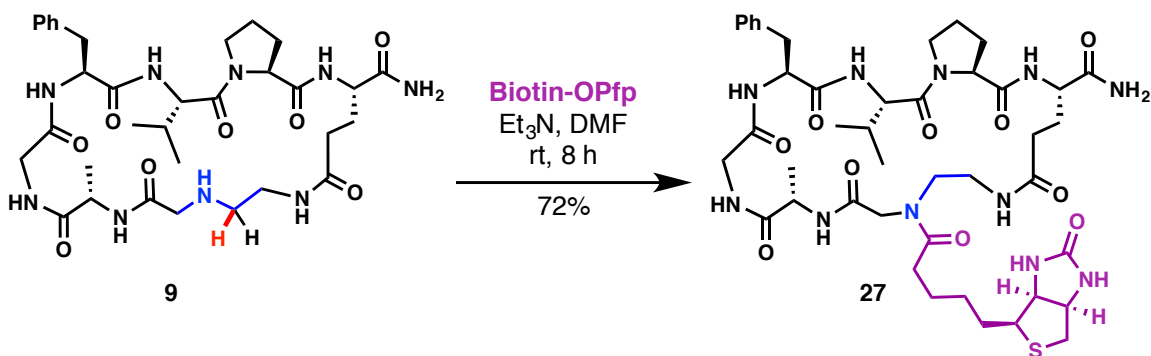

Biotin-labeled peptide **27** was prepared from macrocycle **9** (3.5 mg, 5.0  $\mu$ mol). To a solution of peptide **9** in dry DMF (1 mL) was added Et<sub>3</sub>N (1.4  $\mu$ L, 2.0 eq.) followed by biotin-OPfp (10.3 mg, 5.0 equiv.).<sup>9</sup> The reaction was stirred at rt and monitored by LC-MS. At  $t = 8$  h, the reaction was diluted with water (5 mL) and unreacted biotin-OPfp crashed out of solution. The crude mixture was partitioned between water and DCM. The aqueous layer was separated and purified by preparative reverse-phase HPLC (5% B for 5 min, 5% to 20% B over 5 min, then 20% to 50% B over 25 min) to afford peptide macrocycle **27** (3.3 mg, 72% yield) as a white solid following lyophilization.

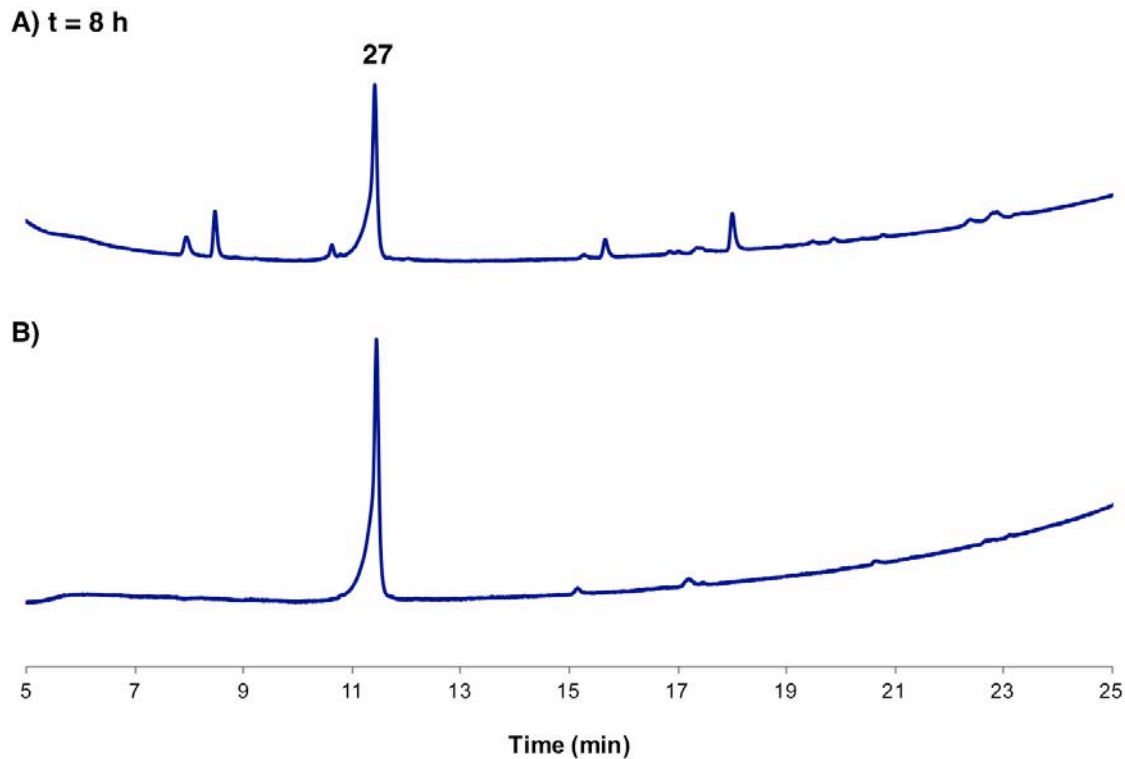

**A)** Crude analytical HPLC trace of the formation of **27** from macrocycle **9** following treatment with biotin-OPfp (5 to 100% B over 25 min,  $\lambda = 230$  nm). **B)** Purified peptide **27** ( $R_t = 11.4$  min, 5 to 100% B over 25 min,  $\lambda = 230$  nm).

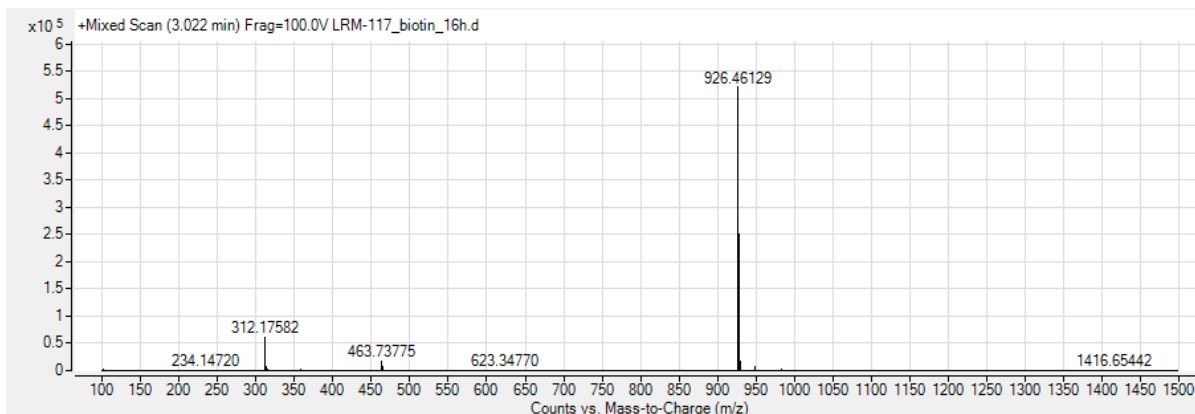

**LRMS (ESI-TOF):** calc'd for  $C_{43}H_{64}N_{11}O_{10}S$   $[M+H]^+$  926.46; found 926.46.

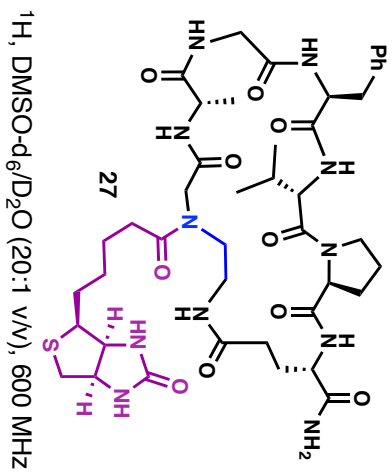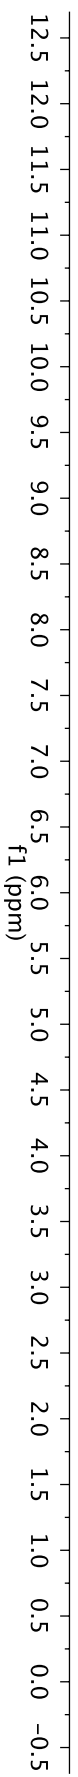

27  
COSY, DMSO-d<sub>6</sub>, 600 MHz

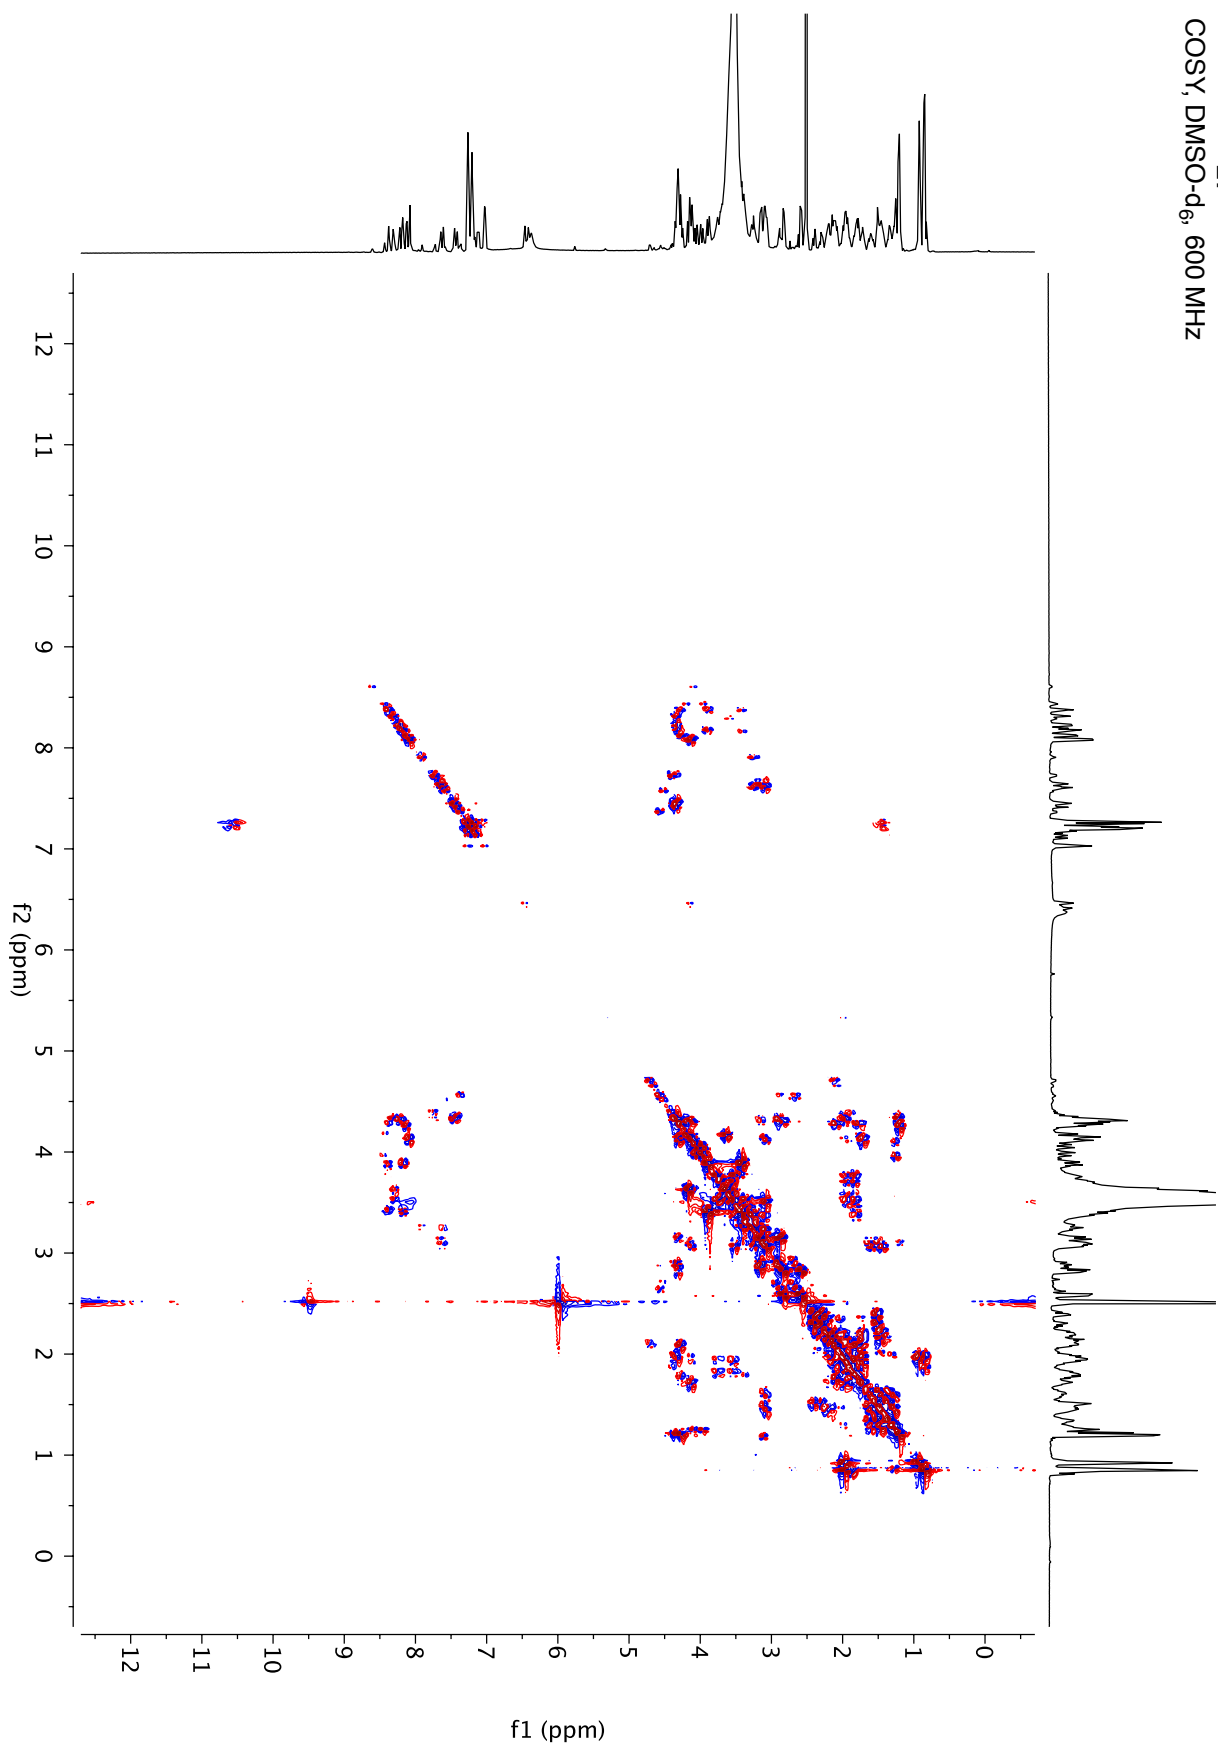

## Peptide 28

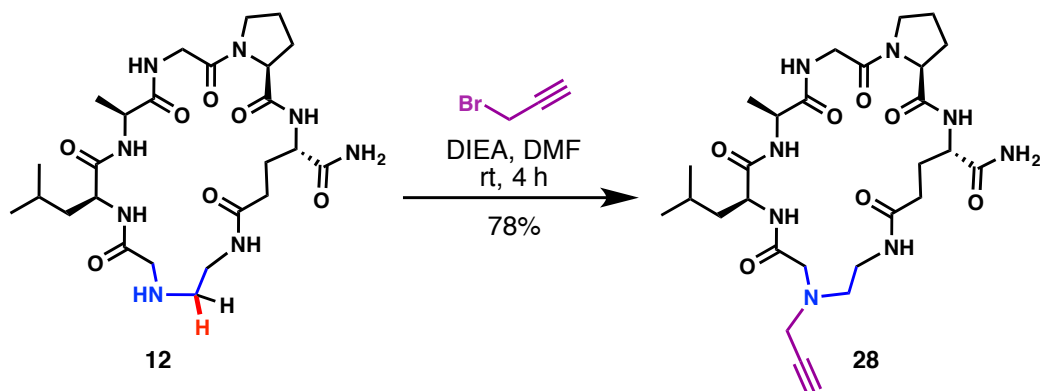

To a solution of purified peptide **12** (2.4 mg, 4.24  $\mu\text{mol}$ ) in DMF (1 mM) was added DIEA (2 equiv.), and the resulting solution was allowed to stir at room temperature for 5 min. Propargyl bromide (10 equiv.) was then added, and the reaction mixture was monitored by LC-MS analysis. At  $t = 4$  h, the reaction was purified by preparative reverse-phase HPLC (10% B for 10 min, 10% to 45% B over 30 min) to afford peptide macrocycle **28** (2.0 mg, 78% yield) as a white solid following lyophilization.

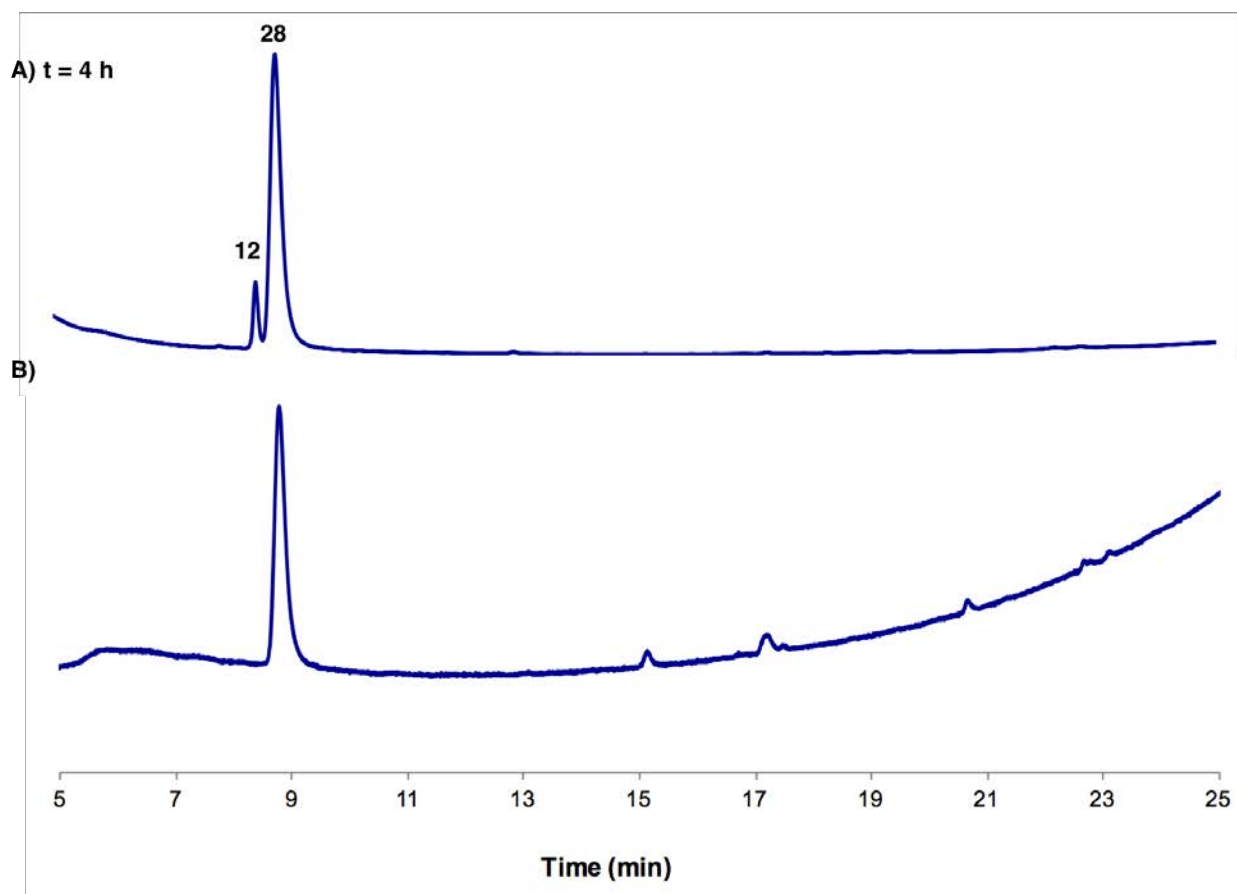

**A)** Crude analytical HPLC trace of the formation of **28** from peptide **12** following propargylation (5 to 100% B over 25 min,  $\lambda = 230$  nm). **B)** Purified peptide **28** ( $R_t = 8.78$  min, 5 to 100% B over 25 min,  $\lambda = 230$  nm).

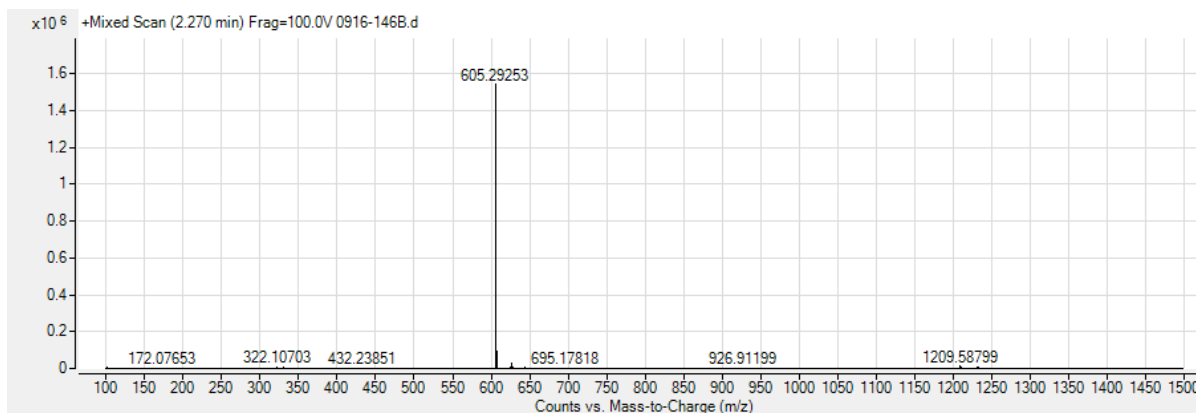

**LRMS (ESI-TOF):** calc'd for  $C_{28}H_{44}N_8O_7$   $[M+H]^+$  605.34; found 605.29.

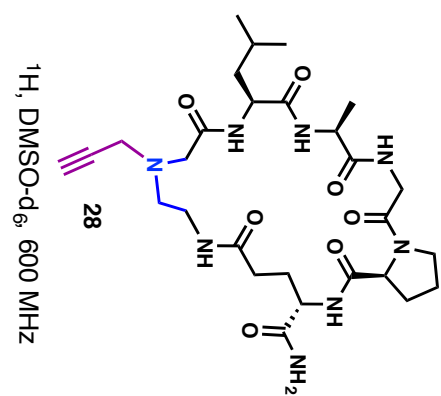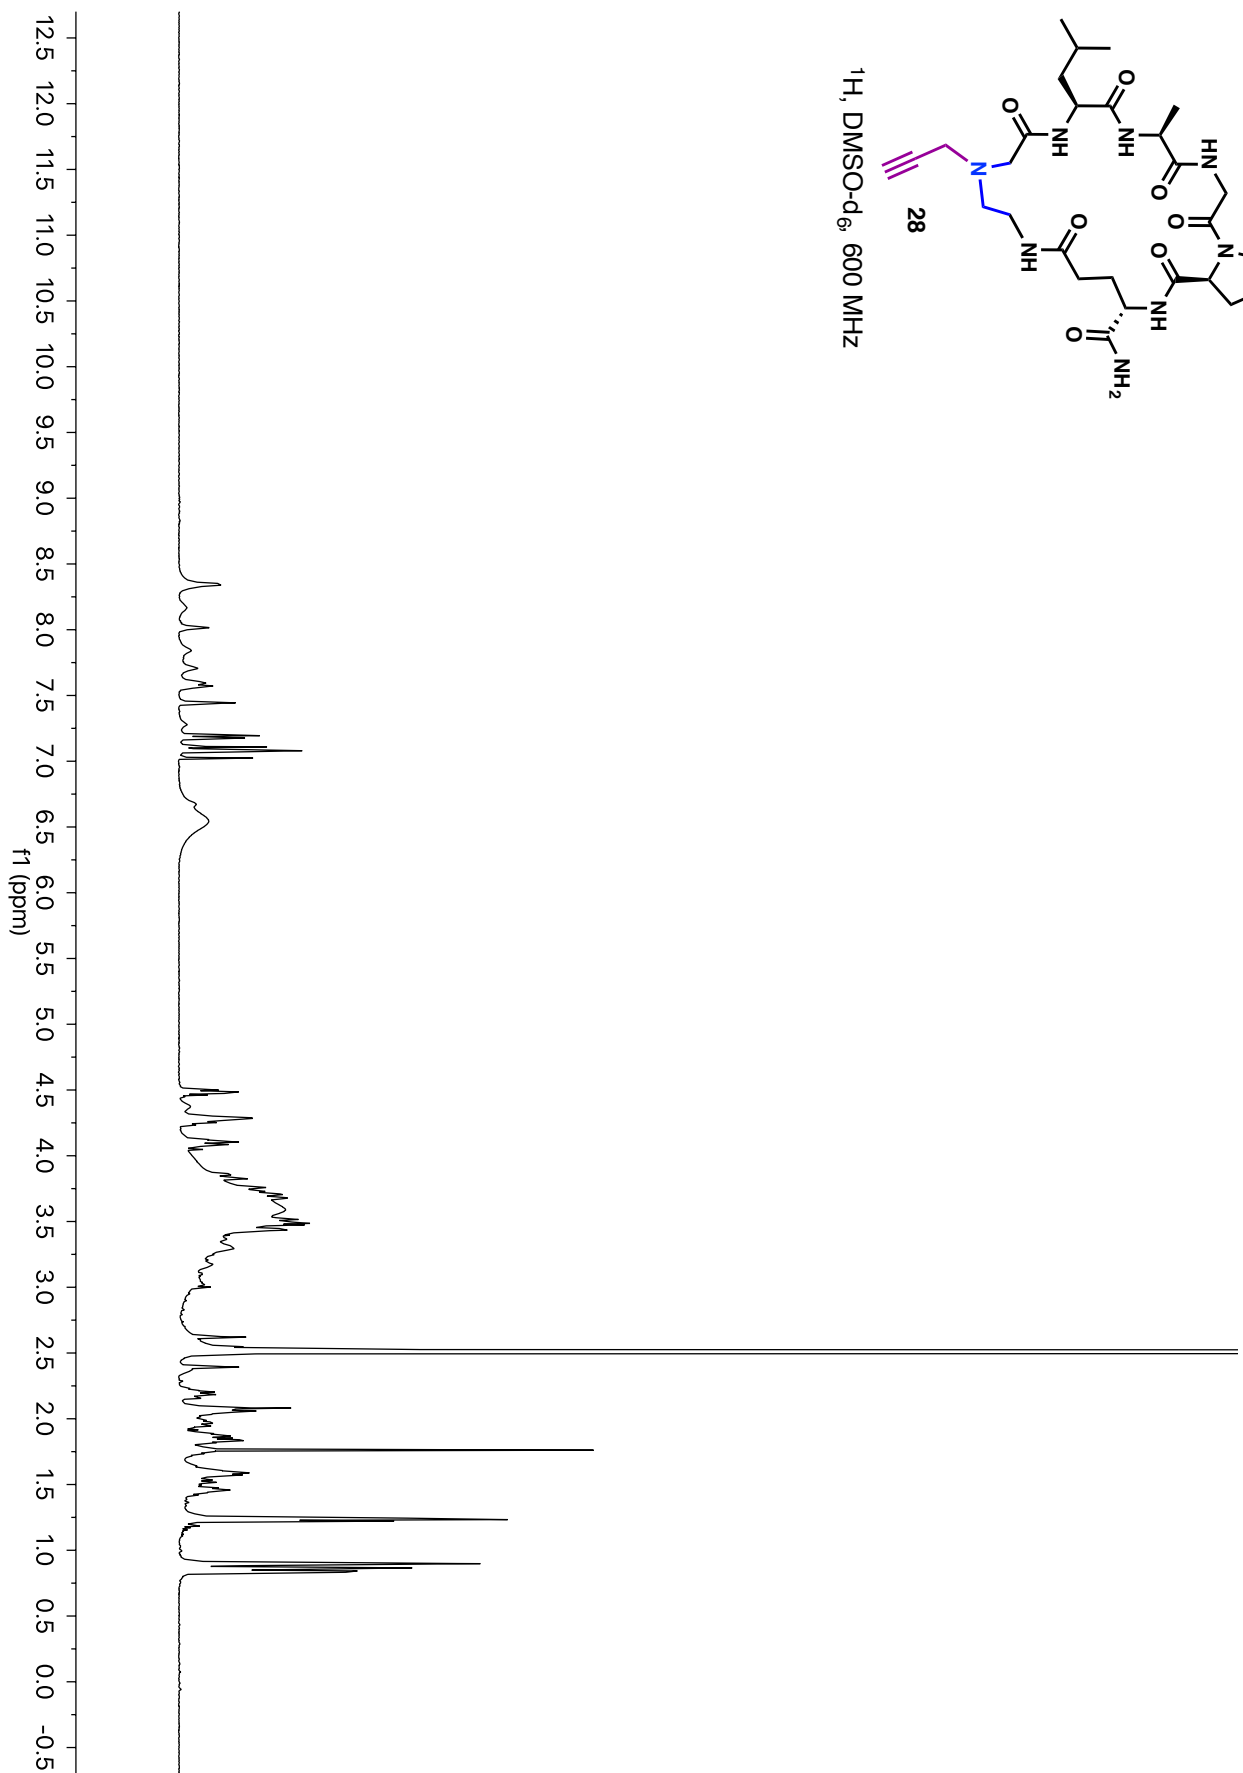



## Macrocyclization Data for Pictet-Spengler

### Peptide 29

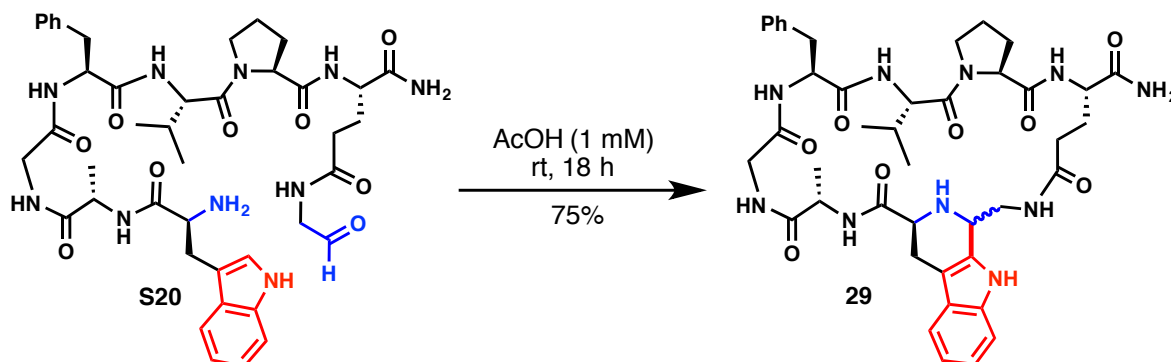

Peptide **29** was prepared from linear amino aldehyde **S20** using a Pictet-Spengler macrocyclization approach. Peptide **S20** (3.0 mg, 3.6  $\mu\text{mol}$ ) was dissolved in AcOH (1 mM) and stirred at rt. At  $t = 18$  h, the reaction was purified by preparative reverse-phase HPLC (5% B for 5 min, 5% B to 25% B over 5 min, then 25% to 65% B over 30 min) to afford peptide macrocycle **29** (2.2 mg, 75% combined yield) as a partially separable mixture of diastereomers and as white solids following lyophilization.

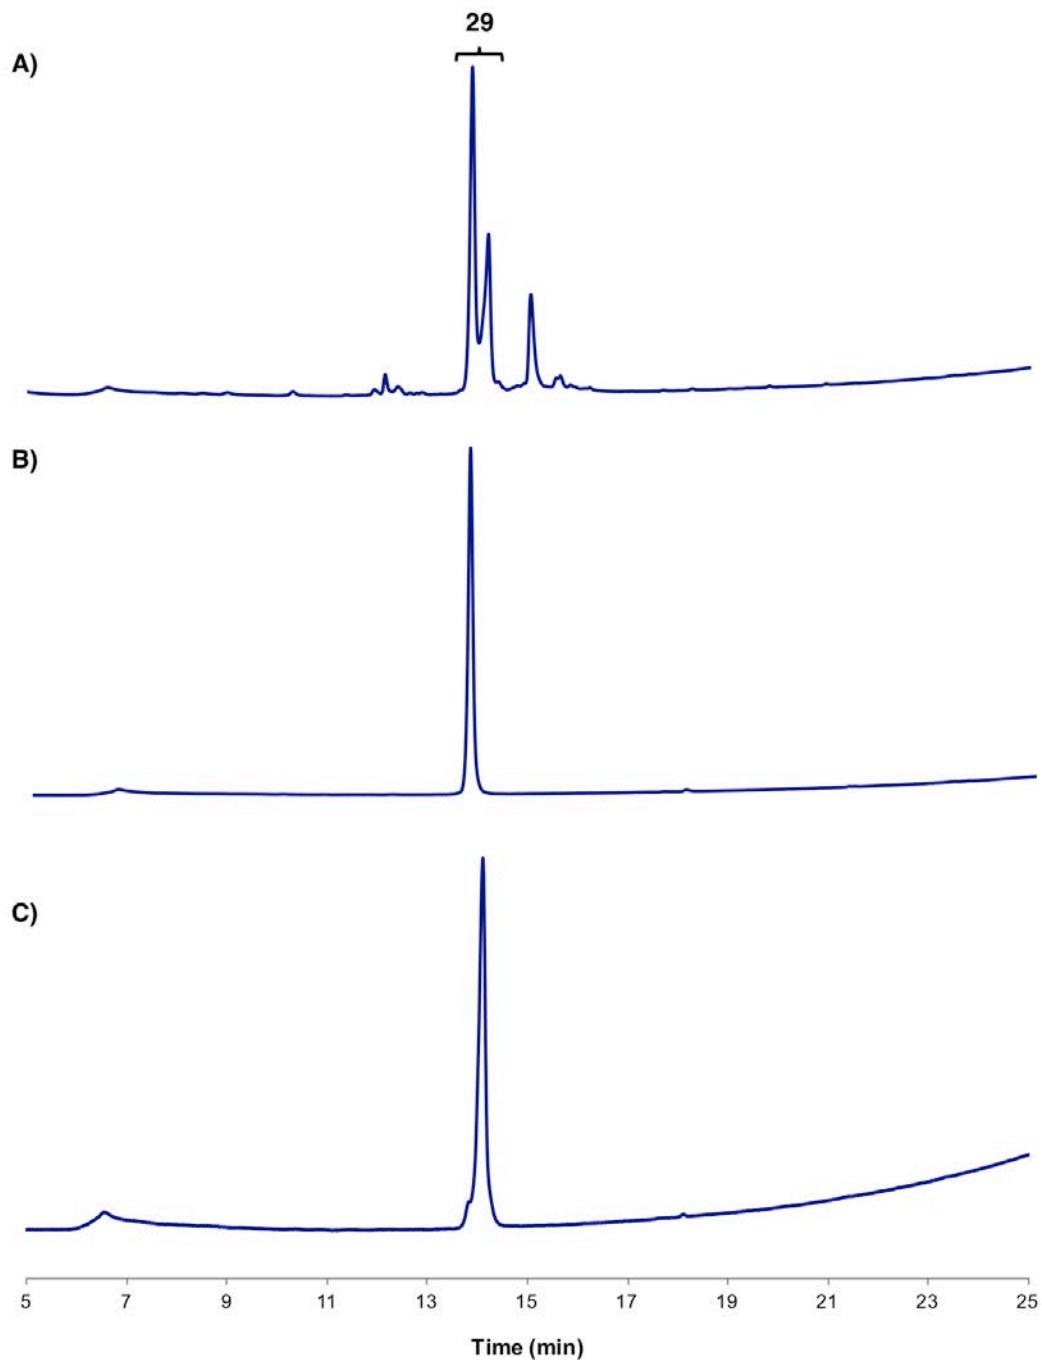

**A)** Crude Pictet-Spengler reaction to form diastereomeric macrocycles **29** (0 to 100% B over 25 min,  $\lambda = 230$  nm). **B)** Purified **29**, major diastereomer ( $R_t = 13.7$  min, 0 to 100% B over 25 min,  $\lambda = 230$  nm). **C)** Purified **29**, minor diastereomer ( $R_t = 14.1$  min, 0 to 100% B over 25 min,  $\lambda = 230$  nm). Note: some mixed fractions were also obtained upon HPLC purification.

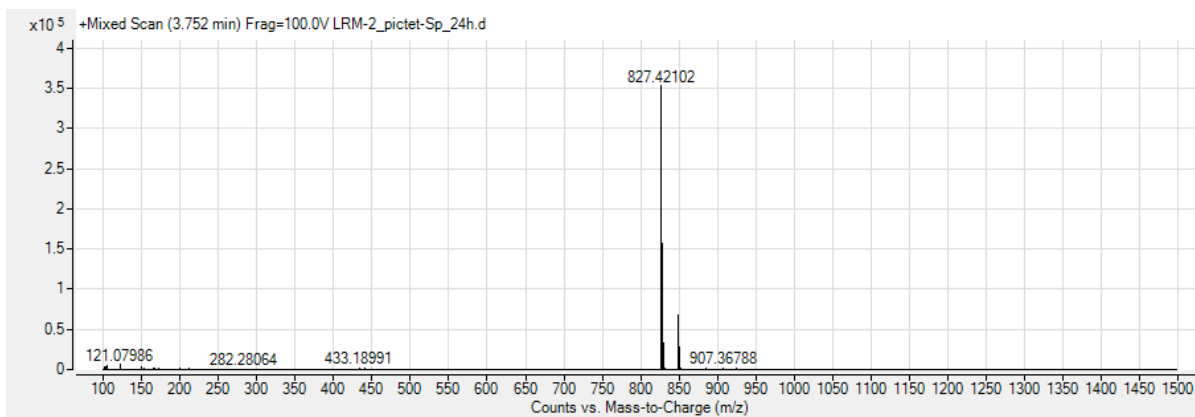

**LRMS (ESI-TOF):** calc'd for  $C_{42}H_{55}N_{10}O_8$   $[M+H]^+$  827.42; found 827.42.

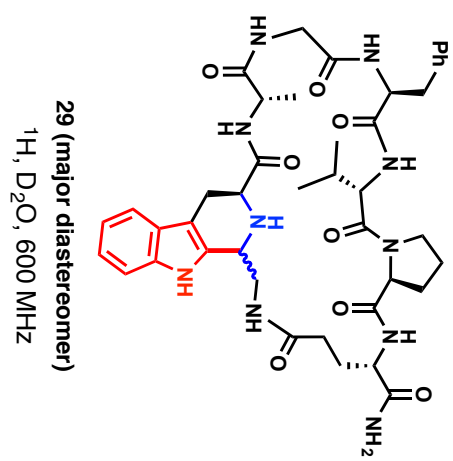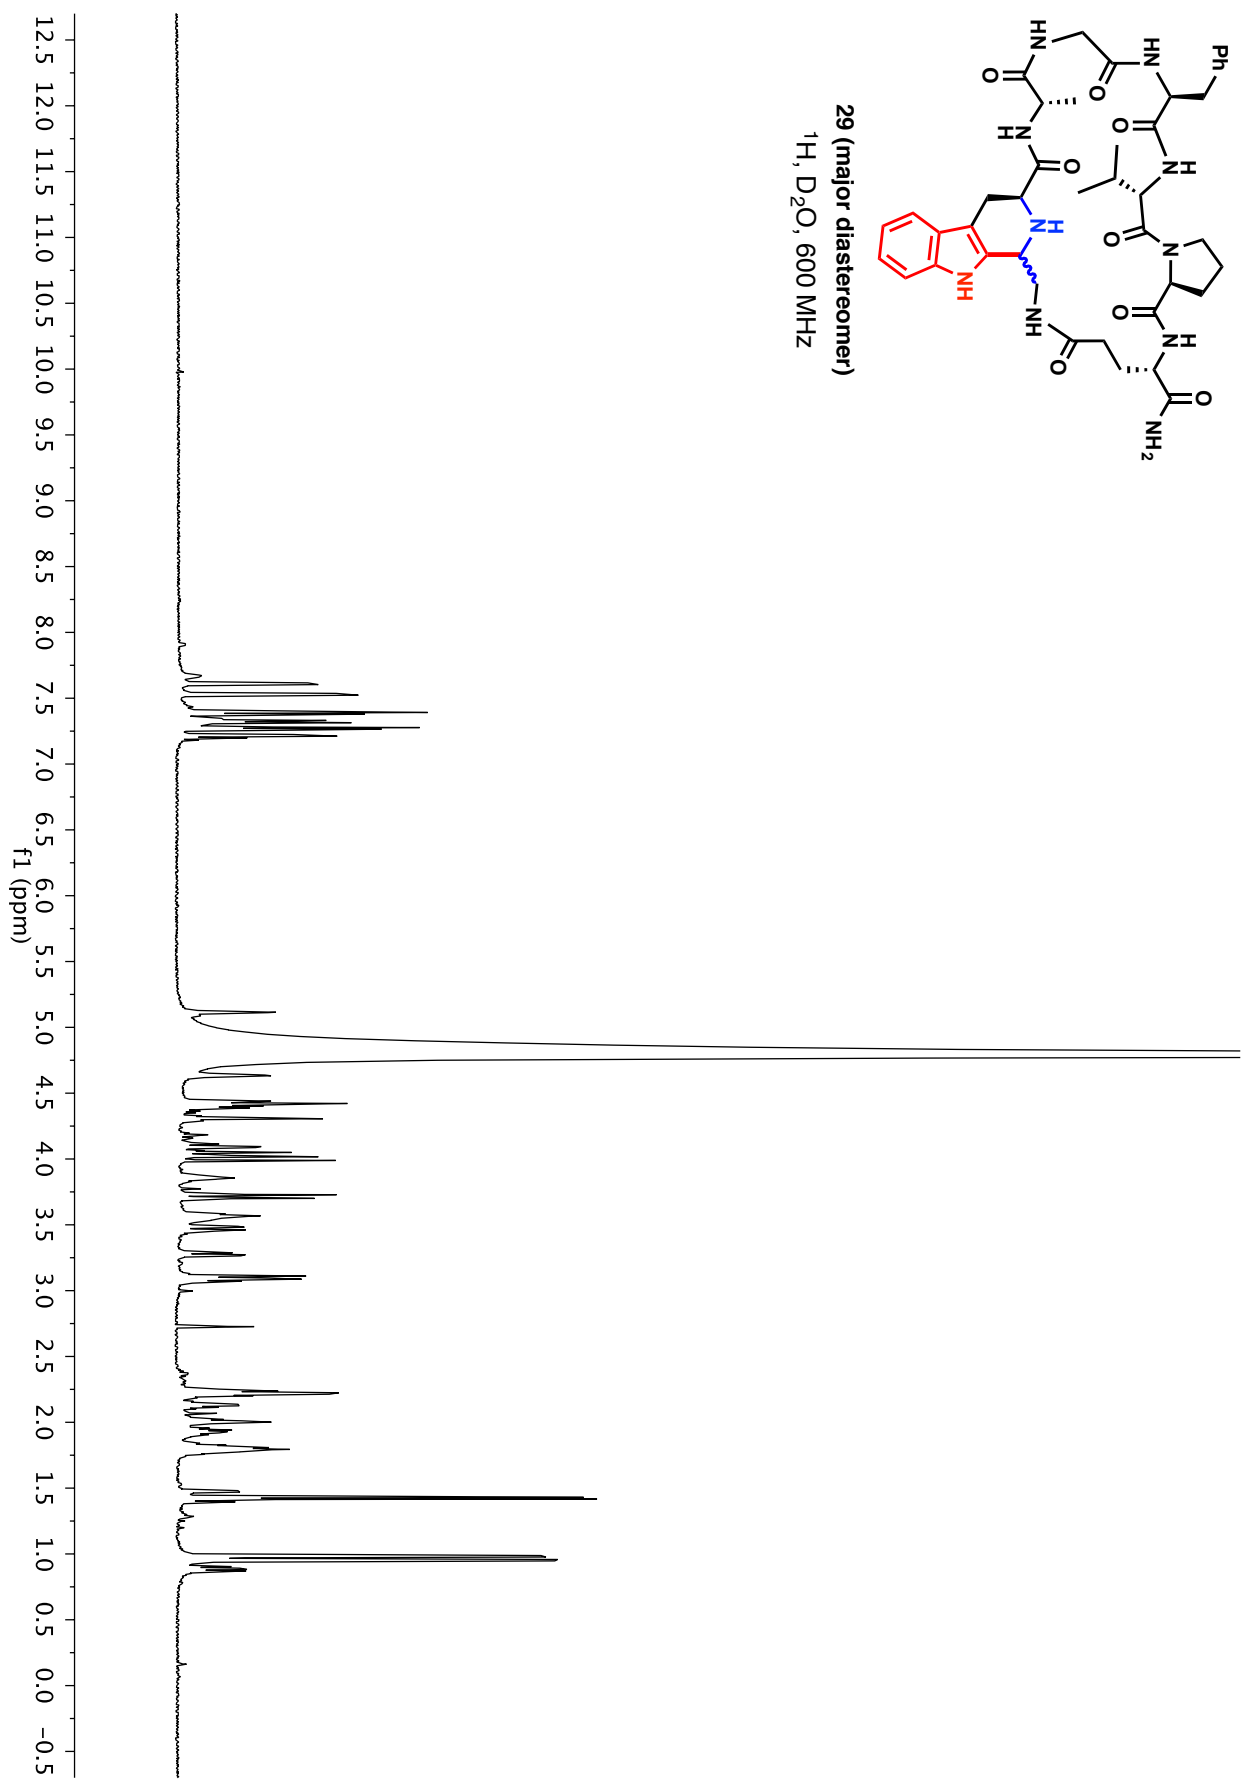

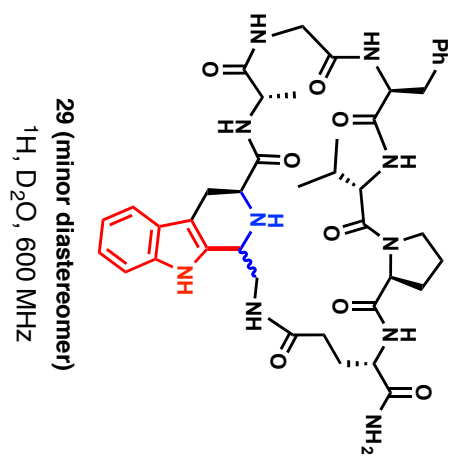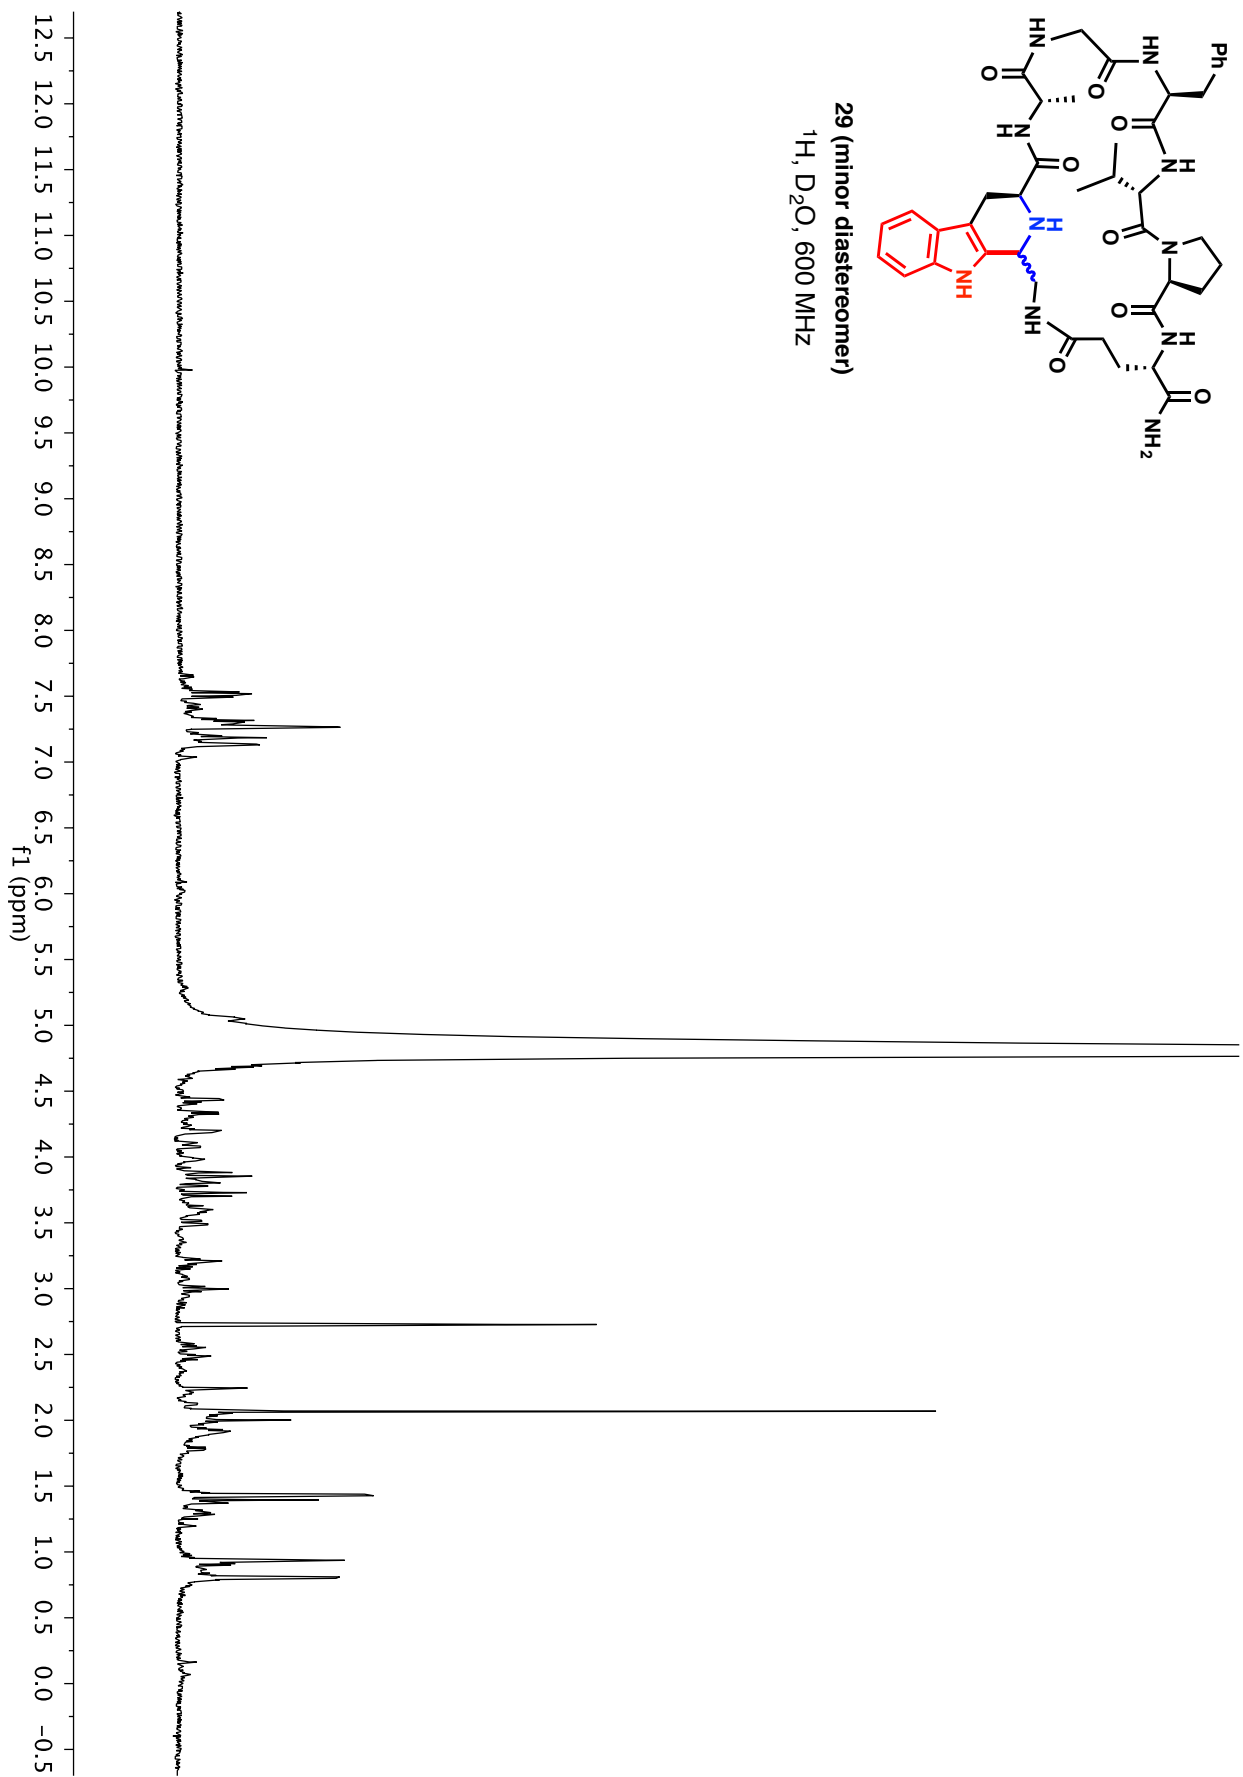

29  
COSY, DMSO-d<sub>6</sub>, 600 MHz

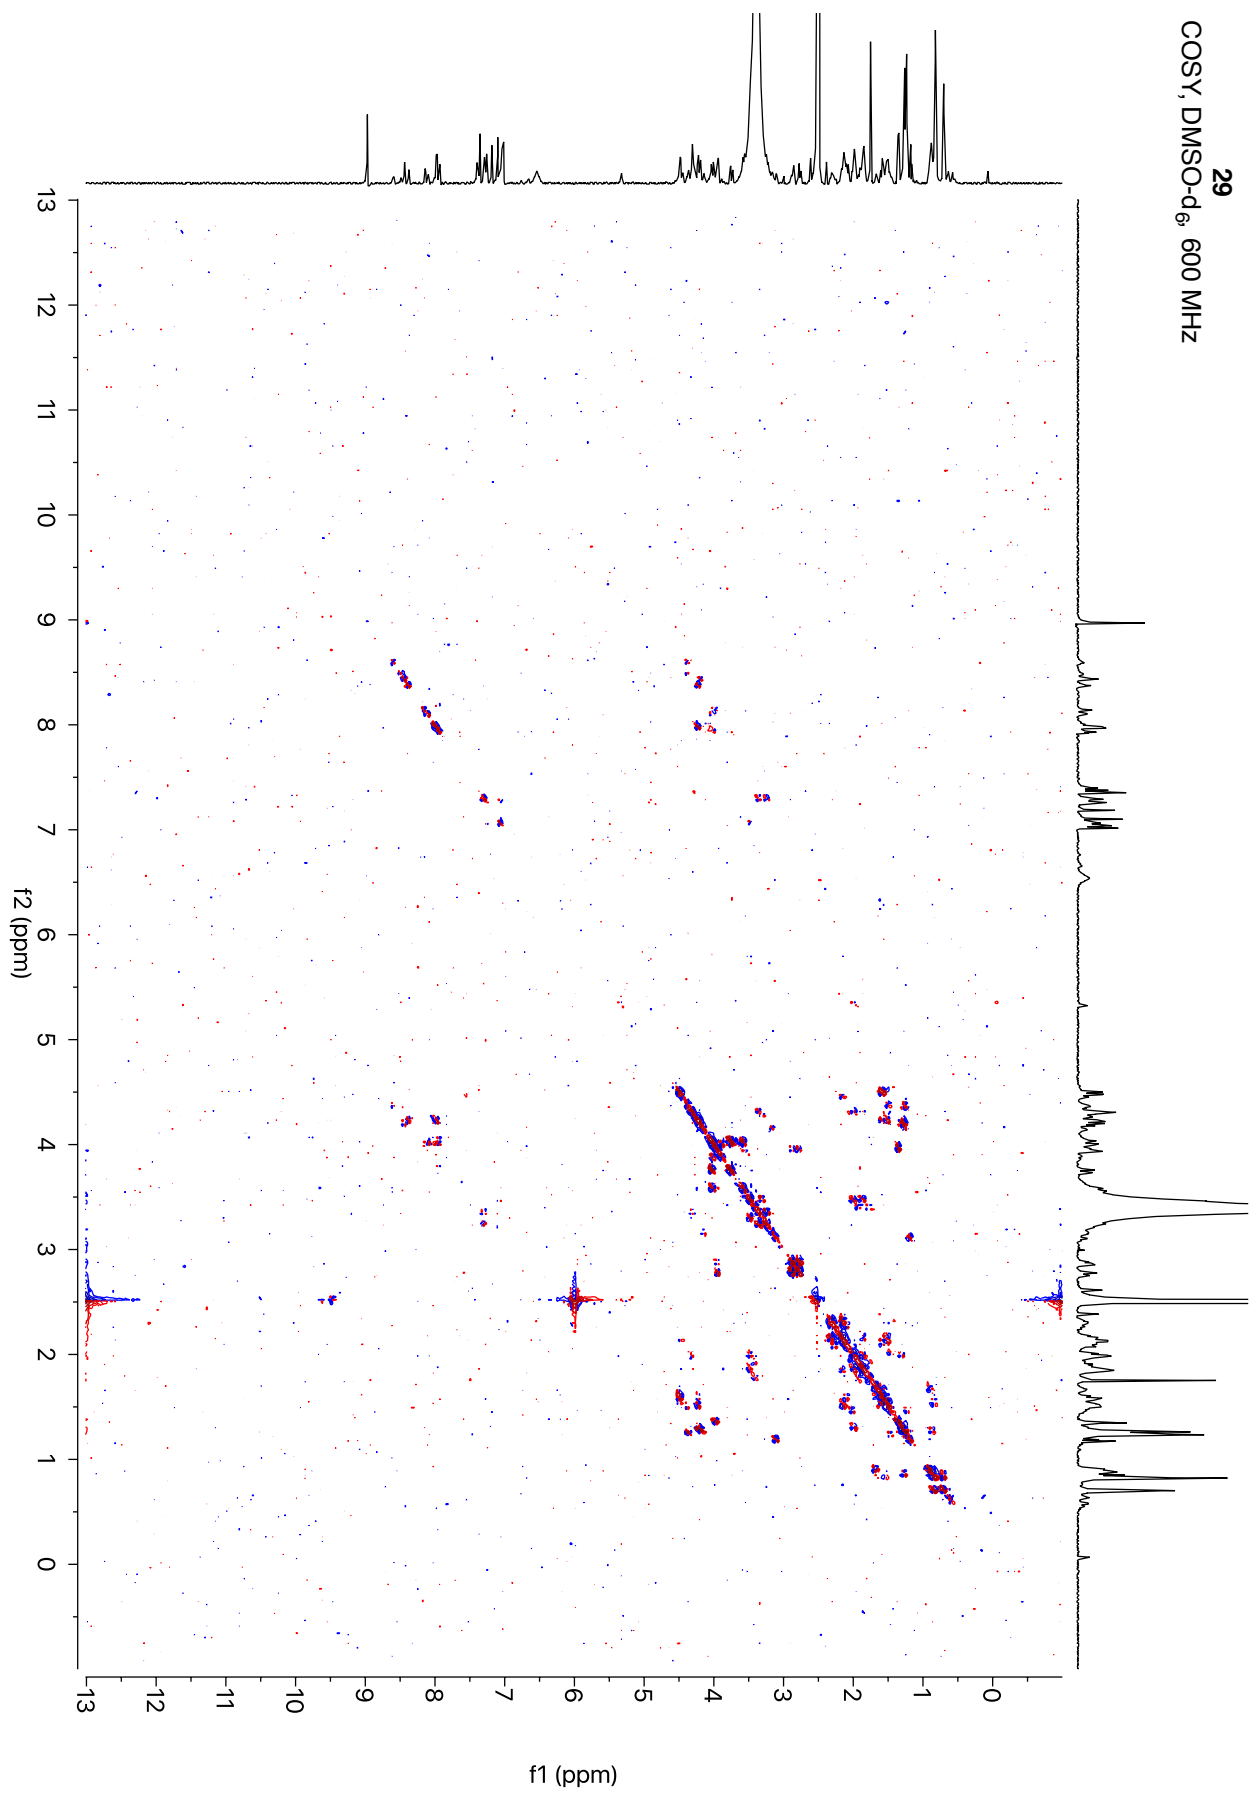

f1 (ppm)  
S218

### Peptide 30

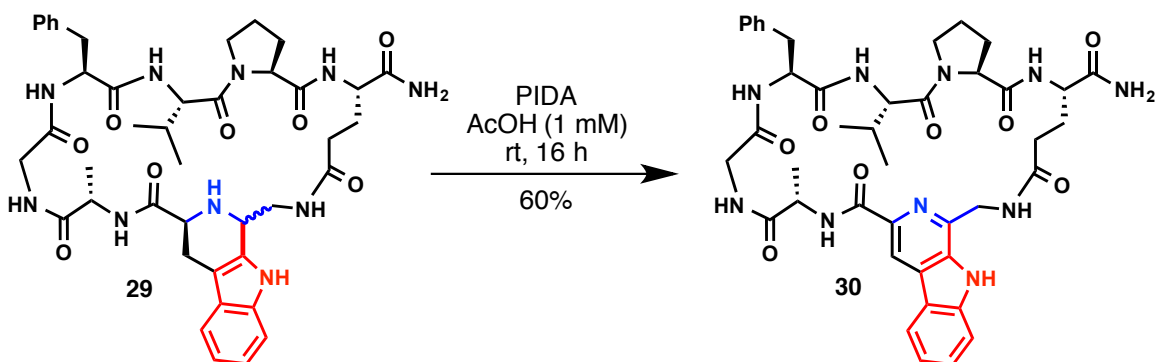

Peptide **30** was prepared by oxidation of diastereomeric tetrahydro- $\beta$ -carboline **29**. Peptide **29** (2.0 mg, 2.4  $\mu$ mol) was dissolved in AcOH (2.4 mL, 1 mM) and treated with phenyliodine diacetate (PIDA) (1.6 mg, 2 eq.). The reaction was stirred at rt for 16 h, at which point LC-MS analysis indicated complete consumption of the starting peptide. The reaction was concentrated to  $\sim$ 1 mL under a stream of nitrogen, diluted in a mixture of water and MeCN, and purified by preparative reverse-phase HPLC (25% B for 5 min, then 25% to 75% B over 25 min) to afford peptide macrocycle **30** (1.2 mg, 60% yield) as a white solid following lyophilization.

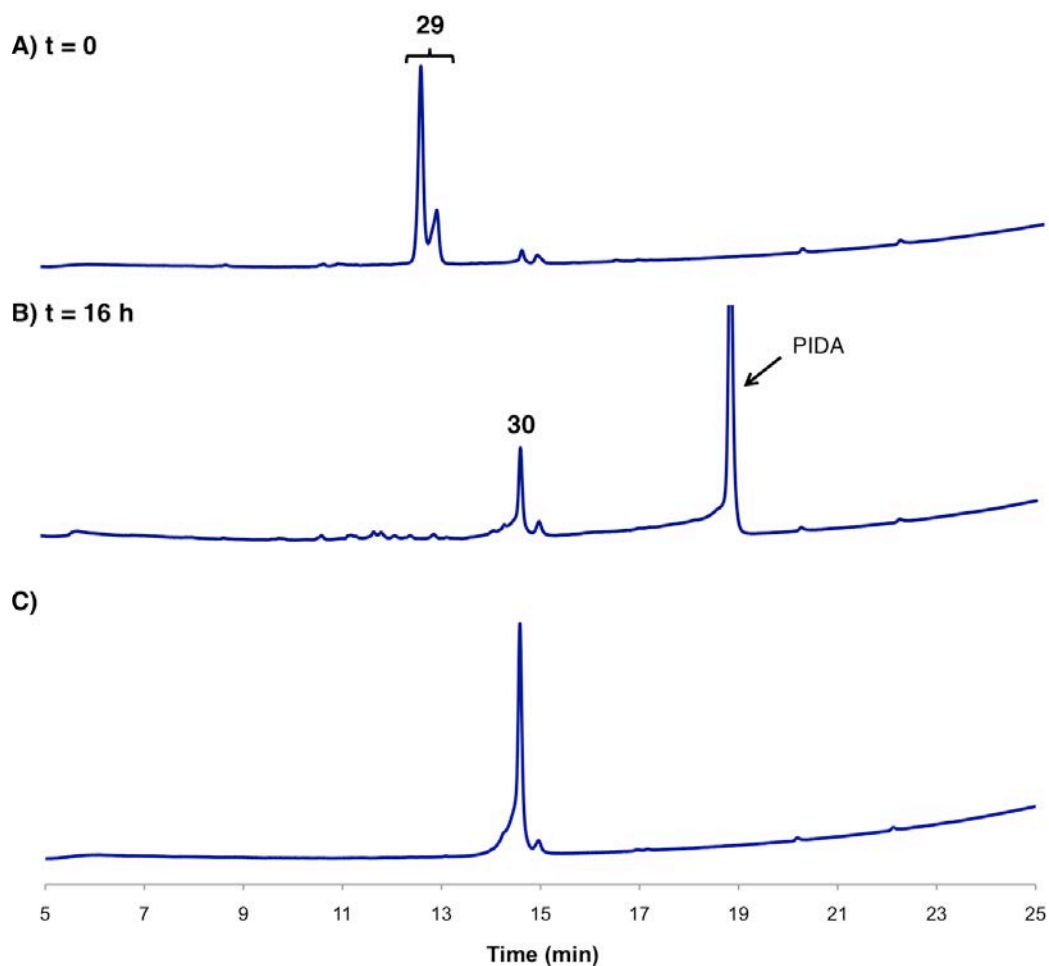

**A)** Reaction at  $t = 0$  depicting diastereomeric tetrahydro- $\beta$ -carboline **29** (5 to 100% B over 25 min,  $\lambda = 230$  nm). **B)** Crude oxidation to afford  $\beta$ -carboline **30** (5 to 100% B over 25 min,  $\lambda = 230$  nm). **C)** Purified  $\beta$ -carboline oxidation product **30** ( $R_t = 14.6$  min, 5 to 100% B over 25 min,  $\lambda = 230$  nm).

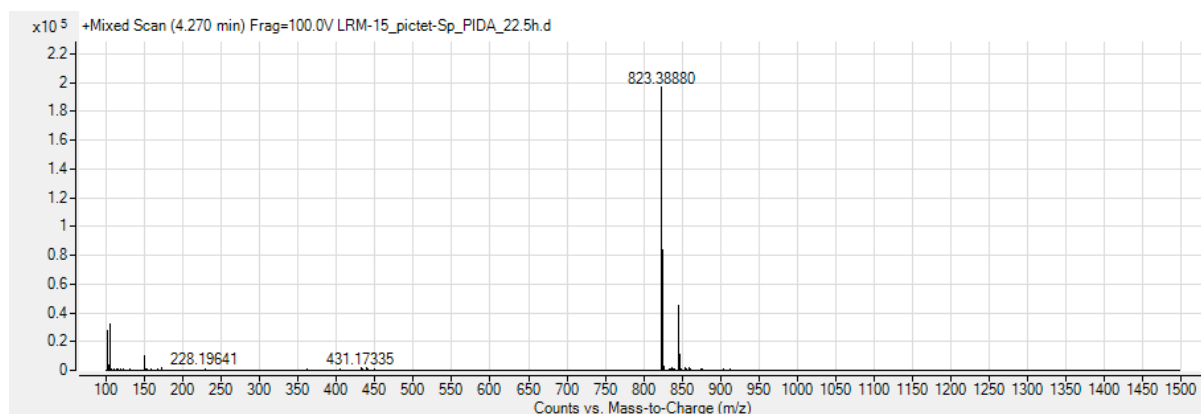

**LRMS (ESI-TOF):** calc'd for  $C_{42}H_{51}N_{10}O_8$   $[M+H]^+$  823.39; found 823.39.



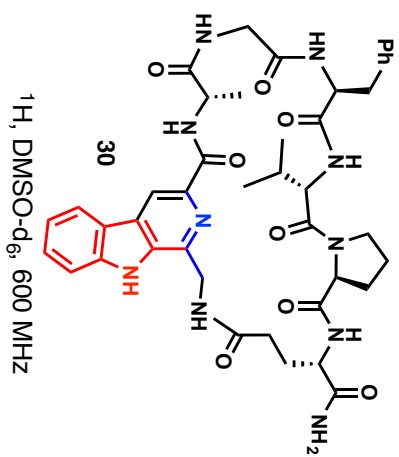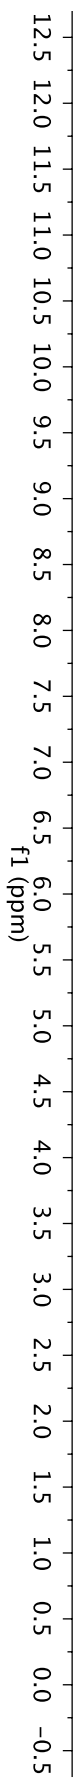

30  
COSY, DMSO-d<sub>6</sub>, 600 MHz

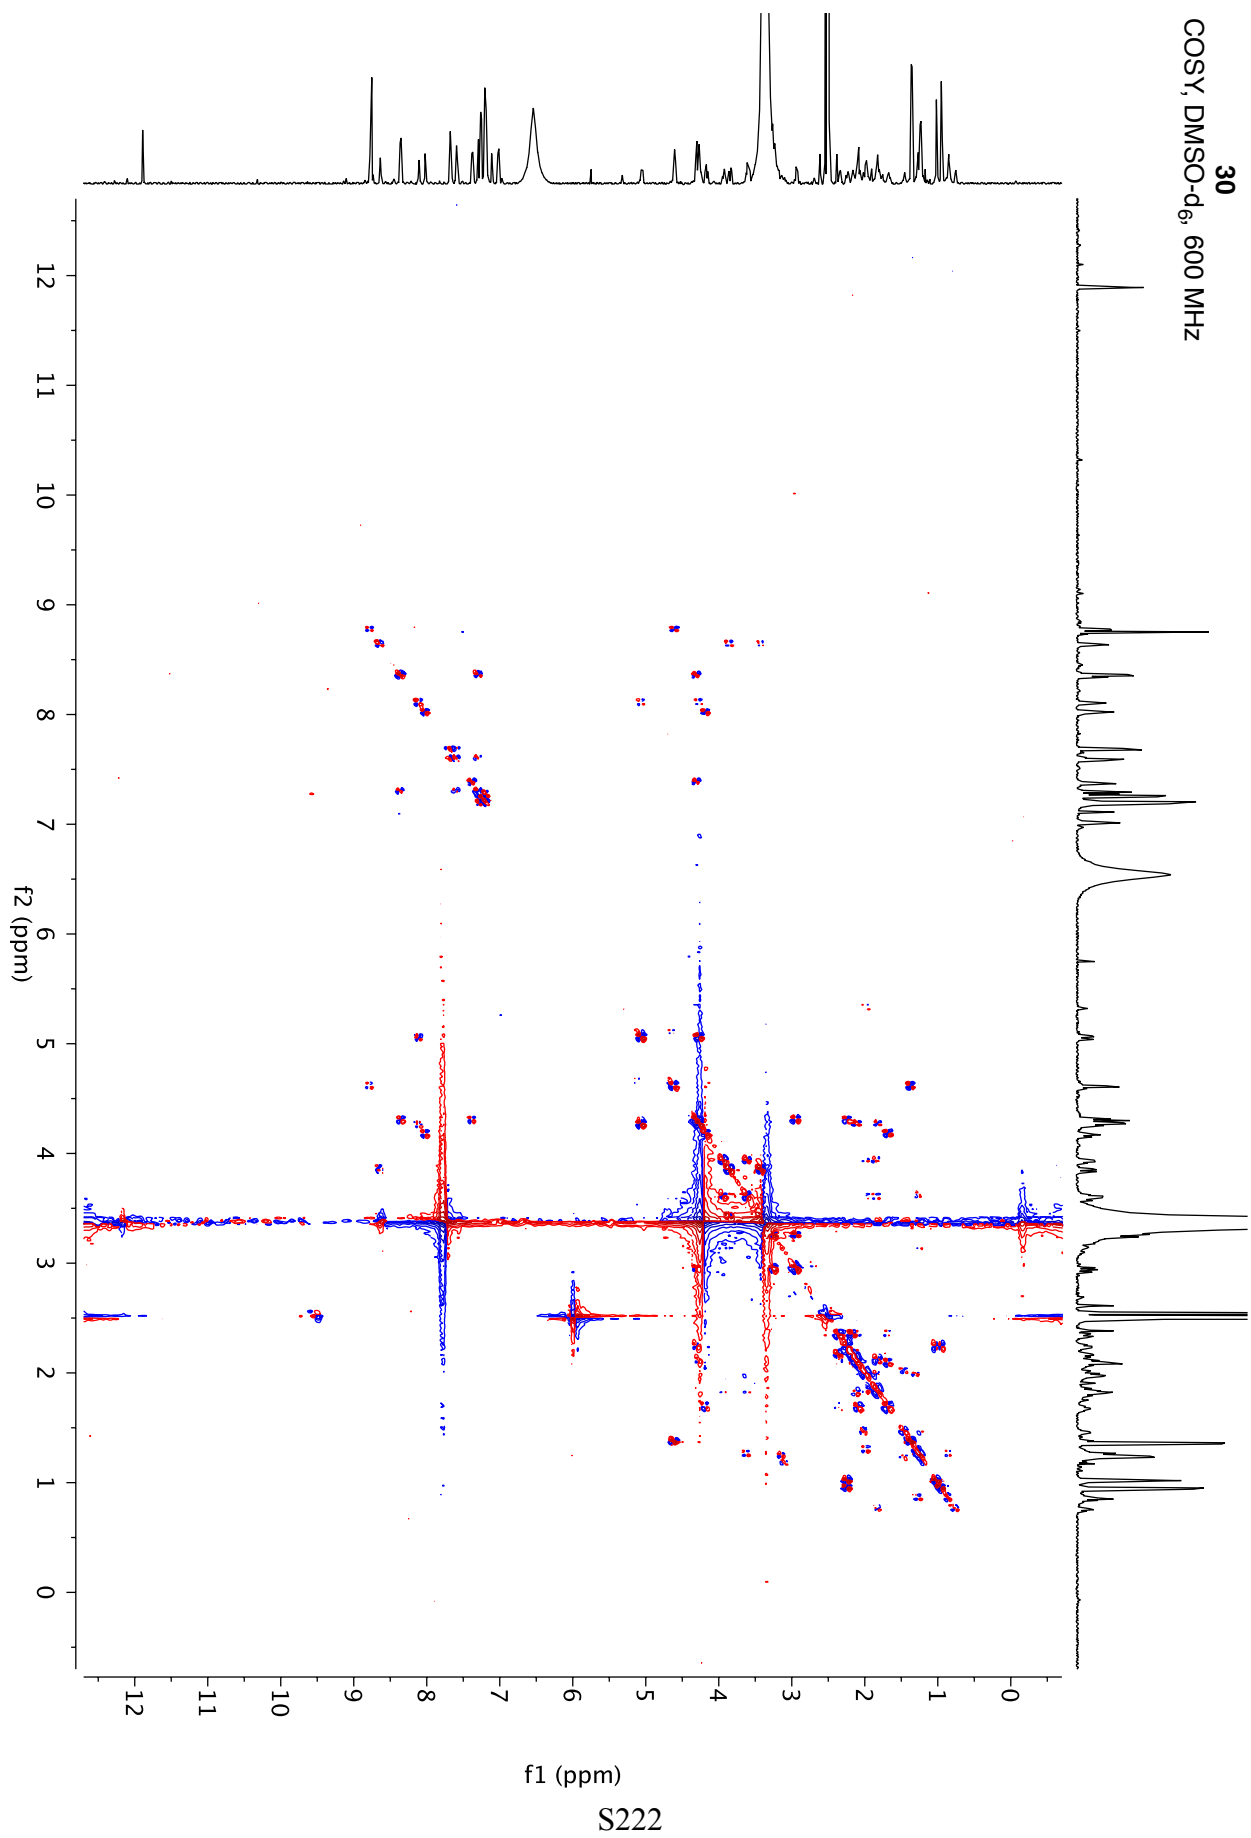

f1 (ppm)  
S222

### Peptide 30 (one-pot protocol)

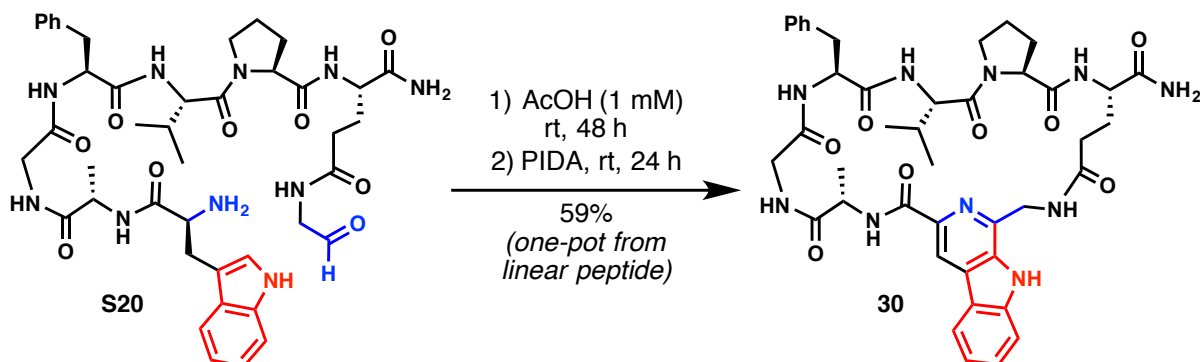

Peptide **30** was prepared in a one-pot fashion from linear amino aldehyde **S20** (2.0 mg, 2.4  $\mu$ mol). Peptide **S20** was dissolved in AcOH (2.4 mL, 1 mM) and stirred at rt. At  $t = 48$  h, phenyliodine diacetate (PIDA) (1.6 mg, 2 eq.) was added and the reaction was monitored for an additional 24 h before LC-MS indicated complete consumption of the tetrahydro- $\beta$ -carboline. The crude mixture was concentrated to  $\sim 1$  mL under a stream of nitrogen, diluted in a mixture of water and MeCN, and purified by preparative reverse-phase HPLC (25% B for 5 min, then 25% to 75% B over 25 min) to afford peptide macrocycle **30** (1.1 mg, 59% yield) as a white solid following lyophilization.

*Note: The one-pot oxidation protocol was performed on starting peptide aldehyde **S20** that had been stored as a lyophilized solid at 4  $^{\circ}$ C for a period of 4 months. Over this time period, substantial oligomerization of the peptide aldehyde was observed (see HPLC traces below). Nonetheless, upon addition of AcOH (final peptide concentration of 1 mM) Pictet-Spengler macrocyclization led to clean formation of the monomeric macrocycle **30**. The inherent reversibility of the amino aldehyde oligomerization allows the reaction to proceed efficiently despite the presence of a complex mixture of starting peptide.*

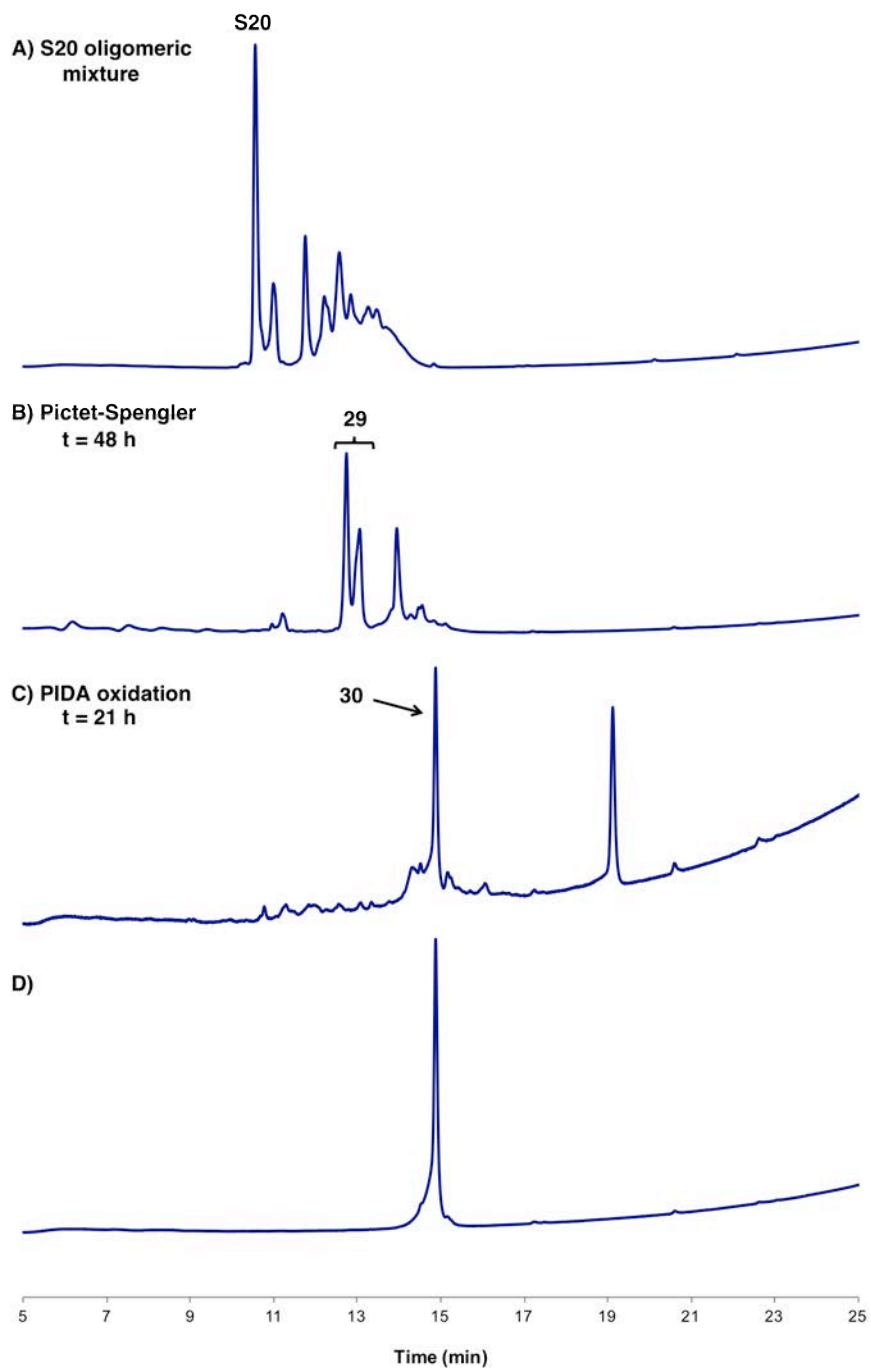

**A)** Peptide amino aldehyde **S20** after storage at 4 °C for 4 months (oligomeric mixture) (5 to 100% B over 25 min,  $\lambda = 230$  nm). **B)** Crude Pictet-Spengler reaction to form diastereomeric macrocycles **29**. **C)** Crude oxidation following one-pot addition of PIDA. **D)** Purified  $\beta$ -carboline oxidation product **30** ( $R_t = 14.9$  min, 5 to 100% B over 25 min,  $\lambda = 230$  nm).

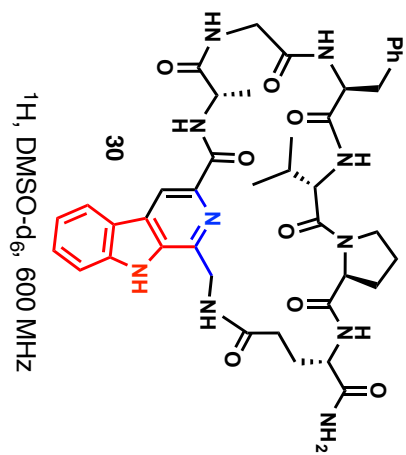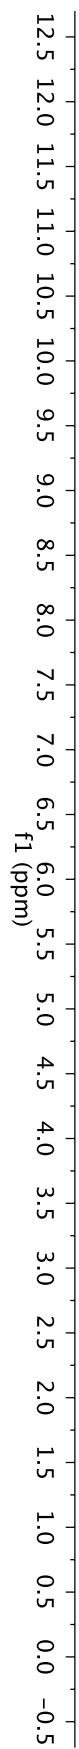

## Peptide 31

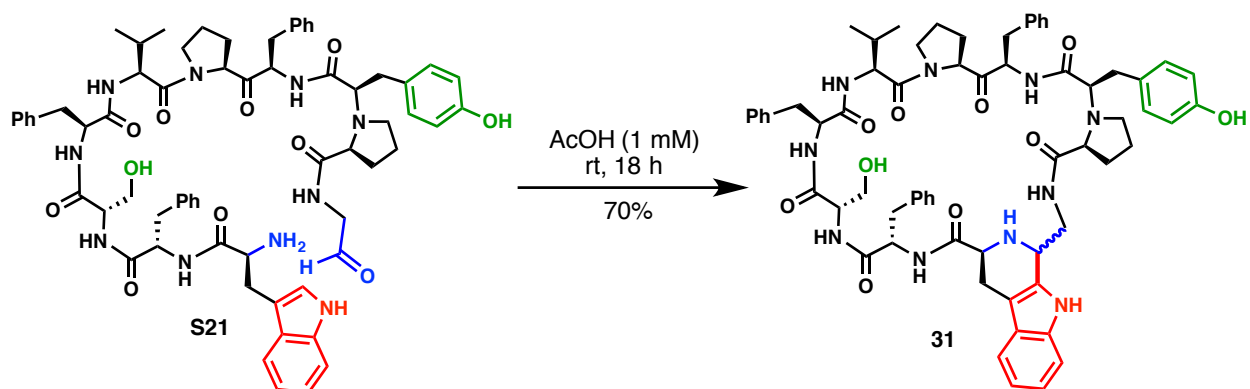

Peptide **31** was prepared from linear amino aldehyde **S21** using a Pictet-Spengler macrocyclization approach. Peptide **S21** (5.1 mg, 4.1  $\mu\text{mol}$ ) was dissolved in AcOH (1 mM) and stirred at rt. At  $t = 18$  h, the reaction was purified by preparative reverse-phase HPLC (40% B for 10 min, 40% to 80% B over 30 min) to afford peptide macrocycle **31** (3.5 mg, 70% combined yield) as a partially separable mixture of diastereomers and as white solids following lyophilization.

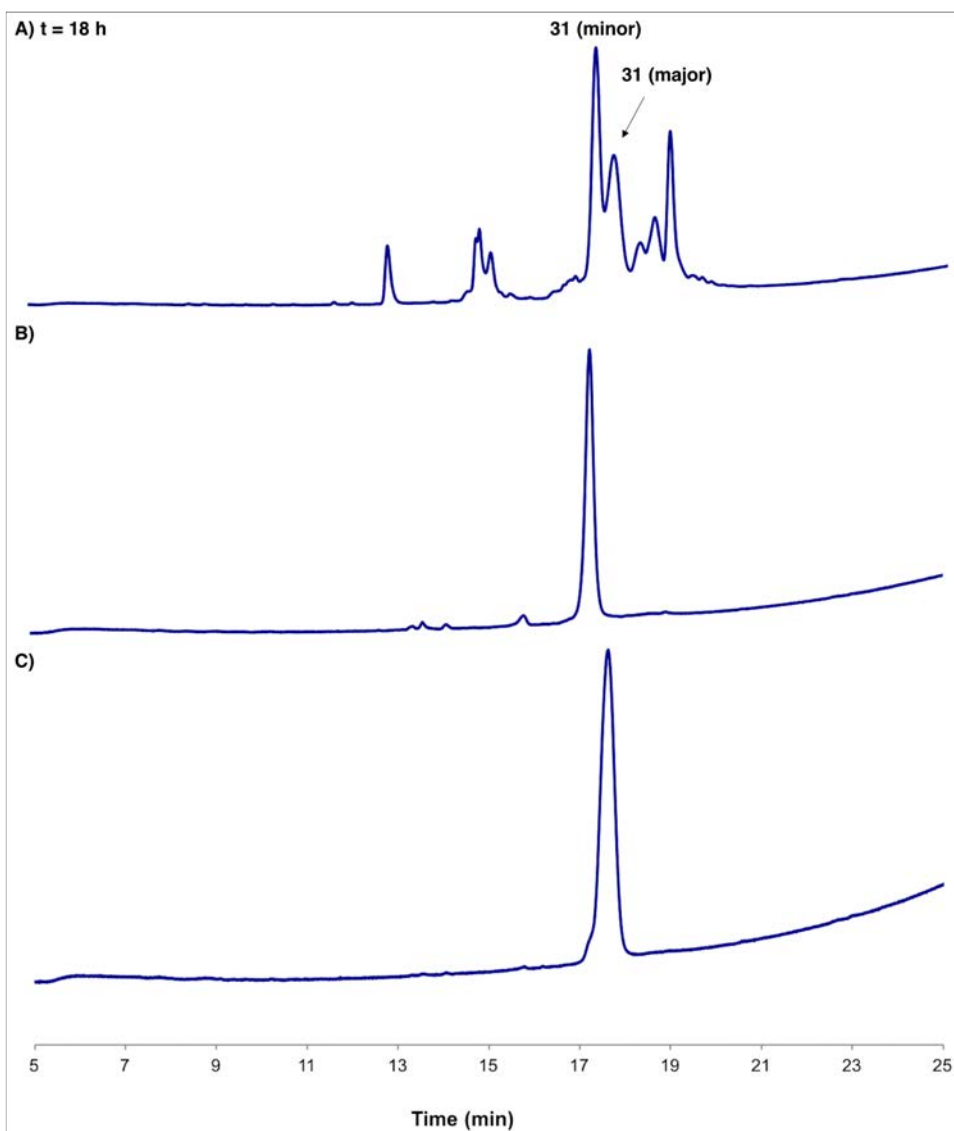

**A)** Crude Pictet-Spengler reaction to form diastereomeric macrocycles **31** (5 to 100% B over 25 min,  $\lambda = 210$  nm). **B)** Purified **31**, minor diastereomer (Rt = 17.3 min, 5 to 100% B over 25 min,  $\lambda = 210$  nm). **C)** Purified **31**, major diastereomer (Rt = 17.6 min, 5 to 100% B over 25 min,  $\lambda = 210$  nm). Note: some mixed fractions were also obtained upon HPLC purification.

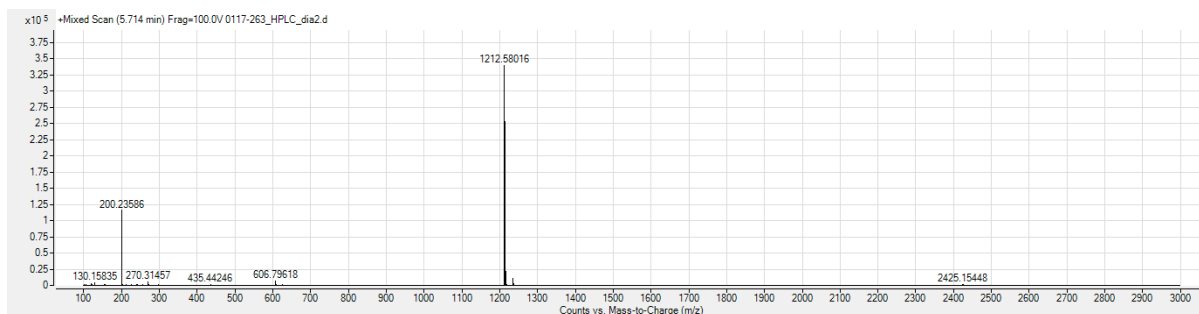

**LRMS (ESI-TOF):** calc'd for  $C_{26}H_{40}N_5O_5$   $[M+H]^+$  1212.59; found 1212.59.

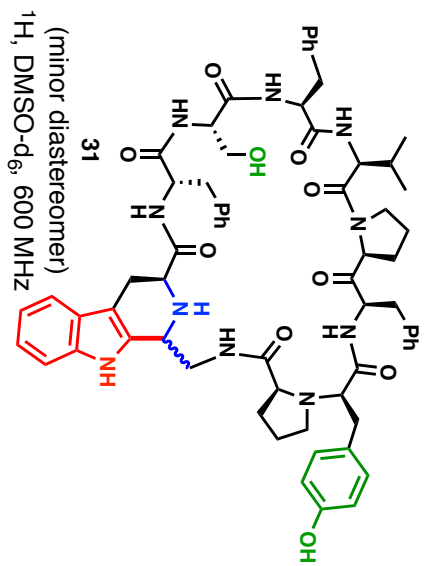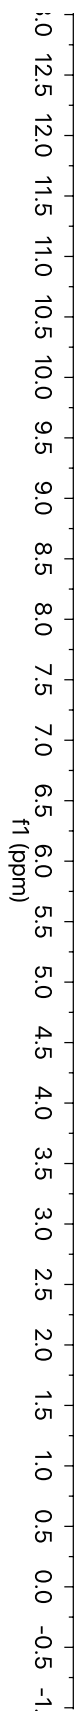



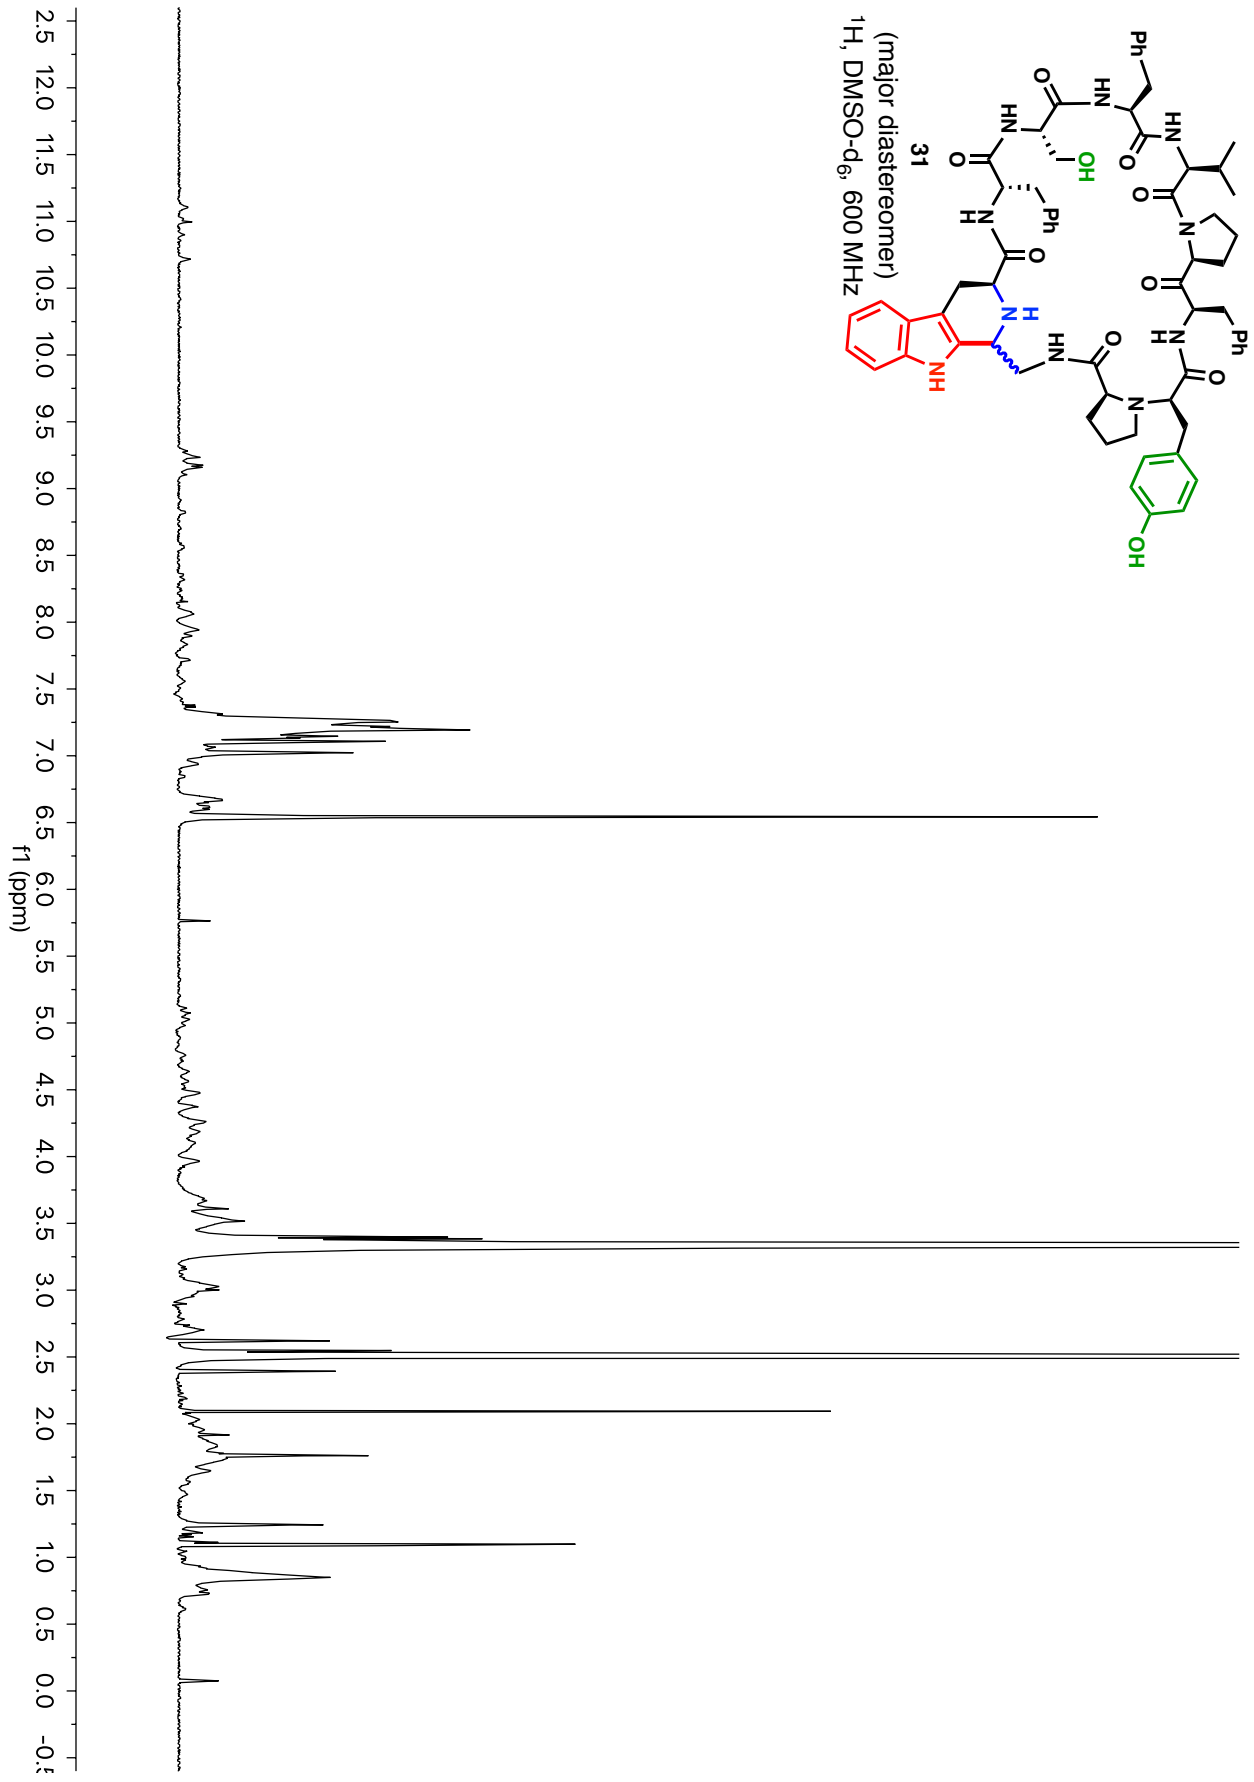

## Peptide 32

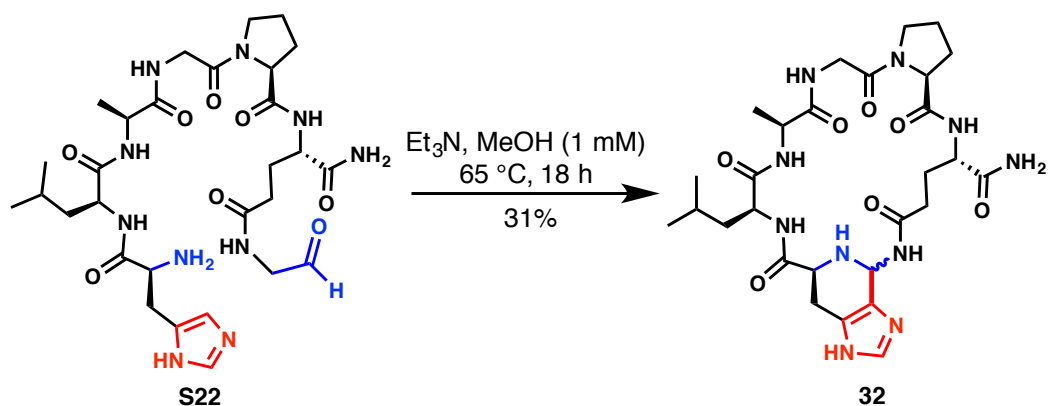

Peptide **32** was prepared according to a modified literature report.<sup>10</sup> To a solution of purified peptide aldehyde **S22** (6.8 mg, 10.3  $\mu\text{mol}$ ) in MeOH (1 mM) was added  $\text{Et}_3\text{N}$  (2 equiv.), and the resulting solution was heated to  $65\text{ }^\circ\text{C}$  and monitored by LC-MS analysis. At  $t = 30\text{ h}$ , the reaction was purified by preparative reverse-phase HPLC (5% B for 5 min, 5% to 40% B over 30 min) to afford peptide macrocycle **32** (2.1 mg, 31% yield) as a white solid following lyophilization.

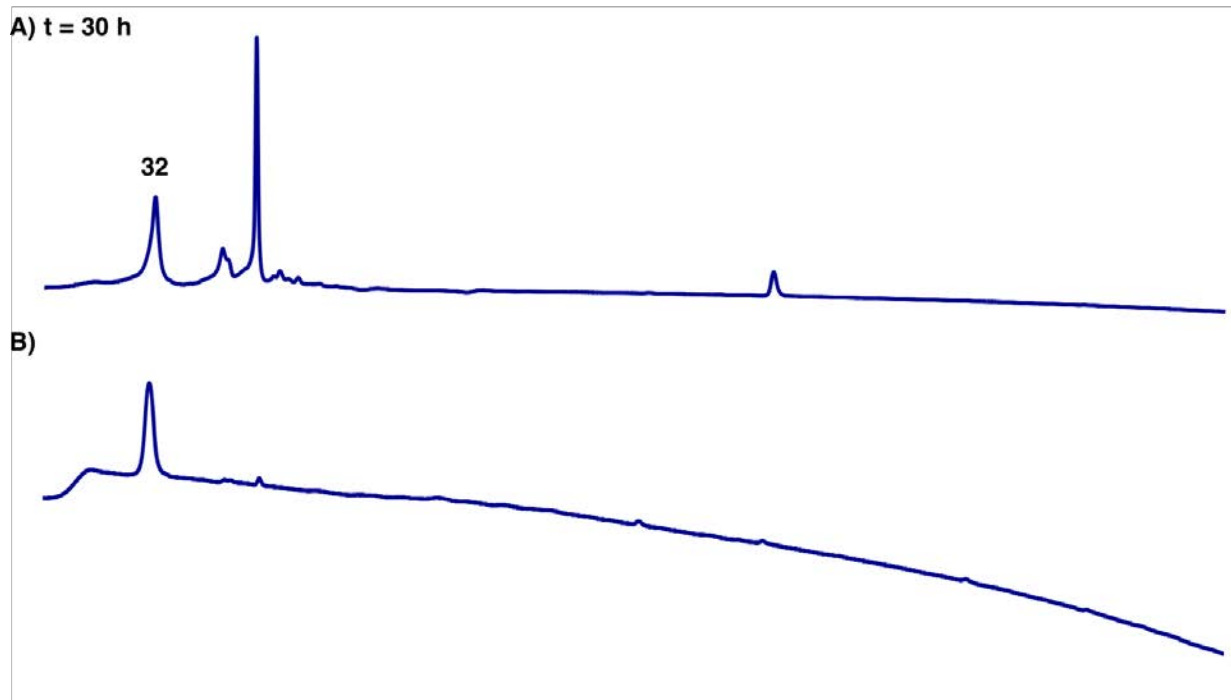

**A)** Crude analytical HPLC trace of the formation of **32** from amino aldehyde **S22** following Pictet-Spengler macrocyclization (5 to 100% B over 25 min,  $\lambda = 210$  nm). **B)** Purified peptide **32** ( $R_t = 7.00$  min, 5 to 100% B over 25 min,  $\lambda = 210$  nm).

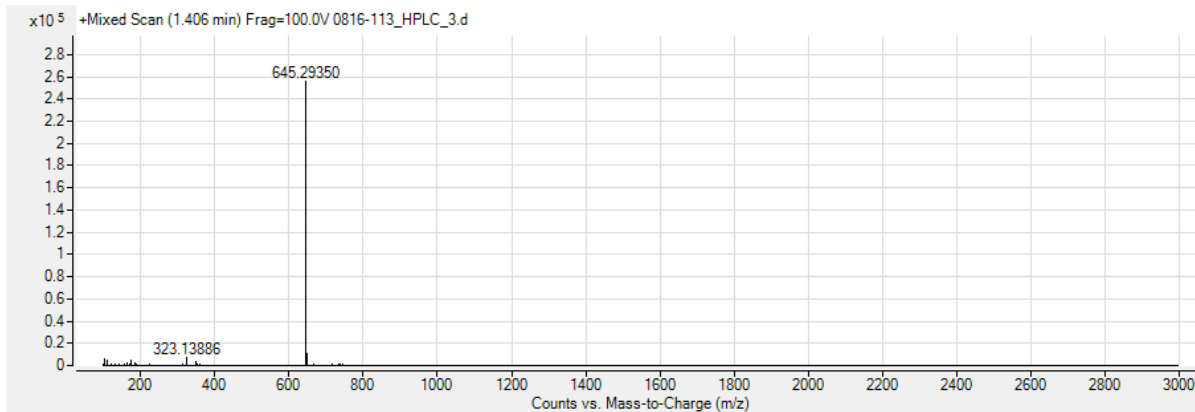

**LRMS (ESI-TOF):** calc'd for  $C_{29}H_{44}N_{10}O_7$   $[M+H]^+$  645.35; found 645.29,  $[M+2H]^{2+}$  323.18; found 323.14.

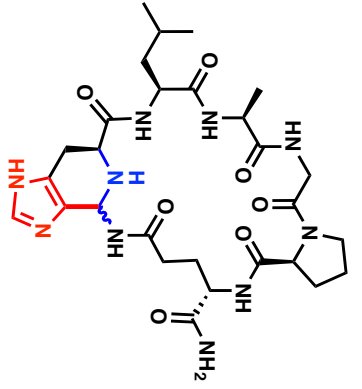

32

<sup>1</sup>H, DMSO-d<sub>6</sub>, 600 MHz

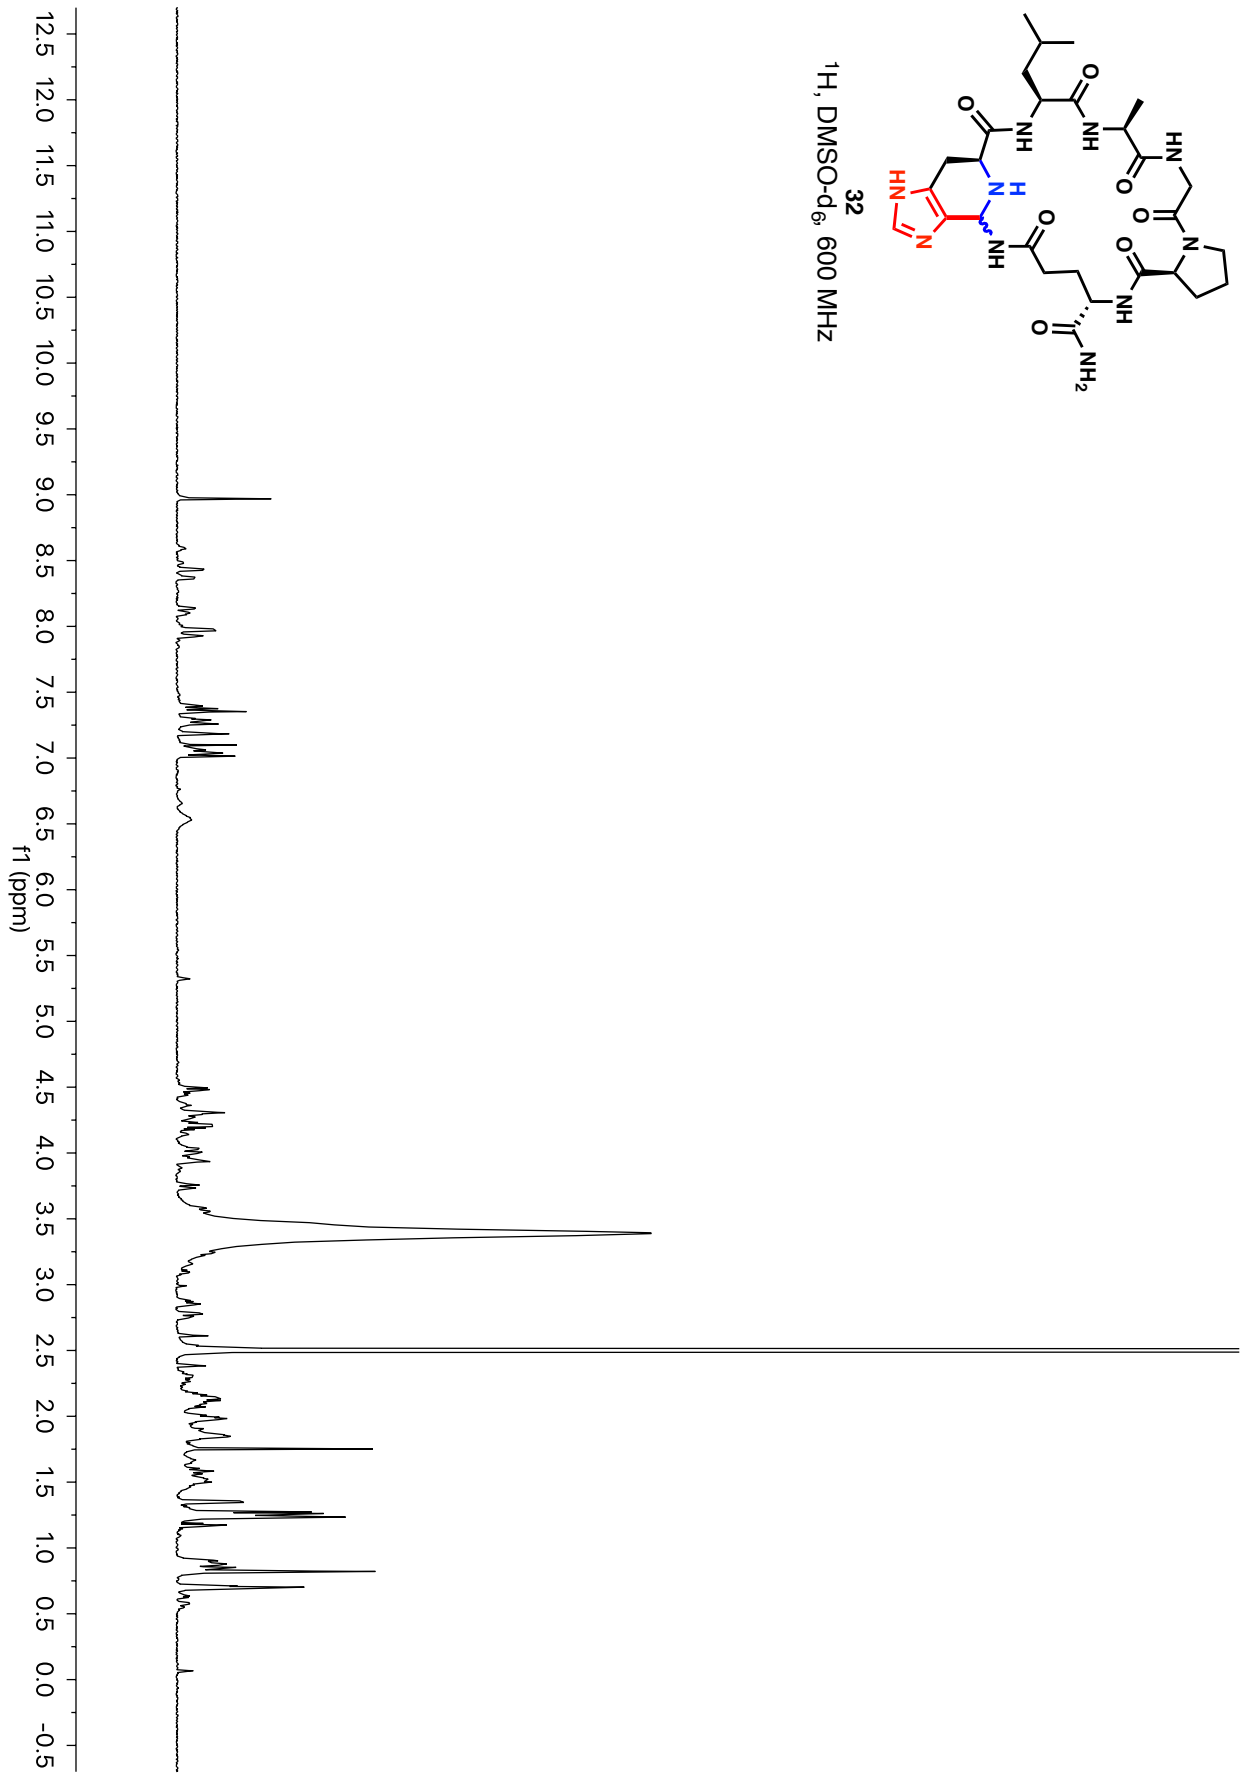

## Characterization Data for Thiazolidine Formation

### Peptide 33

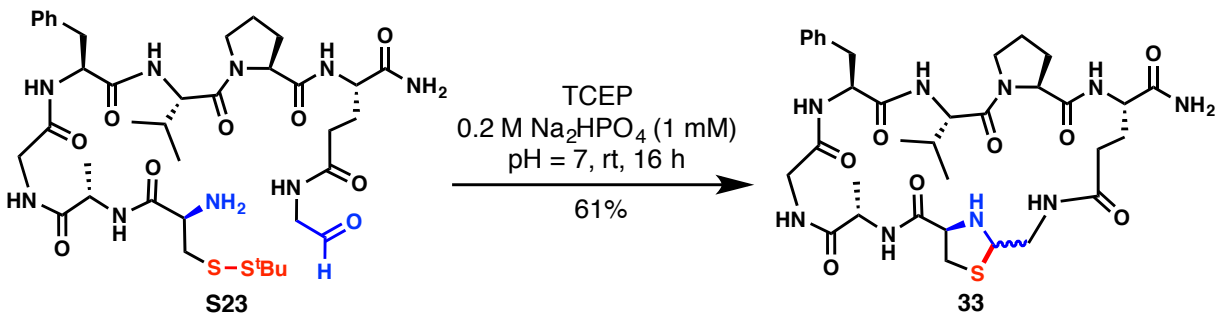

Peptide **33** was prepared according to general procedure 5 from S*t*Bu-disulfide protected linear amino aldehyde **S23** (4.5 mg, 5.3  $\mu$ mol). At  $t = 16$  h, the reaction was purified by preparative reverse-phase HPLC (20% B for 5 min, 20% to 50% B over 25 min) to afford peptide macrocycle **33** (2.4 mg, 61% yield) as a mixture of diastereomers and as a white solid following lyophilization.

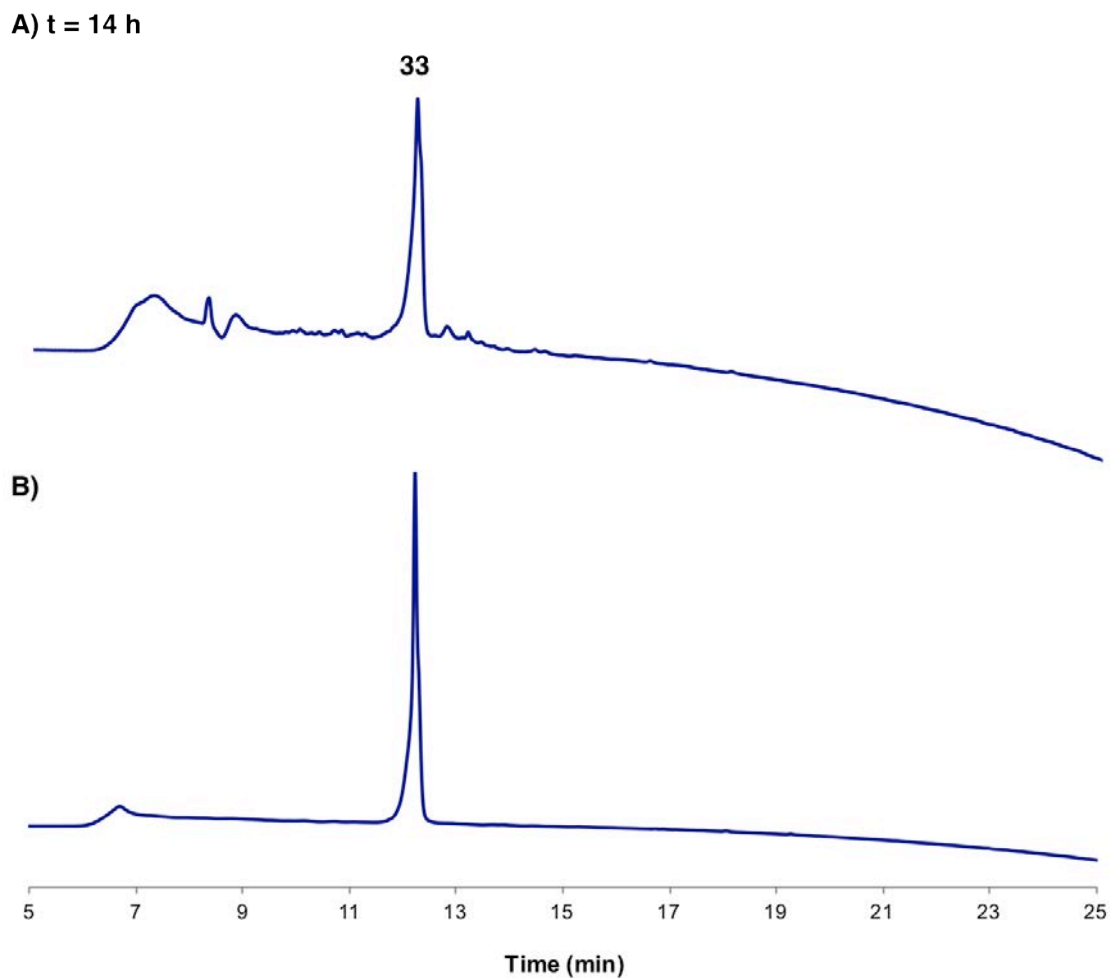

**A)** Crude analytical HPLC trace of the formation of **33** from amino aldehyde **S23** following thiazolidine macrocyclization (0 to 100% B over 25 min,  $\lambda = 210$  nm). **B)** Purified peptide **33** ( $R_t = 12.2$  min, 0 to 100% B over 25 min,  $\lambda = 210$  nm).

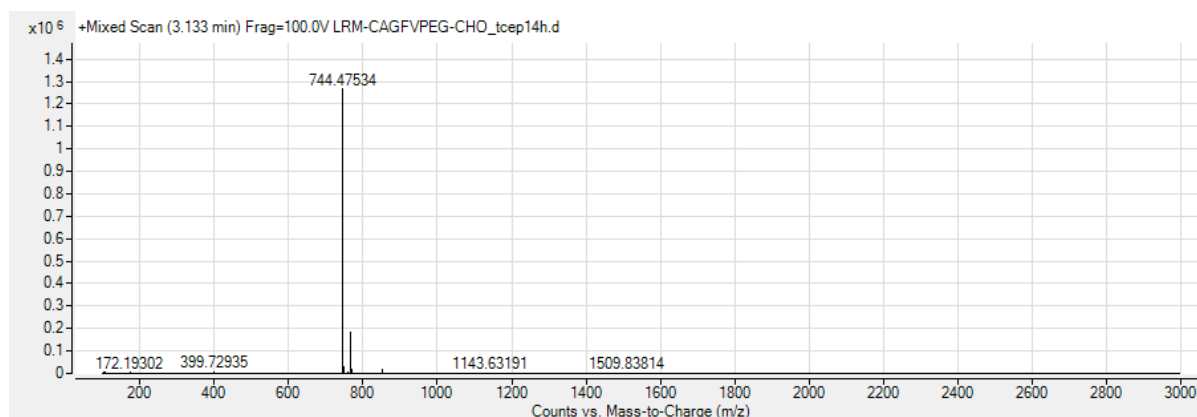

**LRMS (ESI-TOF):** calc'd for  $C_{34}H_{50}N_9O_8S$   $[M+H]^+$  744.35; found 744.48.

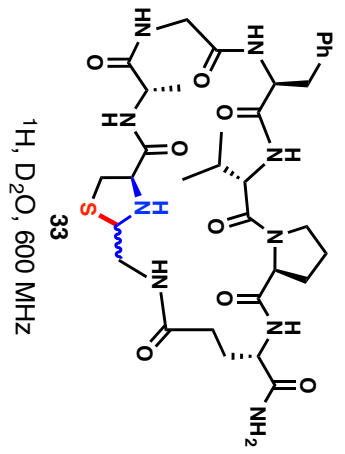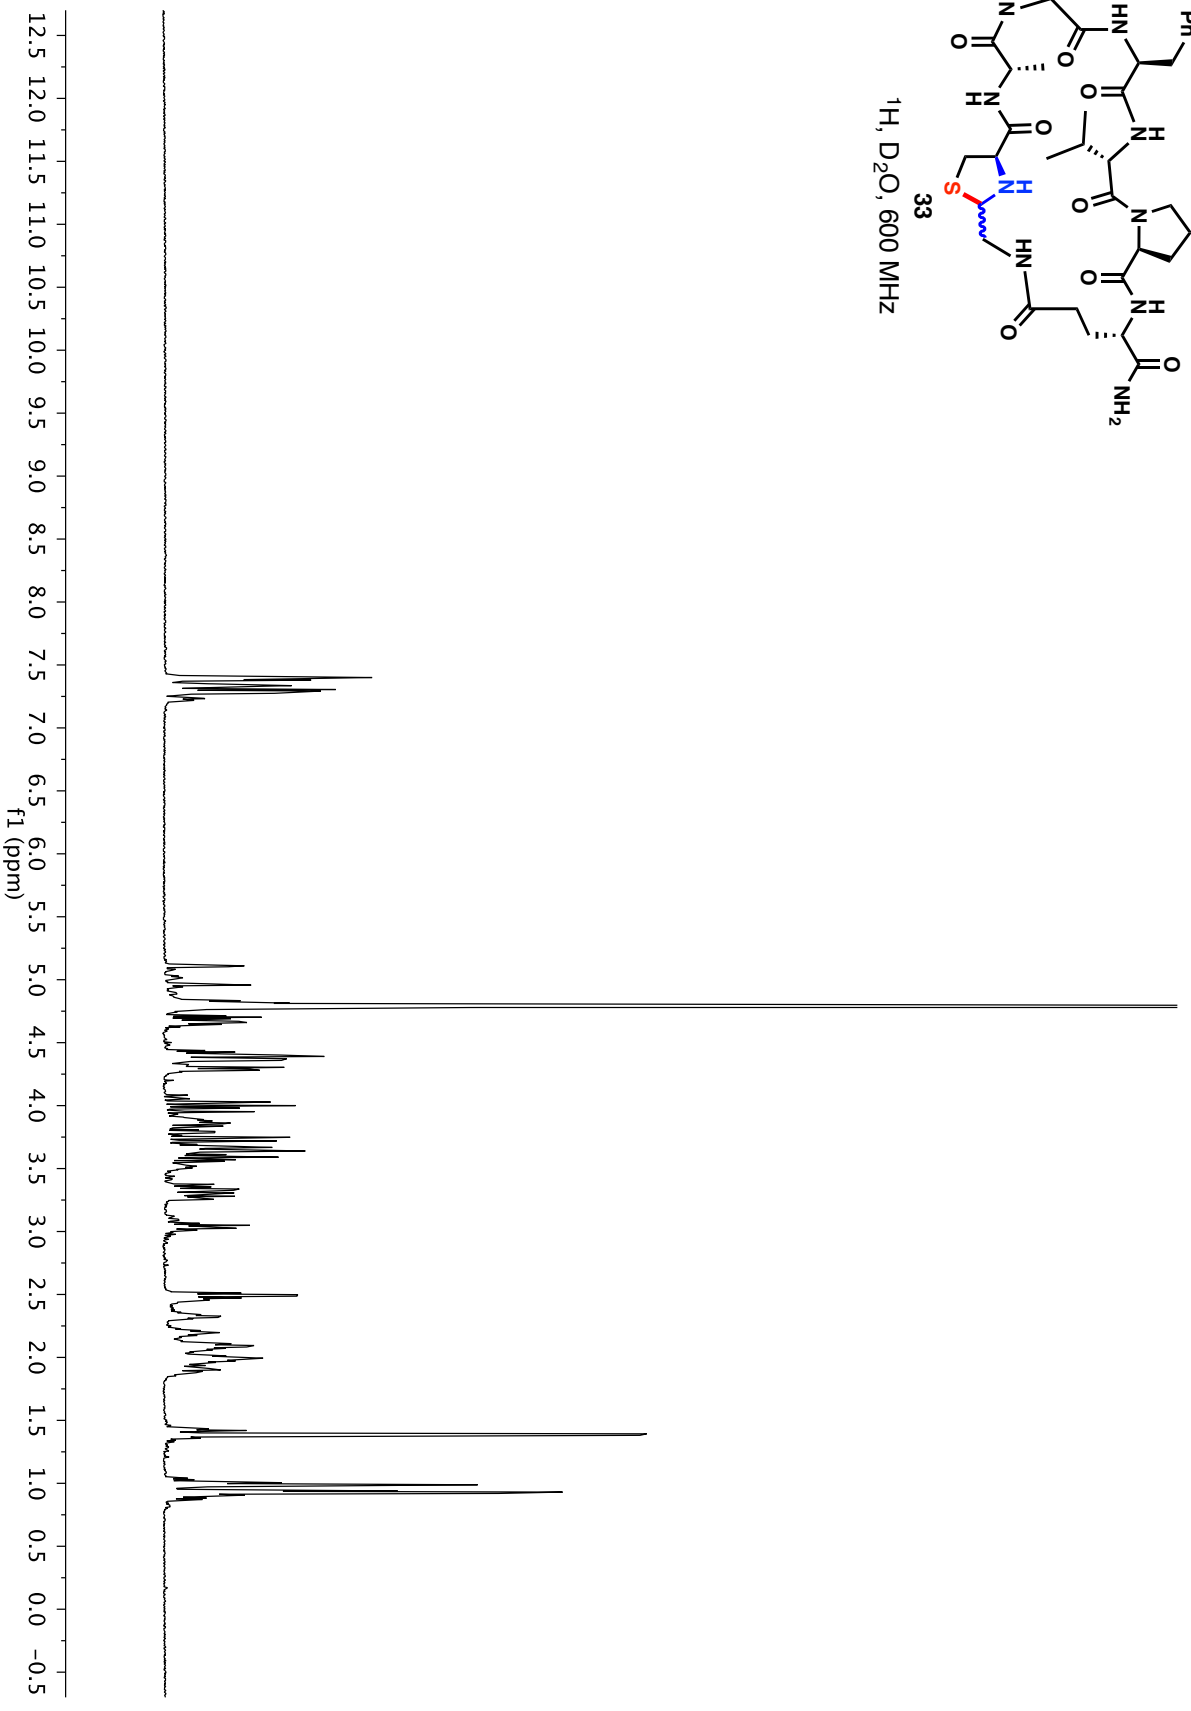

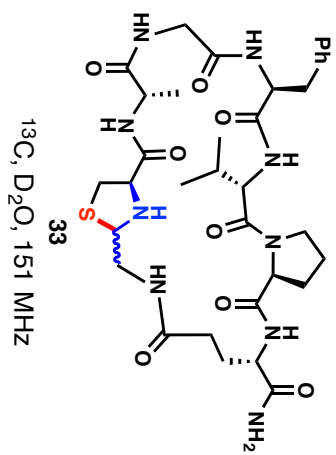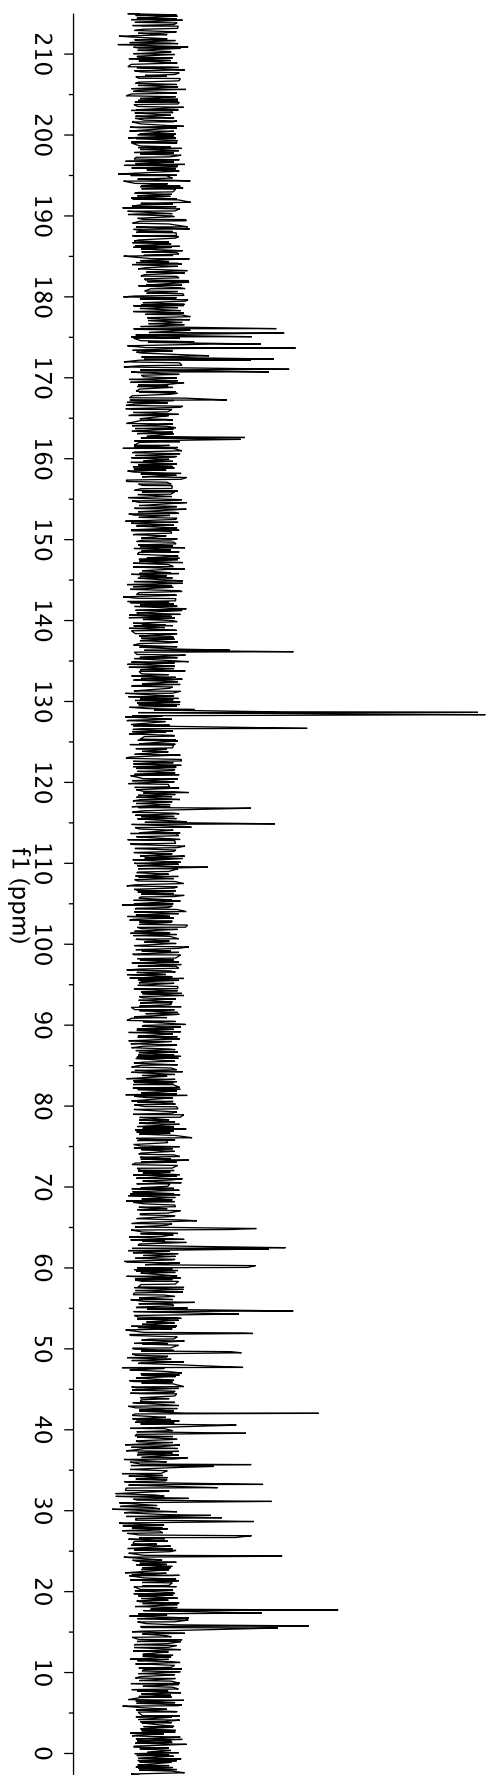



33  
COSY, DMSO-d<sub>6</sub>, 600 MHz

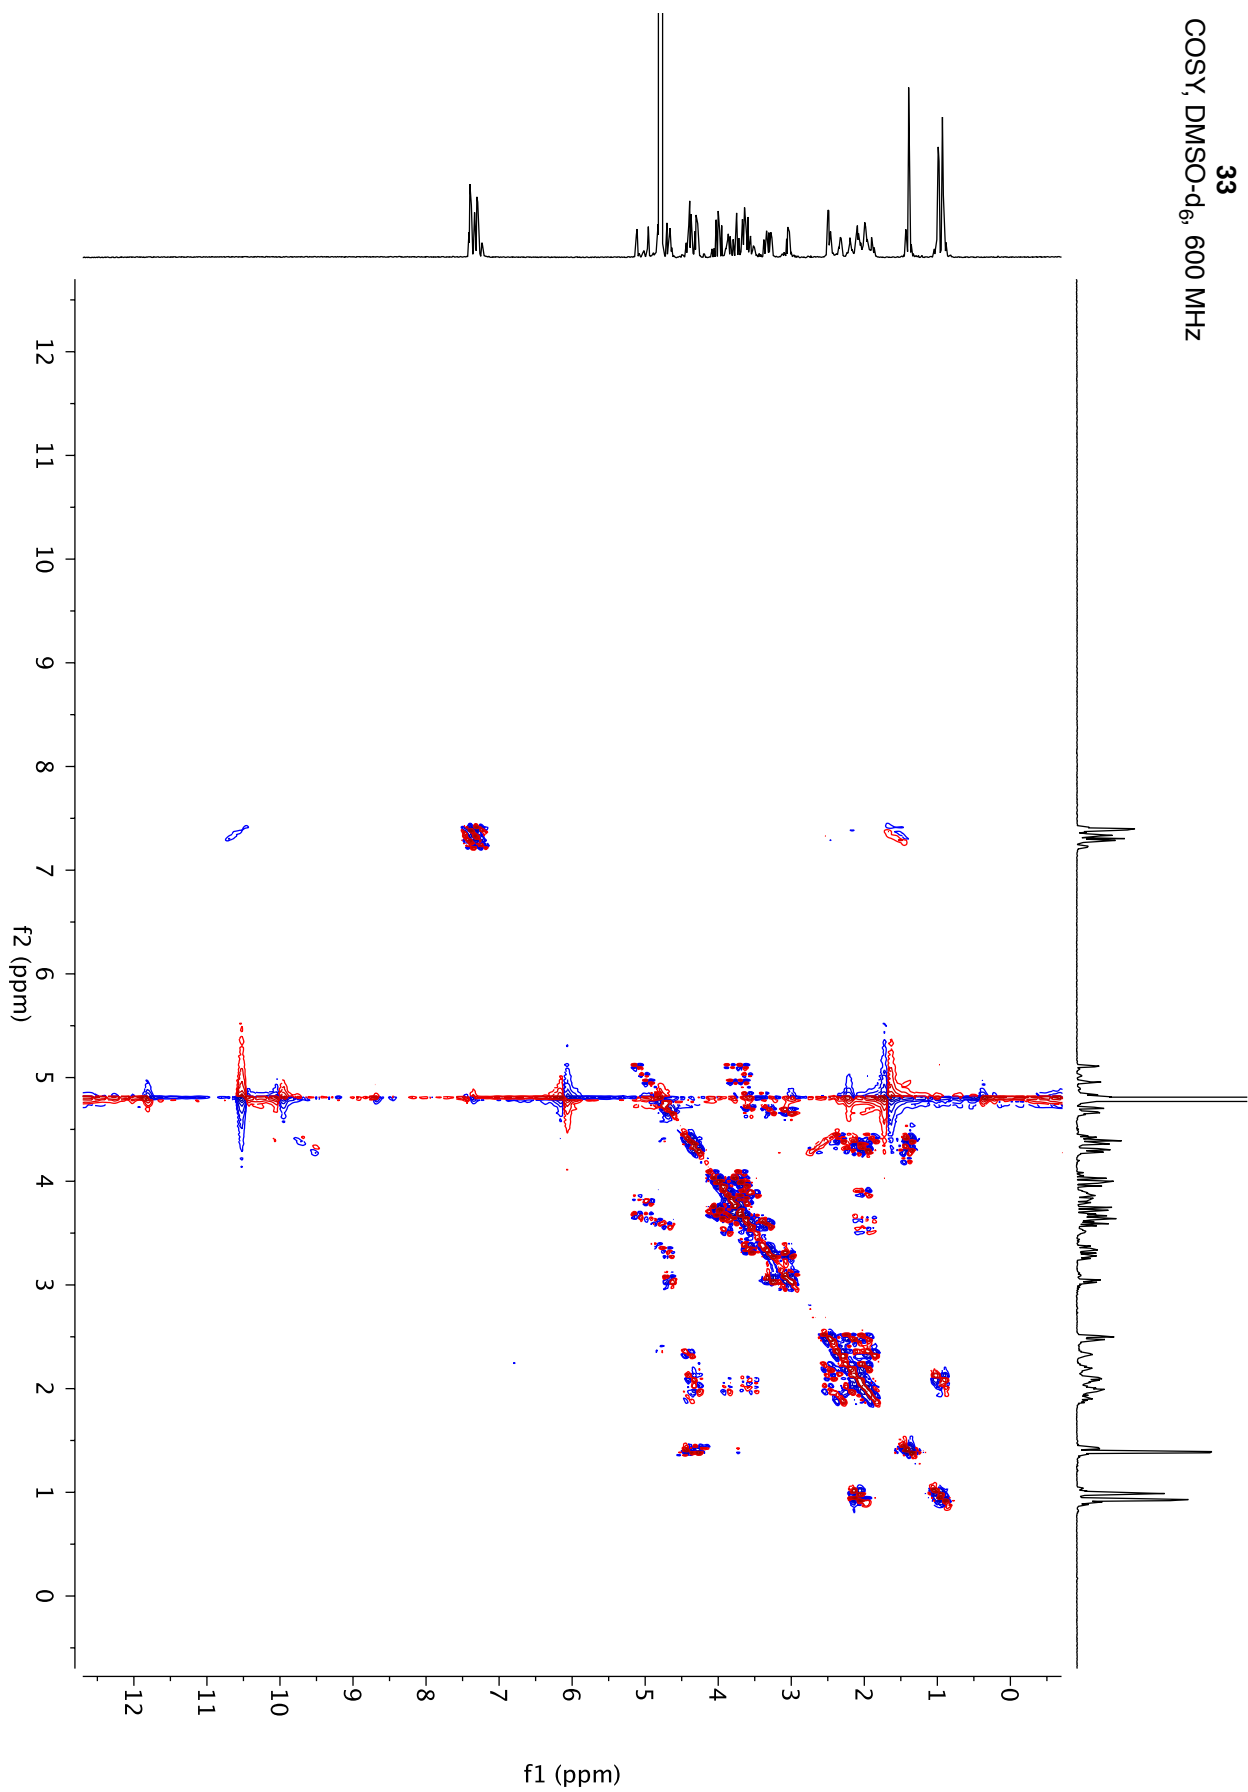

S237

## Peptide 34

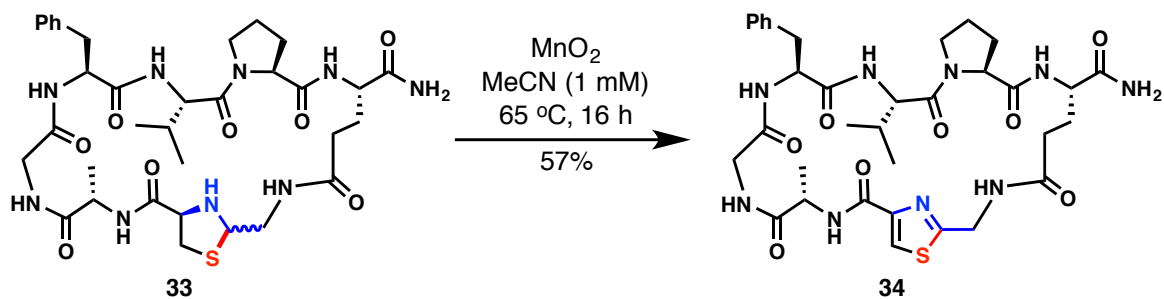

Peptide **34** was prepared from diastereomeric thiazolidines **33** upon oxidation with  $\text{MnO}_2$ . Peptide **33** (2.0 mg, 2.7  $\mu\text{mol}$ ) was dissolved in MeCN (1 mM concentration) and treated with 50 eq. of  $\text{MnO}_2$ . The reaction was heated at  $65\text{ }^\circ\text{C}$  and monitored by LC-MS. At  $t = 16\text{ h}$ , the reaction was filtered and purified by preparative reverse-phase HPLC (20% B for 5 min, 20% to 50% B over 30 min) to afford peptide thiazole **34** (1.1 mg, 57% yield) as a white solid following lyophilization.

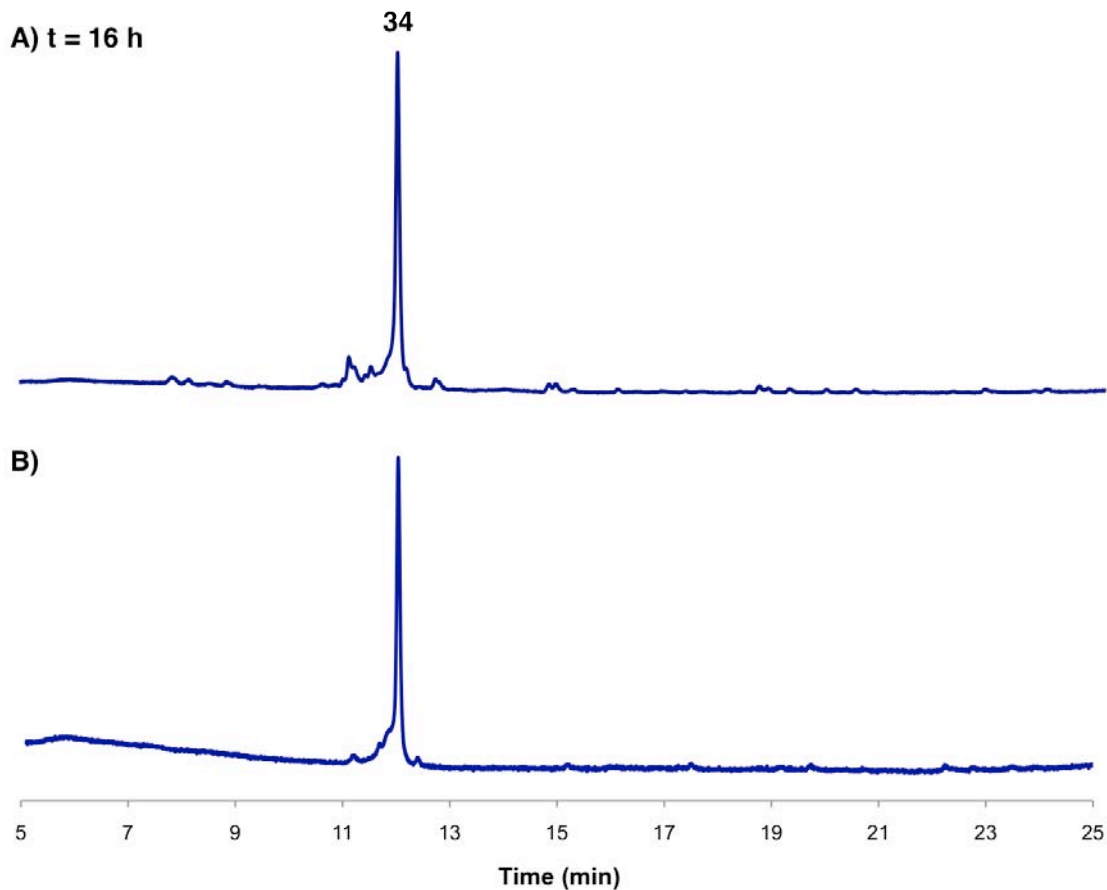

**A)** Crude analytical HPLC trace of the formation of **34** from thiazolidine **33** following oxidation (5 to 100% B over 25 min,  $\lambda = 230$  nm). **B)** Purified peptide **34** ( $R_t = 12.0$  min, 5 to 100% B over 25 min,  $\lambda = 230$  nm).

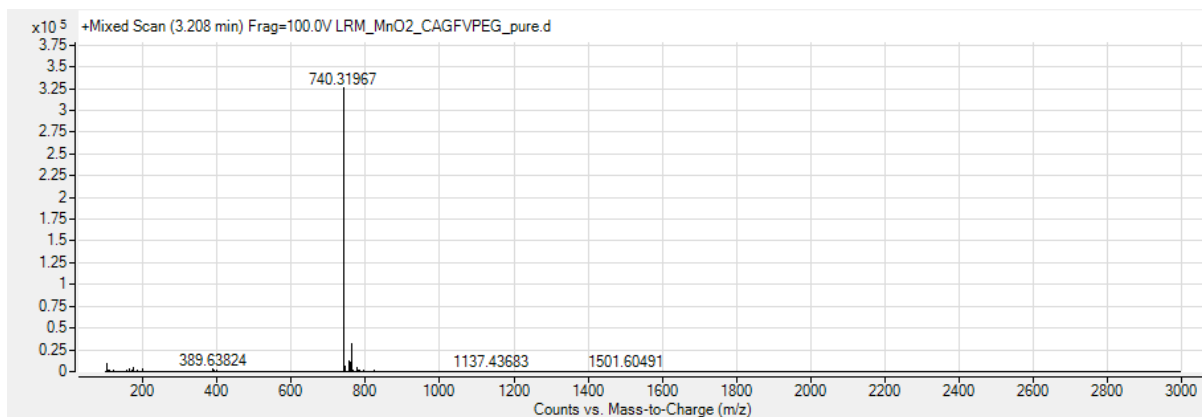

**LRMS (ESI-TOF):** calc'd for  $C_{34}H_{46}N_9O_8S$   $[M+H]^+$  740.32; found 740.32.

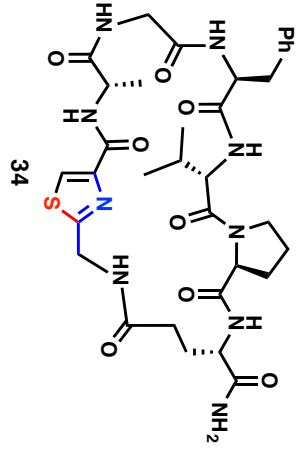

$^1\text{H}$ , DMSO- $d_6$ , 600 MHz

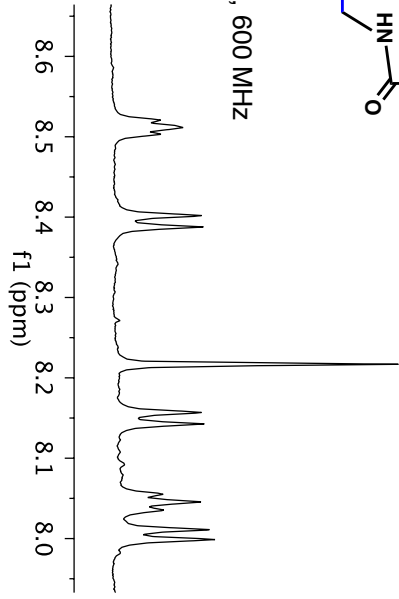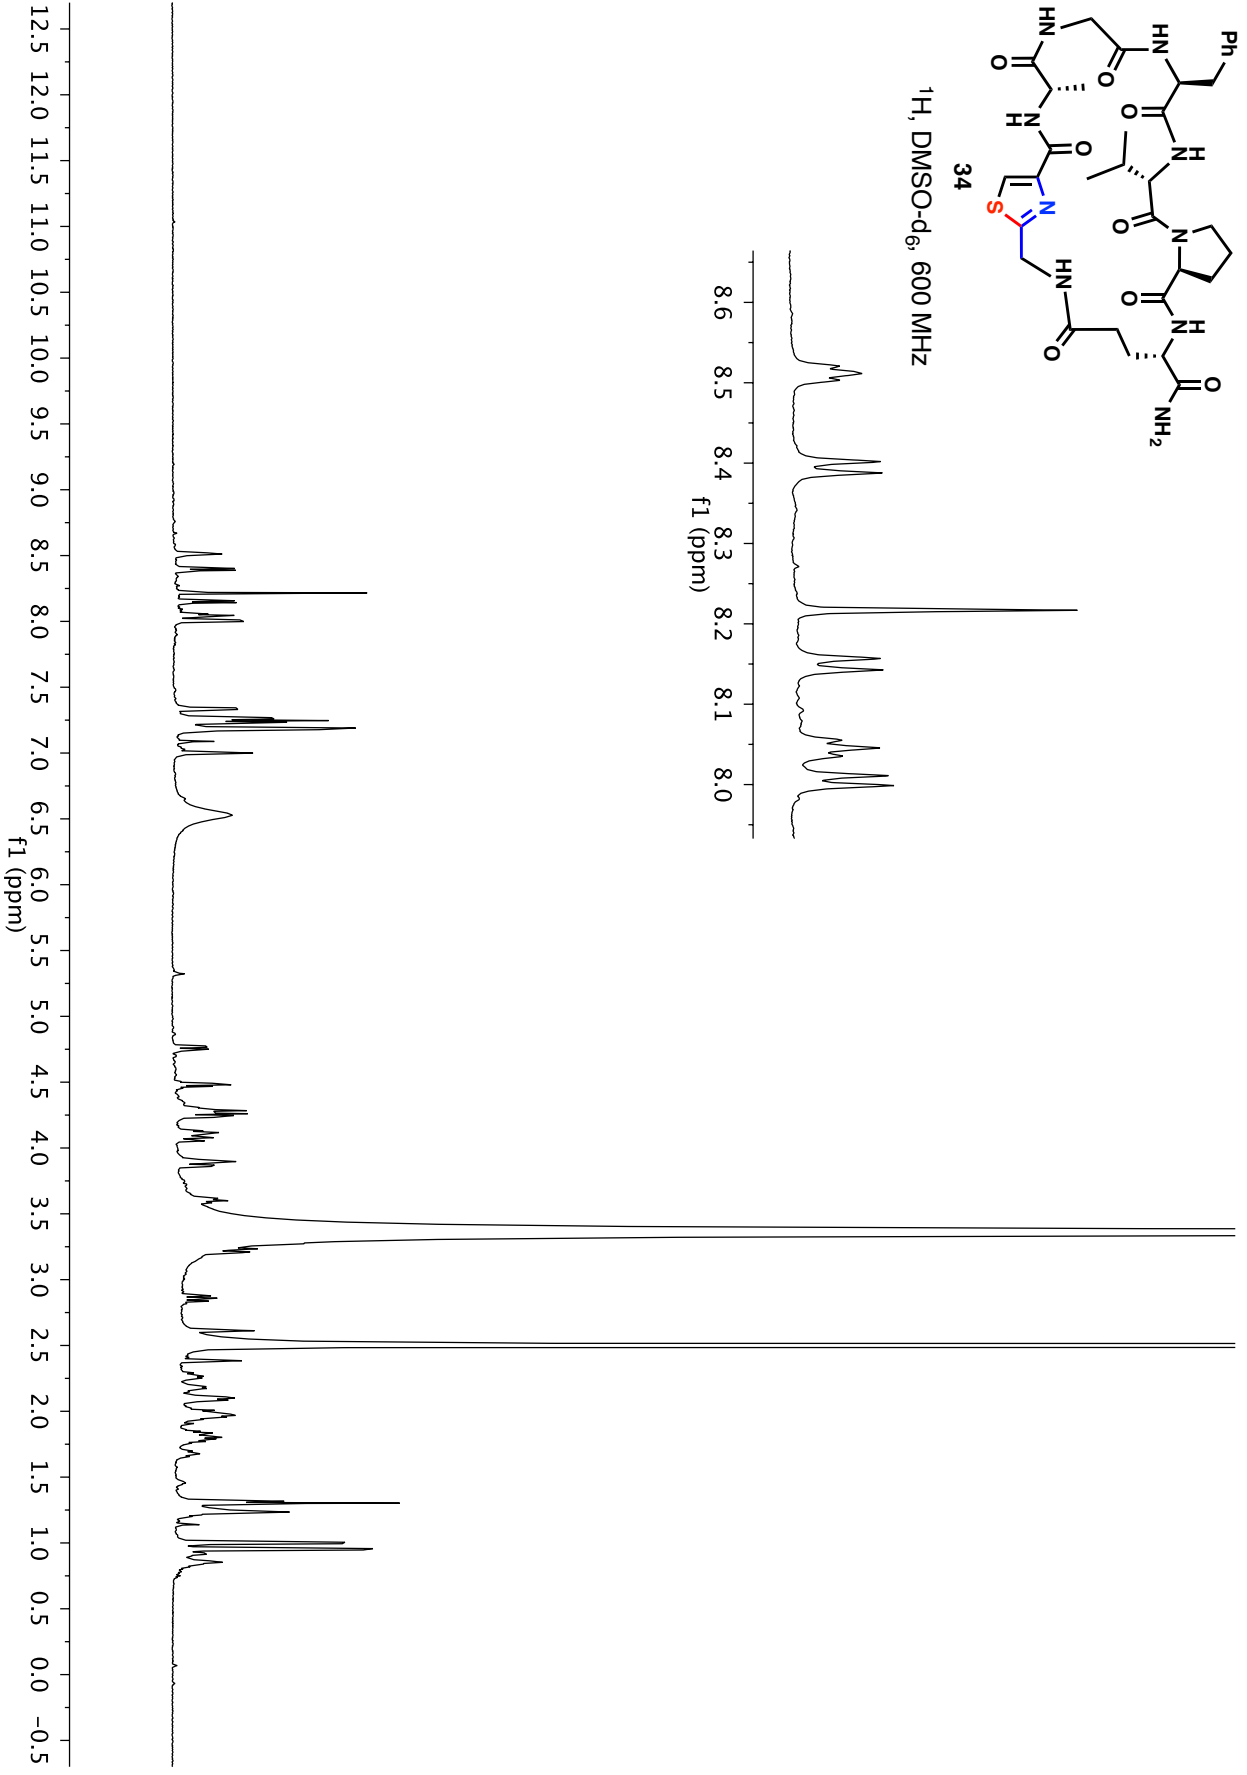

34  
COSY, DMSO-d<sub>6</sub>, 600 MHz

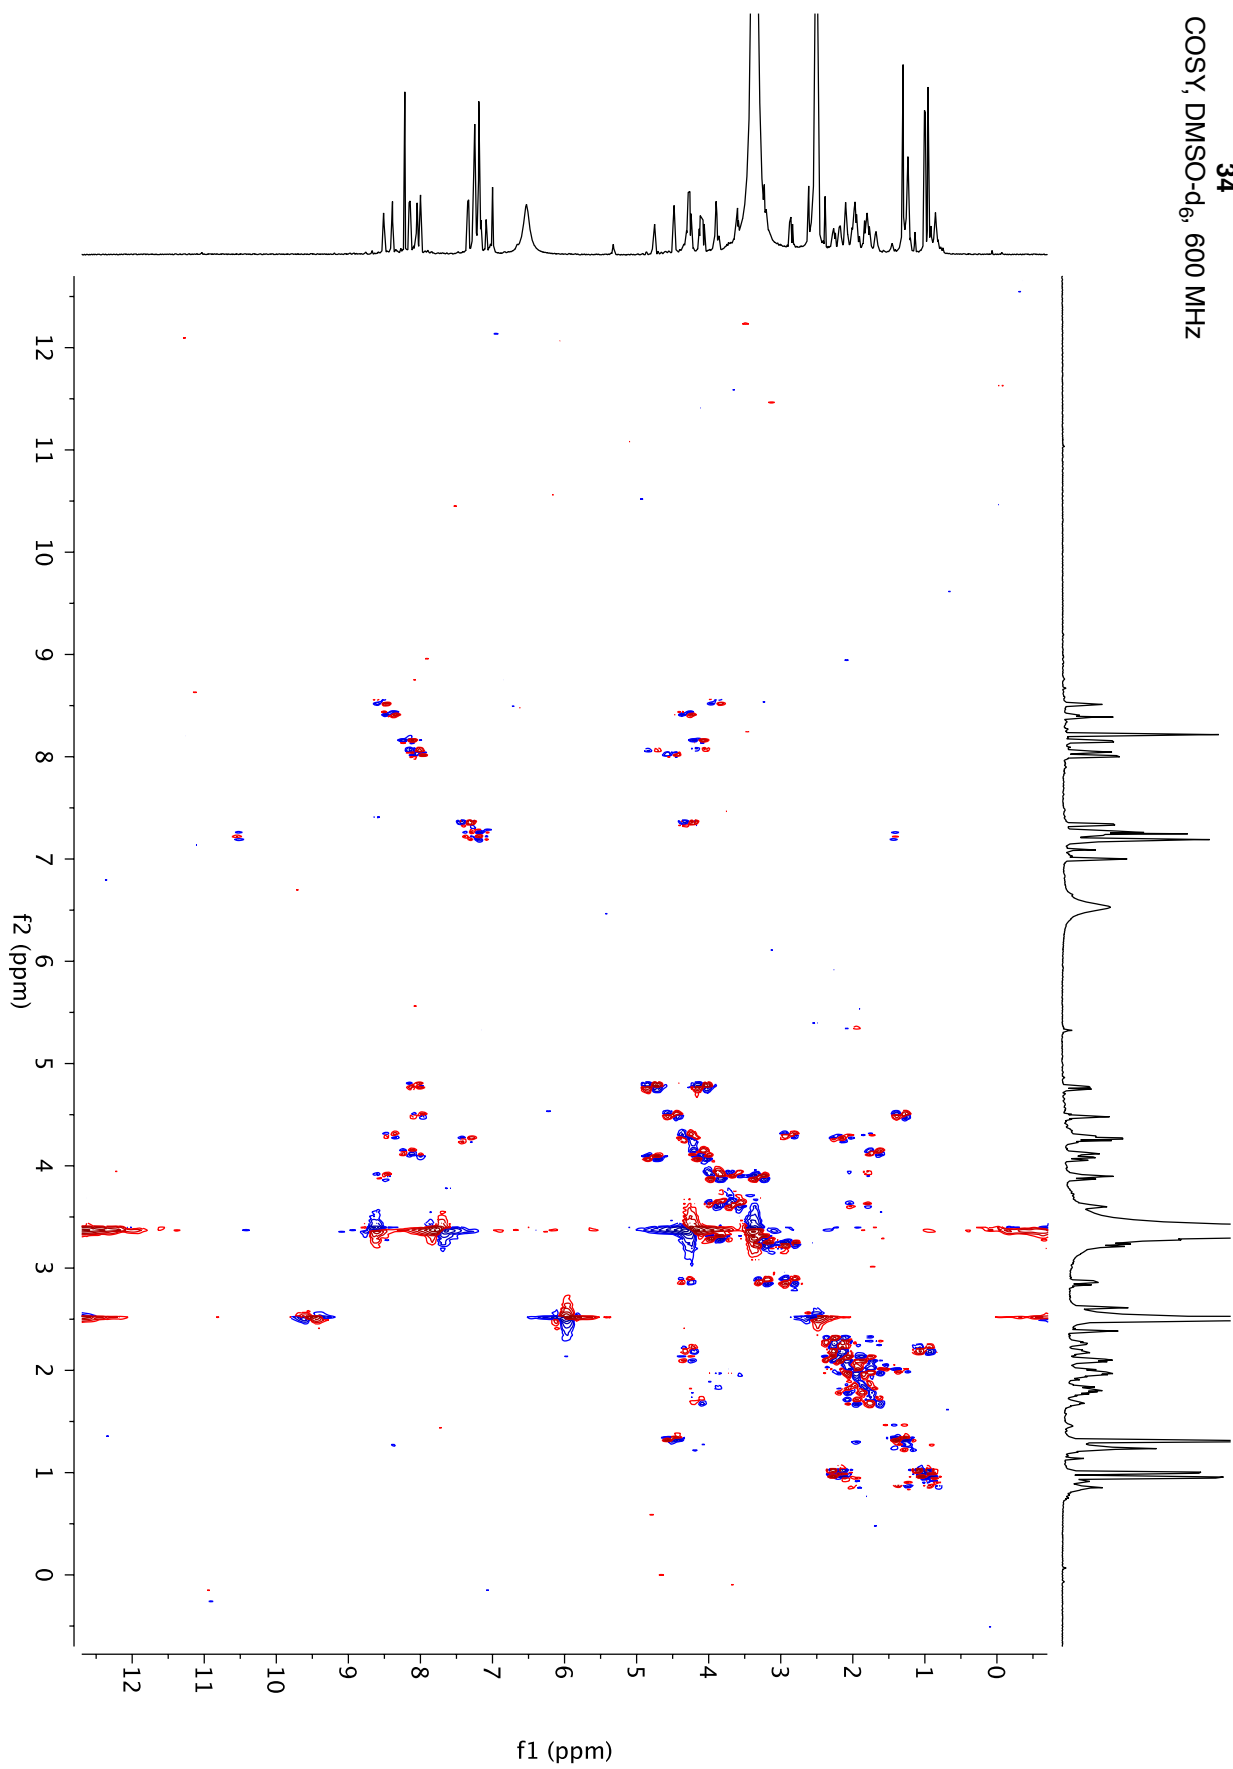

## Peptide 35

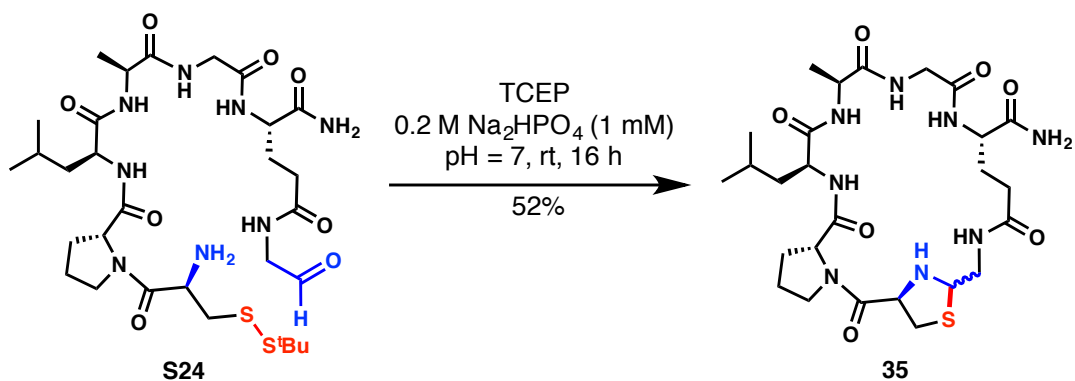

Peptide **35** was prepared according to general procedure 5 from *t*Bu-disulfide protected linear amino aldehyde **S24** (10.0 mg, 14  $\mu$ mol). At  $t = 6$  h, the reaction was purified by preparative reverse-phase HPLC (10% B for 10 min, 10% to 45% B over 35 min) to afford peptide macrocycle **35** (4.4 mg, 52% yield) as a mixture of diastereomers and as a white solid following lyophilization.

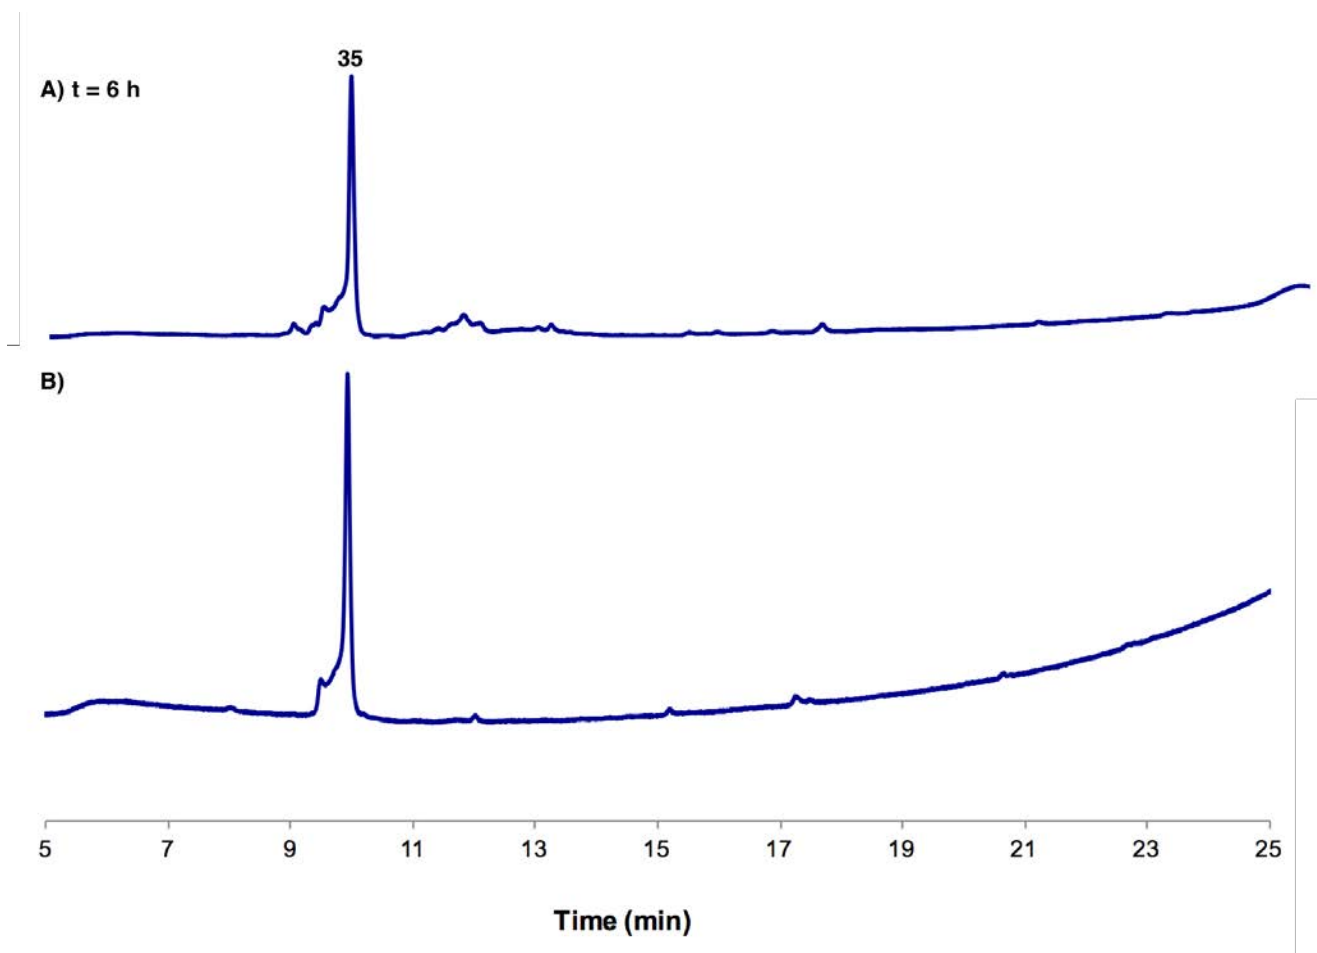

**A)** Crude analytical HPLC trace of the formation of **35** from amino aldehyde **S24** following thiazolidine formation (5 to 100% B over 25 min,  $\lambda = 230$  nm). **B)** Purified peptide **35** ( $R_t = 12.64$  min, 5 to 100% B over 25 min,  $\lambda = 230$  nm).

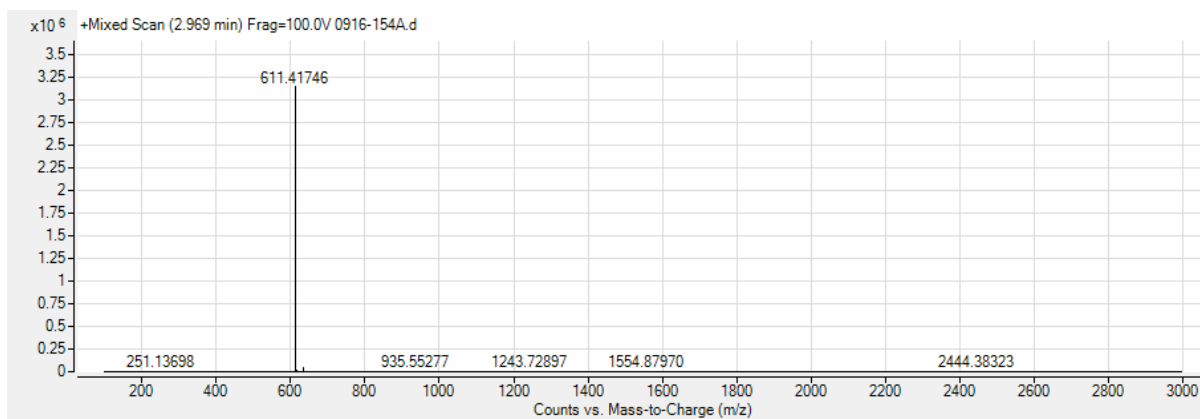

**LRMS (ESI-TOF):** calc'd for  $C_{26}H_{42}N_8O_7S$   $[M+H]^+$  611.30; found 611.42.

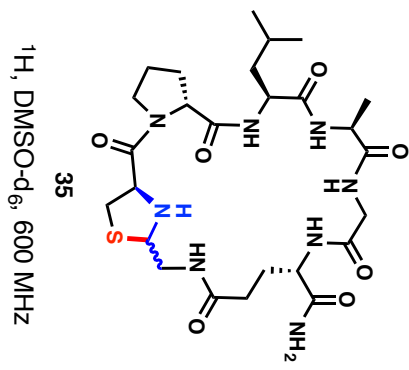

<sup>1</sup>H, DMSO-d<sub>6</sub>, 600 MHz

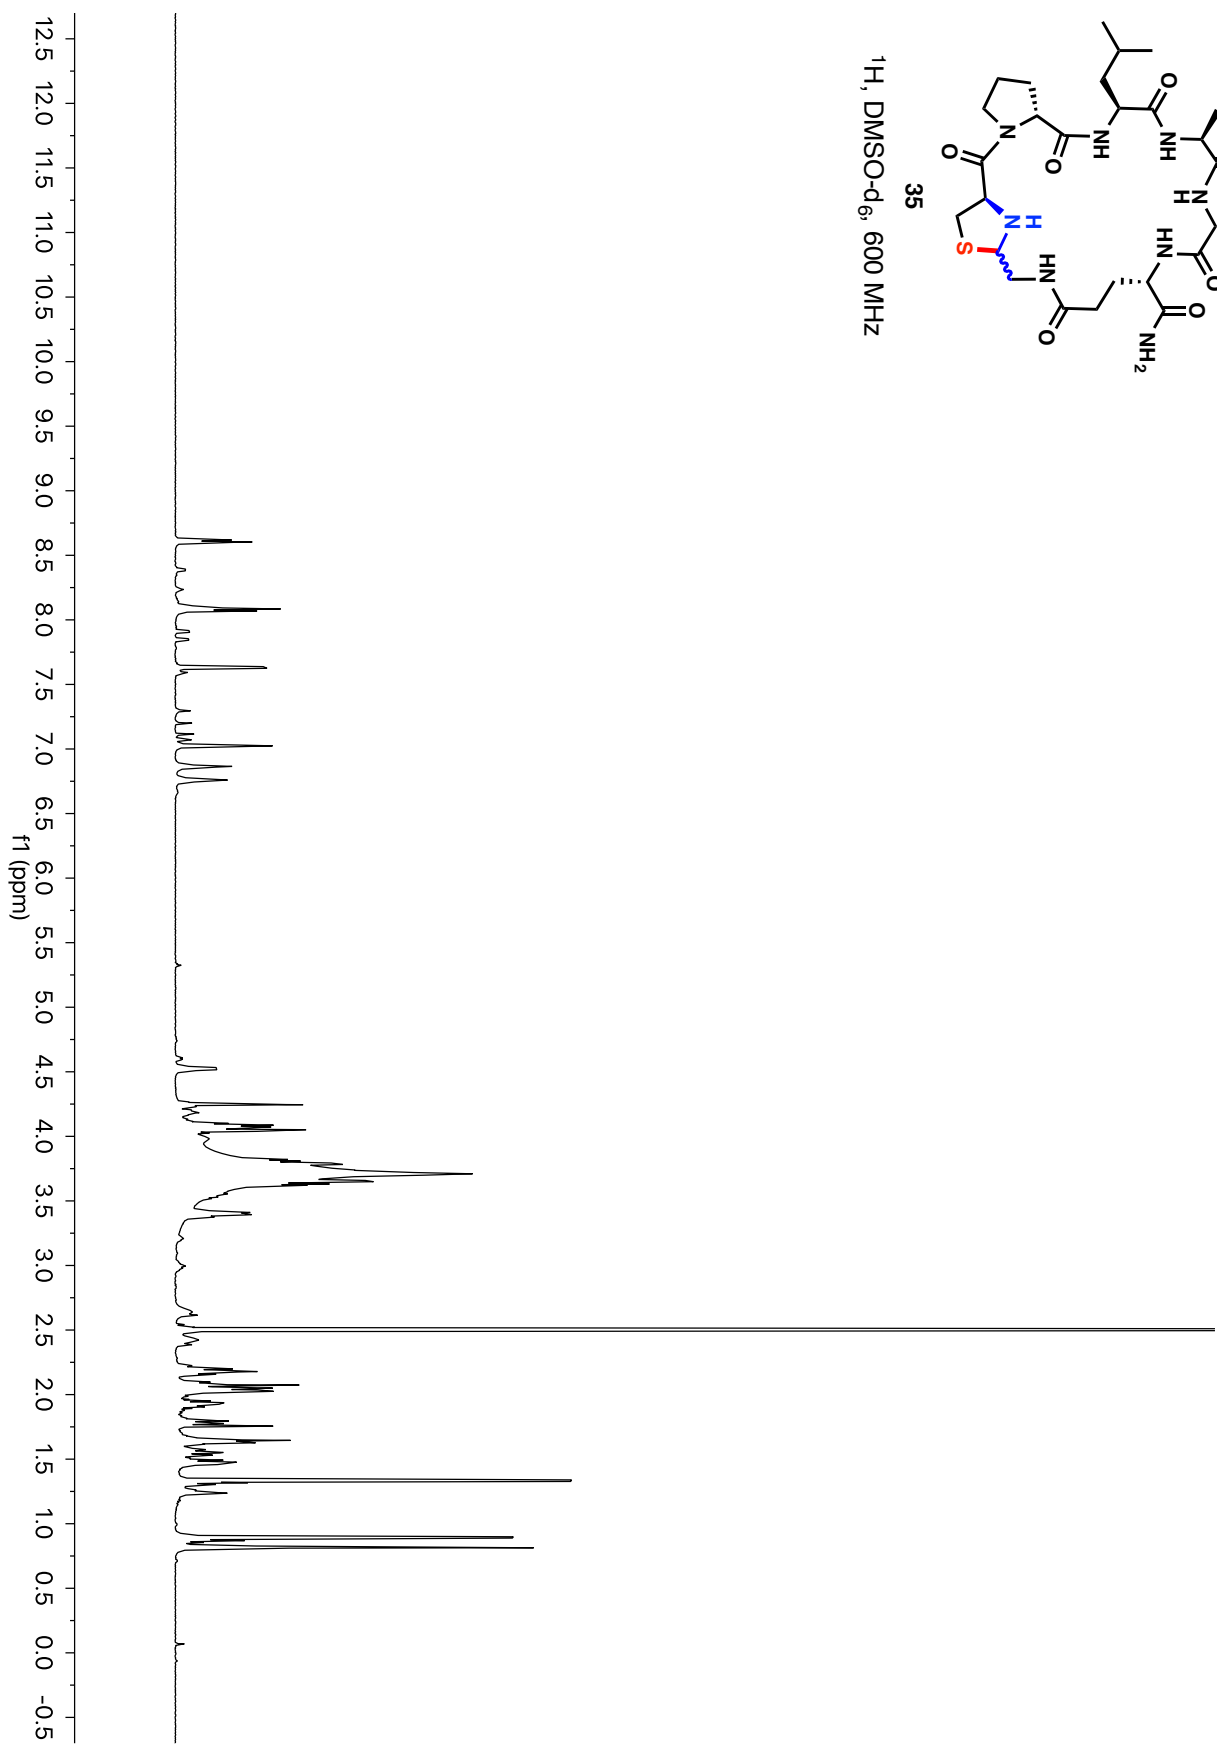



35  
COSY, DMSO-d<sub>6</sub>, 600 MHz

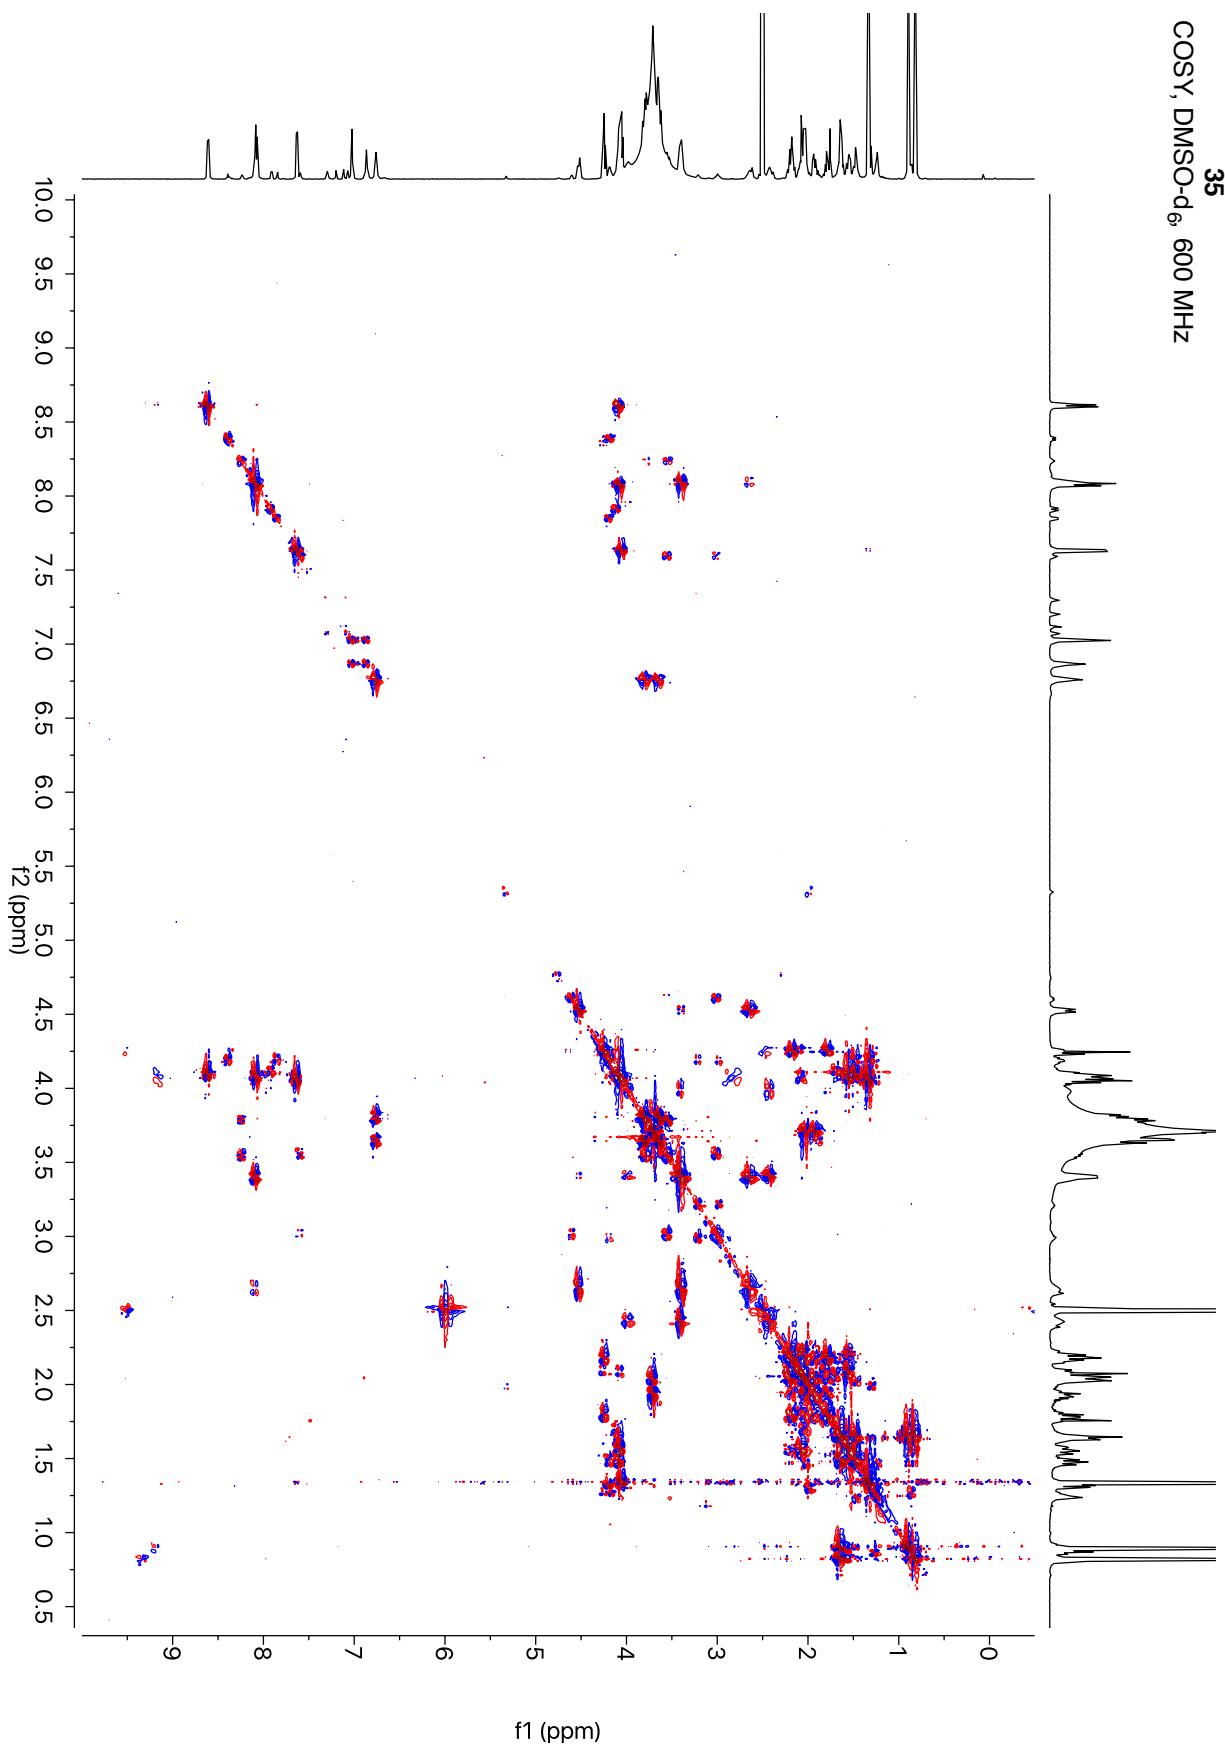

S245

## Characterization Data for Selenazolidine Formation

### Peptide 36

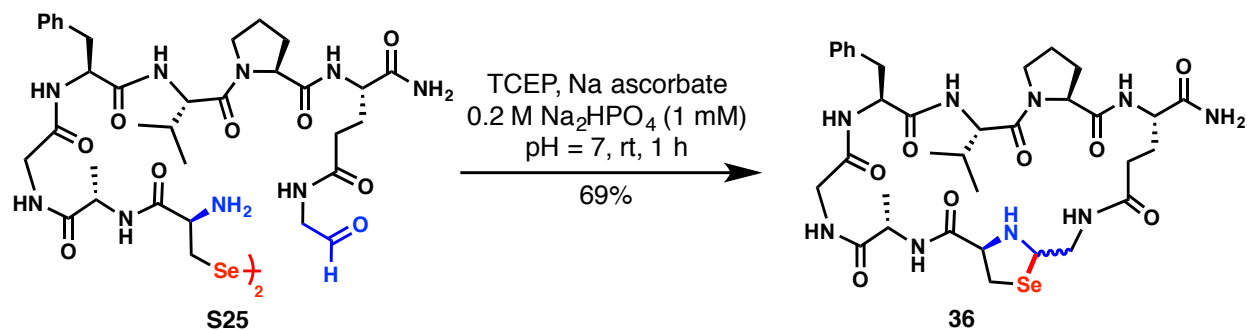

Peptide **36** was prepared according to general procedure 6 from linear amino aldehyde selenocystine dimer **S25** (3.7 mg, 2.3  $\mu$ mol). At  $t = 1$  h, the reaction was purified by preparative reverse-phase HPLC (20% B for 5 min, 20% to 60% B over 25 min) to afford peptide macrocycle **36** (2.5 mg, 69% yield) as a mixture of diastereomers and as a white solid following lyophilization.

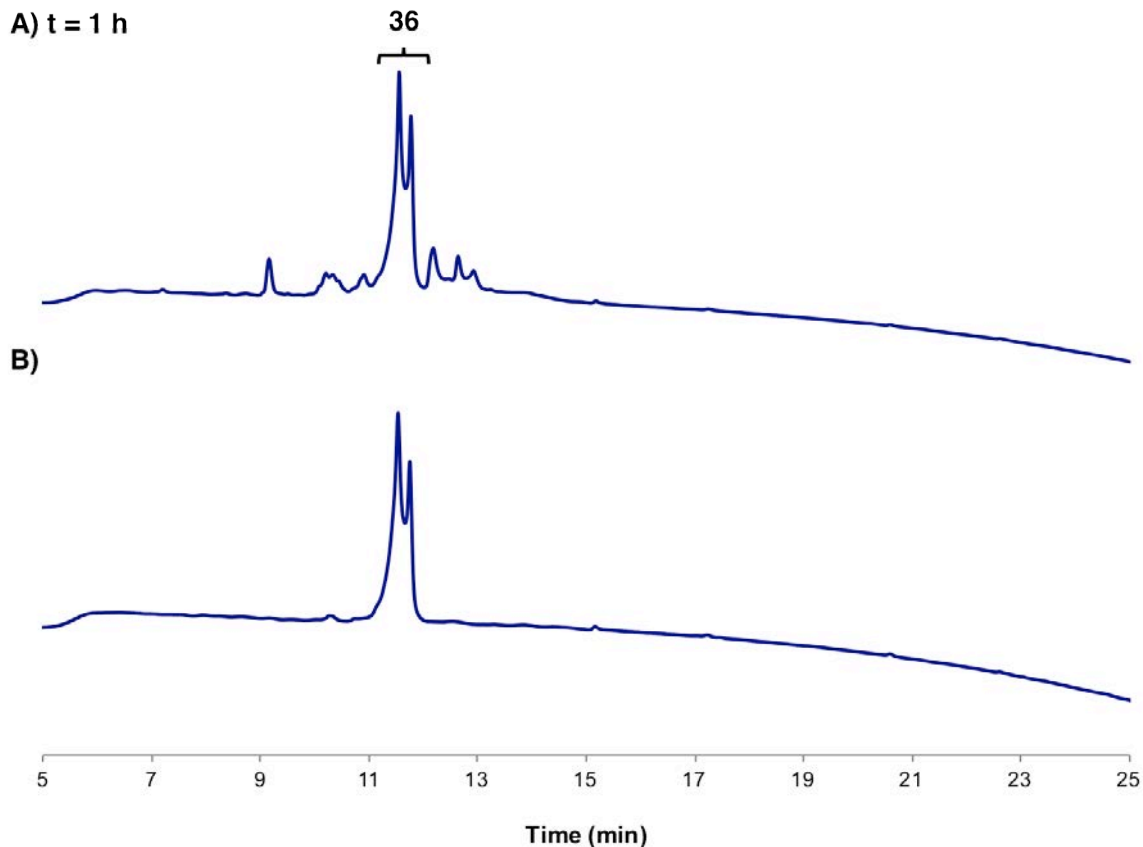

**A)** Crude analytical HPLC trace of the formation of **36** from amino aldehyde **S25** following selenazolidine macrocyclization (5 to 100% B over 25 min,  $\lambda = 210$  nm). **B)** Purified peptide **36** ( $R_t = 11.5, 11.7$  min, 0 to 100% B over 25 min,  $\lambda = 210$  nm).

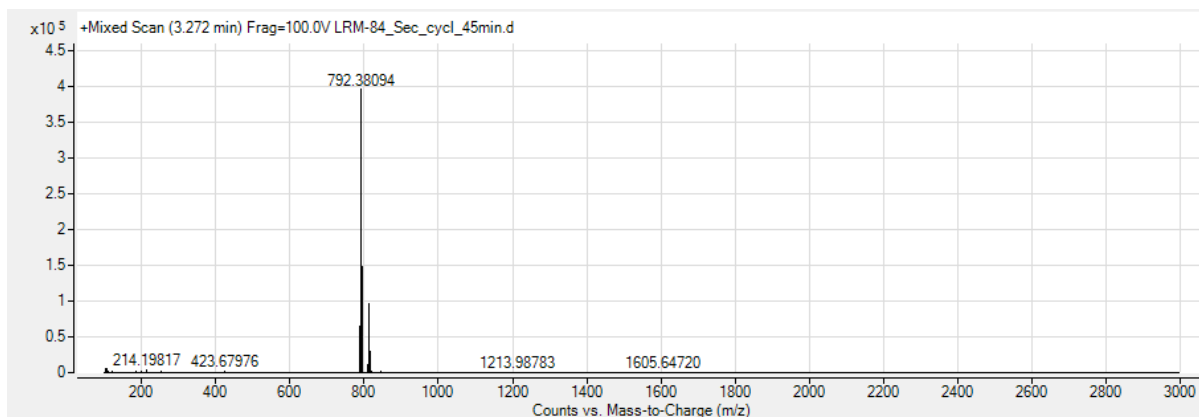

**LRMS (ESI-TOF):** calc'd for  $C_{34}H_{50}N_9O_8Se$   $[M+H]^+$  792.29; found 792.38.

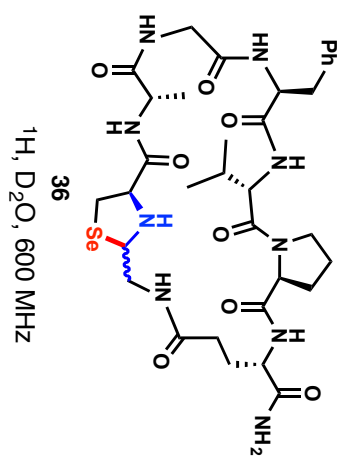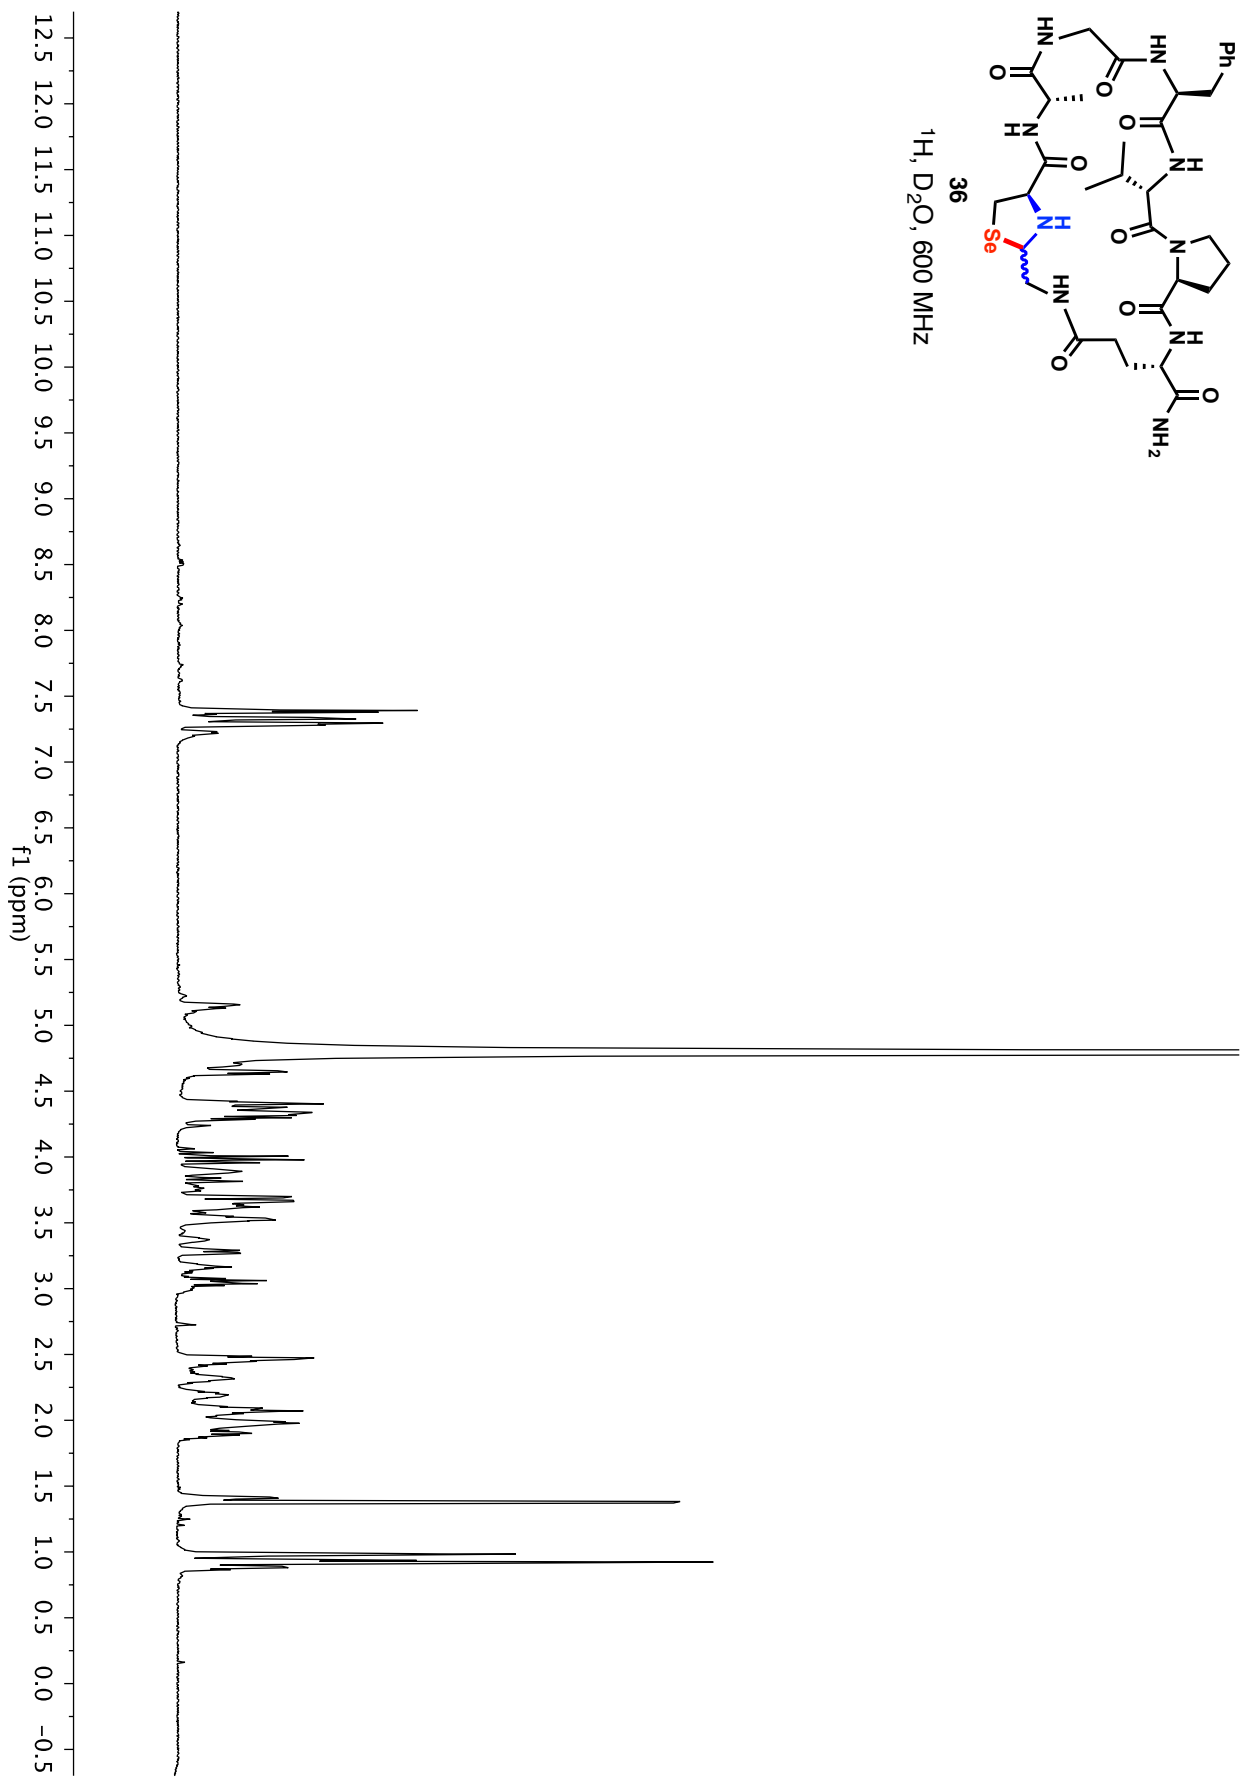

## Characterization Data for Scytonemide A Analogues

### Peptide S26

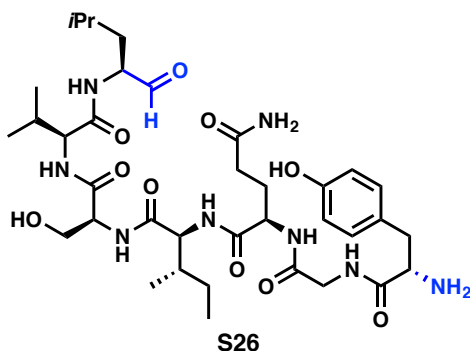

Amino aldehyde **S26** was prepared on a 40  $\mu\text{mol}$  scale according to general procedure 2a. Fmoc-Ile-CHO was loaded onto Rink TG resin and the peptide elongated under standard Fmoc-SPPS protocols. Following cleavage from the resin and ether precipitation, the crude peptide was purified by preparative reverse-phase HPLC (15% B for 5 min, then 15% B to 55% B over 25 min) to afford peptide **S26** (22.5 mg, 73% yield based on the original resin loading) as a white solid following lyophilization.

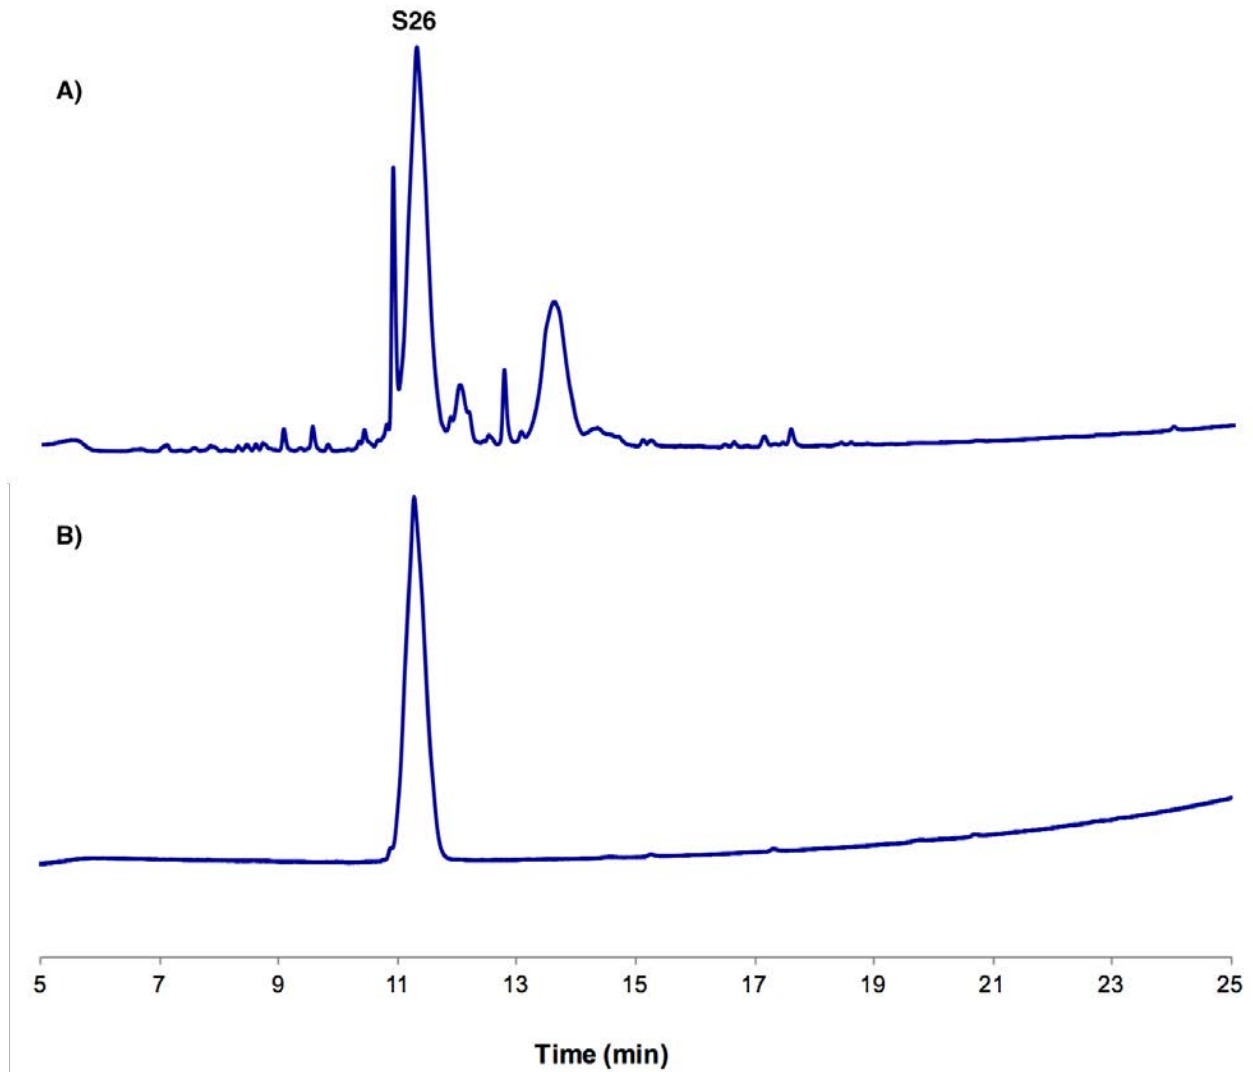

Purified peptide **S26** (Rt = 11.27 min, 5 to 100% B over 25 min,  $\lambda = 230$  nm).

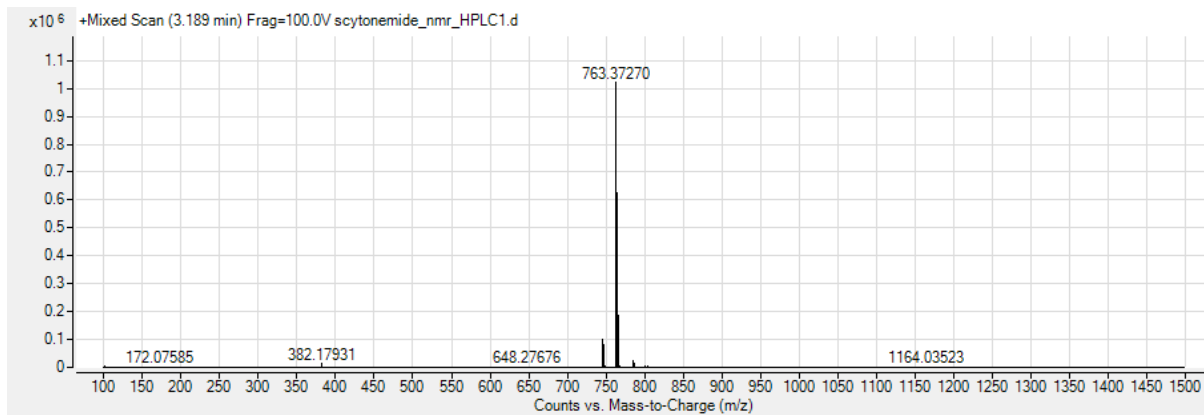

**LRMS (ESI-TOF):** calc'd for  $C_{33}H_{44}N_5O_{10}S$   $[M+H]^+$  763.43; found 763.37.

## Equilibration Studies

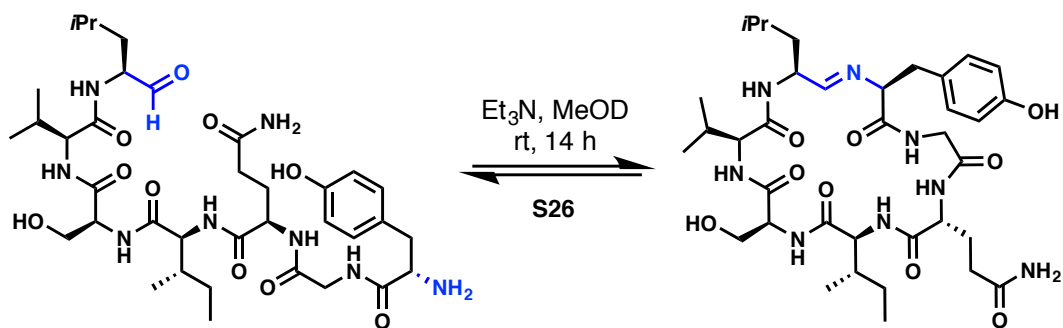

Aldehyde-imine equilibration of peptide **S26** (5.0 mg, 6.5  $\mu\text{mol}$ ) was induced by first dissolving the peptide in MeOD (1 mM).  $\text{Et}_3\text{N}$  (4.0 equiv. total) was then added, equivalent-wise (5 min between each addition), to the resulting solution. After the final addition, the solution was allowed to stir at room temperature for 14 hours. The compound was characterized without further purification.

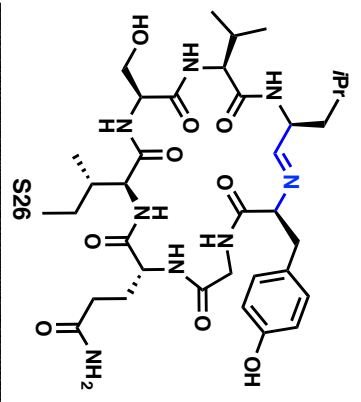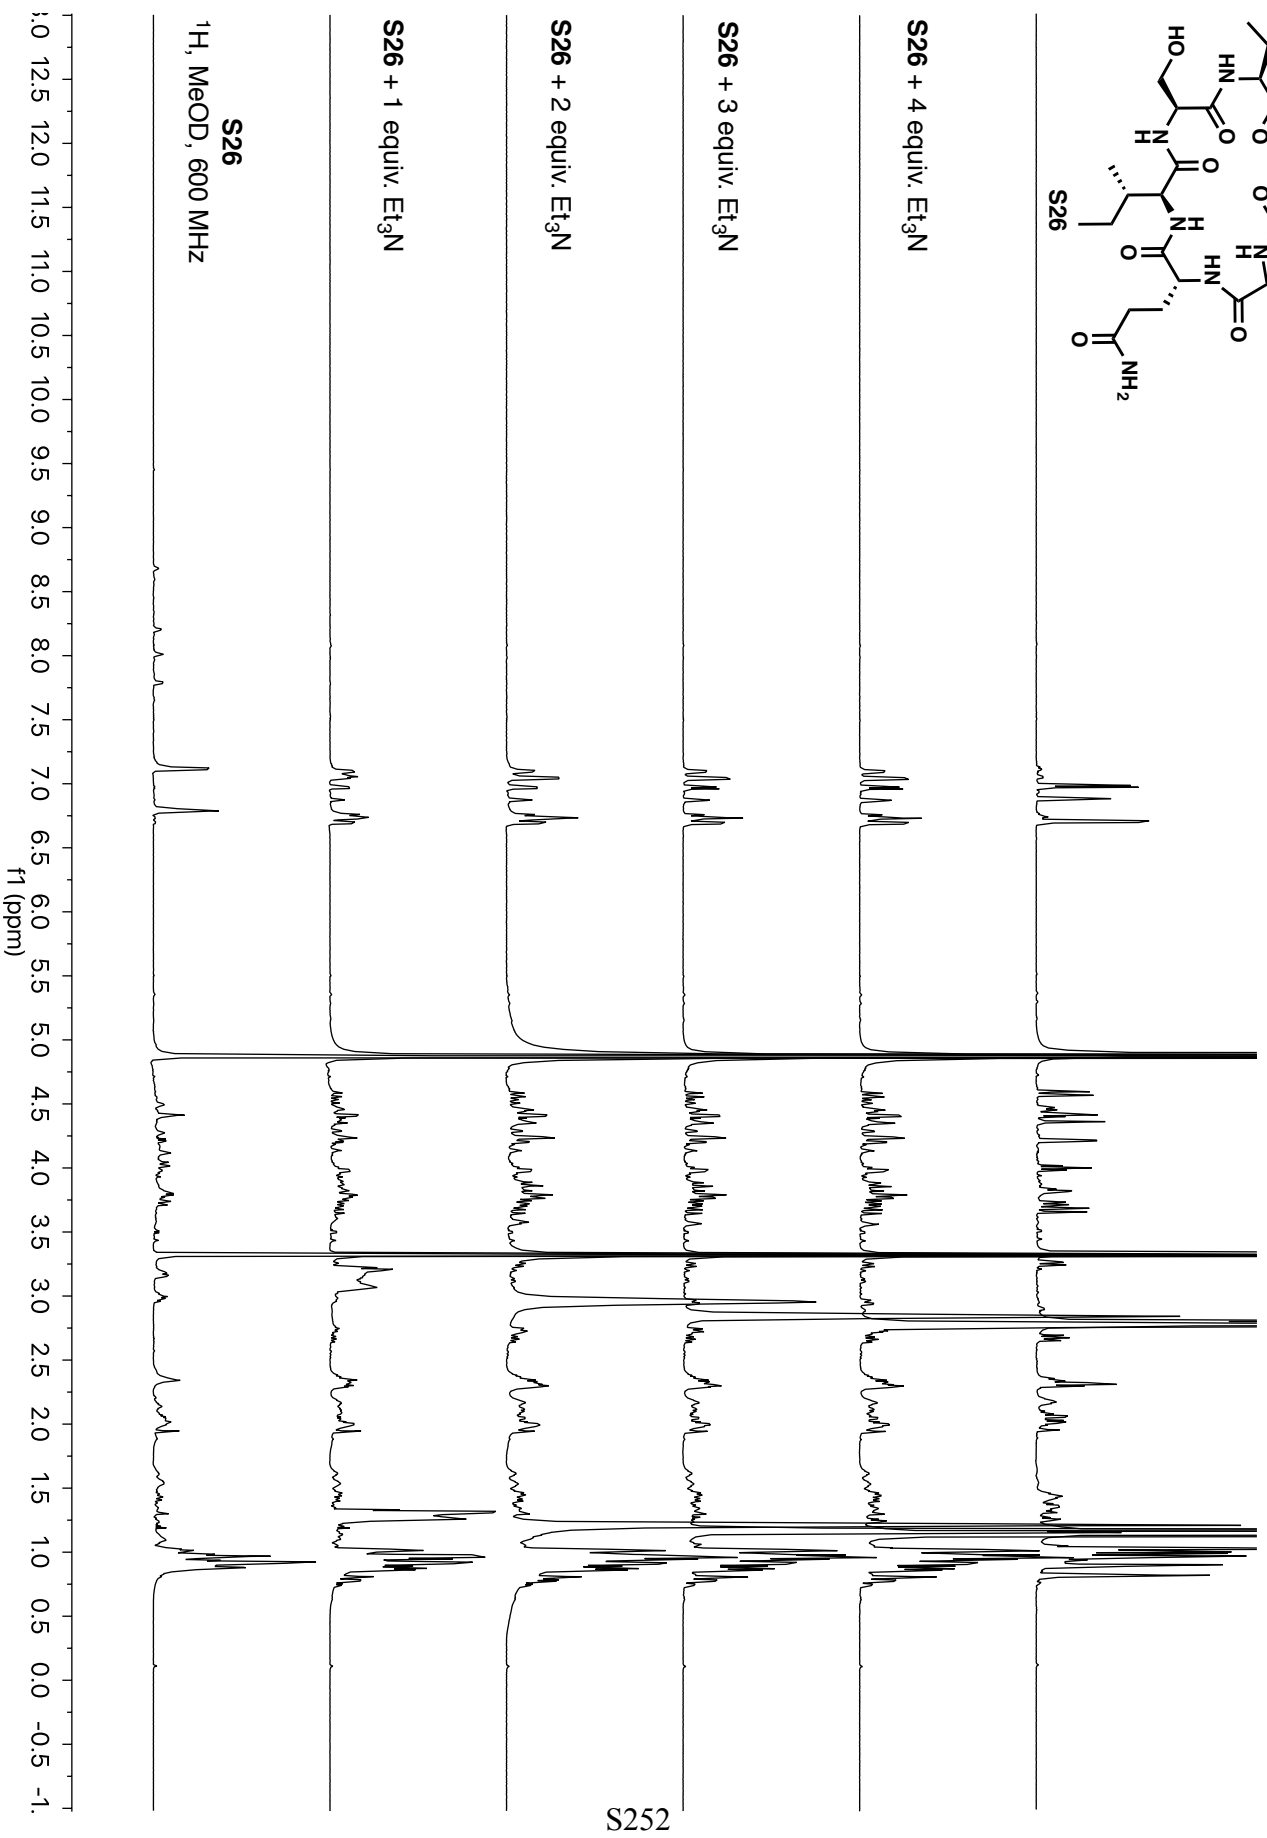

S252



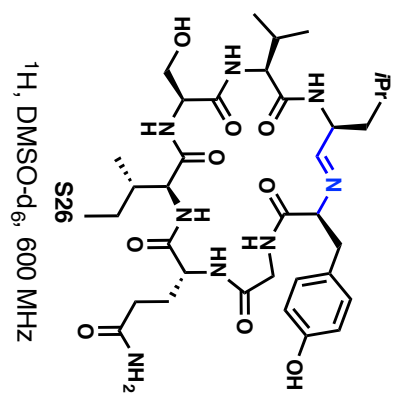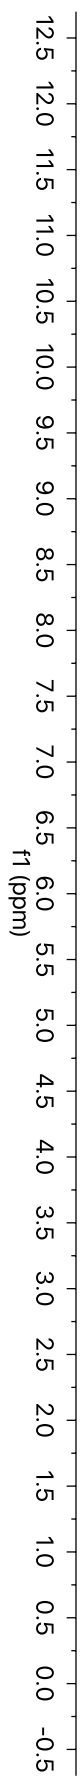

S26  
COSY, DMSO-d<sub>6</sub>, 600 MHz

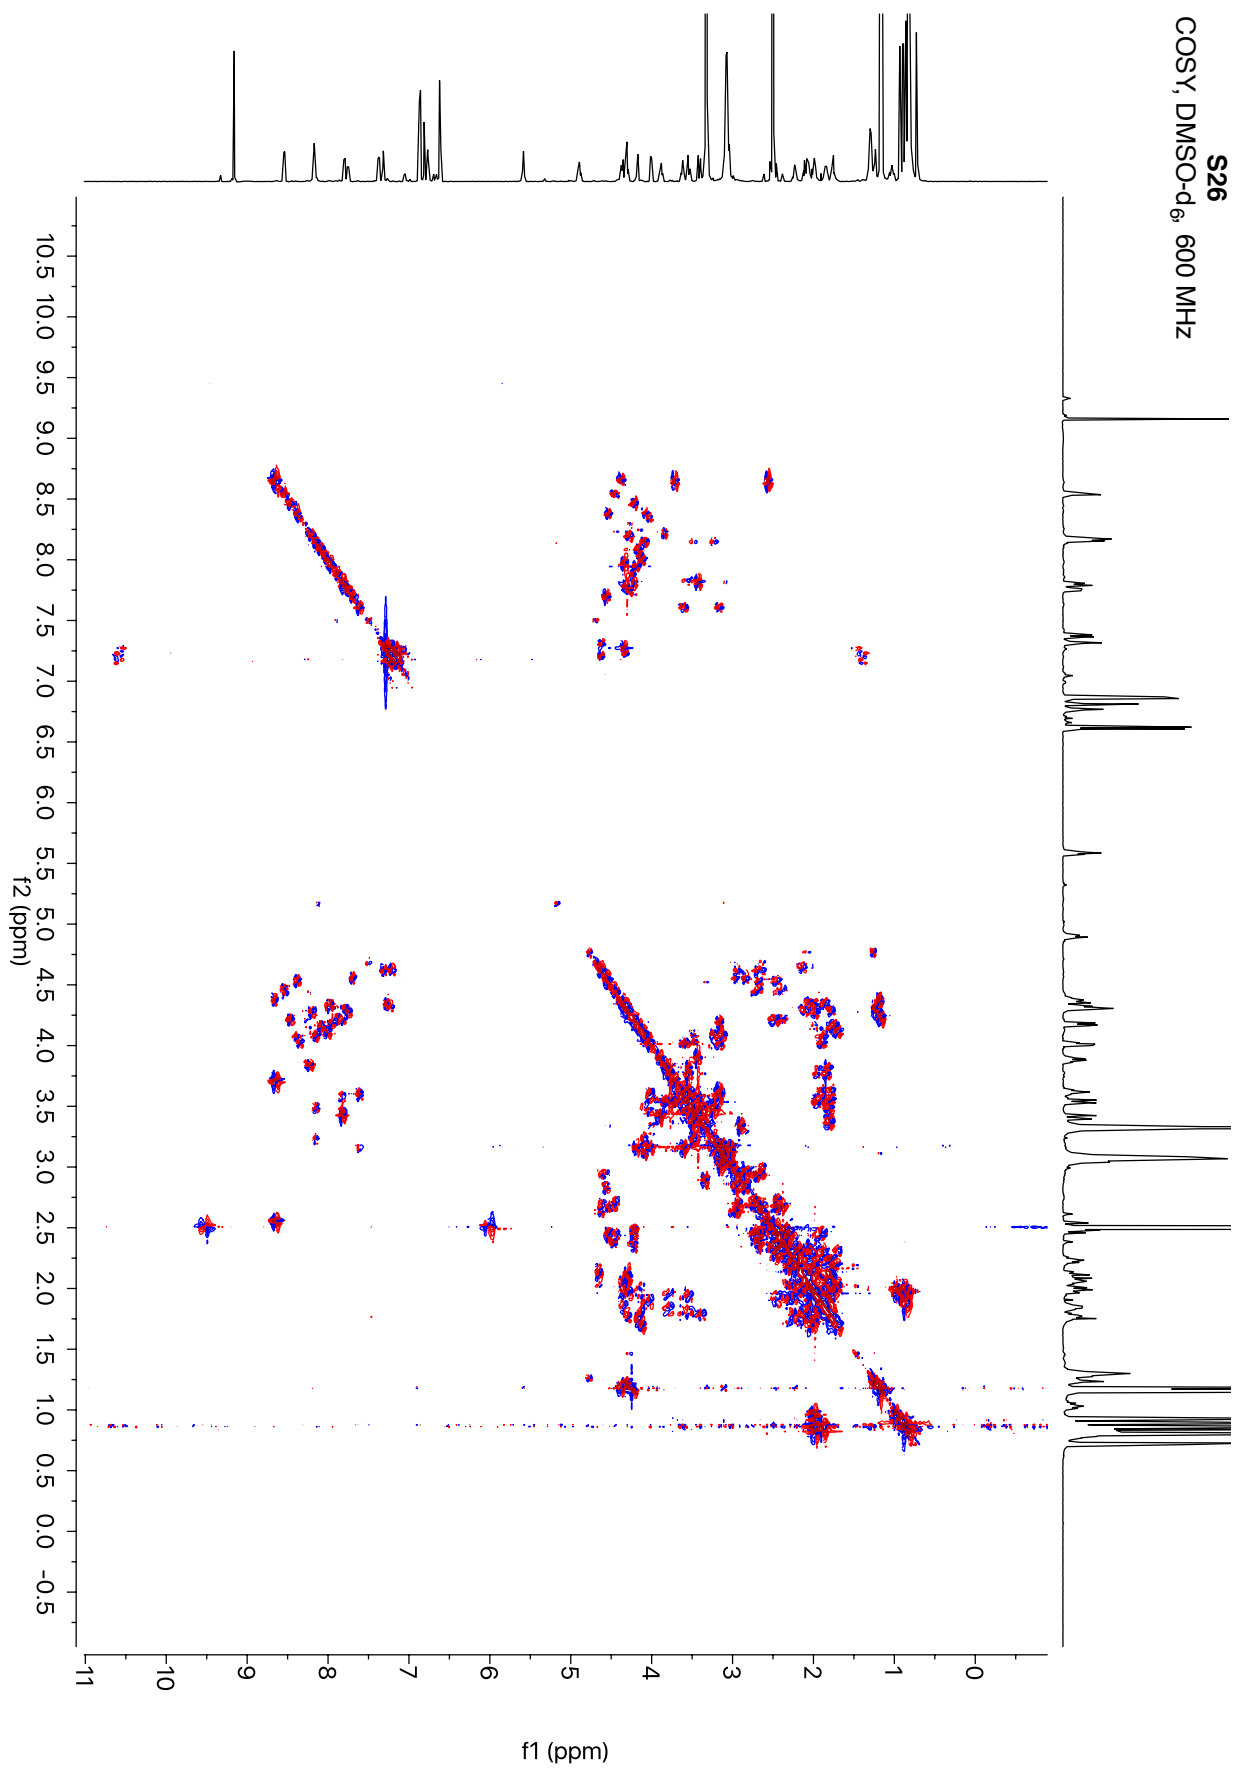

S254

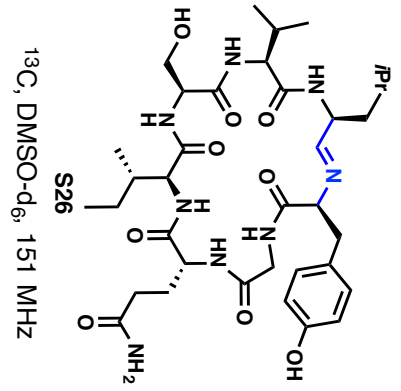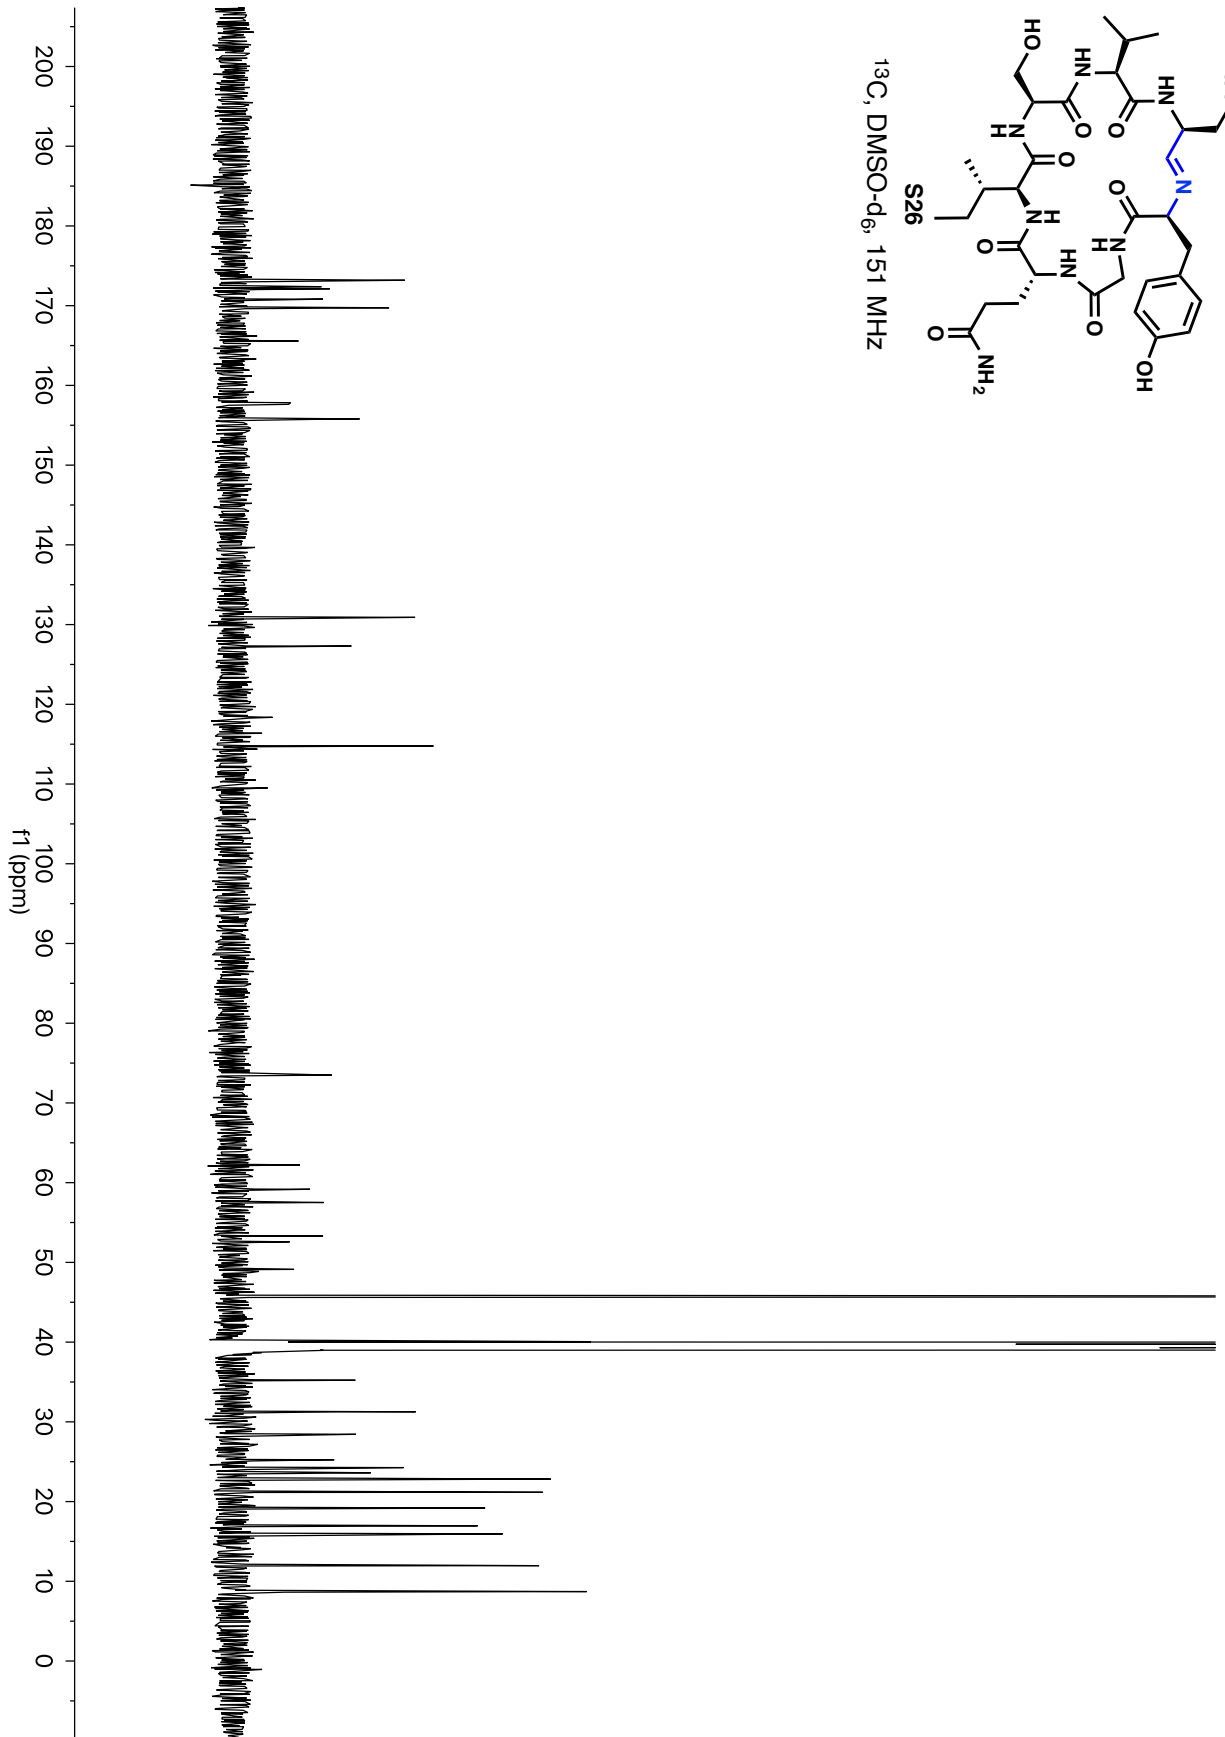

S26  
HMBC, DMSO-d<sub>6</sub>, 600 MHz

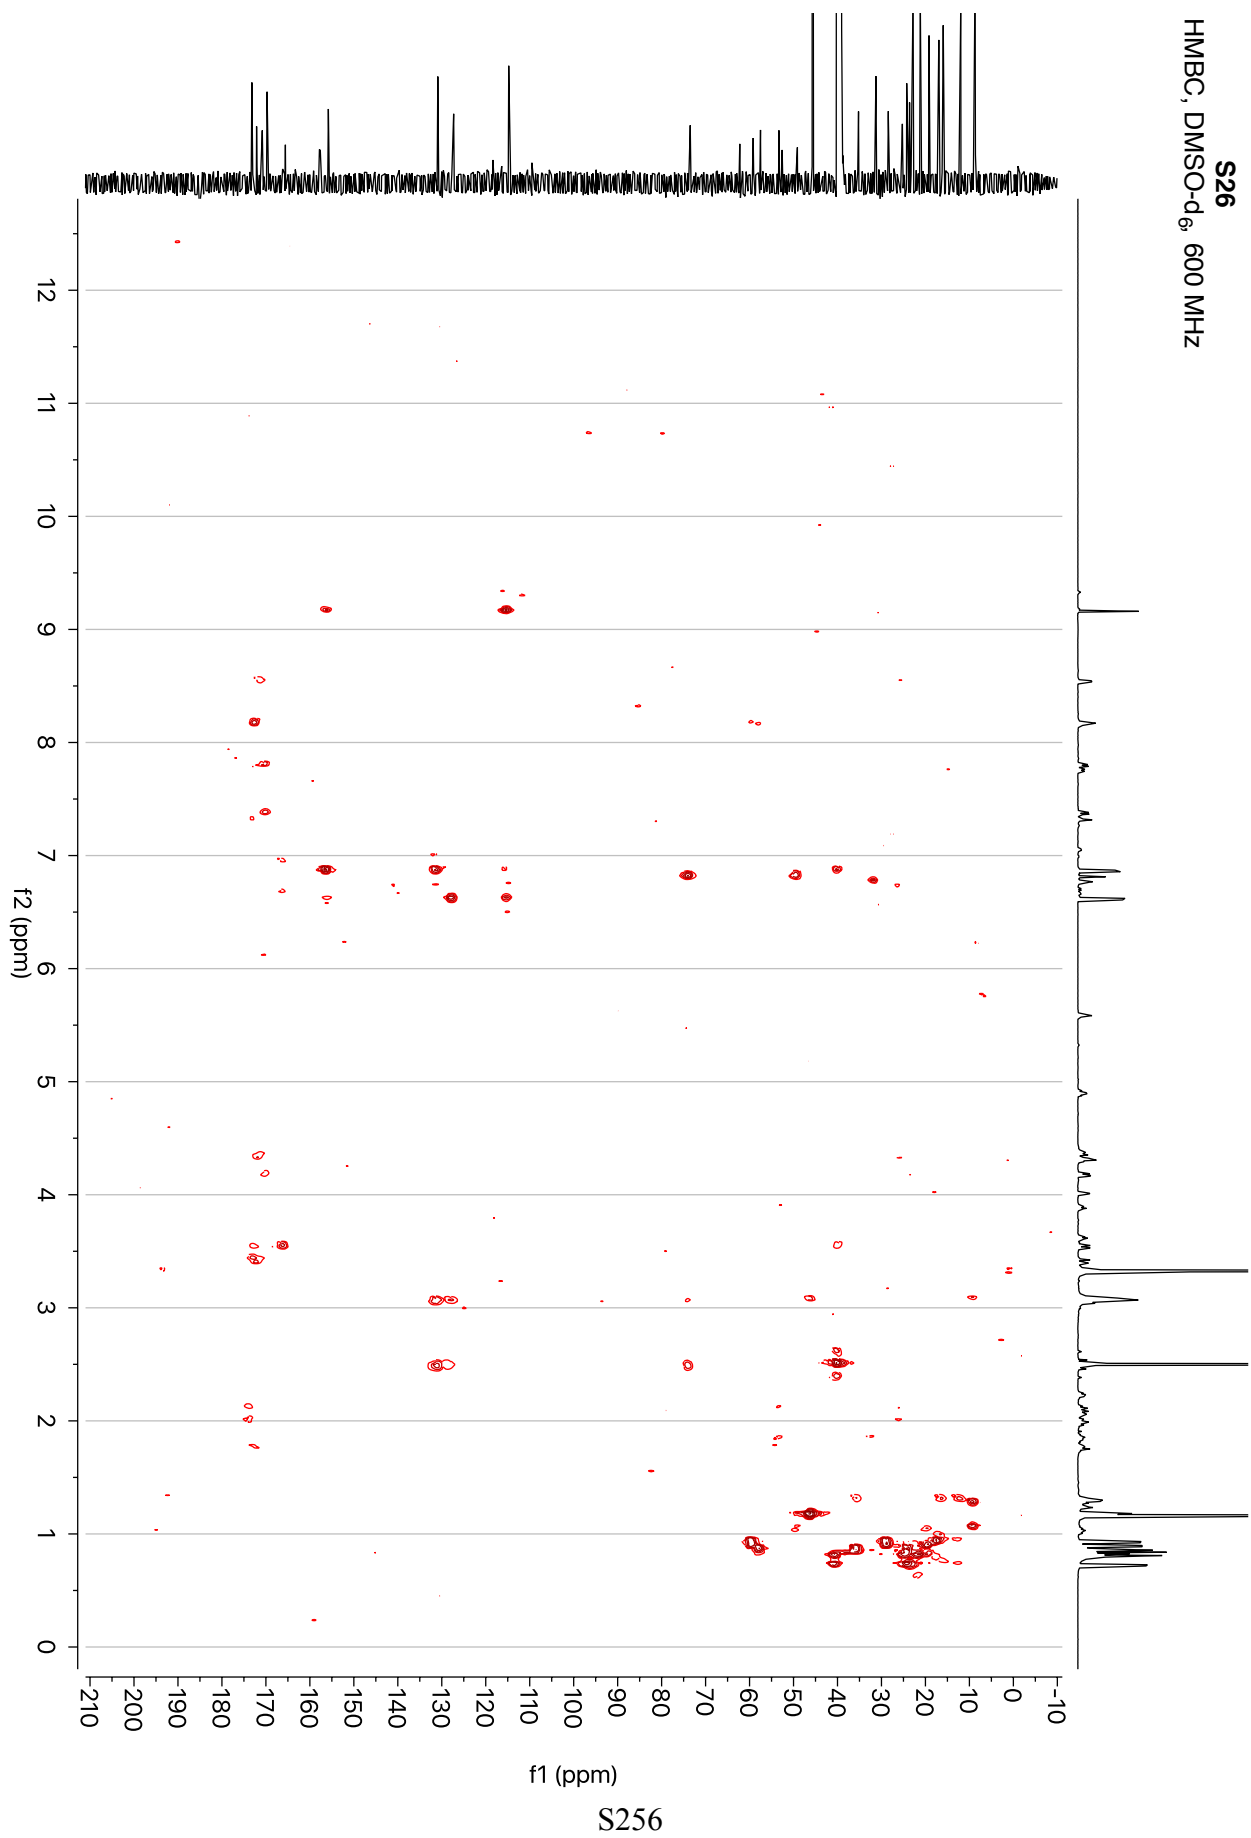

S256

S26  
ROESY, DMSO-d<sub>6</sub>, 600 MHz

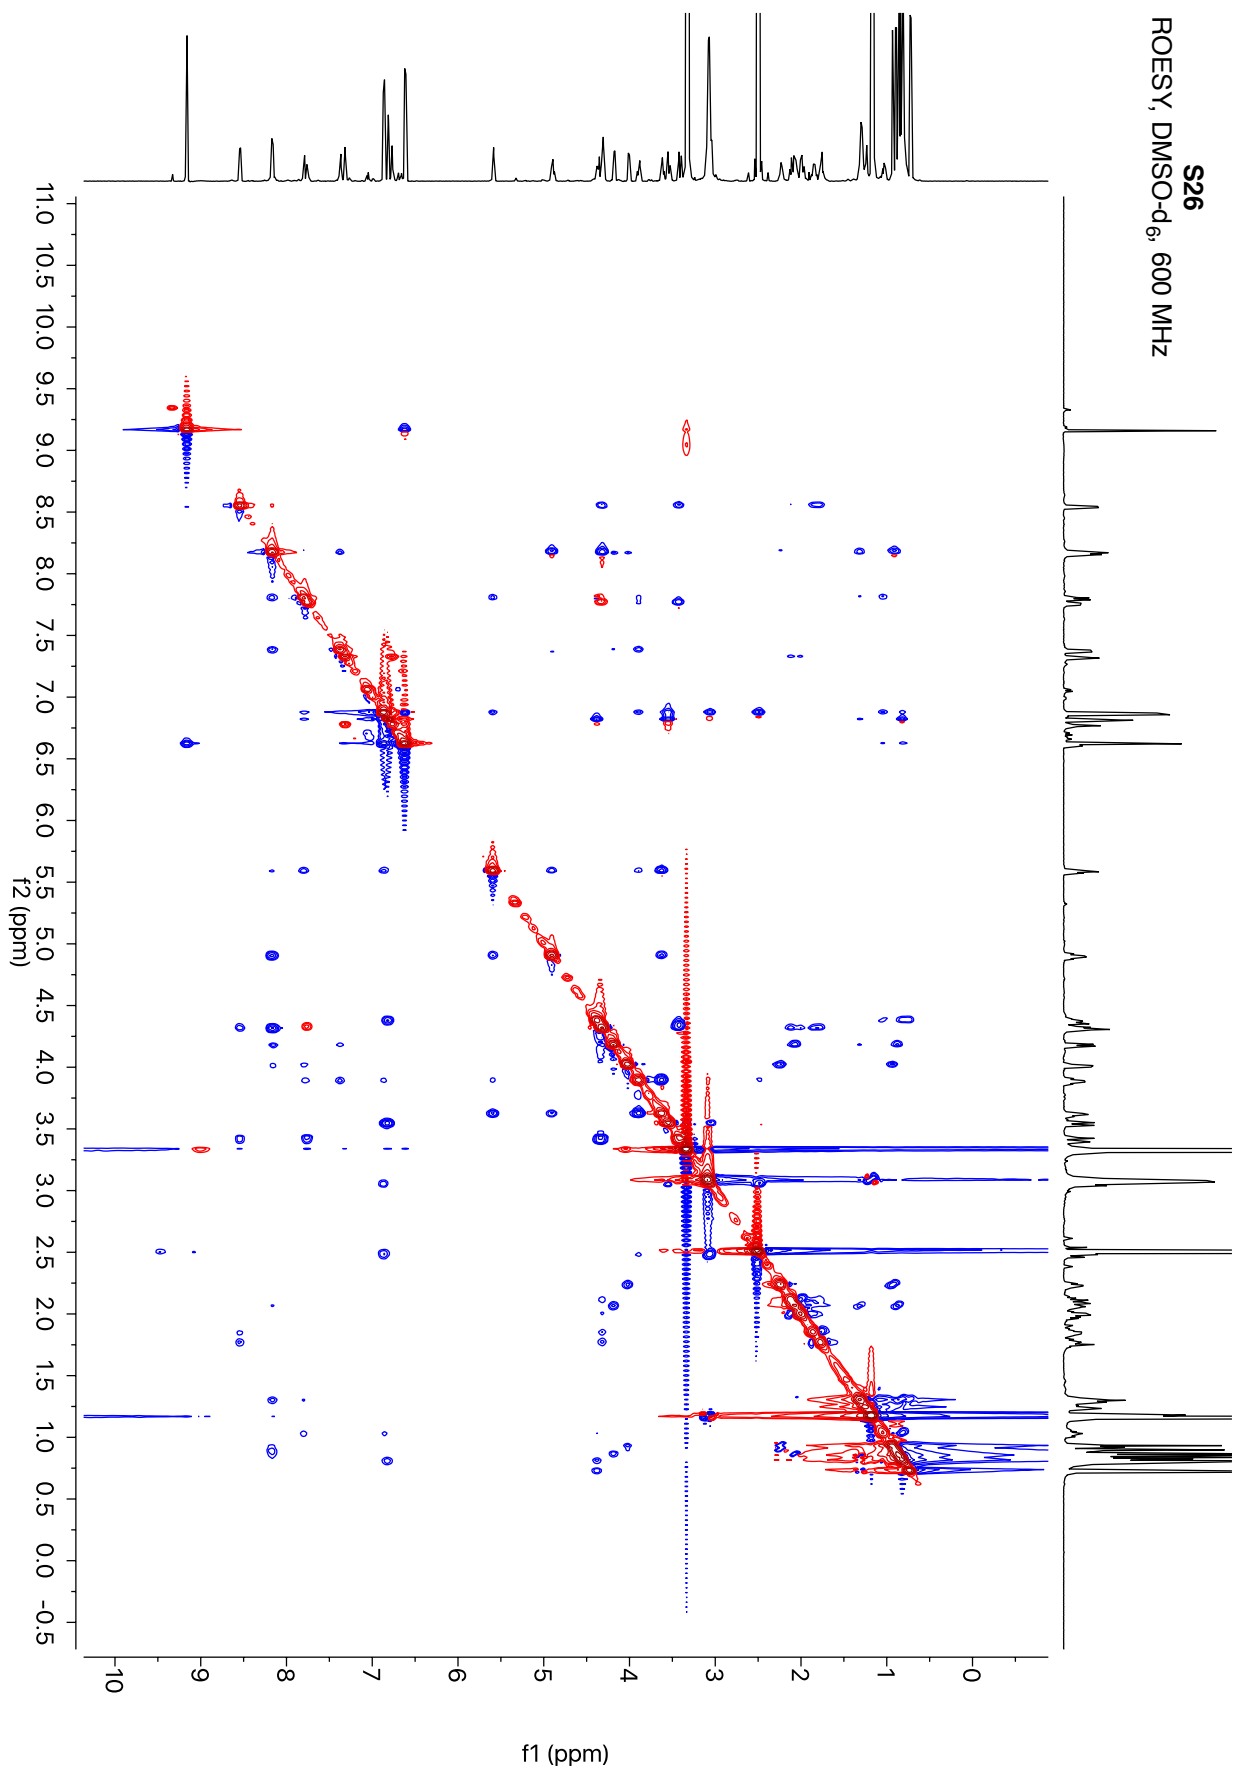

S257

## Peptide 37

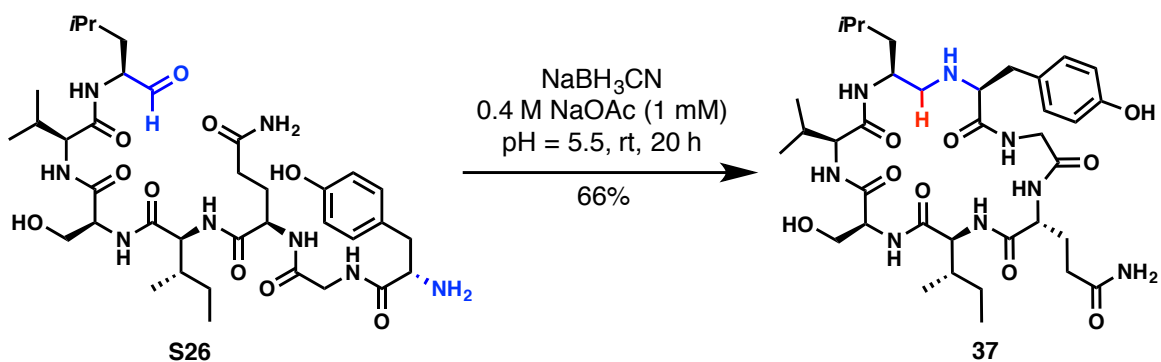

Peptide **37** was prepared according to general procedure 4 from linear amino aldehyde **S26** (5.7 mg, 7.5  $\mu\text{mol}$ ). At  $t = 20$  h, the reaction was purified by preparative reverse-phase HPLC (20% B for 5 min, 20% to 60% B over 30 min) to afford peptide macrocycle **37** (3.7 mg, 66% yield) as a white solid following lyophilization.

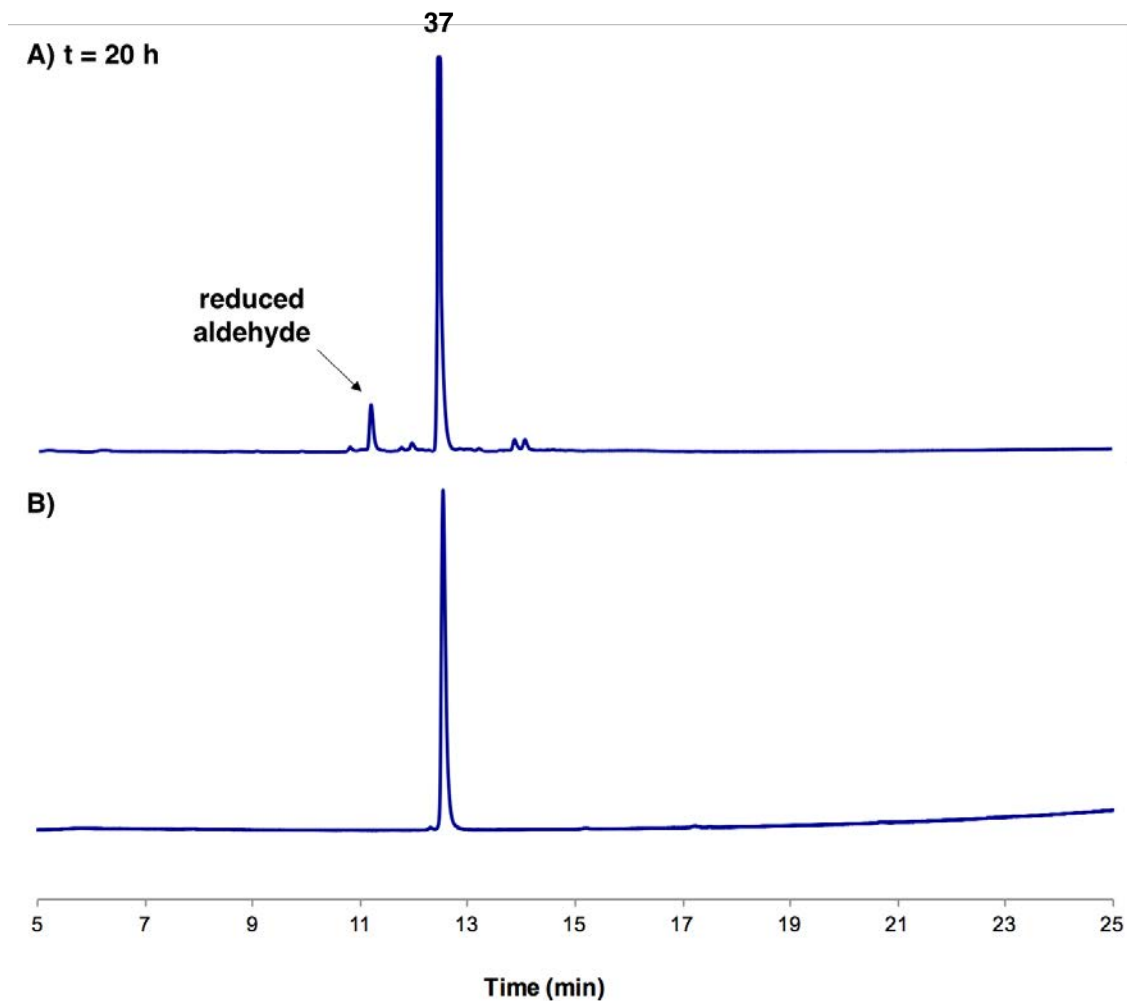

**A)** Crude analytical HPLC trace of the formation of **37** from amino aldehyde **S26** following reductive amination (5 to 100% B over 25 min,  $\lambda = 230$  nm). **B)** Purified peptide **37** ( $R_t = 12.54$  min, 5 to 100% B over 25 min,  $\lambda = 230$  nm).

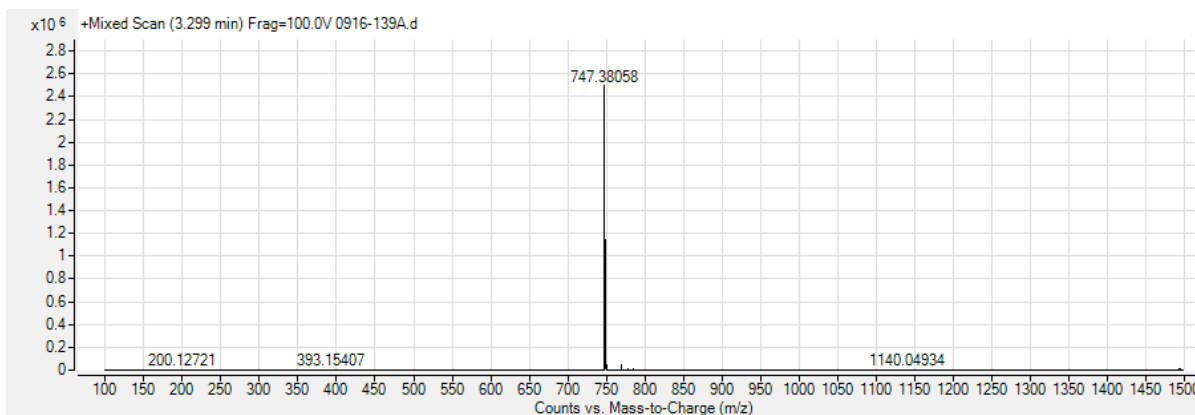

**LRMS (ESI-TOF):** calc'd for  $C_{36}H_{58}N_8O_9$   $[M+H]^+$  747.44; found 747.38.

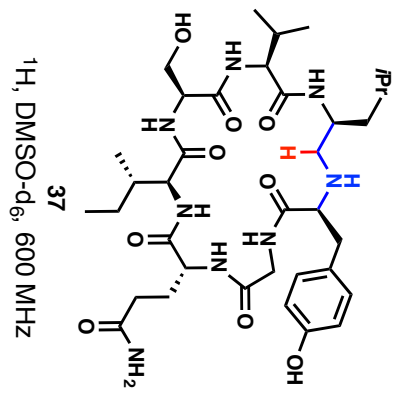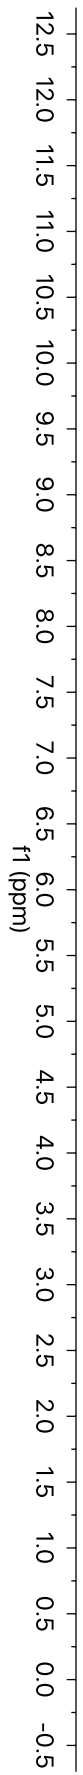



37  
COSY, DMSO-d<sub>6</sub>, 600 MHz

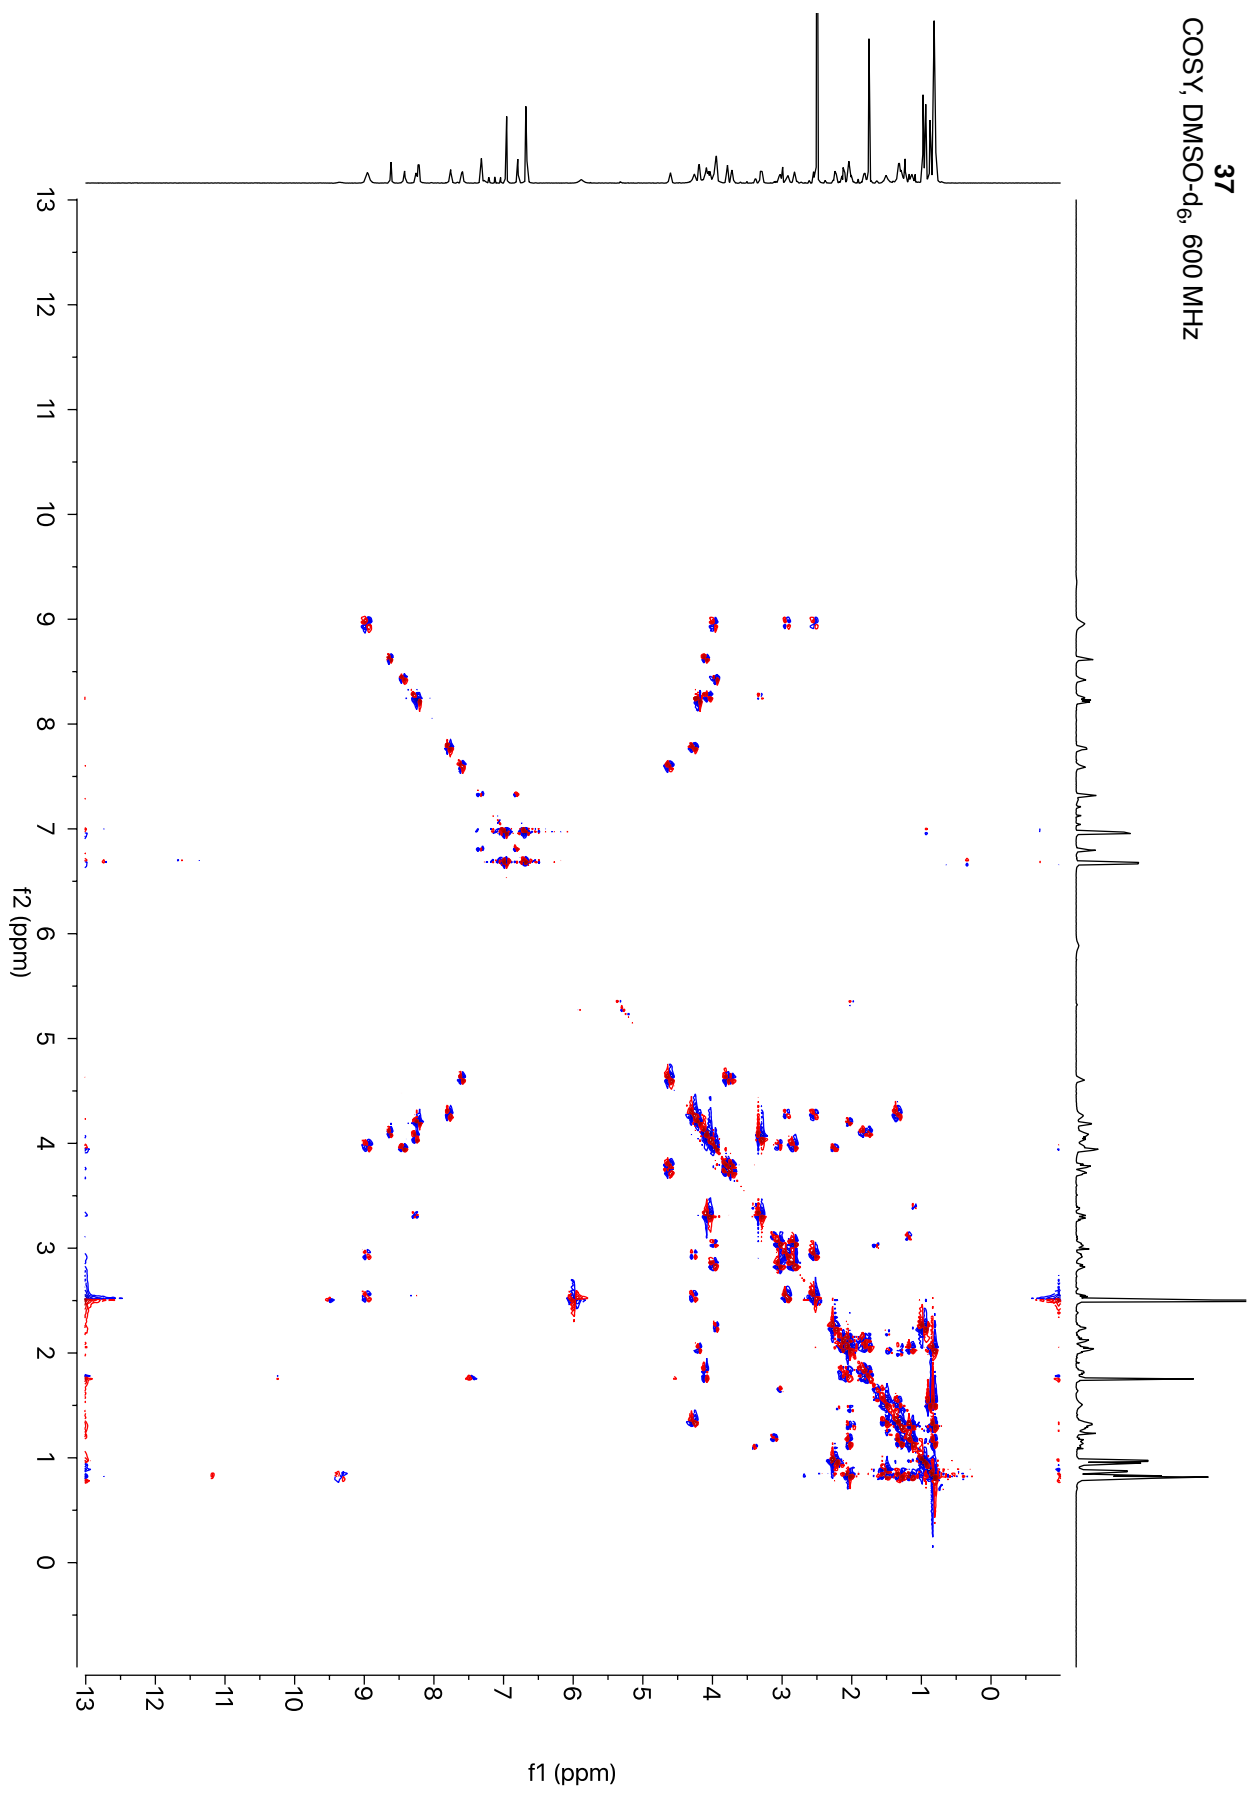

**Scytonemide Analogue Notes:**

- Attempts to purify the natural product proved fruitless, as the cyclic imine reverted to the linear form on removal of the Et<sub>3</sub>N.
- Qualitative analysis suggests that under most conditions explored herein, the equilibrium favors the open-chain peptide aldehyde; as such, competitive nucleophilic addition to the aldehyde dominated during attempts at a Strecker macrocyclization, resulting in almost exclusive formation of the corresponding linear cyanohydrin.

## Characterization Data for Koranimine Analogues

### Peptide S27

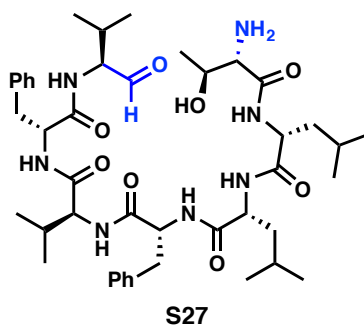

Amino aldehyde **S27** was prepared on a 50  $\mu\text{mol}$  scale according to general procedure 2a. Fmoc-Val-CHO was loaded onto Rink TG resin and the peptide elongated using standard Fmoc-SPPS. Following cleavage from the resin and ether precipitation, the crude peptide was purified by preparative reverse-phase HPLC (40% B for 5 min, then 40% B to 80% B over 30 min) to afford peptide **S27** (14.4 mg, 35% yield based on the original resin loading) as a white solid following lyophilization.

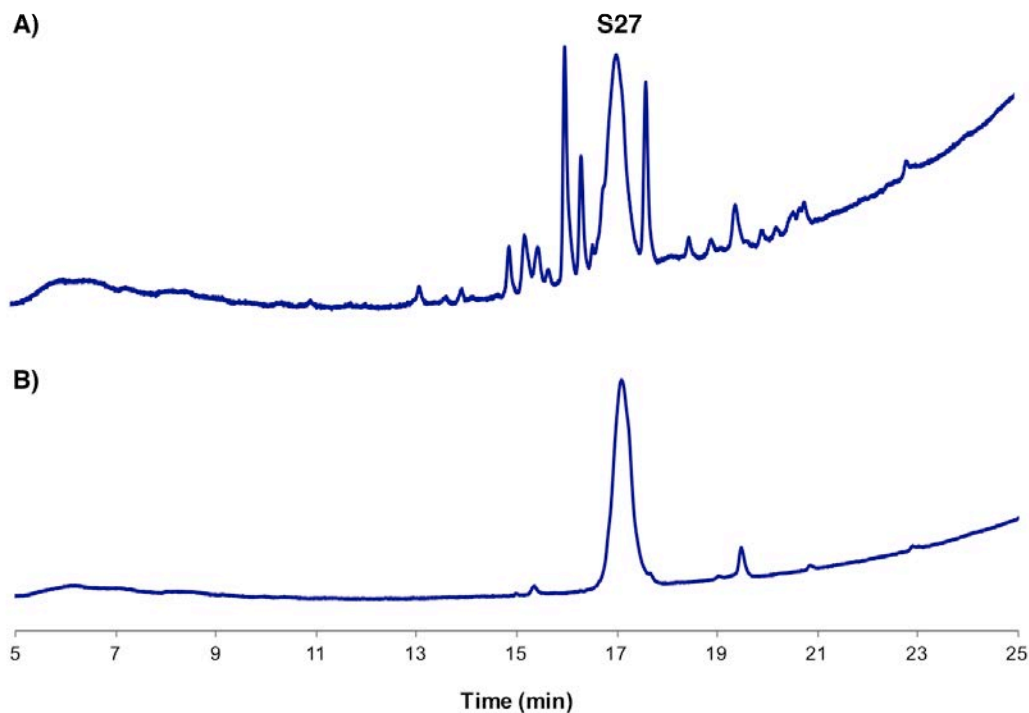

**A)** Crude analytical HPLC trace of amino aldehyde **S27** following Fmoc-SPPS and acidic cleavage from the resin (5 to 100% B over 25 min,  $\lambda = 230$  nm). **B)** Purified peptide **S27** (Rt = 16.9 min, 5 to 100% B over 25 min,  $\lambda = 230$  nm).

**A note on the structure of koranimine:** LC-MS analysis of purified **S27** indicated a mixture of aldehyde ( $[M+H]^+ = 822.51$ ) and spontaneous formation of a condensation product (imine/oxazolidine - see details below). NMR analysis in DMSO and upon treatment with  $\text{Et}_3\text{N}$  in MeOD (conditions which promoted the macrocyclization of Scytonemide A) revealed a complex product mixture in which the characteristic imine peak ( $\delta \approx 6.8$  ppm) was not observed. This is consistent with the isolation paper, in which characteristic imine signals were not observed in the  $^1\text{H}$  or  $^{13}\text{C}$  NMR spectra of isolated koranimine. A lack of sufficient material from the isolation also precluded detailed NMR analysis of the peptide.<sup>11</sup> We hypothesize that koranimine may also be present as an equilibrium mixture of diastereomeric cyclic oxazolidines formed intramolecularly upon attack of the N-terminal Thr  $\beta$ -alcohol onto the macrocyclic imine. This ring-chain tautomerism has been well-characterized for oxazolidines.<sup>12-14</sup> In the context of macrocyclic peptides, such an intramolecular cyclization event is reminiscent of the spontaneous thiazolidine formation in the natural product lugdunin.<sup>15</sup>  $^1\text{H}$ - $^{13}\text{C}$  HSQC NMR data (see below, in 99.9% DMSO- $d_6$ ) provides preliminary evidence of the formation of cyclic oxazolidine.

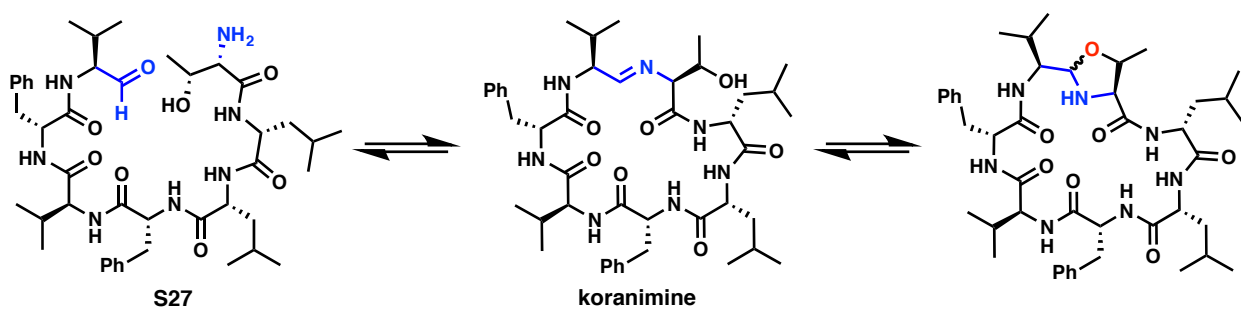

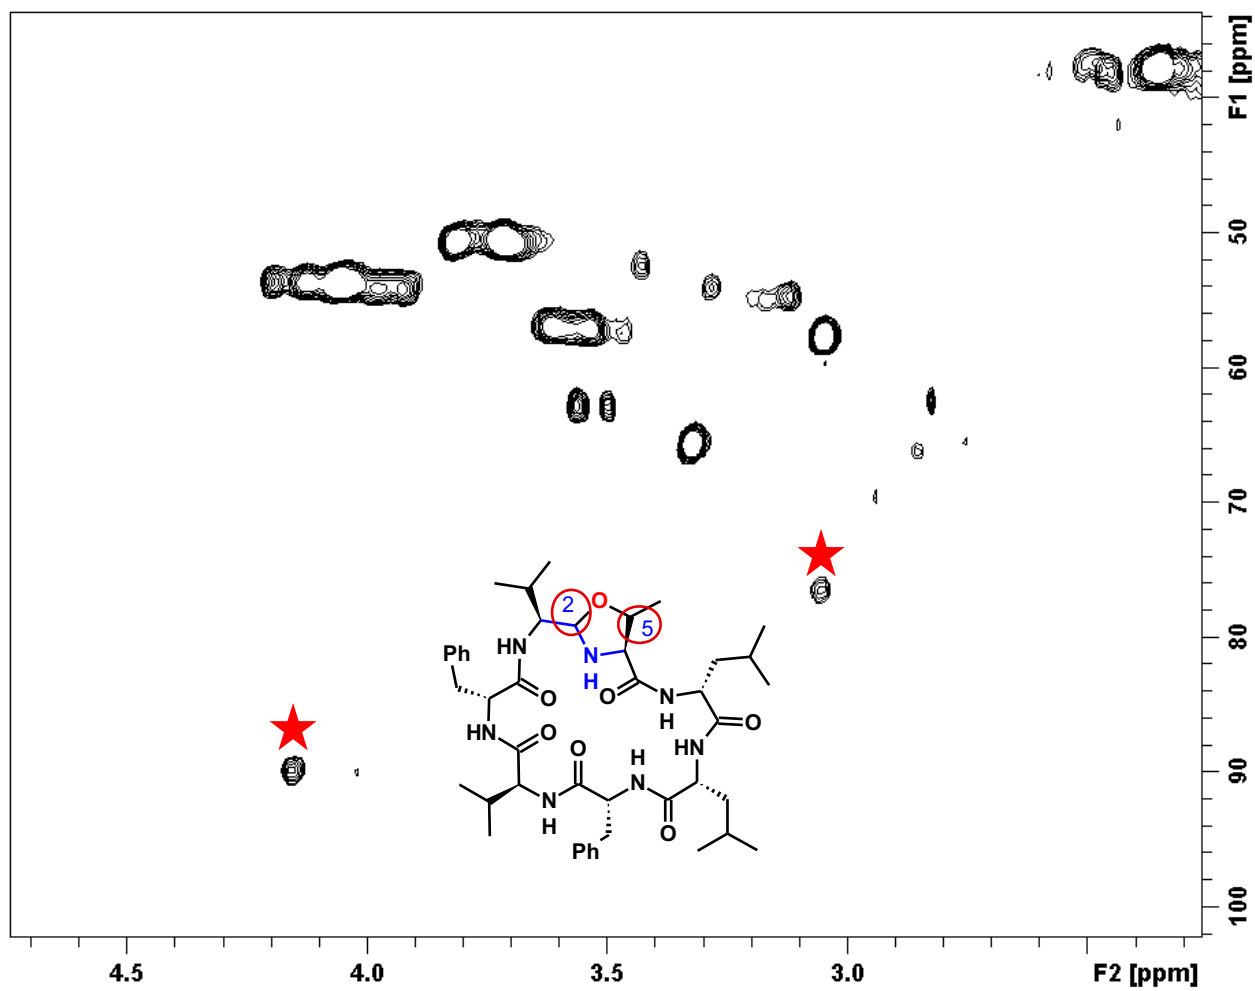

★ Predicted and observed C2 and C5 carbon chemical shifts of ca. 90 and 76 ppm, respectively.

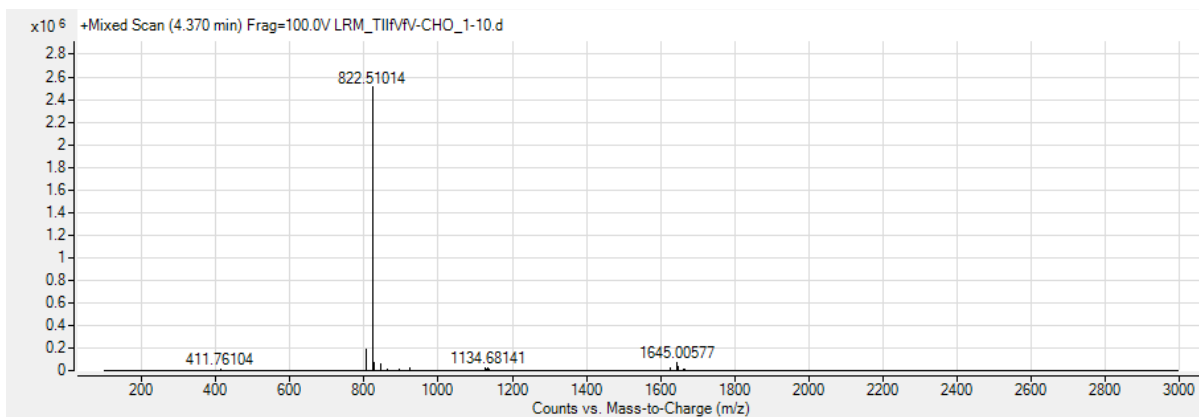

**LRMS (ESI-TOF):** calc'd for  $C_{44}H_{68}N_7O_8$   $[M+H]^+$  822.51; found 822.51 (aldehyde form).

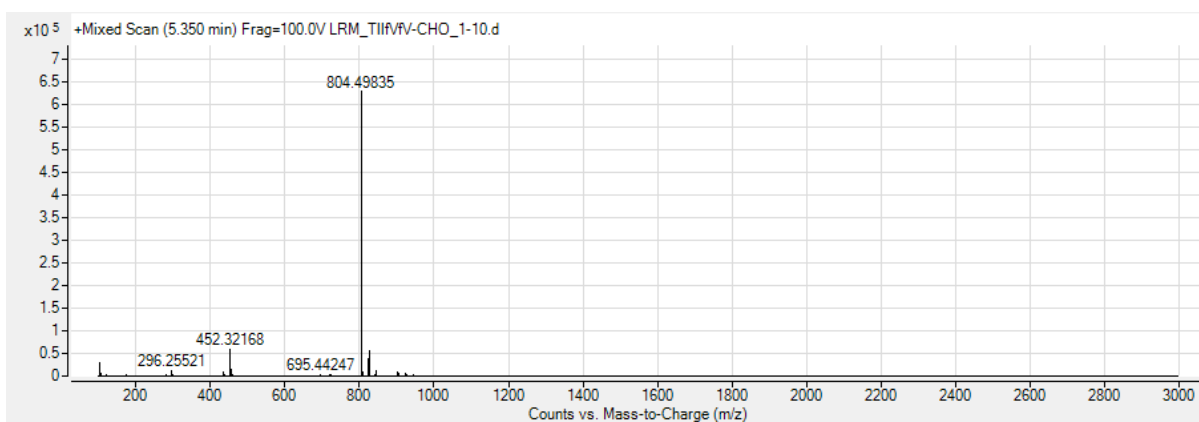

**LRMS (ESI-TOF):** calc'd for  $C_{44}H_{66}N_7O_7$   $[M+H]^+$  804.50; found 804.50 (imine/oxazolidine form).

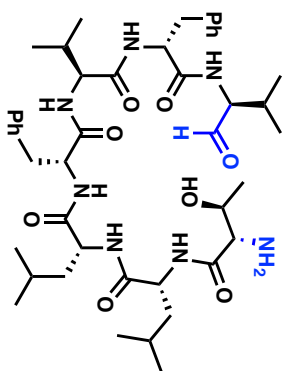

$^1\text{H}$ , DMSO- $d_6$ , 600 MHz

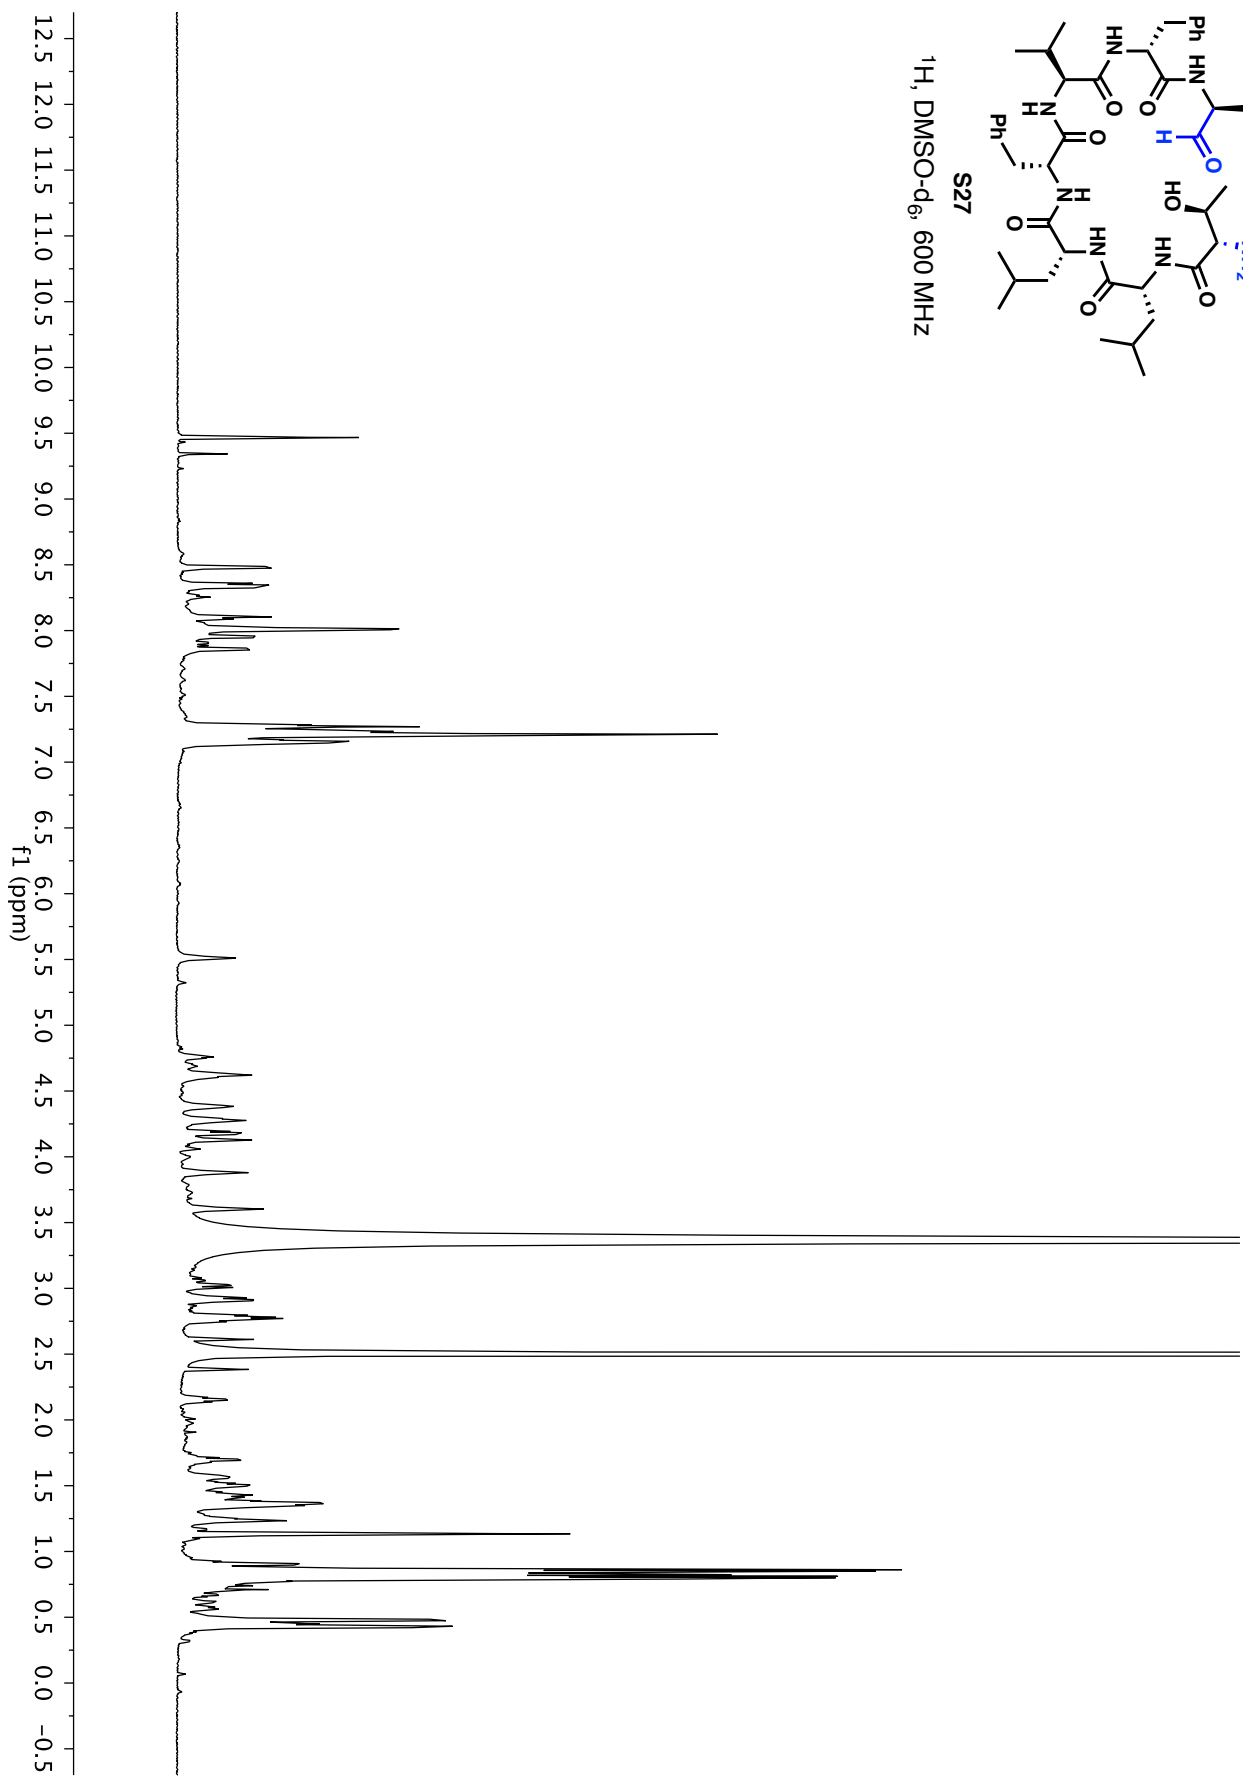

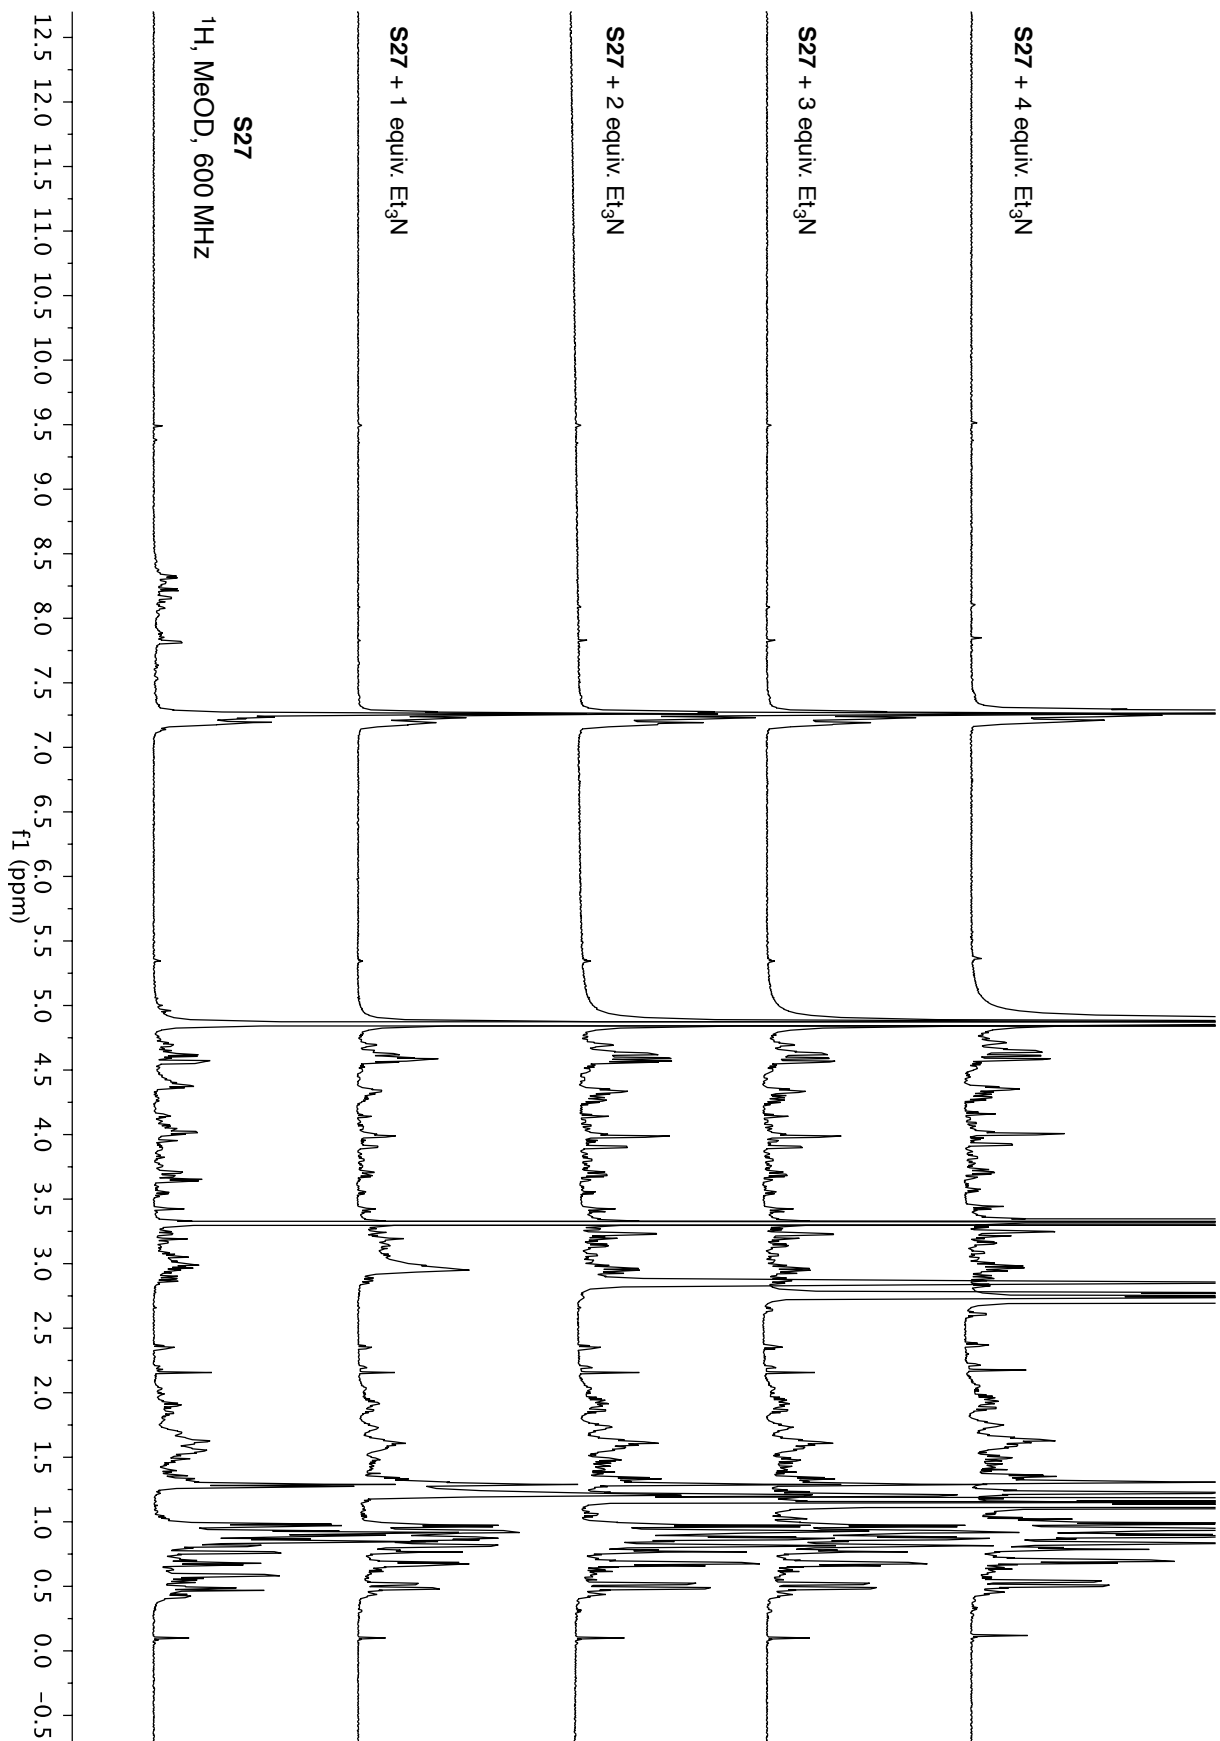



## Peptide 38

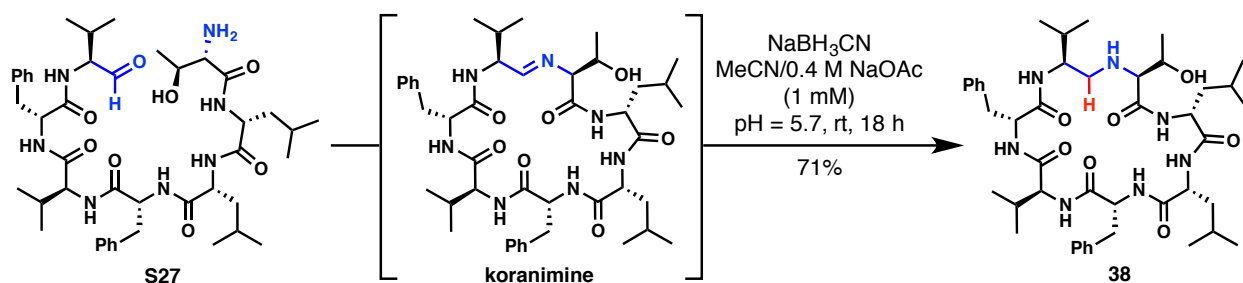

Peptide **38** was prepared according to general procedure 4 from linear amino aldehyde **S27** (7.0 mg, 9.8  $\mu$ mol). The peptide was solubilized in a 1:1 mixture of MeCN and 0.4 M NaOAc buffer (pH = 5.7). At  $t = 18$  h, the reaction was purified by preparative reverse-phase HPLC (45% B for 5 min, then 45% to 80% B over 30 min) to afford peptide macrocycle **38** (3.1 mg, 71% yield) as a white solid following lyophilization.

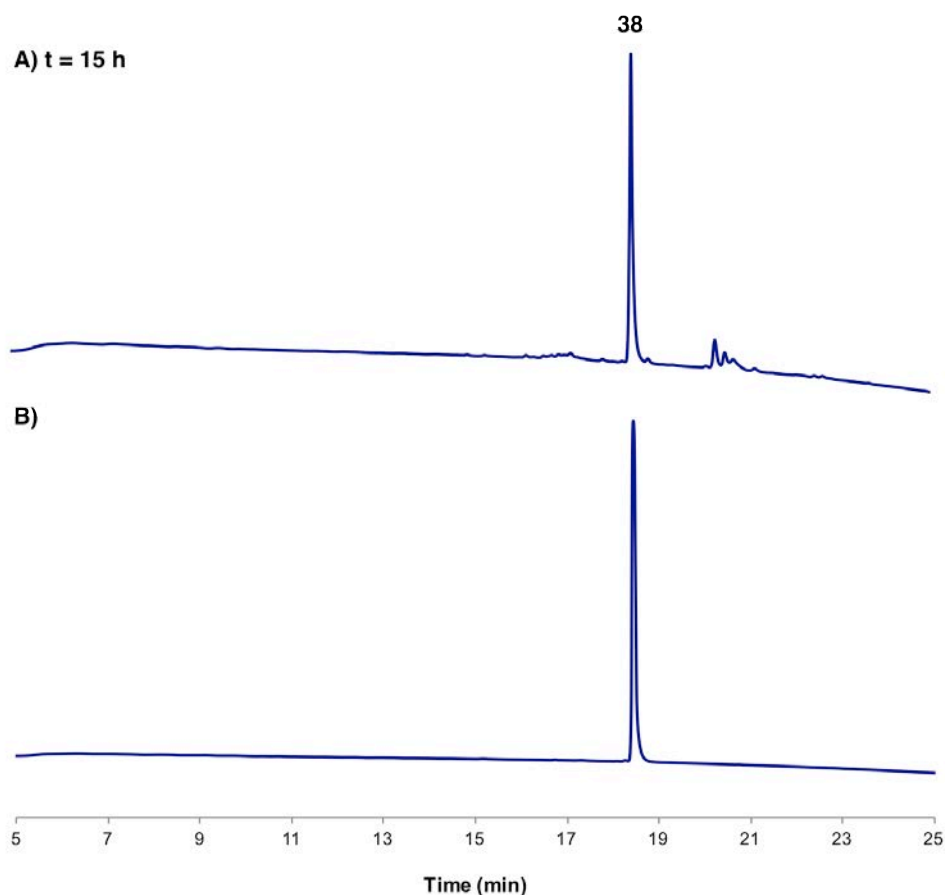

**A)** Crude analytical HPLC trace of the formation of **38** from amino aldehyde **S27** following reductive amination (5 to 100% B over 25 min,  $\lambda = 230$  nm). **B)** Purified peptide **38** (Rt = 18.4 min, 5 to 100% B over 25 min,  $\lambda = 230$  nm).

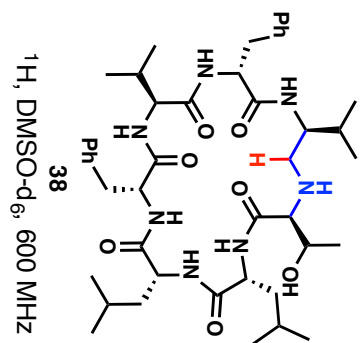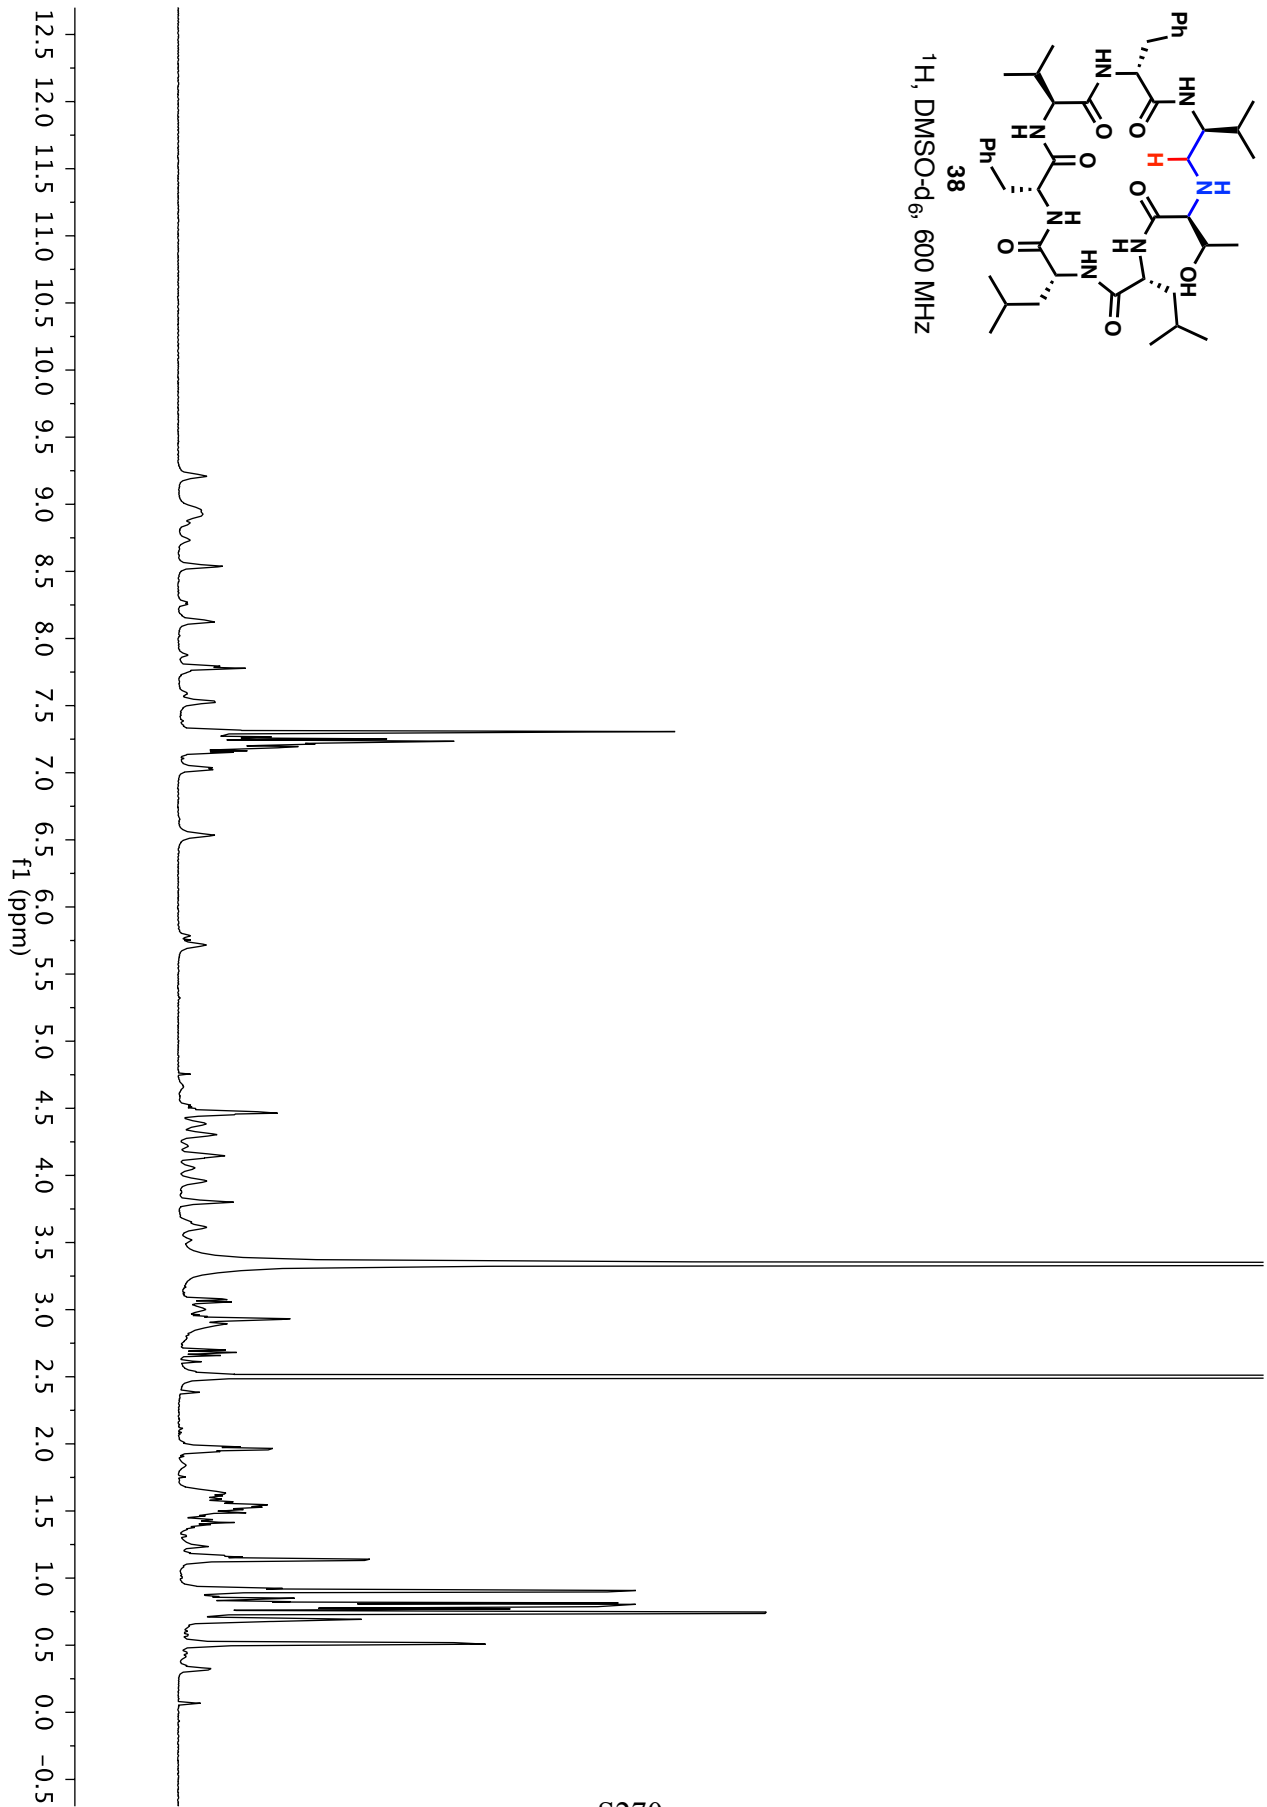



38  
COSY, DMSO-d<sub>6</sub>, 600 MHz

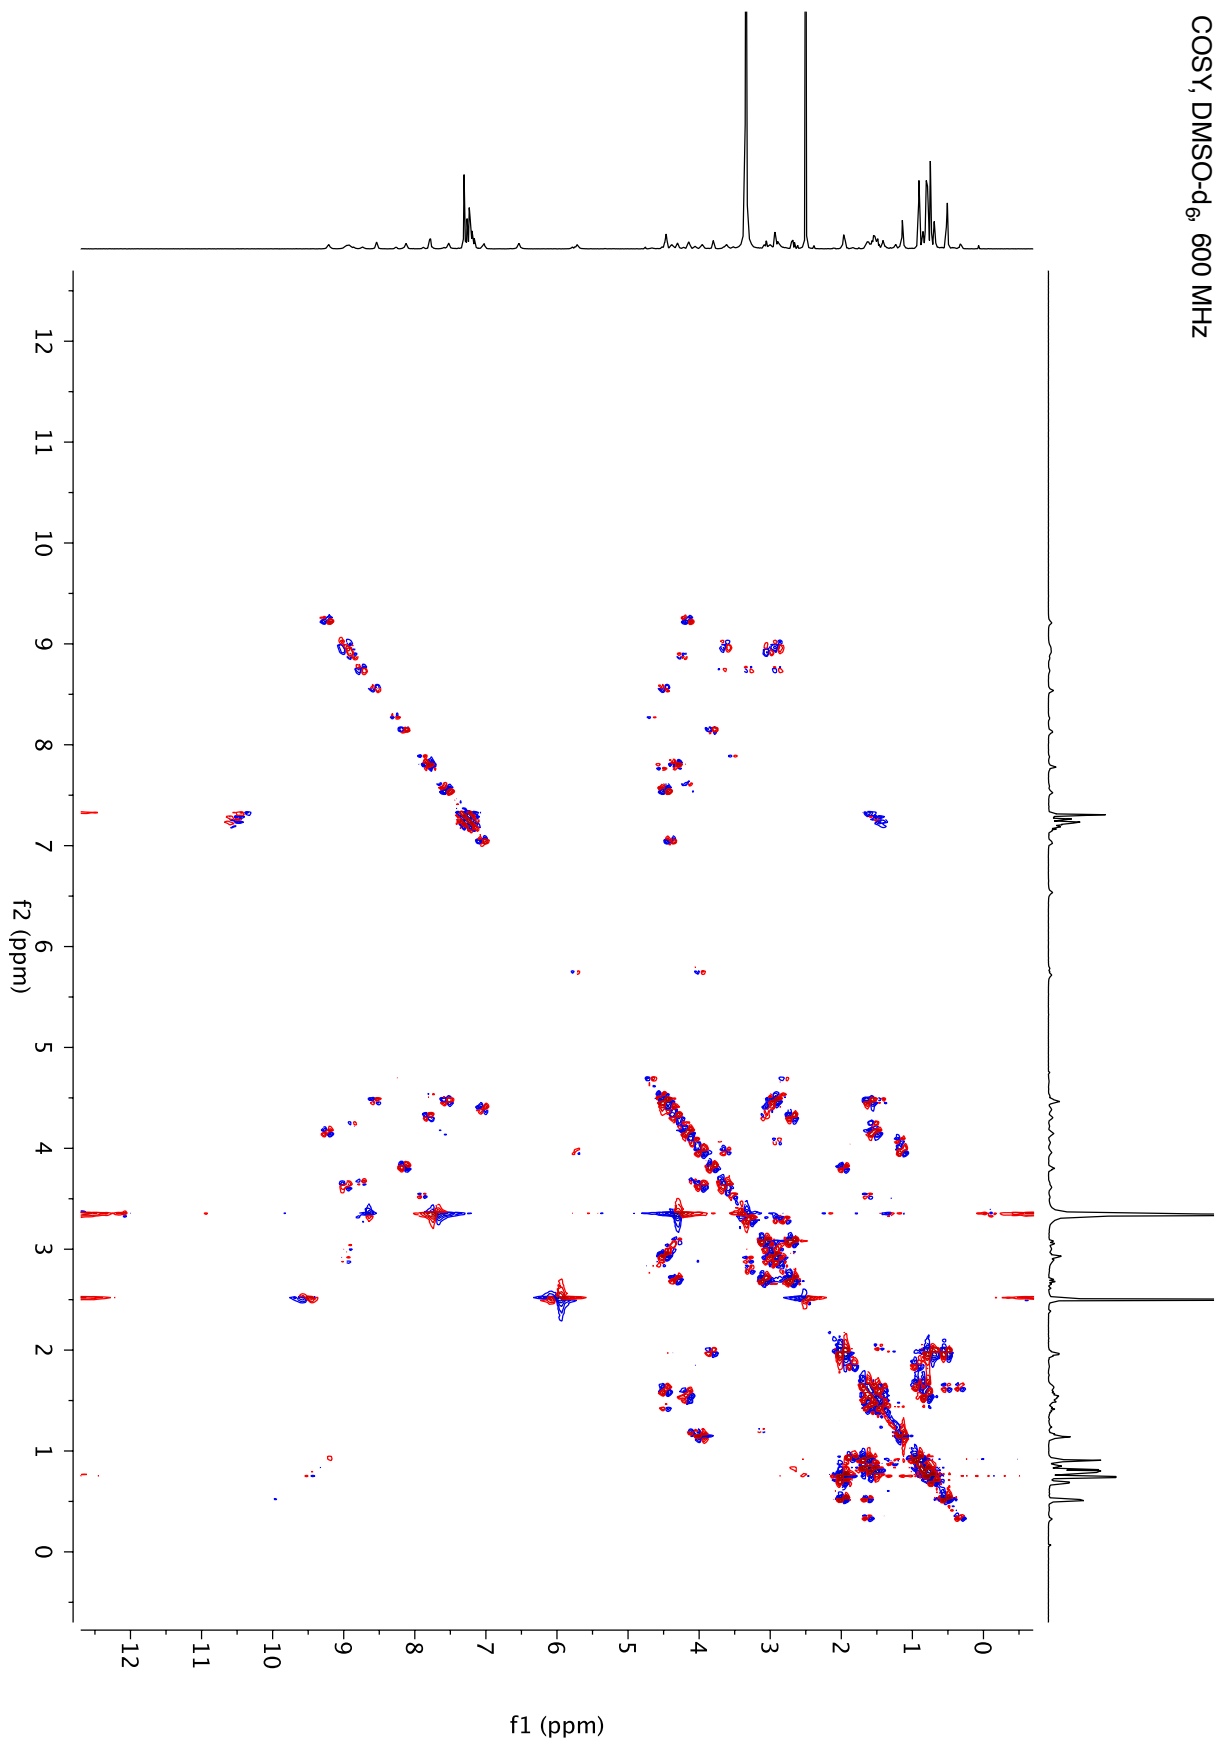

## Characterization Data for Lugdunin Analogues

### Peptide 39

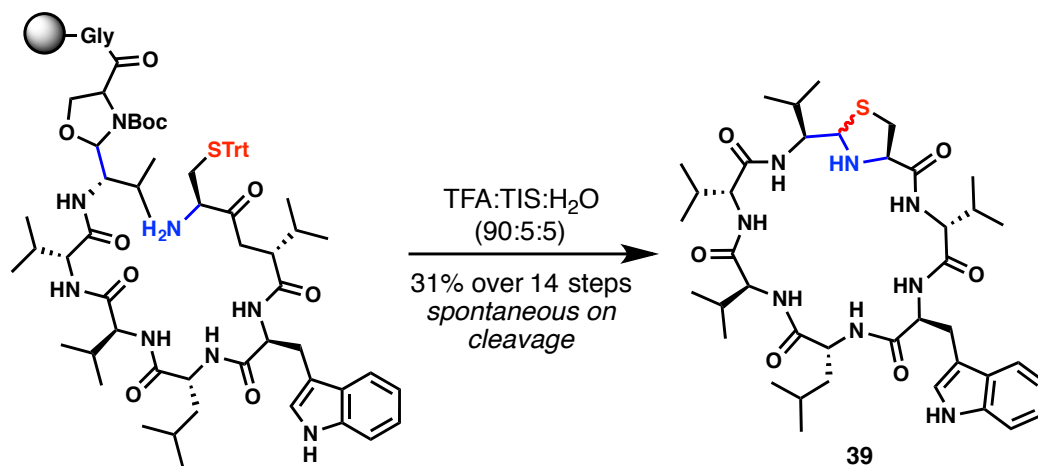

Amino aldehyde **39** was prepared on a 14.5  $\mu\text{mol}$  scale according to general procedure 2a. Fmoc-Leu-CHO was loaded onto Rink TG resin and the peptide elongated using standard Fmoc-SPPS protocols. Following cleavage from the resin and ether precipitation, the crude peptide was purified by preparative reverse-phase HPLC (50% B for 5 min, then 50% B to 100% B over 30 min) to afford lugdunin **39** (3.4 mg, 31% yield based on the original resin loading) as a mixture of interconverting diastereomers and as a white solid following lyophilization.

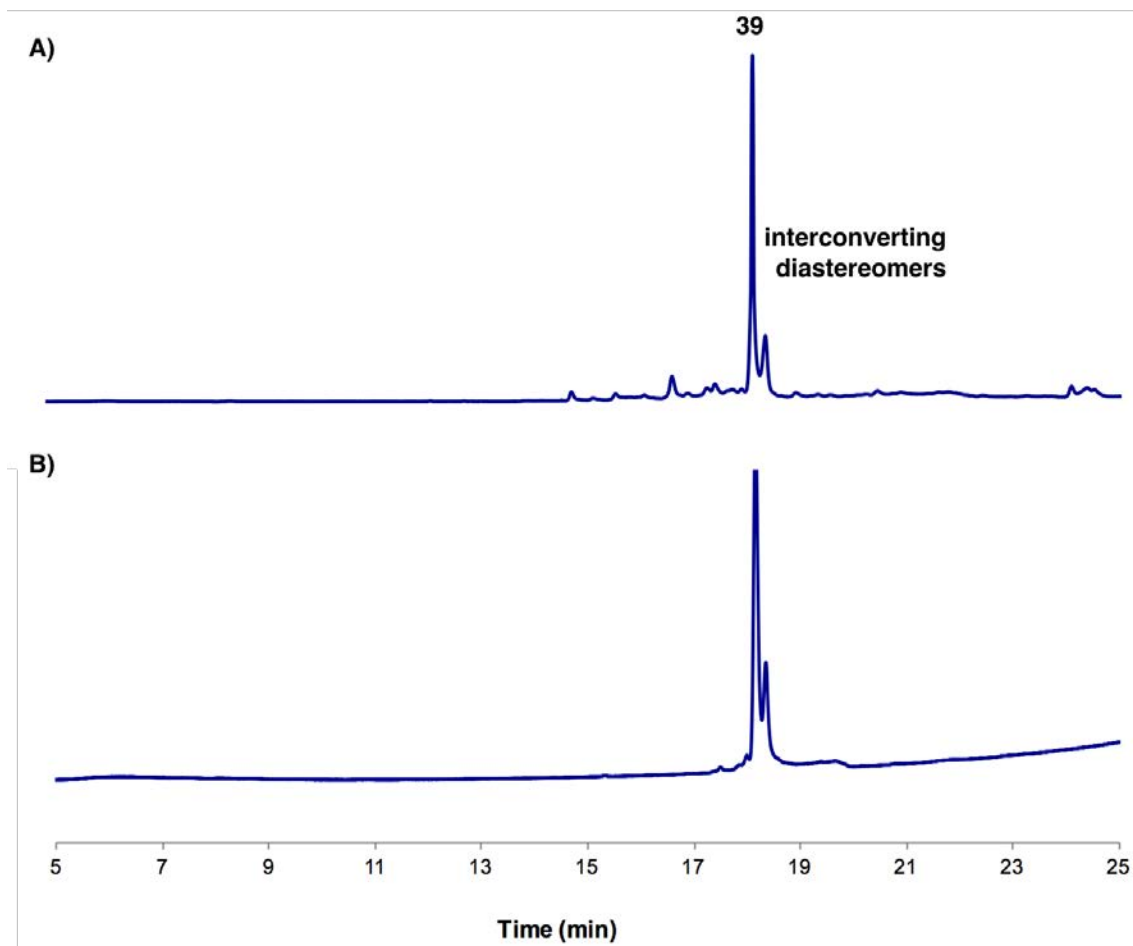

**A)** Crude analytical HPLC trace of the formation of **39** following cleavage from resin (5 to 100% B over 25 min,  $\lambda = 230$  nm). **B)** Purified peptide **39** (Rt = 18.2, 18.4 min, 5 to 100% B over 25 min,  $\lambda = 230$  nm).

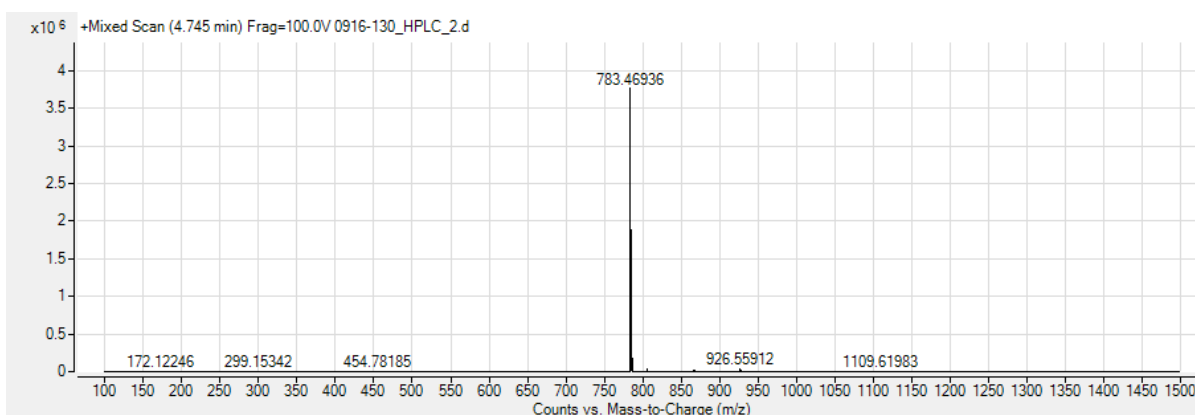

**LRMS (ESI-TOF):** calc'd for  $C_{40}H_{62}N_8O_6S$   $[M+H]^+$  783.46; found 783.46.

The recorded NMR spectra for synthetic lugdunin (**39**) are in agreement with literature data.<sup>15</sup>

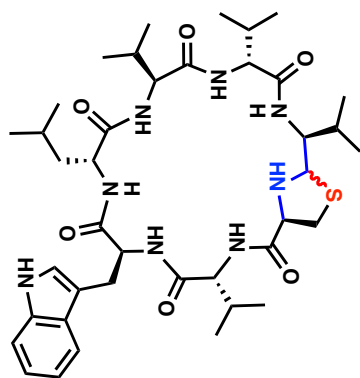

$^1\text{H}$ , DMSO- $d_6$ , 600 MHz

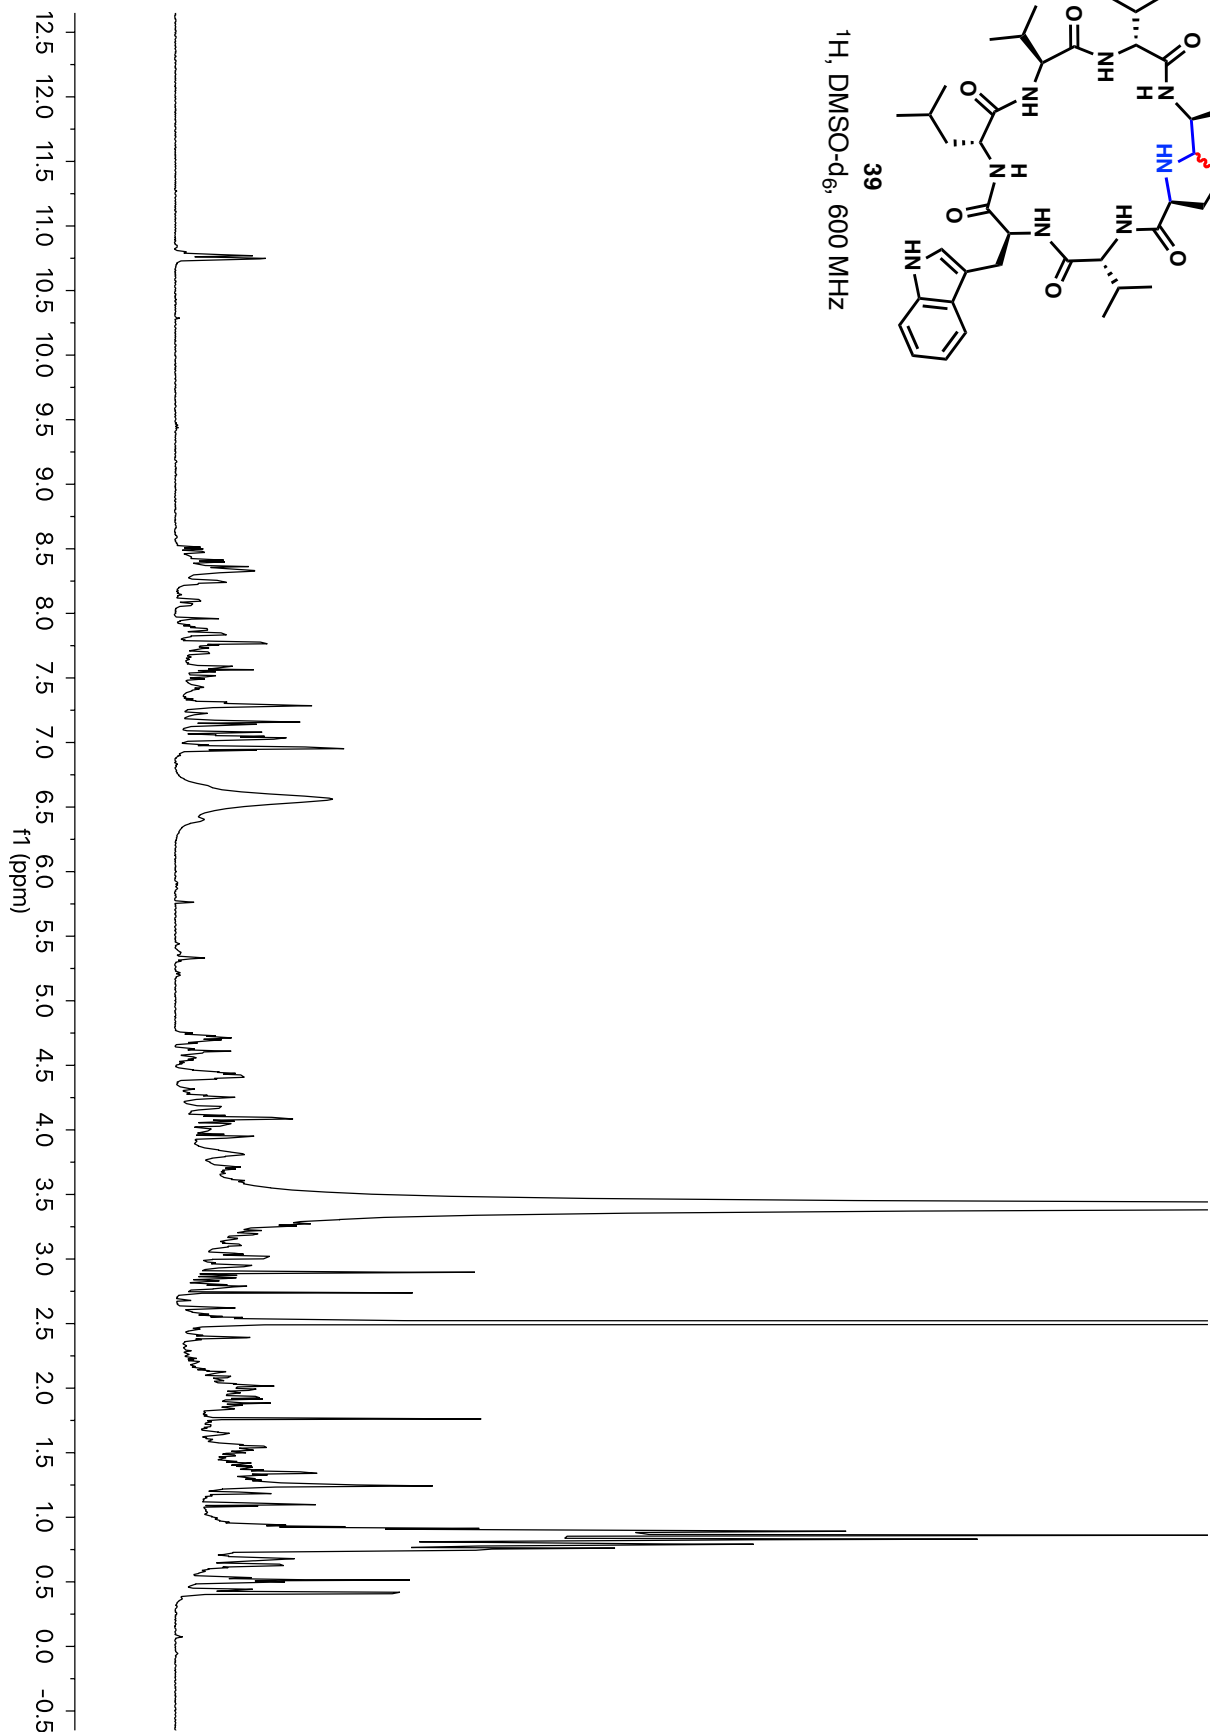

39  
COSY, DMSO-d<sub>6</sub>, 600 MHz

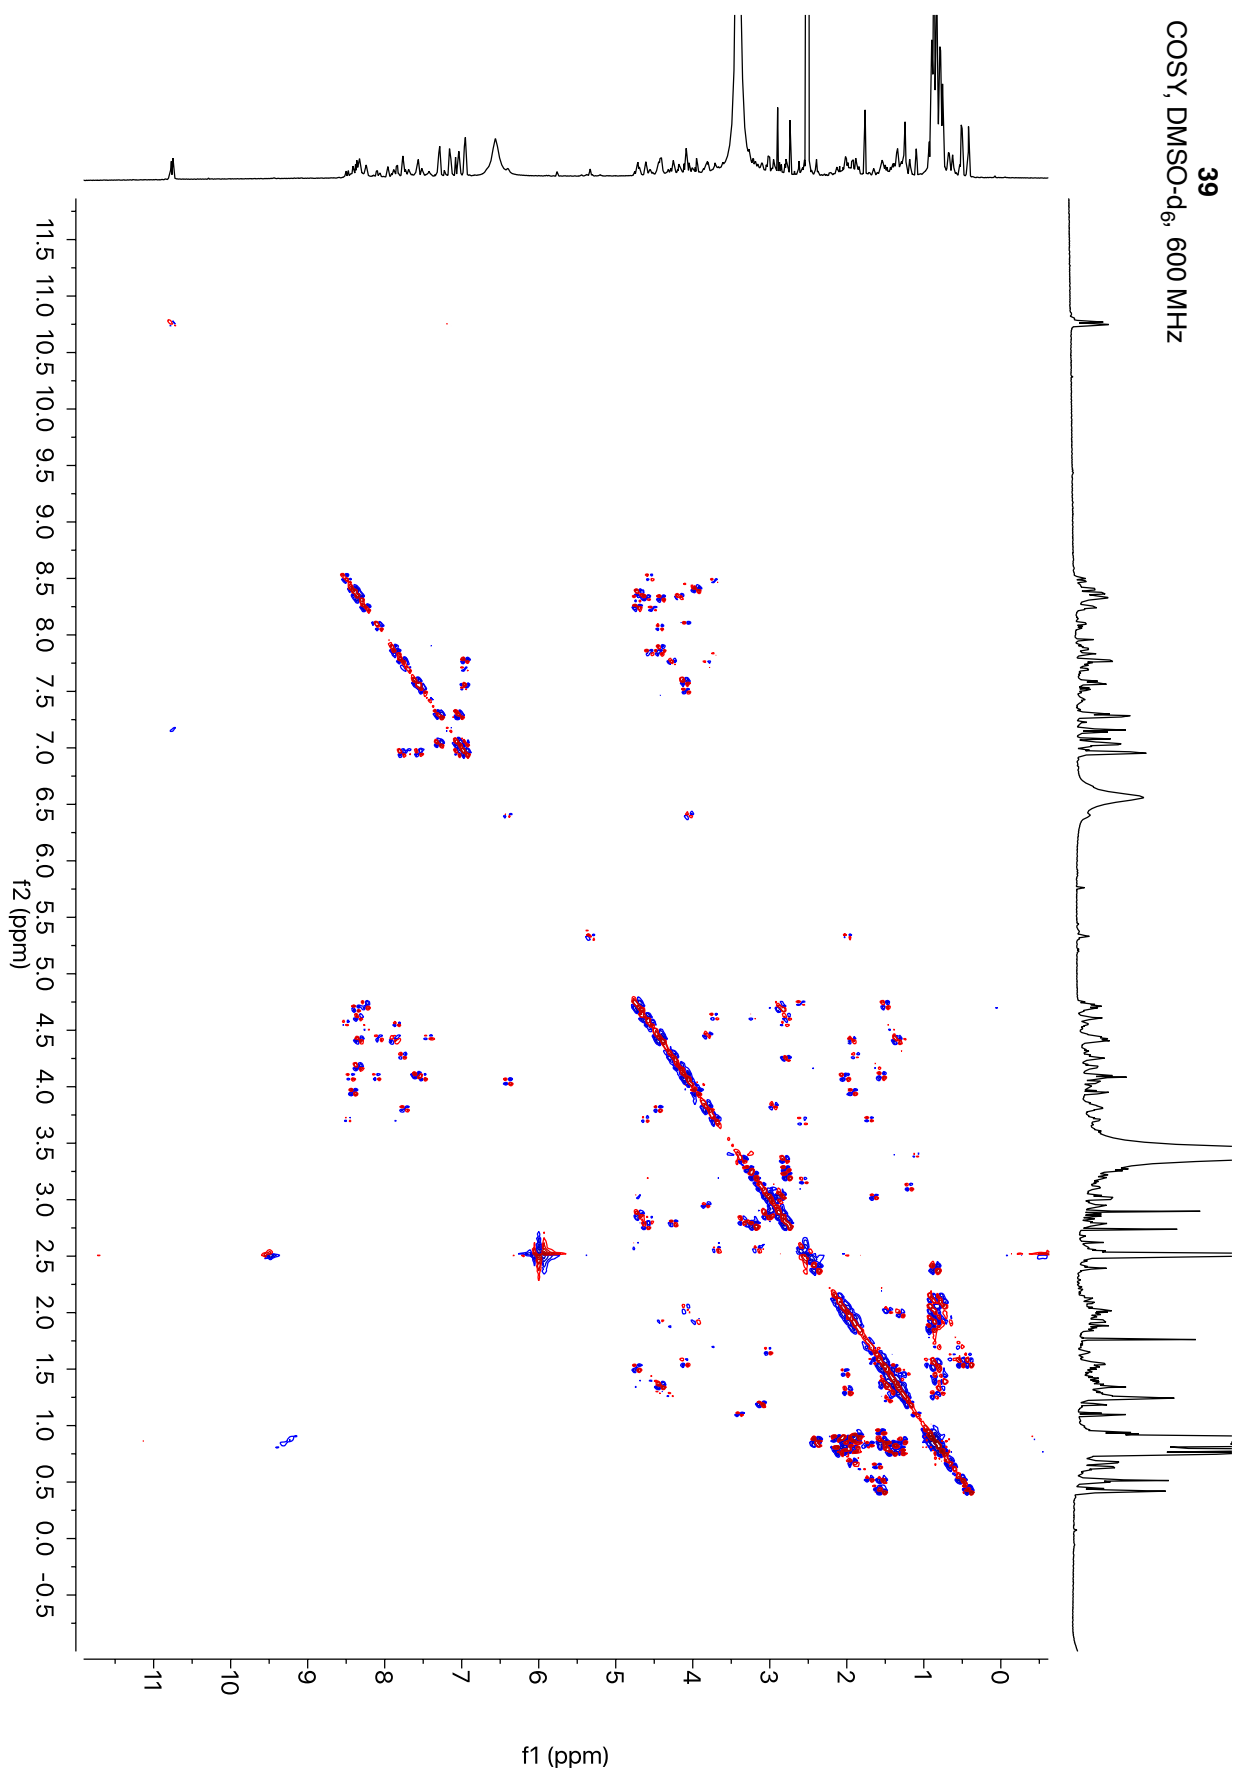



**39**  
ROESY, DMSO-d<sub>6</sub>, 600 MHz

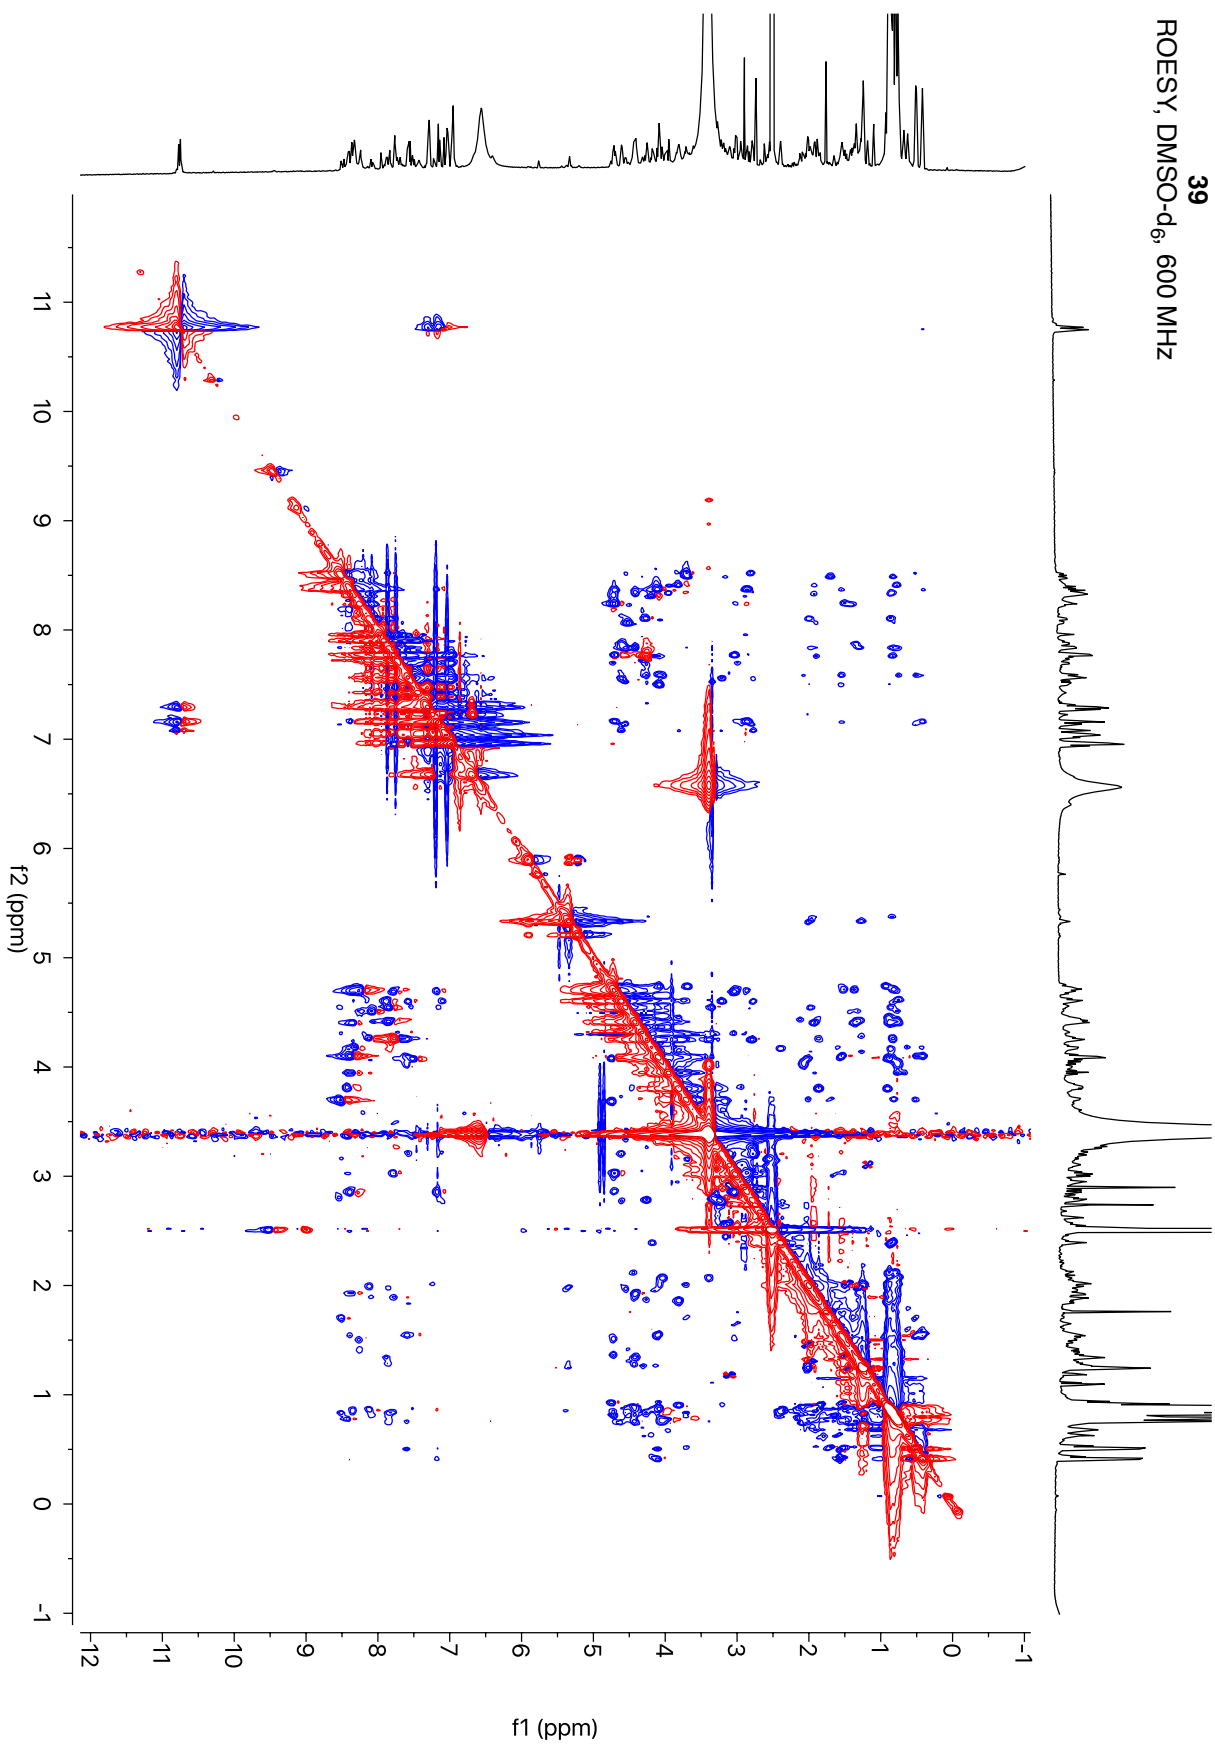

## Peptide 40

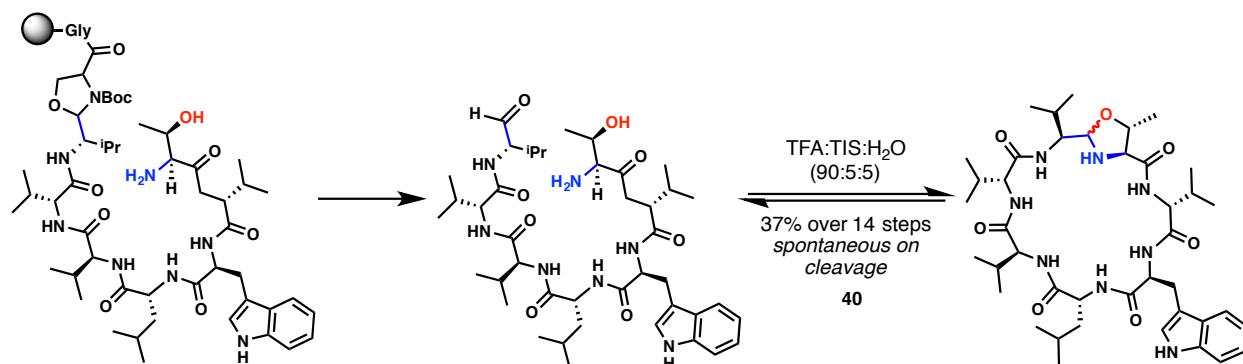

Amino aldehyde **40** was prepared on a 14.5  $\mu\text{mol}$  scale according to general procedure 2a. Fmoc-Leu-CHO was loaded onto Rink TG resin and the peptide elongated using standard Fmoc-SPPS protocols. Following cleavage from the resin and ether precipitation, the crude peptide was purified by preparative reverse-phase HPLC (50% B for 5 min, then 50% B to 100% B over 30 min) to afford Thr-lugdunin **40** (4.1 mg, 37% yield based on the original resin loading) as an interconverting mixture the linear amino aldehyde and the cyclized diastereomers, and as a white solid following lyophilization.

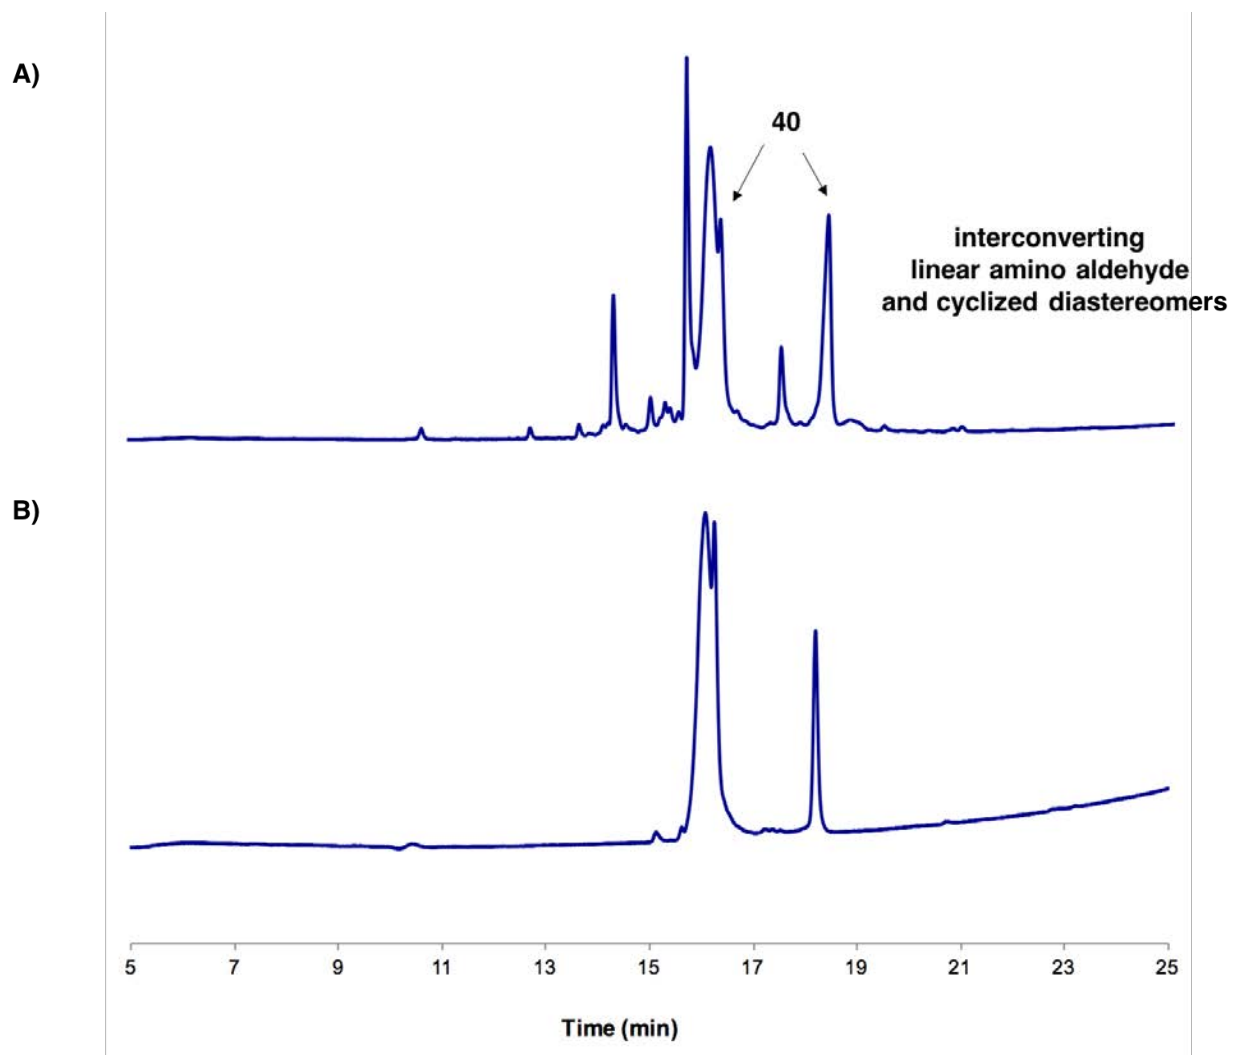

**A)** Crude analytical HPLC trace of the formation of **40** following cleavage from resin (5 to 100% B over 25 min,  $\lambda = 230$  nm). **B)** Purified peptide **40** ( $R_t = 16.07, 16.25, 18.20$  min, 5 to 100% B over 25 min,  $\lambda = 230$  nm).

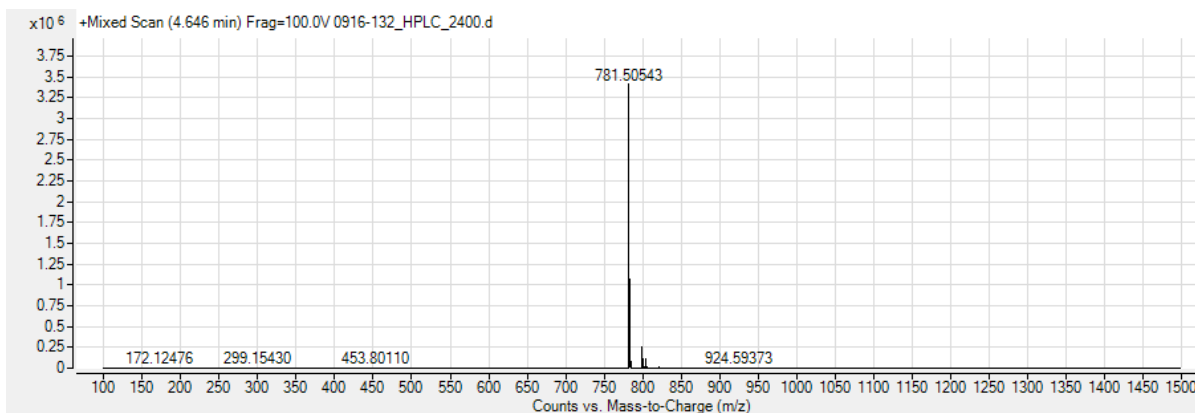

**LRMS (ESI-TOF):** calc'd for  $C_{41}H_{64}N_8O_7$   $[M+H]^+$  781.50; found 781.51 (cyclized).

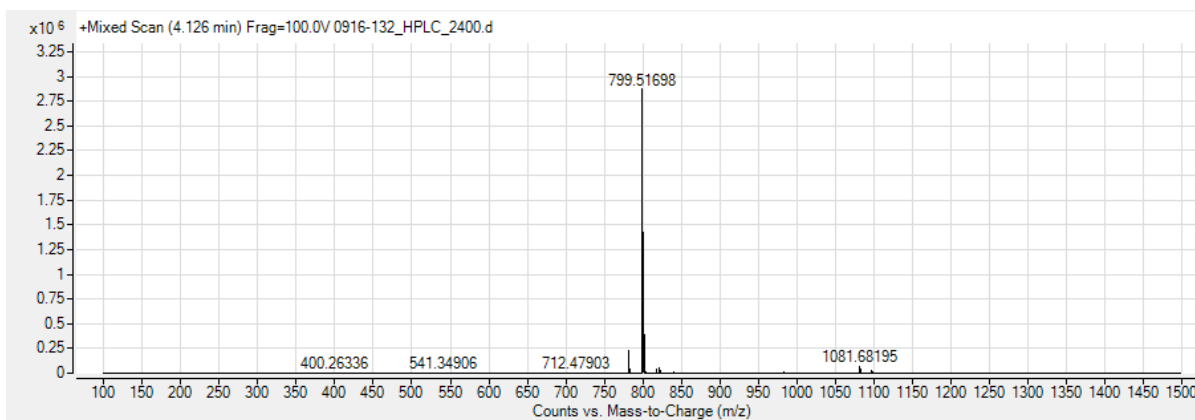

**LRMS (ESI-TOF):** calc'd for  $C_{41}H_{64}N_8O_7$   $[M+H]^+$  799.51; found 799.52 (linear).

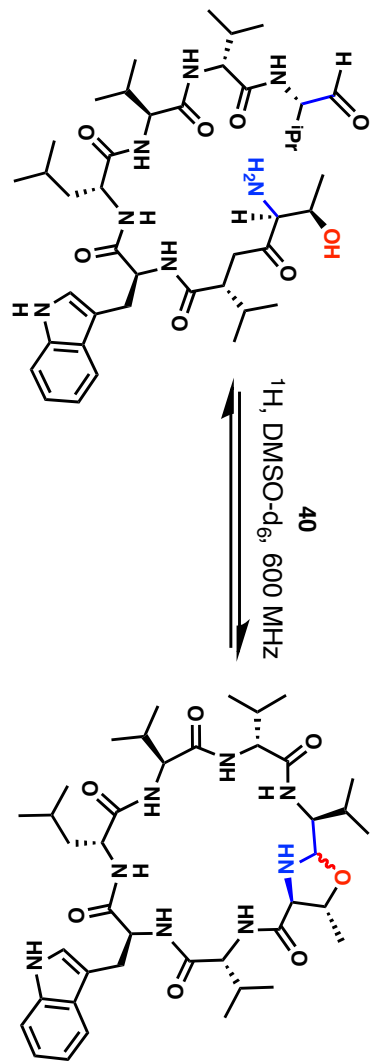

40  
ROESY, DMSO-d<sub>6</sub>, 600 MHz

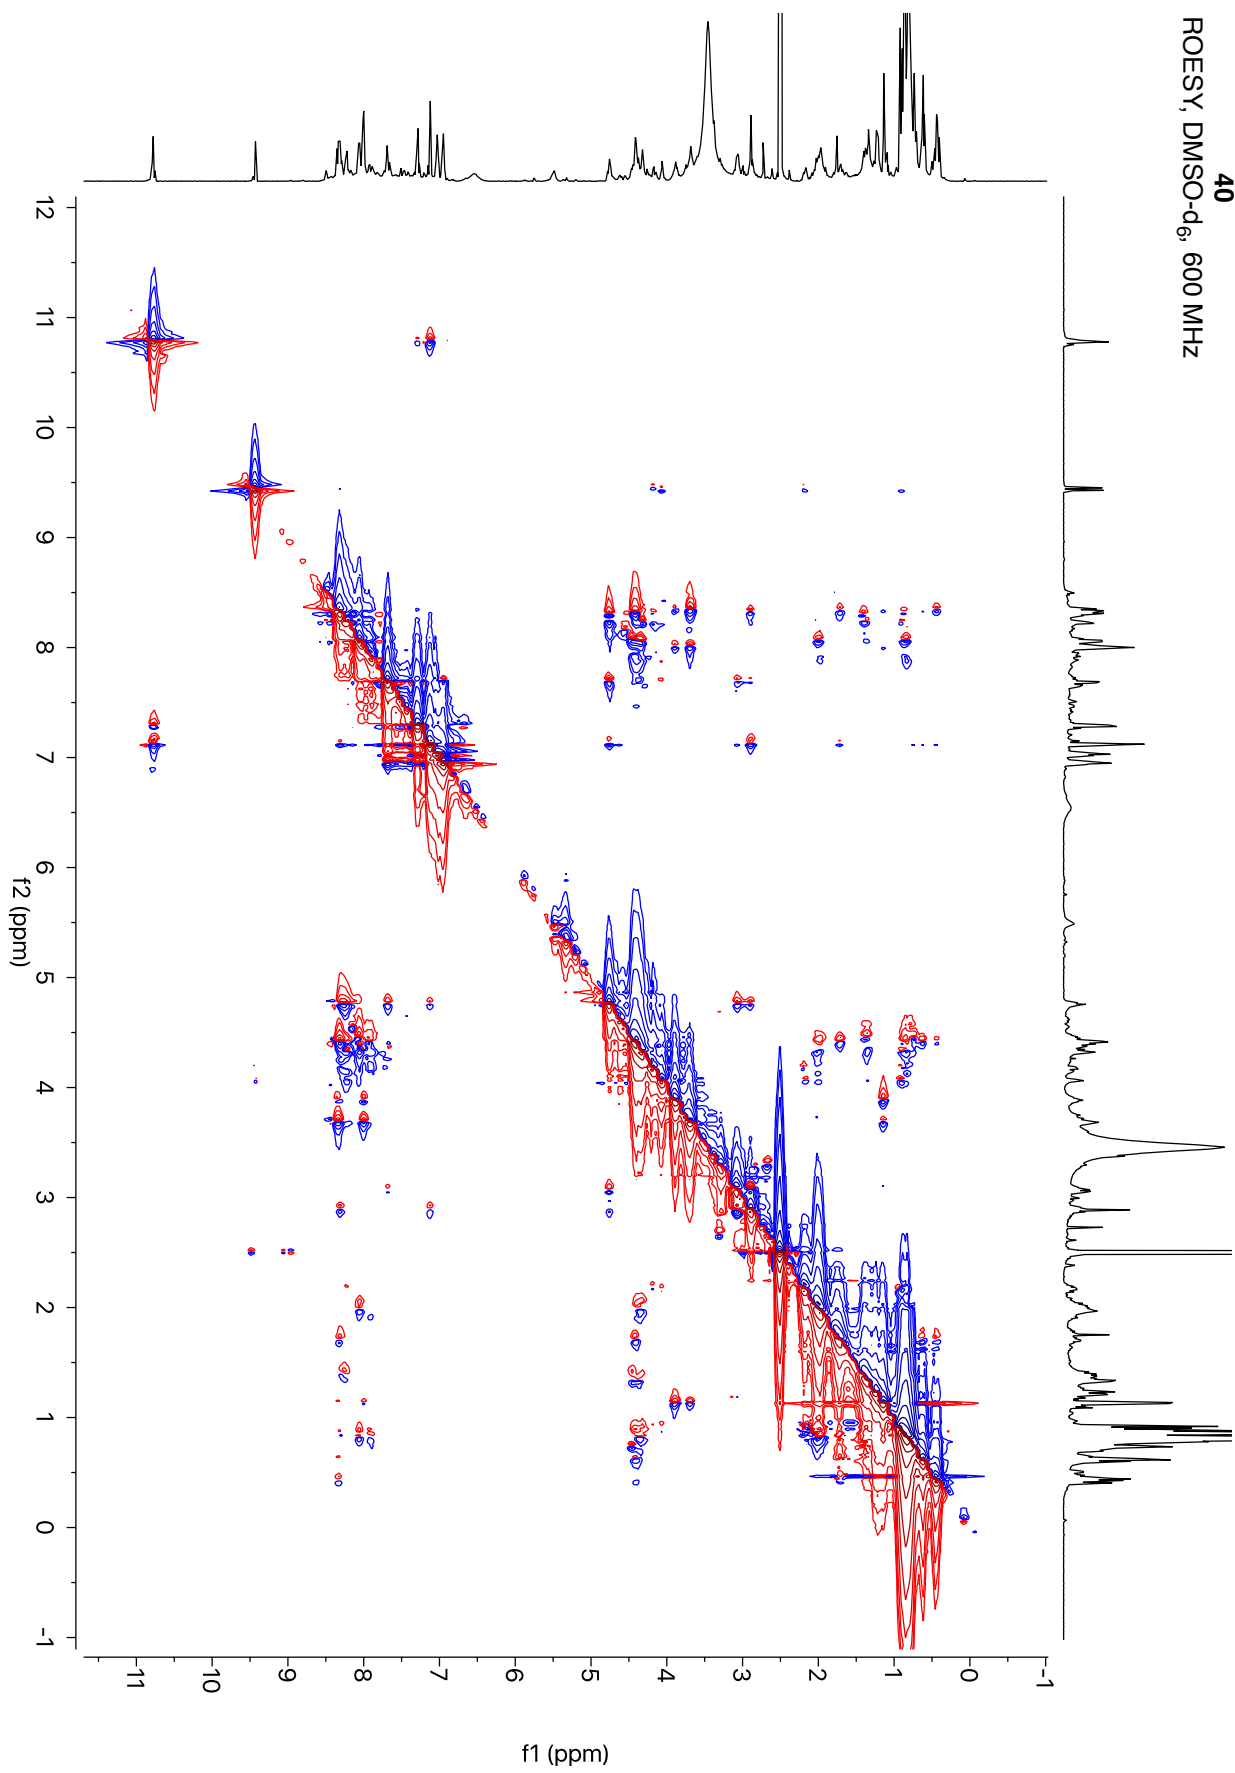

### Lugdunin Analogue Notes:

- As noted in the original report,<sup>15</sup> lugdunin (**39**) was isolated as a mixture of interconverting, inseparable diastereomers. A substantial (and inseparable) amount of the linear peptide aldehyde was observed in the case of **40**, while no aldehyde was apparent by analytical HPLC or LC-MS analysis in the case of **39**.
- Complete removal of the standard side-chain Fmoc-Trp(Boc)-OH protecting group proved difficult, so the unprotected Fmoc-Trp-OH was incorporated instead. In order to avoid potential acetylation of the free indole nitrogen, all subsequent capping steps were shortened to one 30-second treatment of 10% Ac<sub>2</sub>O in pyridine.

## Characterization Data for Sanguinamide A and Analogues

### Peptide S28

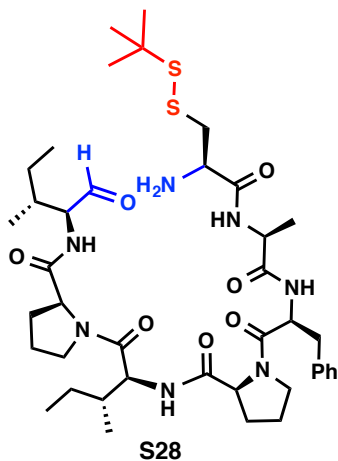

Amino aldehyde **S28** was prepared on a 50  $\mu\text{mol}$  scale according to general procedure 2a. Fmoc-Ile-CHO was loaded onto Rink TG resin and the peptide elongated using standard Fmoc-SPPS. Following cleavage from the resin and ether precipitation, the crude peptide was purified by preparative reverse-phase HPLC (30% B for 5 min, then 30% B to 80% B over 35 min) to afford peptide **S28** (26.6 mg, 64% yield based on the original resin loading) as a white solid following lyophilization.



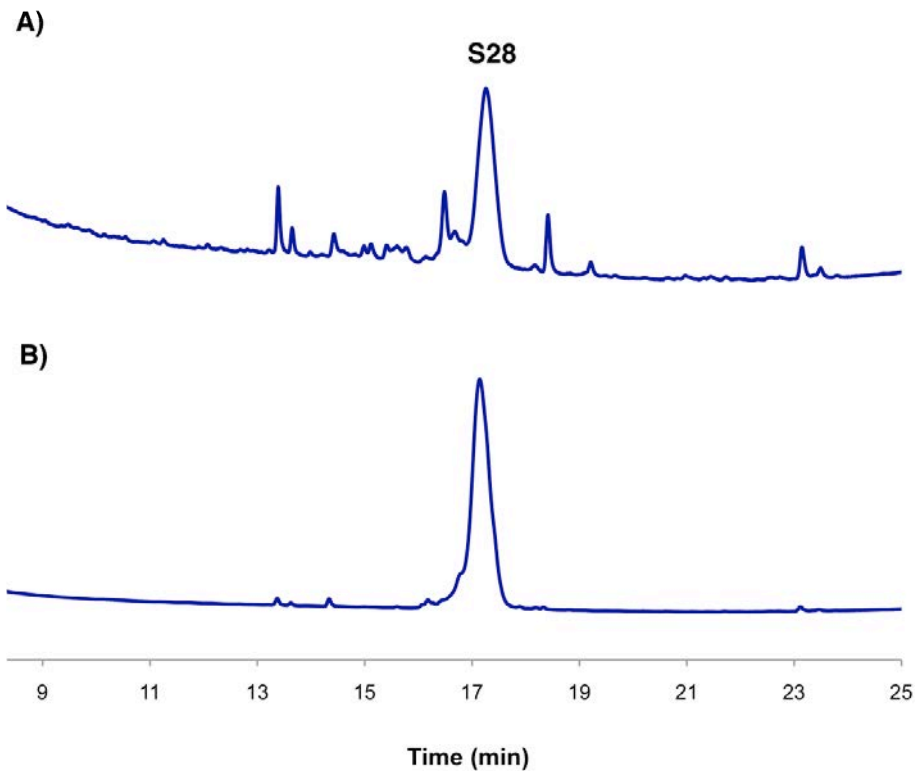

**A)** Crude analytical HPLC trace of amino aldehyde **S28** following Fmoc-SPPS and acidic cleavage from the resin (0 to 100% B over 25 min,  $\lambda = 230$  nm). **B)** Purified peptide **S28** (Rt = 17.1 min, 0 to 100% B over 25 min,  $\lambda = 230$  nm).

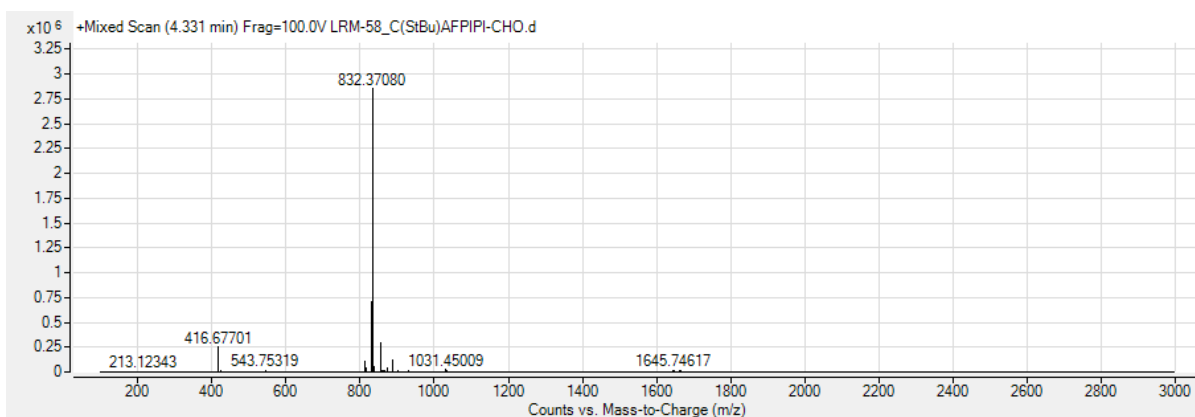

**LRMS (ESI-TOF):** calc'd for  $C_{41}H_{66}N_7O_7S_2$   $[M+H]^+$  832.45; found 832.37.

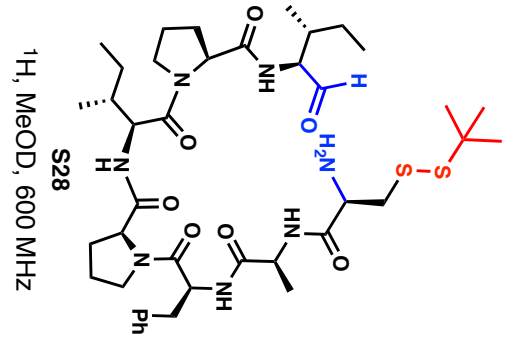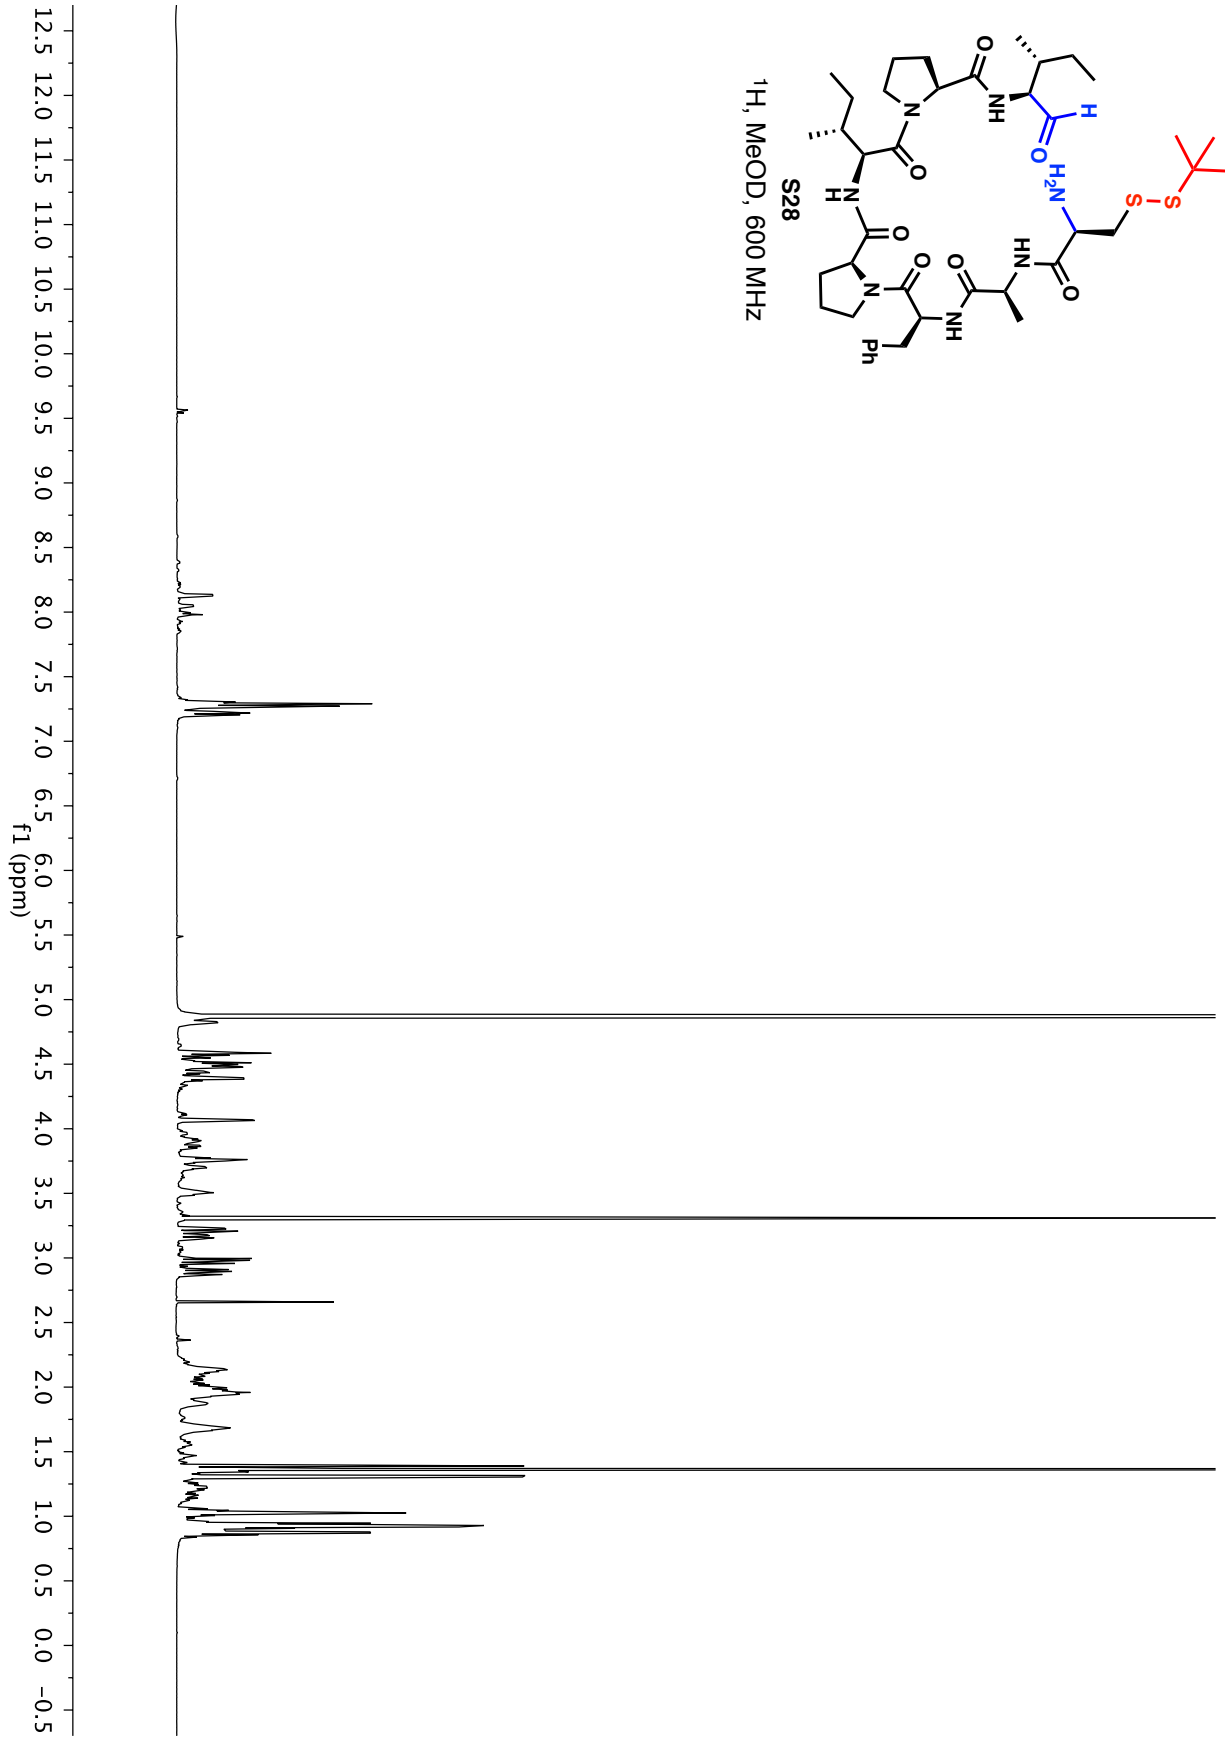

## Peptide S29

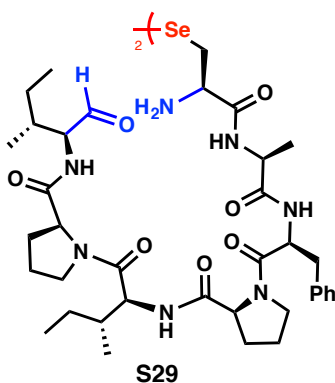

Amino aldehyde **S29** was prepared on a 40  $\mu\text{mol}$  scale according to general procedure 2a. Fmoc-Ile-CHO was loaded onto Rink TG resin and the peptide elongated using standard Fmoc-SPPS. Following cleavage from the resin and ether precipitation, the crude peptide was purified by preparative reverse-phase HPLC (25% B for 5 min, then 25% B to 70% B over 30 min) to afford peptide **S29** (6.9 mg, 22% yield based on the original resin loading) as a white solid following lyophilization.

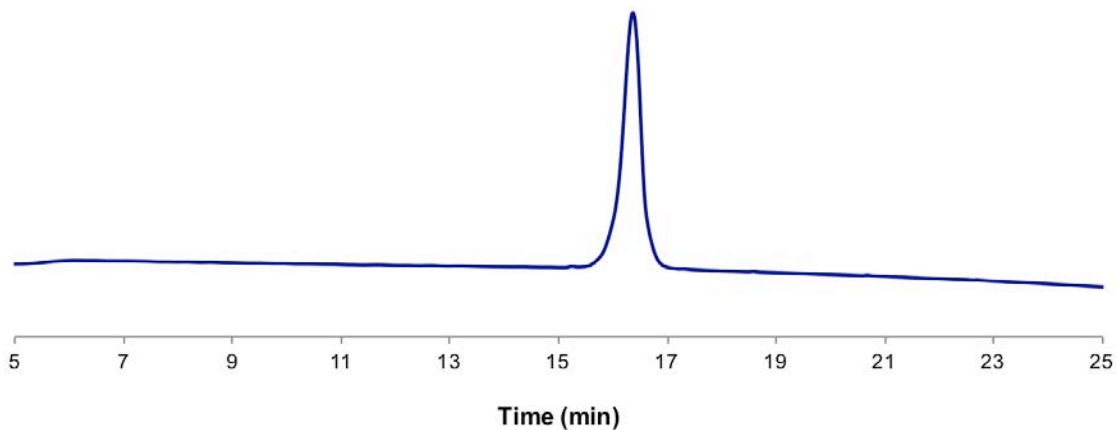

Purified peptide **S29** ( $R_t = 16.3$  min, 5 to 100% B over 25 min,  $\lambda = 210$  nm).

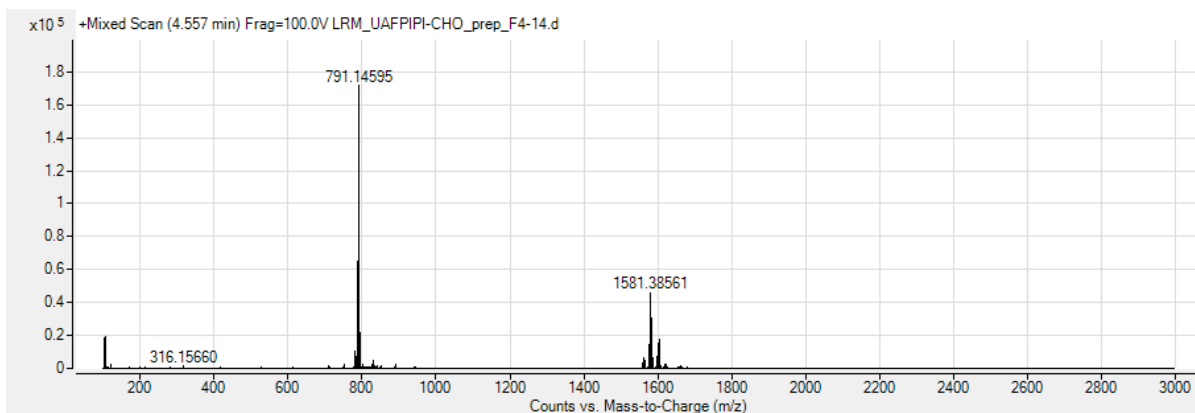

**LRMS (ESI-TOF):** calc'd for  $C_{74}H_{113}N_{14}O_{14}Se_2$   $[M+H]^+$  1581.69; found 1581.39,  $[M+2H]^{2+}$  791.33; found 791.15.

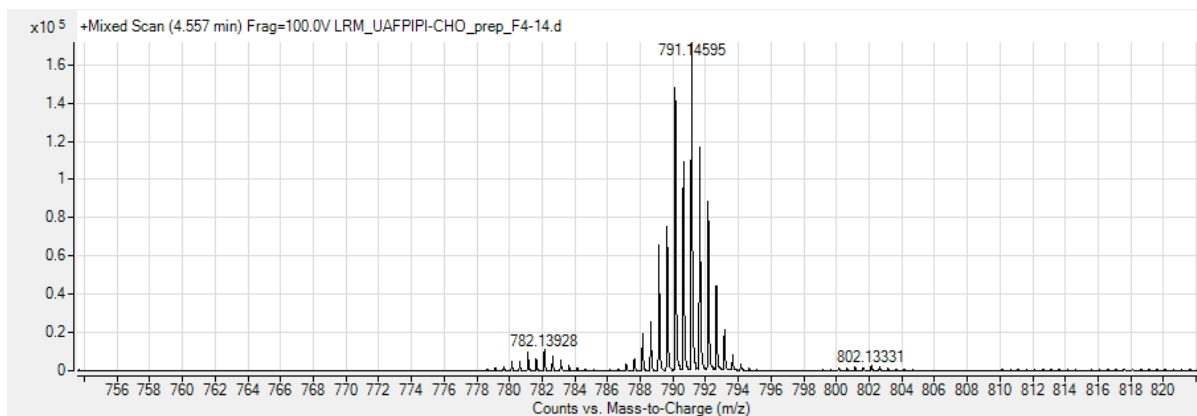

**LRMS (ESI-TOF):** Zoom-in of LRMS spectrum showing the isotopic distribution characteristic of a diselenide.

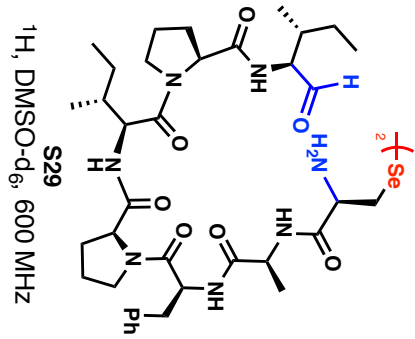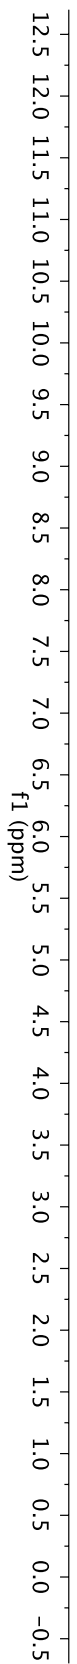

## Peptide 41

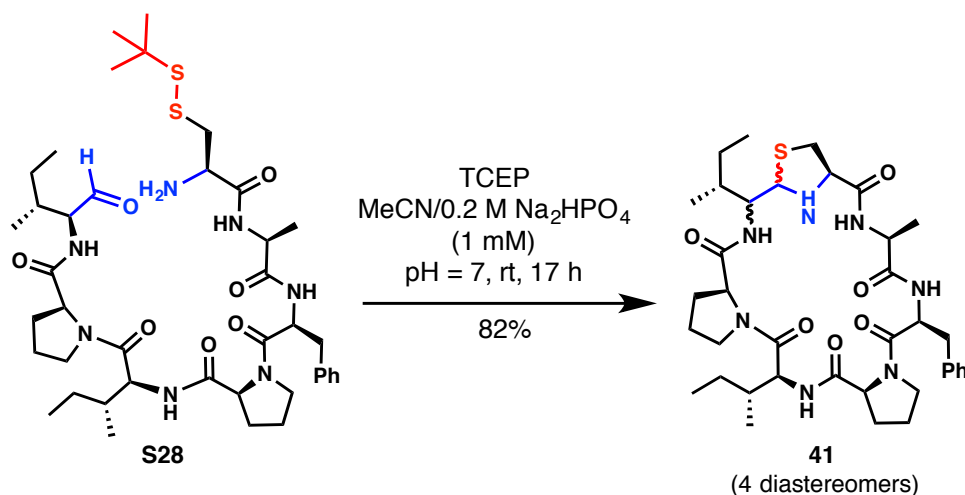

Peptide **41** was prepared according to general procedure 5 from *S*tBu-disulfide protected linear amino aldehyde **S28** (6.4 mg, 7.7  $\mu$ mol). The peptide aldehyde was solubilized in a mixture of MeCN (3 mL) and 0.2 M Na<sub>2</sub>HPO<sub>4</sub> (4.7 mL, pH = 7) and treated with TCEP. At t = 17 h, the reaction was purified by preparative reverse-phase HPLC (35% B for 5 min, 35% to 70% B over 30 min) to afford peptide macrocycle **41** (4.6 mg, 82% yield) as a mixture of four diastereomers and as a white solid following lyophilization.

A) t = 17 h

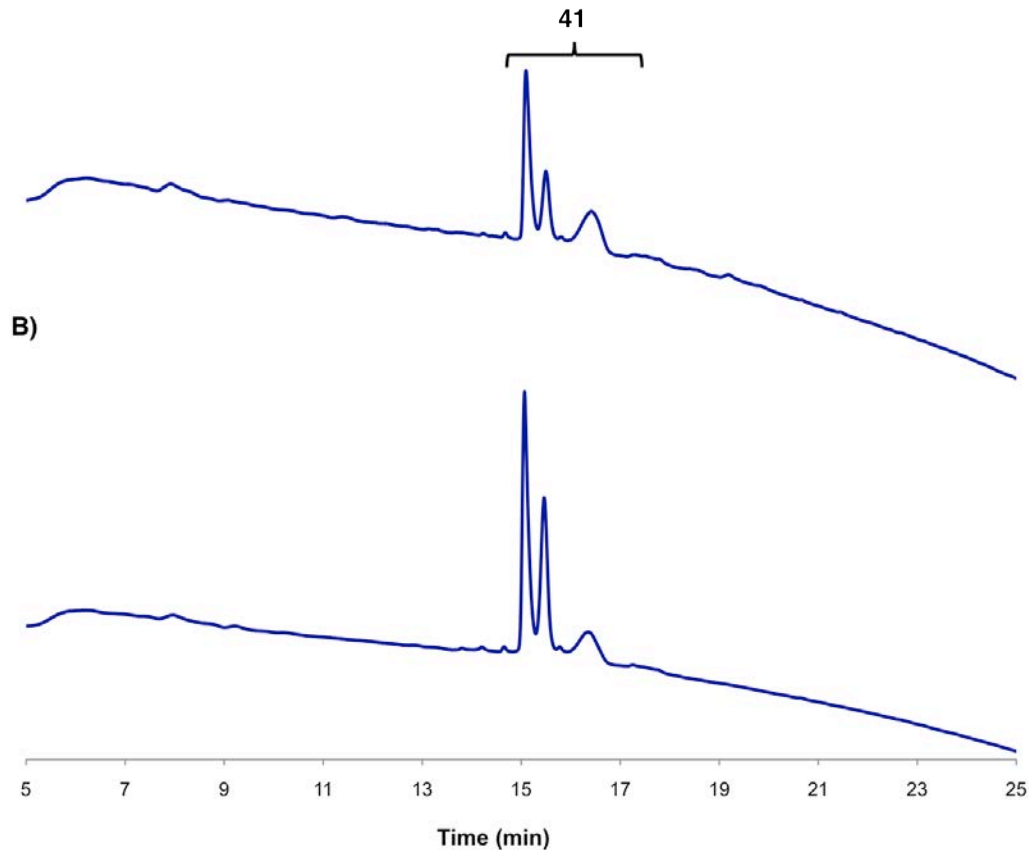

A) Crude analytical HPLC trace of the formation of **41** from amino aldehyde **S28** following thiazolidine macrocyclization (5 to 100% B over 25 min,  $\lambda = 210$  nm). B) Purified diastereomeric peptide **41** (Rt = 15.1, 15.4, 16.3 min, 5 to 100% B over 25 min,  $\lambda = 210$  nm).

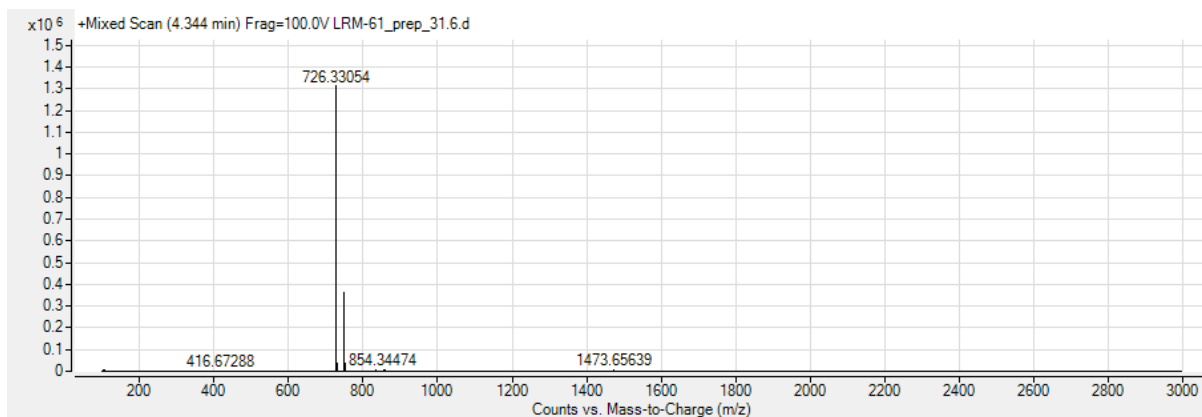

LRMS (ESI-TOF): calc'd for C<sub>37</sub>H<sub>56</sub>N<sub>7</sub>O<sub>6</sub>S [M+H]<sup>+</sup> 726.40; found 726.33.

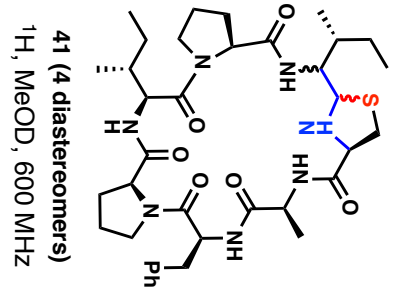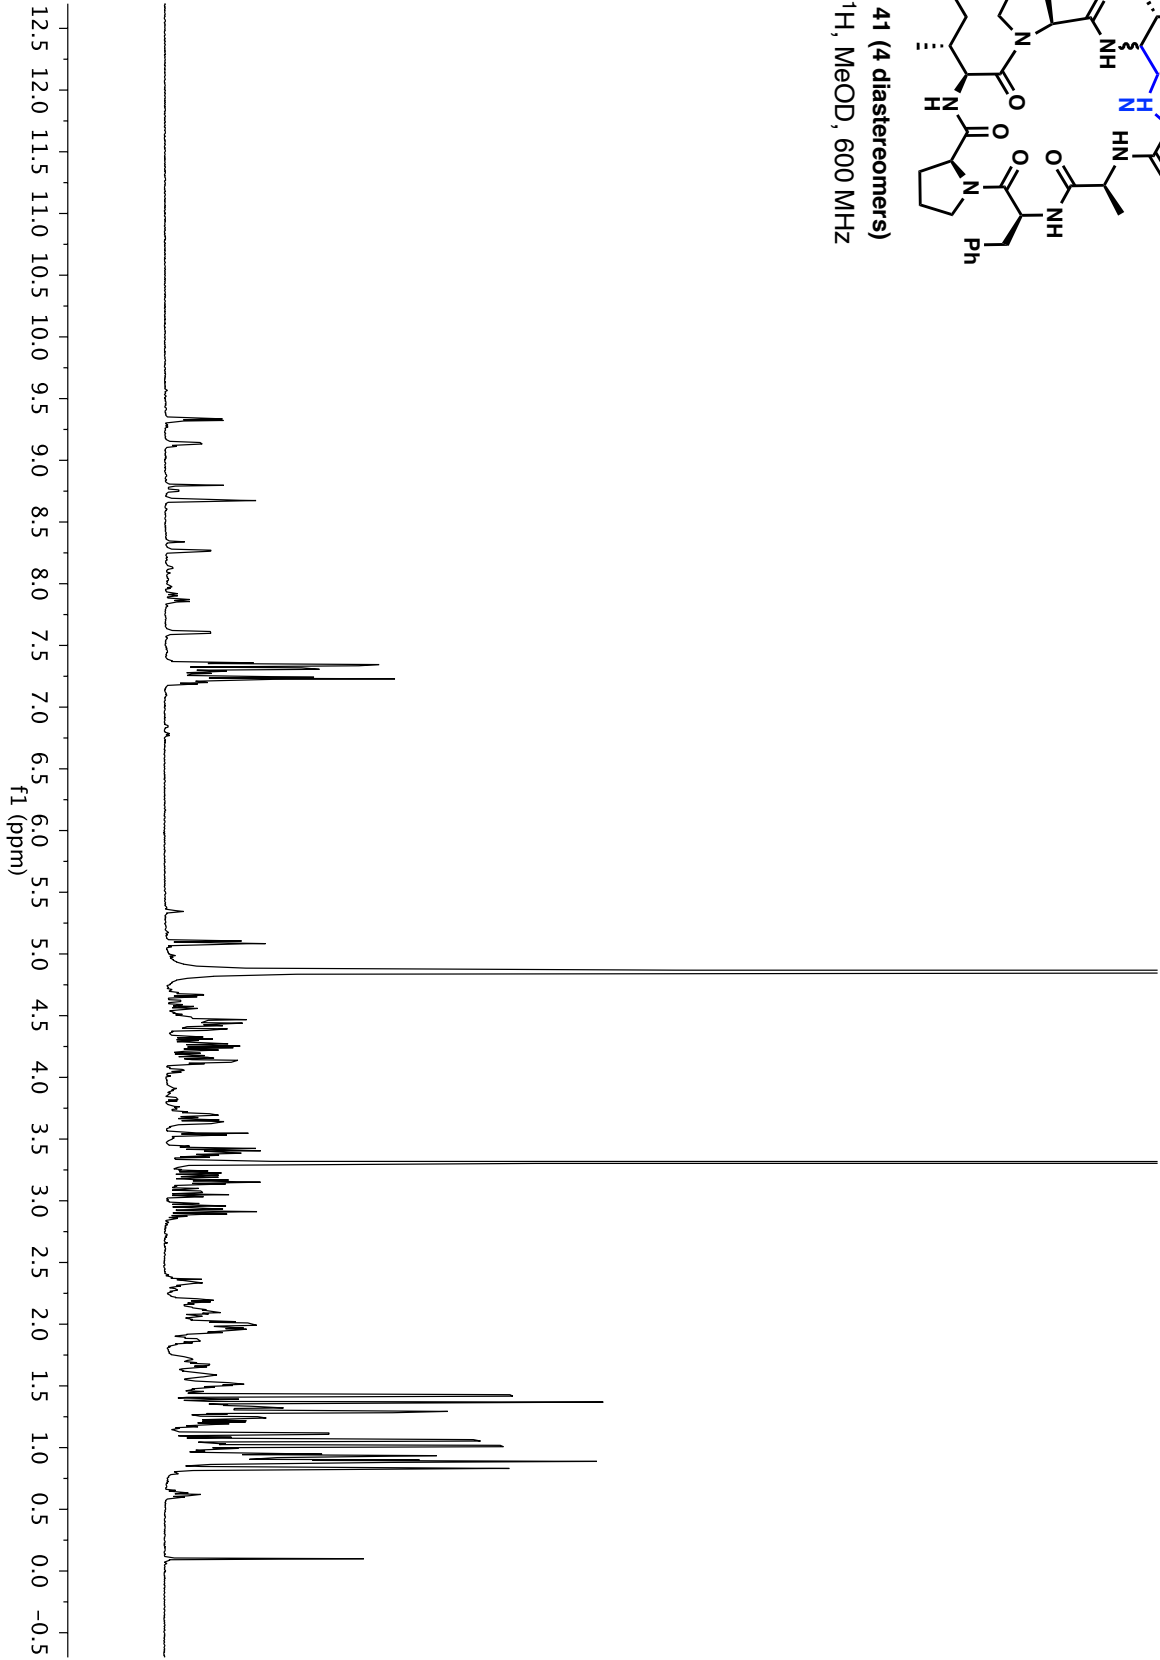



41 (4 diastereomers)  
COSY, DMSO-d<sub>6</sub>, 600 MHz

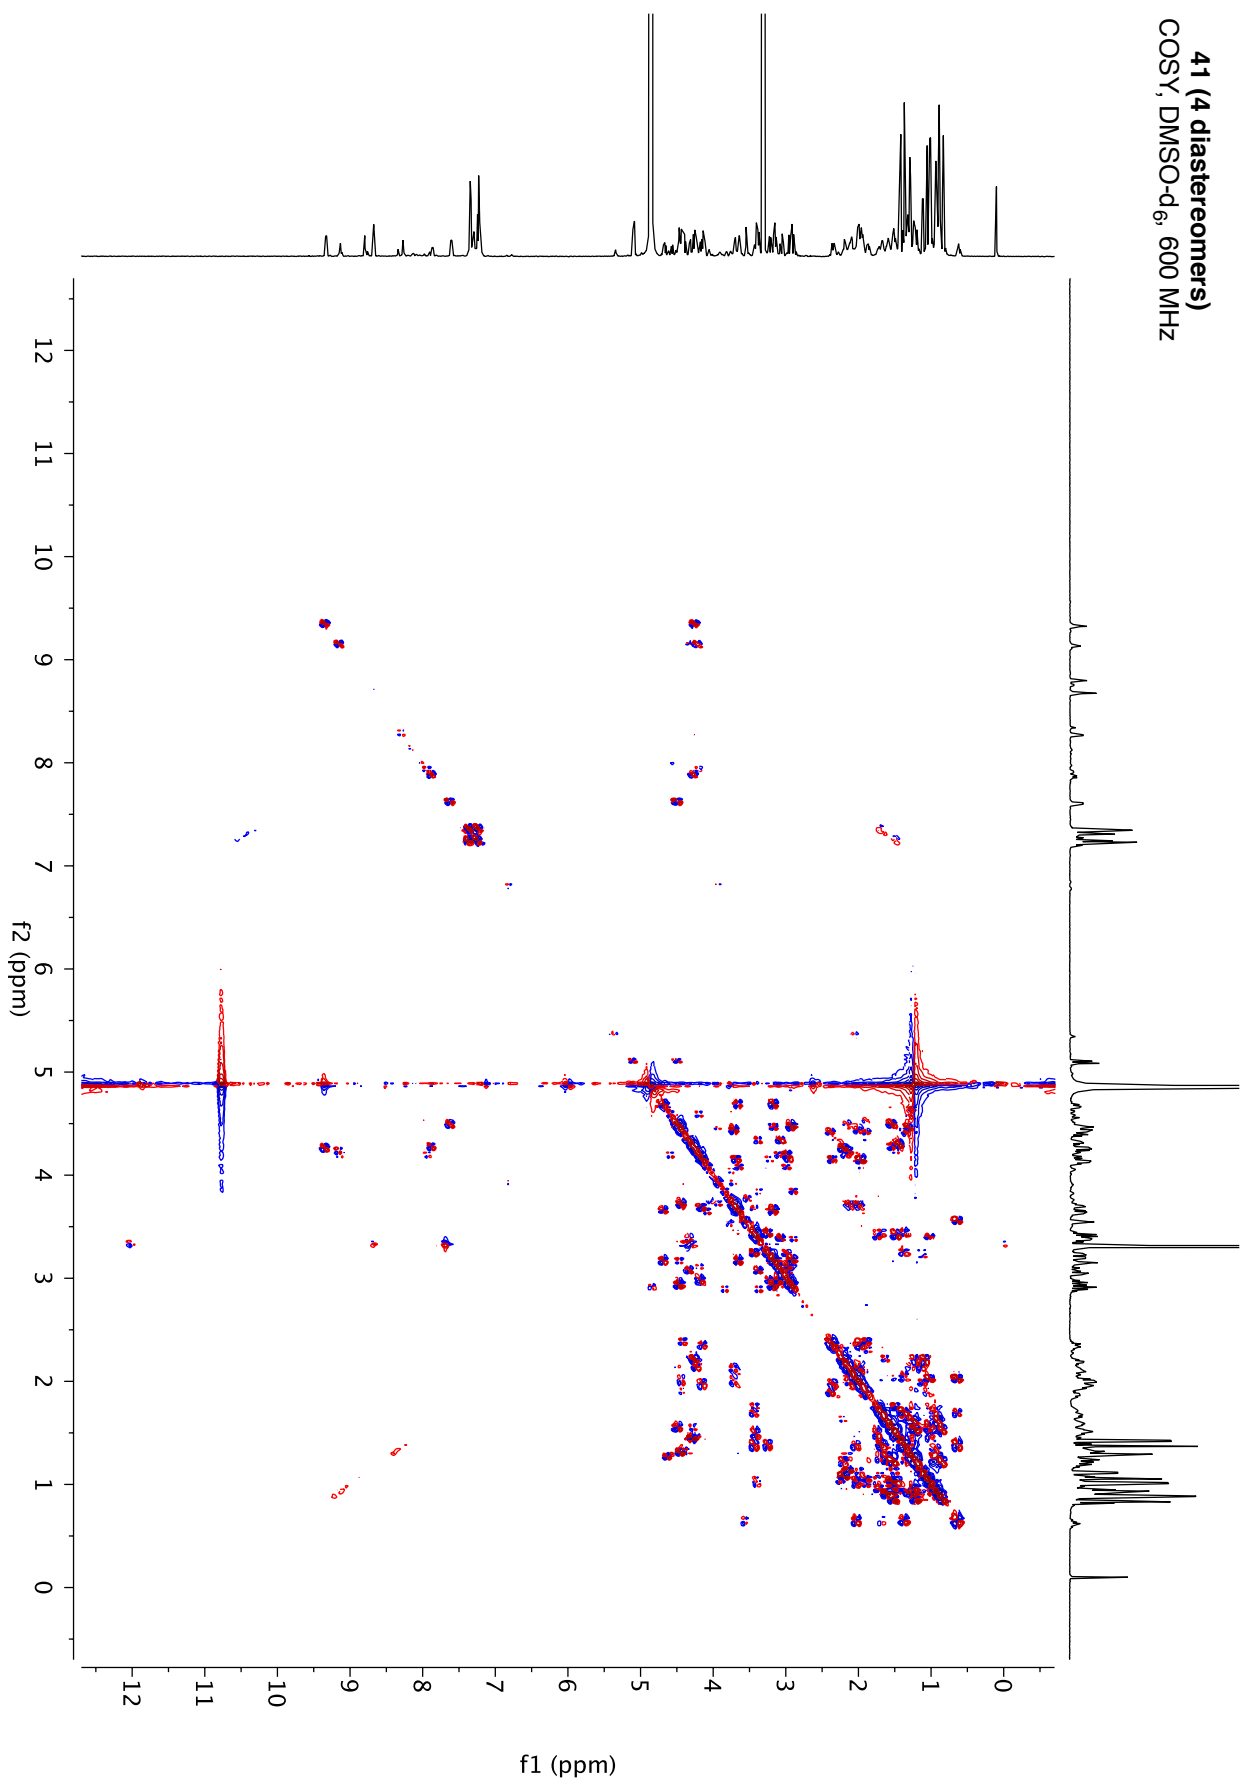

## Peptide 42

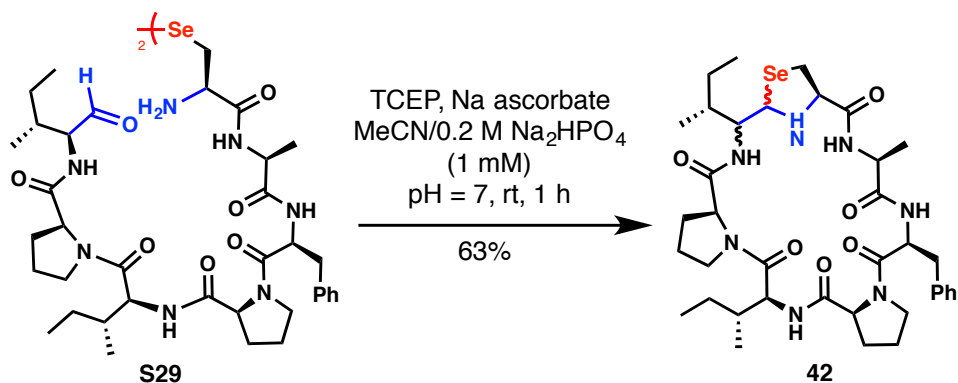

Peptide **42** was prepared according to general procedure 6 from linear amino aldehyde selenocystine dimer **S29** (5.7 mg, 3.6  $\mu$ mol). The peptide aldehyde was solubilized in a mixture of MeCN (2 mL) and 0.2 M Na<sub>2</sub>HPO<sub>4</sub> (5.2 mL, pH = 7) and treated with TCEP and sodium ascorbate. At t = 2 h, the reaction was purified by preparative reverse-phase HPLC (20% B to 35% B over 5 min, 35% to 80% B over 25 min) to afford peptide macrocycle **42** (3.5 mg, 63% yield) as a mixture of four diastereomers and as a white solid following lyophilization. *Note: The ratio of diastereomers fluctuates in different buffers and solvent systems (e.g. the formic acid eluent used on the LC-MS and TFA buffer used for analytical HPLC give rise to different ratios of the diastereomeric products).*

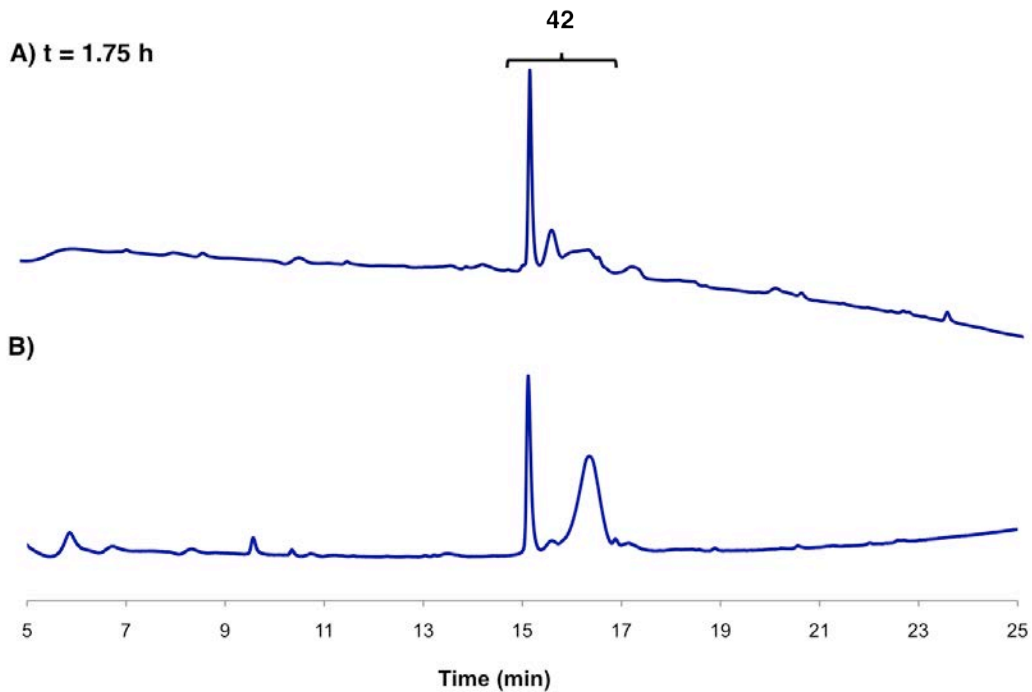

**A)** Crude analytical HPLC trace of the formation of **42** from amino aldehyde **S29** following selenazolidine macrocyclization (5 to 100% B over 25 min,  $\lambda = 210$  nm). **B)** Purified peptide **42** as a mixture of diastereomers (5 to 100% B over 25 min,  $\lambda = 230$  nm). Note: the purified sample was taken from a mixture of DMSO following NMR analysis.

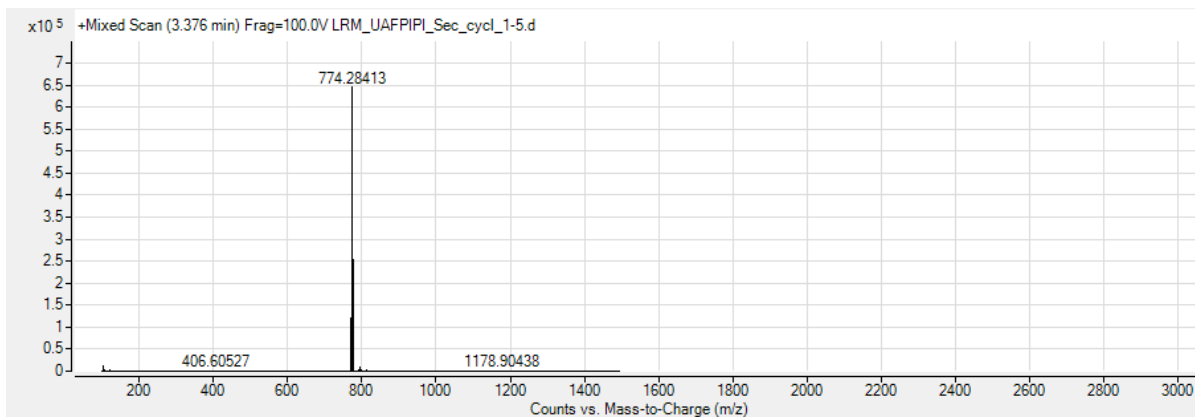

**LRMS (ESI-TOF):** calc'd for  $C_{37}H_{56}N_7O_6Se$   $[M+H]^+$  774.35; found 774.28.



### Peptide 43 (Sanguinamide A)

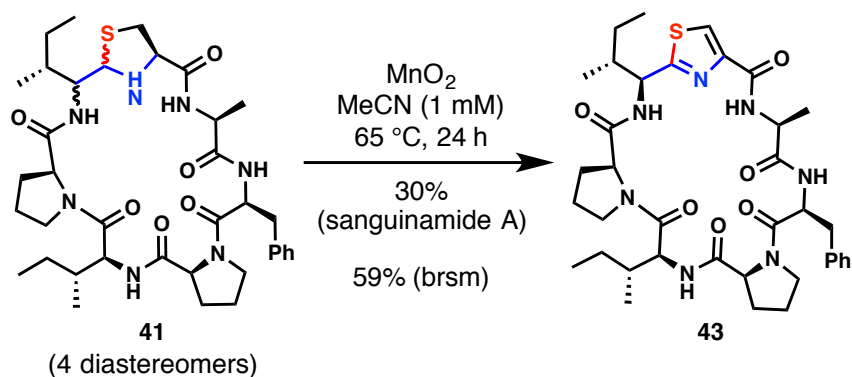

Peptide **43** was prepared from diastereomeric thiazolidines **41** upon oxidation with  $\text{MnO}_2$ . Peptide **41** (3.4 mg,  $4.7\text{ }\mu\text{mol}$ ) was dissolved in MeCN (1 mM concentration) and treated with  $\text{MnO}_2$  (50 eq.). The resulting mixture was heated at  $65\text{ }^\circ\text{C}$  and monitored by LC-MS. At  $t = 24\text{ h}$ , the reaction was filtered and purified by preparative reverse-phase HPLC (45% B for 5 min, 45% to 80% B over 30 min) to afford Sanguinamide A (**43**) (1.0 mg, 30% yield) and recovered thiazolidine starting material **41** (1.0 mg, 29%) as white solids following lyophilization.

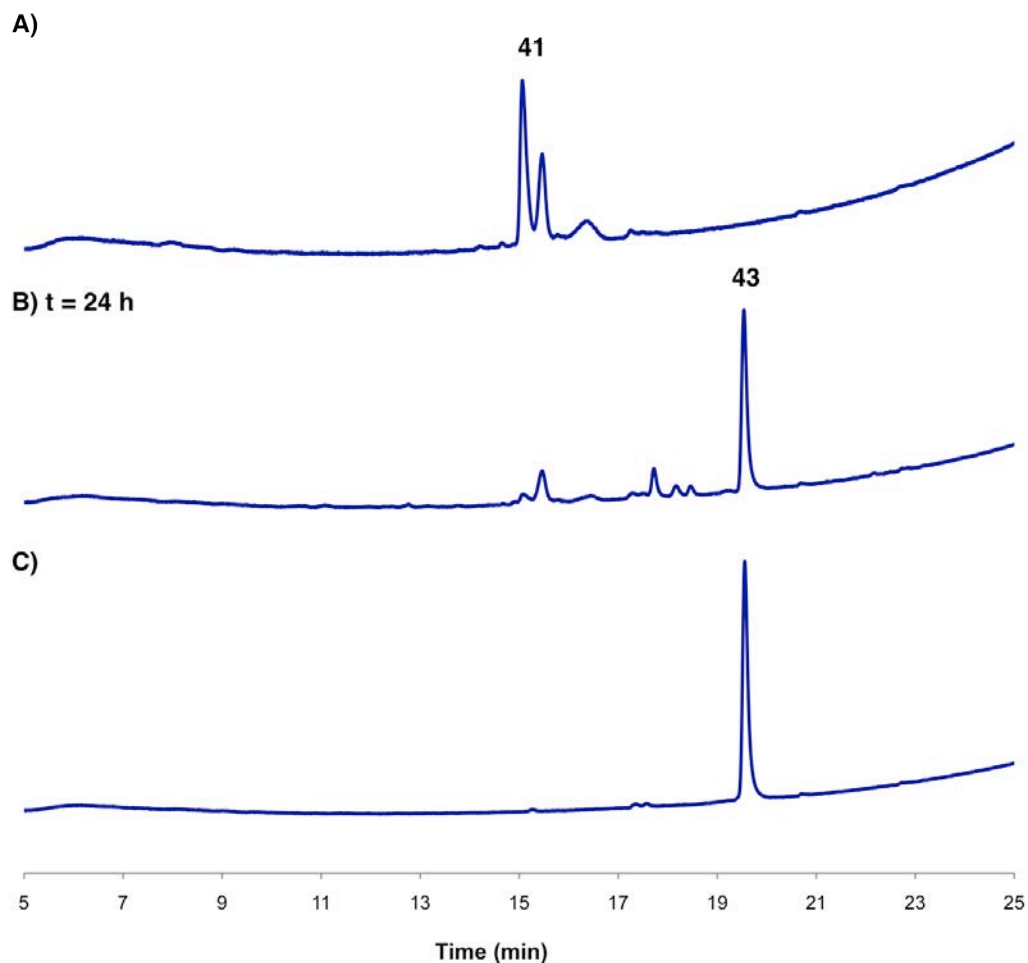

**A)** Starting thiazolidine **41** as a mixture of diastereomers (5 to 100% B over 25 min,  $\lambda = 230$  nm). **B)** Crude analytical HPLC trace of the formation of **43** following oxidation with  $\text{MnO}_2$  (5 to 100% B over 25 min,  $\lambda = 230$  nm). **C)** Purified peptide **43** ( $R_t = 19.6$  min, 5 to 100% B over 25 min,  $\lambda = 230$  nm).

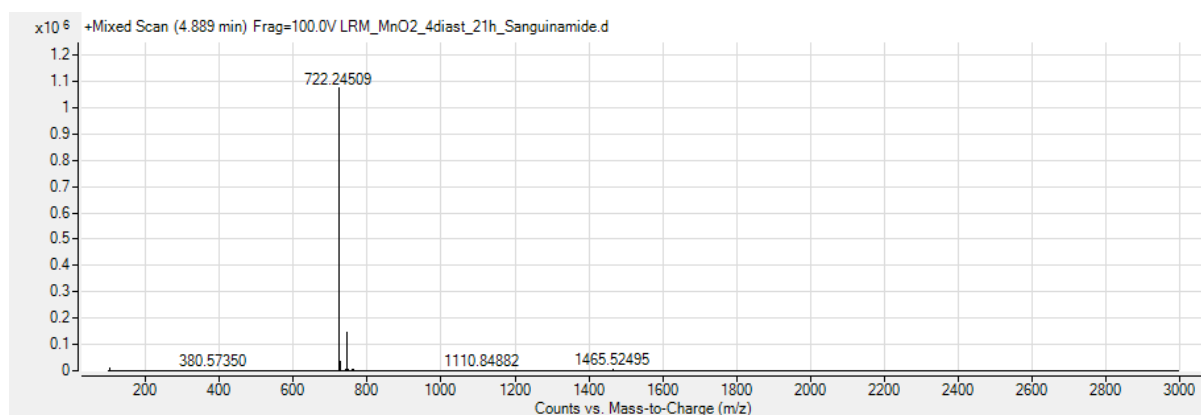

**LRMS (ESI-TOF):** calc'd for  $\text{C}_{37}\text{H}_{52}\text{N}_7\text{O}_6\text{S}$   $[\text{M}+\text{H}]^+$  722.37; found 722.25.

Note: Sanguinamide A (**43**) could also be prepared from a single isolated thiazolidine diastereomer (unknown configuration at the thiazolidine). The oxidation step proceeded in 93% yield to afford Sanguinamide A:

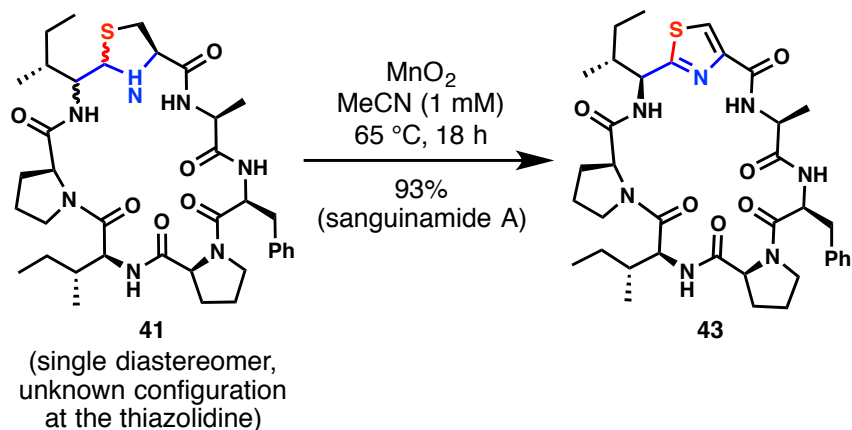

Thiazolidine **41** was prepared according to general procedure 5 and purified by preparative reverse-phase HPLC. A single diastereomer of **41** (2.6 mg, 3.6  $\mu\text{mol}$ , unknown configuration at the thiazolidine) was isolated and subjected to oxidation with  $\text{MnO}_2$  as described above. After 18 h at  $65^\circ\text{C}$ , LC-MS analysis indicated consumption of the thiazolidine. The reaction was filtered and purified by preparative reverse-phase HPLC (45% B for 5 min, 45% to 85% B over 30 min) to afford Sanguinamide A (**43**) (2.4 mg, 93% yield) as a white solid following lyophilization.

A) t = 40 h (cyclization)

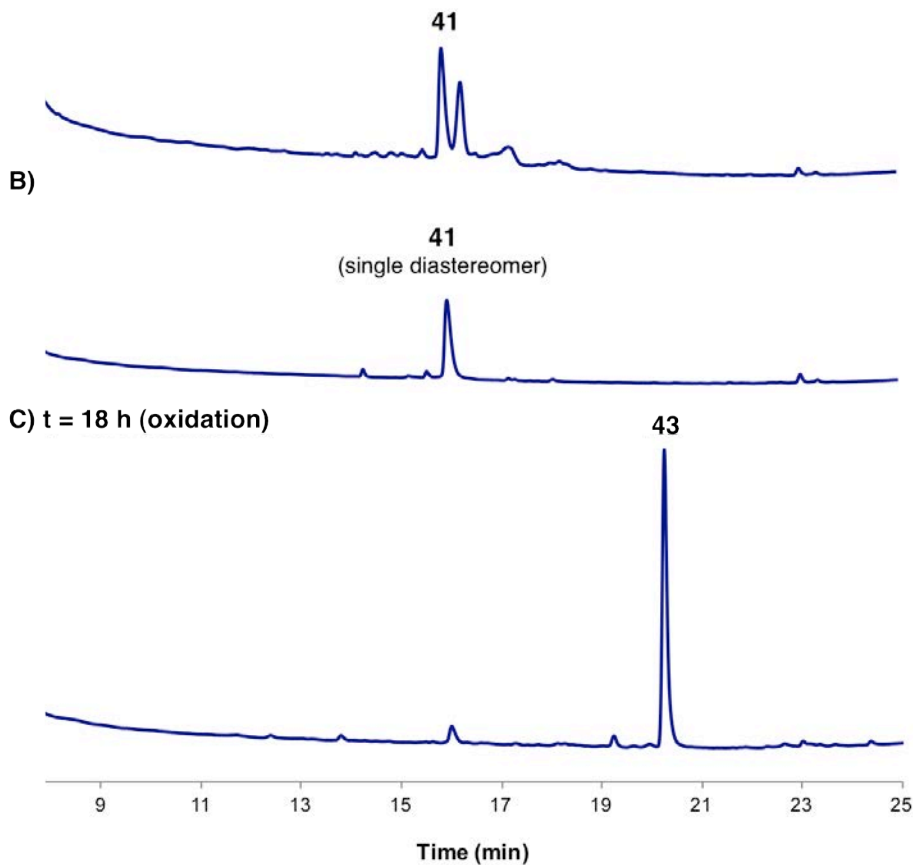

**A)** Crude thiazolidine **41** as a mixture of diastereomers (0 to 100% B over 25 min,  $\lambda = 230$  nm). **B)** A single, purified diastereomer of macrocyclic thiazolidine **41** ( $R_t = 16.0$  min, 0 to 100% B over 25 min,  $\lambda = 230$  nm). **C)** Crude analytical HPLC trace (following filtration) of the formation of **43** upon oxidation with  $MnO_2$  (0 to 100% B over 25 min,  $\lambda = 230$  nm).

The recorded NMR spectra for synthetic sanguinamide A (**43**) are in agreement with literature data.<sup>16</sup>



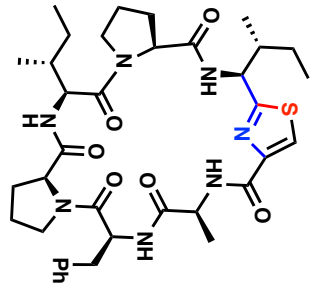

<sup>1</sup>H, DMSO-d<sub>6</sub>, 600 MHz

43

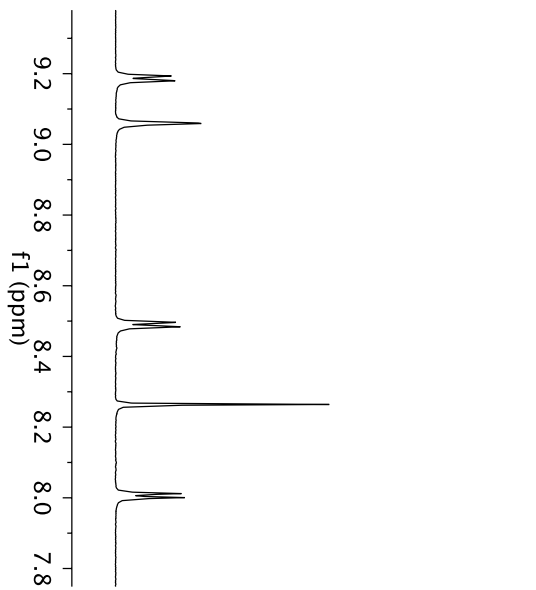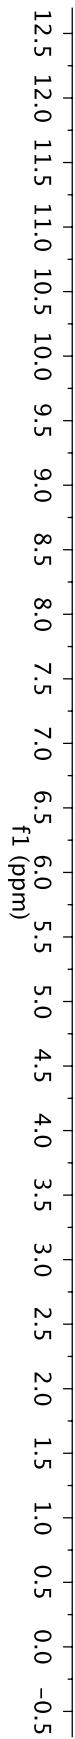

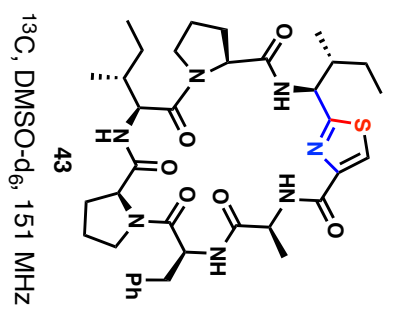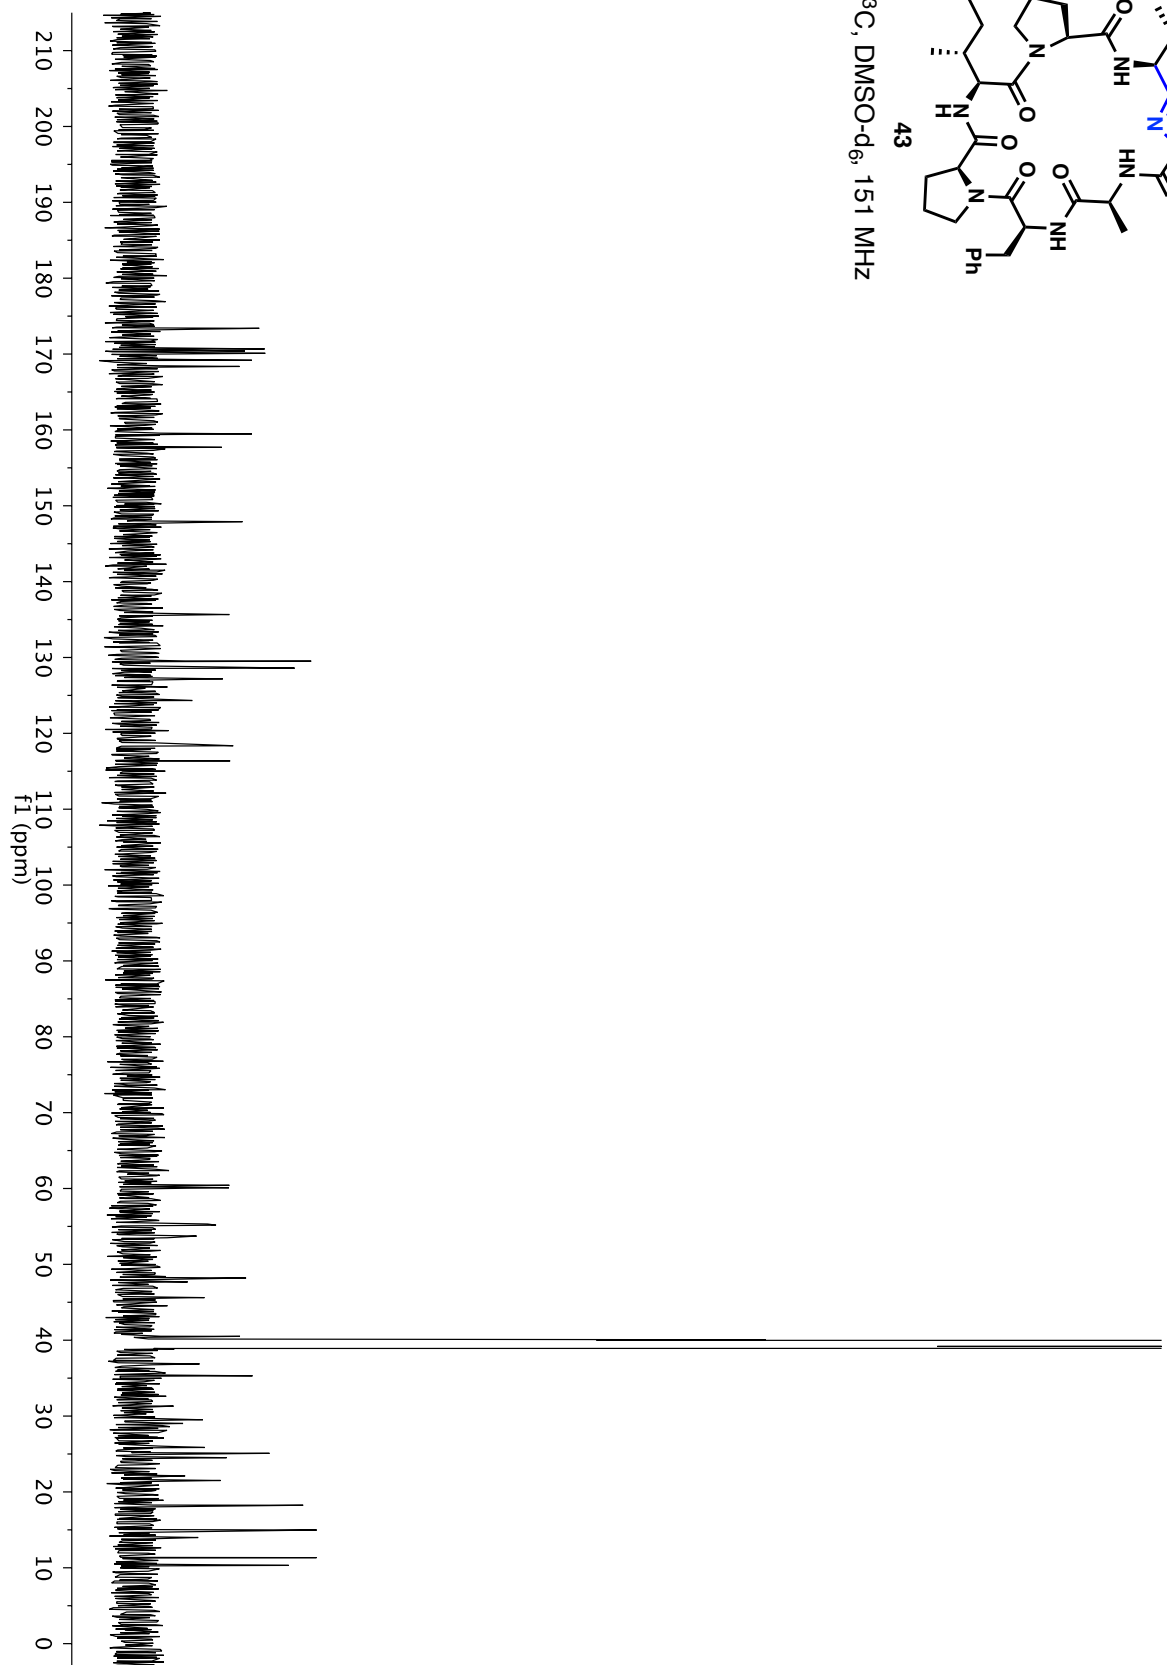

43  
COSY, DMSO-d<sub>6</sub>, 600 MHz

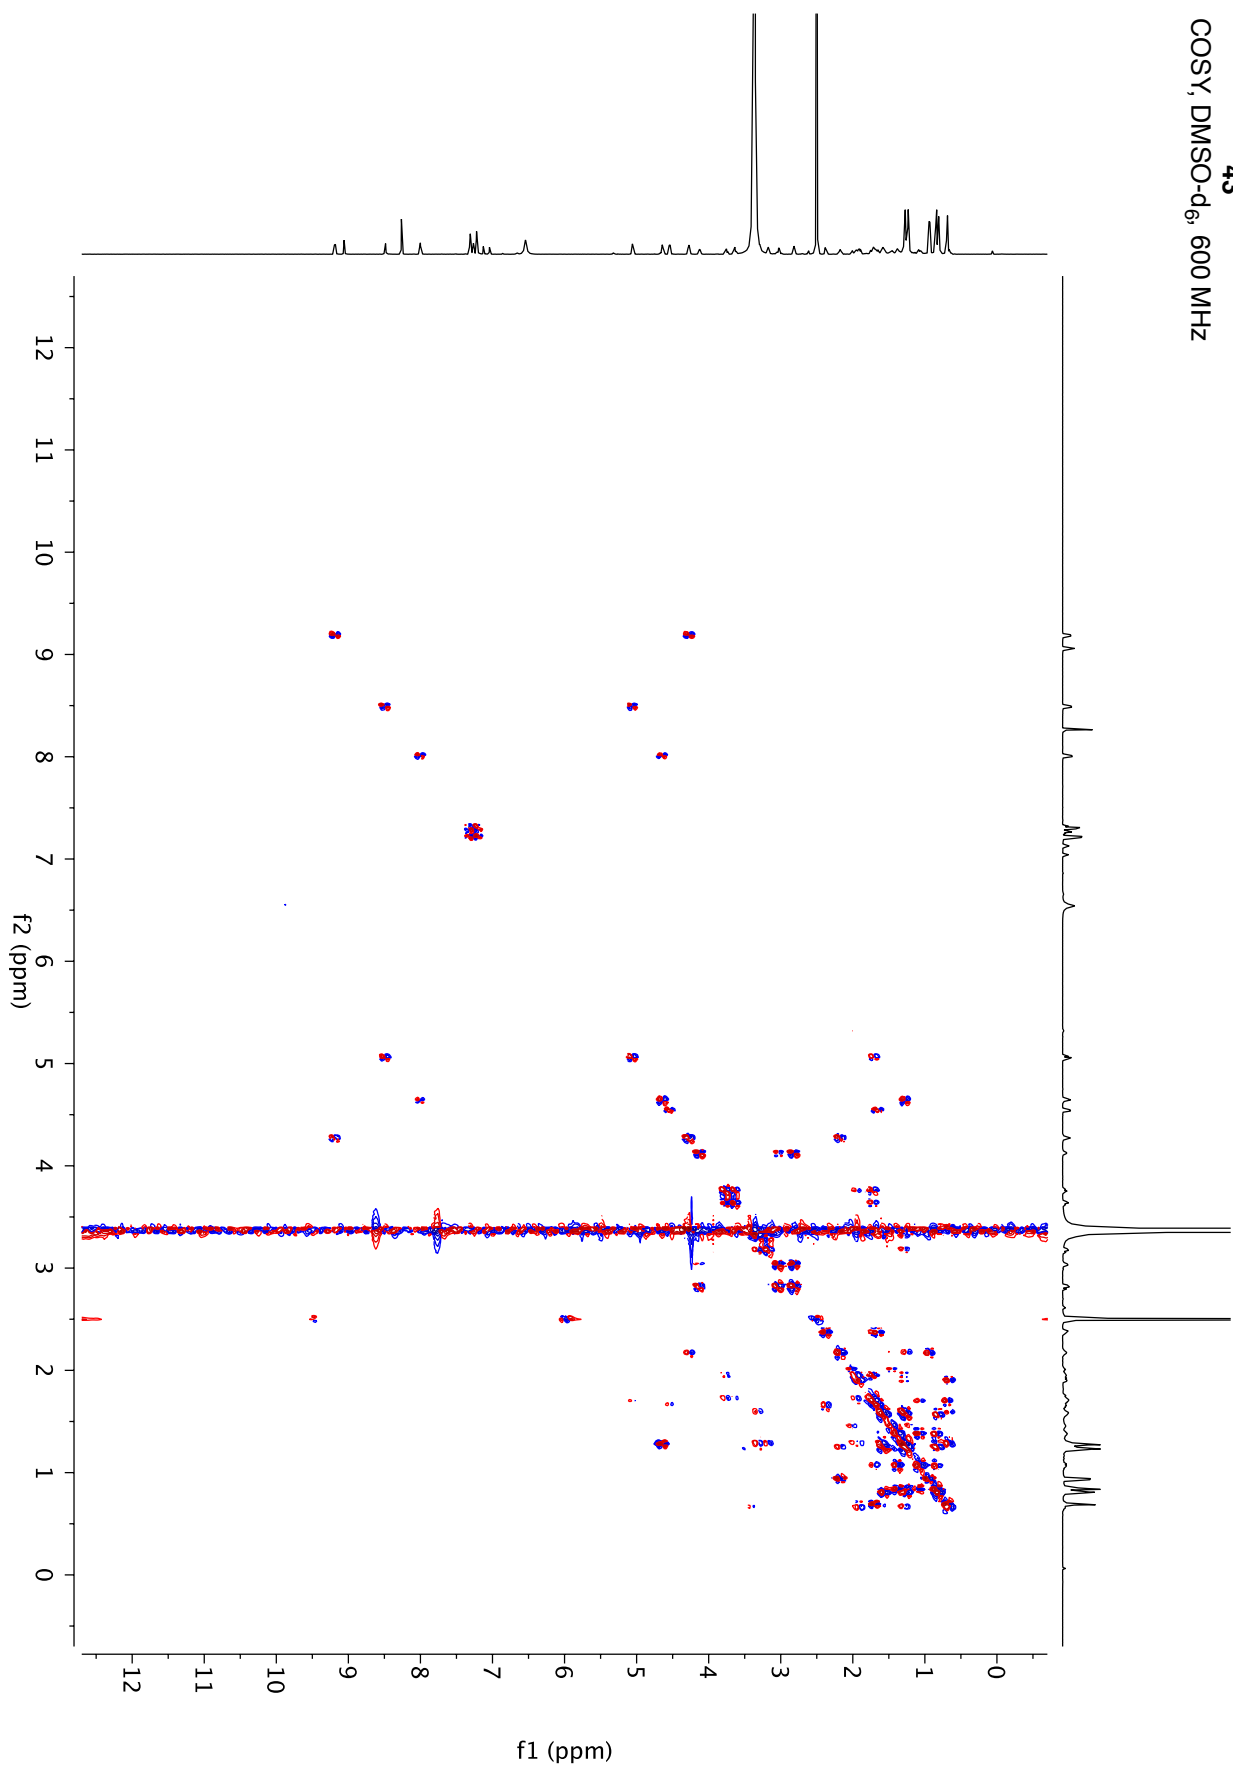

S303

## Circular Dichroism

All far-UV CD spectra were acquired at room temperature in 30% (v/v) acetonitrile-d<sub>3</sub> using a JASCO J-815 spectropolarimeter. A quartz cuvette with a pathlength of 1 mm was used for all experiments. All spectra are the averages of four repeats, recorded over a range from 250 to 190 nm with each scan recorded at intervals of 0.5 nm and an averaging time of 3 s.

## Amide Temperature Coefficient Measurements by NMR

The temperature dependence of amide chemical shifts is well established and has been widely used to assess the solvent shielding properties of amide protons.<sup>17-19</sup> Accordingly, amide proton temperature coefficients were extracted from 1D and TOCSY spectra acquired on a Bruker Avance III 600 MHz spectrometer. Spectra were measured at 282, 291, 300 and 309 K and referenced to acetonitrile at 1.968 ppm. Assignments of the amide protons were made using conventional 2D NMR approaches.

Temperature coefficients are categorized as the following;  $\Delta\delta_{\text{HN}}/\Delta T$  with values less than -4.6 ppb/K indicate water-exposed NHs. Intermediate values from -4.6 to -3.0 ppb/K indicate intermediate shielding and potentially weak or strained hydrogen bonding. Whereas  $\Delta\delta_{\text{HN}}/\Delta T$  values greater than -3.0 ppb/K place NHs in the highly shielded and potentially strongly hydrogen bound category.<sup>20-22</sup> This information is summarized in the **Table S1**.

## TOCSY spectra of peptides

The TOCSY spectra presented in this supplementary information were acquired at 291 K in 30% (v/v) acetonitrile-d<sub>3</sub> with a mixing time of 80 ms.

| N-H Shift ( $\Delta\delta_{\text{HN}}/\Delta T$ ) | Structural Implications              |
|---------------------------------------------------|--------------------------------------|
| > -3.0 ppb K <sup>-1</sup>                        | strong shielding or H-bonding        |
| < -4.6 ppb K <sup>-1</sup>                        | solvent exposed                      |
| < -3 and > -4.6 ppb K <sup>-1</sup>               | weak/strained shielding or H-bonding |

**Table S1.** Amide proton chemical shift values,  $\Delta\delta_{\text{HN}}/\Delta T$ , and their corresponding properties.

# Circular Dichroism Studies

## Natural products and linear precursors

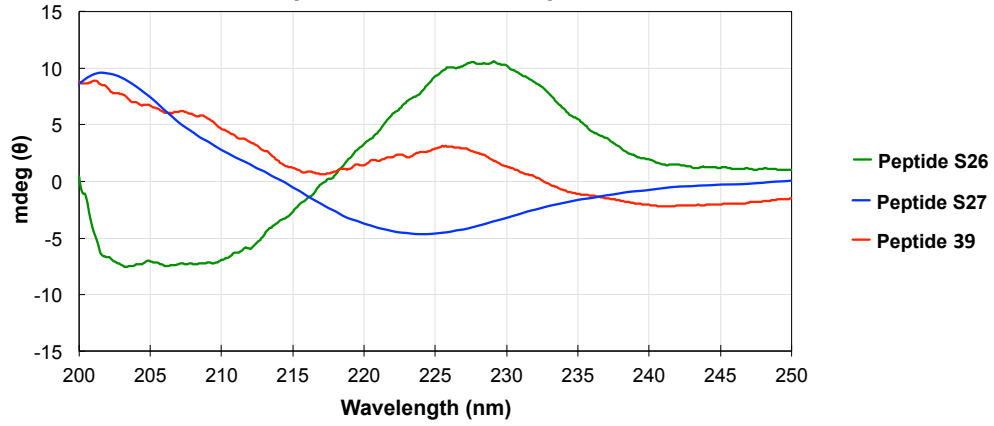

## Linear amino aldehydes

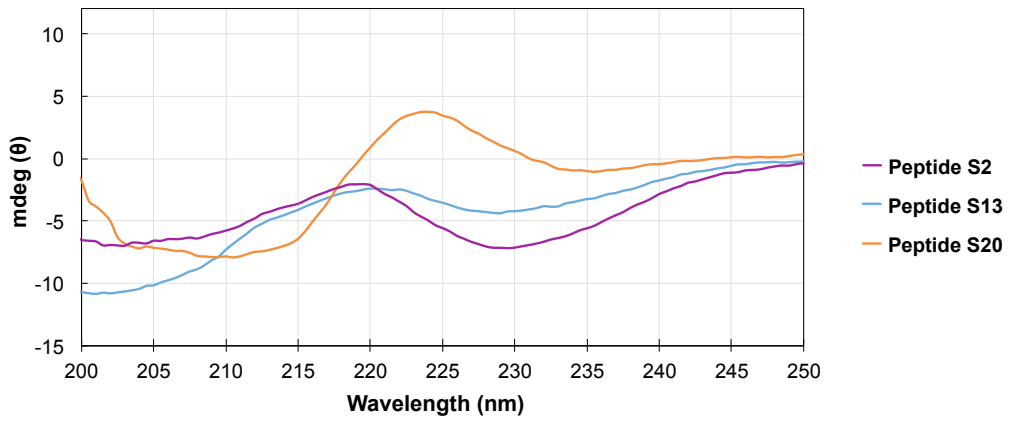

## Cyclic peptides

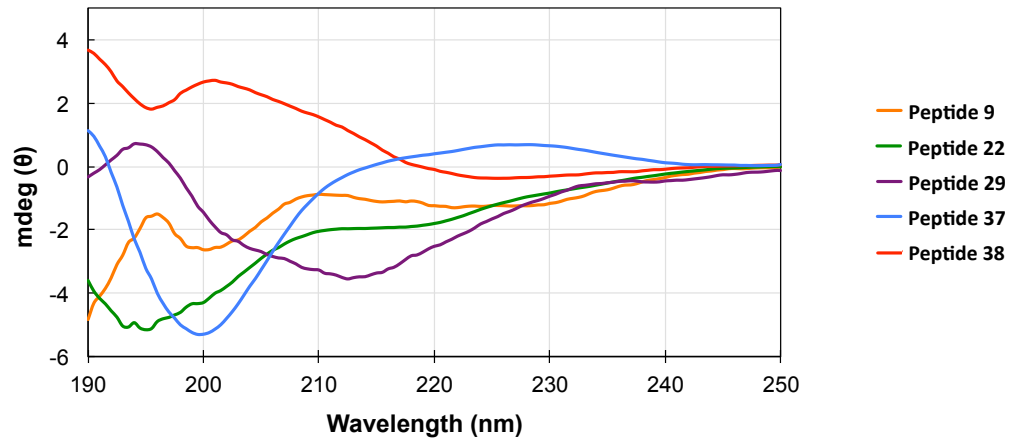

## Variable Temperature NMR Studies

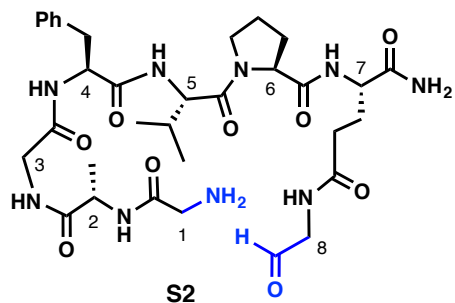

| Amino Acid | $\Delta\delta_{\text{HN}}/\Delta T$ (ppb K <sup>-1</sup> ) |
|------------|------------------------------------------------------------|
| Gly1       |                                                            |
| Ala2       | -6.10                                                      |
| Gly3       | -6.87                                                      |
| Phe4       | -5.70                                                      |
| Val5       | -6.81                                                      |
| Pro6       |                                                            |
| Glu7       | -8.25                                                      |
| Glu7b      | -8.04                                                      |
| Gly8       |                                                            |

TOCSY, 30% (v/v) MeCN-d<sub>3</sub>, 600 MHz

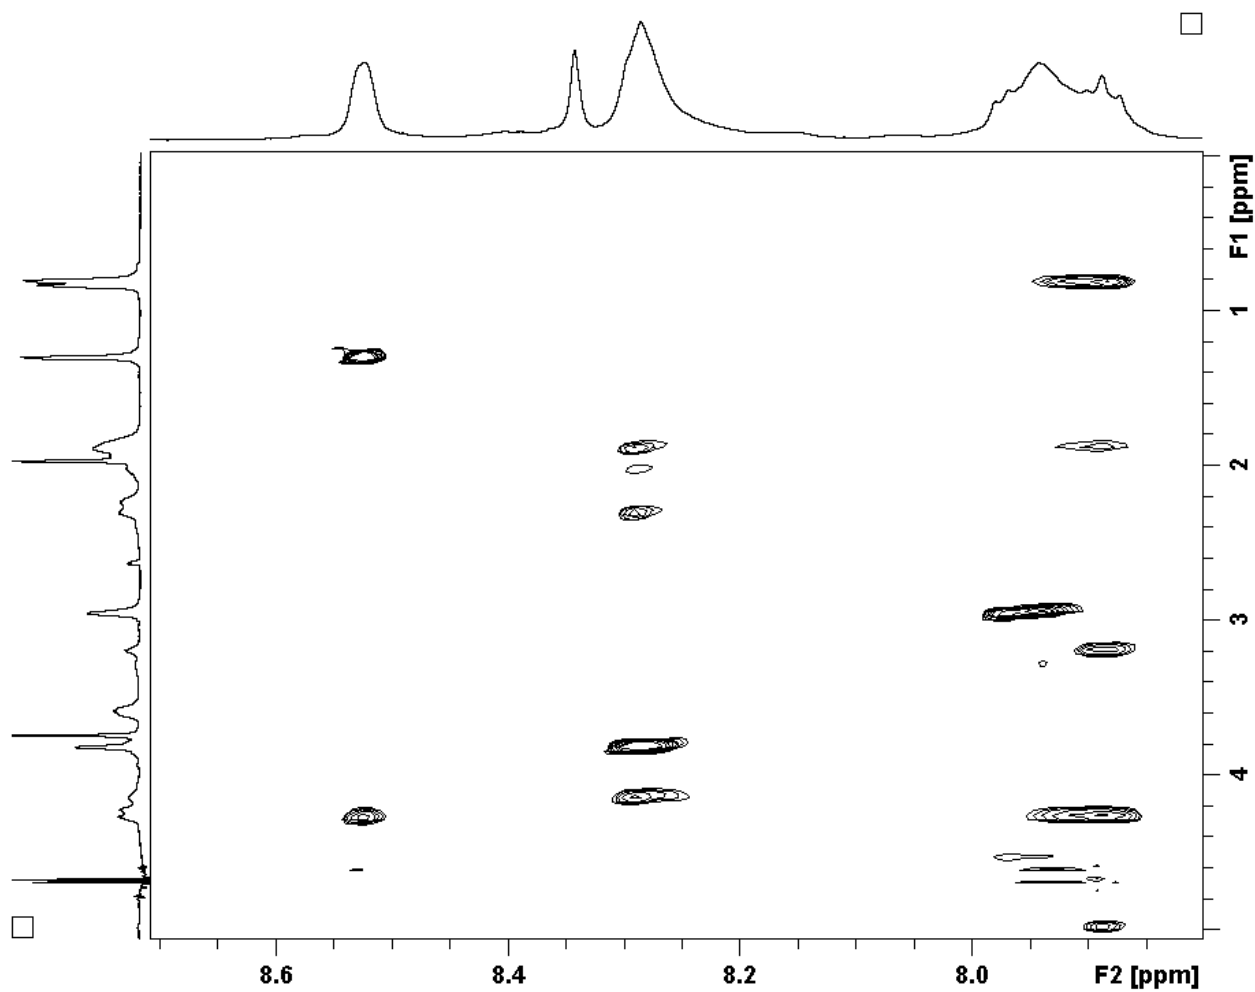

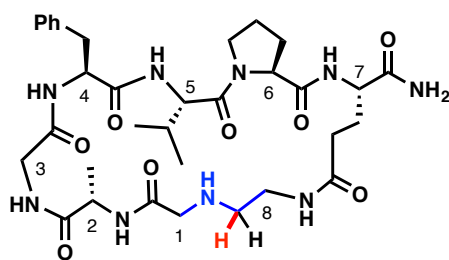

| Amino Acid | $\Delta\delta_{HN}/\Delta T$ (ppb K <sup>-1</sup> ) |
|------------|-----------------------------------------------------|
| Gly1       | -5.36                                               |
| Ala2       | -5.88                                               |
| Gly3       | -5.80                                               |
| Phe4       | -6.09                                               |
| Val5       | -4.58                                               |
| Pro6       |                                                     |
| Glu7       | -6.72                                               |
| Gly8       | -5.88                                               |
| Val5 minor | -4.83                                               |
| Phe4 minor | -3.56                                               |

9  
TOCSY, 30% (v/v) MeCN-d<sub>3</sub>, 600 MHz

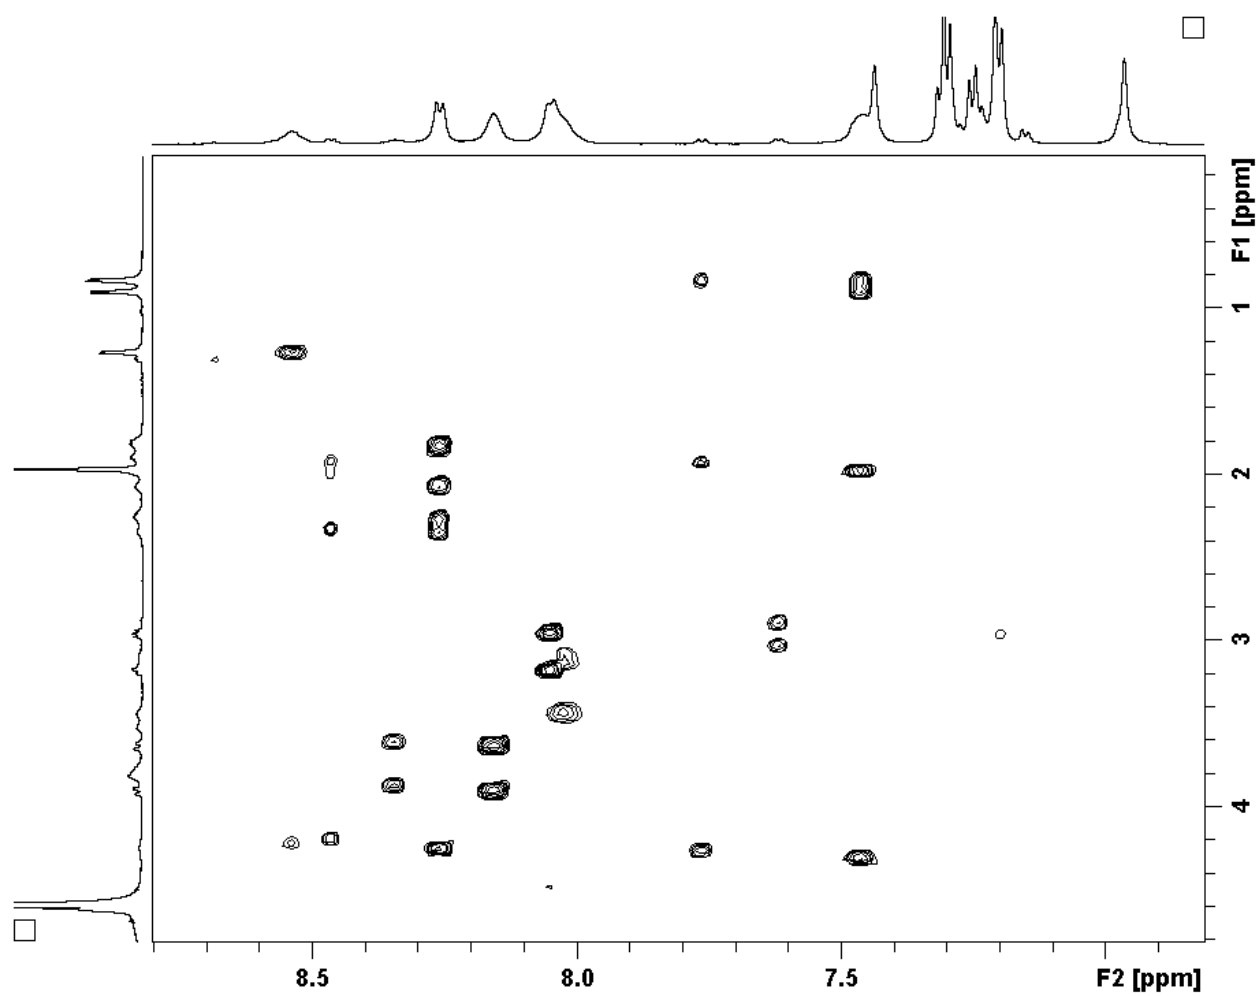

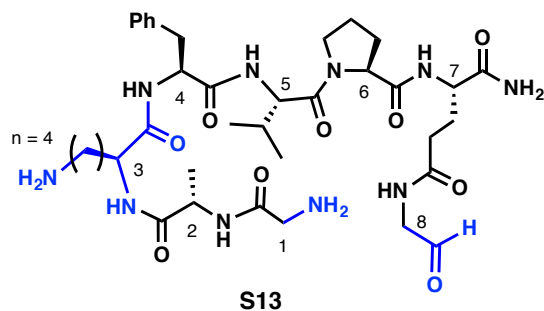

| Amino Acid | $\Delta\delta_{HN}/\Delta T$ (ppb K <sup>-1</sup> ) |
|------------|-----------------------------------------------------|
| Gly1       | -6.47                                               |
| Ala2       | -5.59                                               |
| Lys3       | -6.69                                               |
| Phe4       | -6.65                                               |
| Val5       | -9.32                                               |
| Pro6       |                                                     |
| Glu7       | -7.13                                               |
| Gly8       | -6.35                                               |

TOCSY, 30% (v/v) MeCN-d<sub>3</sub>, 600 MHz

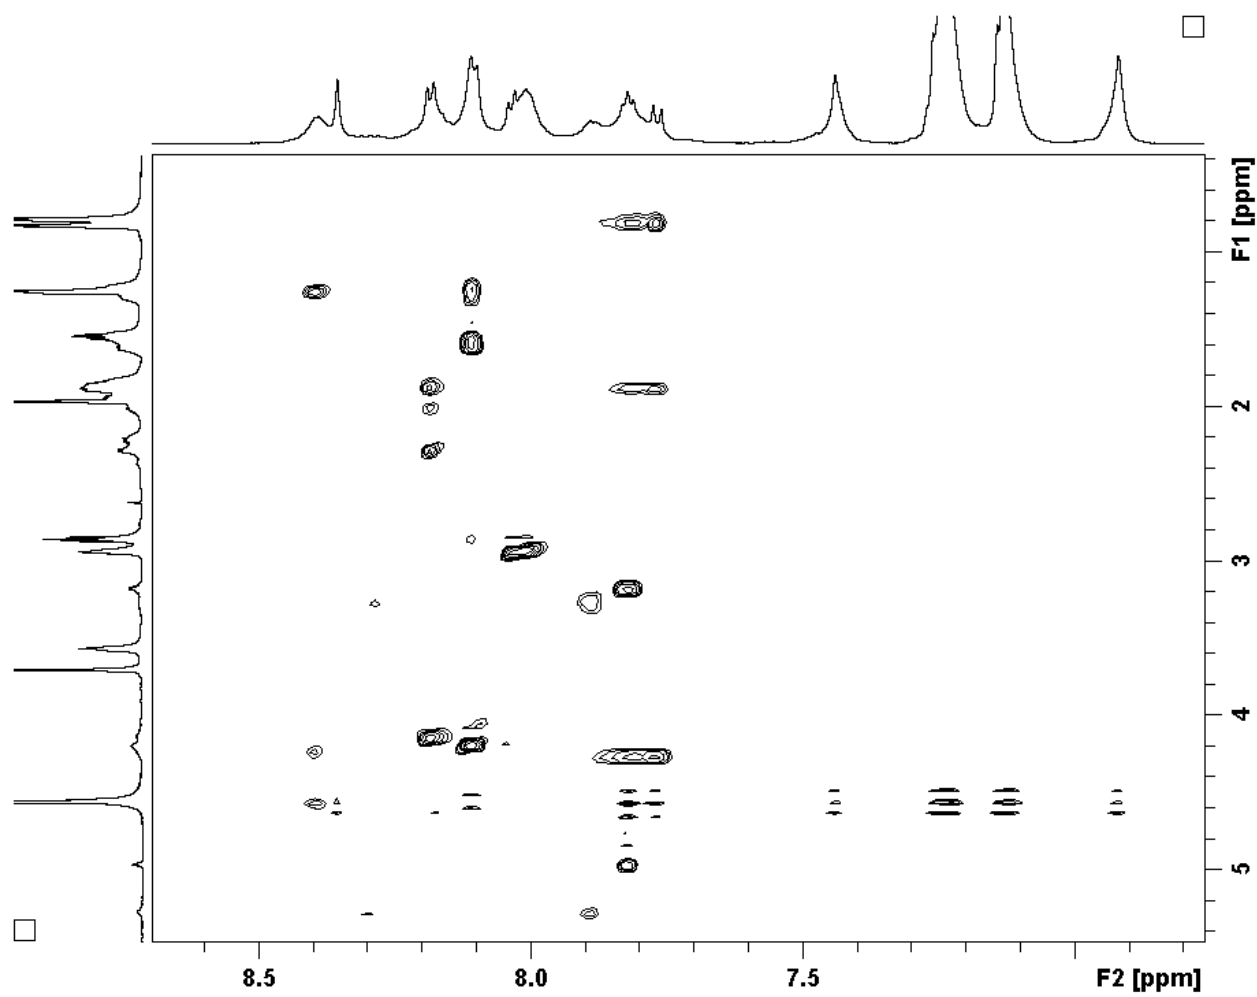



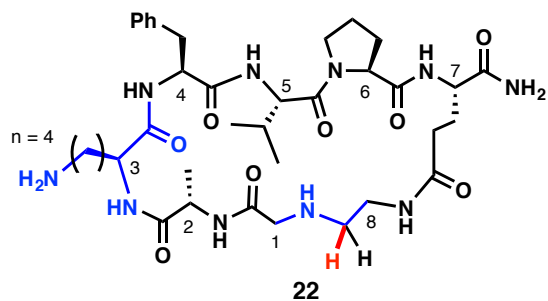

| Amino Acid | $\Delta\delta_{HN}/\Delta T$ (ppb K <sup>-1</sup> ) |
|------------|-----------------------------------------------------|
| Gly1       | -4.84                                               |
| Ala2       | -5.61                                               |
| Lys3       | -5.80                                               |
| Phe4       | -8.01                                               |
| Val5       | -2.92                                               |
| Pro6       |                                                     |
| Glu7       | -7.02                                               |
| Gly8       | -4.90                                               |

TOCSY, 30% (v/v) MeCN-d<sub>3</sub>, 600 MHz

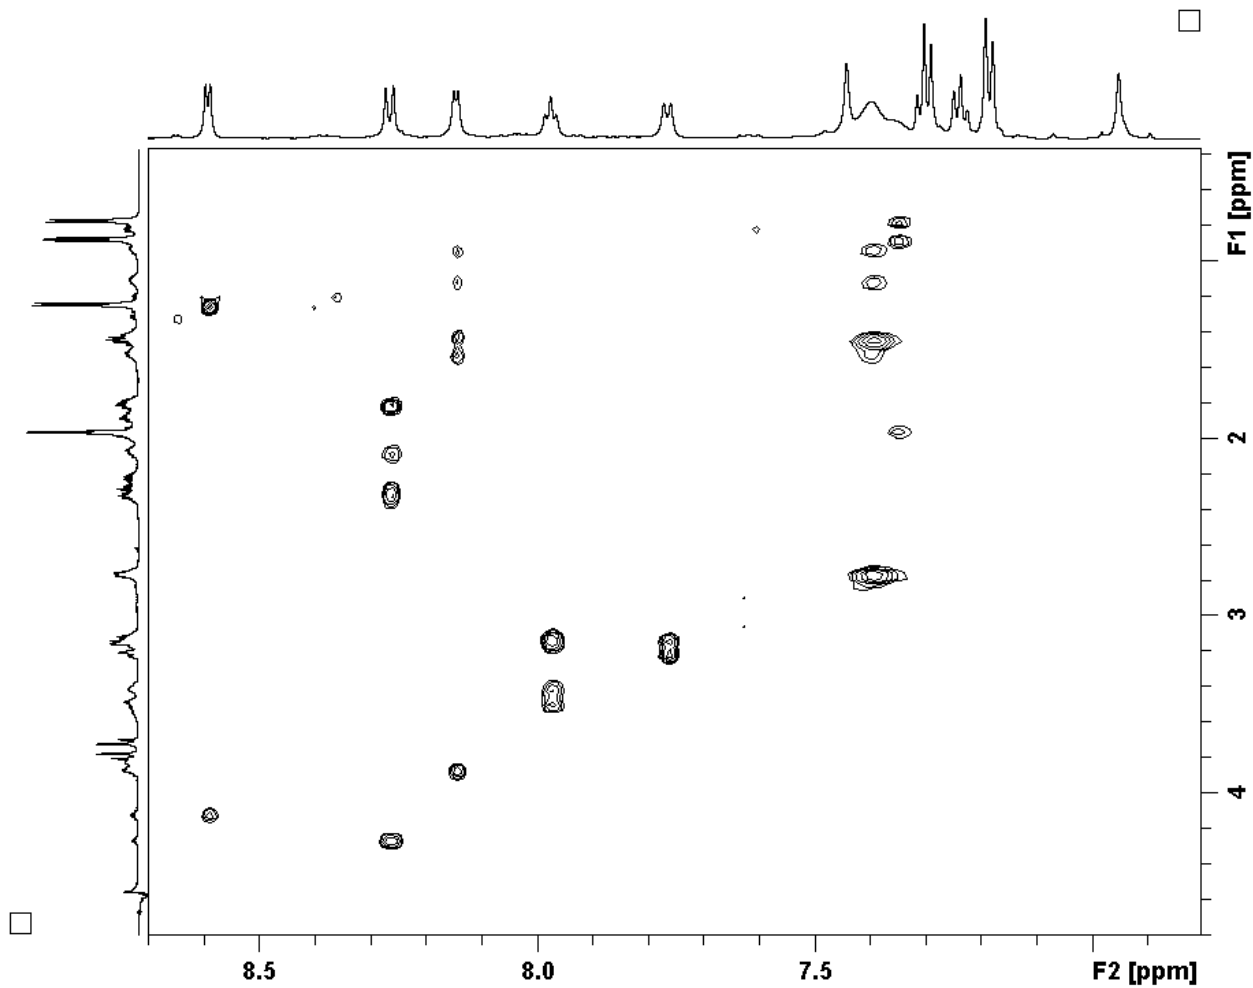

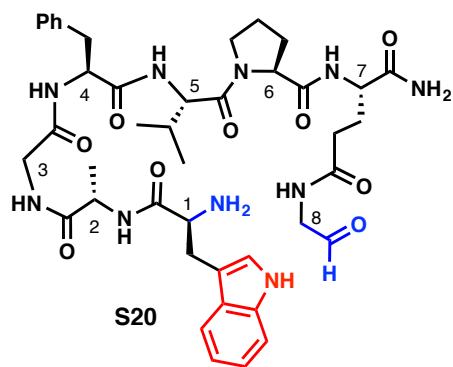

| Amino Acid | $\Delta\delta_{HN}/\Delta T$ (ppb K <sup>-1</sup> ) |
|------------|-----------------------------------------------------|
| Trp1       | -6.49                                               |
| Ala2       | -6.71                                               |
| Gly3       | -5.87                                               |
| Phe4       | -1.97                                               |
| Val5       | -5.98                                               |
| Pro6       |                                                     |
| Glu7       | -7.28                                               |
| Gly8       | -6.31                                               |

TOCSY, 30% (v/v) MeCN-d<sub>3</sub>, 600 MHz

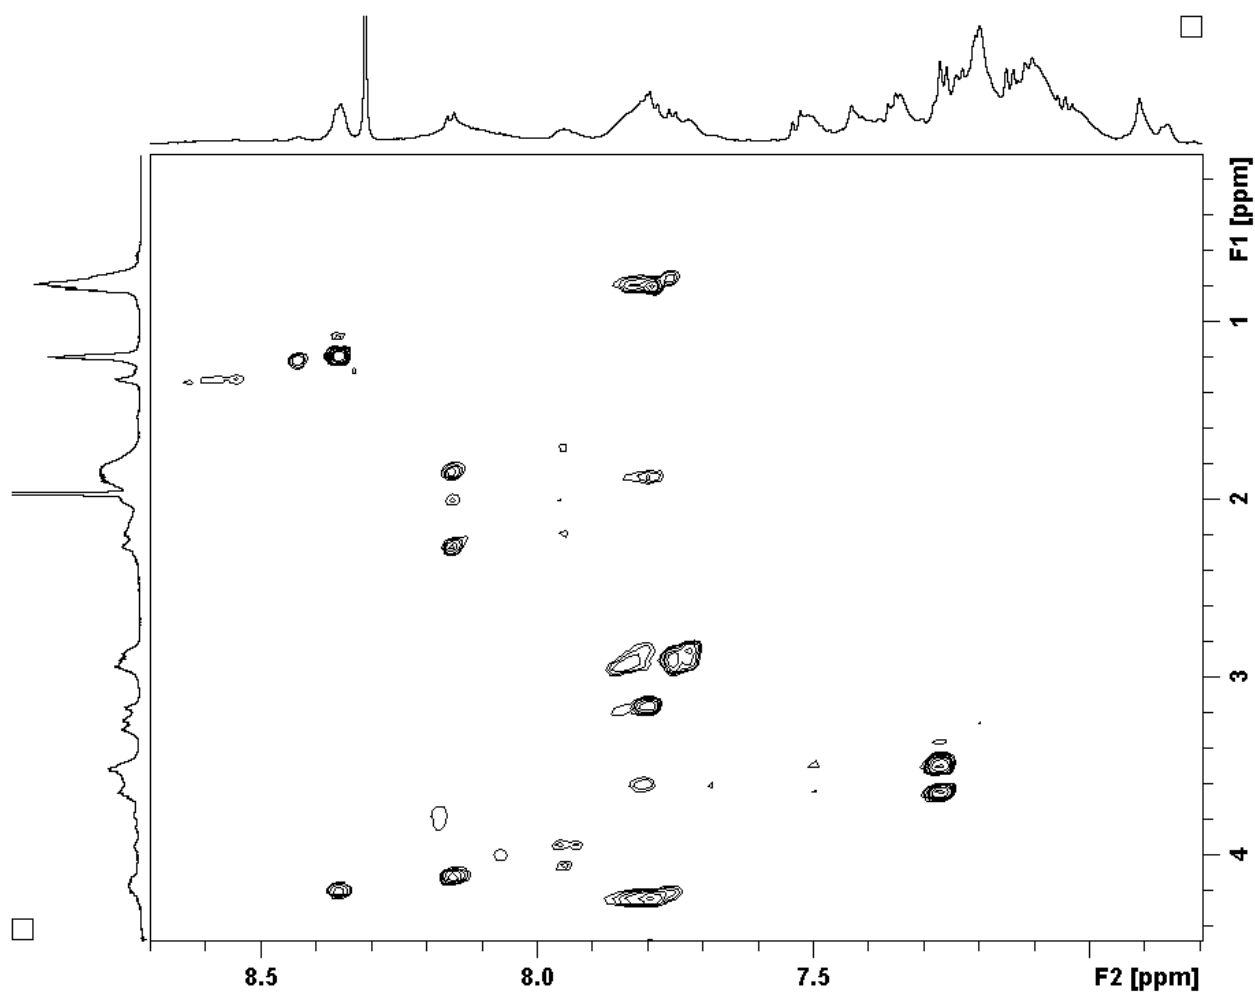

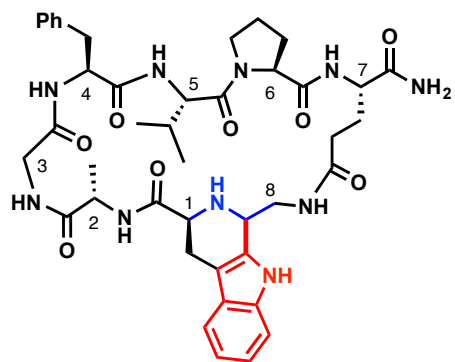

| Amino Acid | $\Delta\delta_{HN}/\Delta T$<br>(ppb K <sup>-1</sup> ) |
|------------|--------------------------------------------------------|
| Trp1       | -5.34                                                  |
| Ala2       | -6.17                                                  |
| Gly3       | -4.90                                                  |
| Phe4       | -4.94                                                  |
| Val5       | -5.49                                                  |
| Pro6       |                                                        |
| Glu7       | -5.98                                                  |
| Gly8       | -5.81                                                  |

29 (major diastereomer)

TOCSY, 30% (v/v) MeCN-d<sub>3</sub>, 600 MHz

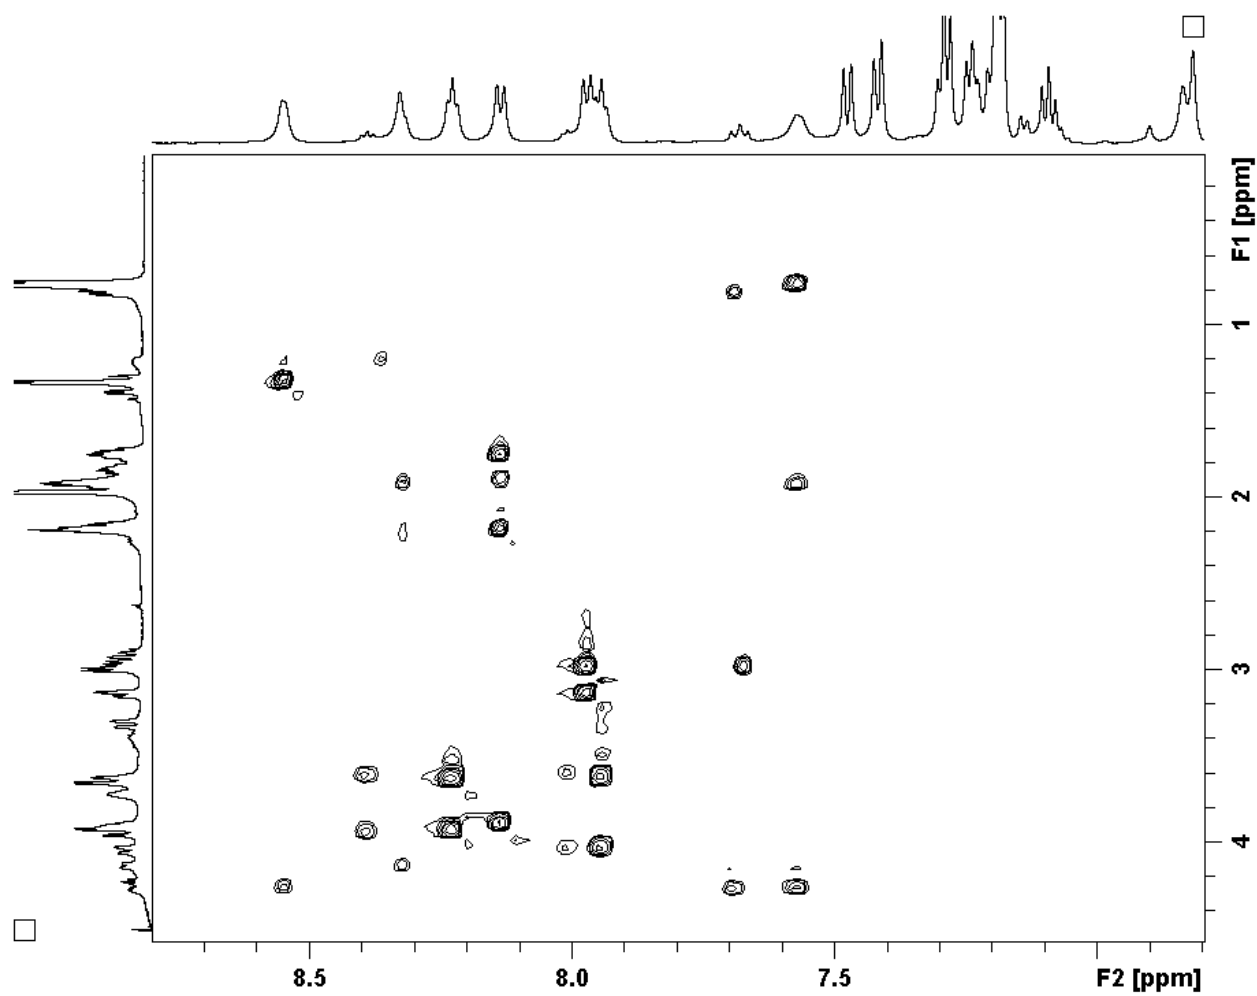

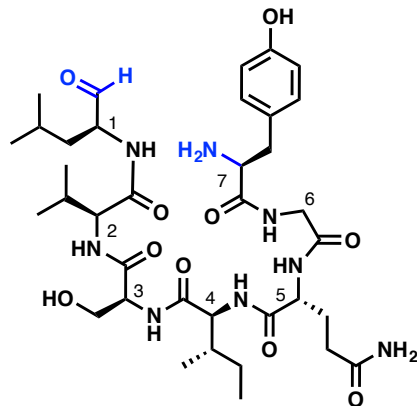

| Amino Acid  | $\Delta\delta_{HN}/\Delta T$<br>(ppb K <sup>-1</sup> ) |
|-------------|--------------------------------------------------------|
| Leu1        | -4.96                                                  |
| Val2        | -4.72                                                  |
| Ser3        | -4.89                                                  |
| Ile4        | -4.61                                                  |
| Gln5        | -5.03                                                  |
| Gly6        | -5.21                                                  |
| Tyr7        | -4.62                                                  |
| Val2, minor | -4.44                                                  |
| Tyr7, minor | -5.07                                                  |

**S26** (scytonemide A aldehyde)  
TOCSY, 30% (v/v) MeCN-d<sub>3</sub>, 600 MHz

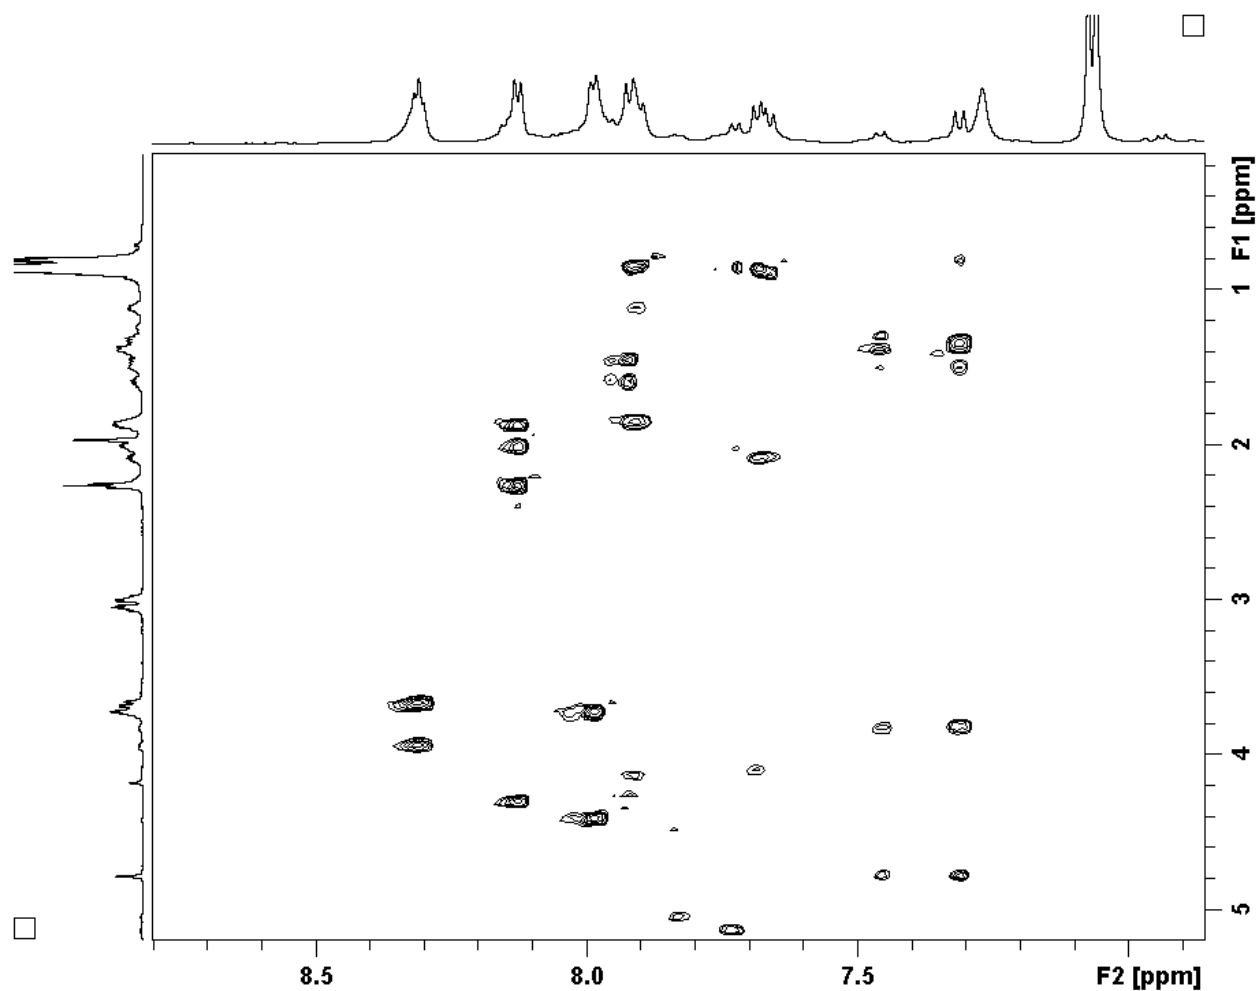

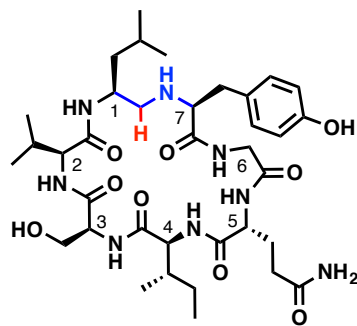

| Amino Acid | $\Delta\delta_{HN}/\Delta T$ (ppb K <sup>-1</sup> ) |
|------------|-----------------------------------------------------|
| Leu1       | -4.29                                               |
| Val2       | -6.30                                               |
| Ser3       | -2.99                                               |
| Ile4       | -7.59                                               |
| Gln5       | -5.65                                               |
| Gly6       | -3.92                                               |
| Tyr7       | -4.29                                               |

37

TOCSY, 30% (v/v) MeCN-d<sub>3</sub>, 600 MHz

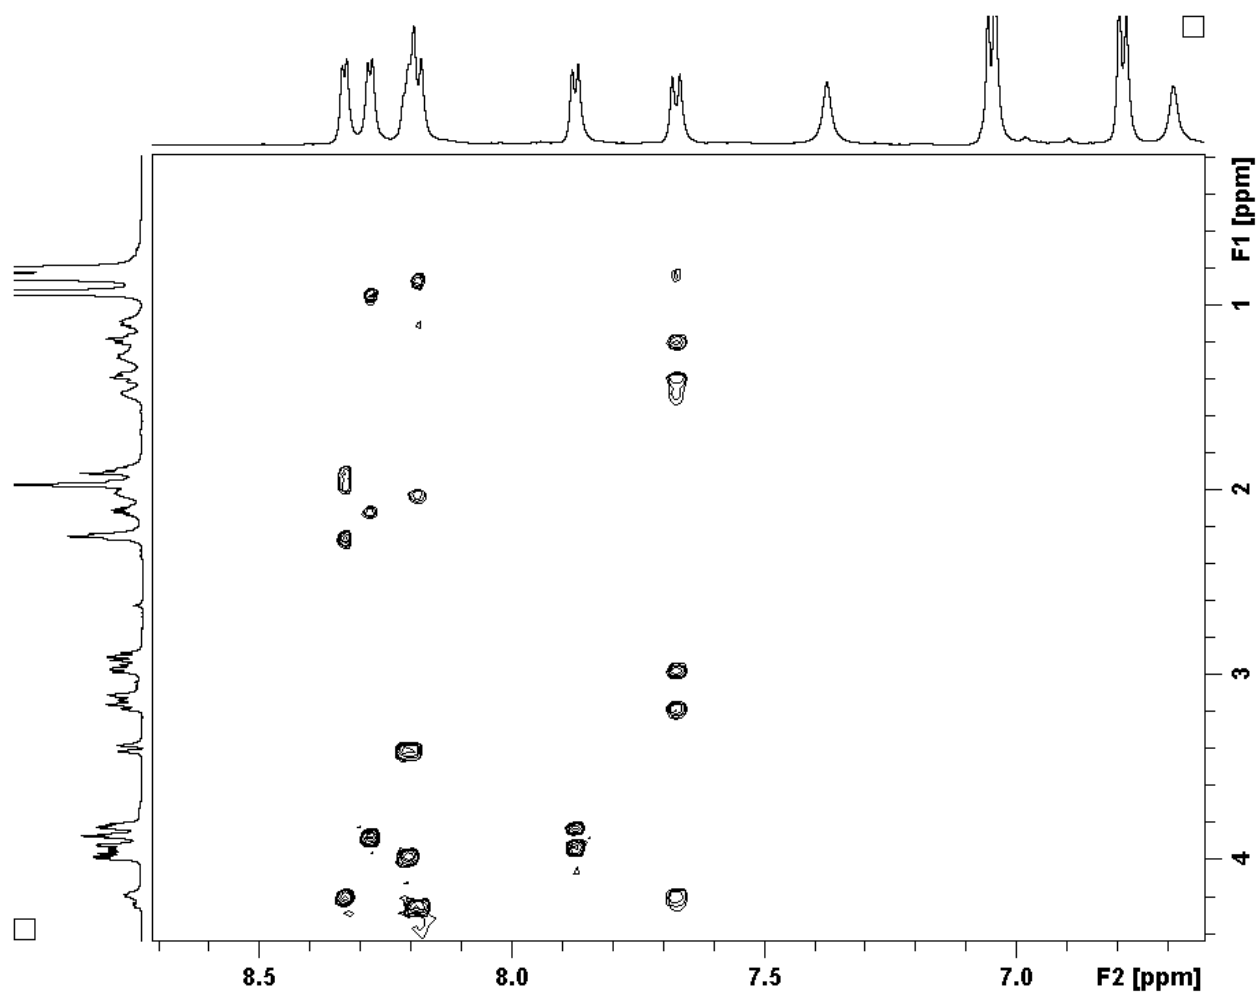

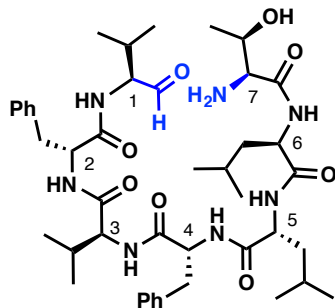

| Amino Acid | $\Delta\delta_{HN}/\Delta T$ (ppb K <sup>-1</sup> ) |
|------------|-----------------------------------------------------|
| Val1       | -3.89                                               |
| Phe2       | -2.47                                               |
| Val3       | -2.43                                               |
| Phe4       | -4.25                                               |
| Leu5       | -4.73                                               |
| Leu6       | -5.72                                               |
| NH2        | -6.04                                               |

S27 (koranimine aldehyde)  
TOCSY, 30% (v/v) MeCN-d<sub>3</sub>, 600 MHz

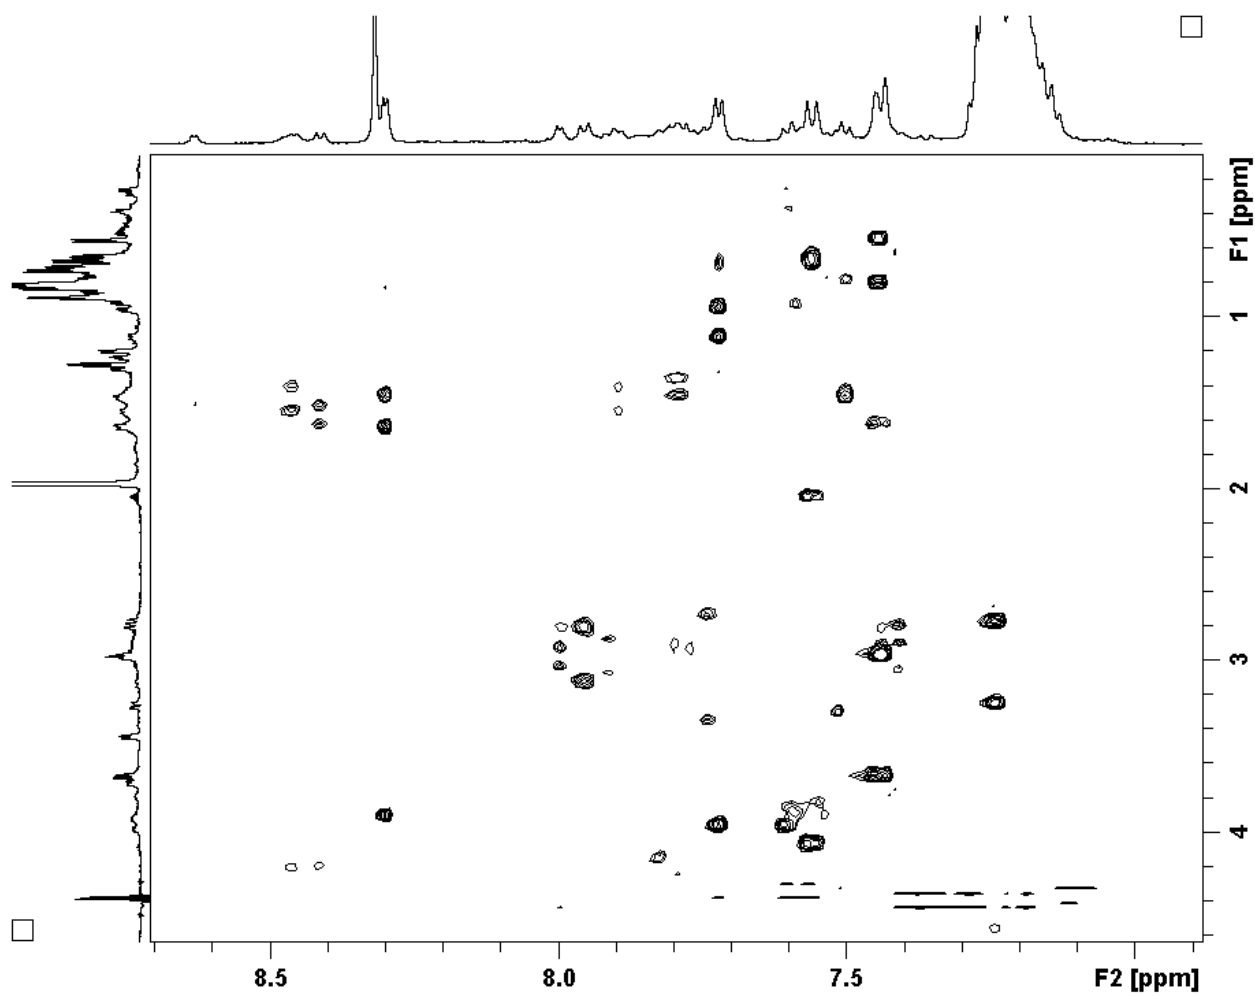

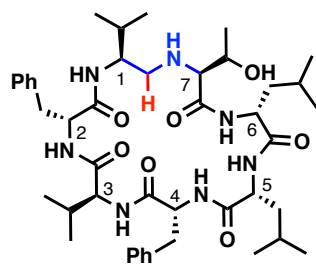

| Amino Acid | $\Delta\delta_{HN}/\Delta T$ (ppb K <sup>-1</sup> ) |
|------------|-----------------------------------------------------|
| Val1       | -4.40                                               |
| Phe2       | -1.51                                               |
| Val3       | -8.67                                               |
| Phe4       | -9.70                                               |
| Leu5       | -3.85                                               |
| Leu6       | -8.02                                               |
| Val-OH7    | -4.36                                               |

38

TOCSY, 30% (v/v) MeCN-d<sub>3</sub>, 600 MHz

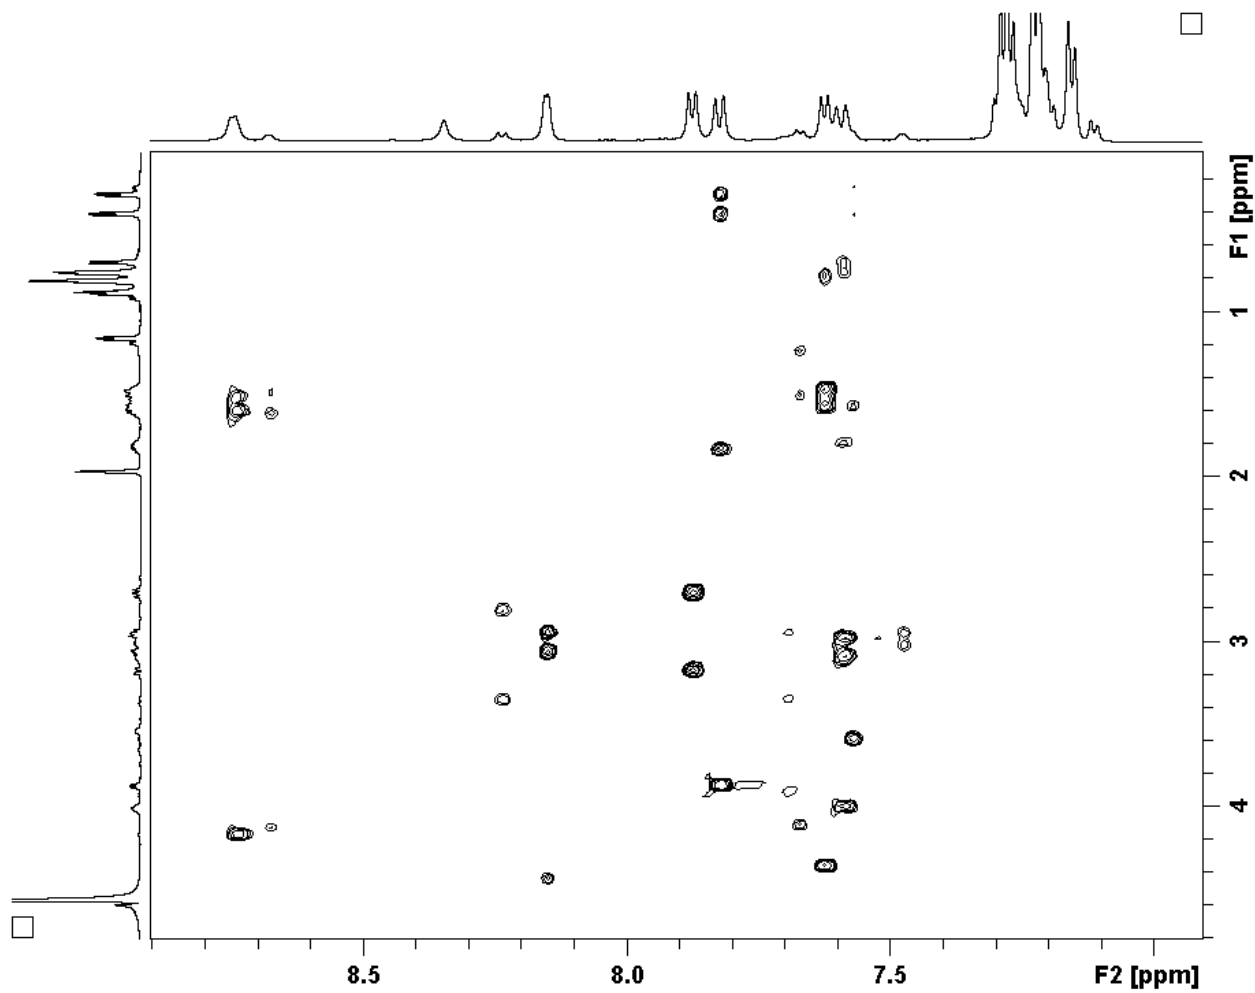

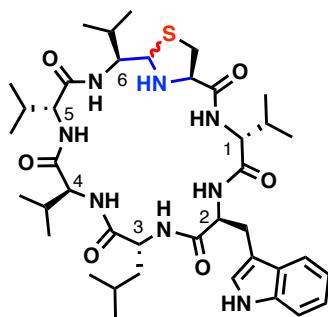

39 (lugdunin)

TOCSY, 30% (v/v) MeCN-d<sub>3</sub>, 600 MHz

| Peak, (Residue) | $\Delta\delta_{\text{HN}}/\Delta T$<br>(ppb K <sup>-1</sup> ) |
|-----------------|---------------------------------------------------------------|
| 1 (Leu3 iso 1)  | -2.90                                                         |
| 2 (Trp2 iso 1)  | -5.24                                                         |
| 3 (Thia iso 1)  | -5.32                                                         |
| 4 (Trp2 iso 2)  | -5.31                                                         |
| 5 (Leu3 iso 2)  | -2.28                                                         |
| 6 (Val)         | -2.35                                                         |
| 7 (Val1 iso 1)  | -5.47                                                         |
| 8 (Val1 iso 2)  | -5.00                                                         |
| 9 (Val)         | -5.07                                                         |
| 10 (Thia iso 2) | -2.97                                                         |
| 11              | -5.39                                                         |

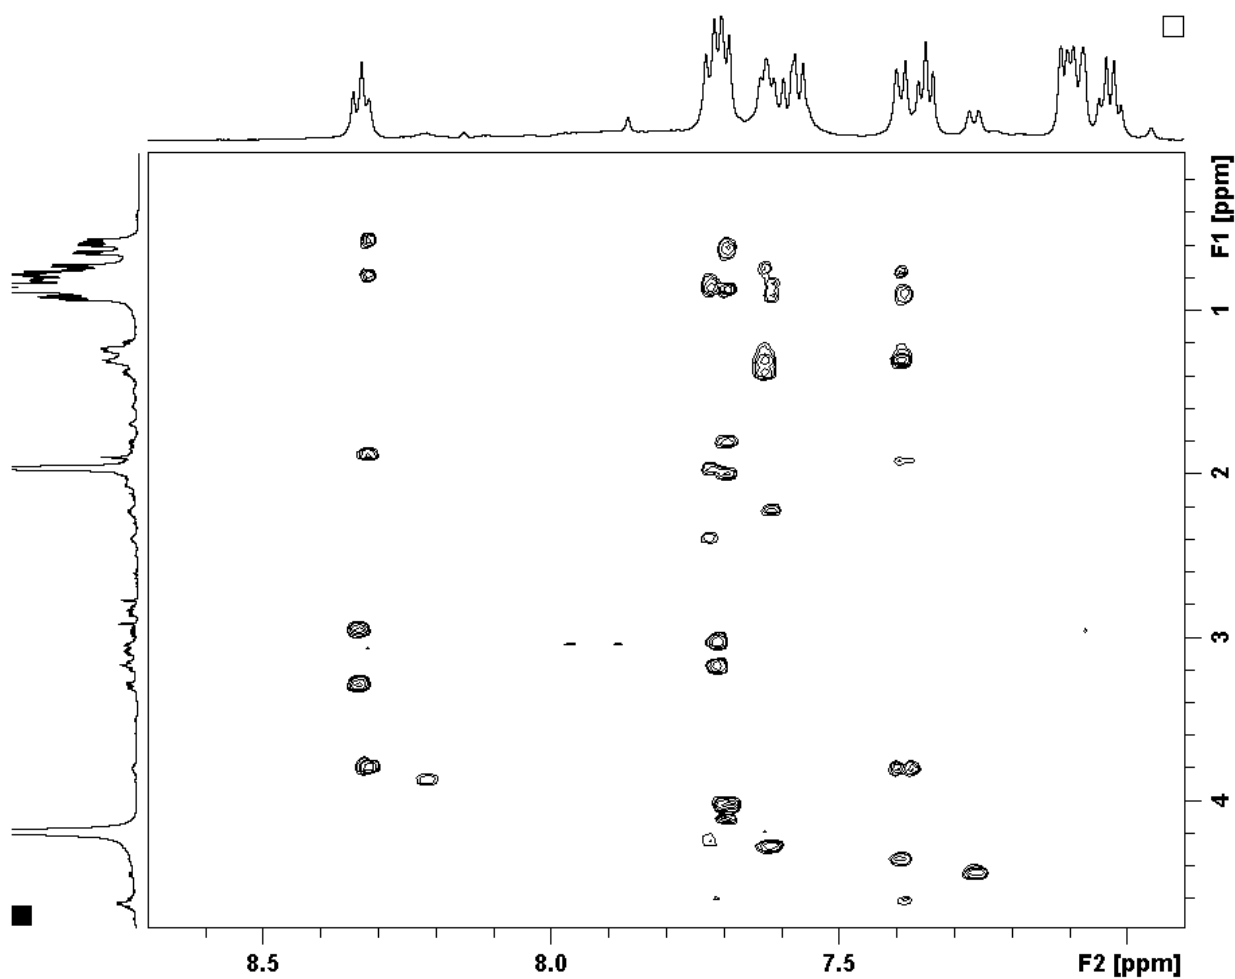



## Troubleshooting and Frequently Asked Questions

### A. Aldehyde Synthesis

**Question 1:** How were the peptide sequences chosen?

**Answer:** While many of the substrate structures were inspired by natural products, a number of the peptides were designed through the use of the *Random Peptide Sequence* tool provided by The Sequence Manipulation Suite. See **Random Peptide Sequence Generator** (p. S9) for more information.

**Question 2:** How do you prepare peptide aldehydes?

**Answer:** Although there are multiple ways to prepare peptide aldehydes for the imine-mediated macrocyclization strategy, we prefer direct incorporation of a masked aldehyde (e.g. aminoacetaldehyde dimethyl acetal—see general protocol 1) onto the solid-phase or anchoring of a pre-formed Fmoc-protected amino aldehyde onto “Rink TG” resin (see general protocol 2). Both strategies are described in the general methods. An alternative approach includes the use of a Weinreb amide functionalized resin. However, as this method requires cleavage of the peptide from the resin using a strong reductant ( $\text{LiAlH}_4$ ), some sensitive functional groups may pose a problem. Both general methods 1 and 2, on the other hand, allow for release of the target aldehyde upon acidic cleavage from the resin. Although not employed in this study, backbone amide linker (BAL) technologies may also be readily employed for the preparation of C-terminally modified peptides, including peptide aldehydes.<sup>23</sup>

**Question 3:** Do you see epimerization of C-terminal aldehydes with  $\alpha$ -chirality?

**Answer:** Epimerization of chiral aldehydes is an important factor to consider. Loading amino aldehydes via an oxazolidine linkage onto TG-resin in some cases may lead to epimerization. We observed a small amount of epimerization in the preparation of aldehyde **S12**, a pentapeptide bearing a D-Leu aldehyde at the C-terminus. Nevertheless, this minor component was separable by HPLC, thus providing homogeneous material based on NMR analysis of the purified amino aldehyde. Generally, when dealing with aldehydes with  $\alpha$ -chirality, care should always be taken when purifying and analyzing the crude peptide.

Furthermore, the purified material should be evaluated by NMR prior to use in a macrocyclization reaction.

**Question 4:** How do you store the aldehydes?

**Answer:** We generally store the aldehydes as lyophilized solids at  $-20\text{ }^{\circ}\text{C}$ . They are generally stable, but over time will start to oligomerize. This process is not necessarily deleterious to the outcome of a macrocyclization reaction—the reversibility of oligomer formation allows re-equilibration under the dilute reaction conditions to afford good yields of the desired monomeric macrocycle. For a direct example of this reversible phenomenon, refer to the one-pot Pictet-Spengler-oxidation approach to afford peptide **30**. In this example, application of an aldehyde that had been stored at  $4\text{ }^{\circ}\text{C}$  for four months provided nearly identical yields in a Pictet-Spengler macrocyclization reaction as a freshly prepared aldehyde. When using an aldehyde that has oligomerized, we suggest pre-equilibrating the reaction mixture by stirring at 1 mM concentration in the desired reaction solvent prior to the addition of an external nucleophile (e.g. KCN or  $\text{NaBH}_3\text{CN}$ ).

## **B. General Macrocyclization Questions**

**Question 1:** How do you monitor the reactions?

**Answer:** The progress of reactions is most efficiently monitored using LC-MS or analytical HPLC. A small sample of the reaction mixture is diluted in water or MeOH and injected directly into the instrument.

**Question 2:** How do you purify the crude reaction mixture?

**Answer:** Preparative reverse-phase HPLC is the most efficient way to purify the peptide macrocycles. Following elution from the column, pure fractions are combined and concentrated on a lyophilizer to afford the target peptide as a fluffy white solid.

**Question 3:** What are the major byproducts observed?

**Answer:** By-product formation generally depends on the type of macrocyclization reaction:

- Strecker macrocyclization: Addition of KCN to the aldehyde to form a cyanohydrin will

often occur in peptides that are not conformationally pre-disposed to cyclization. The reversibility of this addition, however, often allows for the funneling of material to the target  $\alpha$ -aminonitrile Strecker product.

- Reductive amination: Reduction of the aldehyde to the corresponding alcohol is the most commonly observed by-product. The extent of aldehyde reduction is highly pH dependent, so various buffer and pH conditions (NaOAc buffers, pH = 3.5–7.5 and/or phosphate buffers pH = 6–8) may be screened.
- Thiazolidine cyclizations: In the case of peptides bearing StBu-disulfide protected Cys residues, incomplete reduction of the starting disulfide may cause the reaction to stall. Adding more reductant (TCEP) and keeping the solution degassed can prevent unwanted disulfide formation and help drive the reaction.
- Selenazolidine cyclization: Selenocysteine can deselenize in the presence of TCEP. Although we add sodium ascorbate to the cyclization mixture to prevent this process, potential cleavage of the C–Se bond should be monitored.

A general by-product that may result from any of the above imine-macrocyclizations is oligomerization (formation of dimers, trimers, etc.). This problem can be remedied by varying the reaction concentration, and specifically, running the reaction at higher dilution. Another possible by-product is erosion of  $\alpha$ -chirality in the case of non-Gly C-terminal aldehydes. Since these reactions are mediated by a thermodynamic (equilibrium) process, it is possible that the C-terminal residue may epimerize prior to or during the cyclization event. By observing the effects of the cyclization reaction on the  $\alpha$ -center of the peptide aldehyde, valuable information on the structure and predisposition of a peptide to cyclize can be gained.

**Question 4:** What effect does pH have on the reaction?

**Answer:** The pH can have a substantial effect on the nature of the aldehyde-imine equilibrium. As discussed above, pH effects may be employed to reduce by-product formation (e.g. aldehyde reduction in the reductive amination reaction). Given the profound effects observed with pH adjustments, we suggest having on-hand a number of potential buffer systems of varying pH, e.g. aqueous NaOAc buffers at various pH values between 3.5 and 7.5, and Na<sub>2</sub>HPO<sub>4</sub> buffers between pH 6 and 8. Generally speaking, these buffers can be used interchangeably in any of the

macrocyclization reactions (with the exception of the Pictet-Spengler reactions) and can therefore be used as a tool for optimization.

**Question 5:** Do any special precautions need to be taken when setting up the reactions?

**Answer:** The macrocyclizations proceed in open-air flasks and most often under aqueous conditions. As such, they are generally very operationally simple.

## References

1. Wang, G.; Mahesh, U.; Chen, G. Y. J.; Yao, S. *Org. Lett.* **2003**, *5*, 737.
2. Moulin, A.; Martinez, J.; Fehrentz, J. A. *J. Pept. Sci.* **2007**, *13*, 1.
3. Enck, S.; Kopp, F.; Marahiel, M. A.; Geyer, A. *ChemBioChem.* **2008**, *9*, 2597.
4. Enck, S.; Kopp, F.; Marahiel, M. A.; Geyer, A. *Org. Biomol. Chem.* **2010**, *8*, 559.
5. Metanis, N.; Keinan, E.; Dawson, P. E. *Angew. Chem. Int. Ed.* **2010**, *49*, 7049.
6. Rohde, H.; Schmalisch, J.; Harpaz, Z.; Diezmann, F.; Seitz, O. *ChemBioChem.* **2011**, *12*, 1396.
7. Ollivier, N.; Blanpain, A.; Boll, E.; Raibaut, L.; Drobecq, H.; Melnyk, O. *Org. Lett.* **2014**, *16*, 4032.
8. Ficht, S.; Payne, R. J.; Guy, R. T.; Wong, C.-H. *Chem. Eur. J.* **2008**, *14*, 3620.
9. Korshun, V. A.; Pestov, N. B.; Nozhevnikova, E. V.; Prokhorenko, I. A.; Gontarev, S. V.; Berlin, Y. A. *Synth. Commun.* **1996**, *26*, 2531.
10. de la Figuera, N.; Fiol, S.; Fernández, J.-C.; Forns, P.; Fernández-Fornier, D.; Albericio, F. *Synlett.* **2006**, *12*, 1903.
11. Evans, B. S.; Ntai, I.; Chen, Y.; Robinson, S. J.; Kelleher, N. L. *J. Am. Chem. Soc.* **2011**, *133*, 7316.
12. Bergmann, E. D. *Chem. Rev.* **1953**, *53*, 309.
13. Paukstelis, J. V.; Hammaker, R. M. *Tetrahedron Lett.* **1968**, *9*, 3557.
14. Paukstelis, J. V.; Lambing, L. L. *Tetrahedron Lett.* **1970**, *11*, 299.
15. Zipperer, A.; Konnerth, M. C.; Laux, C.; Berscheid, A.; Janek, D.; Weidenmaier, C.; Burian, M.; Schilling, N. A.; Slavetinsky, C.; Marschal, M.; Willmann, M.; Kalbacher, H.; Schitteck, B.; Brotz-Oesterhelt, H.; Grond, S.; Peschel, A.; Krismer, B. *Nature.* **2016**, *535*, 511.

16. Neilsen, D. S.; Hoang, H. N.; Lohman, R. J.; Diness, F.; Fairlie, D. P. *Org. Lett.* **2012**, *14*, 5720.
17. Urry, D. W.; Cunningham, W. D.; Ohnishi, T. *Biochemistry.* **1974**, *13*, 609.
18. Urry, D. W.; Long, M. M. *CRC Crit. Rev. Biochem.* **1976**, *4*, 1.
19. Rose, G. D.; Gierasch, L. M.; Smith, J. A. In *Advances in Protein Chemistry*, C. B. Anfinsen, J. T. E.; Frederic, M. R., Eds. Academic Press: 1985; Vol. 37, p. 1 – 109.
20. Cierpicki, T.; Otlewski, J. *J. Biomol. NMR.* **2001**, *21*, 249.
21. Andersen, N. H.; Neidigh, J. W.; Harris, S. M.; Lee, G. M.; Liu, Z.; Tong, H. *J. Am. Chem. Soc.* **1997**, *119*, 8547.
22. Baxter, N. J.; Williamson, M. P. *J. Biomol. NMR.* **1997**, *9*, 359.
23. For a detailed review of backbone-amide linkers in solid-phase peptide synthesis, see: Boas, U.; Brask, J.; Jensen, K. J. *Chem. Rev.* **2009**, *109*, 2092.
